# Supplementary material for: MYCN drives oncogenesis by cooperating with the histone methyltransferase G9a and the WDR5 adaptor to orchestrate global gene transcription
Source: PLoS Biol. 2024 Mar 28;22(3):e3002240. doi: 10.1371/journal.pbio.3002240 (PMC11003700; doi:10.1371/journal.pbio.3002240)
Supplement: S1 Data — (XLSX) [file pbio.3002240.s020.xlsx]

## Sheet: Fig. 1B
Time (h)	siCtrl		siMYCN_2		siMYCN_4
	Mean	SEM	Mean	SEM	Mean	SEM
0	10.6125	0.651806	10.2325	0.881195	8.82429	0.182277
6	9.76631	0.598722	9.57649	0.756531	8.2477	0.194514
12	9.61942	0.561212	9.47098	0.758425	8.60387	0.230588
18	10.0616	0.60467	9.92593	0.840122	9.21931	0.235507
24	11.0408	0.756504	10.5413	1.00463	10.0205	0.394906
30	11.3946	0.72266	10.2854	0.878674	10.3468	0.313823
36	11.9138	0.79091	9.91886	0.887451	10.6799	0.402302
42	12.6099	0.862719	9.37544	0.890768	11.1032	0.498087
48	13.3771	0.938403	8.8186	0.783732	11.6029	0.491478
54	14.5079	1.0326	8.62415	0.755984	12.6191	0.497264
60	16.0393	1.12715	8.5105	0.715071	13.8924	0.499523
66	18.2614	1.33825	8.89071	0.756624	15.8178	0.54873
72	21.5944	1.41639	9.62043	0.850612	18.1409	0.489715
78	25.1637	1.81205	10.2206	1.00612	20.1522	0.562503
84	29.825	2.09502	11.1893	1.1216	23.1365	0.70767
90	35.8756	2.63322	12.1404	1.14454	27.031	0.522686
96	42.8945	3.11591	13.5251	1.29625	31.8182	0.879303
102	49.5245	3.32917	15.0508	1.54176	36.0193	0.891161
108	55.0764	3.68502	16.0249	1.55619	38.7963	0.600982
114	62.4921	3.95311	18.4825	1.80853	44.4026	1.12948
120	65.4602	3.91865	19.3962	1.77675	47.1373	1.21821
126	71.2698	3.81061	21.667	2.05096	51.2384	1.87113
132	75.4854	3.39818	24.0241	2.24014	56.3151	1.9343

## Sheet: Fig. 1C
Time (h)	siCtrl						siMYCN_2						siMYCN_4
120	0.723824	1.09039	0.778454	0.752376	0.407823	0.211069	7.38272	7.91148	6.94115	6.57864	6.22827	6.34594	2.69869	2.45288	2.76094	2.82535	3.00827	1.98434

## Sheet: Fig. 1H
MYCN binding sites	Down-regulated genes (number)	Up-regulated genes (number)
Promoters	521	434
Enhancers	189	368

## Sheet: Fig. 1L
	siCtrl			siMYCN
NAT10	1.03532	1.03875	0.92593	0.591449	0.522818	0.528644
RRS1	0.992322	1.05201	0.955665	0.448484	0.469098	0.434268
NOP56	1.03322	0.971786	0.994993	0.645283	0.588589	0.601421
RPL5	1.02579	0.893854	1.08036	0.632594	0.599693	0.623353
RPL17	1.02098	0.901307	1.07771	0.608535	0.558664	0.591802
RPL36	1.04826	0.885895	1.06584	0.622008	0.536183	0.604303

## Sheet: Fig. 1M
	siCtrl			siMYCN
GAP43	1.01821	0.957378	1.02441	3.89502	3.79682	3.70757
UNC5C	0.91841	1.15282	0.928774	2.08757	2.08487	2.11592
NRXN1	0.937164	1.02802	1.03482	2.16795	2.1806	2.25992
MAP2	1.10876	0.991394	0.899849	1.76306	1.4352	1.4327
NTRK1	0.972416	1.02666	1.00092	1.69161	1.67082	1.8004
PLXNA2	0.994479	1.04091	0.964607	2.54155	2.56411	2.20642

## Sheet: Fig. 2D
MYCN binding sites	Down-regulated genes (number)	Up-regulated genes (number)
Promoters	56	34
Enhancers	58	221

## Sheet: Fig. 2H
	siCtrl			siMYCN
NAT10	1.0397	1.05662	0.903689	0.784751	0.698672	0.620752
RRS1	0.96375	1.02908	1.00717	0.67598	0.71367	0.733219
NOP56	1.07395	0.980067	0.945986	0.711543	0.605883	0.604348
NGDN	1.04045	0.980278	0.979268	0.76159	0.65525	0.71579
OSGEPL1	0.91609	1.07269	1.01122	0.659881	0.752674	0.701189
TSEN2	1.01922	0.978085	1.00269	0.630544	0.729126	0.671692

## Sheet: Fig. 2I
	siCtrl			siMYCN
ACTC1	1.10433	0.975261	0.920405	1.78268	1.43711	1.38528
MYOF	1.03711	0.919429	1.04346	1.62788	1.51637	1.69661
MYL4	0.999266	1.08937	0.911361	2.13567	1.72432	1.58326
SNTB1	0.955848	0.91373	1.13042	1.33534	1.51946	1.5505
MYLPF	1.01807	1.1244	0.85753	2.02442	1.74163	1.88442
MYOM1	1.00419	0.902853	1.09295	2.9598	1.87136	2.66381

## Sheet: Fig. 3A
GeneName	Fold change (siMYCN vs. siCtrl)
SLC38A5	-4.56
SLC7A2	-3.1
RAB29	-2.89
DDN	-2.96
FBN2	-2.94
TAF4B	-2.54
VCAN	-2.89
PPARGC1B	-4.29
FGFRL1	-2.86
SLC39A8	-3.04
DNAAF5	-2.32
PYGL	-5.08
SLC29A2	-2.8
UTP20	-2.2
SLCO4A1	-2.67
TBC1D4	-2.34
RRP12	-2.11
AK4	-2.3
NPM1	-2.04
RCN1	-2.32
IPO4	-2.19
PLD6	-2.29
LAMA1	-2.84
PIEZO1	-2.36
PRDM1	-4.12
WWC2	-2.18
CCDC86	-2.14
LRIG3	-3.12
RRP9	-2.21
MDFI	-2.34
SCARB1	-2.17
RPL22L1	-2.21
NPM3	-1.94
MAPKAPK3	-2.31
PAICS	-2.05
FGFR4	-2.78
NEK6	-2.43
CD3EAP	-2.48
KCNJ8	-2.06
NOP14	-2.06
DDX31	-2
PUS1	-2.19
GNL3	-2.06
MTHFD1L	-1.87
SLC25A37	-1.85
CLUH	-1.97
PRTG	-2.15
IFRD2	-2
STK26	-2.32
AEN	-2.02
AJUBA	-2.78
C1QBP	-1.84
MYBBP1A	-1.98
RPL12	-1.86
RRS1	-2.22
PNP	-1.97
PTPN13	-1.9
SMAD3	-2.75
ADAMTS20	-2.14
ATAD3B	-2.01
PRDX4	-1.86
HPDL	-2.98
DPH2	-1.88
NOC3L	-1.91
SNHG5	-1.85
CA12	-2.08
ADAMTS1	-2.95
GNPNAT1	-1.82
LDHA	-1.93
PTCHD4	-2.94
NLE1	-1.82
DHX37	-2.01
PSMG1	-1.86
TOP1MT	-1.93
LOX	-2.11
GLDC	-2.1
INHBE	-2.93
DLEU1	-2.04
PUM3	-1.78
HSPD1	-1.89
EPHA8	-2.7
PPIF	-1.91
DKC1	-1.9
GPATCH4	-1.9
MTAP	-2.19
PNO1	-1.75
LRP4	-1.99
APRT	-1.79
PCOLCE2	-2.2
TANC1	-2.05
TWNK	-1.85
DUXAP10	-1.84
METTL1	-2.01
CNNM1	-2.23
NOP2	-1.75
MRTO4	-1.82
XRCC2	-1.86
NOLC1	-1.85
NME1	-1.76
ABCC4	-1.93
NAT10	-1.83
URB2	-1.83
PLXND1	-2.17
E2F7	-1.97
LYAR	-1.95
LSG1	-1.79
CKMT1B	-1.92
SCLY	-1.93
GPM6B	-1.85
ADAT2	-1.83
EPOP	-1.9
RPL26	-1.82
WWC1	-1.98
CAD	-1.79
TAF1D	-1.72
CMSS1	-1.7
RPS6	-1.82
METTL8	-1.68
MICAL2	-2.46
WDR43	-1.78
BCAT1	-1.8
CHPT1	-1.87
DUS3L	-1.93
P4HA1	-1.99
SLC25A32	-1.76
FRAS1	-2.04
FJX1	-1.89
DIMT1	-1.67
ACAP2	-1.64
SETD6	-1.77
IGFBP4	-2.23
FAM162A	-1.86
DFFA	-1.82
USP36	-1.82
PXDN	-1.74
DDX21	-1.82
PPAT	-1.79
CRYZ	-1.7
PUS7	-1.77
POLR3E	-1.73
NDUFAF2	-1.89
DCAF4	-1.86
EXOSC5	-1.8
TRMT61A	-1.85
RPF2	-1.72
KLF15	-2.85
RPL35	-1.72
REXO2	-2.03
WDR4	-1.82
TTF2	-1.7
TMA16	-1.64
RPL17	-1.71
PPRC1	-1.82
TFAP4	-1.81
PEG10	-1.93
LPAR3	-2.31
PRMT3	-1.69
DNAJC2	-1.72
RPL36	-1.7
CHST2	-1.92
SFXN4	-1.65
CCDC88C	-1.8
ACSS1	-1.93
SLC29A1	-1.7
ATP1B3	-1.68
MAK16	-1.72
DDX55	-1.71
C19orf48	-1.66
GEMIN5	-1.8
PHLDB2	-1.61
FXN	-1.69
FAT1	-1.85
SLC25A19	-1.9
CTNNAL1	-1.66
JPH1	-2.19
SIX4	-1.68
SNHG8	-1.68
SRM	-1.74
E2F5	-1.69
TEX15	-1.85
IGSF9	-1.74
TRMT1	-1.67
ERLIN1	-1.64
NT5DC3	-1.79
STEAP3	-2.33
FYCO1	-1.79
MDN1	-1.74
NOP56	-1.63
MAP3K21	-2.67
CBS	-1.69
SIGMAR1	-1.74
HES6	-1.73
PTCD2	-1.71
SERPINF1	-1.83
RPS14	-1.65
FBL	-1.72
RPS17	-1.68
PPAN-P2RY11	-2.02
TMEM123	-1.74
NOL6	-1.74
TXN	-1.59
RAB12	-1.71
ITGB3BP	-1.72
PNPT1	-1.68
EARS2	-1.72
RPS2	-1.67
ANKS6	-1.74
NSUN2	-1.67
ZNF692	-1.73
CARNMT1	-1.7
EXOSC7	-1.62
WDR35	-1.61
LTA4H	-1.74
CHORDC1	-1.58
SERBP1	-1.71
RCC1	-1.69
POLR3D	-1.64
CIART	-2.01
CUL4A	-1.65
RPIA	-1.68
CKMT1A	-1.86
C12orf66	-1.76
TSR1	-1.68
TRAP1	-1.72
HEATR1	-1.65
RPL29	-1.62
NETO1	-1.97
RPL5	-1.62
TRABD	-1.67
DNAJC12	-1.59
GABRA5	-1.93
AKAP1	-1.65
PAM16	-1.71
NME2	-1.61
NPL	-2.59
RPL27	-1.7
ENO1	-1.77
CSPG4	-2.27
MRPL12	-1.6
SNHG15	-1.71
PA2G4	-1.74
B4GALNT3	-1.82
WDR77	-1.74
WDR46	-1.73
ELK3	-1.72
SLC25A15	-1.62
DDX10	-1.61
PMM2	-1.61
SMG1P2	-1.78
PSAT1	-1.67
RSAD1	-1.7
YDJC	-1.8
UFL1	-1.59
CTSC	-1.61
RGS10	-1.67
PGAM5	-1.71
EEF2K	-1.68
SLC43A1	-2.18
NOB1	-1.75
CYYR1	-1.66
TTLL12	-1.8
PRPS2	-1.79
NAA25	-1.59
SNHG17	-1.79
NDUFAF4	-1.58
ACTN2	-2.89
GLB1L2	-2.02
NR2F2	-1.92
C20orf27	-1.65
PDSS1	-1.71
AK2	-1.56
XPOT	-1.63
MTFP1	-1.78
PFAS	-1.65
GOLGA8A	-1.99
MTRR	-1.58
NBEAL2	-1.7
MYCL	-2.21
C15orf39	-1.92
GRWD1	-1.61
LTBP1	-2.07
NOM1	-1.56
ODC1	-1.63
PINX1	-1.6
PABPC1	-1.89
MAGOH	-1.56
THUMPD2	-1.54
RPL32	-1.54
KAT2A	-1.67
TCOF1	-1.63
ZNF814	-1.57
TTC27	-1.62
NIFK	-1.57
RPS4Y1	-1.56
MIPEP	-1.84
CDCA7L	-1.54
RPP40	-1.9
QTRT1	-1.6
CCNB1IP1	-1.55
PTRH2	-1.53
MBLAC2	-1.61
DHX33	-1.78
AMD1	-1.52
B3GALNT2	-1.55
PM20D2	-1.53
TIMM50	-1.62
RPS3A	-1.63
COQ8A	-1.63
RPS7	-1.61
RRP1	-1.6
TARBP1	-1.61
CD320	-1.73
RPL7	-1.54
NPW	-2.75
LRRC58	-1.57
GNL3L	-1.56
RSL1D1	-1.62
RPL34	-1.57
MRRF	-1.5
CCDC58	-1.56
PTX3	-1.74
EPHA2	-3.29
CEP152	-1.56
RRP1B	-1.61
PALD1	-1.58
BAK1	-1.64
TEAD4	-1.76
TMEM38B	-1.62
NUFIP1	-1.55
GRPEL1	-1.6
RREB1	-1.9
SHMT2	-1.72
MRPS23	-1.51
SLC27A2	-2.62
DNAJA3	-1.6
GPR26	-1.61
XRCC3	-1.53
TRIT1	-1.58
CDCA7	-1.51
LTV1	-1.55
SLC39A14	-1.61
UNG	-1.58
SYPL1	-1.63
QPCTL	-1.99
ANGEL1	-1.63
PKP4	-1.64
TIMM8A	-1.55
RPS10	-1.53
DUXAP8	-1.64
DHX34	-1.53
MTHFD2	-1.53
CLN6	-1.65
PSMG4	-1.75
GTF3A	-1.52
SLITRK4	-1.9
ADK	-1.51
BCCIP	-1.56
SEMA6B	-1.7
SNRPB	-1.57
CEP290	-1.54
DDX51	-1.55
GPRC5B	-2.02
POLR1C	-1.58
ABCB6	-1.57
IGDCC4	-1.63
RPS3	-1.51
RIN1	-2.54
CENPF	-1.57
ZDHHC22	-1.7
EEF1B2	-1.5
BZW2	-1.55
TXLNGY	-1.75
KLF9	-1.8
RPS8	-1.51
PPA1	-1.52
RCL1	-1.53
AIMP2	-1.54
RASL10B	-1.65
WDR74	-1.57
FKBP10	-1.62
MAP7D3	-1.53
PHB	-1.54
FARSB	-1.51
RRP7BP	-1.71
TFRC	-1.62
SLC35F2	-1.59
GTF2H2	-1.52
URB1	-1.52
MRPL3	-1.52
NFS1	-1.65
EIF5A	-1.57
PES1	-1.58
TTYH2	-1.58
GTF2H2B	-1.51
ARHGEF10	-1.51
COLGALT2	-1.82
PAXBP1	-1.52
RPL41	-1.5
HSPA9	-1.61
MRM1	-2.14
SLC45A3	-1.86
LOC100129034	-1.74
MIF	-1.53
MTHFD1	-1.56
PDF	-2.14
CHEK2	-1.5
PRSS35	-2.43
VGF	-1.75
NUDT11	-1.55
IPO5	-1.55
PRKY	-1.57
ULBP1	-1.75
CENPE	-1.59
NIP7	-1.54
COA7	-1.53
NMB	-2.18
NR2C2AP	-1.64
OAF	-2.71
NCR3LG1	-1.52
COQ3	-1.61
MRE11	-1.51
C2CD2	-1.54
GABRB2	-2.25
UBXN8	-1.59
NCKAP5	-1.88
RUVBL1	-1.52
PTDSS2	-1.54
TMEM243	-1.64
RPL3	-1.52
IARS	-1.54
NBPF8	-1.67
TXLNG	-1.53
NCL	-1.59
HSPA4L	-1.59
NHP2	-1.51
DOCK10	-1.53
TXNDC5	-1.56
WLS	-1.56
PROK2	-2.46
EBNA1BP2	-1.58
HADH	-1.5
PDIA5	-1.67
WDR3	-1.54
ALG3	-1.56
SLC16A10	-1.66
TYW3	-1.57
NEFH	-1.5
MCCC2	-1.66
HS6ST2	-1.56
ADAMTS14	-1.58
ACY1	-1.7
IKBKB	-1.51
DNPEP	-1.52
EEF1E1	-1.51
XPO5	-1.5
CDON	-1.62
IQGAP2	-2.19
MITF	-1.79
NFKB1	-1.76
STAG3	-2.16
LRIG1	-1.53
TOMM40	-1.51
AHCY	-1.55
CCKAR	-1.72
PACSIN3	-1.67
DCTPP1	-1.52
FASTKD3	-1.51
PIK3AP1	-1.96
RABEPK	-1.52
SSB	-1.52
P2RX5	-1.93
GALNT12	-1.93
SFXN2	-1.66
FZD8	-1.65
ALG8	-1.51
KATNB1	-1.52
FAM86EP	-1.99
SULF2	-1.97
TYSND1	-1.58
HRH3	-1.59
SHMT1	-1.51
TEX19	-1.95
SLC1A5	-1.66
PAX5	-1.55
EEF1G	-1.51
METAP1D	-1.67
PDP2	-1.54
ABLIM1	-1.52
MND1	-1.55
HSD11B2	-1.92
PYCR1	-1.51
GLI3	-2.06
SMIM4	-1.61
SLC2A13	-1.75
CEBPB	-1.63
FKBP4	-1.51
SIK1	-1.51
PER1	-1.56
TGIF1	-1.51
ZNF485	-1.56
SYNJ2	-1.56
BYSL	-1.51
HMBS	-1.52
L3HYPDH	-1.65
NPTX1	-1.57
TOMM34	-1.53
LOC652276	-1.52
TSPO	-1.58
OIP5	-1.51
GAR1	-1.69
COMMD8	-1.54
CRACR2A	-1.85
CNTNAP3	-2.02
ACE	-1.68
PLEKHA7	-1.61
XYLB	-1.53
BOC	-1.67
PCGF5	-1.5
AP1S3	-1.62
HHEX	-1.94
PLAGL1	-1.63
PPP2R2A	-1.53
FGFR2	-1.52
NABP1	-1.55
LINC01976	-1.58
PDE4A	-2.18
RILPL2	-1.62
RPGR	-1.52
RAPGEF4	-1.68
PVT1	-1.57
VWCE	-1.61
ZFP36L1	-2.68
NFKBIB	-1.7
CBWD3	-1.72
SNHG10	-1.52
SLC7A11	-1.66
MFNG	-2.01
CXXC4	-2.02
PABPC3	-2.05
SNHG12	-1.65
ATIC	-1.57
ARRDC2	-1.62
CYBRD1	-1.56
FUT9	-1.67
CABLES1	-1.5
STAT5A	-1.53
FAM86C2P	-1.88
RAB3IL1	-1.84
NRN1	-1.5
SNORA50C	-2.04
SLC16A6	-1.52
TBL1X	-1.51
PLPP2	-2.08
ATG9B	-1.63
IL27RA	-1.83
GRM4	-1.69
TRIM14	-1.68
SEMA5B	-1.82
NAF1	-1.65
ENDOD1	-1.66
HSPG2	-1.6
SLC1A3	-1.85
ABTB2	-1.67
KCNC4	-1.78
KCNS3	-1.59
SMIM11B	-1.59
KIF19	-1.59
CRYGD	-1.57
NOTCH3	-1.65
IL1RAP	-1.77
FIGN	-1.7
NXPH1	-1.81
LRRC10B	-1.57
NLRC5	-1.65
MRC2	-1.5
MCRIP2	-1.56
SUGCT	-1.52
CTU1	-1.5
SMCO4	-1.91
GOLGA8B	-1.51
DOC2A	-1.53
TMEM158	-1.68
MPPED1	-1.58
KCNG3	-1.6
MAP3K5	-1.52
PALM2-AKAP2	-1.61
NPIPA5	-1.66
EGLN3	-1.65
NPR3	-1.69
TCF7L1	-1.76
MRAP2	-1.62
LDB2	-1.86
POC1B-GALNT4	-2.17
BCAN	-1.71
SLC27A5	-1.55
NFKB2	-1.64
C1orf53	-1.56
TGFBR3	-1.54
NSUN5P2	-1.7
RCN3	-1.54
REP15	-1.56

## Sheet: Fig. 3B
GeneName	Fold change (siMYCN vs. siCtrl)
STMN2	20.29
RGS4	9.13
ALK	4.27
PLCL1	4.42
CNR1	3.5
ADAMTSL1	3.24
P2RX3	4.08
GAP43	3.8
NRP1	5.04
ELFN1	4.14
PLEKHA6	3.14
C11orf96	3.61
RPRM	3.61
PCDH17	2.85
SCUBE1	4.29
DUSP8	6.61
SYT11	3.61
SLC24A3	4.81
LURAP1L	9.2
PDE7B	13.78
ZNF536	2.75
SLC6A2	2.95
CHL1	3.45
SGIP1	3.16
STRA6	3.12
SCG2	3.09
L1CAM	2.98
RYR2	2.37
KIF5A	2.56
SCN5A	2.43
CD9	2.68
TCP11L2	3.27
NRXN1	2.2
JUN	3.11
TUBA1A	2.77
SAMD4A	2.98
CDH6	2.53
TMEM151B	2.55
DPP6	2.48
CELF3	2.5
TGFA	2.49
CNKSR3	2.26
DENND2A	2.38
RTN1	2.44
MGP	2.37
CNGB1	3.84
MVP	2.95
ENPP2	2.88
ELN	5.42
KCNH7	2.17
CTNNA2	2.34
PDZD7	3.48
TXNIP	2.37
SYT17	2.8
RUFY3	2.31
GAB2	2.5
DGKI	2.38
PLXNA2	2.44
CNTN1	2.83
MAP6	2.08
CLU	3.6
ZNF608	2.08
RPS6KL1	2.24
CELF4	2.42
ATP8A2	2.41
CD200	2.54
PARM1	2.3
VSTM2A	2.22
CCSER1	2.16
SRCIN1	2.41
SNAP91	2.25
ANK2	2.25
KALRN	2.05
ARVCF	2.16
CADM1	2.4
MCF2L	2.09
COL5A1	2.1
CCNG2	2.07
RET	3.7
UNC5C	2.1
LRRC55	2.19
HECW1	3.05
CLVS1	2.15
GNG2	2.17
BTBD11	2.38
NYAP1	2.63
PIK3IP1	2.51
RIN2	2.41
TIMP3	2.41
MCHR1	4.21
TNFRSF19	3.3
SYNPO	2.67
PDZD2	3
FRMD3	2.22
GARNL3	2.13
AMOTL2	2.19
DTNA	2.69
ICA1	2.29
ZMAT4	2.26
ID4	2.61
FAM214B	2.55
SEMA3C	4.39
PXDNL	2.62
CREB5	3.21
TRIM36	2.04
LRRC24	3.82
ATP1B1	2.05
HMCN2	2.17
MYT1	2.06
SOX4	2.22
NTRK3	2.23
PEG13	5.02
PCBP3	2.07
GTF2IRD2	1.97
SEZ6L	2.28
MYT1L	1.9
APC2	1.97
TSHZ2	2.61
AKAP6	2.04
MYL6	2.05
AMER3	2.07
CACNG4	2.22
CNTN2	2.11
RFTN1	2.36
PCDHAC1	2.24
ARL4D	2.09
ISLR2	2.53
TIMP2	2.46
CNTN5	2.66
LZTS3	2.48
KCND2	2.89
ASTN2	1.92
WFIKKN2	2.44
TUBB2A	2.1
FRMD6	1.97
MAPT	2.02
DSCAM	3.96
SLC4A8	2.09
CLSTN2	2.15
ABCC8	2.17
PIK3R1	2.17
THSD7A	2.34
PKIA	1.77
GABBR1	2.05
CRIP2	2.22
MAPK11	1.91
DUSP10	2.34
ST8SIA1	2.28
GTF2IRD2B	1.97
DPYSL3	2.1
BMF	1.98
ALCAM	1.78
CELF5	2.15
YPEL5	1.76
PARP6	1.86
B3GALT2	1.79
KLHL24	1.81
TRIM2	1.87
PSMG3-AS1	2.18
TRIM46	1.93
MAFB	2.58
TSPAN7	2.45
SLC43A2	2.1
RBMS3	1.84
EBF3	1.78
KCNK9	2.7
MDGA1	1.93
HRK	2.67
FGF14	2.15
NCAN	1.94
SLC10A4	2.18
TAGLN3	1.87
GSG1L	2.19
CELF6	2.16
PTPRO	1.73
RUSC2	1.95
GPR12	1.94
DOK6	1.95
GPR155	1.83
ALDH1A3	2.36
DENND6B	2.63
PLXNA4	1.93
NPR2	1.8
SNX18	1.78
TMEM130	2.33
DKK3	2.25
ADAMTS9	1.76
CSRNP3	1.81
C1QL1	1.99
PLXNC1	1.9
PNRC1	1.86
SYTL4	2.02
CHST8	1.93
RUFY2	1.66
PPP1R18	1.91
KCNK3	1.9
ZC2HC1A	1.72
UNC79	1.67
TUBB3	1.86
PTP4A3	2.05
MLLT11	1.86
C14orf132	1.8
RARB	2.07
ARHGAP23	1.86
PTPRN	1.97
PKIB	1.76
LINC02246	1.75
ST8SIA2	2.44
GOLGA7B	1.77
NATD1	1.95
WDR47	1.91
C1QL4	2.02
PLCB1	1.78
ARRDC3	1.73
CDC42EP3	1.82
REEP1	1.83
GDI1	1.88
BRINP1	1.92
TMEM108	1.78
DBH	3.02
KLHL13	2.06
NPPA	2.21
PDE4D	2.13
MAP3K13	1.73
MRAS	1.78
ELAVL4	1.73
FRMPD1	1.74
DYRK1B	1.82
PCDH1	2.69
PIK3CD	2.29
PAK3	1.77
NCOA7	1.73
ZBTB20	2.18
KAZN	2.3
ARHGAP29	1.71
RELN	2.86
OLFM3	2.29
CNGA3	1.72
NRG1	1.73
CACNB3	1.83
CDKN2D	1.97
ANK3	1.74
H19	2.71
APBA1	2.01
NHLH2	1.69
CDKN1C	1.86
RNF182	1.9
LINGO2	2.46
RXRG	1.86
P4HTM	2.43
TCAF1	1.77
ARHGDIG	1.81
SHISA6	1.95
TRIL	3.6
SAMD14	1.76
TMEM100	2.07
LRRTM2	1.72
ZSWIM8	1.71
LOC642366	1.67
DUSP4	1.84
GPRIN3	1.78
HIPK3	1.57
NDRG1	2.09
C2orf91	2.69
NDRG4	1.93
KCNB2	1.57
SYBU	1.67
CALCOCO1	1.77
SPSB4	1.74
PLPPR3	1.81
RHBDL3	1.69
FAM49A	1.88
GREB1L	1.62
CHRM2	1.91
PCBP4	1.71
IQSEC1	1.84
C15orf62	1.73
ETV1	1.69
LOC100126784	1.76
DRAXIN	1.72
ANK1	1.68
LTBP3	1.71
NREP	1.63
JAKMIP2	1.61
APH1B	1.63
RALGPS1	1.79
NYAP2	2.8
RARA-AS1	3.3
EEF1A2	1.84
RNF165	1.6
MAP3K12	1.68
XKR7	1.66
BCL2	1.79
HGSNAT	1.78
KATNAL1	1.59
TLE4	1.57
CPEB4	1.67
FMN1	1.89
WDR44	1.75
DPF3	1.64
GTF2IP1	1.68
NTRK1	1.72
CDH5	2.85
LAMA5	1.72
CHRNA3	1.71
SORCS2	1.77
ZNF627	1.56
TUBB2B	1.73
ADAMTS8	1.98
LRRC4	1.91
MFSD6	1.6
IQSEC3	2.3
RAI2	2.54
TPPP	1.64
TBC1D9	1.68
EML5	1.62
CCNA1	2.01
SLC22A15	1.59
MICAL1	1.62
RALYL	1.61
KDM5B	1.73
NHLH1	1.73
CACNA1C	1.63
COL6A2	1.69
NEUROG2	1.71
TPST1	1.63
PLEKHH3	1.74
NFASC	1.63
MEIS1-AS3	1.58
GPR173	1.59
PTPN21	1.62
KAT2B	1.95
NEDD9	1.96
KIAA1324L	1.7
DENND5B	1.63
BASP1	1.63
ITGA1	1.58
SYNE3	1.82
SCARB2	1.75
ADGRG6	1.85
ZNF423	1.68
MEIS1-AS2	1.87
GPAT4	1.65
TOM1L2	1.73
ZFP90	1.59
PDE2A	1.67
EFR3B	1.65
GFRA2	1.73
CREBRF	1.55
EML2	1.73
SERINC1	1.71
KLF10	1.64
RBFOX3	1.56
KCNN1	1.71
ISLR	2.41
KCNH1	1.53
MACROD2	2.36
MYH15	2.34
ANKFN1	1.83
ST7	1.67
NOL4L	1.83
LINC02210-CRHR1	3.07
ZNF555	1.52
RIMBP2	1.57
KLC1	1.65
NCAM2	2.2
YPEL1	1.57
TPTE2P1	1.92
ATP6V0A1	1.6
SMPD3	1.61
RHOU	1.65
GRK5	1.67
ANKS1B	1.55
PHOX2A	1.69
KIDINS220	1.59
NRXN2	1.76
SLC7A14	1.67
SEZ6	1.69
RTN4	1.6
ITM2B	1.6
C1QL3	1.71
OPN3	1.62
CYTH3	1.6
APBB3	1.64
SRRM3	1.55
LBH	1.73
MALAT1	1.76
TENM4	1.78
LPCAT3	1.56
TTL	1.6
FAM89B	1.69
JAKMIP3	2.13
ABTB1	2.38
MPPED2	1.71
MEIS3	1.61
CCNDBP1	1.56
PCMTD1	1.51
TUBA1C	1.57
ST8SIA4	1.7
AGPAT4	1.54
CCDC3	1.68
MAP3K14-AS1	2.4
TP53INP2	2.26
TMEM178B	1.63
FAM20C	1.69
KIAA1841	1.52
SHC4	1.77
CHRM1	2.05
ARL8A	1.62
CBX4	1.63
RAB39B	1.58
LYST	1.52
TBX2	1.64
ATP6V0E2	1.56
ATP2B4	1.74
GNAZ	1.63
LZTS1	1.62
SPON2	2.13
SHD	1.6
PLPPR4	1.55
KLHDC8A	1.6
MIAT	1.68
ZSWIM5	1.66
PARP9	1.73
FLRT3	1.55
LINC00693	1.98
CRABP1	1.68
APLP2	1.52
TMX4	1.52
NCAM1	1.75
KIF5C	1.6
BACH2	1.74
LIMK1	1.57
ROBO2	1.92
PRKCA	1.76
SYT1	1.64
BTG2	1.57
FAM163A	1.61
CALM1	1.57
LINC01088	1.79
MXD1	1.63
LINC00476	1.77
MTMR9	1.53
VAT1	1.69
LOC101927497	1.55
TP53I3	1.59
TPM1	1.5
ST3GAL3	1.72
TCP11L1	1.58
CXCR4	1.75
MAPK8IP3	1.54
PIM1	1.64
B4GALNT1	1.5
ADGRL1	1.58
LOC100506990	1.72
NKAIN4	1.55
MYO18A	1.53
C1QTNF4	2.03
CPE	1.64
SLC8A2	1.61
PROKR1	1.72
MVB12B	1.53
BAMBI	1.55
GABARAP	1.52
PCAT7	1.79
PLCB4	1.66
RGS17	1.64
NAGK	1.58
SUN2	1.54
CDK5R2	1.94
ATL1	1.5
S100A6	1.58
ARHGAP33	1.66
SLIT2	1.58
SOX11	1.52
ZNF34	1.64
CCND1	1.52
SNX15	1.64
ZFAND3	1.55
CASTOR2	1.54
LOXL1	1.56
LSAMP	1.5
LTBP2	1.64
C11orf95	1.52
B3GNT9	1.74
DCTN1	1.51
PAK5	1.59
APBB1	1.54
FLOT2	1.51
ANXA2	1.53
MPP3	1.59
LINC00963	1.69
CHGB	1.57
KCNJ6	1.76
MAN1A1	1.65
GADD45G	1.59
ARHGEF28	2.41
FAM167A	1.79
FGFR1	1.52
GRIN1	1.59
JUND	1.55
TSPAN18	1.51
MAP2	1.54
TOX2	1.7
SLC29A4	1.54
GAL	1.58
SCRT1	1.55
LOXL4	1.56
SLC1A4	1.54
ARHGEF2	1.53
PGF	1.57
DDC	1.66
ITPRIPL2	1.58
CPEB3	1.59
DUSP16	1.55
UBE2L6	1.52
RAB30	1.53
GRASP	1.65
NUDT18	2.1
TLX3	1.88
MOAP1	1.55
PRCD	2.01
CPEB2	1.83
ATXN1	1.57
RGS3	1.52
FSTL4	1.54
DISP2	1.53
SPTBN4	1.53
AFF3	1.55
JAK3	1.78
SECTM1	1.77
RPS6KA2	1.56
ADCYAP1	1.55
PTER	1.55
ABCG4	2.07
CHN2	1.53
SH3BP4	1.6
RAMP1	1.76
KLF7	1.52
CD248	1.52
NAV1	1.82
MAN2B2	1.51
SHC3	1.62
MAP1A	1.56
MIR137HG	1.84
PLEKHG1	2.27
LOC100130691	1.88
SLC41A2	1.61
DPYSL2	1.52
LOC101927751	1.51
ADAMTS4	1.53
NEURL1B	1.64
MAST4	1.72
BMPR2	1.54
SLC2A3	1.59
PSTPIP1	1.51
MAP1B	1.63
MYADM	1.62
OLFML3	2.02
TLE6	1.69
EFCAB2	1.57
SGCZ	1.73
SOCS3	1.93
SV2B	1.83
COL26A1	1.54
RETREG1	1.71
KCNAB2	1.93
CDH22	1.91
HS3ST4	1.67
MGAT4A	1.59
ISY1-RAB43	1.68
RTN4RL1	1.6
FLRT1	1.51
ZNF524	1.97
TRIM67	1.6
TP53TG3B	1.81
SYNGR4	1.57
JDP2	1.54
ZNF688	1.51
FBXL16	1.51
ACYP2	1.52
SLC24A2	1.57
PRSS27	1.67
ATP1A3	1.51
CABYR	1.67
TENM2	1.54
CHST15	1.54
VWA1	1.76
NAV2-AS5	1.84
KCNF1	1.61
PRR14	1.59
PNMA8B	1.57
COLEC12	1.53
DNAH1	1.68
RGMB-AS1	1.8
TBX2-AS1	1.51
FLJ20021	1.54
DSCAML1	1.64
ZNF846	1.62
WDFY3-AS2	1.54
FAM174B	1.51
SCN3B	1.5
SDCBP2-AS1	1.58
UBE2Q2P1	1.61
GRIA2	1.66
CDKL4	1.72
LOC101926908	1.8
CDK14	1.5
CHRFAM7A	1.61
THSD1	1.7
SERPINB6	1.63
C17orf82	1.62
DAND5	1.57
OLFM2	1.54
NELL1	1.63
B3GNT4	1.55
FHL5	1.76
FRAT1	1.62
LOC105373156	1.63
LINC00910	1.54
FILIP1L	1.5
TPBGL	1.64
LOC101928718	1.7

[truncated: 34 more sheets: Fig. 3C, Fig. 3D, Fig. 3E, Fig. 3F, Fig. 4G, Fig. 5B, Fig. 5C, Fig. 5D, Fig. 5E, Fig. 6B, Fig. 6C, Fig. 6E, Fig. 7C, Fig. 7D, Fig. 7E, Fig. 7F, Fig. 7G, Fig. 7H, Fig. S1B, Fig. S1C …]
