# Supplementary material for: MYCN drives oncogenesis by cooperating with the histone methyltransferase G9a and the WDR5 adaptor to orchestrate global gene transcription
Source: PLoS Biol. 2024 Mar 28;22(3):e3002240. doi: 10.1371/journal.pbio.3002240 (PMC11003700; doi:10.1371/journal.pbio.3002240)
Supplement: S1 Table — (XLSX) [file pbio.3002240.s008.xlsx]

## Sheet: siMYCN_72h_IMR32
Table S1. Genes regulated by MYCN in NB cell lines IMR32, KCNR, LAN5, SHEP and RMS cell line RH4.
Gene ID	Total counts	P-value (MYCN_siRNA2 vs. Con_siRNA)	FDR step up (MYCN_siRNA2 vs. Con_siRNA)	Ratio (MYCN_siRNA2 vs. Con_siRNA)	Fold change (MYCN_siRNA2 vs. Con_siRNA)	LSMean(MYCN_siRNA2) (MYCN_siRNA2 vs. Con_siRNA)	LSMean(Con_siRNA) (MYCN_siRNA2 vs. Con_siRNA)
STMN2	813.297	2.63506e-19	3.31543e-15	20.285	20.285	81.1445	4.00022
STMN4	199.625	5.79873e-18	3.64798e-14	10.9421	10.9421	14.2409	1.30147
RGS4	91.5288	1.56081e-16	6.54605e-13	9.13102	9.13102	13.7588	1.50682
ALK	697.883	6.45087e-16	2.02912e-12	4.27247	4.27247	162.87	38.1208
PLCL1	164.717	2.21289e-15	5.56852e-12	4.41926	4.41926	23.1727	5.24358
SLC38A5	235.731	4.64413e-15	9.73874e-12	0.219537	-4.55504	9.27573	42.2513
SCN9A	166.484	9.11024e-15	1.6375e-11	4.68627	4.68627	10.1776	2.17179
TTC9B	35.6465	1.97161e-14	3.10084e-11	8.03022	8.03022	3.34177	0.416149
OPTN	182.385	4.00787e-14	5.32758e-11	4.37198	4.37198	19.0631	4.36029
CNR1	314.289	4.23428e-14	5.32758e-11	3.49556	3.49556	25.2518	7.22396
ADAMTSL1	182.987	5.46343e-14	6.24917e-11	3.23559	3.23559	25.1168	7.76265
P2RX3	146.364	9.60049e-14	1.00661e-10	4.08054	4.08054	11.2439	2.75549
SYNGR3	57.6316	1.20241e-13	1.14384e-10	6.03141	6.03141	5.3127	0.880839
TGFB2	140.346	1.32493e-13	1.14384e-10	3.53824	3.53824	25.5903	7.23249
GAP43	829.314	1.36366e-13	1.14384e-10	3.7998	3.7998	27.5376	7.24712
NRP1	230.187	3.44175e-13	2.70651e-10	5.03874	5.03874	49.7396	9.87144
TNC	322.936	4.46051e-13	3.3013e-10	4.09944	4.09944	27.8182	6.78584
ELFN1	87.7377	5.13435e-13	3.58891e-10	4.13609	4.13609	10.1835	2.4621
CALB1	100.101	5.99982e-13	3.97314e-10	4.94538	4.94538	20.3477	4.11449
SLC7A2	226.263	6.75284e-13	4.24821e-10	0.322659	-3.09925	12.4462	38.574
PLEKHA6	771.806	9.32314e-13	5.58589e-10	3.14259	3.14259	87.5772	27.8679
C11orf96	236.203	1.16028e-12	6.63576e-10	3.61001	3.61001	24.7443	6.85436
ADGRG1	339.318	1.62482e-12	8.81136e-10	3.47252	3.47252	17.5288	5.04786
RPRM	209.695	1.68076e-12	8.81136e-10	3.61497	3.61497	6.93237	1.91768
PCDH17	162.427	2.32383e-12	1.16954e-09	2.85167	2.85167	16.127	5.65528
SH2D3C	88.9777	2.69659e-12	1.30494e-09	4.65672	4.65672	7.43689	1.59702
RAB29	111.738	3.886e-12	1.81088e-09	0.346551	-2.88558	5.81365	16.7758
SCUBE1	75.2801	4.27733e-12	1.86635e-09	4.28712	4.28712	13.5243	3.15463
DUSP8	58.185	4.30171e-12	1.86635e-09	6.60784	6.60784	3.83918	0.581005
SYT11	2436.57	4.76507e-12	1.99847e-09	3.61252	3.61252	244.997	67.8188
SLC24A3	43.7642	5.09673e-12	2.06861e-09	4.81115	4.81115	3.96407	0.823933
LURAP1L	35.5636	5.29225e-12	2.08085e-09	9.19697	9.19697	1.9428	0.211243
DDN	135.614	5.62002e-12	2.14276e-09	0.337471	-2.96322	5.15261	15.2683
FAIM2	261.191	8.99523e-12	3.32876e-09	3.52489	3.52489	25.6254	7.26984
SNAP23	51.4281	1.12523e-11	4.04504e-09	0.303189	-3.29828	2.65444	8.7551
FBN2	114.142	1.25262e-11	4.35198e-09	0.340039	-2.94084	7.13984	20.9971
PDE7B	20.5946	1.27979e-11	4.35198e-09	13.7834	13.7834	2.41509	0.175217
ZNF536	359.297	1.44047e-11	4.76946e-09	2.75032	2.75032	22.8526	8.30906
TAF4B	165.296	1.60996e-11	5.09079e-09	0.393272	-2.54277	9.319	23.6961
PPP2R5B	145.648	1.61844e-11	5.09079e-09	3.47222	3.47222	12.2884	3.53905
DCC	143.273	1.69275e-11	5.19467e-09	3.85657	3.85657	19.3942	5.02888
TTBK1	147.214	1.93676e-11	5.67778e-09	3.13704	3.13704	12.1275	3.86592
SEMA6C	193.338	1.94043e-11	5.67778e-09	2.66056	2.66056	15.4751	5.81649
SLC6A2	267.625	2.50346e-11	7.09357e-09	2.94509	2.94509	50.3497	17.0961
CHL1	104.356	2.53704e-11	7.09357e-09	3.45233	3.45233	13.5678	3.93004
HID1	24.4789	2.73317e-11	7.47581e-09	7.55606	7.55606	1.62022	0.214427
SGIP1	66.2411	3.51743e-11	9.41622e-09	3.1635	3.1635	6.21869	1.96576
STRA6	174.135	3.61095e-11	9.4652e-09	3.1166	3.1166	35.6072	11.425
ZCCHC12	43.7204	3.71496e-11	9.53911e-09	4.57314	4.57314	3.64161	0.796304
SCN3A	511.583	3.90314e-11	9.69063e-09	2.36787	2.36787	39.7764	16.7984
TP53INP1	841.484	3.97452e-11	9.69063e-09	2.58786	2.58786	92.4981	35.7431
DACT3	111.378	4.0061e-11	9.69063e-09	3.21809	3.21809	11.7591	3.65405
GPR137C	77.2197	4.08205e-11	9.69063e-09	2.72224	2.72224	7.28805	2.67722
SCG2	1563.69	4.35652e-11	1.0101e-08	3.0857	3.0857	132.391	42.9046
KIF1C	111.763	4.41545e-11	1.0101e-08	0.375622	-2.66225	7.52761	20.0404
L1CAM	1770.91	4.57811e-11	1.0286e-08	2.98301	2.98301	191.289	64.1262
RYR2	396.006	5.72201e-11	1.25346e-08	2.36961	2.36961	38.876	16.406
CADPS	89.5696	5.77814e-11	1.25346e-08	2.88592	2.88592	7.0879	2.45603
KIF5A	341.652	5.87819e-11	1.25355e-08	2.55579	2.55579	22.9846	8.99316
SMIM14	289.473	7.58891e-11	1.58376e-08	2.40296	2.40296	28.4031	11.8201
JUP	216.417	7.6855e-11	1.58376e-08	2.7597	2.7597	19.2374	6.97083
SCN5A	262.975	7.80427e-11	1.58376e-08	2.42659	2.42659	44.8371	18.4774
CD9	201.484	8.0575e-11	1.60464e-08	2.68377	2.68377	37.2179	13.8678
TCP11L2	65.2389	8.16221e-11	1.60464e-08	3.27129	3.27129	5.5141	1.68561
JAG1	101.614	8.54869e-11	1.65476e-08	3.44064	3.44064	9.95651	2.8938
VCAN	627.831	8.81638e-11	1.68072e-08	0.346177	-2.88869	32.8265	94.8258
NRXN1	524.712	9.21182e-11	1.71957e-08	2.20282	2.20282	47.633	21.6236
JUN	661.497	9.33546e-11	1.71957e-08	3.11339	3.11339	58.278	18.7185
DCX	2370.9	9.43016e-11	1.71957e-08	3.0696	3.0696	202.687	66.0304
TUBA1A	23284.8	9.67087e-11	1.73827e-08	2.76561	2.76561	2333.28	843.677
MAPK10	535.868	1.12817e-10	1.98123e-08	2.52033	2.52033	38.4149	15.242
SAMD4A	63.3872	1.13375e-10	1.98123e-08	2.97782	2.97782	8.02429	2.69469
CDH6	94.0384	1.22596e-10	2.11302e-08	2.53468	2.53468	14.7983	5.83832
PPARGC1B	26.6474	1.29086e-10	2.19481e-08	0.233118	-4.28967	1.08155	4.63948
NOP16	134.782	1.30924e-10	2.19638e-08	0.424187	-2.35745	7.8762	18.5678
TMEM151B	286.768	1.37727e-10	2.2801e-08	2.54987	2.54987	32.6899	12.8202
DPP6	165.606	1.45604e-10	2.37921e-08	2.47768	2.47768	21.7584	8.78178
CELF3	504.326	1.47779e-10	2.38379e-08	2.5015	2.5015	44.419	17.7569
TGFA	259.098	1.52194e-10	2.42392e-08	2.48607	2.48607	12.997	5.22792
PCDHA8	207.718	1.56666e-10	2.46397e-08	3.01247	3.01247	23.2359	7.71322
FGFRL1	93.539	1.76095e-10	2.72301e-08	0.35023	-2.85526	4.7876	13.6699
CNKSR3	212.513	1.79862e-10	2.72301e-08	2.26423	2.26423	39.794	17.575
DENND2A	235.344	1.81518e-10	2.72301e-08	2.38303	2.38303	24.7075	10.3681
RTN1	1145.75	1.81794e-10	2.72301e-08	2.43831	2.43831	105.068	43.0904
MGP	315.301	1.86157e-10	2.75248e-08	2.37004	2.37004	29.2084	12.324
CNGB1	34.2988	1.88137e-10	2.75248e-08	3.83924	3.83924	4.07387	1.06111
SHC2	188.414	2.04854e-10	2.96261e-08	2.52851	2.52851	14.9138	5.89824
MVP	347.588	2.23525e-10	3.1959e-08	2.95107	2.95107	39.0352	13.2275
ENPP2	311.904	2.49505e-10	3.52727e-08	2.87974	2.87974	52.0245	18.0657
SYT2	58.2261	2.55433e-10	3.57095e-08	0.303886	-3.29071	2.89386	9.52285
ELN	42.2552	2.68763e-10	3.71602e-08	5.42133	5.42133	9.06431	1.67197
SLC39A8	74.0331	2.79365e-10	3.82062e-08	0.329488	-3.03502	4.08083	12.3854
KCNH7	163.275	2.93809e-10	3.97496e-08	2.17372	2.17372	21.1837	9.74537
CTNNA2	472.882	3.73485e-10	4.99914e-08	2.34209	2.34209	48.5921	20.7473
TMEM169	438.427	3.92176e-10	5.19406e-08	2.40323	2.40323	53.5124	22.2669
PDZD7	34.889	4.04385e-10	5.29998e-08	3.47874	3.47874	2.75059	0.790684
TXNIP	1249.49	4.13932e-10	5.36917e-08	2.36939	2.36939	120.528	50.8687
SYT17	165.328	4.27402e-10	5.48731e-08	2.79781	2.79781	17.5556	6.27477
RUFY3	1000.7	4.33121e-10	5.50458e-08	2.3079	2.3079	86.416	37.4436
DNAAF5	289.734	4.48627e-10	5.62906e-08	0.431496	-2.31752	18.6706	43.2694
GAB2	205.126	4.52264e-10	5.62906e-08	2.49731	2.49731	32.9181	13.1814
DGKI	280.994	4.56338e-10	5.62906e-08	2.38498	2.38498	20.1305	8.44051
ARSF	36.294	4.74835e-10	5.80036e-08	7.54283	7.54283	1.6051	0.212798
PLXNA2	721.493	4.80805e-10	5.81682e-08	2.43736	2.43736	67.5495	27.7142
POLR3G	29.9293	5.00681e-10	5.99959e-08	0.28513	-3.50717	1.30011	4.55971
PYGL	33.4604	5.25987e-10	6.24336e-08	0.196843	-5.08018	1.26001	6.40109
CNTN1	774.094	5.66352e-10	6.65967e-08	2.82587	2.82587	142.857	50.5534
SLC29A2	61.406	6.60246e-10	7.69186e-08	0.356922	-2.80173	3.82093	10.7052
MAP6	501.951	6.9024e-10	7.96752e-08	2.08325	2.08325	35.6584	17.1167
HSPE1	1212.76	7.21764e-10	8.2245e-08	0.476888	-2.09693	80.2335	168.244
INSRR	202.138	7.25576e-10	8.2245e-08	2.27086	2.27086	25.4457	11.2053
GATS	144.182	8.06476e-10	9.00591e-08	2.20313	2.20313	12.0572	5.47276
CLU	266.901	8.08828e-10	9.00591e-08	3.60104	3.60104	27.9154	7.75202
ZNF608	524.305	8.21801e-10	9.01834e-08	2.07774	2.07774	48.744	23.4601
RPS6KL1	281.441	8.2428e-10	9.01834e-08	2.24133	2.24133	20.7049	9.23777
CELF4	103.885	8.56793e-10	9.29324e-08	2.41529	2.41529	5.9317	2.4559
ATP8A2	178.321	8.87624e-10	9.54537e-08	2.41015	2.41015	12.2747	5.09292
AHNAK	1644.5	8.96894e-10	9.56332e-08	3.35308	3.35308	375.185	111.893
UTP20	936.928	9.21332e-10	9.74134e-08	0.454825	-2.19865	62.5393	137.502
TM7SF2	96.7447	9.40971e-10	9.86608e-08	2.45547	2.45547	9.83896	4.00695
AHNAK2	225.292	9.7822e-10	1.01719e-07	2.45667	2.45667	17.5066	7.12615
SVOP	236.344	1.00289e-09	1.03429e-07	2.69804	2.69804	25.4229	9.42271
COL4A1	286.538	1.0849e-09	1.10978e-07	0.46274	-2.16104	20.4149	44.1174
GCH1	339.446	1.15127e-09	1.16816e-07	2.35844	2.35844	43.3676	18.3883
AMER2	111.439	1.21819e-09	1.22618e-07	2.19514	2.19514	11.1383	5.07405
CD200	69.3092	1.23935e-09	1.23758e-07	2.54116	2.54116	5.16313	2.0318
PARM1	346.965	1.26272e-09	1.25099e-07	2.29741	2.29741	59.7795	26.0203
VSTM2A	351.241	1.29193e-09	1.26993e-07	2.22352	2.22352	50.9878	22.9312
LOC101927267	74.0501	1.34882e-09	1.31557e-07	2.42679	2.42679	6.50098	2.67883
CCSER1	104.487	1.41493e-09	1.36943e-07	2.157	2.157	9.13383	4.23451
SRCIN1	82.6221	1.51398e-09	1.45411e-07	2.40784	2.40784	6.03336	2.50572
SNAP91	233.622	1.55412e-09	1.48136e-07	2.24895	2.24895	22.5448	10.0246
BDKRB2	43.8278	1.58917e-09	1.48192e-07	3.97591	3.97591	5.4971	1.3826
SLCO4A1	74.9387	1.59373e-09	1.48192e-07	0.374359	-2.67123	3.49215	9.32834
ANK2	3421.95	1.59519e-09	1.48192e-07	2.24602	2.24602	269.113	119.818
TBC1D4	140.853	1.60182e-09	1.48192e-07	0.427487	-2.33925	8.57177	20.0515
KALRN	750.981	1.77457e-09	1.62975e-07	2.05216	2.05216	48.8688	23.8134
RRP12	370.07	1.86404e-09	1.69952e-07	0.473948	-2.10994	22.4425	47.3523
NACAD	241.053	1.87987e-09	1.70162e-07	2.7186	2.7186	21.2144	7.80341
ARVCF	220.695	1.98018e-09	1.77157e-07	2.15622	2.15622	22.8415	10.5933
SIX5	33.7515	1.98531e-09	1.77157e-07	0.278257	-3.5938	1.58302	5.68904
CADM1	475.021	2.0664e-09	1.83094e-07	2.39936	2.39936	57.7873	24.0845
FAM131B	242.376	2.18893e-09	1.92595e-07	2.31273	2.31273	20.4401	8.83805
RHOC	461.686	2.30643e-09	2.01003e-07	2.45424	2.45424	55.5934	22.652
SDC2	209.604	2.34342e-09	2.01003e-07	2.21964	2.21964	39.552	17.8191
SORBS2	82.2135	2.34403e-09	2.01003e-07	2.4822	2.4822	4.63315	1.86655
CEMIP	34.6959	2.35749e-09	2.01003e-07	4.03519	4.03519	7.01484	1.73842
AK4	238.443	2.36436e-09	2.01003e-07	0.434636	-2.30078	17.7707	40.8865
NPM1	13592	2.41182e-09	2.03661e-07	0.491174	-2.03594	861.021	1752.98
MCF2L	375.412	2.44725e-09	2.04083e-07	2.08593	2.08593	29.7397	14.2573
COL5A1	955.567	2.44937e-09	2.04083e-07	2.10154	2.10154	85.4938	40.6815
RCN1	420.379	2.46547e-09	2.04083e-07	0.430642	-2.32212	24.4665	56.8141
IPO4	420.085	2.57362e-09	2.11642e-07	0.456013	-2.19292	25.409	55.72
CCNG2	329.278	2.62264e-09	2.14273e-07	2.07019	2.07019	29.4646	14.2328
RET	29.7449	2.74428e-09	2.22765e-07	3.69847	3.69847	5.92471	1.60194
UNC5C	322.854	2.95384e-09	2.36904e-07	2.09612	2.09612	50.4615	24.0738
PLD6	216.027	2.95612e-09	2.36904e-07	0.437084	-2.28789	12.6525	28.9475
LRRC55	403.836	3.10621e-09	2.47357e-07	2.19467	2.19467	21.5915	9.83812
HECW1	34.2446	3.19342e-09	2.52702e-07	3.05363	3.05363	2.41251	0.790047
LAMA1	63.7034	3.37377e-09	2.65304e-07	0.35256	-2.83639	3.80598	10.7952
PIEZO1	149.261	3.43406e-09	2.68369e-07	0.424411	-2.35621	9.76462	23.0075
CLVS1	175.27	3.58097e-09	2.78122e-07	2.15139	2.15139	16.2777	7.56612
PRDM1	27.5607	3.78106e-09	2.91861e-07	0.242901	-4.11691	0.510716	2.10257
PRPH	1376.98	3.88891e-09	2.98355e-07	2.55504	2.55504	144.578	56.5853
GNG2	393.252	3.97195e-09	3.02702e-07	2.16924	2.16924	42.6641	19.6677
WWC2	84.9518	3.99368e-09	3.02702e-07	0.459014	-2.17858	5.62882	12.2628
BTBD11	979.093	4.05286e-09	3.05348e-07	2.38367	2.38367	72.3311	30.3445
NYAP1	91.7992	4.14392e-09	3.08744e-07	2.6299	2.6299	6.70245	2.54856
EPPK1	30.6953	4.14701e-09	3.08744e-07	4.43426	4.43426	1.29797	0.292715
B3GNT8	16.9441	4.20474e-09	3.112e-07	3.74627	3.74627	2.0249	0.540511
FAM84B	67.6151	4.287e-09	3.15433e-07	0.380057	-2.63118	2.95602	7.77783
CCDC86	141.447	4.31592e-09	3.15714e-07	0.466361	-2.14426	9.55151	20.4809
LRIG3	59.1191	4.52542e-09	3.29126e-07	0.320677	-3.1184	3.79342	11.8294
PTPRN2	199.393	4.58676e-09	3.31671e-07	2.18845	2.18845	21.3103	9.73763
PMEL	349.003	4.61433e-09	3.31757e-07	2.51504	2.51504	31.4404	12.501
RRP9	297.399	4.69221e-09	3.3544e-07	0.451966	-2.21256	18.7624	41.5129
PIK3IP1	70.1982	4.78894e-09	3.4042e-07	2.50714	2.50714	5.70085	2.27385
MDFI	123.259	4.85131e-09	3.42917e-07	0.427809	-2.33749	7.83322	18.3101
RIN2	70.0856	4.89202e-09	3.43863e-07	2.4073	2.4073	6.39879	2.65808
TIMP3	1086.12	4.93565e-09	3.45002e-07	2.40967	2.40967	150.443	62.433
SCARB1	273.571	5.26855e-09	3.66237e-07	0.460984	-2.16927	17.8614	38.7462
MCHR1	36.8041	5.52324e-09	3.81832e-07	4.20673	4.20673	5.78356	1.37484
TNFRSF19	30.8413	5.79604e-09	3.98501e-07	3.30479	3.30479	3.9034	1.18114
RPL22L1	867.064	6.09184e-09	4.16563e-07	0.45282	-2.20838	55.7343	123.083
SYNPO	66.3818	6.16816e-09	4.19501e-07	2.67434	2.67434	7.91937	2.96124
EYS	442.484	6.40246e-09	4.32666e-07	2.13242	2.13242	33.1842	15.5617
PDZD2	55.1339	6.4305e-09	4.32666e-07	2.99535	2.99535	9.4181	3.14424
AKR1C1	21.3804	6.64357e-09	4.44624e-07	4.94184	4.94184	1.24254	0.251432
FRMD3	128.953	6.70888e-09	4.4662e-07	2.21872	2.21872	5.29505	2.38653
ATCAY	1238.95	6.9084e-09	4.57481e-07	2.25783	2.25783	119.999	53.1477
GARNL3	171.212	7.03896e-09	4.63687e-07	2.12602	2.12602	18.9056	8.8925
NPM3	218.943	7.10901e-09	4.65431e-07	0.516346	-1.93669	15.151	29.3427
CHRDL1	84.2998	7.13943e-09	4.65431e-07	0.419641	-2.38299	4.75352	11.3276
AMOTL2	357.049	7.25079e-09	4.70255e-07	2.18554	2.18554	29.738	13.6067
MAPKAPK3	146.971	7.30558e-09	4.71379e-07	0.433091	-2.30899	9.22523	21.3009
DTNA	77.6136	7.42223e-09	4.76462e-07	2.6938	2.6938	8.25033	3.06271
ICA1	102.657	7.6026e-09	4.83606e-07	2.28513	2.28513	17.027	7.45119
DDAH2	604.647	7.61039e-09	4.83606e-07	2.19469	2.19469	69.5688	31.6987
ZMAT4	100.059	7.80081e-09	4.93215e-07	2.25854	2.25854	7.41156	3.28156
PAICS	1840.84	8.02354e-09	5.02399e-07	0.487839	-2.04986	128.228	262.849
ID4	73.4852	8.02592e-09	5.02399e-07	2.60732	2.60732	3.89952	1.4956
FAM214B	50.3559	8.07209e-09	5.02787e-07	2.55425	2.55425	4.69128	1.83666
FGFR4	33.9232	8.20624e-09	5.06514e-07	0.359719	-2.77994	1.71751	4.77459
SEMA3C	36.0088	8.21244e-09	5.06514e-07	4.392	4.392	0.76573	0.174347
ABCA7	50.2864	8.56912e-09	5.25935e-07	2.47395	2.47395	5.76848	2.33168
PXDNL	45.6322	8.62048e-09	5.26519e-07	2.62373	2.62373	8.3442	3.18029
RAB6B	502.758	9.00094e-09	5.47101e-07	2.14313	2.14313	35.4135	16.5242
CREB5	96.1397	9.28608e-09	5.61718e-07	3.21205	3.21205	4.30279	1.33958
NEK6	64.1453	9.4046e-09	5.66166e-07	0.411211	-2.43184	3.54395	8.61832
TRIM36	218.235	9.5711e-09	5.73446e-07	2.03697	2.03697	22.538	11.0645
CD3EAP	64.0221	9.61879e-09	5.73572e-07	0.402905	-2.48197	3.74558	9.29642
LRRC24	29.0546	9.93854e-09	5.89843e-07	3.82255	3.82255	3.41651	0.893779
KCNJ8	134.993	9.99504e-09	5.90411e-07	0.484578	-2.06365	10.9064	22.507
ATP1B1	1807.89	1.02079e-08	6.00164e-07	2.05355	2.05355	274.304	133.576
HMCN2	113.798	1.05593e-08	6.17938e-07	2.16898	2.16898	12.0185	5.54108
MYT1	566.154	1.07563e-08	6.26553e-07	2.05753	2.05753	36.8152	17.8929
SOX4	2682.08	1.10012e-08	6.37868e-07	2.21595	2.21595	249.144	112.432
NTRK3	78.7124	1.19162e-08	6.87751e-07	2.23024	2.23024	3.51528	1.57619
NOP14	472.851	1.21566e-08	6.98422e-07	0.484712	-2.06308	29.6611	61.1934
DDX31	203.718	1.23254e-08	7.04899e-07	0.499065	-2.00375	13.5398	27.1304
PEG13	21.6605	1.2489e-08	7.11024e-07	5.02351	5.02351	1.59651	0.317808
CLIP2	311.814	1.35371e-08	7.67226e-07	2.18123	2.18123	27.5788	12.6437
PUS1	109.331	1.36717e-08	7.71376e-07	0.455867	-2.19362	7.12868	15.6376
GNL3	921.631	1.40956e-08	7.91745e-07	0.485439	-2.05999	58.2087	119.91
RAB3B	514.081	1.50696e-08	8.42692e-07	2.3232	2.3232	48.6431	20.938
REST	122.24	1.6644e-08	9.26612e-07	0.419538	-2.38357	9.47185	22.5768
MTHFD1L	355.982	1.67985e-08	9.31095e-07	0.533772	-1.87346	25.6711	48.0939
PCBP3	161.378	1.69859e-08	9.37354e-07	2.07227	2.07227	19.4502	9.38594
SLC25A37	136.683	1.74922e-08	9.61077e-07	0.540538	-1.85001	9.33993	17.279
FAM219A	229.301	1.77268e-08	9.69735e-07	2.09011	2.09011	24.1961	11.5765
GTF2IRD2	195.999	1.79008e-08	9.71276e-07	1.9661	1.9661	21.0914	10.7275
CLUH	407.614	1.79519e-08	9.71276e-07	0.506817	-1.9731	26.726	52.733
SEZ6L	2428.8	1.79866e-08	9.71276e-07	2.28065	2.28065	251.394	110.229
MYT1L	265.859	1.91466e-08	1.02867e-06	1.89741	1.89741	21.2973	11.2244
PRTG	137.815	1.92686e-08	1.02867e-06	0.465448	-2.14847	7.35356	15.7989
IFRD2	219.042	1.92947e-08	1.02867e-06	0.499094	-2.00363	16.5936	33.2474
APC2	546.033	2.0246e-08	1.07483e-06	1.97019	1.97019	44.7137	22.6951
STK26	60.0044	2.04695e-08	1.08213e-06	0.431818	-2.31579	3.93238	9.10657
TSHZ2	47.0119	2.06609e-08	1.08768e-06	2.60947	2.60947	3.98152	1.5258
AKAP6	290.244	2.07762e-08	1.08919e-06	2.04368	2.04368	17.2185	8.42521
DAAM2	60.0974	2.1542e-08	1.12465e-06	0.429259	-2.3296	4.43752	10.3376
TGFB1I1	100.613	2.21731e-08	1.15231e-06	2.32971	2.32971	11.4152	4.89982
MYL6	3156.28	2.22548e-08	1.15231e-06	2.05191	2.05191	360.74	175.807
AEN	590.537	2.25168e-08	1.16109e-06	0.49598	-2.01621	41.4876	83.6477
AMER3	889.392	2.295e-08	1.1786e-06	2.06662	2.06662	131.135	63.4541
CACNG4	391.868	2.37708e-08	1.21186e-06	2.22126	2.22126	39.6769	17.8623
CNTN2	4555.1	2.37902e-08	1.21186e-06	2.11074	2.11074	204.081	96.6873
RFTN1	123.447	2.39015e-08	1.21262e-06	2.35805	2.35805	21.5761	9.14995
AJUBA	35.3121	2.40585e-08	1.21568e-06	0.359364	-2.78269	1.87407	5.21495
ZNF436	293.589	2.4419e-08	1.22896e-06	2.08942	2.08942	29.8618	14.2919
C1QBP	1416.32	2.46193e-08	1.23411e-06	0.54241	-1.84362	97.457	179.674
PCDHAC1	127.393	2.47377e-08	1.23512e-06	2.24498	2.24498	15.3041	6.81702
MYBBP1A	475.299	2.62959e-08	1.30773e-06	0.504406	-1.98253	30.706	60.8756
RPL12	7044.95	2.69201e-08	1.3335e-06	0.538019	-1.85867	391.691	728.024
TENM1	68.9952	2.75877e-08	1.36121e-06	2.22919	2.22919	3.84277	1.72384
RRS1	140.668	2.78398e-08	1.36828e-06	0.450616	-2.21918	9.27732	20.5881
PNP	343.891	2.94971e-08	1.44409e-06	0.506402	-1.97472	24.8422	49.0563
RIDA	111.764	2.9761e-08	1.45137e-06	0.523858	-1.90891	7.94487	15.1661
ARL4D	772.9	3.16859e-08	1.53927e-06	2.09393	2.09393	87.0344	41.5651
RPS18	11384.9	3.24457e-08	1.57012e-06	0.515161	-1.94114	633.292	1229.31
2022-03-02	50.6095	3.34259e-08	1.61136e-06	2.42831	2.42831	5.24058	2.15812
SERINC2	119.326	3.36787e-08	1.61372e-06	2.31474	2.31474	14.0906	6.08733
PTPN13	359.101	3.37485e-08	1.61372e-06	0.527367	-1.89621	25.389	48.1429
SMAD3	67.0832	3.38596e-08	1.61372e-06	0.362988	-2.75491	4.61621	12.7173
ADAMTS20	65.5913	3.6594e-08	1.73745e-06	0.467239	-2.14023	3.98623	8.53144
ISLR2	404.19	3.68918e-08	1.74197e-06	2.52736	2.52736	62.0595	24.5551
CEND1	70.115	3.6966e-08	1.74197e-06	2.22267	2.22267	5.25729	2.36531
TIMP2	3390	4.03581e-08	1.89472e-06	2.46237	2.46237	358.737	145.688
CNTN5	34.8093	4.12665e-08	1.92347e-06	2.66377	2.66377	5.63561	2.11565
LOC283731	187.361	4.12763e-08	1.92347e-06	2.22487	2.22487	25.9856	11.6796
LZTS3	80.7511	4.18459e-08	1.94282e-06	2.4759	2.4759	7.89816	3.19001
ATAD3B	75.1825	4.22526e-08	1.94491e-06	0.497568	-2.00978	4.61395	9.27301
PTGFR	81.965	4.2344e-08	1.94491e-06	2.92445	2.92445	19.1086	6.53409
KCND2	35.4357	4.23546e-08	1.94491e-06	2.89071	2.89071	3.29479	1.13978
PRDX4	652.32	4.44337e-08	2.03296e-06	0.539003	-1.85528	48.688	90.3297
HPDL	43.7868	4.57033e-08	2.08347e-06	0.336024	-2.97598	2.72112	8.09799
ASTN2	663.147	4.61848e-08	2.09603e-06	1.91681	1.91681	58.7351	30.642
ATP6V1G2	67.275	4.64478e-08	2.09603e-06	2.46663	2.46663	7.38017	2.992
WFIKKN2	822.51	4.64786e-08	2.09603e-06	2.44074	2.44074	96.4846	39.5309
ECE2	64.6247	4.66662e-08	2.09698e-06	0.416355	-2.4018	3.83025	9.19948
DPH2	142.887	4.95549e-08	2.21886e-06	0.530688	-1.88435	9.47977	17.8632
MAOA	361.35	5.03231e-08	2.24526e-06	2.36408	2.36408	60.2426	25.4824
TUBB2A	1269.69	5.07629e-08	2.25689e-06	2.1039	2.1039	134.5	63.9289
FRMD6	691.502	5.14373e-08	2.27166e-06	1.96945	1.96945	89.31	45.3477
LOC728392	161.909	5.14563e-08	2.27166e-06	2.00728	2.00728	16.682	8.31075
NOC3L	387.811	5.19295e-08	2.28453e-06	0.522449	-1.91406	27.3271	52.3058
S1PR1	25.7691	5.21516e-08	2.28631e-06	3.11141	3.11141	2.55875	0.822378
SNHG5	324.89	5.2574e-08	2.29151e-06	0.540366	-1.8506	17.4682	32.3267
MAPT	268.117	5.26988e-08	2.29151e-06	2.02045	2.02045	15.7179	7.7794
DSCAM	19.4948	5.28166e-08	2.29151e-06	3.95787	3.95787	4.21172	1.06414
SFXN3	240.644	5.32685e-08	2.30318e-06	2.19226	2.19226	24.8305	11.3264
CA12	169.037	5.69947e-08	2.45585e-06	0.480927	-2.07932	10.2935	21.4035
ADAMTS1	38.0741	5.73469e-08	2.46259e-06	0.339054	-2.94938	2.36614	6.97865
PHACTR3	29.0777	5.95456e-08	2.54613e-06	4.8461	4.8461	1.26074	0.260156
GNPNAT1	206.608	5.96971e-08	2.54613e-06	0.550716	-1.81582	15.6698	28.4535
SLC4A8	1048.43	6.09334e-08	2.59008e-06	2.09049	2.09049	135.439	64.7884
CLSTN2	192.427	6.13162e-08	2.59758e-06	2.14882	2.14882	12.1768	5.66674
LRRN3	47.1652	6.16327e-08	2.60222e-06	3.4613	3.4613	11.0488	3.19209
KLHDC8B	98.1946	6.24622e-08	2.62843e-06	2.09585	2.09585	11.1834	5.33596
TMEM35A	174.368	6.30054e-08	2.63718e-06	2.10856	2.10856	17.9721	8.5234
LDHA	4120.84	6.30895e-08	2.63718e-06	0.517522	-1.93228	319.895	618.129
ABCC8	77.691	6.35335e-08	2.64695e-06	2.16992	2.16992	8.69278	4.00604
PTCHD4	30.8177	6.45147e-08	2.67896e-06	0.340088	-2.94042	1.83621	5.39921
NLE1	179.74	6.50506e-08	2.69149e-06	0.549116	-1.82111	11.9301	21.726
DHX37	330.798	6.52444e-08	2.69149e-06	0.497926	-2.00833	22.3776	44.9416
PIK3R1	240.621	6.56145e-08	2.69342e-06	2.17389	2.17389	23.3319	10.7328
THSD7A	53.3702	6.57193e-08	2.69342e-06	2.3371	2.3371	9.07464	3.88286
ZFYVE1	185.367	6.6619e-08	2.72143e-06	2.09726	2.09726	17.0797	8.14382
MAPK8IP1	709.121	6.85899e-08	2.79028e-06	2.17292	2.17292	59.8431	27.5404
PKIA	930.289	6.87481e-08	2.79028e-06	1.76907	1.76907	89.5751	50.634
PSMG1	185.612	7.15614e-08	2.89513e-06	0.538102	-1.85838	14.3808	26.7251
PCSK1N	218.029	7.52328e-08	3.03391e-06	2.22659	2.22659	26.3584	11.838
GABBR1	79.1974	7.70425e-08	3.08772e-06	2.05365	2.05365	6.24125	3.0391
TOP1MT	93.5684	7.7058e-08	3.08772e-06	0.519312	-1.92562	6.43683	12.3949
SNHG3	169.73	7.74977e-08	3.09548e-06	0.524305	-1.90729	11.1147	21.199
DOC2B	58.8569	7.96492e-08	3.17135e-06	2.20986	2.20986	9.03824	4.08995
LOX	120.592	8.13791e-08	3.23001e-06	0.474803	-2.10614	5.33983	11.2464
FNDC5	665.744	8.22095e-08	3.2527e-06	1.82336	1.82336	58.703	32.195
CRIP2	162.873	8.27267e-08	3.26291e-06	2.21883	2.21883	14.4996	6.5348
GLDC	192.193	8.48379e-08	3.33572e-06	0.476381	-2.09916	9.68432	20.3289
MAPK11	111.136	8.65615e-08	3.39289e-06	1.91238	1.91238	10.9464	5.72398
PPAN	206.576	8.68589e-08	3.39397e-06	0.559558	-1.78712	14.2793	25.5189
EBF4	34.7504	8.80398e-08	3.42946e-06	2.70447	2.70447	4.75483	1.75814
DUSP10	121.631	8.92456e-08	3.4657e-06	2.34373	2.34373	11.519	4.9148
ST8SIA1	66.9233	8.98042e-08	3.47667e-06	2.28085	2.28085	4.69906	2.06022
GTF2IRD2B	97.5726	9.11962e-08	3.51972e-06	1.97174	1.97174	10.3782	5.2635
DPYSL3	2115.02	9.4407e-08	3.63251e-06	2.10101	2.10101	167.283	79.6204
BMF	144.559	9.61325e-08	3.68762e-06	1.9798	1.9798	13.2117	6.67325
ALCAM	772.854	9.71564e-08	3.71557e-06	1.77724	1.77724	42.8373	24.1032
INHBE	26.6912	9.99948e-08	3.81253e-06	0.340923	-2.93322	1.11061	3.25766
CELF5	102.991	1.01184e-07	3.84622e-06	2.14986	2.14986	7.04847	3.27856
YPEL5	419.297	1.03683e-07	3.92933e-06	1.76158	1.76158	35.4674	20.1338
PARP6	846.652	1.04255e-07	3.93915e-06	1.85676	1.85676	83.5938	45.0213
SULT4A1	83.7149	1.0647e-07	4.00257e-06	2.03276	2.03276	7.94493	3.90845
DLEU1	73.9007	1.06687e-07	4.00257e-06	0.491012	-2.03661	4.9742	10.1305
B3GALT2	335.873	1.06888e-07	4.00257e-06	1.79116	1.79116	23.2684	12.9907
SELENOW	401.182	1.10654e-07	4.13129e-06	1.75467	1.75467	37.4997	21.3713
PREX2	32.8951	1.12596e-07	4.19138e-06	0.358583	-2.78876	1.74008	4.85265
KLHL24	1596.6	1.12984e-07	4.1934e-06	1.80889	1.80889	116.475	64.3907
PUM3	352.076	1.15758e-07	4.28371e-06	0.561756	-1.78013	25.1061	44.6921
TRIM2	836.148	1.16206e-07	4.28769e-06	1.86986	1.86986	74.8013	40.0037
PSMG3-AS1	80.6482	1.22203e-07	4.49578e-06	2.1757	2.1757	8.03995	3.69534
ARFGEF3	19.7235	1.24892e-07	4.5813e-06	3.17327	3.17327	1.22123	0.384848
PGPEP1	70.8149	1.25704e-07	4.59771e-06	2.12582	2.12582	5.3309	2.50769
HSPD1	7376.96	1.28233e-07	4.63964e-06	0.529072	-1.8901	520.208	983.247
EPHA8	39.4201	1.28311e-07	4.63964e-06	0.369858	-2.70374	0.4458	1.20533
MMP15	180.127	1.28751e-07	4.63964e-06	2.17207	2.17207	20.6326	9.49905
TRIM46	96.6451	1.29006e-07	4.63964e-06	1.92511	1.92511	8.18521	4.25181
MAFB	41.7186	1.29059e-07	4.63964e-06	2.58361	2.58361	5.46211	2.11413
PPIF	556.614	1.29063e-07	4.63964e-06	0.524605	-1.9062	38.34	73.0836
TSPAN7	333.362	1.30522e-07	4.6787e-06	2.45182	2.45182	36.3294	14.8173
DKC1	823.392	1.35593e-07	4.84668e-06	0.525542	-1.9028	57.6167	109.633
GPATCH4	309.164	1.38594e-07	4.93983e-06	0.527249	-1.89664	21.4872	40.7533
MTAP	196.051	1.38984e-07	4.93983e-06	0.457156	-2.18744	15.4481	33.7918
SLC43A2	191.283	1.39434e-07	4.94186e-06	2.10192	2.10192	17.4675	8.31028
PNO1	416.612	1.40428e-07	4.9631e-06	0.571368	-1.75019	29.5071	51.6429
LRP4	165.128	1.42642e-07	5.02723e-06	0.501689	-1.99327	11.0907	22.1067
C10orf10	15.9157	1.43664e-07	5.04912e-06	3.42624	3.42624	1.33629	0.390016
RBMS3	1866.69	1.46662e-07	5.14013e-06	1.84404	1.84404	213.875	115.982
APRT	253.475	1.53359e-07	5.33605e-06	0.560171	-1.78517	16.2023	28.9239
SDCCAG3	218.004	1.53523e-07	5.33605e-06	0.546302	-1.83049	14.5575	26.6473
PPEF1	115.582	1.53525e-07	5.33605e-06	0.488539	-2.04692	6.30286	12.9014
MYO19	167.635	1.55298e-07	5.38281e-06	0.56933	-1.75645	12.86	22.5879
PCOLCE2	73.1308	1.58254e-07	5.45584e-06	0.45535	-2.19611	4.83849	10.6259
EBF3	1984.26	1.58272e-07	5.45584e-06	1.78109	1.78109	186.687	104.816
KCNK9	33.4944	1.59402e-07	5.47978e-06	2.7039	2.7039	1.93012	0.713829
TANC1	150.55	1.61357e-07	5.53072e-06	0.488697	-2.04626	10.8356	22.1724
TWNK	322.579	1.61763e-07	5.53072e-06	0.539381	-1.85398	20.9119	38.7701
DUXAP10	139.562	1.62685e-07	5.54717e-06	0.54411	-1.83786	8.61503	15.8332
MDGA1	103.898	1.65563e-07	5.63004e-06	1.93095	1.93095	9.48233	4.91071
METTL1	69.6106	1.71416e-07	5.81334e-06	0.498068	-2.00776	4.82998	9.69744
TPPP3	34.7756	1.7976e-07	6.07994e-06	2.70919	2.70919	2.52794	0.933095
APLP1	608.529	1.8071e-07	6.09568e-06	2.0343	2.0343	67.1174	32.993
HRK	52.8646	1.82744e-07	6.1478e-06	2.66784	2.66784	5.31466	1.99212
CNNM1	102.525	1.8361e-07	6.16049e-06	0.448935	-2.22749	6.3633	14.1742
SNPH	59.3276	1.84996e-07	6.19047e-06	2.10623	2.10623	7.0792	3.36108
FGF14	77.7517	1.87129e-07	6.24525e-06	2.15226	2.15226	9.38276	4.3595
NOP2	383.718	1.88581e-07	6.27704e-06	0.569902	-1.75469	27.2927	47.8901
MRTO4	220.815	1.91627e-07	6.3616e-06	0.549824	-1.81877	16.0176	29.1322
XRCC2	140.163	1.92317e-07	6.36773e-06	0.537475	-1.86055	11.4307	21.2675
NOLC1	1770.39	1.93583e-07	6.3928e-06	0.540054	-1.85167	121.352	224.704
MAGED4	341.283	1.94202e-07	6.39646e-06	1.96809	1.96809	37.1745	18.8886
MAGED4B	348.46	1.97652e-07	6.4931e-06	1.96706	1.96706	37.9558	19.2957
NME1	3814.04	1.98619e-07	6.50786e-06	0.569163	-1.75697	275.192	483.503
PCDHB9	65.8685	2.00968e-07	6.56775e-06	1.94281	1.94281	5.53226	2.84755
RTN2	351.439	2.04698e-07	6.6723e-06	1.92751	1.92751	35.7275	18.5356
NCAN	663.522	2.10251e-07	6.83561e-06	1.93517	1.93517	63.5346	32.8316
ABCC4	425.547	2.18159e-07	7.07442e-06	0.518987	-1.92683	26.0738	50.2397
SLC10A4	115.791	2.22375e-07	7.18561e-06	2.1813	2.1813	15.9852	7.32827
NAT10	481.865	2.22879e-07	7.18561e-06	0.547637	-1.82603	33.221	60.6624
URB2	692.803	2.23301e-07	7.18561e-06	0.547776	-1.82557	50.0943	91.4504
PLXND1	241.842	2.2439e-07	7.20223e-06	0.460604	-2.17106	15.3081	33.2349
E2F7	183.883	2.27083e-07	7.25788e-06	0.507646	-1.96988	14.7223	29.0012
TAGLN3	1094.94	2.27277e-07	7.25788e-06	1.87068	1.87068	70.6358	37.7595
GSG1L	49.7926	2.27897e-07	7.25924e-06	2.18553	2.18553	8.82891	4.03971
LYAR	143.383	2.28837e-07	7.27077e-06	0.514043	-1.94536	10.3462	20.1271
CELF6	57.9229	2.30002e-07	7.28937e-06	2.16221	2.16221	6.133	2.83645
NUDT10	58.6282	2.32519e-07	7.35063e-06	0.468201	-2.13583	3.15042	6.72878
PTPRO	565.557	2.36128e-07	7.44193e-06	1.72734	1.72734	44.5437	25.7875
GLRX	134.207	2.3659e-07	7.44193e-06	1.78157	1.78157	12.0906	6.78648
GCHFR	254.634	2.37287e-07	7.44524e-06	1.80784	1.80784	40.2471	22.2625
MEG3	361.757	2.40077e-07	7.51404e-06	2.19968	2.19968	10.4053	4.73035
HMP19	216.151	2.49565e-07	7.79163e-06	1.90483	1.90483	15.8437	8.31762
RUSC2	457.481	2.50773e-07	7.79456e-06	1.94692	1.94692	37.8911	19.4621
LSG1	325.102	2.51458e-07	7.79456e-06	0.557496	-1.79374	23.9913	43.034
UBE2H	510.6	2.51517e-07	7.79456e-06	1.92366	1.92366	49.1371	25.5435
GPR12	79.2615	2.54566e-07	7.86914e-06	1.93692	1.93692	9.15675	4.72748
SLC19A3	21.0481	2.55175e-07	7.86914e-06	0.313818	-3.18656	1.03327	3.29257
DOK6	186.532	2.56444e-07	7.88895e-06	1.95312	1.95312	16.8163	8.61
PSTPIP2	62.4737	2.59642e-07	7.96785e-06	0.44479	-2.24825	4.03728	9.07683
CKMT1B	352.763	2.61887e-07	8.01719e-06	0.521413	-1.91787	23.4738	45.0197
SCLY	161.524	2.62546e-07	8.01785e-06	0.519068	-1.92653	11.6758	22.4939
GPR155	153.581	2.63337e-07	8.02254e-06	1.82942	1.82942	18.3647	10.0385
PCDHB10	64.1919	2.68415e-07	8.15749e-06	2.12569	2.12569	6.07352	2.85719
GPM6B	114.051	2.74392e-07	8.31904e-06	0.540233	-1.85105	7.05859	13.0658
ADAT2	124.801	2.76641e-07	8.36706e-06	0.545133	-1.83442	8.48592	15.5667
EPOP	145.588	2.77541e-07	8.37415e-06	0.52755	-1.89556	9.64362	18.28
RPL26	7189.33	2.78969e-07	8.39711e-06	0.550437	-1.81674	397.928	722.931
FRMPD3	74.9541	2.81668e-07	8.42847e-06	2.36792	2.36792	4.83609	2.04234
SOS2	447.097	2.81845e-07	8.42847e-06	1.72057	1.72057	47.2417	27.457
COL14A1	27.0454	2.82021e-07	8.42847e-06	0.325123	-3.07576	1.89522	5.82924
NAPB	299.659	2.83515e-07	8.42987e-06	1.81266	1.81266	24.9459	13.7621
ALDH1A3	77.72	2.83799e-07	8.42987e-06	2.36051	2.36051	9.14654	3.87481
DENND6B	22.9237	2.84078e-07	8.42987e-06	2.63162	2.63162	2.6775	1.01744
PLXNA4	290.576	2.90705e-07	8.60623e-06	1.92652	1.92652	31.6962	16.4526
NPR2	342.925	2.92922e-07	8.65152e-06	1.7953	1.7953	30.5097	16.9942
SNX18	1089.33	2.94452e-07	8.66534e-06	1.77659	1.77659	106.057	59.6973
WWC1	158.644	2.94768e-07	8.66534e-06	0.503831	-1.98479	11.3323	22.4922
TMEM130	54.4468	3.06608e-07	8.99241e-06	2.33056	2.33056	5.68983	2.4414
CAD	1473.35	3.13303e-07	9.1674e-06	0.55951	-1.78728	104.571	186.898
DKK3	145.103	3.14236e-07	9.17336e-06	2.24634	2.24634	21.8501	9.727
TAF1D	202.505	3.1554e-07	9.19012e-06	0.581514	-1.71965	12.8938	22.1728
ADAMTS9	660.666	3.16619e-07	9.20022e-06	1.75563	1.75563	106.361	60.5825
CSRNP3	456.728	3.18219e-07	9.20948e-06	1.81487	1.81487	42.2285	23.2681
C1QL1	385.903	3.18401e-07	9.20948e-06	1.99393	1.99393	41.1402	20.6327
CMSS1	333.692	3.20314e-07	9.24356e-06	0.58783	-1.70117	25.6451	43.6268
PLXNC1	71.2633	3.31252e-07	9.53339e-06	1.90336	1.90336	9.48436	4.98295
REEP2	240.661	3.31873e-07	9.53339e-06	1.85799	1.85799	22.8995	12.3249
RPS6	11047.6	3.33352e-07	9.53861e-06	0.548398	-1.82349	654.501	1193.48
PNRC1	965.096	3.33571e-07	9.53861e-06	1.85881	1.85881	87.84	47.2561
SYTL4	921.394	3.36282e-07	9.58063e-06	2.02034	2.02034	93.5913	46.3245
METTL8	184.83	3.36563e-07	9.58063e-06	0.59559	-1.67901	13.0437	21.9005
CHST8	487.487	3.41044e-07	9.6749e-06	1.93219	1.93219	38.0609	19.6983
RUFY2	206.095	3.41413e-07	9.6749e-06	1.6569	1.6569	20.3576	12.2866
PPP1R18	424.16	3.44478e-07	9.73981e-06	1.91493	1.91493	42.3678	22.125
KCNK3	414.05	3.51184e-07	9.90716e-06	1.89951	1.89951	39.3487	20.7152
MICAL2	28.7277	3.5424e-07	9.97104e-06	0.407238	-2.45556	1.61043	3.95451
WDR43	1310.69	3.5783e-07	1.00383e-05	0.562538	-1.77766	93.491	166.195
PCDHB13	28.7575	3.58227e-07	1.00383e-05	2.75657	2.75657	2.55832	0.928081
ZC2HC1A	186.994	3.62944e-07	1.01405e-05	1.72444	1.72444	17.923	10.3935
BCAT1	3741.54	3.63484e-07	1.01405e-05	0.556031	-1.79846	234.824	422.323
CHPT1	146.516	3.76609e-07	1.04834e-05	0.534605	-1.87054	12.8676	24.0693
DUS3L	241.415	3.84534e-07	1.06804e-05	0.517971	-1.93061	17.2218	33.2486
P4HA1	177.006	3.92849e-07	1.08465e-05	0.503201	-1.98728	13.2756	26.3822
SLC25A32	312.131	3.93049e-07	1.08465e-05	0.567993	-1.76058	22.7289	40.0162
FAM131A	63.3794	3.93103e-07	1.08465e-05	2.27326	2.27326	6.21202	2.73265
UNC79	410.244	4.01756e-07	1.1061e-05	1.66723	1.66723	35.9134	21.5407
IFI27L2	139.836	4.06173e-07	1.11582e-05	1.78352	1.78352	16.3324	9.1574
TUBB3	3340.27	4.08281e-07	1.11917e-05	1.86245	1.86245	249.304	133.858
FRAS1	156.22	4.13068e-07	1.12983e-05	0.490197	-2.04	5.8051	11.8424
FJX1	157.635	4.15026e-07	1.13272e-05	0.529842	-1.88736	10.4465	19.7162
DIMT1	232.647	4.18853e-07	1.14069e-05	0.598998	-1.66946	17.5432	29.2875
TMEM59L	73.5289	4.20241e-07	1.142e-05	2.17287	2.17287	5.5506	2.5545
PTP4A3	104.022	4.23804e-07	1.1492e-05	2.04989	2.04989	8.50181	4.14744
ACAP2	413.567	4.25158e-07	1.15039e-05	0.611091	-1.63642	32.6251	53.3882
CLSTN3	218.37	4.28195e-07	1.15613e-05	2.03486	2.03486	18.8491	9.2631
MLLT11	2580.95	4.34972e-07	1.17191e-05	1.86326	1.86326	272.988	146.511
C14orf132	4671.49	4.37922e-07	1.17734e-05	1.80087	1.80087	488.84	271.447
SETD6	110.938	4.44118e-07	1.19145e-05	0.565285	-1.76902	7.26933	12.8596
IGFBP4	174.005	4.5208e-07	1.20957e-05	0.447945	-2.23242	14.1798	31.6553
RARB	45.3647	4.53408e-07	1.20957e-05	2.0746	2.0746	5.75003	2.77163
FAM162A	91.4361	4.53758e-07	1.20957e-05	0.537273	-1.86125	6.05841	11.2762
HELZ2	184.889	4.6104e-07	1.22639e-05	1.96469	1.96469	14.706	7.48516
WNT6	31.3957	4.69636e-07	1.24662e-05	2.35954	2.35954	4.06184	1.72146
RBP3	14.8963	4.77725e-07	1.26542e-05	3.60773	3.60773	1.71875	0.476408
DFFA	217.232	4.78739e-07	1.26544e-05	0.550067	-1.81796	14.6988	26.7218
ARHGAP23	145.81	4.86025e-07	1.28155e-05	1.85527	1.85527	11.4891	6.19269
USP36	297.845	4.86872e-07	1.28155e-05	0.548689	-1.82253	19.3967	35.351
PXDN	242.286	4.8823e-07	1.28245e-05	0.575622	-1.73725	17.1494	29.7928
SNN	875.383	4.93291e-07	1.29304e-05	1.93422	1.93422	69.2918	35.8241
DDX21	1918.29	4.96493e-07	1.29873e-05	0.550087	-1.81789	133.667	242.992
PTPRN	486.448	4.99566e-07	1.30405e-05	1.97475	1.97475	54.0852	27.3885
LGALS1	23.5224	5.01575e-07	1.30659e-05	3.68566	3.68566	3.88489	1.05405
PKIB	326.508	5.05165e-07	1.31322e-05	1.75693	1.75693	39.259	22.3453
PPAT	634.104	5.11227e-07	1.32624e-05	0.559277	-1.78802	48.4797	86.6829
CRYZ	191.968	5.198e-07	1.3457e-05	0.586813	-1.70412	15.9404	27.1643
PUS7	458.107	5.21866e-07	1.34828e-05	0.566287	-1.76589	33.1961	58.6207
LINC02246	137.841	5.25309e-07	1.35439e-05	1.74688	1.74688	15.1671	8.68239
ST8SIA2	258.598	5.33014e-07	1.37145e-05	2.43954	2.43954	36.5748	14.9925
POLR3E	247.296	5.40801e-07	1.38864e-05	0.578714	-1.72797	17.3928	30.0543
GOLGA7B	187.415	5.44064e-07	1.39418e-05	1.76549	1.76549	19.4907	11.0398
NATD1	88.2877	5.50115e-07	1.40682e-05	1.94808	1.94808	7.18468	3.68809
NDUFAF2	104.181	5.54916e-07	1.41622e-05	0.52891	-1.89068	8.42688	15.9325
KIF3C	1204.09	5.5643e-07	1.41721e-05	1.86391	1.86391	107.212	57.5199
WDR47	575.428	5.68406e-07	1.44438e-05	1.91171	1.91171	56.6667	29.6419
C1QL4	84.8906	5.69395e-07	1.44438e-05	2.01846	2.01846	11.0583	5.47859
DCAF4	124.612	5.83332e-07	1.47676e-05	0.536672	-1.86334	8.55587	15.9425
PLCB1	173.587	5.87163e-07	1.48347e-05	1.77701	1.77701	30.3184	17.0614
ARRDC3	430.011	6.12563e-07	1.54454e-05	1.72694	1.72694	46.434	26.888
SPOCK1	101.812	6.20713e-07	1.55941e-05	2.50927	2.50927	4.49322	1.79065
EXOSC5	193.463	6.20938e-07	1.55941e-05	0.555807	-1.79919	13.8641	24.944
TTC9	38.4686	6.55664e-07	1.64334e-05	2.25009	2.25009	4.76677	2.11848
TRMT61A	112.157	6.6093e-07	1.65324e-05	0.539872	-1.85229	7.41978	13.7436
RPF2	432.572	6.68039e-07	1.66771e-05	0.58207	-1.71801	31.0981	53.4267
KLF15	19.3677	6.79811e-07	1.69246e-05	0.35103	-2.84876	1.01336	2.88681
CDC42EP3	711.653	6.80644e-07	1.69246e-05	1.81762	1.81762	96.1206	52.8827
REEP1	270.425	6.89169e-07	1.71028e-05	1.82763	1.82763	32.8634	17.9815
CAPN1	550.367	6.93754e-07	1.71827e-05	1.91285	1.91285	62.08	32.4542
RPL35	3728.2	6.97464e-07	1.72406e-05	0.58141	-1.71996	253.191	435.477
REXO2	55.5137	6.99713e-07	1.72623e-05	0.493363	-2.02691	3.73491	7.57031
ENO2	663.636	7.03387e-07	1.7319e-05	1.9188	1.9188	62.7019	32.6776
WDR4	91.2264	7.04761e-07	1.7319e-05	0.548811	-1.82212	6.08595	11.0893
TTF2	585.658	7.09698e-07	1.74063e-05	0.587754	-1.70139	47.4219	80.6831
TMA16	288.357	7.11535e-07	1.74174e-05	0.611527	-1.63525	20.4394	33.4235
RPL17	7650.57	7.16169e-07	1.74968e-05	0.586333	-1.70551	444.918	758.814
PPRC1	428.975	7.21753e-07	1.7599e-05	0.550246	-1.81737	28.8269	52.3891
TFAP4	209.253	7.26884e-07	1.76898e-05	0.553643	-1.80622	15.172	27.4039
PEG10	536.451	7.40535e-07	1.79873e-05	0.517159	-1.93364	33.4651	64.7096
GDI1	1432.36	7.43994e-07	1.80365e-05	1.88386	1.88386	139.377	73.9847
LPAR3	44.0772	7.57258e-07	1.83227e-05	0.4336	-2.30627	3.42829	7.90658
PRMT3	280.088	7.61622e-07	1.83929e-05	0.591068	-1.69185	22.0373	37.2839
DNAJC2	238.148	7.71191e-07	1.85621e-05	0.580443	-1.72282	17.7632	30.6028
RPL36	2946.24	7.71578e-07	1.85621e-05	0.587499	-1.70213	184.356	313.798
PAGE1	91.2426	7.73308e-07	1.85683e-05	0.479164	-2.08697	6.59964	13.7732
SYT4	821.075	7.75747e-07	1.85913e-05	1.8515	1.8515	109.792	59.2991
CHST2	346.608	7.79612e-07	1.86484e-05	0.521619	-1.91711	21.6246	41.4567
BRINP1	110.868	7.86397e-07	1.8775e-05	1.92346	1.92346	14.8429	7.7168
TMEM108	205.797	7.9237e-07	1.88818e-05	1.77724	1.77724	35.0315	19.7112
SFXN4	168.611	7.99117e-07	1.90066e-05	0.604876	-1.65323	11.317	18.7096
CCDC88C	244.704	8.0632e-07	1.91417e-05	0.554578	-1.80317	11.5569	20.8391
GMIP	300.256	8.09534e-07	1.91818e-05	1.71151	1.71151	25.0784	14.6527
DBH	37.5374	8.18632e-07	1.93609e-05	3.01713	3.01713	7.99197	2.64887
KLHL13	923.614	8.21003e-07	1.93806e-05	2.05847	2.05847	119.17	57.8925
ACSS1	78.8063	8.25817e-07	1.94379e-05	0.519141	-1.92626	5.27394	10.159
CECR6	125.689	8.2652e-07	1.94379e-05	2.00044	2.00044	12.4401	6.21868
HMCN1	54.4614	8.40653e-07	1.97334e-05	0.483936	-2.06639	4.04428	8.35706
PINK1	74.8868	8.67305e-07	2.03211e-05	2.2838	2.2838	7.84721	3.43603
SLC29A1	214	8.73264e-07	2.04227e-05	0.586648	-1.7046	18.7408	31.9456
NPPA	84.6	8.77156e-07	2.04279e-05	2.2104	2.2104	2.09365	0.947178
ATP1B3	379.845	8.77519e-07	2.04279e-05	0.596195	-1.6773	29.9705	50.2696
PDE4D	63.723	8.78357e-07	2.04279e-05	2.12518	2.12518	10.0985	4.75182
PALM2	65.37	9.07346e-07	2.10632e-05	0.465762	-2.14702	3.41653	7.33535
MAK16	374.408	9.20313e-07	2.13248e-05	0.581093	-1.7209	27.3025	46.9847
DDX55	259.568	9.33867e-07	2.15691e-05	0.583359	-1.71421	18.8721	32.3508
SCML1	93.9333	9.34283e-07	2.15691e-05	0.573793	-1.74279	8.05534	14.0388
MAP3K13	609.827	9.42539e-07	2.17198e-05	1.73163	1.73163	50.9368	29.4156
MRAS	256.975	9.45104e-07	2.17391e-05	1.78157	1.78157	26.579	14.9189
C19orf48	511.679	9.60697e-07	2.20575e-05	0.604104	-1.65534	41.5773	68.8247
TSC22D3	264.17	9.70069e-07	2.22321e-05	1.84251	1.84251	25.7081	13.9527
YPEL3	72.8438	9.8112e-07	2.24445e-05	1.99953	1.99953	6.7863	3.39395
ELAVL4	2264.05	1.00576e-06	2.29664e-05	1.73289	1.73289	216.307	124.825
FRMPD1	285.086	1.02594e-06	2.33847e-05	1.73973	1.73973	22.4473	12.9028
DYRK1B	170.262	1.03461e-06	2.35398e-05	1.82203	1.82203	12.6617	6.94924
GEMIN5	755.092	1.05809e-06	2.40305e-05	0.554511	-1.80339	53.2217	95.9797
PCDH1	31.9257	1.06756e-06	2.41991e-05	2.69161	2.69161	3.82677	1.42174
PCDHB14	126.873	1.06936e-06	2.41991e-05	1.81888	1.81888	12.9269	7.10707
PHLDB2	685.384	1.0759e-06	2.4262e-05	0.620122	-1.61258	60.4722	97.5166
FXN	122.437	1.076e-06	2.4262e-05	0.592577	-1.68754	8.57955	14.4784
NLGN3	35.9239	1.08925e-06	2.45169e-05	2.21406	2.21406	4.21646	1.9044
KIRREL	224.351	1.11318e-06	2.50107e-05	0.53379	-1.87339	17.0287	31.9014
FAT1	266.104	1.12277e-06	2.51813e-05	0.541372	-1.84716	21.5692	39.8417
ZNF587B	133.214	1.12956e-06	2.52674e-05	0.596673	-1.67596	9.1724	15.3726
ARHGEF37	19.782	1.13063e-06	2.52674e-05	2.67904	2.67904	1.97634	0.737707
SLC25A19	75.9643	1.13626e-06	2.53246e-05	0.525222	-1.90396	6.03076	11.4823
ABCE1	1533.38	1.13721e-06	2.53246e-05	0.600811	-1.66442	112	186.415
PLXNA3	318.891	1.1599e-06	2.57841e-05	1.74371	1.74371	21.2563	12.1902
PIK3CD	46.2486	1.17133e-06	2.59842e-05	2.28792	2.28792	3.49436	1.52731
CTNNAL1	374.488	1.17494e-06	2.59842e-05	0.603978	-1.65569	33.6999	55.7965
FAM84A	14313.3	1.17509e-06	2.59842e-05	1.72285	1.72285	1179.3	684.507
PAK3	451.004	1.1986e-06	2.64575e-05	1.76649	1.76649	45.0967	25.529
JPH1	53.6924	1.20331e-06	2.6515e-05	0.457655	-2.18505	3.5401	7.73529
CSDC2	56.8399	1.22094e-06	2.68564e-05	2.11009	2.11009	3.4072	1.61472
NCOA7	234.32	1.2291e-06	2.69886e-05	1.73315	1.73315	23.7047	13.6773
SIX4	135.574	1.23686e-06	2.71117e-05	0.596859	-1.67544	8.57726	14.3707
ZBTB20	43.7443	1.25267e-06	2.73853e-05	2.18401	2.18401	3.54846	1.62475
KAZN	62.9126	1.25369e-06	2.73853e-05	2.29867	2.29867	7.75932	3.37558
SNHG8	163.703	1.26212e-06	2.75216e-05	0.595566	-1.67907	10.7412	18.0352
SRM	217.9	1.26554e-06	2.75485e-05	0.575279	-1.73829	14.6074	25.3919
ARHGAP29	309.553	1.27771e-06	2.77561e-05	1.71329	1.71329	57.4409	33.5266
E2F5	116.833	1.27949e-06	2.77561e-05	0.592711	-1.68716	8.58199	14.4792
GUCY1A3	110.957	1.28855e-06	2.79045e-05	0.594366	-1.68246	7.01114	11.796
TEX15	129.473	1.29395e-06	2.79734e-05	0.539888	-1.85224	10.5845	19.6049
RELN	34.8657	1.3309e-06	2.87228e-05	2.86323	2.86323	0.874563	0.305447
OLFM3	25.88	1.34626e-06	2.90045e-05	2.28713	2.28713	3.46291	1.51408
CNGA3	281.744	1.37196e-06	2.95077e-05	1.71902	1.71902	39.2436	22.829
TFB2M	217.309	1.4003e-06	3.00659e-05	0.603819	-1.65613	15.4491	25.5857
IGSF9	122.365	1.40934e-06	3.02085e-05	0.575395	-1.73794	7.48892	13.0153
TRMT1	375.628	1.41399e-06	3.02565e-05	0.598788	-1.67004	25.5804	42.7202
ERLIN1	230.071	1.41943e-06	3.03014e-05	0.610251	-1.63867	19.7672	32.392
NT5DC3	400.897	1.4209e-06	3.03014e-05	0.558532	-1.79041	29.3637	52.573
STEAP3	35.434	1.42906e-06	3.04238e-05	0.428488	-2.33379	2.29514	5.35637
NRG1	179.322	1.45125e-06	3.08439e-05	1.7345	1.7345	15.8742	9.15203
NSG1	300.477	1.46921e-06	3.1173e-05	1.80299	1.80299	21.3174	11.8233
CACNB3	293.074	1.47681e-06	3.12816e-05	1.82591	1.82591	30.6204	16.7699
FYCO1	95.1311	1.48183e-06	3.13352e-05	0.557326	-1.79428	6.38466	11.4559
MDN1	1701.34	1.51186e-06	3.19164e-05	0.573832	-1.74267	108.163	188.493
PAK1IP1	194.513	1.53852e-06	3.24083e-05	0.559353	-1.78778	13.9668	24.9695
NOP56	1192.6	1.54031e-06	3.24083e-05	0.611765	-1.63462	93.2157	152.372
CDKN2D	61.7886	1.56061e-06	3.27527e-05	1.96653	1.96653	6.12793	3.11612
MAP3K21	19.3496	1.56188e-06	3.27527e-05	0.374415	-2.67084	1.18885	3.17523
CBS	623.552	1.56615e-06	3.27875e-05	0.592361	-1.68816	42.5072	71.7589
LINC00998	137.141	1.57312e-06	3.28786e-05	0.577273	-1.73228	9.33576	16.1722
SIGMAR1	626.609	1.58598e-06	3.30924e-05	0.575571	-1.7374	45.0466	78.2642
ANK3	619.424	1.60455e-06	3.34245e-05	1.73948	1.73948	62.2564	35.7902
HES6	248.798	1.6102e-06	3.34868e-05	0.579277	-1.72629	18.4795	31.9009
ARHGEF26	18.8772	1.64692e-06	3.41939e-05	0.356382	-2.80598	1.03478	2.90356
PTCD2	82.4189	1.65574e-06	3.43204e-05	0.583222	-1.71461	5.83877	10.0112
SLC22A18	21.8897	1.6738e-06	3.46377e-05	2.63612	2.63612	2.01651	0.764954
H19	43.6866	1.71436e-06	3.53761e-05	2.71448	2.71448	9.75213	3.59263
APBA1	458.112	1.7151e-06	3.53761e-05	2.0083	2.0083	50.7615	25.2759
NHLH2	1157.2	1.718e-06	3.53778e-05	1.69334	1.69334	93.6197	55.2869
PALM	409.557	1.74403e-06	3.58552e-05	1.82224	1.82224	40.9207	22.4563
CDKN1C	91.4931	1.7472e-06	3.58618e-05	1.86177	1.86177	7.88137	4.23326
RNF182	308.956	1.78673e-06	3.65576e-05	1.90379	1.90379	29.7808	15.6429
SERPINF1	678.339	1.78691e-06	3.65576e-05	0.54523	-1.83409	51.1983	93.9022
RPS14	7488.16	1.79333e-06	3.66293e-05	0.604665	-1.65381	458.609	758.451
PAQR5	16.6999	1.80971e-06	3.69039e-05	0.375033	-2.66643	0.772919	2.06094
FBL	697.577	1.82515e-06	3.71586e-05	0.580141	-1.72372	49.7245	85.711
LINGO2	23.4033	1.83872e-06	3.73744e-05	2.45593	2.45593	2.85766	1.16358
RPS17	12661.6	1.88007e-06	3.81532e-05	0.593866	-1.68388	780.437	1314.16
PPAN-P2RY11	92.2284	1.88911e-06	3.82749e-05	0.49599	-2.01617	5.50182	11.0926
TMEM123	316.149	1.92011e-06	3.88405e-05	0.575592	-1.73734	24.7793	43.0502
NOL6	589.646	1.93114e-06	3.9001e-05	0.57558	-1.73738	40.5141	70.3882
CDYL2	81.3371	1.95936e-06	3.95076e-05	1.79976	1.79976	7.43228	4.12959
TRPM4	57.2109	1.9681e-06	3.95731e-05	1.88269	1.88269	6.03316	3.20454
TXN	1192.25	1.9689e-06	3.95731e-05	0.627984	-1.5924	87.8368	139.871
RAB12	90.6265	1.9809e-06	3.97028e-05	0.58608	-1.70625	6.35973	10.8513
DCAF13	571.333	1.98167e-06	3.97028e-05	0.605814	-1.65067	41.0884	67.8234
ITGB3BP	154.243	2.00768e-06	4.016e-05	0.581308	-1.72026	11.9772	20.6039
PCDHB11	80.1721	2.01483e-06	4.02391e-05	1.86382	1.86382	7.14798	3.83512
PNPT1	734.996	2.02395e-06	4.03572e-05	0.596911	-1.67529	52.6893	88.2699
RXRG	229.11	2.05502e-06	4.08735e-05	1.85851	1.85851	7.87747	4.2386
P4HTM	32.7886	2.05634e-06	4.08735e-05	2.42894	2.42894	4.2756	1.76028
EARS2	304.545	2.06712e-06	4.10115e-05	0.582428	-1.71695	22.2865	38.2648
RPS2	14801.6	2.06981e-06	4.10115e-05	0.598173	-1.67176	962.283	1608.71
TCAF1	1875.97	2.0843e-06	4.12337e-05	1.76668	1.76668	183.414	103.819
ARHGDIG	90.5348	2.09792e-06	4.14275e-05	1.80747	1.80747	8.28967	4.58635
SHISA6	83.067	2.10154e-06	4.14275e-05	1.94842	1.94842	10.8668	5.57727
ANKS6	194.836	2.10397e-06	4.14275e-05	0.573527	-1.7436	13.7839	24.0337
TRIL	56.4102	2.13312e-06	4.19359e-05	3.60216	3.60216	14.0769	3.90791
SAMD14	264.377	2.13649e-06	4.19366e-05	1.76201	1.76201	24.5926	13.9571
TMEM100	27.5368	2.1419e-06	4.19772e-05	2.0682	2.0682	3.0593	1.47921
NSUN2	524.556	2.16048e-06	4.22756e-05	0.599331	-1.66853	38.0662	63.5145
ZNF692	94.0939	2.20724e-06	4.31234e-05	0.576658	-1.73413	5.82706	10.1049
CARNMT1	87.5033	2.26634e-06	4.42094e-05	0.589693	-1.6958	5.64895	9.57947
LRRTM2	398.81	2.29711e-06	4.47404e-05	1.72378	1.72378	25.4475	14.7627
ZSWIM8	328.186	2.31892e-06	4.50952e-05	1.70628	1.70628	30.7339	18.0123
EXOSC7	247.858	2.34354e-06	4.55038e-05	0.61756	-1.61928	18.7806	30.411
WDR35	398.402	2.36158e-06	4.57833e-05	0.621533	-1.60892	29.9019	48.11
LOC642366	205.062	2.36557e-06	4.57901e-05	1.67365	1.67365	14.9703	8.94469
DUSP4	805.929	2.39231e-06	4.62366e-05	1.8396	1.8396	72.0109	39.1448
CTNNBIP1	111.222	2.40983e-06	4.64749e-05	1.83036	1.83036	12.4576	6.80608
LTA4H	955.954	2.41203e-06	4.64749e-05	0.57467	-1.74013	65.2652	113.57
CHORDC1	411.162	2.42169e-06	4.65898e-05	0.632875	-1.58009	29.6779	46.8938
ATP5G1	724.001	2.43129e-06	4.67031e-05	0.619401	-1.61446	54.4107	87.8441
SERBP1	5315.5	2.473e-06	4.74318e-05	0.585798	-1.70707	388.482	663.167
RFPL1S	41.1515	2.50235e-06	4.79218e-05	1.94183	1.94183	4.9459	2.54703
GPRIN3	934.392	2.52691e-06	4.82415e-05	1.77558	1.77558	82.3634	46.3867
RCC1	260.115	2.52739e-06	4.82415e-05	0.592979	-1.6864	20.3112	34.2529
POLR3D	372.429	2.53055e-06	4.82415e-05	0.61039	-1.6383	23.7311	38.8786
MMP24-AS1	59.8576	2.54486e-06	4.84408e-05	1.88765	1.88765	5.79298	3.06888
CIART	37.7986	2.55578e-06	4.85753e-05	0.498148	-2.00744	2.19581	4.40794
CUL4A	484.917	2.56212e-06	4.86222e-05	0.607387	-1.6464	36.6292	60.3061
RPIA	129.624	2.57765e-06	4.88141e-05	0.59625	-1.67715	9.95972	16.7039
HIPK3	577.383	2.57999e-06	4.88141e-05	1.57109	1.57109	53.6565	34.1524
NDRG1	130.409	2.58973e-06	4.8925e-05	2.0856	2.0856	14.3915	6.90038
C2orf91	15.473	2.60256e-06	4.90659e-05	2.69214	2.69214	1.82278	0.677075
NDRG4	575.514	2.605e-06	4.90659e-05	1.92746	1.92746	85.7551	44.4913
CKMT1A	501.907	2.61665e-06	4.92118e-05	0.537661	-1.85991	34.6309	64.4103
C12orf66	61.3217	2.6864e-06	5.04482e-05	0.568058	-1.76038	4.64024	8.16861
TSR1	738.006	2.70763e-06	5.07711e-05	0.595612	-1.67895	53.5412	89.8927
TRAP1	847.077	2.71277e-06	5.07918e-05	0.582705	-1.71613	59.1081	101.437
MORC4	57.5915	2.72726e-06	5.09872e-05	0.55632	-1.79753	4.70808	8.46291
AHRR	39.5113	2.7567e-06	5.14611e-05	2.44539	2.44539	0.921242	0.376726
HEATR1	1579.14	2.78711e-06	5.19517e-05	0.60756	-1.64593	113.474	186.77
KCNB2	810.47	2.80662e-06	5.2168e-05	1.56569	1.56569	89.7662	57.3334
RPL29	6246.42	2.80701e-06	5.2168e-05	0.617395	-1.61971	392.625	635.938
NETO1	41.9629	2.81122e-06	5.21692e-05	0.506713	-1.97351	2.97181	5.86488
SYBU	564.706	2.8281e-06	5.24052e-05	1.67409	1.67409	34.9779	20.8936
RPL5	11807.5	2.8415e-06	5.25761e-05	0.618546	-1.61669	728.53	1177.81
TRABD	143.134	2.87746e-06	5.31633e-05	0.597776	-1.67287	10.1205	16.9303
DNAJC12	268.726	2.88242e-06	5.31769e-05	0.629203	-1.58931	14.3644	22.8296
GABRA5	95.4696	2.89436e-06	5.33189e-05	0.517938	-1.93073	8.36285	16.1464
CALCOCO1	200.374	2.90187e-06	5.33494e-05	1.77336	1.77336	16.6459	9.38661
AKAP1	818.616	2.9082e-06	5.33494e-05	0.607141	-1.64706	57.1753	94.1715
SPSB4	258.955	2.90873e-06	5.33494e-05	1.73718	1.73718	33.0612	19.0315
ABAT	117.345	2.91539e-06	5.33936e-05	1.6556	1.6556	10.1466	6.12867
PAM16	102.05	2.92276e-06	5.34509e-05	0.585465	-1.70805	6.93172	11.8397
NME2	5167.06	2.93288e-06	5.3558e-05	0.61931	-1.6147	394.276	636.638
NPL	20.8857	2.96049e-06	5.3984e-05	0.386733	-2.58576	1.18515	3.06452
RAB3D	298.842	2.98473e-06	5.43471e-05	1.799	1.799	29.937	16.6409
PLPPR3	522.516	2.99187e-06	5.43985e-05	1.81012	1.81012	43.9247	24.2661
DBNDD1	168.2	3.06875e-06	5.57158e-05	1.68623	1.68623	16.2074	9.61167
RHBDL3	220.263	3.08309e-06	5.58954e-05	1.69226	1.69226	21.3246	12.6013
PGM2L1	178.119	3.1019e-06	5.61555e-05	1.69351	1.69351	14.4044	8.50566
FAM49A	72.337	3.13102e-06	5.65718e-05	1.88238	1.88238	7.18441	3.81666
GREB1L	460.714	3.13389e-06	5.65718e-05	1.61675	1.61675	47.3528	29.2889
RPL27	9653.08	3.1484e-06	5.67494e-05	0.587926	-1.70089	582.67	991.059
ENO1	5478.47	3.15275e-06	5.67494e-05	0.565245	-1.76914	415.013	734.218
CSPG4	34.3277	3.17981e-06	5.71548e-05	0.439823	-2.27364	1.51772	3.45076
SGCB	670.818	3.21192e-06	5.7612e-05	1.65116	1.65116	72.4886	43.9017
CHRM2	98.811	3.2144e-06	5.7612e-05	1.90943	1.90943	18.5335	9.7063
PCBP4	1103.34	3.22343e-06	5.76915e-05	1.71075	1.71075	98.4536	57.5499
SYNPO2	671.479	3.22962e-06	5.77202e-05	1.76797	1.76797	61.9588	35.0453
IQSEC1	976.488	3.24029e-06	5.78205e-05	1.8423	1.8423	62.2351	33.7812
MRPL12	350.989	3.24442e-06	5.78205e-05	0.626622	-1.59586	27.3517	43.6495
LRP10	123.677	3.27152e-06	5.8221e-05	1.75945	1.75945	10.4822	5.95767
C15orf62	77.2707	3.28232e-06	5.83308e-05	1.73435	1.73435	10.4595	6.03077
ETV1	224.18	3.30231e-06	5.84837e-05	1.69258	1.69258	21.8236	12.8936
GTF2IP4	1385.87	3.3038e-06	5.84837e-05	1.64697	1.64697	138.327	83.9889
LOC100126784	81.5113	3.30487e-06	5.84837e-05	1.76042	1.76042	7.33731	4.16793
DRAXIN	101.309	3.32821e-06	5.88139e-05	1.72441	1.72441	12.1072	7.02107
NAP1L5	219.176	3.36201e-06	5.9328e-05	1.77736	1.77736	20.503	11.5356
ANK1	129.581	3.40695e-06	6.00368e-05	1.68253	1.68253	12.6269	7.50468
SNHG15	145.231	3.46068e-06	6.08266e-05	0.584238	-1.71163	10.2173	17.4883
LTBP3	188.914	3.46144e-06	6.08266e-05	1.70706	1.70706	18.8024	11.0145
NREP	2695.15	3.46796e-06	6.08354e-05	1.63132	1.63132	246.856	151.323
WBSCR17	356.731	3.47192e-06	6.08354e-05	1.64851	1.64851	30.3494	18.4102
JAKMIP2	671.572	3.48029e-06	6.08354e-05	1.61076	1.61076	62.3143	38.6862
GAS5	1001.11	3.48128e-06	6.08354e-05	0.607262	-1.64673	45.6609	75.1914
SLC44A2	257.601	3.50767e-06	6.12115e-05	1.73677	1.73677	27.3764	15.7628
PA2G4	1880.14	3.60498e-06	6.27648e-05	0.576194	-1.73553	143.53	249.101
APH1B	285.384	3.60666e-06	6.27648e-05	1.63498	1.63498	28.6626	17.5309
B4GALNT3	68.0808	3.65454e-06	6.34346e-05	0.549768	-1.81895	4.53091	8.2415
GCNT2	157.179	3.65523e-06	6.34346e-05	1.66869	1.66869	12.2788	7.35836
CCDC92	93.1352	3.69952e-06	6.41148e-05	1.76853	1.76853	9.26903	5.24108
WDR77	584.136	3.72525e-06	6.44719e-05	0.575947	-1.73627	43.6525	75.7925
RENBP	18.5764	3.74273e-06	6.46856e-05	2.91747	2.91747	1.74982	0.599774
WDR46	367.566	3.76086e-06	6.49097e-05	0.578628	-1.72823	26.6138	45.9946
RALGPS1	61.502	3.80239e-06	6.55365e-05	1.7883	1.7883	5.58969	3.1257
CERS4	32.4069	3.83992e-06	6.60928e-05	2.10568	2.10568	3.21148	1.52515
MAPK4	120.909	3.88459e-06	6.67704e-05	1.67634	1.67634	13.3327	7.95347
ELK3	157.4	3.89223e-06	6.68105e-05	0.581955	-1.71835	12.1714	20.9147
SLC25A15	328.785	3.95047e-06	6.77176e-05	0.615949	-1.62351	25.7776	41.8502
DDX10	286.385	3.96762e-06	6.79192e-05	0.620216	-1.61234	22.1203	35.6655
PMM2	170.737	3.9844e-06	6.80736e-05	0.619943	-1.61305	12.2096	19.6948
UTP18	796.844	3.98746e-06	6.80736e-05	0.615046	-1.62589	61.3603	99.7653
SMG1P2	75.2018	4.00965e-06	6.83597e-05	0.562074	-1.77912	4.77557	8.49634
SLC37A1	23.4127	4.03144e-06	6.8585e-05	2.36418	2.36418	1.51569	0.641107
PSAT1	457.294	4.03377e-06	6.8585e-05	0.598078	-1.67202	35.8932	60.0142
DIEXF	381.976	4.05508e-06	6.88542e-05	0.583437	-1.71398	25.6434	43.9523
PCDHB12	37.3621	4.06277e-06	6.88919e-05	2.10077	2.10077	3.02081	1.43795
TSPOAP1	34.7868	4.11257e-06	6.96425e-05	2.34053	2.34053	1.83223	0.782828
PLCH2	156.416	4.16298e-06	7.04014e-05	0.547318	-1.82709	5.34538	9.7665
RSAD1	309.279	4.1691e-06	7.04102e-05	0.589666	-1.69587	21.7916	36.9558
YDJC	62.2611	4.19328e-06	7.07236e-05	0.556855	-1.7958	4.49548	8.07297
NYAP2	18.0127	4.22025e-06	7.10833e-05	2.80068	2.80068	1.50748	0.538256
UFL1	234.119	4.24465e-06	7.13776e-05	0.629066	-1.58966	18.6957	29.7199
CTSC	399.587	4.25245e-06	7.13776e-05	0.621402	-1.60926	32.478	52.2658
RGS10	132.764	4.25474e-06	7.13776e-05	0.598181	-1.67173	7.50821	12.5517
RPL8	8648.39	4.26546e-06	7.14093e-05	0.614613	-1.62704	592.537	964.081
PGAM5	569.949	4.26799e-06	7.14093e-05	0.584853	-1.70983	44.6069	76.2703
EEF2K	266	4.28123e-06	7.15357e-05	0.595013	-1.68064	20.0507	33.698
MAPRE3	84.7623	4.30142e-06	7.17778e-05	1.83209	1.83209	7.04763	3.84676
SIPA1L1	46.2037	4.32103e-06	7.20095e-05	0.519802	-1.92381	3.00576	5.78251
RARA-AS1	15.7157	4.3665e-06	7.26711e-05	3.30012	3.30012	1.68689	0.511159
EEF1A2	721.963	4.42444e-06	7.35381e-05	1.83522	1.83522	68.101	37.1077
RNF165	257.669	4.43772e-06	7.36614e-05	1.5974	1.5974	21.9984	13.7714
MAP3K12	243.427	4.47981e-06	7.42621e-05	1.67702	1.67702	20.5941	12.2802
XKR7	425.785	4.53325e-06	7.50492e-05	1.66025	1.66025	25.4267	15.3149
BCL2	357.226	4.5468e-06	7.51745e-05	1.78611	1.78611	56.3348	31.5406
SLC43A1	31.6095	4.58918e-06	7.57758e-05	0.459485	-2.17635	1.85884	4.04547
NOB1	244.946	4.61688e-06	7.61332e-05	0.571967	-1.74835	16.0238	28.0153
CYYR1	166.899	4.70437e-06	7.74743e-05	0.602795	-1.65894	12.4174	20.5996
TTLL12	473.264	4.75369e-06	7.81842e-05	0.556773	-1.79606	33.5381	60.2367
HGSNAT	137.658	4.80197e-06	7.88752e-05	1.77581	1.77581	16.0467	9.03623
KATNAL1	446.798	4.87185e-06	7.98817e-05	1.58596	1.58596	50.3419	31.7422
PRPS2	239.825	4.87621e-06	7.98817e-05	0.558683	-1.78992	20.4191	36.5486
NAA25	622.133	4.88579e-06	7.98817e-05	0.628123	-1.59204	46.1343	73.4479
TLE4	485.254	4.88865e-06	7.98817e-05	1.5705	1.5705	44.2592	28.1815
CPEB4	255.054	4.90527e-06	8.00494e-05	1.67278	1.67278	20.6038	12.3171
SEZ6L2	806.17	4.93019e-06	8.03519e-05	1.82204	1.82204	83.7164	45.9464
SNHG17	51.1506	4.95193e-06	8.06018e-05	0.55814	-1.79166	3.3414	5.98667
FMN1	82.7922	4.99169e-06	8.11439e-05	1.88642	1.88642	10.0632	5.33453
C18orf32	277.642	5.08332e-06	8.25269e-05	1.63181	1.63181	25.4991	15.6263
WDR44	123.078	5.10815e-06	8.28231e-05	1.75083	1.75083	12.8353	7.33094
NDUFAF4	334.46	5.12774e-06	8.30338e-05	0.631496	-1.58354	23.8505	37.7683
DPF3	132.874	5.20547e-06	8.41841e-05	1.64006	1.64006	16.6461	10.1497
FAM212B-AS1	158.251	5.22637e-06	8.44136e-05	1.70259	1.70259	17.4474	10.2475
ACTN2	17.8128	5.2417e-06	8.45526e-05	0.346263	-2.88798	0.72205	2.08526
GLB1L2	40.2978	5.26508e-06	8.48211e-05	0.494081	-2.02396	2.81429	5.696
NR2F2	76.2615	5.32025e-06	8.56003e-05	0.520692	-1.92052	4.51349	8.66825
UBL3	188.397	5.37132e-06	8.63116e-05	1.64549	1.64549	16.6673	10.1291
C20orf27	301.935	5.41545e-06	8.68439e-05	0.604891	-1.65319	21.642	35.7783
PWP2	342.512	5.41825e-06	8.68439e-05	0.587435	-1.70232	24.9016	42.3904
GTF2IP1	669.305	5.45972e-06	8.73972e-05	1.67507	1.67507	68.5064	40.8977
NTRK1	1977.73	5.61687e-06	8.97986e-05	1.72094	1.72094	179.952	104.566
PDSS1	88.7777	5.65059e-06	9.0223e-05	0.585744	-1.70723	6.72176	11.4756
CDH5	13.1912	5.68323e-06	9.06291e-05	2.85415	2.85415	1.39963	0.490383
LAMA5	135.178	5.6979e-06	9.07481e-05	1.71904	1.71904	8.99308	5.23145
CHRNA3	6062.05	5.7321e-06	9.11773e-05	1.70711	1.70711	638.427	373.981
GPR162	216.099	5.76796e-06	9.16318e-05	1.69719	1.69719	19.9916	11.7792
AK2	528.121	5.77749e-06	9.16676e-05	0.639731	-1.56316	41.5127	64.8908
XPOT	1525.49	5.84558e-06	9.24753e-05	0.612831	-1.63177	116.14	189.514
MTFP1	105.855	5.84647e-06	9.24753e-05	0.56107	-1.78231	8.45736	15.0736
FKBP1B	108.301	5.85045e-06	9.24753e-05	1.59123	1.59123	11.2607	7.07674
EMG1	228.776	5.87645e-06	9.27698e-05	0.626987	-1.59493	17.2722	27.548
PFAS	1189.77	5.89465e-06	9.29405e-05	0.607313	-1.6466	86.7526	142.847
GOLGA8A	149.392	5.92809e-06	9.33508e-05	0.502278	-1.99093	8.45174	16.8268
SORCS2	48.3911	5.94241e-06	9.34275e-05	1.76739	1.76739	3.6457	2.06276
ZNF627	627.471	5.94782e-06	9.34275e-05	1.5567	1.5567	56.1372	36.0617
TUBB2B	5285.4	5.98139e-06	9.38377e-05	1.72845	1.72845	394.981	228.518
ENO3	343.067	6.03303e-06	9.44752e-05	1.65887	1.65887	28.9853	17.4729
ADAMTS8	69.1833	6.03704e-06	9.44752e-05	1.98346	1.98346	12.8608	6.48401
ARHGEF10L	169.307	6.05937e-06	9.47068e-05	1.74479	1.74479	15.4912	8.87854
LRRC4	50.9149	6.1287e-06	9.56715e-05	1.91432	1.91432	4.79858	2.50668
CEP83	191.67	6.17184e-06	9.62256e-05	0.643984	-1.55283	14.767	22.9307
MFSD6	107.539	6.21113e-06	9.6609e-05	1.59689	1.59689	9.95519	6.23413
AATK	91.1973	6.21755e-06	9.6609e-05	1.6387	1.6387	7.49541	4.57401
IQSEC3	31.0923	6.21947e-06	9.6609e-05	2.29711	2.29711	2.8851	1.25597
MTRR	149.303	6.2563e-06	9.70613e-05	0.634277	-1.5766	11.3455	17.8873
NBEAL2	89.9924	6.28939e-06	9.74546e-05	0.58681	-1.70413	6.06319	10.3325
RAI2	21.0737	6.46014e-06	9.99773e-05	2.53831	2.53831	2.40312	0.94674
MYCL	32.0347	6.55722e-06	0.000101355	0.451531	-2.21469	1.89911	4.20592
C15orf39	123.998	6.60046e-06	0.000101898	0.520535	-1.9211	8.10014	15.5612
KIF13B	145.136	6.66732e-06	0.000102804	1.7758	1.7758	15.0726	8.48775
TPPP	132.071	6.67838e-06	0.000102849	1.63778	1.63778	9.95436	6.07796
TBC1D9	362.485	6.73919e-06	0.000103658	1.68022	1.68022	34.042	20.2605
EML5	297.977	6.86318e-06	0.000105436	1.61649	1.61649	38.648	23.9086
CCNA1	40.6825	6.92243e-06	0.000106217	2.00911	2.00911	6.62986	3.29991
GRWD1	380.884	6.95504e-06	0.000106587	0.621086	-1.61008	29.793	47.9692
LTBP1	69.3703	6.97042e-06	0.000106693	0.482814	-2.07119	6.37891	13.2119
SLC22A15	107.455	7.00741e-06	0.000107129	1.59449	1.59449	10.6827	6.69976
MICAL1	960.356	7.03726e-06	0.000107455	1.62283	1.62283	77.3023	47.6342
RALYL	200.142	7.08444e-06	0.000108044	1.6102	1.6102	20.0071	12.4252
NOM1	222.173	7.1084e-06	0.000108278	0.643075	-1.55503	17.2223	26.7812
KDM5B	2312.84	7.25353e-06	0.000110355	1.72735	1.72735	184.156	106.612
NHLH1	436.607	7.27752e-06	0.000110587	1.7272	1.7272	13.388	7.75128
CACNA1C	169.558	7.32175e-06	0.000111125	1.63204	1.63204	11.1605	6.83837
CACFD1	170.801	7.3343e-06	0.000111181	1.72852	1.72852	16.7396	9.68433
ODC1	3002.34	7.37634e-06	0.000111684	0.613376	-1.63032	229.722	374.521
PINX1	157.571	7.43434e-06	0.000112426	0.623933	-1.60274	12.352	19.7971
PABPC1	4597.81	7.53084e-06	0.000113749	0.529178	-1.88972	270.539	511.243
COL6A2	479.814	7.56046e-06	0.00011406	1.68617	1.68617	53.2737	31.5944
MAGOH	268.82	7.59046e-06	0.000114375	0.638996	-1.56495	22.7843	35.6563
THUMPD2	202.012	7.64563e-06	0.000115069	0.648244	-1.54263	15.5368	23.9675
RPL32	7506.3	7.70851e-06	0.000115876	0.647644	-1.54406	480.681	742.199
KAT2A	245.705	7.73222e-06	0.000116094	0.597795	-1.67282	17.4162	29.1341
ARL6IP5	625.195	7.74214e-06	0.000116104	1.54532	1.54532	65.8455	42.6096
NEUROG2	543.492	7.78753e-06	0.000116517	1.70933	1.70933	75.8561	44.3777
TCOF1	767.103	7.78819e-06	0.000116517	0.615242	-1.62538	59.16	96.1572
LOC100294145	1005.01	7.80502e-06	0.00011663	1.53058	1.53058	79.2383	51.77
TPST1	127.757	7.92775e-06	0.000118324	1.62807	1.62807	15.0889	9.26797
ZNF814	264.081	7.93944e-06	0.000118358	0.638685	-1.56572	17.9136	28.0476
PLEKHH3	255.82	7.95719e-06	0.000118469	1.73856	1.73856	30.0785	17.3008
NFASC	455	7.97139e-06	0.000118469	1.62724	1.62724	34.9725	21.4919
MEIS1-AS3	176.977	7.97512e-06	0.000118469	1.57575	1.57575	17.8936	11.3556
TTC27	170.653	7.9997e-06	0.000118606	0.618306	-1.61732	13.1161	21.2129
NIFK	483.63	8.00324e-06	0.000118606	0.63766	-1.56823	34.9825	54.8607
RPS4Y1	2316.88	8.02437e-06	0.00011878	0.641892	-1.55789	146.233	227.815
GPR173	147.204	8.0615e-06	0.000119189	1.58712	1.58712	10.7028	6.74352
MIPEP	66.2676	8.08706e-06	0.000119398	0.543474	-1.84002	4.89434	9.00567
PDLIM7	162.962	8.09464e-06	0.000119398	1.62195	1.62195	14.9819	9.23694
PTPN21	211.005	8.11007e-06	0.000119486	1.6189	1.6189	21.6683	13.3846
BDH2	122.83	8.18684e-06	0.000120474	0.610242	-1.6387	9.54434	15.6403
CDCA7L	338.393	8.19629e-06	0.000120474	0.65062	-1.537	31.2471	48.0266
KAT2B	29.6467	8.21882e-06	0.000120664	1.94861	1.94861	2.34557	1.20371
RPP40	36.8425	8.23789e-06	0.000120803	0.525332	-1.90356	2.5084	4.77489
QTRT1	142.733	8.27372e-06	0.000121187	0.625606	-1.59845	9.85579	15.754
CCNB1IP1	869.578	8.3089e-06	0.000121561	0.646052	-1.54786	56.4081	87.3121
PTRH2	313.466	8.35227e-06	0.000122054	0.653772	-1.52959	23.7898	36.3886
MBLAC2	93.0903	8.41504e-06	0.000122828	0.622517	-1.60638	6.66673	10.7093
FBLIM1	58.544	8.52978e-06	0.000124359	1.93618	1.93618	5.97987	3.08848
NEDD9	104.054	8.5984e-06	0.000125214	1.95859	1.95859	19.2518	9.82945
DHX33	342.163	8.669e-06	0.000126096	0.562508	-1.77775	21.6686	38.5213
KIAA1324L	164.365	8.68405e-06	0.000126169	1.70058	1.70058	20.404	11.9982
AMD1	1311.78	8.72807e-06	0.000126663	0.655979	-1.52444	104.572	159.414
B3GALNT2	646.403	8.74045e-06	0.000126696	0.646156	-1.54761	51.0006	78.9293
MAGED2	1778.77	8.77167e-06	0.000127002	1.69172	1.69172	188.398	111.364
DENND5B	708.216	8.88632e-06	0.000128515	1.63002	1.63002	76.3754	46.8555
BASP1	1946.6	8.95596e-06	0.000129373	1.63457	1.63457	174.276	106.619
ITGA1	245.669	8.97604e-06	0.000129514	1.57519	1.57519	23.8173	15.1202
PM20D2	415.793	8.99733e-06	0.000129673	0.652942	-1.53153	35.9228	55.0168
LMTK3	33.7158	9.11361e-06	0.000131198	2.00485	2.00485	2.76272	1.37802
PNPLA8	355.722	9.14423e-06	0.000131489	1.56944	1.56944	34.7557	22.1453
TIMM50	656.664	9.16825e-06	0.000131571	0.618712	-1.61626	43.8345	70.8479
RPS3A	15963	9.17369e-06	0.000131571	0.611744	-1.63467	986.813	1613.12
COQ8A	640.621	9.19018e-06	0.000131571	0.611862	-1.63436	42.7166	69.8141
SYNE3	71.5626	9.1918e-06	0.000131571	1.82029	1.82029	9.16315	5.0339
SNHG4	21.394	9.22848e-06	0.000131946	0.460493	-2.17159	1.16564	2.5313
SCARB2	2790.78	9.25139e-06	0.000132124	1.75239	1.75239	254.449	145.201
ADGRG6	49.2778	9.45005e-06	0.000134808	1.84545	1.84545	3.83967	2.08061
RPS7	12373.3	9.50373e-06	0.00013542	0.61978	-1.61348	782.389	1262.37
RRP1	278.056	9.52991e-06	0.000135639	0.624522	-1.60123	20.8425	33.3736
TARBP1	264.432	9.61961e-06	0.000136761	0.619696	-1.61369	16.24	26.2065
SLC22A17	455.409	9.73287e-06	0.000138178	1.78666	1.78666	49.2422	27.5611
ZNF423	370.37	9.74122e-06	0.000138178	1.67562	1.67562	32.0267	19.1133
CD320	208.236	9.78031e-06	0.000138576	0.577771	-1.73079	15.7059	27.1836
KIAA1462	85.2856	9.80217e-06	0.00013873	0.574823	-1.73966	4.5045	7.83633
RPL7	10421.9	9.88807e-06	0.00013958	0.649499	-1.53965	658.949	1014.55
MEIS1-AS2	93.599	9.89031e-06	0.00013958	1.86822	1.86822	9.72356	5.20472
GPAT4	1228.65	9.89555e-06	0.00013958	1.64812	1.64812	114.168	69.2714
TOM1L2	146.171	9.92718e-06	0.00013987	1.72791	1.72791	14.523	8.40494
MTERF3	166.495	9.94878e-06	0.000140017	0.627198	-1.59439	13.4199	21.3966
ZFP90	615.327	9.98869e-06	0.000140357	1.59297	1.59297	61.3452	38.5099
NPW	24.5146	1.00136e-05	0.000140357	0.363376	-2.75197	1.48367	4.08302
LRRC58	584.917	1.00142e-05	0.000140357	0.637065	-1.5697	44.2017	69.3834
PDE2A	428.539	1.00176e-05	0.000140357	1.66824	1.66824	57.1514	34.2586
EFR3B	443.748	1.01131e-05	0.000141538	1.65344	1.65344	48.0482	29.0596
GNL3L	565.7	1.01389e-05	0.000141742	0.640235	-1.56193	39.0819	61.043
GFRA2	1662.56	1.01813e-05	0.000142176	1.72856	1.72856	273.341	158.132
RSL1D1	1744.4	1.02001e-05	0.000142281	0.616869	-1.62109	122.532	198.636
POLQ	224.388	1.0253e-05	0.00014286	0.644275	-1.55213	19.0615	29.5859
RPL7A	12538.4	1.03024e-05	0.000143252	0.652645	-1.53223	778.232	1192.43
GDPD5	56.8352	1.03117e-05	0.000143252	1.87449	1.87449	4.00879	2.1386
TMEM151A	31.0571	1.03153e-05	0.000143252	1.99103	1.99103	3.16593	1.5901
SMIM18	59.6623	1.03936e-05	0.000144181	1.77553	1.77553	5.13539	2.89231
RPL34	3517.33	1.04096e-05	0.000144243	0.637326	-1.56906	206.444	323.923
NHLRC4	17.1488	1.04907e-05	0.000145208	2.3997	2.3997	1.30823	0.545163
CREBRF	113.671	1.05694e-05	0.000146137	1.54683	1.54683	8.73452	5.64671
EML2	75.8976	1.06887e-05	0.000147624	1.72767	1.72767	5.12719	2.96769
SERINC1	3852.16	1.07298e-05	0.000148029	1.70939	1.70939	361.923	211.726
KLF10	395.294	1.07805e-05	0.000148565	1.64378	1.64378	39.7606	24.1885
CRAT	148.092	1.0835e-05	0.000149153	1.73943	1.73943	16.3998	9.4283
LRRC75B	31.9084	1.09053e-05	0.000149957	1.98357	1.98357	3.21639	1.62152
AASS	127.621	1.09386e-05	0.00015025	0.624664	-1.60086	8.83689	14.1466
MSRB2	116.61	1.09752e-05	0.000150548	1.62828	1.62828	13.4019	8.23074
RBFOX3	162.651	1.09842e-05	0.000150548	1.5583	1.5583	14.2688	9.15664
KCNN1	157.771	1.10275e-05	0.000150977	1.70814	1.70814	13.0911	7.66399
KLHL9	597.146	1.10955e-05	0.000151744	1.58665	1.58665	60.1261	37.8951
MRRF	206.258	1.11387e-05	0.000152169	0.665256	-1.50318	14.4503	21.7215
PLD3	966.843	1.12583e-05	0.000153635	1.83395	1.83395	96.4144	52.572
COL6A1	849.317	1.14373e-05	0.000155909	1.66747	1.66747	78.6272	47.1535
ISLR	25.7399	1.15449e-05	0.000157206	2.4118	2.4118	4.88539	2.02562
KCNH1	480.387	1.16318e-05	0.000158217	1.53331	1.53331	65.4826	42.7067
MACROD2	16.3227	1.16565e-05	0.000158383	2.35893	2.35893	1.87121	0.793246
BEST1	19.3433	1.17096e-05	0.000158933	2.66943	2.66943	1.63674	0.613141
MYH15	17.8333	1.17378e-05	0.000159144	2.33893	2.33893	2.02347	0.865127
ANKFN1	90.0111	1.17505e-05	0.000159144	1.83135	1.83135	4.73409	2.58502
CLIP3	156.06	1.17651e-05	0.000159171	2.60287	2.60287	12.4094	4.76758
ST7	252.6	1.17801e-05	0.000159203	1.67248	1.67248	23.1589	13.847
NOL4L	189.171	1.19601e-05	0.00016139	1.82543	1.82543	13.1985	7.23037
TCEAL7	398.051	1.19724e-05	0.00016139	1.53601	1.53601	34.6368	22.5498
2022-03-04	47.1934	1.1994e-05	0.00016139	2.29947	2.29947	6.61113	2.87507
CCDC58	129.314	1.19968e-05	0.00016139	0.642807	-1.55568	9.77667	15.2094
PTX3	156.544	1.20061e-05	0.00016139	0.573947	-1.74232	7.37512	12.8498
LINC02210-CRHR1	27.4762	1.20219e-05	0.00016143	3.06539	3.06539	3.22537	1.05219
SPRED3	26.9004	1.20417e-05	0.000161523	2.21226	2.21226	1.73841	0.785808
ZNF555	228.508	1.20959e-05	0.000162077	1.51968	1.51968	22.5692	14.8513
RIMBP2	152.658	1.21884e-05	0.000163016	1.56725	1.56725	18.8183	12.0072
KLC1	920.685	1.21919e-05	0.000163016	1.65175	1.65175	90.4053	54.733
NCAM2	43.0417	1.23905e-05	0.000165496	2.19506	2.19506	4.87691	2.22176
EPHA2	21.3811	1.24409e-05	0.000165993	0.304378	-3.28538	1.02108	3.35466
YPEL1	178.533	1.25432e-05	0.000167181	1.5671	1.5671	17.4812	11.1551
CEP152	254.083	1.26274e-05	0.000167989	0.642298	-1.55691	20.9197	32.57
TPTE2P1	37.2001	1.26306e-05	0.000167989	1.91874	1.91874	3.00279	1.56498
ATP6V0A1	755.059	1.26492e-05	0.00016806	1.59937	1.59937	65.3613	40.8668
RRP1B	1183.82	1.27155e-05	0.000168762	0.62106	-1.61015	83.716	134.795
PALD1	206.852	1.27488e-05	0.000169025	0.633768	-1.57786	14.3615	22.6605
GPR153	52.9381	1.29832e-05	0.000171952	1.93934	1.93934	4.50035	2.32056
DKK1	195.578	1.30607e-05	0.000172797	2.06546	2.06546	37.3173	18.0673
BAK1	119.093	1.3107e-05	0.000173148	0.609623	-1.64036	9.42957	15.4679
TEAD4	109.031	1.31147e-05	0.000173148	0.569371	-1.75632	8.87282	15.5836
TRANK1	120.726	1.31839e-05	0.000173878	0.571614	-1.74943	2.66823	4.66789
TMEM38B	104.706	1.33039e-05	0.000175277	0.619192	-1.61501	8.10337	13.087
SPOCK2	123.855	1.35869e-05	0.000178818	1.73186	1.73186	3.69203	2.13182
NUFIP1	169.175	1.3627e-05	0.000179158	0.645149	-1.55003	13.2491	20.5365
SMPD3	352.357	1.36499e-05	0.000179272	1.60526	1.60526	28.8136	17.9495
GRPEL1	295.272	1.37212e-05	0.000180021	0.6254	-1.59898	22.5762	36.0988
RHOU	1288.05	1.37895e-05	0.000180729	1.64982	1.64982	124.813	75.6528
RREB1	91.9637	1.3818e-05	0.00018076	0.526024	-1.90105	8.13706	15.469
GRK5	202.001	1.38206e-05	0.00018076	1.67346	1.67346	18.5868	11.1068
SLC26A11	98.1303	1.38534e-05	0.000181001	1.68651	1.68651	10.3377	6.12965
ANKS1B	131.599	1.39693e-05	0.000182326	1.55148	1.55148	10.0337	6.46715
ADAMTS7	235.594	1.4001e-05	0.00018255	1.54632	1.54632	20.282	13.1163
SHMT2	1241.26	1.40544e-05	0.000183057	0.582485	-1.71678	87.938	150.97
IGSF1	103.161	1.41726e-05	0.000184405	1.61047	1.61047	14.017	8.70369
MRPS23	825.825	1.42175e-05	0.000184798	0.663581	-1.50697	62.5315	94.2334
SLC27A2	18.036	1.42935e-05	0.000185594	0.382175	-2.6166	0.696464	1.82237
DNAJA3	351.167	1.43306e-05	0.000185884	0.623456	-1.60396	27.0768	43.4302
PHOX2A	681.272	1.44155e-05	0.000186792	1.68617	1.68617	115.499	68.498
EPHB6	35.1557	1.45583e-05	0.000188449	2.32601	2.32601	4.13228	1.77655
RTL8C	415.637	1.46377e-05	0.000189282	1.72477	1.72477	45.9697	26.6527
WDR12	445.147	1.46797e-05	0.00018963	0.617326	-1.61989	31.0055	50.2255
POLR1B	601.951	1.47974e-05	0.000190955	0.592025	-1.68912	43.9593	74.2524
GPR26	109.202	1.48131e-05	0.000190961	0.620708	-1.61106	7.76139	12.5041
KIDINS220	2431.47	1.48327e-05	0.000191018	1.59105	1.59105	218.628	137.411
WSCD1	79.1511	1.48718e-05	0.000191224	0.452553	-2.20969	4.31949	9.54472
NRXN2	92.3528	1.48791e-05	0.000191224	1.75799	1.75799	8.54212	4.85903
SLC7A14	543.591	1.50568e-05	0.000193311	1.66753	1.66753	64.7549	38.8328
XRCC3	165.519	1.52736e-05	0.000195842	0.653352	-1.53057	14.7233	22.535
RUNDC3A	575.175	1.52925e-05	0.000195842	1.59798	1.59798	68.0679	42.5962
CLEC2D	39.3076	1.53007e-05	0.000195842	0.570029	-1.7543	2.56759	4.50432
SEZ6	205.918	1.55393e-05	0.000198694	1.68708	1.68708	36.1534	21.4295
FAM208B	1130.58	1.55991e-05	0.000199076	0.641528	-1.55878	83.2743	129.806
TRIT1	78.485	1.5605e-05	0.000199076	0.634745	-1.57544	5.06503	7.97964
H1F0	176.301	1.56166e-05	0.000199076	1.64248	1.64248	20.1575	12.2726
CDCA7	336.827	1.5751e-05	0.000200586	0.662184	-1.51015	32.3521	48.8566
RTN4	2976.12	1.57964e-05	0.000200961	1.6009	1.6009	302.588	189.011
PRRT2	86.1388	1.58232e-05	0.000201098	1.83669	1.83669	8.16323	4.44452
ITM2B	835.645	1.596e-05	0.000202632	1.60382	1.60382	113.106	70.5227
C1QL3	73.0369	1.59877e-05	0.000202779	1.70905	1.70905	12.3879	7.2484
LTV1	357.808	1.60912e-05	0.000203886	0.645596	-1.54896	28.1916	43.6676
UACA	51.5055	1.61257e-05	0.000204085	0.560831	-1.78307	3.8976	6.9497
OPN3	88.2696	1.61393e-05	0.000204085	1.61829	1.61829	12.8603	7.94684
ZNF836	100.275	1.6217e-05	0.000204862	1.63542	1.63542	9.77629	5.97786
SLC39A14	478.119	1.62337e-05	0.000204867	0.621295	-1.60954	37.8253	60.8814
C16orf45	313.387	1.62994e-05	0.00020549	1.58244	1.58244	27.4148	17.3244
CYTH3	365.089	1.64107e-05	0.000206686	1.60239	1.60239	50.0835	31.2554
APBB3	104.734	1.64688e-05	0.00020721	1.64051	1.64051	9.20529	5.61123
UNG	797.133	1.65339e-05	0.000207822	0.630979	-1.58484	69.2713	109.784
TMEM5	123.129	1.67273e-05	0.000210042	0.636929	-1.57003	10.1369	15.9153
POLD4	30.3008	1.68037e-05	0.00021077	2.01326	2.01326	2.81436	1.39791
SRRM3	172.891	1.68187e-05	0.00021077	1.55113	1.55113	18.7181	12.0674
LBH	99.9809	1.684e-05	0.000210827	1.73154	1.73154	5.45201	3.14866
ESF1	363.362	1.69912e-05	0.000212509	0.63967	-1.56331	26.0333	40.6981
MALAT1	12869.9	1.71292e-05	0.000214021	1.75585	1.75585	1013.29	577.092
SYPL1	91.2471	1.72596e-05	0.000215437	0.614848	-1.62642	7.95682	12.9411
QPCTL	29.5821	1.73076e-05	0.000215822	0.502481	-1.99012	2.16993	4.31844
ANGEL1	125.56	1.74155e-05	0.000216952	0.615235	-1.62539	9.08721	14.7703
PKP4	282.746	1.76395e-05	0.000219335	0.61146	-1.63543	24.3545	39.8301
TENM4	621.15	1.76416e-05	0.000219335	1.78031	1.78031	79.0261	44.389
TIMM8A	92.5966	1.79531e-05	0.000222987	0.646608	-1.54653	7.05605	10.9124
LPCAT3	138.825	1.83645e-05	0.000227494	1.56248	1.56248	15.8606	10.1509
LINC00654	105.748	1.83825e-05	0.000227494	1.67723	1.67723	10.4635	6.23856
TTL	1353.11	1.83828e-05	0.000227494	1.59987	1.59987	146.377	91.4931
FAM89B	337.808	1.83883e-05	0.000227494	1.68956	1.68956	33.0514	19.5621
MIEF2	61.3504	1.84171e-05	0.000227627	1.77242	1.77242	6.48098	3.65657
RPS10	6696.1	1.84835e-05	0.000228106	0.652595	-1.53235	440.211	674.555
DUXAP8	140.898	1.84921e-05	0.000228106	0.60841	-1.64363	9.1661	15.0657
JAKMIP3	23.0433	1.85145e-05	0.000228158	2.12856	2.12856	1.78819	0.840092
ABTB1	17.1278	1.85337e-05	0.000228172	2.37973	2.37973	1.73276	0.728131
IMP4	398.307	1.87204e-05	0.000230244	0.628407	-1.59133	29.7284	47.3075
DHX34	176.583	1.88023e-05	0.000231026	0.652005	-1.53373	12.3812	18.9893
JAM3	783.937	1.89144e-05	0.000232176	0.631481	-1.58358	63.8741	101.15
MTHFD2	2852.86	1.90902e-05	0.000234046	0.655548	-1.52544	208.856	318.598
LINC01296	288.009	1.91039e-05	0.000234046	0.654736	-1.52733	19.3987	29.6283
CLN6	442.038	1.91794e-05	0.000234595	0.606934	-1.64763	35.0121	57.6868
MPPED2	152.859	1.9186e-05	0.000234595	1.71484	1.71484	10.3533	6.03749
PSMG4	45.2741	1.96111e-05	0.000239338	0.572993	-1.74522	3.09627	5.40369
SH3BGRL3	125.067	1.9612e-05	0.000239338	1.81778	1.81778	12.3025	6.76785
MTMR7	81.338	1.99191e-05	0.000242851	1.63768	1.63768	6.60769	4.03479
GTF3A	736.843	2.01092e-05	0.000244931	0.655829	-1.52479	60.2296	91.8373
SLITRK4	32.7762	2.01547e-05	0.000245249	0.525439	-1.90317	2.16204	4.11473
MEIS3	850.562	2.02302e-05	0.000245929	1.61419	1.61419	88.9742	55.12
EFNB3	136.864	2.02624e-05	0.000246082	1.75554	1.75554	14.4334	8.22161
USP32P1	61.38	2.0319e-05	0.000246532	0.55498	-1.80187	3.11432	5.6116
ADK	175.832	2.03938e-05	0.000247201	0.662831	-1.50868	14.4549	21.8078
KIFAP3	485.17	2.04286e-05	0.000247384	1.58126	1.58126	50.5564	31.9723
BCCIP	626.203	2.0492e-05	0.000247914	0.641605	-1.55859	47.9557	74.7433
SEMA6B	122.742	2.06705e-05	0.000249775	0.589374	-1.69672	5.86907	9.95813
ENOPH1	453.06	2.07019e-05	0.000249775	0.672994	-1.4859	35.173	52.2634
CCNDBP1	380.888	2.07054e-05	0.000249775	1.55874	1.55874	37.3659	23.972
PCMTD1	277.323	2.0735e-05	0.000249803	1.51048	1.51048	24.0316	15.91
SNRPB	1896.98	2.07475e-05	0.000249803	0.635734	-1.57298	154.455	242.955
TUBA1C	130.494	2.09925e-05	0.000252513	1.56533	1.56533	13.4373	8.58432
ST8SIA4	74.5285	2.12075e-05	0.000254854	1.69624	1.69624	6.49945	3.83167
CEP290	316.476	2.13716e-05	0.000256581	0.648528	-1.54195	23.9535	36.9352
AGPAT4	579.273	2.14152e-05	0.00025686	1.54083	1.54083	44.6224	28.96
DDX51	165.484	2.14716e-05	0.000257292	0.643281	-1.55453	12.5263	19.4725
CCDC3	594.706	2.15852e-05	0.000258268	1.67759	1.67759	99.186	59.1242
MAP3K14-AS1	14.082	2.15942e-05	0.000258268	2.39714	2.39714	1.22061	0.509195
TP53INP2	121.072	2.17492e-05	0.000259693	2.26259	2.26259	10.0781	4.45424
FCHO1	63.3477	2.17546e-05	0.000259693	1.71702	1.71702	5.58536	3.25294
GPRC5B	25.0365	2.19435e-05	0.000261494	0.494963	-2.02035	1.4072	2.84303
POLR1C	163.394	2.1947e-05	0.000261494	0.631222	-1.58423	12.3335	19.539
TMEM178B	376.009	2.21027e-05	0.000262899	1.62704	1.62704	35.0075	21.516
ZNF425	51.5356	2.21068e-05	0.000262899	1.81511	1.81511	4.81216	2.65117
HSD11B1L	45.5286	2.2355e-05	0.0002656	1.81454	1.81454	4.53999	2.50201
XPNPEP3	189.752	2.25339e-05	0.000267473	0.652781	-1.53191	13.7811	21.1114
ABCB6	237.413	2.26379e-05	0.000268455	0.638582	-1.56597	20.0296	31.3657
RPL31	6613.4	2.29396e-05	0.000271776	0.666822	-1.49965	407.735	611.461
ADSSL1	16.4704	2.31986e-05	0.000274586	2.23689	2.23689	1.80438	0.806647
DYNC2H1	178.566	2.33046e-05	0.000275582	0.668086	-1.49681	13.7477	20.5777
FAM20C	255.037	2.35013e-05	0.000277646	1.69468	1.69468	24.8542	14.6661
IGDCC4	83.9632	2.35521e-05	0.000277986	0.615074	-1.62582	4.92425	8.00595
RPS3	10039.3	2.37672e-05	0.000280262	0.660303	-1.51446	618.199	936.234
FHOD1	58.4501	2.40798e-05	0.000283434	0.588819	-1.69831	4.29332	7.2914
KIAA1841	174.822	2.40813e-05	0.000283434	1.52495	1.52495	18.8412	12.3553
PCDHGA4	26.3721	2.41076e-05	0.000283478	2.00051	2.00051	2.48117	1.24027
RIN1	18.2935	2.43099e-05	0.00028559	0.393319	-2.54246	1.07836	2.74168
CENPF	4082.12	2.44103e-05	0.000286502	0.637666	-1.56822	343.556	538.771
SYT9	25.8894	2.44553e-05	0.000286746	2.52971	2.52971	5.17283	2.04483
CPT1C	390.955	2.44767e-05	0.000286746	1.60312	1.60312	37.0289	23.0981
DDR1	526.196	2.46657e-05	0.000288691	1.67648	1.67648	38.8212	23.1564
SHC4	36.4711	2.50134e-05	0.00029249	1.77433	1.77433	3.33056	1.87708
CHRM1	42.0494	2.51027e-05	0.00029326	2.04727	2.04727	8.08626	3.94978
ZDHHC22	75.4954	2.51259e-05	0.00029326	0.586745	-1.70432	4.14266	7.06041
EEF1B2	5198.9	2.52696e-05	0.000294663	0.665216	-1.50327	372.173	559.477
BZW2	958.282	2.54081e-05	0.000296004	0.643768	-1.55335	71.19	110.583
TXLNGY	82.8154	2.55045e-05	0.000296852	0.570918	-1.75157	5.40581	9.46863
ARL8A	288.905	2.57434e-05	0.000299356	1.62293	1.62293	29.6385	18.2623
KLF9	47.1864	2.58786e-05	0.00030065	0.554255	-1.80422	3.0607	5.52218
RPS8	5223.3	2.5983e-05	0.000301585	0.663094	-1.50808	342.742	516.882
PPA1	1776.03	2.63597e-05	0.000305676	0.657144	-1.52174	117.836	179.315
CBX4	182.613	2.6426e-05	0.000306162	1.6296	1.6296	16.9023	10.3721
WBP1L	173.664	2.66549e-05	0.00030853	1.61664	1.61664	17.0467	10.5445
RCL1	249.471	2.68463e-05	0.00031046	0.654946	-1.52684	18.0519	27.5625
AIMP2	294.653	2.7062e-05	0.000312581	0.648305	-1.54248	24.2572	37.4164
RASL10B	249.015	2.70794e-05	0.000312581	0.60486	-1.65327	20.2867	33.5395
WDR74	320.068	2.72396e-05	0.000314141	0.636175	-1.57189	24.1182	37.9113
FKBP10	358.533	2.7702e-05	0.000319036	0.616925	-1.62094	28.2581	45.8048
PSMA5	715.046	2.77147e-05	0.000319036	0.667901	-1.49723	57.1162	85.516
RAB39B	192.445	2.79811e-05	0.000321808	1.5758	1.5758	18.5324	11.7607
LYST	281.29	2.8043e-05	0.000322226	1.51675	1.51675	22.0278	14.523
TBX2	883.749	2.82123e-05	0.000323747	1.63672	1.63672	106.508	65.0736
MAP7D3	157.826	2.82268e-05	0.000323747	0.651852	-1.53409	12.3195	18.8992
ATP6V0E2	457.375	2.8297e-05	0.000324256	1.55718	1.55718	43.2963	27.8043
TTLL7	303.324	2.83908e-05	0.000325035	1.46706	1.46706	27.831	18.9706
ATP2B4	549.919	2.84892e-05	0.000325864	1.73919	1.73919	61.4768	35.348
PPP2R2B	81.5005	2.87775e-05	0.000328863	1.62406	1.62406	7.71244	4.74887
GNAZ	236.968	2.90017e-05	0.000331125	1.63138	1.63138	23.9652	14.6902
PHB	3041.78	2.90587e-05	0.000331475	0.649447	-1.53977	244.233	376.064
CENPK	117.295	2.93314e-05	0.000334282	0.659882	-1.51542	9.95868	15.0916
IRGQ	1241.01	2.97701e-05	0.000338975	1.64521	1.64521	114.098	69.3512
FARSB	464.869	2.99984e-05	0.000341266	0.662943	-1.50842	37.8025	57.0222
TUB	657.356	3.01046e-05	0.000342164	0.671049	-1.4902	49.6745	74.0251
SHC1	1108.13	3.02528e-05	0.000343539	1.59762	1.59762	75.8671	47.4876
LZTS1	1277.57	3.03544e-05	0.000344296	1.62006	1.62006	101.566	62.6931
RRP7BP	75.6529	3.03742e-05	0.000344296	0.584099	-1.71204	4.96774	8.50496
SPON2	35.9633	3.06228e-05	0.000346801	2.12812	2.12812	2.7502	1.29232
SMPD1	72.4897	3.06864e-05	0.000347209	1.72136	1.72136	7.28195	4.23035
PLPP7	58.5929	3.07469e-05	0.00034732	1.71948	1.71948	5.41246	3.14774
TFRC	2473.4	3.07515e-05	0.00034732	0.618795	-1.61604	182.242	294.511
CACYBP	1466.23	3.09496e-05	0.000349244	0.67284	-1.48624	123.805	184.004
SLC35F2	164.312	3.10901e-05	0.000350516	0.629921	-1.5875	13.0672	20.7441
SHD	849.53	3.14144e-05	0.000353855	1.59777	1.59777	102.11	63.9079
GTF2H2	132.578	3.15234e-05	0.000354765	0.657531	-1.52084	10.7498	16.3487
HNRNPA1P10	1331.04	3.16305e-05	0.000355652	0.602093	-1.66087	94.8282	157.497
PLPPR4	345.059	3.1739e-05	0.000356554	1.54777	1.54777	48.0935	31.0728
KLHDC8A	179.532	3.17758e-05	0.000356649	1.60062	1.60062	16.1542	10.0924
MIAT	667.415	3.18177e-05	0.000356801	1.68131	1.68131	30.2573	17.9962
URB1	592.27	3.19722e-05	0.000358214	0.658259	-1.51916	45.3945	68.9615
MAGI2	71.3171	3.23161e-05	0.000361745	1.68544	1.68544	7.88056	4.67568
MRPL3	931.037	3.23989e-05	0.00036235	0.655911	-1.5246	70.5287	107.528
LGALS3	33.7906	3.24586e-05	0.000362694	1.83343	1.83343	3.66004	1.99629
NFS1	61.6413	3.26524e-05	0.000364536	0.606825	-1.64792	4.44282	7.32141
BAZ1A	920.268	3.2746e-05	0.000365033	0.651339	-1.5353	66.9542	102.795
ZSWIM5	70.7666	3.27612e-05	0.000365033	1.65818	1.65818	6.89588	4.15872
EIF5A	2567.55	3.28003e-05	0.000365033	0.638111	-1.56713	200.173	313.696
PES1	806.935	3.28129e-05	0.000365033	0.634327	-1.57647	59.946	94.5032
PARP9	142.46	3.29401e-05	0.000366124	1.73049	1.73049	19.719	11.395
AK1	288.076	3.3209e-05	0.000368787	1.56181	1.56181	28.0963	17.9896
TTYH2	213.997	3.32651e-05	0.000369084	0.631435	-1.58369	12.2532	19.4053
GTF2H2B	194.578	3.35887e-05	0.000372346	0.66415	-1.50568	14.454	21.7632
FLRT3	214.274	3.364e-05	0.000372587	1.5521	1.5521	38.4854	24.7957
NRM	137.789	3.3856e-05	0.00037465	1.61917	1.61917	18.3465	11.3308
ARHGEF10	147.998	3.43212e-05	0.000379464	0.660471	-1.51407	11.3106	17.1251
COLGALT2	40.4181	3.44582e-05	0.000380643	0.548356	-1.82363	2.88162	5.25501
LINC00693	33.5337	3.46514e-05	0.000382442	1.97609	1.97609	3.35092	1.69574
CD47	607.605	3.47064e-05	0.000382599	1.49249	1.49249	64.9382	43.51
PAXBP1	340.501	3.47353e-05	0.000382599	0.656374	-1.52352	23.5747	35.9166
SNHG1	342.321	3.47796e-05	0.000382599	0.668595	-1.49567	24.2475	36.2663
SVBP	75.6481	3.47873e-05	0.000382599	1.69277	1.69277	7.3749	4.35671
INAFM1	34.9811	3.48383e-05	0.000382826	2.21853	2.21853	2.83365	1.27726
CADM4	146.626	3.49362e-05	0.000383566	1.6304	1.6304	13.0809	8.02312
CRABP1	382.303	3.50058e-05	0.000383996	1.67843	1.67843	49.8776	29.7168
APLP2	2211.43	3.51407e-05	0.00038514	1.52295	1.52295	173.856	114.157
TMX4	782.019	3.52788e-05	0.000386316	1.52145	1.52145	107.562	70.6974
NCAM1	1063.69	3.54154e-05	0.000387476	1.74968	1.74968	128.58	73.4875
RPL41	9208.35	3.55241e-05	0.000388327	0.666657	-1.50002	657.85	986.789
DNAJB5	236.95	3.56271e-05	0.000389114	1.59287	1.59287	20.57	12.9138
HSPA9	2960.99	3.63838e-05	0.000397035	0.622096	-1.60747	227.521	365.734
MRM1	24.7904	3.64827e-05	0.000397769	0.468098	-2.13631	1.52494	3.25774
SLC45A3	34.7824	3.65998e-05	0.000398701	0.538798	-1.85598	2.00357	3.7186
LOC100129034	73.4375	3.67433e-05	0.000399917	0.573487	-1.74372	4.40278	7.67721
MIF	1852.2	3.67938e-05	0.000400121	0.652016	-1.53371	145.666	223.408
MAD2L1	993.129	3.69125e-05	0.000400986	0.673069	-1.48573	90.8538	134.984
FAH	58.9175	3.69371e-05	0.000400986	0.612688	-1.63215	4.80341	7.83989
KIF5C	2792.29	3.71088e-05	0.000402502	1.59532	1.59532	235.979	147.919
MTHFD1	982.501	3.72178e-05	0.000403337	0.642305	-1.55689	87.1393	135.667
MRPL17	274.07	3.72788e-05	0.000403651	0.680257	-1.47003	21.8917	32.1815
PDF	28.6263	3.73696e-05	0.000404286	0.467103	-2.14085	1.85675	3.97502
BACH2	183.077	3.74806e-05	0.000405138	1.7398	1.7398	15.0926	8.6749
CHEK2	135.536	3.75661e-05	0.000405714	0.665187	-1.50334	12.1846	18.3176
PRSS35	21.2828	3.79765e-05	0.000409794	0.410968	-2.43328	0.310196	0.754795
VGF	108.708	3.83673e-05	0.000413657	0.569926	-1.75461	6.39447	11.2198
PHKA1	109.397	3.8628e-05	0.000416111	0.620183	-1.61243	9.02631	14.5543
EPB41L2	446.298	3.87718e-05	0.000417302	0.689726	-1.44985	37.7161	54.6828
NUDT11	420.579	3.8853e-05	0.000417819	0.645722	-1.54865	29.6931	45.9843
IPO5	3277.87	3.89874e-05	0.000418906	0.64484	-1.55077	256.84	398.301
ABCD1	36.7261	3.9069e-05	0.000419425	1.97844	1.97844	3.59272	1.81593
LIMK1	297.733	3.92586e-05	0.000421101	1.57406	1.57406	29.2512	18.5833
PRKY	73.4893	3.93872e-05	0.000422121	0.637037	-1.56977	4.79545	7.52775
ULBP1	31.445	3.9837e-05	0.000426322	0.572406	-1.74701	1.58949	2.77686
ROBO2	39.7266	3.98552e-05	0.000426322	1.92018	1.92018	4.12993	2.1508
MTR	944.055	3.98809e-05	0.000426322	0.678062	-1.47479	77.3441	114.066
PRKCA	966.869	3.99233e-05	0.000426413	1.75578	1.75578	154.901	88.2234
SYT1	2791.42	4.00529e-05	0.000427435	1.63803	1.63803	304.436	185.855
CENPE	453.04	4.02387e-05	0.000429053	0.630052	-1.58717	39.0751	62.0188
RRAGB	139.793	4.04039e-05	0.000430451	1.62227	1.62227	14.3291	8.83274
TRNT1	246.588	4.06031e-05	0.000432206	0.688768	-1.45187	19.1216	27.7621
RCAN3	54.7381	4.07507e-05	0.000433411	1.59925	1.59925	6.04491	3.77983
BTG2	199.152	4.09109e-05	0.000434497	1.57141	1.57141	16.7026	10.629
UCK2	1088.44	4.09219e-05	0.000434497	0.677844	-1.47527	94.8368	139.91
ZNF772	528.532	4.10741e-05	0.000435745	1.52274	1.52274	49.8794	32.7564
NIP7	274.994	4.12138e-05	0.000436859	0.650835	-1.53649	22.0173	33.8293
GK	131.603	4.13383e-05	0.000437811	0.645182	-1.54995	11.0616	17.1449
RPL10A	5103.6	4.16329e-05	0.000440559	0.673432	-1.48493	336.507	499.689
CD59	528.785	4.1831e-05	0.000442108	1.50498	1.50498	55.9963	37.2073
FAM163A	132.914	4.18733e-05	0.000442108	1.61285	1.61285	17.9188	11.11
COA7	596.569	4.18847e-05	0.000442108	0.651623	-1.53463	45.9937	70.5832
NMB	17.7035	4.20324e-05	0.000443295	0.459565	-2.17597	1.11777	2.43225
LRRC4B	163.011	4.21149e-05	0.000443794	1.6677	1.6677	15.0568	9.02852
ZBTB46	265.264	4.24047e-05	0.000446237	1.5198	1.5198	21.3432	14.0434
CALM1	3628.19	4.24177e-05	0.000446237	1.56673	1.56673	343.008	218.933
NR2C2AP	83.7745	4.27477e-05	0.000449333	0.610577	-1.6378	7.00634	11.475
LINC01088	47.9749	4.28508e-05	0.000450041	1.78689	1.78689	3.85345	2.15651
PPP1R15A	175.927	4.29675e-05	0.00045089	1.56308	1.56308	13.2065	8.44903
OAF	16.9419	4.31512e-05	0.000452082	0.369045	-2.70969	1.04598	2.83429
MXD1	205.995	4.31529e-05	0.000452082	1.62701	1.62701	15.673	9.63303
CAPN5	61.0306	4.32525e-05	0.000452748	1.75791	1.75791	6.47534	3.68354
LINC00476	76.6693	4.33056e-05	0.000452927	1.7736	1.7736	8.55873	4.82564
MTMR9	645.226	4.33499e-05	0.000453013	1.52697	1.52697	61.1541	40.0493
NCR3LG1	172.215	4.37941e-05	0.000457276	0.658379	-1.51888	14.6812	22.299
COQ3	115.824	4.38844e-05	0.000457839	0.622435	-1.60659	8.69112	13.9631
TMSB4X	11592.3	4.44467e-05	0.000463321	1.48366	1.48366	1001.18	674.804
VAT1	866.593	4.45054e-05	0.000463549	1.69083	1.69083	75.4043	44.596
LOC101927497	117.852	4.47037e-05	0.000465229	1.54944	1.54944	15.6467	10.0983
KRBA2	105.786	4.47445e-05	0.000465269	1.57418	1.57418	8.69903	5.52606
TP53I3	304.788	4.50049e-05	0.000467591	1.59097	1.59097	34.1208	21.4465
GEMIN6	161.257	4.53718e-05	0.000471013	0.675381	-1.48065	12.5242	18.5439
PARD6A	40.6565	4.55364e-05	0.000472032	1.86079	1.86079	3.72973	2.00438
MRE11	262.143	4.5545e-05	0.000472032	0.660429	-1.51417	22.3941	33.9084
TPM1	728.866	4.56514e-05	0.000472746	1.50354	1.50354	77.8352	51.7681
GCFC2	342.813	4.62473e-05	0.000478523	0.685816	-1.45812	26.8297	39.1208
C2CD2	113.655	4.63299e-05	0.000478984	0.651246	-1.53552	8.16745	12.5413
ST3GAL3	50.0175	4.64133e-05	0.00047934	1.71605	1.71605	6.12772	3.57083
GABRB2	18.382	4.64647e-05	0.00047934	0.444839	-2.248	1.18398	2.66159
VAT1L	108.651	4.64787e-05	0.00047934	1.68152	1.68152	13.6625	8.12508
TCP11L1	291.108	4.66185e-05	0.000480388	1.58183	1.58183	27.767	17.5536
LOC100128239	21.0769	4.70346e-05	0.000484279	2.18464	2.18464	2.03807	0.93291
DLGAP2	14.4878	4.70889e-05	0.000484442	2.38941	2.38941	1.6583	0.69402
STXBP5	164.325	4.72799e-05	0.00048601	1.4943	1.4943	15.8003	10.5737
ANO4	64.9832	4.74102e-05	0.000486802	1.69568	1.69568	7.93537	4.67976
RPL11	3876.33	4.74343e-05	0.000486802	0.676952	-1.47721	249.795	368.999
ZNF699	109.718	4.77709e-05	0.000489856	1.54965	1.54965	11.4312	7.37661
UBXN8	66.7796	4.79413e-05	0.000491203	0.630347	-1.58643	4.64082	7.36233
CXCR4	115.802	4.81122e-05	0.000492545	1.75469	1.75469	16.8785	9.61908
MAPK8IP3	502.168	4.81506e-05	0.000492545	1.54322	1.54322	45.9082	29.7484
PIM1	224.589	4.82168e-05	0.000492822	1.6434	1.6434	26.678	16.2334
NCKAP5	43.5631	4.83073e-05	0.000493346	0.531923	-1.87997	1.86297	3.50232
POLR2H	286.62	4.89964e-05	0.000499978	0.680617	-1.46926	22.1393	32.5283
ASAP3	143.261	4.92046e-05	0.000501696	1.60901	1.60901	15.7947	9.81643
LGALS3BP	612.807	4.95586e-05	0.000504896	1.91466	1.91466	84.7807	44.2797
RUVBL1	819.626	4.96228e-05	0.000505141	0.660028	-1.51509	65.6668	99.4909
LOC100507557	31.3319	4.9698e-05	0.000505497	1.79654	1.79654	3.1987	1.78047
B4GALNT1	224.224	4.97942e-05	0.000506067	1.50106	1.50106	24.2698	16.1684
LIN28B	641.568	5.05224e-05	0.000512965	0.669767	-1.49306	49.261	73.5495
SNRNP48	147.935	5.05545e-05	0.000512965	0.660497	-1.51401	11.3456	17.1773
ADGRL1	846.513	5.06467e-05	0.000513487	1.57611	1.57611	83.9976	53.2943
MAT2A	1718.56	5.06903e-05	0.000513515	0.687994	-1.4535	129.051	187.576
PTDSS2	174.214	5.08536e-05	0.000514754	0.649849	-1.53882	12.3419	18.992
HRASLS	45.7652	5.10599e-05	0.000516319	0.602319	-1.66025	3.18936	5.29513
LOC100506990	45.6056	5.10902e-05	0.000516319	1.71698	1.71698	4.32097	2.51661
TMEM243	58.9638	5.11646e-05	0.000516655	0.608588	-1.64315	4.69501	7.71459
PHTF1	373.967	5.13239e-05	0.000517848	1.44255	1.44255	43.6392	30.2515
BRIX1	404.731	5.17188e-05	0.000521415	0.679861	-1.47089	34.7573	51.1242
RPL3	12123.9	5.22004e-05	0.000525849	0.658137	-1.51944	775.967	1179.03
NKAIN4	165.145	5.23446e-05	0.00052688	1.54893	1.54893	11.0645	7.14328
IARS	3477.74	5.2507e-05	0.000528092	0.649027	-1.54077	264.578	407.654
MYO18A	355.863	5.31952e-05	0.000534587	1.52947	1.52947	31.7169	20.7372
CACNB1	90.2898	5.3259e-05	0.0005348	1.68946	1.68946	7.34354	4.34667
ISL1	490.953	5.34803e-05	0.000536568	1.45853	1.45853	31.0322	21.2763
NBPF8	45.6479	5.35203e-05	0.000536568	0.599768	-1.66731	3.08055	5.13624
TXLNG	386.496	5.36514e-05	0.000537454	0.65286	-1.53172	29.5265	45.2264
MYCN	9063.32	5.38626e-05	0.00053914	0.675441	-1.48051	681.641	1009.18
RPL38	8858.96	5.40244e-05	0.00054033	0.68702	-1.45556	597.178	869.23
NCL	5248.73	5.40864e-05	0.00054052	0.62731	-1.59411	403.496	643.217
DDX47	734.896	5.42908e-05	0.000542132	0.6758	-1.47973	60.5552	89.6052
SHISA5	438.665	5.46068e-05	0.000544856	1.63148	1.63148	42.9574	26.3303
STOML2	886.113	5.53362e-05	0.000551696	0.67471	-1.48212	71.0235	105.265
MAPK8	1000.89	5.55196e-05	0.000553086	1.49259	1.49259	95.7237	64.1324
ANAPC7	839.852	5.57296e-05	0.000554739	0.672651	-1.48665	67.8959	100.938
ATAD3A	107.352	5.5824e-05	0.000555239	0.644249	-1.55219	7.94999	12.3399
PUS7L	355.277	5.59886e-05	0.000556437	0.701018	-1.4265	27.4111	39.1019
C1QTNF4	31.5437	5.6113e-05	0.000557233	2.02654	2.02654	3.65141	1.80179
CPE	1329.78	5.65043e-05	0.000560676	1.64248	1.64248	121.893	74.2131
LINC01829	222.517	5.67468e-05	0.000562638	1.51305	1.51305	19.6961	13.0175
SLC8A2	122.599	5.77252e-05	0.000571888	1.6128	1.6128	9.50483	5.89339
BOD1	570.453	5.81416e-05	0.000575561	0.68331	-1.46346	44.8987	65.7076
ANXA2P2	51.6845	5.83343e-05	0.000577015	1.65089	1.65089	6.40236	3.87812
HSPA4L	140.202	5.87467e-05	0.000580405	0.62723	-1.59431	8.99682	14.3437
NHP2	741.673	5.87749e-05	0.000580405	0.663213	-1.50781	56.5257	85.2301
COA4	311.939	5.88155e-05	0.000580405	0.690136	-1.44899	23.3043	33.7676
HDX	266.955	5.95411e-05	0.000587025	1.43339	1.43339	24.1156	16.8242
MAP1LC3B	392.983	5.96151e-05	0.000587025	1.5766	1.5766	24.832	15.7503
RNR2	13723.5	5.96263e-05	0.000587025	1.73802	1.73802	1036.08	596.126
DOCK10	229.745	6.0117e-05	0.000590854	0.655284	-1.52606	18.5767	28.3491
LYRM7	278.104	6.01282e-05	0.000590854	0.70217	-1.42416	20.9478	29.833
SEH1L	539.735	6.01561e-05	0.000590854	0.668698	-1.49544	42.5004	63.5569
ACTL6B	318.527	6.03753e-05	0.000592172	1.57982	1.57982	33.8146	21.4041
EIF3M	1275.01	6.03844e-05	0.000592172	0.689807	-1.44968	92.288	133.788
TXNDC5	1051.43	6.04317e-05	0.000592174	0.641611	-1.55858	89.6681	139.755
TRPC1	115.81	6.0527e-05	0.000592647	1.46192	1.46192	11.1953	7.65795
CASP3	626.041	6.06356e-05	0.000593248	1.62766	1.62766	37.1458	22.8216
CCDC181	51.2904	6.09524e-05	0.000595885	0.607784	-1.64532	3.48423	5.73267
PROKR1	92.919	6.1205e-05	0.000597889	1.72036	1.72036	12.5511	7.29564
MVB12B	416.405	6.14676e-05	0.00059917	1.53421	1.53421	38.6586	25.1977
WLS	483.279	6.1477e-05	0.00059917	0.642116	-1.55735	42.6869	66.4786
BAMBI	94.5912	6.148e-05	0.00059917	1.55061	1.55061	11.6369	7.50471
SNX5	303.055	6.15266e-05	0.00059917	0.680125	-1.47032	24.8458	36.5312
PROK2	14.6091	6.23998e-05	0.000607203	0.40653	-2.45984	0.832459	2.04772
OTUD6B	192.262	6.28067e-05	0.000610691	0.688923	-1.45154	15.1683	22.0174
NOP58	865.945	6.31515e-05	0.000613569	0.668673	-1.4955	68.5275	102.483
DDIT3	82.1711	6.32257e-05	0.000613816	1.56605	1.56605	4.44997	2.84153
GABARAP	1322.62	6.33517e-05	0.000614565	1.52236	1.52236	116.728	76.6758
U2SURP	1558.45	6.36175e-05	0.000616668	0.685319	-1.45917	119.448	174.296
PCAT7	31.9555	6.37026e-05	0.000617018	1.79495	1.79495	3.62207	2.01792
PLCB4	143.687	6.38169e-05	0.00061765	1.66105	1.66105	18.7747	11.3029
CDS2	815.476	6.39441e-05	0.000618405	1.52546	1.52546	78.7253	51.6074
EBNA1BP2	202.216	6.46111e-05	0.000623906	0.633386	-1.57882	16.8166	26.5503
RGS17	47.0563	6.46611e-05	0.000623906	1.64322	1.64322	5.09753	3.10216
KLHL28	401.084	6.46616e-05	0.000623906	1.46646	1.46646	35.0102	23.8739
NAGK	94.9188	6.47556e-05	0.000624334	1.58027	1.58027	10.6509	6.73992
SUN2	436.189	6.5187e-05	0.000628011	1.53846	1.53846	44.0579	28.6377
CDK5R2	48.4712	6.55807e-05	0.000631177	1.94158	1.94158	4.56611	2.35175
ZBTB4	120.269	6.56159e-05	0.000631177	1.56949	1.56949	11.1794	7.12295
HSPA1B	1597.96	6.66872e-05	0.000640992	0.629863	-1.58765	116.937	185.655
GPX8	39.534	6.72795e-05	0.000646191	0.540345	-1.85067	2.94971	5.45894
HADH	331.505	6.79177e-05	0.000651823	0.66586	-1.50182	28.8075	43.2636
ATL1	298.063	6.82054e-05	0.000654086	1.5039	1.5039	33.3269	22.1602
CLDN4	14.93	6.85893e-05	0.000657266	2.34993	2.34993	1.05506	0.448976
PDIA5	56.7154	6.90347e-05	0.000661031	0.59955	-1.66792	3.57328	5.95994
RASSF4	19.7145	6.91991e-05	0.00066196	2.25406	2.25406	1.89574	0.841036
S100A6	92.2494	6.9237e-05	0.00066196	1.58464	1.58464	10.6689	6.73268
DBF4	472.791	6.93425e-05	0.000662466	0.694686	-1.4395	42.6911	61.4538
ARHGAP33	47.2949	6.94432e-05	0.000662924	1.65857	1.65857	4.36191	2.62993
C14orf144	132.591	6.9853e-05	0.000666331	1.61399	1.61399	12.7355	7.89071
SLIT2	85.9763	6.99488e-05	0.000666739	1.5762	1.5762	9.84657	6.24704
WDR3	1169.74	7.04861e-05	0.000671352	0.649499	-1.53965	86.2768	132.836
TMEM97	1194.06	7.15288e-05	0.000680409	0.684144	-1.46168	100.333	146.654
SYP	1319	7.15451e-05	0.000680409	1.64694	1.64694	117.703	71.4681
ARMC6	425.929	7.18725e-05	0.000683006	0.650795	-1.53658	32.697	50.2417
ALG3	199.509	7.19621e-05	0.000683045	0.639363	-1.56406	14.1406	22.1168
SLC16A10	71.2831	7.20249e-05	0.000683045	0.603625	-1.65666	5.2548	8.70541
TYW3	288.253	7.20394e-05	0.000683045	0.637829	-1.56782	23.1097	36.2319
SOX11	5771.77	7.23999e-05	0.000685945	1.52355	1.52355	452.716	297.145
NEFH	562.715	7.25383e-05	0.000686531	0.665497	-1.50264	44.6471	67.0884
ZNF34	71.0135	7.25708e-05	0.000686531	1.63576	1.63576	7.54351	4.61163
CCND1	3976.37	7.33132e-05	0.000693033	1.52159	1.52159	463.062	304.329
MCCC2	250.835	7.34616e-05	0.000693915	0.603124	-1.65803	17.8098	29.5293
HS6ST2	186.6	7.35345e-05	0.000694081	0.642536	-1.55633	10.5294	16.3872
SNX15	151.883	7.44208e-05	0.000701837	1.63993	1.63993	18.0414	11.0013
MRPS15	214.2	7.44677e-05	0.000701837	0.684205	-1.46155	16.6766	24.3737
ADAMTS14	62.0899	7.47295e-05	0.000703777	0.633988	-1.57732	3.24366	5.11627
ZFAND3	291.462	7.49965e-05	0.000705365	1.5486	1.5486	28.691	18.527
ACY1	56.0306	7.50443e-05	0.000705365	0.587909	-1.70094	4.2282	7.19193
C7orf13	29.4462	7.50663e-05	0.000705365	1.86741	1.86741	2.54784	1.36437
IKBKB	102.285	7.5394e-05	0.000707916	0.661339	-1.51208	7.78404	11.7701
PMAIP1	295.343	7.58901e-05	0.000711754	0.688558	-1.45231	23.5936	34.2652
INTS13	395.801	7.59416e-05	0.000711754	0.6811	-1.46821	29.9674	43.9985
RANBP1	1216.32	7.59725e-05	0.000711754	0.68985	-1.44959	106.636	154.578
BCAS3	319.212	7.63351e-05	0.000714619	1.48699	1.48699	29.4015	19.7725
TSPAN17	244.777	7.64309e-05	0.000714984	1.53532	1.53532	24.2938	15.8232
ZNF254	215.181	7.6522e-05	0.00071503	1.41899	1.41899	17.8808	12.6011
KIAA2026	207.378	7.65495e-05	0.00071503	1.46439	1.46439	20.9166	14.2835
LIMD1	226.347	7.66843e-05	0.000715758	0.679924	-1.47075	16.1652	23.775
SMYD5	214.856	7.67473e-05	0.000715815	0.672691	-1.48657	17.1335	25.47
CASTOR2	863.409	7.68884e-05	0.0007166	1.54205	1.54205	79.244	51.3887
BRSK1	280.181	7.71701e-05	0.000718693	1.49677	1.49677	21.4945	14.3606
DNPEP	175.46	7.74181e-05	0.000720469	0.658816	-1.51787	12.9796	19.7014
RNF11	1090.42	7.83917e-05	0.000728991	1.48421	1.48421	100.959	68.0222
LOXL1	978.243	7.84774e-05	0.000729248	1.56004	1.56004	102.342	65.6022
EEF1E1	118.241	7.86016e-05	0.000729863	0.664451	-1.505	9.01923	13.5739
XPO5	1402.28	7.91018e-05	0.000733967	0.664671	-1.5045	105.591	158.861
CDON	243.371	7.94709e-05	0.000736848	0.615774	-1.62397	26.2878	42.6906
LSAMP	1112.46	7.98233e-05	0.000739571	1.50281	1.50281	127.086	84.5659
CACNA2D1	1126.8	8.05914e-05	0.000746138	1.4507	1.4507	117.511	81.0029
LTBP2	38.5075	8.14547e-05	0.000753575	1.64009	1.64009	4.11521	2.50914
SRFBP1	231.116	8.1522e-05	0.000753644	0.694319	-1.44026	17.6782	25.4612
MCC	1788.25	8.20343e-05	0.000757823	1.4582	1.4582	225.859	154.889
C11orf95	780.403	8.24833e-05	0.000761413	1.52476	1.52476	63.1735	41.4319
IQGAP2	20.3066	8.36922e-05	0.000772006	0.456642	-2.1899	1.23517	2.70489
B3GNT9	44.9978	8.38527e-05	0.000772795	1.74301	1.74301	5.31661	3.05024
EIF2A	721.53	8.39006e-05	0.000772795	0.700081	-1.42841	52.593	75.1242
TMEM255A	32.632	8.42765e-05	0.000775689	1.93723	1.93723	3.69069	1.90514
MITF	34.3017	8.44931e-05	0.000776979	0.557295	-1.79438	2.27651	4.08493
NFKB1	78.2771	8.45402e-05	0.000776979	0.566882	-1.76404	6.25765	11.0387
DCTN1	3491.5	8.47653e-05	0.00077848	1.51375	1.51375	325.229	214.85
RACK1	13203.3	8.5211e-05	0.000782002	0.672973	-1.48594	856.922	1273.34
SNRPF	612.799	8.57814e-05	0.000786663	0.69441	-1.44007	51.4385	74.0752
STAG3	14.6478	8.65994e-05	0.000793586	0.461903	-2.16496	0.932882	2.01965
HIST2H3D	1688.81	8.67475e-05	0.000794273	0.675893	-1.47952	160.197	237.016
PCDHB7	13.2804	8.68007e-05	0.000794273	2.45277	2.45277	1.67525	0.683005
2022-09-04	34.8169	8.7015e-05	0.000795656	1.85679	1.85679	3.23977	1.74483
CYB5D1	96.2791	8.71693e-05	0.0007964	0.672137	-1.48779	7.35472	10.9423
LRIG1	92.279	8.7223e-05	0.0007964	0.655115	-1.52645	6.20064	9.46497
LOC100419583	259.362	8.74435e-05	0.000797835	1.51194	1.51194	26.7221	17.674
PAK5	68.4634	8.75511e-05	0.000798238	1.58681	1.58681	4.38125	2.76104
PCLAF	609.516	8.77223e-05	0.000799219	0.702791	-1.4229	55.9046	79.5466
TOMM40	465.435	8.7927e-05	0.000800505	0.663975	-1.50608	37.9928	57.2202
RPL9	9942.41	8.84701e-05	0.000804867	0.6748	-1.48192	620.801	919.979
FAM126B	425.314	8.85515e-05	0.000805025	1.44877	1.44877	40.9874	28.2912
AHCY	2328.98	8.90821e-05	0.000809264	0.646025	-1.54793	174.202	269.652
CCKAR	168.544	8.99167e-05	0.000816256	0.580853	-1.72161	17.3396	29.852
APLF	111.678	9.04216e-05	0.000820248	1.46517	1.46517	11.8689	8.10068
TMEM59	2206.74	9.08672e-05	0.000823696	1.45726	1.45726	211.505	145.139
PACSIN3	56.3954	9.10366e-05	0.000824638	0.599197	-1.6689	5.05486	8.43606
DCTPP1	332.313	9.12772e-05	0.000825766	0.65788	-1.52003	27.9705	42.516
APBB1	734.929	9.12923e-05	0.000825766	1.54447	1.54447	71.2349	46.1226
SGSH	80.5779	9.2118e-05	0.000832635	1.51878	1.51878	8.21722	5.4104
TIMM10	164.822	9.2482e-05	0.000835326	0.673369	-1.48507	13.201	19.6044
FLOT2	289.77	9.28765e-05	0.000838287	1.51071	1.51071	30.1211	19.9384
HCN4	174.515	9.34196e-05	0.000842285	1.45102	1.45102	11.1046	7.65297
MRPL13	258.319	9.34534e-05	0.000842285	0.689238	-1.45088	21.1279	30.654
LOC642852	324.317	9.41833e-05	0.000848256	1.45498	1.45498	29.8266	20.4997
SLC25A25-AS1	37.5797	9.6508e-05	0.000868572	0.582211	-1.71759	1.97982	3.40053
SESTD1	395.437	9.68584e-05	0.000871102	1.46771	1.46771	44.5827	30.3758
ANXA2	4490.86	9.71248e-05	0.000872874	1.52809	1.52809	531.833	348.038
FASTKD3	134.553	9.80877e-05	0.000880899	0.664092	-1.50581	10.6571	16.0476
PIK3AP1	29.3345	9.85321e-05	0.000884259	0.511063	-1.9567	1.50673	2.94822
RNF19A	329.308	9.88812e-05	0.000886759	1.53097	1.53097	33.9924	22.2032
MPP3	203.609	9.90149e-05	0.000887326	1.58554	1.58554	21.9945	13.8719
DDX54	483.277	9.90987e-05	0.000887444	0.615166	-1.62558	37.4961	60.9528
THOP1	268.054	9.95156e-05	0.000890059	0.672963	-1.48597	21.4257	31.8379
RABEPK	615.858	9.95321e-05	0.000890059	0.658695	-1.51815	43.8299	66.5404
SSB	839.696	9.96676e-05	0.000890638	0.656579	-1.52305	64.3931	98.0737
FAM19A4	14.7083	9.98399e-05	0.000891544	0.410228	-2.43767	0.640991	1.56252
LINC00963	41.8683	0.000100035	0.000892656	1.69024	1.69024	3.26579	1.93214
RFC5	439.356	0.000100107	0.000892665	0.68573	-1.4583	42.3777	61.7994
CHGB	664.203	0.000100349	0.000893801	1.56873	1.56873	60.0522	38.2807
KCNJ6	65.1038	0.000100428	0.000893801	1.76387	1.76387	1.29141	0.732142
CAPN15	118.134	0.000100448	0.000893801	0.666768	-1.49977	8.44358	12.6634
P2RX5	30.7738	0.000101581	0.000903246	0.517697	-1.93163	2.10047	4.05733
ZNRD1	151.095	0.000101864	0.000905119	0.685969	-1.45779	12.0634	17.586
TMX1	475.574	0.000102135	0.000906888	0.705323	-1.41779	37.802	53.5954
GALNT12	22.6761	0.000102207	0.000906889	0.517382	-1.93281	1.53425	2.96542
KIAA1211	1036.13	0.000102398	0.000907947	1.48841	1.48841	87.1428	58.5474
MAN1A1	200.853	0.000103436	0.00091617	1.6515	1.6515	30.0303	18.1836
SFXN2	41.7169	0.000103542	0.00091617	0.6028	-1.65892	3.32971	5.52374
RPS15	3381.59	0.000103544	0.00091617	0.691368	-1.44641	250.804	362.766
RPS24	9301.61	0.000103647	0.000916439	0.698736	-1.43116	661.152	946.212
GADD45G	113.548	0.000103992	0.000918836	1.58747	1.58747	10.3946	6.5479
FABP5	1133.06	0.000104594	0.000923434	0.714248	-1.40007	99.5813	139.421
ARHGEF28	29.9589	0.0001047	0.000923434	2.40602	2.40602	6.42405	2.66999
FZD8	97.9474	0.000104732	0.000923434	0.607573	-1.64589	7.44236	12.2493
PHYH	163.37	0.000106091	0.000934757	1.45648	1.45648	16.9855	11.662
FAM167A	92.1936	0.000106304	0.000935577	1.79268	1.79268	15.0122	8.37414
ALG8	281.19	0.000106333	0.000935577	0.661291	-1.51219	22.2577	33.658
KLF12	379.573	0.000106928	0.000940164	1.49788	1.49788	43.0216	28.7217
FAM175A	159.933	0.000107355	0.000943251	0.697507	-1.43368	11.125	15.9496
ADSL	697.441	0.000108057	0.00094811	0.686497	-1.45667	56.2521	81.9408
HDDC2	506.359	0.000108058	0.00094811	0.697961	-1.43275	38.9528	55.8095
EVI5L	136.031	0.000108219	0.000948857	1.58118	1.58118	13.9786	8.84061
NANP	113.824	0.000108316	0.00094905	0.686051	-1.45762	10.0323	14.6232
ORMDL3	240.583	0.000109082	0.000954808	1.48511	1.48511	24.3368	16.3872
LOH12CR2	15.7192	0.000109125	0.000954808	2.09376	2.09376	1.62085	0.774132
FAM156B	215.818	0.000109499	0.000957412	0.686233	-1.45723	17.8046	25.9454
KATNB1	379.707	0.000110055	0.000961005	0.659773	-1.51567	26.3693	39.9672
ACTR3B	123.879	0.000110063	0.000961005	0.691068	-1.44704	9.66103	13.9799
CCSER2	547.539	0.000110972	0.000968272	1.42138	1.42138	47.6879	33.5504
FAM86EP	18.3305	0.000111178	0.000969402	0.502919	-1.98839	1.23185	2.4494
EXOSC2	542.815	0.000111402	0.000970123	0.704069	-1.42031	41.2653	58.6097
RAVER2	248.013	0.000111485	0.000970123	0.687274	-1.45502	20.4529	29.7595
PTPN2	139.633	0.000111492	0.000970123	0.691532	-1.44606	10.5623	15.2737
GIGYF1	280.633	0.000112035	0.000974174	0.692279	-1.4445	18.3189	26.4617
WRN	241.527	0.000112618	0.000978565	0.69186	-1.44538	18.4666	26.6912
TRPM7	976.594	0.000113601	0.000986423	0.7062	-1.41603	75.9895	107.603
FGFR1	369.763	0.000114042	0.000989397	1.52081	1.52081	49.4538	32.5181
UTP15	301.699	0.000114101	0.000989397	0.688552	-1.45232	24.4932	35.5721
EXOSC8	208.781	0.000114348	0.00099086	0.691516	-1.4461	18.4079	26.6196
KAT6B	572.638	0.000114475	0.00099128	1.44729	1.44729	54.8503	37.8985
RPS4X	9793.98	0.000114575	0.000991458	0.700608	-1.42733	645.925	921.949
TMEM63B	230.523	0.000114893	0.000993528	1.60832	1.60832	19.4742	12.1084
RPS14P3	33.0483	0.000115237	0.000995821	0.533813	-1.87331	1.86488	3.4935
POLR3K	150.218	0.00011591	0.00100095	0.680187	-1.47018	12.3739	18.192
SULF2	443.492	0.000116022	0.00100123	0.50756	-1.97021	42.6442	84.0182
ADGRA2	374.506	0.000116546	0.00100366	1.49334	1.49334	43.4686	29.1083
RPL14	4815.2	0.000116562	0.00100366	0.703651	-1.42116	333.497	473.953
USP18	18.6921	0.000116615	0.00100366	0.493178	-2.02767	1.3066	2.64934
WDR75	514.252	0.000116623	0.00100366	0.688419	-1.4526	40.2116	58.4116
SDCCAG8	219.422	0.000116847	0.0010049	1.44675	1.44675	21.418	14.8042
TRUB2	298.729	0.000117274	0.00100788	0.68465	-1.4606	22.206	32.4341
ZDHHC11	22.7905	0.000117671	0.00101061	0.48893	-2.04528	0.994548	2.03413
GRIN1	66.8035	0.000118022	0.00101293	1.58603	1.58603	4.90498	3.09261
JUND	422.602	0.000118222	0.00101386	1.54867	1.54867	39.3538	25.4114
RNF146	382.017	0.000118292	0.00101386	1.45624	1.45624	34.4036	23.625
ATG4C	107.38	0.000118433	0.00101438	0.680917	-1.46861	10.403	15.2779
MAP1LC3A	14.3438	0.000118612	0.00101522	2.49769	2.49769	1.27577	0.510781
TSPAN18	843.824	0.0001189	0.00101699	1.51118	1.51118	78.9016	52.2118
DPH1	223.145	0.000119012	0.00101719	0.68834	-1.45277	14.4356	20.9716
MAP2	1364.32	0.000119085	0.00101719	1.54365	1.54365	130.525	84.5559
TOX2	41.8527	0.000119859	0.00102311	1.70266	1.70266	4.37059	2.56692
TYSND1	114.057	0.000120133	0.00102475	0.634407	-1.57627	8.73375	13.7668
TBCK	319.33	0.000120223	0.00102482	1.43108	1.43108	30.7811	21.509
AGPAT5	936.316	0.000122071	0.00103988	0.686164	-1.45738	71.7631	104.586
DST	1719.96	0.00012317	0.00104812	1.46418	1.46418	128.641	87.859
DNAJC4	67.0101	0.000123205	0.00104812	1.63493	1.63493	6.28962	3.84702
AGTRAP	29.2833	0.000125095	0.00106348	0.507816	-1.96922	2.04131	4.01979
PPIP5K2	628.492	0.000125287	0.00106439	0.712305	-1.40389	42.9813	60.3411
PBLD	38.6148	0.000127018	0.00107837	1.64832	1.64832	3.79597	2.30294
MYO1E	40.0547	0.000128651	0.00109137	0.593338	-1.68538	2.24845	3.7895
CDC42	929.847	0.000128743	0.00109137	1.46649	1.46649	103.808	70.7864
HRH3	74.0612	0.000128816	0.00109137	0.628206	-1.59184	4.68009	7.44993
CAMK2N1	39.2373	0.000128896	0.00109137	1.76452	1.76452	2.65869	1.50675
SHMT1	119.792	0.00012902	0.00109151	0.662777	-1.5088	10.8111	16.3118
ZSWIM4	182.332	0.000129086	0.00109151	1.63762	1.63762	13.0833	7.98924
DEPDC1B	202.59	0.000129585	0.00109499	0.695357	-1.43811	19.1676	27.5651
LINC00294	206.745	0.000130871	0.00110511	1.57626	1.57626	18.7971	11.9252
IRF9	24.1905	0.000131231	0.00110741	1.82369	1.82369	2.88594	1.58248
SLIRP	428.505	0.000132365	0.00111623	0.706004	-1.41642	32.9293	46.6418
TEX19	29.8563	0.000132655	0.00111793	0.513078	-1.94902	1.98935	3.87728
SLC29A4	1276.18	0.000132858	0.00111889	1.54317	1.54317	140.001	90.7228
FANCB	115.037	0.000133259	0.00112084	0.686567	-1.45652	10.641	15.4989
RPL6	14544.9	0.000133268	0.00112084	0.687612	-1.45431	983.89	1430.88
NUP35	262.704	0.000134054	0.0011267	0.696512	-1.43573	22.9451	32.9428
GAL	721.652	0.000134535	0.00112999	1.57949	1.57949	92.9896	58.8731
CARF	89.2913	0.000137112	0.00115086	1.46585	1.46585	8.86266	6.04609
EPB41L1	188.07	0.000137389	0.00115242	1.64803	1.64803	17.4239	10.5726
TRMT13	117.664	0.00013824	0.00115878	0.674458	-1.48267	8.42982	12.4987
PARPBP	254.315	0.000138715	0.00116199	0.703216	-1.42204	25.864	36.7796
KCNT2	575.327	0.000138889	0.00116267	1.45777	1.45777	27.7659	19.0468
SCRT1	86.107	0.000139035	0.00116312	1.54586	1.54586	6.23559	4.03373
NAA50	1037.63	0.000139856	0.00116922	0.688361	-1.45273	85.863	124.735
IL17RA	203.434	0.000140109	0.00117055	1.48592	1.48592	19.797	13.3231
SECISBP2L	575.519	0.000141441	0.0011809	1.44925	1.44925	53.0587	36.6112
LOXL4	270.122	0.000141666	0.00118199	1.5598	1.5598	23.6465	15.1599
CUTC	89.0333	0.000141935	0.00118272	0.643552	-1.55387	6.7843	10.542
QTRT2	353.133	0.000141942	0.00118272	0.682239	-1.46576	28.5634	41.8671
CPSF4	166.305	0.000142046	0.00118281	0.700122	-1.42832	13.6396	19.4818
ZNF202	83.3866	0.000142746	0.00118758	0.669484	-1.49369	6.79198	10.1451
KIAA0232	672.739	0.000142807	0.00118758	1.44261	1.44261	64.9179	45.0004
SLC1A4	411.989	0.000144128	0.00119578	1.53816	1.53816	50.3674	32.7452
ARHGEF2	1838.62	0.000144186	0.00119578	1.52781	1.52781	160.49	105.046
PGF	501.949	0.000144205	0.00119578	1.57385	1.57385	52.9824	33.6641
HCG11	201.586	0.00014421	0.00119578	1.44764	1.44764	21.7237	15.0063
RNF103	245.341	0.000144269	0.00119578	1.45403	1.45403	22.9622	15.7921
SLC1A5	532.966	0.000144372	0.00119584	0.603094	-1.65812	42.6912	70.7869
MYCNOS	220.768	0.000144746	0.00119815	1.42197	1.42197	26.1413	18.3838
FSD1L	386.486	0.000145096	0.00120026	1.41324	1.41324	37.8113	26.755
TSFM	348.938	0.000145348	0.00120104	0.674612	-1.48233	27.6951	41.0534
PRDX6	1276.14	0.000145381	0.00120104	0.685338	-1.45913	106.814	155.856
PRDX1	1427.24	0.000146193	0.00120695	0.694325	-1.44025	108.49	156.252
SLC35G1	100.477	0.000147008	0.00121289	0.692661	-1.44371	7.43142	10.7288
AGAP6	41.8794	0.000149369	0.00123109	0.602149	-1.66072	2.64939	4.3999
PAX5	168.709	0.00014941	0.00123109	0.643796	-1.55329	12.8583	19.9726
EEF1G	17481.4	0.00014992	0.00123449	0.661208	-1.51238	1185.06	1792.27
RPS15A	6233.85	0.000150135	0.00123545	0.667971	-1.49707	394.683	590.869
THG1L	135.703	0.000151441	0.0012451	0.683985	-1.46202	10.909	15.9492
KLC4	128.947	0.000151506	0.0012451	1.55605	1.55605	12.4655	8.01099
IMPDH2	1486.97	0.000151831	0.00124695	0.67212	-1.48783	114.539	170.414
RPL19	9528.14	0.000152403	0.00125084	0.707968	-1.41249	644.936	910.967
PDK1	133.071	0.000152713	0.00125257	0.667444	-1.49825	10.754	16.1123
DDC	358.142	0.000152813	0.00125257	1.6576	1.6576	35.9393	21.6815
ALKBH2	278.347	0.000154679	0.00126704	0.684958	-1.45994	22.3885	32.686
ADCY7	228.477	0.000154817	0.00126734	1.46507	1.46507	23.711	16.1842
DCLK2	113.619	0.000154978	0.00126745	1.43889	1.43889	10.3735	7.20939
ITPRIPL2	583.828	0.000155031	0.00126745	1.57793	1.57793	57.7605	36.6054
UNC80	166.029	0.000156103	0.00127484	1.46673	1.46673	16.7194	11.3991
METTL13	715.387	0.000156214	0.00127484	0.685109	-1.45962	55.94	81.6512
CPEB3	58.0033	0.000156239	0.00127484	1.59013	1.59013	4.43104	2.78659
WASHC3	97.8119	0.000156439	0.00127564	1.46008	1.46008	10.1729	6.9674
ING4	195.818	0.000156702	0.00127696	1.45984	1.45984	16.7817	11.4956
DCLK1	480.981	0.000157297	0.00128098	1.42682	1.42682	44.0059	30.8419
METAP1D	38.6998	0.000157448	0.00128137	0.597629	-1.67328	2.62672	4.39524
PDP2	203.611	0.00015761	0.00128186	0.648344	-1.54239	14.0951	21.7402
DUSP16	406.891	0.000158048	0.0012846	1.55431	1.55431	38.0636	24.4891
NDFIP1	651.565	0.000159609	0.00129645	1.44521	1.44521	62.0647	42.9453
MPZ	17.8242	0.00016044	0.00130236	2.00417	2.00417	2.08394	1.0398
SEPT5-GP1BB	181.849	0.000161156	0.00130698	1.4285	1.4285	16.598	11.6192
UBE2L6	212.786	0.000161217	0.00130698	1.52137	1.52137	19.5765	12.8677
RAB30	1062.31	0.00016234	0.00131523	1.52905	1.52905	91.3237	59.7258
GRASP	98.5863	0.000163249	0.00132175	1.64952	1.64952	4.66418	2.8276
TMSB15B	162.666	0.00016407	0.00132755	1.41554	1.41554	16.638	11.7538
METTL16	437.165	0.000164219	0.0013279	0.679115	-1.4725	33.5716	49.4343
ZNF776	409.575	0.000164417	0.00132864	1.44987	1.44987	39.2557	27.0753
NUDT18	17.0778	0.000164592	0.0013292	2.09669	2.09669	1.66723	0.795171
PIK3C2B	330.343	0.000165081	0.0013323	1.48399	1.48399	27.7527	18.7014
COX14	124.089	0.000165216	0.00133253	0.693322	-1.44233	9.99836	14.421
NAA15	1033.54	0.000165653	0.0013352	0.679814	-1.47099	81.9014	120.476
TLX3	34.2045	0.000166335	0.00133979	1.87815	1.87815	3.45108	1.83748
TMEM39A	156.073	0.000166436	0.00133979	0.706084	-1.41626	12.3418	17.4792
NLN	480.234	0.000168535	0.00135582	0.704253	-1.41994	34.8077	49.4251
MOAP1	472.779	0.000169099	0.00135859	1.54673	1.54673	46.7691	30.2373
PI4K2B	130.839	0.000169196	0.00135859	0.698451	-1.43174	12.0412	17.2399
ABLIM1	698.268	0.000169202	0.00135859	0.656318	-1.52365	51.5151	78.4911
PRCD	16.5605	0.000169922	0.00136349	2.00524	2.00524	1.88211	0.938593
PLEKHG5	42.3989	0.000170366	0.00136618	1.59433	1.59433	3.89345	2.44206
MND1	62.3404	0.000170591	0.00136712	0.646377	-1.54708	5.66397	8.76264
BTG1	496.371	0.00017118	0.00137097	1.45625	1.45625	52.2526	35.8815
HSD11B2	30.6704	0.00017133	0.00137129	0.522008	-1.91568	0.683632	1.30962
KIAA1147	381.698	0.000171723	0.00137356	0.700929	-1.42668	28.4728	40.6215
RTL1	60.1676	0.000174049	0.00139128	1.77598	1.77598	2.45981	1.38505
MRPL11	389.222	0.000174338	0.00139271	0.692086	-1.44491	33.848	48.9072
SLC43A3	75.5649	0.000175177	0.00139852	1.49546	1.49546	9.03627	6.04247
DFNA5	128.545	0.000175869	0.00140245	1.58037	1.58037	13.2625	8.39206
CHCHD4	97.5327	0.000175892	0.00140245	0.66752	-1.49808	8.01566	12.0081
MEGF8	751.023	0.000176136	0.00140351	1.44582	1.44582	64.3041	44.4759
HLF	80.5708	0.000176463	0.00140523	0.675593	-1.48018	6.05884	8.96819
SCML2	309.526	0.000176889	0.00140773	0.677851	-1.47525	26.0739	38.4656
NDC1	1418.54	0.000178712	0.00142134	0.682878	-1.46439	129.777	190.045
RPS6KA3	383.064	0.00017968	0.00142813	0.691722	-1.44567	29.5172	42.672
ISOC2	115.996	0.000180181	0.00143121	0.684108	-1.46176	9.23796	13.5037
ADCY2	59.1308	0.000180831	0.00143547	1.72036	1.72036	6.03279	3.5067
PYCR1	1016.96	0.000181319	0.00143843	0.66128	-1.51222	78.2922	118.395
SPRN	70.1891	0.000182423	0.00144628	1.4641	1.4641	6.68609	4.56667
GLI3	73.8138	0.000183597	0.00145467	0.485204	-2.06099	5.31418	10.9525
TRIO	948.433	0.000183775	0.00145512	1.40915	1.40915	85.0154	60.331
PRKCH	50.2093	0.000183885	0.00145512	1.60168	1.60168	6.57837	4.10716
PEX5L	323.45	0.000184209	0.00145676	1.40808	1.40808	15.7034	11.1523
GGCT	393.878	0.000184826	0.00146073	0.674721	-1.48209	34.5392	51.1904
RNF138	425.017	0.00018561	0.00146514	0.727548	-1.37448	35.8174	49.2303
PCID2	275.966	0.000185617	0.00146514	0.698979	-1.43066	21.6224	30.9342
EIF3E	4894.05	0.000186139	0.00146834	0.709967	-1.40852	318.797	449.031
WDR5	433.565	0.000187426	0.00147756	0.6943	-1.4403	36.0728	51.9557
SMIM4	38.0016	0.000187542	0.00147756	0.619258	-1.61483	2.73194	4.41164
SLC2A13	38.622	0.000187899	0.001479	0.571076	-1.75108	2.97625	5.21165
GPN3	236.019	0.000187961	0.001479	0.700397	-1.42776	19.4161	27.7216
LOC284581	38.0914	0.000188865	0.00148519	0.632058	-1.58213	2.39729	3.79284
CPEB2	43.5791	0.000190652	0.0014983	1.82727	1.82727	2.19377	1.20057
TATDN1	183.007	0.000191586	0.00150471	0.708605	-1.41122	13.5953	19.186
CORO2A	122.425	0.000192576	0.00151153	1.57394	1.57394	12.89	8.18962
RPL18	5418.76	0.000194247	0.0015237	0.701866	-1.42477	362.859	516.992
CEBPB	33.3151	0.000194526	0.00152494	0.612091	-1.63374	2.18355	3.56737
PCDH18	60.3685	0.000195086	0.00152837	0.596646	-1.67604	4.5539	7.63251
PLPPR2	190.794	0.000195552	0.00153107	1.51233	1.51233	17.3123	11.4475
RFC3	552.726	0.000195689	0.00153119	0.709278	-1.40988	48.2891	68.082
RBMS1	350.428	0.000195891	0.00153182	1.45278	1.45278	38.1792	26.2801
SNORA74A	41.197	0.000197772	0.00154557	0.551276	-1.81397	2.299	4.17032
FKBP4	3143.86	0.000198452	0.00154992	0.661962	-1.51066	253.476	382.916
NCOA1	548.708	0.000198601	0.00155012	1.45091	1.45091	54.3275	37.4438
EGFR	105.885	0.00019882	0.00155087	1.48376	1.48376	14.6824	9.89543
SCN2A	23.823	0.000199	0.00155131	1.84115	1.84115	2.27595	1.23616
SIK1	94.8344	0.000199177	0.00155173	0.661039	-1.51277	3.1936	4.83119
TSPAN6	400.754	0.000199555	0.00155371	0.704493	-1.41946	30.8255	43.7555
ATXN1	147.775	0.000200737	0.00156195	1.57046	1.57046	20.006	12.739
GRIN3A	37.7042	0.000201444	0.00156648	1.71489	1.71489	4.74301	2.76579
PER1	113.612	0.000202236	0.00157167	0.639332	-1.56413	6.87797	10.7581
APIP	134.049	0.000202732	0.00157456	0.71258	-1.40335	10.9577	15.3775
ITPA	136.895	0.000203019	0.00157581	0.689293	-1.45076	9.9216	14.3939
KBTBD11	490.643	0.000203446	0.0015775	1.49815	1.49815	38.6667	25.8096
RGS3	203.427	0.000203488	0.0015775	1.51549	1.51549	17.4071	11.4861
FSTL4	337.629	0.00020423	0.00158148	1.54215	1.54215	19.1194	12.3979
RPS27A	8975.17	0.000204253	0.00158148	0.696343	-1.43607	610.314	876.456
FLNA	2792.09	0.000204836	0.00158502	0.700718	-1.42711	222.218	317.128
ECE1	270.05	0.000206079	0.00159366	1.47849	1.47849	28.7532	19.4477
NTPCR	304.15	0.000206849	0.00159771	0.699852	-1.42887	22.634	32.3412
EED	119.206	0.000206857	0.00159771	0.677708	-1.47556	10.2659	15.148
DISP2	233.011	0.000207182	0.00159924	1.53187	1.53187	22.9245	14.965
SPTBN4	137.705	0.000207505	0.00160075	1.52832	1.52832	11.3557	7.43015
AFF3	457.44	0.000208025	0.00160378	1.55037	1.55037	49.7712	32.1028
RND2	189.515	0.000209474	0.00161396	1.47452	1.47452	16.0547	10.8881
CENPX	194.249	0.000210876	0.00162377	0.707751	-1.41293	15.5084	21.9122
DPYD	212.884	0.000211181	0.00162512	1.39019	1.39019	30.3232	21.8123
EIF2S2	964.838	0.000214235	0.00164762	0.693977	-1.44097	76.5236	110.268
TCTA	110.787	0.00021472	0.00165034	1.49328	1.49328	10.1725	6.81221
ENTPD6	215.997	0.000215655	0.00165651	0.702175	-1.42415	15.46	22.0174
SRSF2	2617.93	0.000216858	0.00166409	0.718992	-1.39084	230.426	320.484
JAK3	39.6498	0.000216905	0.00166409	1.77966	1.77966	4.26615	2.39717
RBM24	16.4589	0.000217167	0.00166455	2.10733	2.10733	2.20856	1.04804
TGIF1	105.722	0.00021723	0.00166455	0.662648	-1.5091	9.38447	14.1621
ATR	399.923	0.000217591	0.0016663	0.717644	-1.39345	31.2778	43.584
POP1	496.174	0.000217825	0.00166707	0.681545	-1.46725	36.8208	54.0255
NCAPD3	639.957	0.000219286	0.00167724	0.694494	-1.4399	60.0863	86.518
SYN1	119.97	0.000219905	0.00168095	1.84335	1.84335	10.9375	5.93348
FAM229B	242.471	0.000220736	0.00168628	1.39245	1.39245	19.4064	13.9369
TMEM57	286.565	0.000221894	0.0016941	1.48	1.48	27.4357	18.5377
ZNF485	55.2971	0.000222079	0.00169448	0.639231	-1.56438	4.05962	6.35079
ZER1	253.224	0.000223373	0.00170332	1.5043	1.5043	24.0686	15.9999
SYNJ2	92.1775	0.000224121	0.00170799	0.641571	-1.55867	7.83584	12.2135
SDK1	305.247	0.000225148	0.00171477	1.47281	1.47281	24.9428	16.9354
SECTM1	45.6677	0.000225284	0.00171477	1.76687	1.76687	4.03965	2.28633
NOL8	396.258	0.000225913	0.00171853	0.720137	-1.38862	30.9412	42.9657
ATAD5	330.355	0.00022605	0.00171853	0.727077	-1.37537	29.2348	40.2086
CNBP	3155.15	0.000226891	0.00172377	0.707182	-1.41406	256.18	362.255
RPS6KA2	615.002	0.000227014	0.00172377	1.56418	1.56418	52.8304	33.775
BYSL	276.308	0.000227497	0.0017264	0.662679	-1.50903	20.4738	30.8955
GALM	42.2131	0.000228609	0.00173379	0.616562	-1.6219	3.61993	5.87115
ARL2	201.225	0.000230012	0.00174338	0.6757	-1.47995	15.4363	22.8449
ADCYAP1	69.3987	0.000231968	0.00175605	1.55252	1.55252	8.38552	5.40122
TECPR2	159.473	0.000232033	0.00175605	1.4683	1.4683	15.871	10.8092
NME1-NME2	166.414	0.000232103	0.00175605	0.647177	-1.54517	12.7648	19.7238
SNHG25	24.7894	0.00023309	0.00176246	0.502459	-1.99021	1.5097	3.00462
MYLK	134.937	0.000233642	0.00176557	1.45238	1.45238	13.4098	9.233
RIMKLA	187.463	0.000233901	0.00176647	1.43627	1.43627	20.2088	14.0704
HMBS	52.1582	0.000236017	0.00178138	0.656344	-1.52359	4.29351	6.54155
PCDHGB7	60.741	0.000236266	0.00178219	1.61091	1.61091	6.10404	3.78918
EME1	175.006	0.000236445	0.00178248	0.706352	-1.41572	17.4578	24.7155
CCDC138	239.552	0.000237006	0.00178564	0.716913	-1.39487	19.6727	27.4409
SATB1	2366.89	0.000237751	0.00179018	1.43574	1.43574	264.591	184.289
ZNF750	18.1508	0.000239198	0.00179917	2.00292	2.00292	1.30072	0.649414
L3HYPDH	41.8752	0.000239232	0.00179917	0.607877	-1.64507	2.64435	4.35013
SCO1	163.561	0.000239574	0.00180067	0.707116	-1.41419	13.1933	18.658
ZNF606	284.947	0.000239857	0.0018017	1.47791	1.47791	28.1546	19.0503
PTER	75.3931	0.000239997	0.0018017	1.5536	1.5536	12.4265	7.99853
ABCG4	14.0116	0.00024062	0.0018053	2.07055	2.07055	1.37662	0.664858
CHN2	89.1516	0.000240807	0.00180563	1.53321	1.53321	12.7026	8.28497
GNG12	634.569	0.000241202	0.00180751	0.703731	-1.421	55.2012	78.4408
LAP3	342.398	0.000242624	0.00181708	0.671922	-1.48827	27.3045	40.6365
SH3BP4	680.015	0.000242807	0.00181737	1.60007	1.60007	61.3184	38.3224
RPL23	7408.32	0.000243652	0.00182261	0.7158	-1.39704	462.662	646.356
RAMP1	161.03	0.000245152	0.00183274	1.7611	1.7611	23.1454	13.1426
NPTX1	595.798	0.000245836	0.00183676	0.635108	-1.57454	31.3059	49.2923
SPG20	562.648	0.000246301	0.00183914	0.680155	-1.47025	48.1319	70.766
AES	1185.39	0.00024732	0.00184465	1.46914	1.46914	137.351	93.4906
TOMM34	202.305	0.000247331	0.00184465	0.655221	-1.5262	14.8887	22.7232
LONP1	672.104	0.000248768	0.00185426	0.677572	-1.47586	50.5569	74.6147
SMIM10L2A	33.1047	0.00024898	0.00185474	1.6593	1.6593	3.06701	1.84838
LOC652276	61.7235	0.000250757	0.00186688	0.658699	-1.51814	3.83289	5.81888
CCDC59	265.617	0.000252321	0.00187741	0.715543	-1.39754	22.1668	30.979
PPID	520.294	0.000253114	0.0018822	0.681394	-1.46758	42.3968	62.2207
TSPO	120.615	0.000253292	0.00188241	0.632653	-1.58065	8.35584	13.2076
OIP5	76.9365	0.000254101	0.00188731	0.660636	-1.51369	6.81492	10.3157
OSR1	27.8773	0.000254551	0.00188953	1.71614	1.71614	3.80199	2.21544
MRPL30	857.087	0.000254911	0.00189109	0.715591	-1.39745	62.4239	87.2341
GAR1	64.4436	0.00025584	0.00189686	0.592954	-1.68647	4.87618	8.22354
INSR	523.036	0.000256053	0.00189717	1.43939	1.43939	52.4889	36.466
PLEKHG2	289.183	0.000256182	0.00189717	1.4486	1.4486	24.6626	17.0251
RPL13A	2419.73	0.000257124	0.00190302	0.702298	-1.4239	151.266	215.387
UBE2G2	391.981	0.000257704	0.00190619	0.715655	-1.39732	28.902	40.3853
COMMD8	61.8661	0.000258613	0.00191169	0.648683	-1.54158	4.86708	7.50302
USP35	86.574	0.000258752	0.00191169	1.49713	1.49713	8.05022	5.37711
CRACR2A	22.8377	0.000260612	0.00192431	0.540446	-1.85032	1.6373	3.02954
ZNF763	36.7463	0.000261008	0.0019261	1.63962	1.63962	2.90253	1.77024
NEDD4L	597.575	0.000261278	0.00192696	1.46603	1.46603	47.713	32.5456
GCSH	221.074	0.000262525	0.00193503	0.723593	-1.38199	18.0762	24.9812
LOC101929570	14.8015	0.000263917	0.00194331	2.39875	2.39875	1.22729	0.511635
E2F4	318.017	0.000263958	0.00194331	0.679525	-1.47162	25.1933	37.0749
C9orf16	230.76	0.000264208	0.00194402	1.49458	1.49458	20.749	13.8828
SPTBN1	3937.28	0.000266673	0.001961	1.47653	1.47653	404.107	273.687
C12orf29	240.548	0.000266993	0.00196221	0.71038	-1.4077	20.1236	28.3279
GPX3	27.4283	0.000267344	0.00196364	2.00874	2.00874	3.21734	1.60167
SCFD2	218.76	0.000267592	0.00196432	0.6962	-1.43637	17.6237	25.3141
ZNF491	89.3934	0.000267808	0.00196476	1.49105	1.49105	8.15198	5.46729
CXADR	812.122	0.000269022	0.00197252	1.46036	1.46036	81.0975	55.5325
SNORA71A	268.909	0.000269536	0.00197513	0.577207	-1.73248	15.8176	27.4036
KLF7	1164.46	0.000270003	0.00197658	1.51987	1.51987	123.48	81.2439
CBX6	627.23	0.000270283	0.00197658	0.684752	-1.46038	44.9018	65.5739
LOC102724532	17.0176	0.000270507	0.00197658	2.02219	2.02219	1.52714	0.755193
RPS27L	267.56	0.000270637	0.00197658	0.690418	-1.4484	19.2004	27.8099
CD248	111.675	0.00027066	0.00197658	1.52129	1.52129	14.7733	9.71107
CNTNAP3	17.0775	0.000270677	0.00197658	0.494422	-2.02257	0.850126	1.71944
HEATR3	293.893	0.000270899	0.00197706	0.704199	-1.42005	23.3001	33.0874
RPL37A	10563.7	0.000274679	0.00200348	0.71725	-1.39421	703.723	981.141
NAV1	1095.91	0.000277108	0.00202003	1.82044	1.82044	89.737	49.2942
RPL23A	5460.42	0.000277764	0.00202364	0.725195	-1.37894	388.952	536.341
SERTAD1	33.9845	0.000279345	0.00203398	1.73552	1.73552	3.78414	2.18041
TRMU	84.5055	0.000280555	0.00204161	0.671833	-1.48847	6.09254	9.06854
SCD5	439.109	0.000281269	0.0020446	1.47468	1.47468	49.9718	33.8864
ZBTB41	624.959	0.000281291	0.0020446	1.38559	1.38559	60.9959	44.0216
TTTY15	254.418	0.000282998	0.00205582	1.3962	1.3962	23.4651	16.8065
CRABP2	334.175	0.000287042	0.00208399	1.49676	1.49676	51.6134	34.4834
HSPA12A	393.315	0.000287875	0.00208884	0.697485	-1.43372	25.9789	37.2465
ACE	71.2064	0.000288729	0.00209382	0.593866	-1.68388	5.25175	8.84333
GINS4	104.76	0.000288961	0.0020941	0.692457	-1.44413	9.91272	14.3153
RPL36A	4508.3	0.000289099	0.0020941	0.717699	-1.39334	301.79	420.497
SARS2	98.9755	0.000290397	0.00210229	0.67439	-1.48282	7.83089	11.6118
EIF2B5	421.262	0.000292035	0.00211277	0.707767	-1.41289	31.7981	44.9274
PLEKHA7	36.8308	0.00029218	0.00211277	0.621531	-1.60893	2.24976	3.6197
TIMM17B	330.585	0.000294789	0.00212988	0.689827	-1.44964	25.323	36.7092
SLC16A1	2713.82	0.000294886	0.00212988	0.679555	-1.47155	226.397	333.155
PAQR8	136.541	0.000295802	0.00213527	1.43116	1.43116	16.3189	11.4025
EPB41L3	1116.36	0.00029624	0.00213721	1.49099	1.49099	70.9772	47.604
DGCR5	91.5973	0.000299225	0.0021575	1.44434	1.44434	9.33627	6.46403
ZNRF1	159.313	0.000299827	0.00216061	1.46881	1.46881	14.8683	10.1227
TICRR	546.86	0.000301605	0.00217218	0.700268	-1.42803	50.4026	71.9762
BCAR1	322.671	0.000302751	0.00217919	1.49924	1.49924	30.0544	20.0464
PDE5A	623.685	0.000303413	0.0021827	1.39446	1.39446	80.744	57.9034
PJA1	457.228	0.000305126	0.00219377	1.53539	1.53539	46.1278	30.0431
HIBCH	114.316	0.000305723	0.0021968	0.680694	-1.46909	9.69088	14.2368
CDKN2C	798.088	0.000309242	0.0022204	1.40576	1.40576	91.9251	65.3917
FAM104B	84.9245	0.000309526	0.0022204	0.699727	-1.42913	7.107	10.1568
PPT1	400.279	0.000309536	0.0022204	0.681227	-1.46794	33.5264	49.2147
PIGW	126.578	0.000311038	0.0022279	0.678566	-1.4737	11.1351	16.4098
LARP4	1079.15	0.000311076	0.0022279	0.71501	-1.39858	87.1725	121.918
LOC100506548	585.975	0.000311289	0.0022279	0.714184	-1.4002	33.4675	46.8612
STK3	92.8767	0.00031129	0.0022279	0.692992	-1.44302	8.48957	12.2506
2022-09-05	279.705	0.000312342	0.00223416	1.49835	1.49835	26.4464	17.6503
ANAPC1	861.968	0.000312842	0.00223647	0.704502	-1.41944	69.6548	98.8711
TEN1-CDK3	39.7904	0.000313732	0.00224155	0.483261	-2.06928	2.51458	5.20336
DYNC1I1	20.8143	0.000315594	0.00225358	0.528757	-1.89123	0.584323	1.10509
CHAC2	110.123	0.000316108	0.00225597	0.692638	-1.44376	9.66695	13.9567
ABCC9	20.0015	0.0003163	0.00225606	0.493117	-2.02792	0.717178	1.45438
TMEM14A	207.488	0.000316557	0.00225661	1.41746	1.41746	20.119	14.1937
UGT8	145.869	0.000317226	0.0022601	0.698959	-1.4307	12.7951	18.306
CPT1B	47.8613	0.000318403	0.0022672	0.570152	-1.75392	2.80146	4.91353
TMSB10	11405.3	0.00031866	0.00226775	1.40749	1.40749	1183.45	840.821
PODXL	246.782	0.000320866	0.00228216	1.38139	1.38139	24.1482	17.4811
TACC2	163.297	0.000321552	0.00228574	1.45662	1.45662	11.9905	8.23169
C1orf109	106.48	0.00032443	0.0023049	0.698915	-1.43079	8.40161	12.0209
SQLE	1594.82	0.000324629	0.00230501	0.714298	-1.39998	147.603	206.641
PRMT5	894.793	0.00032915	0.0023358	0.694739	-1.43939	70.5212	101.508
MAN2B2	97.9779	0.000330355	0.0023414	1.51056	1.51056	8.5559	5.66404
XYLB	67.3442	0.000330441	0.0023414	0.654269	-1.52842	5.10369	7.80061
ZFP28	191.62	0.000330573	0.0023414	1.41787	1.41787	19.262	13.5852
MGAT4B	262.266	0.00033084	0.0023414	1.40891	1.40891	27.965	19.8487
LOC101927661	110.904	0.000330871	0.0023414	1.59837	1.59837	11.1462	6.97346
TERF2IP	765.843	0.000331365	0.00234358	1.46661	1.46661	58.5513	39.9228
SHC3	41.9674	0.000332335	0.00234744	1.62148	1.62148	3.00176	1.85125
ST6GAL2	267.668	0.000332391	0.00234744	1.44845	1.44845	36.6292	25.2885
MAP1A	2473.88	0.00033247	0.00234744	1.5557	1.5557	163.975	105.402
BOC	43.5403	0.000332796	0.00234842	0.598832	-1.66992	3.83097	6.39741
MIR137HG	71.6681	0.000333119	0.00234938	1.83624	1.83624	7.34516	4.0001
DNER	92.2527	0.000334402	0.00235711	1.63062	1.63062	9.27295	5.68676
ABRACL	156.359	0.000334672	0.00235769	0.707259	-1.41391	11.5173	16.2845
KNOP1	257.032	0.000334939	0.00235826	0.706924	-1.41458	21.9045	30.9856
SLC4A5	247.127	0.000335381	0.00236005	0.697287	-1.43413	17.6963	25.3787
KLF13	1365.36	0.000335773	0.00236039	1.45137	1.45137	146.76	101.118
BMS1P14	33.2037	0.000335806	0.00236039	1.6846	1.6846	2.46437	1.46288
LYRM4	273.183	0.000337109	0.00236823	0.720714	-1.38751	21.124	29.3098
SENP7	244.362	0.000337681	0.00237093	1.40315	1.40315	23.0571	16.4324
C8orf58	42.8195	0.000338048	0.00237218	1.60684	1.60684	3.94943	2.45789
RTN3	931.418	0.000338409	0.00237339	1.44791	1.44791	94.8159	65.4846
DNM3	51.7406	0.000340887	0.00238944	1.57022	1.57022	4.58273	2.91853
KCTD7	128.778	0.000342181	0.00239578	1.45512	1.45512	12.3508	8.48782
SLC19A2	138.118	0.000342324	0.00239578	0.714498	-1.39958	11.7396	16.4305
PSMB10	38.8368	0.000342362	0.00239578	0.621634	-1.60866	2.92431	4.70423
TMED5	447.381	0.000344265	0.00240775	0.722504	-1.38407	37.7126	52.1971
COQ2	62.05	0.000345594	0.0024157	0.671734	-1.48869	5.61493	8.35887
CYTH2	523.899	0.000347014	0.00242428	1.42289	1.42289	44.3939	31.1997
ARL6IP1	2847.31	0.000348167	0.00243098	1.45281	1.45281	315.936	217.465
PLEKHG1	14.361	0.000351225	0.00245014	2.27445	2.27445	1.7506	0.76968
ADGRL3	530.924	0.000351299	0.00245014	1.38983	1.38983	41.7945	30.0717
CHD5	51.5793	0.000351579	0.00245073	1.63797	1.63797	4.67214	2.8524
SARAF	1268.34	0.000356484	0.00248354	1.43345	1.43345	122.499	85.4575
PCGF5	101.132	0.000357397	0.00248853	0.666666	-1.5	8.93776	13.4067
RPL24	5082.63	0.000358214	0.00249284	0.708018	-1.41239	333.967	471.693
ORC1	477.838	0.000360035	0.00250412	0.694288	-1.44032	47.6443	68.6233
CCDC157	34.1538	0.000361366	0.002512	1.63608	1.63608	3.41776	2.08899
ACAP3	202.417	0.00036178	0.00251215	1.49133	1.49133	16.5161	11.0747
PEX3	112.818	0.000361787	0.00251215	0.693088	-1.44282	9.11115	13.1457
AP1S3	29.5512	0.000362553	0.00251601	0.616079	-1.62317	2.02844	3.2925
STAT5B	401.691	0.000362763	0.00251601	0.715003	-1.3986	32.4424	45.3738
RPL35A	4418.27	0.000362944	0.00251601	0.724671	-1.37994	300.338	414.447
RABGGTB	644.968	0.000364129	0.00252284	0.725364	-1.37862	51.1589	70.5285
TBRG4	432.766	0.000367053	0.0025417	0.712207	-1.40409	35.8561	50.345
HHEX	20.6465	0.000369361	0.00255627	0.516394	-1.93651	1.57558	3.05112
VSTM2A-OT1	18.2463	0.00037053	0.00256295	1.94071	1.94071	2.23673	1.15253
GLO1	1810.06	0.000371525	0.00256843	0.71132	-1.40584	162.55	228.519
PAOX	17.6246	0.000371904	0.00256963	2.09398	2.09398	1.89437	0.904676
IMPDH1	366.663	0.000373442	0.00257884	0.681854	-1.46659	27.2292	39.934
FBXL2	107.845	0.000373755	0.00257959	1.42571	1.42571	9.93013	6.96503
PLAGL1	63.5581	0.000374693	0.00258464	0.611687	-1.63482	4.85356	7.9347
LGALS8	39.7171	0.00037603	0.00259245	0.615667	-1.62425	2.52881	4.10743
HERC3	80.4609	0.000377131	0.00259861	1.44587	1.44587	8.33057	5.76162
HAND1	155.782	0.000379961	0.00261667	1.49186	1.49186	27.4468	18.3978
CIB2	88.5241	0.000381379	0.00262501	1.48297	1.48297	9.76484	6.58466
LOC150776	95.9184	0.000382476	0.00263112	0.698218	-1.43222	6.8352	9.7895
FAM72C	192.913	0.000382748	0.00263155	0.687765	-1.45398	16.9198	24.6011
LOC100130691	17.9848	0.000384786	0.00264412	1.88484	1.88484	1.83134	0.971614
ZNF396	17.5968	0.000386281	0.00265294	1.8738	1.8738	1.71147	0.91337
DESI1	312.048	0.00038851	0.00266618	0.708505	-1.41142	20.4654	28.8853
SPTAN1	2171.99	0.000388632	0.00266618	1.39804	1.39804	205.845	147.238
RAD50	462.742	0.000390674	0.00267872	0.694306	-1.44029	35.0488	50.4804
PPP2R2A	404.768	0.000391303	0.00268157	0.654728	-1.52735	28.357	43.3111
FAM216A	226.185	0.000392485	0.00268821	0.705118	-1.4182	17.4528	24.7516
FGFR2	182.491	0.000393061	0.00269069	0.657249	-1.52149	17.5244	26.6633
EEPD1	499.215	0.00039341	0.00269161	1.41832	1.41832	59.5973	42.0196
ABCA3	536.401	0.0003944	0.00269592	1.47471	1.47471	55.7947	37.8345
SNRPD2	1720.51	0.000394468	0.00269592	0.72471	-1.37986	143.484	197.989
HBP1	331.733	0.000395337	0.0027004	1.37462	1.37462	28.2651	20.5622
SLC41A2	60.9012	0.000395998	0.00270345	1.60982	1.60982	6.88628	4.27767
TRIM65	250.611	0.00039763	0.00271311	0.707446	-1.41354	20.9752	29.6492
POLR3H	404.352	0.000401182	0.00273587	0.725153	-1.37902	31.7166	43.7378
AK6	119.349	0.000403409	0.00274956	0.711919	-1.40465	9.30335	13.068
DPYSL2	5317.19	0.000404676	0.0027567	1.51853	1.51853	585.188	385.364
RPL7L1	1809.37	0.000405332	0.00275857	0.696453	-1.43585	130.814	187.829
CLASP2	1162.43	0.000405389	0.00275857	1.39629	1.39629	100.748	72.1543
TMEM177	145.668	0.000405759	0.0027596	0.699707	-1.42917	11.0063	15.7299
RBMXL1	453.939	0.000406588	0.00276374	0.719416	-1.39002	37.3918	51.9753
CAMTA1	181.444	0.000406836	0.00276394	1.38073	1.38073	18.2367	13.208
JPH3	82.6973	0.000407982	0.00277023	1.48987	1.48987	9.42848	6.32841
LOC101927751	63.4191	0.000410461	0.00278555	1.50719	1.50719	6.91324	4.58686
RSL24D1	1777.32	0.000411028	0.0027879	0.7256	-1.37817	132.458	182.55
ADAMTS4	625.68	0.000412106	0.0027937	1.53125	1.53125	39.077	25.5197
C12orf45	104.097	0.000413629	0.00280252	0.701907	-1.42469	7.29329	10.3907
PAFAH1B1	1822.52	0.000414375	0.00280606	1.42997	1.42997	182.844	127.866
NABP1	38.6358	0.000414961	0.00280852	0.645486	-1.54922	2.9045	4.4997
CTSB	566.666	0.000417857	0.0028266	1.46642	1.46642	60.2019	41.0536
LINC01976	45.9688	0.00041993	0.00283909	0.631006	-1.58477	4.21046	6.67261
NAP1L3	211.55	0.000420604	0.00284212	1.40755	1.40755	21.122	15.0062
NEURL1B	154.544	0.000421311	0.00284538	1.63611	1.63611	20.5756	12.5759
ORC5	238.97	0.000422743	0.00285279	0.726185	-1.37706	19.6698	27.0864
TNPO2	962.894	0.000422863	0.00285279	0.710237	-1.40798	68.6884	96.7121
ST3GAL4	64.7355	0.000423218	0.00285302	0.668837	-1.49513	5.35723	8.00977
PALB2	216.288	0.000423349	0.00285302	0.719259	-1.39032	17.7759	24.7142
STMN3	1178.4	0.000424551	0.00285958	1.48467	1.48467	126.231	85.0229
SUSD1	337.597	0.000428765	0.00288606	1.41294	1.41294	35.1967	24.9103
NOL11	1636.75	0.000428941	0.00288606	0.717053	-1.3946	137.555	191.834
SORCS1	665.142	0.000431255	0.00289911	1.4073	1.4073	68.7486	48.8514
POLG2	157.889	0.000431342	0.00289911	0.725169	-1.37899	12.1291	16.7259
PDE4A	24.678	0.000432906	0.00290807	0.459629	-2.17567	1.1357	2.47091
MICU2	140.508	0.000433371	0.00290883	0.717192	-1.39433	11.1863	15.5974
TRIP4	162.538	0.000433697	0.00290883	1.42172	1.42172	15.2835	10.75
QKI	647.238	0.000434062	0.00290883	0.713473	-1.40159	62.9447	88.2229
HMGN3-AS1	34.5516	0.000434118	0.00290883	1.61663	1.61663	3.46788	2.14513
MAST4	37.6731	0.000434329	0.00290883	1.72129	1.72129	5.64138	3.27741
ZNF141	652.599	0.000434406	0.00290883	0.73864	-1.35384	50.529	68.4081
METAP1	324.953	0.000437109	0.00292383	0.723947	-1.38132	25.7835	35.6152
SNRPD1	934.253	0.000437111	0.00292383	0.725668	-1.37804	79.4892	109.539
CHD9	1772.09	0.000438038	0.00292848	1.35637	1.35637	152.729	112.601
BMPR2	776.882	0.000441364	0.00294915	1.53788	1.53788	69.9322	45.473
NEMP1	554.507	0.000450398	0.00300792	0.705125	-1.41819	52.3269	74.2094
STX5	118.199	0.000452237	0.00301859	1.40883	1.40883	12.4413	8.83095
SNHG7	323.942	0.000453132	0.00302296	0.739744	-1.35182	22.9044	30.9626
RPL4	23903.6	0.000454302	0.00302916	0.7042	-1.42005	1630.28	2315.09
CLNS1A	990.1	0.000455025	0.00303238	0.708489	-1.41145	80.0484	112.985
AP1S2	195.635	0.000455498	0.00303392	1.37664	1.37664	21.1457	15.3603
LOC100289230	28.6335	0.000459675	0.0030589	1.85582	1.85582	2.99467	1.61366
MINDY3	327.414	0.000459735	0.0030589	1.38959	1.38959	30.9849	22.298
RPS21	2265.13	0.00046065	0.00306337	0.696919	-1.43489	157.197	225.56
SYNCRIP	3338.16	0.000461165	0.00306518	0.713139	-1.40225	268.008	375.815
RPL21	2965.45	0.000461977	0.00306895	0.731925	-1.36626	201.805	275.719
RILPL2	48.354	0.000462952	0.00307381	0.615888	-1.62367	3.99035	6.47901
LNP1	78.0337	0.000465088	0.00308636	0.690773	-1.44765	5.98281	8.66104
RPUSD4	169.371	0.000466478	0.00309395	0.715839	-1.39696	12.3688	17.2787
LOC90768	79.9032	0.000467664	0.00309906	0.6929	-1.44321	6.17415	8.91059
SLC2A3	83.187	0.00046774	0.00309906	1.59472	1.59472	8.86732	5.56042
NISCH	1179.98	0.000468163	0.00310023	1.40281	1.40281	103.488	73.7721
FRZB	291.16	0.000469918	0.00311021	1.41739	1.41739	42.9946	30.3337
SNAPC4	112.706	0.000470503	0.00311244	0.704191	-1.42007	7.31101	10.3821
TGDS	78.2382	0.000470953	0.00311331	0.684226	-1.46151	6.61905	9.67379
FAM171B	636.474	0.000471128	0.00311331	1.44567	1.44567	53.8456	37.246
POP5	77.7855	0.000475764	0.00314229	0.69572	-1.43736	6.45496	9.2781
ID2	427.683	0.000477973	0.00315522	1.40925	1.40925	41.5355	29.4735
RPGR	55.0087	0.000478351	0.00315606	0.659321	-1.51671	4.57507	6.93907
GART	925.232	0.000479521	0.00316213	0.700529	-1.42749	76.9077	109.785
BTBD10	274.453	0.000480108	0.00316325	1.37723	1.37723	25.109	18.2315
NXT1	142.942	0.000480194	0.00316325	0.708428	-1.41158	12.4317	17.5483
DCAF17	183.001	0.000481447	0.00316984	0.733952	-1.36249	14.0149	19.0951
ATF7IP2	67.3465	0.000482549	0.00317543	0.69307	-1.44286	4.94641	7.13696
TMEM109	159.67	0.000483664	0.00318111	0.677337	-1.47637	14.2723	21.0712
DPH5	388.904	0.000484781	0.00318663	0.711574	-1.40534	26.9049	37.8104
BTN3A1	85.6565	0.000485154	0.00318663	0.657824	-1.52016	6.07452	9.23427
LASP1	286.637	0.000485263	0.00318663	1.4855	1.4855	29.0961	19.5867
MRPS9	177.651	0.000486968	0.00319616	0.693987	-1.44095	14.0351	20.2238
MRPS27	880.537	0.000488918	0.00320696	0.701981	-1.42454	66.3821	94.564
PSTPIP1	85.5611	0.000489123	0.00320696	1.51042	1.51042	6.48441	4.29311
TOMM7	557.772	0.000491229	0.0032176	0.734188	-1.36205	41.7523	56.8687
JAZF1	123.963	0.0004913	0.0032176	1.45661	1.45661	12.9344	8.8798
PLCXD2	59.8351	0.000491514	0.0032176	1.57054	1.57054	4.05802	2.58383
MAP1B	10642.4	0.000492852	0.00322468	1.63314	1.63314	831.675	509.25
LYPD1	219.89	0.000493898	0.00322985	1.48843	1.48843	26.7784	17.991
SSR3	1637.07	0.000497421	0.00325119	0.729887	-1.37007	133.011	182.234
NUDT5	554.738	0.000497865	0.00325192	0.726649	-1.37618	45.6841	62.8695
TCEAL3	86.4008	0.000498048	0.00325192	1.51059	1.51059	9.87562	6.53757
GTPBP6	192.65	0.000499212	0.00325783	0.676345	-1.47853	15.8896	23.4934
TIMM44	256.976	0.000500665	0.00326561	0.678784	-1.47322	20.0678	29.5644
ZNF345	56.4423	0.000503847	0.00328466	1.44555	1.44555	5.11016	3.5351
RAPGEF4	25.5876	0.000505523	0.00329388	0.595011	-1.68064	1.47085	2.47197
RBM19	335.617	0.000506308	0.00329729	0.727264	-1.37502	23.7838	32.7031
RNF112	107.428	0.000506761	0.00329853	1.52138	1.52138	12.0333	7.90948
ADAM19	198.823	0.000507771	0.0033034	1.46265	1.46265	17	11.6228
PLPPR1	189.443	0.00050947	0.00331274	1.41537	1.41537	15.8493	11.198
PLPP3	114.617	0.000510788	0.00331959	0.676495	-1.47821	9.86791	14.5868
C12orf76	87.3848	0.000512433	0.00332752	1.45629	1.45629	8.01807	5.50583
CHCHD6	106.347	0.000512536	0.00332752	0.699062	-1.43049	8.38003	11.9875
SDK2	472.465	0.000514348	0.00333756	1.47261	1.47261	10.9643	7.44552
SNRK	497.272	0.000516512	0.00334988	1.43863	1.43863	55.3466	38.4718
ISOC1	82.1281	0.000518261	0.00335949	0.682443	-1.46532	7.23115	10.596
GPC2	814.599	0.000522384	0.00338447	1.47123	1.47123	59.9448	40.7448
MYADM	99.7958	0.000522872	0.00338589	1.62199	1.62199	11.9905	7.39244
FRY	66.7705	0.000523819	0.00338855	1.51252	1.51252	6.82696	4.51364
NACA	6192.87	0.000523823	0.00338855	0.733398	-1.36352	434.205	592.046
USP20	180.137	0.000524531	0.00339139	1.39471	1.39471	16.0776	11.5276
MRPS12	158.474	0.000525529	0.0033961	0.691595	-1.44593	12.5589	18.1593
BAALC	176.757	0.000526126	0.0033972	1.47282	1.47282	14.6566	9.95139
MRPL58	284.3	0.000526428	0.0033972	0.721976	-1.38509	22.4734	31.1276
PVT1	39.0343	0.000526523	0.0033972	0.635448	-1.57369	2.52017	3.96597
IRF2BP2	2469.12	0.000526916	0.0033972	1.43248	1.43248	208.507	145.557
TNFAIP1	307.588	0.000527153	0.0033972	1.4242	1.4242	29.7287	20.874
RPL37	7086.76	0.000527319	0.0033972	0.721996	-1.38505	447.504	619.815
NOC2L	452.236	0.000527777	0.0033976	0.709956	-1.40854	36.2097	51.0027
ZSWIM6	447.432	0.000527921	0.0033976	1.42943	1.42943	52.4733	36.7092
WIPI1	199.109	0.000529082	0.00340333	1.40893	1.40893	13.1698	9.34734
MRPL1	218.225	0.000531088	0.00341449	0.730767	-1.36842	17.2353	23.5852
MSI2	1124.45	0.000533185	0.00342622	0.748953	-1.3352	86.6525	115.698
MEIOC	51.208	0.000535175	0.00343725	0.644559	-1.55145	4.0493	6.28227
PTPN9	589.603	0.000537387	0.00344969	1.43391	1.43391	62.9757	43.9189
BOP1	895.948	0.000538973	0.00345811	0.670684	-1.49101	67.4392	100.553
YRDC	106.344	0.000539315	0.00345854	0.676569	-1.47805	7.10129	10.496
TRDMT1	72.1508	0.00054003	0.00346137	0.703168	-1.42214	5.18117	7.36832
SASS6	180.697	0.000543578	0.00348228	0.727068	-1.37539	16.7181	22.9939
VWCE	32.9724	0.000543847	0.00348228	0.622313	-1.60691	2.42098	3.89029
RHBDF1	18.403	0.000544247	0.00348307	1.92615	1.92615	2.1386	1.1103
CCDC149	16.5282	0.000544549	0.00348323	1.89774	1.89774	1.82091	0.959515
TIMM13	460.713	0.000545339	0.00348651	0.690352	-1.44854	35.6605	51.6555
QSOX2	299.309	0.000545858	0.0034868	0.705241	-1.41796	23.0594	32.6973
ZFP36L1	18.0073	0.000545939	0.0034868	0.373353	-2.67843	1.31397	3.51937
RHOBTB2	231.93	0.000546742	0.0034893	1.43718	1.43718	24.0326	16.7221
MRPL4	190.53	0.000546902	0.0034893	0.692585	-1.44387	15.5277	22.42
KIAA0895L	254.684	0.000547161	0.0034893	1.40697	1.40697	20.7686	14.7612
ZNF778	172.766	0.000551789	0.00351703	1.44744	1.44744	14.9078	10.2994
EMID1	97.1322	0.000552416	0.00351924	1.48907	1.48907	9.95659	6.68645
ZCRB1	416.622	0.00055363	0.00352519	0.732315	-1.36553	34.2106	46.7156
EIF3J	808.859	0.00055617	0.00353957	0.700623	-1.4273	64.1929	91.6226
CYB5RL	113.542	0.000562085	0.00357529	0.690389	-1.44846	8.60788	12.4682
SLC12A6	231.346	0.000562351	0.00357529	1.39917	1.39917	19.9435	14.2538
NUS1	731.56	0.000563468	0.00358058	0.710498	-1.40746	58.2076	81.9251
NFKBIB	49.4582	0.000564917	0.00358798	0.588993	-1.69781	3.71905	6.31424
PAPPA	24.0364	0.000565274	0.00358843	2.20461	2.20461	1.15885	0.525647
C11orf80	62.1011	0.000566493	0.00359436	1.48801	1.48801	6.7018	4.50385
SYNJ1	152.059	0.000567377	0.00359815	1.43148	1.43148	12.9201	9.02569
ZSWIM3	86.8719	0.000569282	0.00360842	1.51247	1.51247	8.51579	5.63038
CNNM4	139.269	0.000569938	0.00361054	1.42397	1.42397	14.4083	10.1184
ARHGEF17	255.737	0.000570191	0.00361054	1.43254	1.43254	26.4235	18.4452
SCARNA9L	60.8375	0.000572935	0.00362609	0.668501	-1.49588	4.73044	7.07619
GLIPR2	161.926	0.000575408	0.00363991	1.46942	1.46942	18.2868	12.4449
KIFC2	34.2755	0.000577878	0.0036537	1.60279	1.60279	2.92682	1.82608
SDC1	175.451	0.000579024	0.0036591	0.666775	-1.49976	16.6896	25.0303
PRPF3	568.51	0.000579431	0.00365984	0.730176	-1.36953	48.9838	67.0849
PWP1	786.052	0.000581271	0.0036681	0.704529	-1.41939	63.3244	89.8819
AHCTF1P1	17.5437	0.000581322	0.0036681	0.557112	-1.79497	1.158	2.07858
PCDHB3	32.8939	0.000581797	0.00366926	1.69647	1.69647	2.93384	1.72938
SSTR2	5878.84	0.00058243	0.00367141	1.42835	1.42835	454.261	318.033
MMP24	499.369	0.000583672	0.00367637	1.45188	1.45188	56.9966	39.257
CBWD3	23.5752	0.000583801	0.00367637	0.580676	-1.72213	1.75321	3.01926
[truncated: 10,584 more rows]

## Sheet: siMYCN_72h_IMR32_1.5fold_q<0.05
Gene ID	Total counts	P-value (MYCN_siRNA2 vs. Con_siRNA)	FDR step up (MYCN_siRNA2 vs. Con_siRNA)	Ratio (MYCN_siRNA2 vs. Con_siRNA)	Fold change (MYCN_siRNA2 vs. Con_siRNA)	LSMean(MYCN_siRNA2) (MYCN_siRNA2 vs. Con_siRNA)	LSMean(Con_siRNA) (MYCN_siRNA2 vs. Con_siRNA)
STMN2	813	2.64e-19	3.32e-15	20.3	20.29	81.1	4
STMN4	200	5.8e-18	3.65e-14	10.9	10.94	14.2	1.3
RGS4	91.5	1.56e-16	6.55e-13	9.13	9.13	13.8	1.51
ALK	698	6.45e-16	2.03e-12	4.27	4.27	163	38.1
PLCL1	165	2.21e-15	5.57e-12	4.42	4.42	23.2	5.24
SLC38A5	236	4.64e-15	9.74e-12	0.22	-4.56	9.28	42.3
SCN9A	166	9.11e-15	1.64e-11	4.69	4.69	10.2	2.17
TTC9B	35.6	1.97e-14	3.1e-11	8.03	8.03	3.34	0.416
OPTN	182	4.01e-14	5.33e-11	4.37	4.37	19.1	4.36
CNR1	314	4.23e-14	5.33e-11	3.5	3.5	25.3	7.22
ADAMTSL1	183	5.46e-14	6.25e-11	3.24	3.24	25.1	7.76
P2RX3	146	9.6e-14	1.01e-10	4.08	4.08	11.2	2.76
SYNGR3	57.6	1.2e-13	1.14e-10	6.03	6.03	5.31	0.881
TGFB2	140	1.32e-13	1.14e-10	3.54	3.54	25.6	7.23
GAP43	829	1.36e-13	1.14e-10	3.8	3.8	27.5	7.25
NRP1	230	3.44e-13	2.71e-10	5.04	5.04	49.7	9.87
TNC	323	4.46e-13	3.3e-10	4.1	4.1	27.8	6.79
ELFN1	87.7	5.13e-13	3.59e-10	4.14	4.14	10.2	2.46
CALB1	100	6e-13	3.97e-10	4.95	4.95	20.3	4.11
SLC7A2	226	6.75e-13	4.25e-10	0.323	-3.1	12.4	38.6
PLEKHA6	772	9.32e-13	5.59e-10	3.14	3.14	87.6	27.9
C11orf96	236	1.16e-12	6.64e-10	3.61	3.61	24.7	6.85
ADGRG1	339	1.62e-12	8.81e-10	3.47	3.47	17.5	5.05
RPRM	210	1.68e-12	8.81e-10	3.61	3.61	6.93	1.92
PCDH17	162	2.32e-12	1.17e-09	2.85	2.85	16.1	5.66
SH2D3C	89	2.7e-12	1.3e-09	4.66	4.66	7.44	1.6
RAB29	112	3.89e-12	1.81e-09	0.347	-2.89	5.81	16.8
SCUBE1	75.3	4.28e-12	1.87e-09	4.29	4.29	13.5	3.15
DUSP8	58.2	4.3e-12	1.87e-09	6.61	6.61	3.84	0.581
SYT11	2440	4.77e-12	2e-09	3.61	3.61	245	67.8
SLC24A3	43.8	5.1e-12	2.07e-09	4.81	4.81	3.96	0.824
LURAP1L	35.6	5.29e-12	2.08e-09	9.2	9.2	1.94	0.211
DDN	136	5.62e-12	2.14e-09	0.337	-2.96	5.15	15.3
FAIM2	261	9e-12	3.33e-09	3.52	3.52	25.6	7.27
SNAP23	51.4	1.13e-11	4.05e-09	0.303	-3.3	2.65	8.76
FBN2	114	1.25e-11	4.35e-09	0.34	-2.94	7.14	21
PDE7B	20.6	1.28e-11	4.35e-09	13.8	13.78	2.42	0.175
ZNF536	359	1.44e-11	4.77e-09	2.75	2.75	22.9	8.31
TAF4B	165	1.61e-11	5.09e-09	0.393	-2.54	9.32	23.7
PPP2R5B	146	1.62e-11	5.09e-09	3.47	3.47	12.3	3.54
DCC	143	1.69e-11	5.19e-09	3.86	3.86	19.4	5.03
TTBK1	147	1.94e-11	5.68e-09	3.14	3.14	12.1	3.87
SEMA6C	193	1.94e-11	5.68e-09	2.66	2.66	15.5	5.82
SLC6A2	268	2.5e-11	7.09e-09	2.95	2.95	50.3	17.1
CHL1	104	2.54e-11	7.09e-09	3.45	3.45	13.6	3.93
HID1	24.5	2.73e-11	7.48e-09	7.56	7.56	1.62	0.214
SGIP1	66.2	3.52e-11	9.42e-09	3.16	3.16	6.22	1.97
STRA6	174	3.61e-11	9.47e-09	3.12	3.12	35.6	11.4
ZCCHC12	43.7	3.71e-11	9.54e-09	4.57	4.57	3.64	0.796
SCN3A	512	3.9e-11	9.69e-09	2.37	2.37	39.8	16.8
TP53INP1	841	3.97e-11	9.69e-09	2.59	2.59	92.5	35.7
DACT3	111	4.01e-11	9.69e-09	3.22	3.22	11.8	3.65
GPR137C	77.2	4.08e-11	9.69e-09	2.72	2.72	7.29	2.68
SCG2	1560	4.36e-11	1.01e-08	3.09	3.09	132	42.9
KIF1C	112	4.42e-11	1.01e-08	0.376	-2.66	7.53	20
L1CAM	1770	4.58e-11	1.03e-08	2.98	2.98	191	64.1
RYR2	396	5.72e-11	1.25e-08	2.37	2.37	38.9	16.4
CADPS	89.6	5.78e-11	1.25e-08	2.89	2.89	7.09	2.46
KIF5A	342	5.88e-11	1.25e-08	2.56	2.56	23	8.99
SMIM14	289	7.59e-11	1.58e-08	2.4	2.4	28.4	11.8
JUP	216	7.69e-11	1.58e-08	2.76	2.76	19.2	6.97
SCN5A	263	7.8e-11	1.58e-08	2.43	2.43	44.8	18.5
CD9	201	8.06e-11	1.6e-08	2.68	2.68	37.2	13.9
TCP11L2	65.2	8.16e-11	1.6e-08	3.27	3.27	5.51	1.69
JAG1	102	8.55e-11	1.65e-08	3.44	3.44	9.96	2.89
VCAN	628	8.82e-11	1.68e-08	0.346	-2.89	32.8	94.8
NRXN1	525	9.21e-11	1.72e-08	2.2	2.2	47.6	21.6
JUN	661	9.34e-11	1.72e-08	3.11	3.11	58.3	18.7
DCX	2370	9.43e-11	1.72e-08	3.07	3.07	203	66
TUBA1A	23300	9.67e-11	1.74e-08	2.77	2.77	2330	844
MAPK10	536	1.13e-10	1.98e-08	2.52	2.52	38.4	15.2
SAMD4A	63.4	1.13e-10	1.98e-08	2.98	2.98	8.02	2.69
CDH6	94	1.23e-10	2.11e-08	2.53	2.53	14.8	5.84
PPARGC1B	26.6	1.29e-10	2.19e-08	0.233	-4.29	1.08	4.64
NOP16	135	1.31e-10	2.2e-08	0.424	-2.36	7.88	18.6
TMEM151B	287	1.38e-10	2.28e-08	2.55	2.55	32.7	12.8
DPP6	166	1.46e-10	2.38e-08	2.48	2.48	21.8	8.78
CELF3	504	1.48e-10	2.38e-08	2.5	2.5	44.4	17.8
TGFA	259	1.52e-10	2.42e-08	2.49	2.49	13	5.23
PCDHA8	208	1.57e-10	2.46e-08	3.01	3.01	23.2	7.71
FGFRL1	93.5	1.76e-10	2.72e-08	0.35	-2.86	4.79	13.7
CNKSR3	213	1.8e-10	2.72e-08	2.26	2.26	39.8	17.6
DENND2A	235	1.82e-10	2.72e-08	2.38	2.38	24.7	10.4
RTN1	1150	1.82e-10	2.72e-08	2.44	2.44	105	43.1
MGP	315	1.86e-10	2.75e-08	2.37	2.37	29.2	12.3
CNGB1	34.3	1.88e-10	2.75e-08	3.84	3.84	4.07	1.06
SHC2	188	2.05e-10	2.96e-08	2.53	2.53	14.9	5.9
MVP	348	2.24e-10	3.2e-08	2.95	2.95	39	13.2
ENPP2	312	2.5e-10	3.53e-08	2.88	2.88	52	18.1
SYT2	58.2	2.55e-10	3.57e-08	0.304	-3.29	2.89	9.52
ELN	42.3	2.69e-10	3.72e-08	5.42	5.42	9.06	1.67
SLC39A8	74	2.79e-10	3.82e-08	0.329	-3.04	4.08	12.4
KCNH7	163	2.94e-10	3.97e-08	2.17	2.17	21.2	9.75
CTNNA2	473	3.73e-10	5e-08	2.34	2.34	48.6	20.7
TMEM169	438	3.92e-10	5.19e-08	2.4	2.4	53.5	22.3
PDZD7	34.9	4.04e-10	5.3e-08	3.48	3.48	2.75	0.791
TXNIP	1250	4.14e-10	5.37e-08	2.37	2.37	121	50.9
SYT17	165	4.27e-10	5.49e-08	2.8	2.8	17.6	6.27
RUFY3	1000	4.33e-10	5.5e-08	2.31	2.31	86.4	37.4
DNAAF5	290	4.49e-10	5.63e-08	0.431	-2.32	18.7	43.3
GAB2	205	4.52e-10	5.63e-08	2.5	2.5	32.9	13.2
DGKI	281	4.56e-10	5.63e-08	2.38	2.38	20.1	8.44
ARSF	36.3	4.75e-10	5.8e-08	7.54	7.54	1.61	0.213
PLXNA2	721	4.81e-10	5.82e-08	2.44	2.44	67.5	27.7
POLR3G	29.9	5.01e-10	6e-08	0.285	-3.51	1.3	4.56
PYGL	33.5	5.26e-10	6.24e-08	0.197	-5.08	1.26	6.4
CNTN1	774	5.66e-10	6.66e-08	2.83	2.83	143	50.6
SLC29A2	61.4	6.6e-10	7.69e-08	0.357	-2.8	3.82	10.7
MAP6	502	6.9e-10	7.97e-08	2.08	2.08	35.7	17.1
HSPE1	1210	7.22e-10	8.22e-08	0.477	-2.1	80.2	168
INSRR	202	7.26e-10	8.22e-08	2.27	2.27	25.4	11.2
GATS	144	8.06e-10	9.01e-08	2.2	2.2	12.1	5.47
CLU	267	8.09e-10	9.01e-08	3.6	3.6	27.9	7.75
ZNF608	524	8.22e-10	9.02e-08	2.08	2.08	48.7	23.5
RPS6KL1	281	8.24e-10	9.02e-08	2.24	2.24	20.7	9.24
CELF4	104	8.57e-10	9.29e-08	2.42	2.42	5.93	2.46
ATP8A2	178	8.88e-10	9.55e-08	2.41	2.41	12.3	5.09
AHNAK	1640	8.97e-10	9.56e-08	3.35	3.35	375	112
UTP20	937	9.21e-10	9.74e-08	0.455	-2.2	62.5	138
TM7SF2	96.7	9.41e-10	9.87e-08	2.46	2.46	9.84	4.01
AHNAK2	225	9.78e-10	1.02e-07	2.46	2.46	17.5	7.13
SVOP	236	1e-09	1.03e-07	2.7	2.7	25.4	9.42
COL4A1	287	1.08e-09	1.11e-07	0.463	-2.16	20.4	44.1
GCH1	339	1.15e-09	1.17e-07	2.36	2.36	43.4	18.4
AMER2	111	1.22e-09	1.23e-07	2.2	2.2	11.1	5.07
CD200	69.3	1.24e-09	1.24e-07	2.54	2.54	5.16	2.03
PARM1	347	1.26e-09	1.25e-07	2.3	2.3	59.8	26
VSTM2A	351	1.29e-09	1.27e-07	2.22	2.22	51	22.9
LOC101927267	74.1	1.35e-09	1.32e-07	2.43	2.43	6.5	2.68
CCSER1	104	1.41e-09	1.37e-07	2.16	2.16	9.13	4.23
SRCIN1	82.6	1.51e-09	1.45e-07	2.41	2.41	6.03	2.51
SNAP91	234	1.55e-09	1.48e-07	2.25	2.25	22.5	10
BDKRB2	43.8	1.59e-09	1.48e-07	3.98	3.98	5.5	1.38
SLCO4A1	74.9	1.59e-09	1.48e-07	0.374	-2.67	3.49	9.33
ANK2	3420	1.6e-09	1.48e-07	2.25	2.25	269	120
TBC1D4	141	1.6e-09	1.48e-07	0.427	-2.34	8.57	20.1
KALRN	751	1.77e-09	1.63e-07	2.05	2.05	48.9	23.8
RRP12	370	1.86e-09	1.7e-07	0.474	-2.11	22.4	47.4
NACAD	241	1.88e-09	1.7e-07	2.72	2.72	21.2	7.8
ARVCF	221	1.98e-09	1.77e-07	2.16	2.16	22.8	10.6
SIX5	33.8	1.99e-09	1.77e-07	0.278	-3.59	1.58	5.69
CADM1	475	2.07e-09	1.83e-07	2.4	2.4	57.8	24.1
FAM131B	242	2.19e-09	1.93e-07	2.31	2.31	20.4	8.84
RHOC	462	2.31e-09	2.01e-07	2.45	2.45	55.6	22.7
SDC2	210	2.34e-09	2.01e-07	2.22	2.22	39.6	17.8
SORBS2	82.2	2.34e-09	2.01e-07	2.48	2.48	4.63	1.87
CEMIP	34.7	2.36e-09	2.01e-07	4.04	4.04	7.01	1.74
AK4	238	2.36e-09	2.01e-07	0.435	-2.3	17.8	40.9
NPM1	13600	2.41e-09	2.04e-07	0.491	-2.04	861	1750
MCF2L	375	2.45e-09	2.04e-07	2.09	2.09	29.7	14.3
COL5A1	956	2.45e-09	2.04e-07	2.1	2.1	85.5	40.7
RCN1	420	2.47e-09	2.04e-07	0.431	-2.32	24.5	56.8
IPO4	420	2.57e-09	2.12e-07	0.456	-2.19	25.4	55.7
CCNG2	329	2.62e-09	2.14e-07	2.07	2.07	29.5	14.2
RET	29.7	2.74e-09	2.23e-07	3.7	3.7	5.92	1.6
UNC5C	323	2.95e-09	2.37e-07	2.1	2.1	50.5	24.1
PLD6	216	2.96e-09	2.37e-07	0.437	-2.29	12.7	28.9
LRRC55	404	3.11e-09	2.47e-07	2.19	2.19	21.6	9.84
HECW1	34.2	3.19e-09	2.53e-07	3.05	3.05	2.41	0.79
LAMA1	63.7	3.37e-09	2.65e-07	0.353	-2.84	3.81	10.8
PIEZO1	149	3.43e-09	2.68e-07	0.424	-2.36	9.76	23
CLVS1	175	3.58e-09	2.78e-07	2.15	2.15	16.3	7.57
PRDM1	27.6	3.78e-09	2.92e-07	0.243	-4.12	0.511	2.1
PRPH	1380	3.89e-09	2.98e-07	2.56	2.56	145	56.6
GNG2	393	3.97e-09	3.03e-07	2.17	2.17	42.7	19.7
WWC2	85	3.99e-09	3.03e-07	0.459	-2.18	5.63	12.3
BTBD11	979	4.05e-09	3.05e-07	2.38	2.38	72.3	30.3
NYAP1	91.8	4.14e-09	3.09e-07	2.63	2.63	6.7	2.55
EPPK1	30.7	4.15e-09	3.09e-07	4.43	4.43	1.3	0.293
B3GNT8	16.9	4.2e-09	3.11e-07	3.75	3.75	2.02	0.541
FAM84B	67.6	4.29e-09	3.15e-07	0.38	-2.63	2.96	7.78
CCDC86	141	4.32e-09	3.16e-07	0.466	-2.14	9.55	20.5
LRIG3	59.1	4.53e-09	3.29e-07	0.321	-3.12	3.79	11.8
PTPRN2	199	4.59e-09	3.32e-07	2.19	2.19	21.3	9.74
PMEL	349	4.61e-09	3.32e-07	2.52	2.52	31.4	12.5
RRP9	297	4.69e-09	3.35e-07	0.452	-2.21	18.8	41.5
PIK3IP1	70.2	4.79e-09	3.4e-07	2.51	2.51	5.7	2.27
MDFI	123	4.85e-09	3.43e-07	0.428	-2.34	7.83	18.3
RIN2	70.1	4.89e-09	3.44e-07	2.41	2.41	6.4	2.66
TIMP3	1090	4.94e-09	3.45e-07	2.41	2.41	150	62.4
SCARB1	274	5.27e-09	3.66e-07	0.461	-2.17	17.9	38.7
MCHR1	36.8	5.52e-09	3.82e-07	4.21	4.21	5.78	1.37
TNFRSF19	30.8	5.8e-09	3.99e-07	3.3	3.3	3.9	1.18
RPL22L1	867	6.09e-09	4.17e-07	0.453	-2.21	55.7	123
SYNPO	66.4	6.17e-09	4.2e-07	2.67	2.67	7.92	2.96
EYS	442	6.4e-09	4.33e-07	2.13	2.13	33.2	15.6
PDZD2	55.1	6.43e-09	4.33e-07	3	3	9.42	3.14
AKR1C1	21.4	6.64e-09	4.45e-07	4.94	4.94	1.24	0.251
FRMD3	129	6.71e-09	4.47e-07	2.22	2.22	5.3	2.39
ATCAY	1240	6.91e-09	4.57e-07	2.26	2.26	120	53.1
GARNL3	171	7.04e-09	4.64e-07	2.13	2.13	18.9	8.89
NPM3	219	7.11e-09	4.65e-07	0.516	-1.94	15.2	29.3
CHRDL1	84.3	7.14e-09	4.65e-07	0.42	-2.38	4.75	11.3
AMOTL2	357	7.25e-09	4.7e-07	2.19	2.19	29.7	13.6
MAPKAPK3	147	7.31e-09	4.71e-07	0.433	-2.31	9.23	21.3
DTNA	77.6	7.42e-09	4.76e-07	2.69	2.69	8.25	3.06
ICA1	103	7.6e-09	4.84e-07	2.29	2.29	17	7.45
DDAH2	605	7.61e-09	4.84e-07	2.19	2.19	69.6	31.7
ZMAT4	100	7.8e-09	4.93e-07	2.26	2.26	7.41	3.28
PAICS	1840	8.02e-09	5.02e-07	0.488	-2.05	128	263
ID4	73.5	8.03e-09	5.02e-07	2.61	2.61	3.9	1.5
FAM214B	50.4	8.07e-09	5.03e-07	2.55	2.55	4.69	1.84
FGFR4	33.9	8.21e-09	5.07e-07	0.36	-2.78	1.72	4.77
SEMA3C	36	8.21e-09	5.07e-07	4.39	4.39	0.766	0.174
ABCA7	50.3	8.57e-09	5.26e-07	2.47	2.47	5.77	2.33
PXDNL	45.6	8.62e-09	5.27e-07	2.62	2.62	8.34	3.18
RAB6B	503	9e-09	5.47e-07	2.14	2.14	35.4	16.5
CREB5	96.1	9.29e-09	5.62e-07	3.21	3.21	4.3	1.34
NEK6	64.1	9.4e-09	5.66e-07	0.411	-2.43	3.54	8.62
TRIM36	218	9.57e-09	5.73e-07	2.04	2.04	22.5	11.1
CD3EAP	64	9.62e-09	5.74e-07	0.403	-2.48	3.75	9.3
LRRC24	29.1	9.94e-09	5.9e-07	3.82	3.82	3.42	0.894
KCNJ8	135	1e-08	5.9e-07	0.485	-2.06	10.9	22.5
ATP1B1	1810	1.02e-08	6e-07	2.05	2.05	274	134
HMCN2	114	1.06e-08	6.18e-07	2.17	2.17	12	5.54
MYT1	566	1.08e-08	6.27e-07	2.06	2.06	36.8	17.9
SOX4	2680	1.1e-08	6.38e-07	2.22	2.22	249	112
NTRK3	78.7	1.19e-08	6.88e-07	2.23	2.23	3.52	1.58
NOP14	473	1.22e-08	6.98e-07	0.485	-2.06	29.7	61.2
DDX31	204	1.23e-08	7.05e-07	0.499	-2	13.5	27.1
PEG13	21.7	1.25e-08	7.11e-07	5.02	5.02	1.6	0.318
CLIP2	312	1.35e-08	7.67e-07	2.18	2.18	27.6	12.6
PUS1	109	1.37e-08	7.71e-07	0.456	-2.19	7.13	15.6
GNL3	922	1.41e-08	7.92e-07	0.485	-2.06	58.2	120
RAB3B	514	1.51e-08	8.43e-07	2.32	2.32	48.6	20.9
REST	122	1.66e-08	9.27e-07	0.42	-2.38	9.47	22.6
MTHFD1L	356	1.68e-08	9.31e-07	0.534	-1.87	25.7	48.1
PCBP3	161	1.7e-08	9.37e-07	2.07	2.07	19.5	9.39
SLC25A37	137	1.75e-08	9.61e-07	0.541	-1.85	9.34	17.3
FAM219A	229	1.77e-08	9.7e-07	2.09	2.09	24.2	11.6
GTF2IRD2	196	1.79e-08	9.71e-07	1.97	1.97	21.1	10.7
CLUH	408	1.8e-08	9.71e-07	0.507	-1.97	26.7	52.7
SEZ6L	2430	1.8e-08	9.71e-07	2.28	2.28	251	110
MYT1L	266	1.91e-08	1.03e-06	1.9	1.9	21.3	11.2
PRTG	138	1.93e-08	1.03e-06	0.465	-2.15	7.35	15.8
IFRD2	219	1.93e-08	1.03e-06	0.499	-2	16.6	33.2
APC2	546	2.02e-08	1.07e-06	1.97	1.97	44.7	22.7
STK26	60	2.05e-08	1.08e-06	0.432	-2.32	3.93	9.11
TSHZ2	47	2.07e-08	1.09e-06	2.61	2.61	3.98	1.53
AKAP6	290	2.08e-08	1.09e-06	2.04	2.04	17.2	8.43
DAAM2	60.1	2.15e-08	1.12e-06	0.429	-2.33	4.44	10.3
TGFB1I1	101	2.22e-08	1.15e-06	2.33	2.33	11.4	4.9
MYL6	3160	2.23e-08	1.15e-06	2.05	2.05	361	176
AEN	591	2.25e-08	1.16e-06	0.496	-2.02	41.5	83.6
AMER3	889	2.3e-08	1.18e-06	2.07	2.07	131	63.5
CACNG4	392	2.38e-08	1.21e-06	2.22	2.22	39.7	17.9
CNTN2	4560	2.38e-08	1.21e-06	2.11	2.11	204	96.7
RFTN1	123	2.39e-08	1.21e-06	2.36	2.36	21.6	9.15
AJUBA	35.3	2.41e-08	1.22e-06	0.359	-2.78	1.87	5.21
ZNF436	294	2.44e-08	1.23e-06	2.09	2.09	29.9	14.3
C1QBP	1420	2.46e-08	1.23e-06	0.542	-1.84	97.5	180
PCDHAC1	127	2.47e-08	1.24e-06	2.24	2.24	15.3	6.82
MYBBP1A	475	2.63e-08	1.31e-06	0.504	-1.98	30.7	60.9
RPL12	7040	2.69e-08	1.33e-06	0.538	-1.86	392	728
TENM1	69	2.76e-08	1.36e-06	2.23	2.23	3.84	1.72
RRS1	141	2.78e-08	1.37e-06	0.451	-2.22	9.28	20.6
PNP	344	2.95e-08	1.44e-06	0.506	-1.97	24.8	49.1
RIDA	112	2.98e-08	1.45e-06	0.524	-1.91	7.94	15.2
ARL4D	773	3.17e-08	1.54e-06	2.09	2.09	87	41.6
RPS18	11400	3.24e-08	1.57e-06	0.515	-1.94	633	1230
2023-03-02	50.6	3.34e-08	1.61e-06	2.43	2.43	5.24	2.16
SERINC2	119	3.37e-08	1.61e-06	2.31	2.31	14.1	6.09
PTPN13	359	3.37e-08	1.61e-06	0.527	-1.9	25.4	48.1
SMAD3	67.1	3.39e-08	1.61e-06	0.363	-2.75	4.62	12.7
ADAMTS20	65.6	3.66e-08	1.74e-06	0.467	-2.14	3.99	8.53
ISLR2	404	3.69e-08	1.74e-06	2.53	2.53	62.1	24.6
CEND1	70.1	3.7e-08	1.74e-06	2.22	2.22	5.26	2.37
TIMP2	3390	4.04e-08	1.89e-06	2.46	2.46	359	146
CNTN5	34.8	4.13e-08	1.92e-06	2.66	2.66	5.64	2.12
LOC283731	187	4.13e-08	1.92e-06	2.22	2.22	26	11.7
LZTS3	80.8	4.18e-08	1.94e-06	2.48	2.48	7.9	3.19
ATAD3B	75.2	4.23e-08	1.94e-06	0.498	-2.01	4.61	9.27
PTGFR	82	4.23e-08	1.94e-06	2.92	2.92	19.1	6.53
KCND2	35.4	4.24e-08	1.94e-06	2.89	2.89	3.29	1.14
PRDX4	652	4.44e-08	2.03e-06	0.539	-1.86	48.7	90.3
HPDL	43.8	4.57e-08	2.08e-06	0.336	-2.98	2.72	8.1
ASTN2	663	4.62e-08	2.1e-06	1.92	1.92	58.7	30.6
ATP6V1G2	67.3	4.64e-08	2.1e-06	2.47	2.47	7.38	2.99
WFIKKN2	823	4.65e-08	2.1e-06	2.44	2.44	96.5	39.5
ECE2	64.6	4.67e-08	2.1e-06	0.416	-2.4	3.83	9.2
DPH2	143	4.96e-08	2.22e-06	0.531	-1.88	9.48	17.9
MAOA	361	5.03e-08	2.25e-06	2.36	2.36	60.2	25.5
TUBB2A	1270	5.08e-08	2.26e-06	2.1	2.1	135	63.9
FRMD6	692	5.14e-08	2.27e-06	1.97	1.97	89.3	45.3
LOC728392	162	5.15e-08	2.27e-06	2.01	2.01	16.7	8.31
NOC3L	388	5.19e-08	2.28e-06	0.522	-1.91	27.3	52.3
S1PR1	25.8	5.22e-08	2.29e-06	3.11	3.11	2.56	0.822
SNHG5	325	5.26e-08	2.29e-06	0.54	-1.85	17.5	32.3
MAPT	268	5.27e-08	2.29e-06	2.02	2.02	15.7	7.78
DSCAM	19.5	5.28e-08	2.29e-06	3.96	3.96	4.21	1.06
SFXN3	241	5.33e-08	2.3e-06	2.19	2.19	24.8	11.3
CA12	169	5.7e-08	2.46e-06	0.481	-2.08	10.3	21.4
ADAMTS1	38.1	5.73e-08	2.46e-06	0.339	-2.95	2.37	6.98
PHACTR3	29.1	5.95e-08	2.55e-06	4.85	4.85	1.26	0.26
GNPNAT1	207	5.97e-08	2.55e-06	0.551	-1.82	15.7	28.5
SLC4A8	1050	6.09e-08	2.59e-06	2.09	2.09	135	64.8
CLSTN2	192	6.13e-08	2.6e-06	2.15	2.15	12.2	5.67
LRRN3	47.2	6.16e-08	2.6e-06	3.46	3.46	11	3.19
KLHDC8B	98.2	6.25e-08	2.63e-06	2.1	2.1	11.2	5.34
TMEM35A	174	6.3e-08	2.64e-06	2.11	2.11	18	8.52
LDHA	4120	6.31e-08	2.64e-06	0.518	-1.93	320	618
ABCC8	77.7	6.35e-08	2.65e-06	2.17	2.17	8.69	4.01
PTCHD4	30.8	6.45e-08	2.68e-06	0.34	-2.94	1.84	5.4
NLE1	180	6.51e-08	2.69e-06	0.549	-1.82	11.9	21.7
DHX37	331	6.52e-08	2.69e-06	0.498	-2.01	22.4	44.9
PIK3R1	241	6.56e-08	2.69e-06	2.17	2.17	23.3	10.7
THSD7A	53.4	6.57e-08	2.69e-06	2.34	2.34	9.07	3.88
ZFYVE1	185	6.66e-08	2.72e-06	2.1	2.1	17.1	8.14
MAPK8IP1	709	6.86e-08	2.79e-06	2.17	2.17	59.8	27.5
PKIA	930	6.87e-08	2.79e-06	1.77	1.77	89.6	50.6
PSMG1	186	7.16e-08	2.9e-06	0.538	-1.86	14.4	26.7
PCSK1N	218	7.52e-08	3.03e-06	2.23	2.23	26.4	11.8
GABBR1	79.2	7.7e-08	3.09e-06	2.05	2.05	6.24	3.04
TOP1MT	93.6	7.71e-08	3.09e-06	0.519	-1.93	6.44	12.4
SNHG3	170	7.75e-08	3.1e-06	0.524	-1.91	11.1	21.2
DOC2B	58.9	7.96e-08	3.17e-06	2.21	2.21	9.04	4.09
LOX	121	8.14e-08	3.23e-06	0.475	-2.11	5.34	11.2
FNDC5	666	8.22e-08	3.25e-06	1.82	1.82	58.7	32.2
CRIP2	163	8.27e-08	3.26e-06	2.22	2.22	14.5	6.53
GLDC	192	8.48e-08	3.34e-06	0.476	-2.1	9.68	20.3
MAPK11	111	8.66e-08	3.39e-06	1.91	1.91	10.9	5.72
PPAN	207	8.69e-08	3.39e-06	0.56	-1.79	14.3	25.5
EBF4	34.8	8.8e-08	3.43e-06	2.7	2.7	4.75	1.76
DUSP10	122	8.92e-08	3.47e-06	2.34	2.34	11.5	4.91
ST8SIA1	66.9	8.98e-08	3.48e-06	2.28	2.28	4.7	2.06
GTF2IRD2B	97.6	9.12e-08	3.52e-06	1.97	1.97	10.4	5.26
DPYSL3	2120	9.44e-08	3.63e-06	2.1	2.1	167	79.6
BMF	145	9.61e-08	3.69e-06	1.98	1.98	13.2	6.67
ALCAM	773	9.72e-08	3.72e-06	1.78	1.78	42.8	24.1
INHBE	26.7	1e-07	3.81e-06	0.341	-2.93	1.11	3.26
CELF5	103	1.01e-07	3.85e-06	2.15	2.15	7.05	3.28
YPEL5	419	1.04e-07	3.93e-06	1.76	1.76	35.5	20.1
PARP6	847	1.04e-07	3.94e-06	1.86	1.86	83.6	45
SULT4A1	83.7	1.06e-07	4e-06	2.03	2.03	7.94	3.91
DLEU1	73.9	1.07e-07	4e-06	0.491	-2.04	4.97	10.1
B3GALT2	336	1.07e-07	4e-06	1.79	1.79	23.3	13
SELENOW	401	1.11e-07	4.13e-06	1.75	1.75	37.5	21.4
PREX2	32.9	1.13e-07	4.19e-06	0.359	-2.79	1.74	4.85
KLHL24	1600	1.13e-07	4.19e-06	1.81	1.81	116	64.4
PUM3	352	1.16e-07	4.28e-06	0.562	-1.78	25.1	44.7
TRIM2	836	1.16e-07	4.29e-06	1.87	1.87	74.8	40
PSMG3-AS1	80.6	1.22e-07	4.5e-06	2.18	2.18	8.04	3.7
ARFGEF3	19.7	1.25e-07	4.58e-06	3.17	3.17	1.22	0.385
PGPEP1	70.8	1.26e-07	4.6e-06	2.13	2.13	5.33	2.51
HSPD1	7380	1.28e-07	4.64e-06	0.529	-1.89	520	983
EPHA8	39.4	1.28e-07	4.64e-06	0.37	-2.7	0.446	1.21
MMP15	180	1.29e-07	4.64e-06	2.17	2.17	20.6	9.5
TRIM46	96.6	1.29e-07	4.64e-06	1.93	1.93	8.19	4.25
MAFB	41.7	1.29e-07	4.64e-06	2.58	2.58	5.46	2.11
PPIF	557	1.29e-07	4.64e-06	0.525	-1.91	38.3	73.1
TSPAN7	333	1.31e-07	4.68e-06	2.45	2.45	36.3	14.8
DKC1	823	1.36e-07	4.85e-06	0.526	-1.9	57.6	110
GPATCH4	309	1.39e-07	4.94e-06	0.527	-1.9	21.5	40.8
MTAP	196	1.39e-07	4.94e-06	0.457	-2.19	15.4	33.8
SLC43A2	191	1.39e-07	4.94e-06	2.1	2.1	17.5	8.31
PNO1	417	1.4e-07	4.96e-06	0.571	-1.75	29.5	51.6
LRP4	165	1.43e-07	5.03e-06	0.502	-1.99	11.1	22.1
C10orf10	15.9	1.44e-07	5.05e-06	3.43	3.43	1.34	0.39
RBMS3	1870	1.47e-07	5.14e-06	1.84	1.84	214	116
APRT	253	1.53e-07	5.34e-06	0.56	-1.79	16.2	28.9
SDCCAG3	218	1.54e-07	5.34e-06	0.546	-1.83	14.6	26.6
PPEF1	116	1.54e-07	5.34e-06	0.489	-2.05	6.3	12.9
MYO19	168	1.55e-07	5.38e-06	0.569	-1.76	12.9	22.6
PCOLCE2	73.1	1.58e-07	5.46e-06	0.455	-2.2	4.84	10.6
EBF3	1980	1.58e-07	5.46e-06	1.78	1.78	187	105
KCNK9	33.5	1.59e-07	5.48e-06	2.7	2.7	1.93	0.714
TANC1	151	1.61e-07	5.53e-06	0.489	-2.05	10.8	22.2
TWNK	323	1.62e-07	5.53e-06	0.539	-1.85	20.9	38.8
DUXAP10	140	1.63e-07	5.55e-06	0.544	-1.84	8.62	15.8
MDGA1	104	1.66e-07	5.63e-06	1.93	1.93	9.48	4.91
METTL1	69.6	1.71e-07	5.81e-06	0.498	-2.01	4.83	9.7
TPPP3	34.8	1.8e-07	6.08e-06	2.71	2.71	2.53	0.933
APLP1	609	1.81e-07	6.1e-06	2.03	2.03	67.1	33
HRK	52.9	1.83e-07	6.15e-06	2.67	2.67	5.31	1.99
CNNM1	103	1.84e-07	6.16e-06	0.449	-2.23	6.36	14.2
SNPH	59.3	1.85e-07	6.19e-06	2.11	2.11	7.08	3.36
FGF14	77.8	1.87e-07	6.25e-06	2.15	2.15	9.38	4.36
NOP2	384	1.89e-07	6.28e-06	0.57	-1.75	27.3	47.9
MRTO4	221	1.92e-07	6.36e-06	0.55	-1.82	16	29.1
XRCC2	140	1.92e-07	6.37e-06	0.537	-1.86	11.4	21.3
NOLC1	1770	1.94e-07	6.39e-06	0.54	-1.85	121	225
MAGED4	341	1.94e-07	6.4e-06	1.97	1.97	37.2	18.9
MAGED4B	348	1.98e-07	6.49e-06	1.97	1.97	38	19.3
NME1	3810	1.99e-07	6.51e-06	0.569	-1.76	275	484
PCDHB9	65.9	2.01e-07	6.57e-06	1.94	1.94	5.53	2.85
RTN2	351	2.05e-07	6.67e-06	1.93	1.93	35.7	18.5
NCAN	664	2.1e-07	6.84e-06	1.94	1.94	63.5	32.8
ABCC4	426	2.18e-07	7.07e-06	0.519	-1.93	26.1	50.2
SLC10A4	116	2.22e-07	7.19e-06	2.18	2.18	16	7.33
NAT10	482	2.23e-07	7.19e-06	0.548	-1.83	33.2	60.7
URB2	693	2.23e-07	7.19e-06	0.548	-1.83	50.1	91.5
PLXND1	242	2.24e-07	7.2e-06	0.461	-2.17	15.3	33.2
E2F7	184	2.27e-07	7.26e-06	0.508	-1.97	14.7	29
TAGLN3	1090	2.27e-07	7.26e-06	1.87	1.87	70.6	37.8
GSG1L	49.8	2.28e-07	7.26e-06	2.19	2.19	8.83	4.04
LYAR	143	2.29e-07	7.27e-06	0.514	-1.95	10.3	20.1
CELF6	57.9	2.3e-07	7.29e-06	2.16	2.16	6.13	2.84
NUDT10	58.6	2.33e-07	7.35e-06	0.468	-2.14	3.15	6.73
PTPRO	566	2.36e-07	7.44e-06	1.73	1.73	44.5	25.8
GLRX	134	2.37e-07	7.44e-06	1.78	1.78	12.1	6.79
GCHFR	255	2.37e-07	7.45e-06	1.81	1.81	40.2	22.3
MEG3	362	2.4e-07	7.51e-06	2.2	2.2	10.4	4.73
HMP19	216	2.5e-07	7.79e-06	1.9	1.9	15.8	8.32
RUSC2	457	2.51e-07	7.79e-06	1.95	1.95	37.9	19.5
LSG1	325	2.51e-07	7.79e-06	0.557	-1.79	24	43
UBE2H	511	2.52e-07	7.79e-06	1.92	1.92	49.1	25.5
GPR12	79.3	2.55e-07	7.87e-06	1.94	1.94	9.16	4.73
SLC19A3	21	2.55e-07	7.87e-06	0.314	-3.19	1.03	3.29
DOK6	187	2.56e-07	7.89e-06	1.95	1.95	16.8	8.61
PSTPIP2	62.5	2.6e-07	7.97e-06	0.445	-2.25	4.04	9.08
CKMT1B	353	2.62e-07	8.02e-06	0.521	-1.92	23.5	45
SCLY	162	2.63e-07	8.02e-06	0.519	-1.93	11.7	22.5
GPR155	154	2.63e-07	8.02e-06	1.83	1.83	18.4	10
PCDHB10	64.2	2.68e-07	8.16e-06	2.13	2.13	6.07	2.86
GPM6B	114	2.74e-07	8.32e-06	0.54	-1.85	7.06	13.1
ADAT2	125	2.77e-07	8.37e-06	0.545	-1.83	8.49	15.6
EPOP	146	2.78e-07	8.37e-06	0.528	-1.9	9.64	18.3
RPL26	7190	2.79e-07	8.4e-06	0.55	-1.82	398	723
FRMPD3	75	2.82e-07	8.43e-06	2.37	2.37	4.84	2.04
SOS2	447	2.82e-07	8.43e-06	1.72	1.72	47.2	27.5
COL14A1	27	2.82e-07	8.43e-06	0.325	-3.08	1.9	5.83
NAPB	300	2.84e-07	8.43e-06	1.81	1.81	24.9	13.8
ALDH1A3	77.7	2.84e-07	8.43e-06	2.36	2.36	9.15	3.87
DENND6B	22.9	2.84e-07	8.43e-06	2.63	2.63	2.68	1.02
PLXNA4	291	2.91e-07	8.61e-06	1.93	1.93	31.7	16.5
NPR2	343	2.93e-07	8.65e-06	1.8	1.8	30.5	17
SNX18	1090	2.94e-07	8.67e-06	1.78	1.78	106	59.7
WWC1	159	2.95e-07	8.67e-06	0.504	-1.98	11.3	22.5
TMEM130	54.4	3.07e-07	8.99e-06	2.33	2.33	5.69	2.44
CAD	1470	3.13e-07	9.17e-06	0.56	-1.79	105	187
DKK3	145	3.14e-07	9.17e-06	2.25	2.25	21.9	9.73
TAF1D	203	3.16e-07	9.19e-06	0.582	-1.72	12.9	22.2
ADAMTS9	661	3.17e-07	9.2e-06	1.76	1.76	106	60.6
CSRNP3	457	3.18e-07	9.21e-06	1.81	1.81	42.2	23.3
C1QL1	386	3.18e-07	9.21e-06	1.99	1.99	41.1	20.6
CMSS1	334	3.2e-07	9.24e-06	0.588	-1.7	25.6	43.6
PLXNC1	71.3	3.31e-07	9.53e-06	1.9	1.9	9.48	4.98
REEP2	241	3.32e-07	9.53e-06	1.86	1.86	22.9	12.3
RPS6	11000	3.33e-07	9.54e-06	0.548	-1.82	655	1190
PNRC1	965	3.34e-07	9.54e-06	1.86	1.86	87.8	47.3
SYTL4	921	3.36e-07	9.58e-06	2.02	2.02	93.6	46.3
METTL8	185	3.37e-07	9.58e-06	0.596	-1.68	13	21.9
CHST8	487	3.41e-07	9.67e-06	1.93	1.93	38.1	19.7
RUFY2	206	3.41e-07	9.67e-06	1.66	1.66	20.4	12.3
PPP1R18	424	3.44e-07	9.74e-06	1.91	1.91	42.4	22.1
KCNK3	414	3.51e-07	9.91e-06	1.9	1.9	39.3	20.7
MICAL2	28.7	3.54e-07	9.97e-06	0.407	-2.46	1.61	3.95
WDR43	1310	3.58e-07	1e-05	0.563	-1.78	93.5	166
PCDHB13	28.8	3.58e-07	1e-05	2.76	2.76	2.56	0.928
ZC2HC1A	187	3.63e-07	1.01e-05	1.72	1.72	17.9	10.4
BCAT1	3740	3.63e-07	1.01e-05	0.556	-1.8	235	422
CHPT1	147	3.77e-07	1.05e-05	0.535	-1.87	12.9	24.1
DUS3L	241	3.85e-07	1.07e-05	0.518	-1.93	17.2	33.2
P4HA1	177	3.93e-07	1.08e-05	0.503	-1.99	13.3	26.4
SLC25A32	312	3.93e-07	1.08e-05	0.568	-1.76	22.7	40
FAM131A	63.4	3.93e-07	1.08e-05	2.27	2.27	6.21	2.73
UNC79	410	4.02e-07	1.11e-05	1.67	1.67	35.9	21.5
IFI27L2	140	4.06e-07	1.12e-05	1.78	1.78	16.3	9.16
TUBB3	3340	4.08e-07	1.12e-05	1.86	1.86	249	134
FRAS1	156	4.13e-07	1.13e-05	0.49	-2.04	5.81	11.8
FJX1	158	4.15e-07	1.13e-05	0.53	-1.89	10.4	19.7
DIMT1	233	4.19e-07	1.14e-05	0.599	-1.67	17.5	29.3
TMEM59L	73.5	4.2e-07	1.14e-05	2.17	2.17	5.55	2.55
PTP4A3	104	4.24e-07	1.15e-05	2.05	2.05	8.5	4.15
ACAP2	414	4.25e-07	1.15e-05	0.611	-1.64	32.6	53.4
CLSTN3	218	4.28e-07	1.16e-05	2.03	2.03	18.8	9.26
MLLT11	2580	4.35e-07	1.17e-05	1.86	1.86	273	147
C14orf132	4670	4.38e-07	1.18e-05	1.8	1.8	489	271
SETD6	111	4.44e-07	1.19e-05	0.565	-1.77	7.27	12.9
IGFBP4	174	4.52e-07	1.21e-05	0.448	-2.23	14.2	31.7
RARB	45.4	4.53e-07	1.21e-05	2.07	2.07	5.75	2.77
FAM162A	91.4	4.54e-07	1.21e-05	0.537	-1.86	6.06	11.3
HELZ2	185	4.61e-07	1.23e-05	1.96	1.96	14.7	7.49
WNT6	31.4	4.7e-07	1.25e-05	2.36	2.36	4.06	1.72
RBP3	14.9	4.78e-07	1.27e-05	3.61	3.61	1.72	0.476
DFFA	217	4.79e-07	1.27e-05	0.55	-1.82	14.7	26.7
ARHGAP23	146	4.86e-07	1.28e-05	1.86	1.86	11.5	6.19
USP36	298	4.87e-07	1.28e-05	0.549	-1.82	19.4	35.4
PXDN	242	4.88e-07	1.28e-05	0.576	-1.74	17.1	29.8
SNN	875	4.93e-07	1.29e-05	1.93	1.93	69.3	35.8
DDX21	1920	4.96e-07	1.3e-05	0.55	-1.82	134	243
PTPRN	486	5e-07	1.3e-05	1.97	1.97	54.1	27.4
LGALS1	23.5	5.02e-07	1.31e-05	3.69	3.69	3.88	1.05
PKIB	327	5.05e-07	1.31e-05	1.76	1.76	39.3	22.3
PPAT	634	5.11e-07	1.33e-05	0.559	-1.79	48.5	86.7
CRYZ	192	5.2e-07	1.35e-05	0.587	-1.7	15.9	27.2
PUS7	458	5.22e-07	1.35e-05	0.566	-1.77	33.2	58.6
LINC02246	138	5.25e-07	1.35e-05	1.75	1.75	15.2	8.68
ST8SIA2	259	5.33e-07	1.37e-05	2.44	2.44	36.6	15
POLR3E	247	5.41e-07	1.39e-05	0.579	-1.73	17.4	30.1
GOLGA7B	187	5.44e-07	1.39e-05	1.77	1.77	19.5	11
NATD1	88.3	5.5e-07	1.41e-05	1.95	1.95	7.18	3.69
NDUFAF2	104	5.55e-07	1.42e-05	0.529	-1.89	8.43	15.9
KIF3C	1200	5.56e-07	1.42e-05	1.86	1.86	107	57.5
WDR47	575	5.68e-07	1.44e-05	1.91	1.91	56.7	29.6
C1QL4	84.9	5.69e-07	1.44e-05	2.02	2.02	11.1	5.48
DCAF4	125	5.83e-07	1.48e-05	0.537	-1.86	8.56	15.9
PLCB1	174	5.87e-07	1.48e-05	1.78	1.78	30.3	17.1
ARRDC3	430	6.13e-07	1.54e-05	1.73	1.73	46.4	26.9
SPOCK1	102	6.21e-07	1.56e-05	2.51	2.51	4.49	1.79
EXOSC5	193	6.21e-07	1.56e-05	0.556	-1.8	13.9	24.9
TTC9	38.5	6.56e-07	1.64e-05	2.25	2.25	4.77	2.12
TRMT61A	112	6.61e-07	1.65e-05	0.54	-1.85	7.42	13.7
RPF2	433	6.68e-07	1.67e-05	0.582	-1.72	31.1	53.4
KLF15	19.4	6.8e-07	1.69e-05	0.351	-2.85	1.01	2.89
CDC42EP3	712	6.81e-07	1.69e-05	1.82	1.82	96.1	52.9
REEP1	270	6.89e-07	1.71e-05	1.83	1.83	32.9	18
CAPN1	550	6.94e-07	1.72e-05	1.91	1.91	62.1	32.5
RPL35	3730	6.97e-07	1.72e-05	0.581	-1.72	253	435
REXO2	55.5	7e-07	1.73e-05	0.493	-2.03	3.73	7.57
ENO2	664	7.03e-07	1.73e-05	1.92	1.92	62.7	32.7
WDR4	91.2	7.05e-07	1.73e-05	0.549	-1.82	6.09	11.1
TTF2	586	7.1e-07	1.74e-05	0.588	-1.7	47.4	80.7
TMA16	288	7.12e-07	1.74e-05	0.612	-1.64	20.4	33.4
RPL17	7650	7.16e-07	1.75e-05	0.586	-1.71	445	759
PPRC1	429	7.22e-07	1.76e-05	0.55	-1.82	28.8	52.4
TFAP4	209	7.27e-07	1.77e-05	0.554	-1.81	15.2	27.4
PEG10	536	7.41e-07	1.8e-05	0.517	-1.93	33.5	64.7
GDI1	1430	7.44e-07	1.8e-05	1.88	1.88	139	74
LPAR3	44.1	7.57e-07	1.83e-05	0.434	-2.31	3.43	7.91
PRMT3	280	7.62e-07	1.84e-05	0.591	-1.69	22	37.3
DNAJC2	238	7.71e-07	1.86e-05	0.58	-1.72	17.8	30.6
RPL36	2950	7.72e-07	1.86e-05	0.587	-1.7	184	314
PAGE1	91.2	7.73e-07	1.86e-05	0.479	-2.09	6.6	13.8
SYT4	821	7.76e-07	1.86e-05	1.85	1.85	110	59.3
CHST2	347	7.8e-07	1.86e-05	0.522	-1.92	21.6	41.5
BRINP1	111	7.86e-07	1.88e-05	1.92	1.92	14.8	7.72
TMEM108	206	7.92e-07	1.89e-05	1.78	1.78	35	19.7
SFXN4	169	7.99e-07	1.9e-05	0.605	-1.65	11.3	18.7
CCDC88C	245	8.06e-07	1.91e-05	0.555	-1.8	11.6	20.8
GMIP	300	8.1e-07	1.92e-05	1.71	1.71	25.1	14.7
DBH	37.5	8.19e-07	1.94e-05	3.02	3.02	7.99	2.65
KLHL13	924	8.21e-07	1.94e-05	2.06	2.06	119	57.9
ACSS1	78.8	8.26e-07	1.94e-05	0.519	-1.93	5.27	10.2
CECR6	126	8.27e-07	1.94e-05	2	2	12.4	6.22
HMCN1	54.5	8.41e-07	1.97e-05	0.484	-2.07	4.04	8.36
PINK1	74.9	8.67e-07	2.03e-05	2.28	2.28	7.85	3.44
SLC29A1	214	8.73e-07	2.04e-05	0.587	-1.7	18.7	31.9
NPPA	84.6	8.77e-07	2.04e-05	2.21	2.21	2.09	0.947
ATP1B3	380	8.78e-07	2.04e-05	0.596	-1.68	30	50.3
PDE4D	63.7	8.78e-07	2.04e-05	2.13	2.13	10.1	4.75
PALM2	65.4	9.07e-07	2.11e-05	0.466	-2.15	3.42	7.34
MAK16	374	9.2e-07	2.13e-05	0.581	-1.72	27.3	47
DDX55	260	9.34e-07	2.16e-05	0.583	-1.71	18.9	32.4
SCML1	93.9	9.34e-07	2.16e-05	0.574	-1.74	8.06	14
MAP3K13	610	9.43e-07	2.17e-05	1.73	1.73	50.9	29.4
MRAS	257	9.45e-07	2.17e-05	1.78	1.78	26.6	14.9
C19orf48	512	9.61e-07	2.21e-05	0.604	-1.66	41.6	68.8
TSC22D3	264	9.7e-07	2.22e-05	1.84	1.84	25.7	14
YPEL3	72.8	9.81e-07	2.24e-05	2	2	6.79	3.39
ELAVL4	2260	1.01e-06	2.3e-05	1.73	1.73	216	125
FRMPD1	285	1.03e-06	2.34e-05	1.74	1.74	22.4	12.9
DYRK1B	170	1.03e-06	2.35e-05	1.82	1.82	12.7	6.95
GEMIN5	755	1.06e-06	2.4e-05	0.555	-1.8	53.2	96
PCDH1	31.9	1.07e-06	2.42e-05	2.69	2.69	3.83	1.42
PCDHB14	127	1.07e-06	2.42e-05	1.82	1.82	12.9	7.11
PHLDB2	685	1.08e-06	2.43e-05	0.62	-1.61	60.5	97.5
FXN	122	1.08e-06	2.43e-05	0.593	-1.69	8.58	14.5
NLGN3	35.9	1.09e-06	2.45e-05	2.21	2.21	4.22	1.9
KIRREL	224	1.11e-06	2.5e-05	0.534	-1.87	17	31.9
FAT1	266	1.12e-06	2.52e-05	0.541	-1.85	21.6	39.8
ZNF587B	133	1.13e-06	2.53e-05	0.597	-1.68	9.17	15.4
ARHGEF37	19.8	1.13e-06	2.53e-05	2.68	2.68	1.98	0.738
SLC25A19	76	1.14e-06	2.53e-05	0.525	-1.9	6.03	11.5
ABCE1	1530	1.14e-06	2.53e-05	0.601	-1.66	112	186
PLXNA3	319	1.16e-06	2.58e-05	1.74	1.74	21.3	12.2
PIK3CD	46.2	1.17e-06	2.6e-05	2.29	2.29	3.49	1.53
CTNNAL1	374	1.17e-06	2.6e-05	0.604	-1.66	33.7	55.8
FAM84A	14300	1.18e-06	2.6e-05	1.72	1.72	1180	685
PAK3	451	1.2e-06	2.65e-05	1.77	1.77	45.1	25.5
JPH1	53.7	1.2e-06	2.65e-05	0.458	-2.19	3.54	7.74
CSDC2	56.8	1.22e-06	2.69e-05	2.11	2.11	3.41	1.61
NCOA7	234	1.23e-06	2.7e-05	1.73	1.73	23.7	13.7
SIX4	136	1.24e-06	2.71e-05	0.597	-1.68	8.58	14.4
ZBTB20	43.7	1.25e-06	2.74e-05	2.18	2.18	3.55	1.62
KAZN	62.9	1.25e-06	2.74e-05	2.3	2.3	7.76	3.38
SNHG8	164	1.26e-06	2.75e-05	0.596	-1.68	10.7	18
SRM	218	1.27e-06	2.75e-05	0.575	-1.74	14.6	25.4
ARHGAP29	310	1.28e-06	2.78e-05	1.71	1.71	57.4	33.5
E2F5	117	1.28e-06	2.78e-05	0.593	-1.69	8.58	14.5
GUCY1A3	111	1.29e-06	2.79e-05	0.594	-1.68	7.01	11.8
TEX15	129	1.29e-06	2.8e-05	0.54	-1.85	10.6	19.6
RELN	34.9	1.33e-06	2.87e-05	2.86	2.86	0.875	0.305
OLFM3	25.9	1.35e-06	2.9e-05	2.29	2.29	3.46	1.51
CNGA3	282	1.37e-06	2.95e-05	1.72	1.72	39.2	22.8
TFB2M	217	1.4e-06	3.01e-05	0.604	-1.66	15.4	25.6
IGSF9	122	1.41e-06	3.02e-05	0.575	-1.74	7.49	13
TRMT1	376	1.41e-06	3.03e-05	0.599	-1.67	25.6	42.7
ERLIN1	230	1.42e-06	3.03e-05	0.61	-1.64	19.8	32.4
NT5DC3	401	1.42e-06	3.03e-05	0.559	-1.79	29.4	52.6
STEAP3	35.4	1.43e-06	3.04e-05	0.428	-2.33	2.3	5.36
NRG1	179	1.45e-06	3.08e-05	1.73	1.73	15.9	9.15
NSG1	300	1.47e-06	3.12e-05	1.8	1.8	21.3	11.8
CACNB3	293	1.48e-06	3.13e-05	1.83	1.83	30.6	16.8
FYCO1	95.1	1.48e-06	3.13e-05	0.557	-1.79	6.38	11.5
MDN1	1700	1.51e-06	3.19e-05	0.574	-1.74	108	188
PAK1IP1	195	1.54e-06	3.24e-05	0.559	-1.79	14	25
NOP56	1190	1.54e-06	3.24e-05	0.612	-1.63	93.2	152
CDKN2D	61.8	1.56e-06	3.28e-05	1.97	1.97	6.13	3.12
MAP3K21	19.3	1.56e-06	3.28e-05	0.374	-2.67	1.19	3.18
CBS	624	1.57e-06	3.28e-05	0.592	-1.69	42.5	71.8
LINC00998	137	1.57e-06	3.29e-05	0.577	-1.73	9.34	16.2
SIGMAR1	627	1.59e-06	3.31e-05	0.576	-1.74	45	78.3
ANK3	619	1.6e-06	3.34e-05	1.74	1.74	62.3	35.8
HES6	249	1.61e-06	3.35e-05	0.579	-1.73	18.5	31.9
ARHGEF26	18.9	1.65e-06	3.42e-05	0.356	-2.81	1.03	2.9
PTCD2	82.4	1.66e-06	3.43e-05	0.583	-1.71	5.84	10
SLC22A18	21.9	1.67e-06	3.46e-05	2.64	2.64	2.02	0.765
H19	43.7	1.71e-06	3.54e-05	2.71	2.71	9.75	3.59
APBA1	458	1.72e-06	3.54e-05	2.01	2.01	50.8	25.3
NHLH2	1160	1.72e-06	3.54e-05	1.69	1.69	93.6	55.3
PALM	410	1.74e-06	3.59e-05	1.82	1.82	40.9	22.5
CDKN1C	91.5	1.75e-06	3.59e-05	1.86	1.86	7.88	4.23
RNF182	309	1.79e-06	3.66e-05	1.9	1.9	29.8	15.6
SERPINF1	678	1.79e-06	3.66e-05	0.545	-1.83	51.2	93.9
RPS14	7490	1.79e-06	3.66e-05	0.605	-1.65	459	758
PAQR5	16.7	1.81e-06	3.69e-05	0.375	-2.67	0.773	2.06
FBL	698	1.83e-06	3.72e-05	0.58	-1.72	49.7	85.7
LINGO2	23.4	1.84e-06	3.74e-05	2.46	2.46	2.86	1.16
RPS17	12700	1.88e-06	3.82e-05	0.594	-1.68	780	1310
PPAN-P2RY11	92.2	1.89e-06	3.83e-05	0.496	-2.02	5.5	11.1
TMEM123	316	1.92e-06	3.88e-05	0.576	-1.74	24.8	43.1
NOL6	590	1.93e-06	3.9e-05	0.576	-1.74	40.5	70.4
CDYL2	81.3	1.96e-06	3.95e-05	1.8	1.8	7.43	4.13
TRPM4	57.2	1.97e-06	3.96e-05	1.88	1.88	6.03	3.2
TXN	1190	1.97e-06	3.96e-05	0.628	-1.59	87.8	140
RAB12	90.6	1.98e-06	3.97e-05	0.586	-1.71	6.36	10.9
DCAF13	571	1.98e-06	3.97e-05	0.606	-1.65	41.1	67.8
ITGB3BP	154	2.01e-06	4.02e-05	0.581	-1.72	12	20.6
PCDHB11	80.2	2.01e-06	4.02e-05	1.86	1.86	7.15	3.84
PNPT1	735	2.02e-06	4.04e-05	0.597	-1.68	52.7	88.3
RXRG	229	2.06e-06	4.09e-05	1.86	1.86	7.88	4.24
P4HTM	32.8	2.06e-06	4.09e-05	2.43	2.43	4.28	1.76
EARS2	305	2.07e-06	4.1e-05	0.582	-1.72	22.3	38.3
RPS2	14800	2.07e-06	4.1e-05	0.598	-1.67	962	1610
TCAF1	1880	2.08e-06	4.12e-05	1.77	1.77	183	104
ARHGDIG	90.5	2.1e-06	4.14e-05	1.81	1.81	8.29	4.59
SHISA6	83.1	2.1e-06	4.14e-05	1.95	1.95	10.9	5.58
ANKS6	195	2.1e-06	4.14e-05	0.574	-1.74	13.8	24
TRIL	56.4	2.13e-06	4.19e-05	3.6	3.6	14.1	3.91
SAMD14	264	2.14e-06	4.19e-05	1.76	1.76	24.6	14
TMEM100	27.5	2.14e-06	4.2e-05	2.07	2.07	3.06	1.48
NSUN2	525	2.16e-06	4.23e-05	0.599	-1.67	38.1	63.5
ZNF692	94.1	2.21e-06	4.31e-05	0.577	-1.73	5.83	10.1
CARNMT1	87.5	2.27e-06	4.42e-05	0.59	-1.7	5.65	9.58
LRRTM2	399	2.3e-06	4.47e-05	1.72	1.72	25.4	14.8
ZSWIM8	328	2.32e-06	4.51e-05	1.71	1.71	30.7	18
EXOSC7	248	2.34e-06	4.55e-05	0.618	-1.62	18.8	30.4
WDR35	398	2.36e-06	4.58e-05	0.622	-1.61	29.9	48.1
LOC642366	205	2.37e-06	4.58e-05	1.67	1.67	15	8.94
DUSP4	806	2.39e-06	4.62e-05	1.84	1.84	72	39.1
CTNNBIP1	111	2.41e-06	4.65e-05	1.83	1.83	12.5	6.81
LTA4H	956	2.41e-06	4.65e-05	0.575	-1.74	65.3	114
CHORDC1	411	2.42e-06	4.66e-05	0.633	-1.58	29.7	46.9
ATP5G1	724	2.43e-06	4.67e-05	0.619	-1.61	54.4	87.8
SERBP1	5320	2.47e-06	4.74e-05	0.586	-1.71	388	663
RFPL1S	41.2	2.5e-06	4.79e-05	1.94	1.94	4.95	2.55
GPRIN3	934	2.53e-06	4.82e-05	1.78	1.78	82.4	46.4
RCC1	260	2.53e-06	4.82e-05	0.593	-1.69	20.3	34.3
POLR3D	372	2.53e-06	4.82e-05	0.61	-1.64	23.7	38.9
MMP24-AS1	59.9	2.54e-06	4.84e-05	1.89	1.89	5.79	3.07
CIART	37.8	2.56e-06	4.86e-05	0.498	-2.01	2.2	4.41
CUL4A	485	2.56e-06	4.86e-05	0.607	-1.65	36.6	60.3
RPIA	130	2.58e-06	4.88e-05	0.596	-1.68	9.96	16.7
HIPK3	577	2.58e-06	4.88e-05	1.57	1.57	53.7	34.2
NDRG1	130	2.59e-06	4.89e-05	2.09	2.09	14.4	6.9
C2orf91	15.5	2.6e-06	4.91e-05	2.69	2.69	1.82	0.677
NDRG4	576	2.6e-06	4.91e-05	1.93	1.93	85.8	44.5
CKMT1A	502	2.62e-06	4.92e-05	0.538	-1.86	34.6	64.4
C12orf66	61.3	2.69e-06	5.04e-05	0.568	-1.76	4.64	8.17
TSR1	738	2.71e-06	5.08e-05	0.596	-1.68	53.5	89.9
TRAP1	847	2.71e-06	5.08e-05	0.583	-1.72	59.1	101
MORC4	57.6	2.73e-06	5.1e-05	0.556	-1.8	4.71	8.46
AHRR	39.5	2.76e-06	5.15e-05	2.45	2.45	0.921	0.377
HEATR1	1580	2.79e-06	5.2e-05	0.608	-1.65	113	187
KCNB2	810	2.81e-06	5.22e-05	1.57	1.57	89.8	57.3
RPL29	6250	2.81e-06	5.22e-05	0.617	-1.62	393	636
NETO1	42	2.81e-06	5.22e-05	0.507	-1.97	2.97	5.86
SYBU	565	2.83e-06	5.24e-05	1.67	1.67	35	20.9
RPL5	11800	2.84e-06	5.26e-05	0.619	-1.62	729	1180
TRABD	143	2.88e-06	5.32e-05	0.598	-1.67	10.1	16.9
DNAJC12	269	2.88e-06	5.32e-05	0.629	-1.59	14.4	22.8
GABRA5	95.5	2.89e-06	5.33e-05	0.518	-1.93	8.36	16.1
CALCOCO1	200	2.9e-06	5.33e-05	1.77	1.77	16.6	9.39
AKAP1	819	2.91e-06	5.33e-05	0.607	-1.65	57.2	94.2
SPSB4	259	2.91e-06	5.33e-05	1.74	1.74	33.1	19
ABAT	117	2.92e-06	5.34e-05	1.66	1.66	10.1	6.13
PAM16	102	2.92e-06	5.35e-05	0.585	-1.71	6.93	11.8
NME2	5170	2.93e-06	5.36e-05	0.619	-1.61	394	637
NPL	20.9	2.96e-06	5.4e-05	0.387	-2.59	1.19	3.06
RAB3D	299	2.98e-06	5.43e-05	1.8	1.8	29.9	16.6
PLPPR3	523	2.99e-06	5.44e-05	1.81	1.81	43.9	24.3
DBNDD1	168	3.07e-06	5.57e-05	1.69	1.69	16.2	9.61
RHBDL3	220	3.08e-06	5.59e-05	1.69	1.69	21.3	12.6
PGM2L1	178	3.1e-06	5.62e-05	1.69	1.69	14.4	8.51
FAM49A	72.3	3.13e-06	5.66e-05	1.88	1.88	7.18	3.82
GREB1L	461	3.13e-06	5.66e-05	1.62	1.62	47.4	29.3
RPL27	9650	3.15e-06	5.67e-05	0.588	-1.7	583	991
ENO1	5480	3.15e-06	5.67e-05	0.565	-1.77	415	734
CSPG4	34.3	3.18e-06	5.72e-05	0.44	-2.27	1.52	3.45
SGCB	671	3.21e-06	5.76e-05	1.65	1.65	72.5	43.9
CHRM2	98.8	3.21e-06	5.76e-05	1.91	1.91	18.5	9.71
PCBP4	1100	3.22e-06	5.77e-05	1.71	1.71	98.5	57.5
SYNPO2	671	3.23e-06	5.77e-05	1.77	1.77	62	35
IQSEC1	976	3.24e-06	5.78e-05	1.84	1.84	62.2	33.8
MRPL12	351	3.24e-06	5.78e-05	0.627	-1.6	27.4	43.6
LRP10	124	3.27e-06	5.82e-05	1.76	1.76	10.5	5.96
C15orf62	77.3	3.28e-06	5.83e-05	1.73	1.73	10.5	6.03
ETV1	224	3.3e-06	5.85e-05	1.69	1.69	21.8	12.9
GTF2IP4	1390	3.3e-06	5.85e-05	1.65	1.65	138	84
LOC100126784	81.5	3.3e-06	5.85e-05	1.76	1.76	7.34	4.17
DRAXIN	101	3.33e-06	5.88e-05	1.72	1.72	12.1	7.02
NAP1L5	219	3.36e-06	5.93e-05	1.78	1.78	20.5	11.5
ANK1	130	3.41e-06	6e-05	1.68	1.68	12.6	7.5
SNHG15	145	3.46e-06	6.08e-05	0.584	-1.71	10.2	17.5
LTBP3	189	3.46e-06	6.08e-05	1.71	1.71	18.8	11
NREP	2700	3.47e-06	6.08e-05	1.63	1.63	247	151
WBSCR17	357	3.47e-06	6.08e-05	1.65	1.65	30.3	18.4
JAKMIP2	672	3.48e-06	6.08e-05	1.61	1.61	62.3	38.7
GAS5	1000	3.48e-06	6.08e-05	0.607	-1.65	45.7	75.2
SLC44A2	258	3.51e-06	6.12e-05	1.74	1.74	27.4	15.8
PA2G4	1880	3.6e-06	6.28e-05	0.576	-1.74	144	249
APH1B	285	3.61e-06	6.28e-05	1.63	1.63	28.7	17.5
B4GALNT3	68.1	3.65e-06	6.34e-05	0.55	-1.82	4.53	8.24
GCNT2	157	3.66e-06	6.34e-05	1.67	1.67	12.3	7.36
CCDC92	93.1	3.7e-06	6.41e-05	1.77	1.77	9.27	5.24
WDR77	584	3.73e-06	6.45e-05	0.576	-1.74	43.7	75.8
RENBP	18.6	3.74e-06	6.47e-05	2.92	2.92	1.75	0.6
WDR46	368	3.76e-06	6.49e-05	0.579	-1.73	26.6	46
RALGPS1	61.5	3.8e-06	6.55e-05	1.79	1.79	5.59	3.13
CERS4	32.4	3.84e-06	6.61e-05	2.11	2.11	3.21	1.53
MAPK4	121	3.88e-06	6.68e-05	1.68	1.68	13.3	7.95
ELK3	157	3.89e-06	6.68e-05	0.582	-1.72	12.2	20.9
SLC25A15	329	3.95e-06	6.77e-05	0.616	-1.62	25.8	41.9
DDX10	286	3.97e-06	6.79e-05	0.62	-1.61	22.1	35.7
PMM2	171	3.98e-06	6.81e-05	0.62	-1.61	12.2	19.7
UTP18	797	3.99e-06	6.81e-05	0.615	-1.63	61.4	99.8
SMG1P2	75.2	4.01e-06	6.84e-05	0.562	-1.78	4.78	8.5
SLC37A1	23.4	4.03e-06	6.86e-05	2.36	2.36	1.52	0.641
PSAT1	457	4.03e-06	6.86e-05	0.598	-1.67	35.9	60
DIEXF	382	4.06e-06	6.89e-05	0.583	-1.71	25.6	44
PCDHB12	37.4	4.06e-06	6.89e-05	2.1	2.1	3.02	1.44
TSPOAP1	34.8	4.11e-06	6.96e-05	2.34	2.34	1.83	0.783
PLCH2	156	4.16e-06	7.04e-05	0.547	-1.83	5.35	9.77
RSAD1	309	4.17e-06	7.04e-05	0.59	-1.7	21.8	37
YDJC	62.3	4.19e-06	7.07e-05	0.557	-1.8	4.5	8.07
NYAP2	18	4.22e-06	7.11e-05	2.8	2.8	1.51	0.538
UFL1	234	4.24e-06	7.14e-05	0.629	-1.59	18.7	29.7
CTSC	400	4.25e-06	7.14e-05	0.621	-1.61	32.5	52.3
RGS10	133	4.25e-06	7.14e-05	0.598	-1.67	7.51	12.6
RPL8	8650	4.27e-06	7.14e-05	0.615	-1.63	593	964
PGAM5	570	4.27e-06	7.14e-05	0.585	-1.71	44.6	76.3
EEF2K	266	4.28e-06	7.15e-05	0.595	-1.68	20.1	33.7
MAPRE3	84.8	4.3e-06	7.18e-05	1.83	1.83	7.05	3.85
SIPA1L1	46.2	4.32e-06	7.2e-05	0.52	-1.92	3.01	5.78
RARA-AS1	15.7	4.37e-06	7.27e-05	3.3	3.3	1.69	0.511
EEF1A2	722	4.42e-06	7.35e-05	1.84	1.84	68.1	37.1
RNF165	258	4.44e-06	7.37e-05	1.6	1.6	22	13.8
MAP3K12	243	4.48e-06	7.43e-05	1.68	1.68	20.6	12.3
XKR7	426	4.53e-06	7.5e-05	1.66	1.66	25.4	15.3
BCL2	357	4.55e-06	7.52e-05	1.79	1.79	56.3	31.5
SLC43A1	31.6	4.59e-06	7.58e-05	0.459	-2.18	1.86	4.05
NOB1	245	4.62e-06	7.61e-05	0.572	-1.75	16	28
CYYR1	167	4.7e-06	7.75e-05	0.603	-1.66	12.4	20.6
TTLL12	473	4.75e-06	7.82e-05	0.557	-1.8	33.5	60.2
HGSNAT	138	4.8e-06	7.89e-05	1.78	1.78	16	9.04
KATNAL1	447	4.87e-06	7.99e-05	1.59	1.59	50.3	31.7
PRPS2	240	4.88e-06	7.99e-05	0.559	-1.79	20.4	36.5
NAA25	622	4.89e-06	7.99e-05	0.628	-1.59	46.1	73.4
TLE4	485	4.89e-06	7.99e-05	1.57	1.57	44.3	28.2
CPEB4	255	4.91e-06	8e-05	1.67	1.67	20.6	12.3
SEZ6L2	806	4.93e-06	8.04e-05	1.82	1.82	83.7	45.9
SNHG17	51.2	4.95e-06	8.06e-05	0.558	-1.79	3.34	5.99
FMN1	82.8	4.99e-06	8.11e-05	1.89	1.89	10.1	5.33
C18orf32	278	5.08e-06	8.25e-05	1.63	1.63	25.5	15.6
WDR44	123	5.11e-06	8.28e-05	1.75	1.75	12.8	7.33
NDUFAF4	334	5.13e-06	8.3e-05	0.631	-1.58	23.9	37.8
DPF3	133	5.21e-06	8.42e-05	1.64	1.64	16.6	10.1
FAM212B-AS1	158	5.23e-06	8.44e-05	1.7	1.7	17.4	10.2
ACTN2	17.8	5.24e-06	8.46e-05	0.346	-2.89	0.722	2.09
GLB1L2	40.3	5.27e-06	8.48e-05	0.494	-2.02	2.81	5.7
NR2F2	76.3	5.32e-06	8.56e-05	0.521	-1.92	4.51	8.67
UBL3	188	5.37e-06	8.63e-05	1.65	1.65	16.7	10.1
C20orf27	302	5.42e-06	8.68e-05	0.605	-1.65	21.6	35.8
PWP2	343	5.42e-06	8.68e-05	0.587	-1.7	24.9	42.4
GTF2IP1	669	5.46e-06	8.74e-05	1.68	1.68	68.5	40.9
NTRK1	1980	5.62e-06	8.98e-05	1.72	1.72	180	105
PDSS1	88.8	5.65e-06	9.02e-05	0.586	-1.71	6.72	11.5
CDH5	13.2	5.68e-06	9.06e-05	2.85	2.85	1.4	0.49
LAMA5	135	5.7e-06	9.07e-05	1.72	1.72	8.99	5.23
CHRNA3	6060	5.73e-06	9.12e-05	1.71	1.71	638	374
GPR162	216	5.77e-06	9.16e-05	1.7	1.7	20	11.8
AK2	528	5.78e-06	9.17e-05	0.64	-1.56	41.5	64.9
XPOT	1530	5.85e-06	9.25e-05	0.613	-1.63	116	190
MTFP1	106	5.85e-06	9.25e-05	0.561	-1.78	8.46	15.1
FKBP1B	108	5.85e-06	9.25e-05	1.59	1.59	11.3	7.08
EMG1	229	5.88e-06	9.28e-05	0.627	-1.59	17.3	27.5
PFAS	1190	5.89e-06	9.29e-05	0.607	-1.65	86.8	143
GOLGA8A	149	5.93e-06	9.34e-05	0.502	-1.99	8.45	16.8
SORCS2	48.4	5.94e-06	9.34e-05	1.77	1.77	3.65	2.06
ZNF627	627	5.95e-06	9.34e-05	1.56	1.56	56.1	36.1
TUBB2B	5290	5.98e-06	9.38e-05	1.73	1.73	395	229
ENO3	343	6.03e-06	9.45e-05	1.66	1.66	29	17.5
ADAMTS8	69.2	6.04e-06	9.45e-05	1.98	1.98	12.9	6.48
ARHGEF10L	169	6.06e-06	9.47e-05	1.74	1.74	15.5	8.88
LRRC4	50.9	6.13e-06	9.57e-05	1.91	1.91	4.8	2.51
CEP83	192	6.17e-06	9.62e-05	0.644	-1.55	14.8	22.9
MFSD6	108	6.21e-06	9.66e-05	1.6	1.6	9.96	6.23
AATK	91.2	6.22e-06	9.66e-05	1.64	1.64	7.5	4.57
IQSEC3	31.1	6.22e-06	9.66e-05	2.3	2.3	2.89	1.26
MTRR	149	6.26e-06	9.71e-05	0.634	-1.58	11.3	17.9
NBEAL2	90	6.29e-06	9.75e-05	0.587	-1.7	6.06	10.3
RAI2	21.1	6.46e-06	0.0001	2.54	2.54	2.4	0.947
MYCL	32	6.56e-06	0.000101	0.452	-2.21	1.9	4.21
C15orf39	124	6.6e-06	0.000102	0.521	-1.92	8.1	15.6
KIF13B	145	6.67e-06	0.000103	1.78	1.78	15.1	8.49
TPPP	132	6.68e-06	0.000103	1.64	1.64	9.95	6.08
TBC1D9	362	6.74e-06	0.000104	1.68	1.68	34	20.3
EML5	298	6.86e-06	0.000105	1.62	1.62	38.6	23.9
CCNA1	40.7	6.92e-06	0.000106	2.01	2.01	6.63	3.3
GRWD1	381	6.96e-06	0.000107	0.621	-1.61	29.8	48
LTBP1	69.4	6.97e-06	0.000107	0.483	-2.07	6.38	13.2
SLC22A15	107	7.01e-06	0.000107	1.59	1.59	10.7	6.7
MICAL1	960	7.04e-06	0.000107	1.62	1.62	77.3	47.6
RALYL	200	7.08e-06	0.000108	1.61	1.61	20	12.4
NOM1	222	7.11e-06	0.000108	0.643	-1.56	17.2	26.8
KDM5B	2310	7.25e-06	0.00011	1.73	1.73	184	107
NHLH1	437	7.28e-06	0.000111	1.73	1.73	13.4	7.75
CACNA1C	170	7.32e-06	0.000111	1.63	1.63	11.2	6.84
CACFD1	171	7.33e-06	0.000111	1.73	1.73	16.7	9.68
ODC1	3000	7.38e-06	0.000112	0.613	-1.63	230	375
PINX1	158	7.43e-06	0.000112	0.624	-1.6	12.4	19.8
PABPC1	4600	7.53e-06	0.000114	0.529	-1.89	271	511
COL6A2	480	7.56e-06	0.000114	1.69	1.69	53.3	31.6
MAGOH	269	7.59e-06	0.000114	0.639	-1.56	22.8	35.7
THUMPD2	202	7.65e-06	0.000115	0.648	-1.54	15.5	24
RPL32	7510	7.71e-06	0.000116	0.648	-1.54	481	742
KAT2A	246	7.73e-06	0.000116	0.598	-1.67	17.4	29.1
ARL6IP5	625	7.74e-06	0.000116	1.55	1.55	65.8	42.6
NEUROG2	543	7.79e-06	0.000117	1.71	1.71	75.9	44.4
TCOF1	767	7.79e-06	0.000117	0.615	-1.63	59.2	96.2
LOC100294145	1010	7.81e-06	0.000117	1.53	1.53	79.2	51.8
TPST1	128	7.93e-06	0.000118	1.63	1.63	15.1	9.27
ZNF814	264	7.94e-06	0.000118	0.639	-1.57	17.9	28
PLEKHH3	256	7.96e-06	0.000118	1.74	1.74	30.1	17.3
NFASC	455	7.97e-06	0.000118	1.63	1.63	35	21.5
MEIS1-AS3	177	7.98e-06	0.000118	1.58	1.58	17.9	11.4
TTC27	171	8e-06	0.000119	0.618	-1.62	13.1	21.2
NIFK	484	8e-06	0.000119	0.638	-1.57	35	54.9
RPS4Y1	2320	8.02e-06	0.000119	0.642	-1.56	146	228
GPR173	147	8.06e-06	0.000119	1.59	1.59	10.7	6.74
MIPEP	66.3	8.09e-06	0.000119	0.543	-1.84	4.89	9.01
PDLIM7	163	8.09e-06	0.000119	1.62	1.62	15	9.24
PTPN21	211	8.11e-06	0.000119	1.62	1.62	21.7	13.4
BDH2	123	8.19e-06	0.00012	0.61	-1.64	9.54	15.6
CDCA7L	338	8.2e-06	0.00012	0.651	-1.54	31.2	48
KAT2B	29.6	8.22e-06	0.000121	1.95	1.95	2.35	1.2
RPP40	36.8	8.24e-06	0.000121	0.525	-1.9	2.51	4.77
QTRT1	143	8.27e-06	0.000121	0.626	-1.6	9.86	15.8
CCNB1IP1	870	8.31e-06	0.000122	0.646	-1.55	56.4	87.3
PTRH2	313	8.35e-06	0.000122	0.654	-1.53	23.8	36.4
MBLAC2	93.1	8.42e-06	0.000123	0.623	-1.61	6.67	10.7
FBLIM1	58.5	8.53e-06	0.000124	1.94	1.94	5.98	3.09
NEDD9	104	8.6e-06	0.000125	1.96	1.96	19.3	9.83
DHX33	342	8.67e-06	0.000126	0.563	-1.78	21.7	38.5
KIAA1324L	164	8.68e-06	0.000126	1.7	1.7	20.4	12
AMD1	1310	8.73e-06	0.000127	0.656	-1.52	105	159
B3GALNT2	646	8.74e-06	0.000127	0.646	-1.55	51	78.9
MAGED2	1780	8.77e-06	0.000127	1.69	1.69	188	111
DENND5B	708	8.89e-06	0.000129	1.63	1.63	76.4	46.9
BASP1	1950	8.96e-06	0.000129	1.63	1.63	174	107
ITGA1	246	8.98e-06	0.00013	1.58	1.58	23.8	15.1
PM20D2	416	9e-06	0.00013	0.653	-1.53	35.9	55
LMTK3	33.7	9.11e-06	0.000131	2	2	2.76	1.38
PNPLA8	356	9.14e-06	0.000131	1.57	1.57	34.8	22.1
TIMM50	657	9.17e-06	0.000132	0.619	-1.62	43.8	70.8
RPS3A	16000	9.17e-06	0.000132	0.612	-1.63	987	1610
COQ8A	641	9.19e-06	0.000132	0.612	-1.63	42.7	69.8
SYNE3	71.6	9.19e-06	0.000132	1.82	1.82	9.16	5.03
SNHG4	21.4	9.23e-06	0.000132	0.46	-2.17	1.17	2.53
SCARB2	2790	9.25e-06	0.000132	1.75	1.75	254	145
ADGRG6	49.3	9.45e-06	0.000135	1.85	1.85	3.84	2.08
RPS7	12400	9.5e-06	0.000135	0.62	-1.61	782	1260
RRP1	278	9.53e-06	0.000136	0.625	-1.6	20.8	33.4
TARBP1	264	9.62e-06	0.000137	0.62	-1.61	16.2	26.2
SLC22A17	455	9.73e-06	0.000138	1.79	1.79	49.2	27.6
ZNF423	370	9.74e-06	0.000138	1.68	1.68	32	19.1
CD320	208	9.78e-06	0.000139	0.578	-1.73	15.7	27.2
KIAA1462	85.3	9.8e-06	0.000139	0.575	-1.74	4.5	7.84
RPL7	10400	9.89e-06	0.00014	0.649	-1.54	659	1010
MEIS1-AS2	93.6	9.89e-06	0.00014	1.87	1.87	9.72	5.2
GPAT4	1230	9.9e-06	0.00014	1.65	1.65	114	69.3
TOM1L2	146	9.93e-06	0.00014	1.73	1.73	14.5	8.4
MTERF3	166	9.95e-06	0.00014	0.627	-1.59	13.4	21.4
ZFP90	615	9.99e-06	0.00014	1.59	1.59	61.3	38.5
NPW	24.5	1e-05	0.00014	0.363	-2.75	1.48	4.08
LRRC58	585	1e-05	0.00014	0.637	-1.57	44.2	69.4
PDE2A	429	1e-05	0.00014	1.67	1.67	57.2	34.3
EFR3B	444	1.01e-05	0.000142	1.65	1.65	48	29.1
GNL3L	566	1.01e-05	0.000142	0.64	-1.56	39.1	61
GFRA2	1660	1.02e-05	0.000142	1.73	1.73	273	158
RSL1D1	1740	1.02e-05	0.000142	0.617	-1.62	123	199
POLQ	224	1.03e-05	0.000143	0.644	-1.55	19.1	29.6
RPL7A	12500	1.03e-05	0.000143	0.653	-1.53	778	1190
GDPD5	56.8	1.03e-05	0.000143	1.87	1.87	4.01	2.14
TMEM151A	31.1	1.03e-05	0.000143	1.99	1.99	3.17	1.59
SMIM18	59.7	1.04e-05	0.000144	1.78	1.78	5.14	2.89
RPL34	3520	1.04e-05	0.000144	0.637	-1.57	206	324
NHLRC4	17.1	1.05e-05	0.000145	2.4	2.4	1.31	0.545
CREBRF	114	1.06e-05	0.000146	1.55	1.55	8.73	5.65
EML2	75.9	1.07e-05	0.000148	1.73	1.73	5.13	2.97
SERINC1	3850	1.07e-05	0.000148	1.71	1.71	362	212
KLF10	395	1.08e-05	0.000149	1.64	1.64	39.8	24.2
CRAT	148	1.08e-05	0.000149	1.74	1.74	16.4	9.43
LRRC75B	31.9	1.09e-05	0.00015	1.98	1.98	3.22	1.62
AASS	128	1.09e-05	0.00015	0.625	-1.6	8.84	14.1
MSRB2	117	1.1e-05	0.000151	1.63	1.63	13.4	8.23
RBFOX3	163	1.1e-05	0.000151	1.56	1.56	14.3	9.16
KCNN1	158	1.1e-05	0.000151	1.71	1.71	13.1	7.66
KLHL9	597	1.11e-05	0.000152	1.59	1.59	60.1	37.9
MRRF	206	1.11e-05	0.000152	0.665	-1.5	14.5	21.7
PLD3	967	1.13e-05	0.000154	1.83	1.83	96.4	52.6
COL6A1	849	1.14e-05	0.000156	1.67	1.67	78.6	47.2
ISLR	25.7	1.15e-05	0.000157	2.41	2.41	4.89	2.03
KCNH1	480	1.16e-05	0.000158	1.53	1.53	65.5	42.7
MACROD2	16.3	1.17e-05	0.000158	2.36	2.36	1.87	0.793
BEST1	19.3	1.17e-05	0.000159	2.67	2.67	1.64	0.613
MYH15	17.8	1.17e-05	0.000159	2.34	2.34	2.02	0.865
ANKFN1	90	1.18e-05	0.000159	1.83	1.83	4.73	2.59
CLIP3	156	1.18e-05	0.000159	2.6	2.6	12.4	4.77
ST7	253	1.18e-05	0.000159	1.67	1.67	23.2	13.8
NOL4L	189	1.2e-05	0.000161	1.83	1.83	13.2	7.23
TCEAL7	398	1.2e-05	0.000161	1.54	1.54	34.6	22.5
2023-03-04	47.2	1.2e-05	0.000161	2.3	2.3	6.61	2.88
CCDC58	129	1.2e-05	0.000161	0.643	-1.56	9.78	15.2
PTX3	157	1.2e-05	0.000161	0.574	-1.74	7.38	12.8
LINC02210-CRHR1	27.5	1.2e-05	0.000161	3.07	3.07	3.23	1.05
SPRED3	26.9	1.2e-05	0.000162	2.21	2.21	1.74	0.786
ZNF555	229	1.21e-05	0.000162	1.52	1.52	22.6	14.9
RIMBP2	153	1.22e-05	0.000163	1.57	1.57	18.8	12
KLC1	921	1.22e-05	0.000163	1.65	1.65	90.4	54.7
NCAM2	43	1.24e-05	0.000165	2.2	2.2	4.88	2.22
EPHA2	21.4	1.24e-05	0.000166	0.304	-3.29	1.02	3.35
YPEL1	179	1.25e-05	0.000167	1.57	1.57	17.5	11.2
CEP152	254	1.26e-05	0.000168	0.642	-1.56	20.9	32.6
TPTE2P1	37.2	1.26e-05	0.000168	1.92	1.92	3	1.56
ATP6V0A1	755	1.26e-05	0.000168	1.6	1.6	65.4	40.9
RRP1B	1180	1.27e-05	0.000169	0.621	-1.61	83.7	135
PALD1	207	1.27e-05	0.000169	0.634	-1.58	14.4	22.7
GPR153	52.9	1.3e-05	0.000172	1.94	1.94	4.5	2.32
DKK1	196	1.31e-05	0.000173	2.07	2.07	37.3	18.1
BAK1	119	1.31e-05	0.000173	0.61	-1.64	9.43	15.5
TEAD4	109	1.31e-05	0.000173	0.569	-1.76	8.87	15.6
TRANK1	121	1.32e-05	0.000174	0.572	-1.75	2.67	4.67
TMEM38B	105	1.33e-05	0.000175	0.619	-1.62	8.1	13.1
SPOCK2	124	1.36e-05	0.000179	1.73	1.73	3.69	2.13
NUFIP1	169	1.36e-05	0.000179	0.645	-1.55	13.2	20.5
SMPD3	352	1.36e-05	0.000179	1.61	1.61	28.8	17.9
GRPEL1	295	1.37e-05	0.00018	0.625	-1.6	22.6	36.1
RHOU	1290	1.38e-05	0.000181	1.65	1.65	125	75.7
RREB1	92	1.38e-05	0.000181	0.526	-1.9	8.14	15.5
GRK5	202	1.38e-05	0.000181	1.67	1.67	18.6	11.1
SLC26A11	98.1	1.39e-05	0.000181	1.69	1.69	10.3	6.13
ANKS1B	132	1.4e-05	0.000182	1.55	1.55	10	6.47
ADAMTS7	236	1.4e-05	0.000183	1.55	1.55	20.3	13.1
SHMT2	1240	1.41e-05	0.000183	0.582	-1.72	87.9	151
IGSF1	103	1.42e-05	0.000184	1.61	1.61	14	8.7
MRPS23	826	1.42e-05	0.000185	0.664	-1.51	62.5	94.2
SLC27A2	18	1.43e-05	0.000186	0.382	-2.62	0.696	1.82
DNAJA3	351	1.43e-05	0.000186	0.623	-1.6	27.1	43.4
PHOX2A	681	1.44e-05	0.000187	1.69	1.69	115	68.5
EPHB6	35.2	1.46e-05	0.000188	2.33	2.33	4.13	1.78
RTL8C	416	1.46e-05	0.000189	1.72	1.72	46	26.7
WDR12	445	1.47e-05	0.00019	0.617	-1.62	31	50.2
POLR1B	602	1.48e-05	0.000191	0.592	-1.69	44	74.3
GPR26	109	1.48e-05	0.000191	0.621	-1.61	7.76	12.5
KIDINS220	2430	1.48e-05	0.000191	1.59	1.59	219	137
WSCD1	79.2	1.49e-05	0.000191	0.453	-2.21	4.32	9.54
NRXN2	92.4	1.49e-05	0.000191	1.76	1.76	8.54	4.86
SLC7A14	544	1.51e-05	0.000193	1.67	1.67	64.8	38.8
XRCC3	166	1.53e-05	0.000196	0.653	-1.53	14.7	22.5
RUNDC3A	575	1.53e-05	0.000196	1.6	1.6	68.1	42.6
CLEC2D	39.3	1.53e-05	0.000196	0.57	-1.75	2.57	4.5
SEZ6	206	1.55e-05	0.000199	1.69	1.69	36.2	21.4
FAM208B	1130	1.56e-05	0.000199	0.642	-1.56	83.3	130
TRIT1	78.5	1.56e-05	0.000199	0.635	-1.58	5.07	7.98
H1F0	176	1.56e-05	0.000199	1.64	1.64	20.2	12.3
CDCA7	337	1.58e-05	0.000201	0.662	-1.51	32.4	48.9
RTN4	2980	1.58e-05	0.000201	1.6	1.6	303	189
PRRT2	86.1	1.58e-05	0.000201	1.84	1.84	8.16	4.44
ITM2B	836	1.6e-05	0.000203	1.6	1.6	113	70.5
C1QL3	73	1.6e-05	0.000203	1.71	1.71	12.4	7.25
LTV1	358	1.61e-05	0.000204	0.646	-1.55	28.2	43.7
UACA	51.5	1.61e-05	0.000204	0.561	-1.78	3.9	6.95
OPN3	88.3	1.61e-05	0.000204	1.62	1.62	12.9	7.95
ZNF836	100	1.62e-05	0.000205	1.64	1.64	9.78	5.98
SLC39A14	478	1.62e-05	0.000205	0.621	-1.61	37.8	60.9
C16orf45	313	1.63e-05	0.000205	1.58	1.58	27.4	17.3
CYTH3	365	1.64e-05	0.000207	1.6	1.6	50.1	31.3
APBB3	105	1.65e-05	0.000207	1.64	1.64	9.21	5.61
UNG	797	1.65e-05	0.000208	0.631	-1.58	69.3	110
TMEM5	123	1.67e-05	0.00021	0.637	-1.57	10.1	15.9
POLD4	30.3	1.68e-05	0.000211	2.01	2.01	2.81	1.4
SRRM3	173	1.68e-05	0.000211	1.55	1.55	18.7	12.1
LBH	100	1.68e-05	0.000211	1.73	1.73	5.45	3.15
ESF1	363	1.7e-05	0.000213	0.64	-1.56	26	40.7
MALAT1	12900	1.71e-05	0.000214	1.76	1.76	1010	577
SYPL1	91.2	1.73e-05	0.000215	0.615	-1.63	7.96	12.9
QPCTL	29.6	1.73e-05	0.000216	0.502	-1.99	2.17	4.32
ANGEL1	126	1.74e-05	0.000217	0.615	-1.63	9.09	14.8
PKP4	283	1.76e-05	0.000219	0.611	-1.64	24.4	39.8
TENM4	621	1.76e-05	0.000219	1.78	1.78	79	44.4
TIMM8A	92.6	1.8e-05	0.000223	0.647	-1.55	7.06	10.9
LPCAT3	139	1.84e-05	0.000227	1.56	1.56	15.9	10.2
LINC00654	106	1.84e-05	0.000227	1.68	1.68	10.5	6.24
TTL	1350	1.84e-05	0.000227	1.6	1.6	146	91.5
FAM89B	338	1.84e-05	0.000227	1.69	1.69	33.1	19.6
MIEF2	61.4	1.84e-05	0.000228	1.77	1.77	6.48	3.66
RPS10	6700	1.85e-05	0.000228	0.653	-1.53	440	675
DUXAP8	141	1.85e-05	0.000228	0.608	-1.64	9.17	15.1
JAKMIP3	23	1.85e-05	0.000228	2.13	2.13	1.79	0.84
ABTB1	17.1	1.85e-05	0.000228	2.38	2.38	1.73	0.728
IMP4	398	1.87e-05	0.00023	0.628	-1.59	29.7	47.3
DHX34	177	1.88e-05	0.000231	0.652	-1.53	12.4	19
JAM3	784	1.89e-05	0.000232	0.631	-1.58	63.9	101
MTHFD2	2850	1.91e-05	0.000234	0.656	-1.53	209	319
LINC01296	288	1.91e-05	0.000234	0.655	-1.53	19.4	29.6
CLN6	442	1.92e-05	0.000235	0.607	-1.65	35	57.7
MPPED2	153	1.92e-05	0.000235	1.71	1.71	10.4	6.04
PSMG4	45.3	1.96e-05	0.000239	0.573	-1.75	3.1	5.4
SH3BGRL3	125	1.96e-05	0.000239	1.82	1.82	12.3	6.77
MTMR7	81.3	1.99e-05	0.000243	1.64	1.64	6.61	4.03
GTF3A	737	2.01e-05	0.000245	0.656	-1.52	60.2	91.8
SLITRK4	32.8	2.02e-05	0.000245	0.525	-1.9	2.16	4.11
MEIS3	851	2.02e-05	0.000246	1.61	1.61	89	55.1
EFNB3	137	2.03e-05	0.000246	1.76	1.76	14.4	8.22
USP32P1	61.4	2.03e-05	0.000247	0.555	-1.8	3.11	5.61
ADK	176	2.04e-05	0.000247	0.663	-1.51	14.5	21.8
KIFAP3	485	2.04e-05	0.000247	1.58	1.58	50.6	32
BCCIP	626	2.05e-05	0.000248	0.642	-1.56	48	74.7
SEMA6B	123	2.07e-05	0.00025	0.589	-1.7	5.87	9.96
CCNDBP1	381	2.07e-05	0.00025	1.56	1.56	37.4	24
PCMTD1	277	2.07e-05	0.00025	1.51	1.51	24	15.9
SNRPB	1900	2.07e-05	0.00025	0.636	-1.57	154	243
TUBA1C	130	2.1e-05	0.000253	1.57	1.57	13.4	8.58
ST8SIA4	74.5	2.12e-05	0.000255	1.7	1.7	6.5	3.83
CEP290	316	2.14e-05	0.000257	0.649	-1.54	24	36.9
AGPAT4	579	2.14e-05	0.000257	1.54	1.54	44.6	29
DDX51	165	2.15e-05	0.000257	0.643	-1.55	12.5	19.5
CCDC3	595	2.16e-05	0.000258	1.68	1.68	99.2	59.1
MAP3K14-AS1	14.1	2.16e-05	0.000258	2.4	2.4	1.22	0.509
TP53INP2	121	2.17e-05	0.00026	2.26	2.26	10.1	4.45
FCHO1	63.3	2.18e-05	0.00026	1.72	1.72	5.59	3.25
GPRC5B	25	2.19e-05	0.000261	0.495	-2.02	1.41	2.84
POLR1C	163	2.19e-05	0.000261	0.631	-1.58	12.3	19.5
TMEM178B	376	2.21e-05	0.000263	1.63	1.63	35	21.5
ZNF425	51.5	2.21e-05	0.000263	1.82	1.82	4.81	2.65
HSD11B1L	45.5	2.24e-05	0.000266	1.81	1.81	4.54	2.5
XPNPEP3	190	2.25e-05	0.000267	0.653	-1.53	13.8	21.1
ABCB6	237	2.26e-05	0.000268	0.639	-1.57	20	31.4
ADSSL1	16.5	2.32e-05	0.000275	2.24	2.24	1.8	0.807
FAM20C	255	2.35e-05	0.000278	1.69	1.69	24.9	14.7
IGDCC4	84	2.36e-05	0.000278	0.615	-1.63	4.92	8.01
RPS3	10000	2.38e-05	0.00028	0.66	-1.51	618	936
FHOD1	58.5	2.41e-05	0.000283	0.589	-1.7	4.29	7.29
KIAA1841	175	2.41e-05	0.000283	1.52	1.52	18.8	12.4
PCDHGA4	26.4	2.41e-05	0.000283	2	2	2.48	1.24
RIN1	18.3	2.43e-05	0.000286	0.393	-2.54	1.08	2.74
CENPF	4080	2.44e-05	0.000287	0.638	-1.57	344	539
SYT9	25.9	2.45e-05	0.000287	2.53	2.53	5.17	2.04
CPT1C	391	2.45e-05	0.000287	1.6	1.6	37	23.1
DDR1	526	2.47e-05	0.000289	1.68	1.68	38.8	23.2
SHC4	36.5	2.5e-05	0.000292	1.77	1.77	3.33	1.88
CHRM1	42	2.51e-05	0.000293	2.05	2.05	8.09	3.95
ZDHHC22	75.5	2.51e-05	0.000293	0.587	-1.7	4.14	7.06
EEF1B2	5200	2.53e-05	0.000295	0.665	-1.5	372	559
BZW2	958	2.54e-05	0.000296	0.644	-1.55	71.2	111
TXLNGY	82.8	2.55e-05	0.000297	0.571	-1.75	5.41	9.47
ARL8A	289	2.57e-05	0.000299	1.62	1.62	29.6	18.3
KLF9	47.2	2.59e-05	0.000301	0.554	-1.8	3.06	5.52
RPS8	5220	2.6e-05	0.000302	0.663	-1.51	343	517
PPA1	1780	2.64e-05	0.000306	0.657	-1.52	118	179
CBX4	183	2.64e-05	0.000306	1.63	1.63	16.9	10.4
WBP1L	174	2.67e-05	0.000309	1.62	1.62	17	10.5
RCL1	249	2.68e-05	0.00031	0.655	-1.53	18.1	27.6
AIMP2	295	2.71e-05	0.000313	0.648	-1.54	24.3	37.4
RASL10B	249	2.71e-05	0.000313	0.605	-1.65	20.3	33.5
WDR74	320	2.72e-05	0.000314	0.636	-1.57	24.1	37.9
FKBP10	359	2.77e-05	0.000319	0.617	-1.62	28.3	45.8
RAB39B	192	2.8e-05	0.000322	1.58	1.58	18.5	11.8
LYST	281	2.8e-05	0.000322	1.52	1.52	22	14.5
TBX2	884	2.82e-05	0.000324	1.64	1.64	107	65.1
MAP7D3	158	2.82e-05	0.000324	0.652	-1.53	12.3	18.9
ATP6V0E2	457	2.83e-05	0.000324	1.56	1.56	43.3	27.8
ATP2B4	550	2.85e-05	0.000326	1.74	1.74	61.5	35.3
PPP2R2B	81.5	2.88e-05	0.000329	1.62	1.62	7.71	4.75
GNAZ	237	2.9e-05	0.000331	1.63	1.63	24	14.7
PHB	3040	2.91e-05	0.000331	0.649	-1.54	244	376
CENPK	117	2.93e-05	0.000334	0.66	-1.52	9.96	15.1
IRGQ	1240	2.98e-05	0.000339	1.65	1.65	114	69.4
FARSB	465	3e-05	0.000341	0.663	-1.51	37.8	57
SHC1	1110	3.03e-05	0.000344	1.6	1.6	75.9	47.5
LZTS1	1280	3.04e-05	0.000344	1.62	1.62	102	62.7
RRP7BP	75.7	3.04e-05	0.000344	0.584	-1.71	4.97	8.5
SPON2	36	3.06e-05	0.000347	2.13	2.13	2.75	1.29
SMPD1	72.5	3.07e-05	0.000347	1.72	1.72	7.28	4.23
PLPP7	58.6	3.07e-05	0.000347	1.72	1.72	5.41	3.15
TFRC	2470	3.08e-05	0.000347	0.619	-1.62	182	295
SLC35F2	164	3.11e-05	0.000351	0.63	-1.59	13.1	20.7
SHD	850	3.14e-05	0.000354	1.6	1.6	102	63.9
GTF2H2	133	3.15e-05	0.000355	0.658	-1.52	10.7	16.3
HNRNPA1P10	1330	3.16e-05	0.000356	0.602	-1.66	94.8	157
PLPPR4	345	3.17e-05	0.000357	1.55	1.55	48.1	31.1
KLHDC8A	180	3.18e-05	0.000357	1.6	1.6	16.2	10.1
MIAT	667	3.18e-05	0.000357	1.68	1.68	30.3	18
URB1	592	3.2e-05	0.000358	0.658	-1.52	45.4	69
MAGI2	71.3	3.23e-05	0.000362	1.69	1.69	7.88	4.68
MRPL3	931	3.24e-05	0.000362	0.656	-1.52	70.5	108
LGALS3	33.8	3.25e-05	0.000363	1.83	1.83	3.66	2
NFS1	61.6	3.27e-05	0.000365	0.607	-1.65	4.44	7.32
BAZ1A	920	3.27e-05	0.000365	0.651	-1.54	67	103
ZSWIM5	70.8	3.28e-05	0.000365	1.66	1.66	6.9	4.16
EIF5A	2570	3.28e-05	0.000365	0.638	-1.57	200	314
PES1	807	3.28e-05	0.000365	0.634	-1.58	59.9	94.5
PARP9	142	3.29e-05	0.000366	1.73	1.73	19.7	11.4
AK1	288	3.32e-05	0.000369	1.56	1.56	28.1	18
TTYH2	214	3.33e-05	0.000369	0.631	-1.58	12.3	19.4
GTF2H2B	195	3.36e-05	0.000372	0.664	-1.51	14.5	21.8
FLRT3	214	3.36e-05	0.000373	1.55	1.55	38.5	24.8
NRM	138	3.39e-05	0.000375	1.62	1.62	18.3	11.3
ARHGEF10	148	3.43e-05	0.000379	0.66	-1.51	11.3	17.1
COLGALT2	40.4	3.45e-05	0.000381	0.548	-1.82	2.88	5.26
LINC00693	33.5	3.47e-05	0.000382	1.98	1.98	3.35	1.7
PAXBP1	341	3.47e-05	0.000383	0.656	-1.52	23.6	35.9
SVBP	75.6	3.48e-05	0.000383	1.69	1.69	7.37	4.36
INAFM1	35	3.48e-05	0.000383	2.22	2.22	2.83	1.28
CADM4	147	3.49e-05	0.000384	1.63	1.63	13.1	8.02
CRABP1	382	3.5e-05	0.000384	1.68	1.68	49.9	29.7
APLP2	2210	3.51e-05	0.000385	1.52	1.52	174	114
TMX4	782	3.53e-05	0.000386	1.52	1.52	108	70.7
NCAM1	1060	3.54e-05	0.000387	1.75	1.75	129	73.5
RPL41	9210	3.55e-05	0.000388	0.667	-1.5	658	987
DNAJB5	237	3.56e-05	0.000389	1.59	1.59	20.6	12.9
HSPA9	2960	3.64e-05	0.000397	0.622	-1.61	228	366
MRM1	24.8	3.65e-05	0.000398	0.468	-2.14	1.52	3.26
SLC45A3	34.8	3.66e-05	0.000399	0.539	-1.86	2	3.72
LOC100129034	73.4	3.67e-05	0.0004	0.573	-1.74	4.4	7.68
MIF	1850	3.68e-05	0.0004	0.652	-1.53	146	223
FAH	58.9	3.69e-05	0.000401	0.613	-1.63	4.8	7.84
KIF5C	2790	3.71e-05	0.000403	1.6	1.6	236	148
MTHFD1	983	3.72e-05	0.000403	0.642	-1.56	87.1	136
PDF	28.6	3.74e-05	0.000404	0.467	-2.14	1.86	3.98
BACH2	183	3.75e-05	0.000405	1.74	1.74	15.1	8.67
CHEK2	136	3.76e-05	0.000406	0.665	-1.5	12.2	18.3
PRSS35	21.3	3.8e-05	0.00041	0.411	-2.43	0.31	0.755
VGF	109	3.84e-05	0.000414	0.57	-1.75	6.39	11.2
PHKA1	109	3.86e-05	0.000416	0.62	-1.61	9.03	14.6
NUDT11	421	3.89e-05	0.000418	0.646	-1.55	29.7	46
IPO5	3280	3.9e-05	0.000419	0.645	-1.55	257	398
ABCD1	36.7	3.91e-05	0.000419	1.98	1.98	3.59	1.82
LIMK1	298	3.93e-05	0.000421	1.57	1.57	29.3	18.6
PRKY	73.5	3.94e-05	0.000422	0.637	-1.57	4.8	7.53
ULBP1	31.4	3.98e-05	0.000426	0.572	-1.75	1.59	2.78
ROBO2	39.7	3.99e-05	0.000426	1.92	1.92	4.13	2.15
PRKCA	967	3.99e-05	0.000426	1.76	1.76	155	88.2
SYT1	2790	4.01e-05	0.000427	1.64	1.64	304	186
CENPE	453	4.02e-05	0.000429	0.63	-1.59	39.1	62
RRAGB	140	4.04e-05	0.00043	1.62	1.62	14.3	8.83
RCAN3	54.7	4.08e-05	0.000433	1.6	1.6	6.04	3.78
BTG2	199	4.09e-05	0.000434	1.57	1.57	16.7	10.6
ZNF772	529	4.11e-05	0.000436	1.52	1.52	49.9	32.8
NIP7	275	4.12e-05	0.000437	0.651	-1.54	22	33.8
GK	132	4.13e-05	0.000438	0.645	-1.55	11.1	17.1
CD59	529	4.18e-05	0.000442	1.5	1.5	56	37.2
FAM163A	133	4.19e-05	0.000442	1.61	1.61	17.9	11.1
COA7	597	4.19e-05	0.000442	0.652	-1.53	46	70.6
NMB	17.7	4.2e-05	0.000443	0.46	-2.18	1.12	2.43
LRRC4B	163	4.21e-05	0.000444	1.67	1.67	15.1	9.03
ZBTB46	265	4.24e-05	0.000446	1.52	1.52	21.3	14
CALM1	3630	4.24e-05	0.000446	1.57	1.57	343	219
NR2C2AP	83.8	4.27e-05	0.000449	0.611	-1.64	7.01	11.5
LINC01088	48	4.29e-05	0.00045	1.79	1.79	3.85	2.16
PPP1R15A	176	4.3e-05	0.000451	1.56	1.56	13.2	8.45
OAF	16.9	4.32e-05	0.000452	0.369	-2.71	1.05	2.83
MXD1	206	4.32e-05	0.000452	1.63	1.63	15.7	9.63
CAPN5	61	4.33e-05	0.000453	1.76	1.76	6.48	3.68
LINC00476	76.7	4.33e-05	0.000453	1.77	1.77	8.56	4.83
MTMR9	645	4.33e-05	0.000453	1.53	1.53	61.2	40
NCR3LG1	172	4.38e-05	0.000457	0.658	-1.52	14.7	22.3
COQ3	116	4.39e-05	0.000458	0.622	-1.61	8.69	14
VAT1	867	4.45e-05	0.000464	1.69	1.69	75.4	44.6
LOC101927497	118	4.47e-05	0.000465	1.55	1.55	15.6	10.1
KRBA2	106	4.47e-05	0.000465	1.57	1.57	8.7	5.53
TP53I3	305	4.5e-05	0.000468	1.59	1.59	34.1	21.4
PARD6A	40.7	4.55e-05	0.000472	1.86	1.86	3.73	2
MRE11	262	4.55e-05	0.000472	0.66	-1.51	22.4	33.9
TPM1	729	4.57e-05	0.000473	1.5	1.5	77.8	51.8
C2CD2	114	4.63e-05	0.000479	0.651	-1.54	8.17	12.5
ST3GAL3	50	4.64e-05	0.000479	1.72	1.72	6.13	3.57
GABRB2	18.4	4.65e-05	0.000479	0.445	-2.25	1.18	2.66
VAT1L	109	4.65e-05	0.000479	1.68	1.68	13.7	8.13
TCP11L1	291	4.66e-05	0.00048	1.58	1.58	27.8	17.6
LOC100128239	21.1	4.7e-05	0.000484	2.18	2.18	2.04	0.933
DLGAP2	14.5	4.71e-05	0.000484	2.39	2.39	1.66	0.694
ANO4	65	4.74e-05	0.000487	1.7	1.7	7.94	4.68
ZNF699	110	4.78e-05	0.00049	1.55	1.55	11.4	7.38
UBXN8	66.8	4.79e-05	0.000491	0.63	-1.59	4.64	7.36
CXCR4	116	4.81e-05	0.000493	1.75	1.75	16.9	9.62
MAPK8IP3	502	4.82e-05	0.000493	1.54	1.54	45.9	29.7
PIM1	225	4.82e-05	0.000493	1.64	1.64	26.7	16.2
NCKAP5	43.6	4.83e-05	0.000493	0.532	-1.88	1.86	3.5
ASAP3	143	4.92e-05	0.000502	1.61	1.61	15.8	9.82
LGALS3BP	613	4.96e-05	0.000505	1.91	1.91	84.8	44.3
RUVBL1	820	4.96e-05	0.000505	0.66	-1.52	65.7	99.5
LOC100507557	31.3	4.97e-05	0.000505	1.8	1.8	3.2	1.78
B4GALNT1	224	4.98e-05	0.000506	1.5	1.5	24.3	16.2
SNRNP48	148	5.06e-05	0.000513	0.66	-1.51	11.3	17.2
ADGRL1	847	5.06e-05	0.000513	1.58	1.58	84	53.3
PTDSS2	174	5.09e-05	0.000515	0.65	-1.54	12.3	19
HRASLS	45.8	5.11e-05	0.000516	0.602	-1.66	3.19	5.3
LOC100506990	45.6	5.11e-05	0.000516	1.72	1.72	4.32	2.52
TMEM243	59	5.12e-05	0.000517	0.609	-1.64	4.7	7.71
RPL3	12100	5.22e-05	0.000526	0.658	-1.52	776	1180
NKAIN4	165	5.23e-05	0.000527	1.55	1.55	11.1	7.14
IARS	3480	5.25e-05	0.000528	0.649	-1.54	265	408
MYO18A	356	5.32e-05	0.000535	1.53	1.53	31.7	20.7
CACNB1	90.3	5.33e-05	0.000535	1.69	1.69	7.34	4.35
NBPF8	45.6	5.35e-05	0.000537	0.6	-1.67	3.08	5.14
TXLNG	386	5.37e-05	0.000537	0.653	-1.53	29.5	45.2
NCL	5250	5.41e-05	0.000541	0.627	-1.59	403	643
SHISA5	439	5.46e-05	0.000545	1.63	1.63	43	26.3
ATAD3A	107	5.58e-05	0.000555	0.644	-1.55	7.95	12.3
C1QTNF4	31.5	5.61e-05	0.000557	2.03	2.03	3.65	1.8
CPE	1330	5.65e-05	0.000561	1.64	1.64	122	74.2
LINC01829	223	5.67e-05	0.000563	1.51	1.51	19.7	13
SLC8A2	123	5.77e-05	0.000572	1.61	1.61	9.5	5.89
ANXA2P2	51.7	5.83e-05	0.000577	1.65	1.65	6.4	3.88
HSPA4L	140	5.87e-05	0.00058	0.627	-1.59	9	14.3
NHP2	742	5.88e-05	0.00058	0.663	-1.51	56.5	85.2
MAP1LC3B	393	5.96e-05	0.000587	1.58	1.58	24.8	15.8
RNR2	13700	5.96e-05	0.000587	1.74	1.74	1040	596
DOCK10	230	6.01e-05	0.000591	0.655	-1.53	18.6	28.3
ACTL6B	319	6.04e-05	0.000592	1.58	1.58	33.8	21.4
TXNDC5	1050	6.04e-05	0.000592	0.642	-1.56	89.7	140
CASP3	626	6.06e-05	0.000593	1.63	1.63	37.1	22.8
CCDC181	51.3	6.1e-05	0.000596	0.608	-1.65	3.48	5.73
PROKR1	92.9	6.12e-05	0.000598	1.72	1.72	12.6	7.3
MVB12B	416	6.15e-05	0.000599	1.53	1.53	38.7	25.2
WLS	483	6.15e-05	0.000599	0.642	-1.56	42.7	66.5
BAMBI	94.6	6.15e-05	0.000599	1.55	1.55	11.6	7.5
PROK2	14.6	6.24e-05	0.000607	0.407	-2.46	0.832	2.05
DDIT3	82.2	6.32e-05	0.000614	1.57	1.57	4.45	2.84
GABARAP	1320	6.34e-05	0.000615	1.52	1.52	117	76.7
PCAT7	32	6.37e-05	0.000617	1.79	1.79	3.62	2.02
PLCB4	144	6.38e-05	0.000618	1.66	1.66	18.8	11.3
CDS2	815	6.39e-05	0.000618	1.53	1.53	78.7	51.6
EBNA1BP2	202	6.46e-05	0.000624	0.633	-1.58	16.8	26.6
RGS17	47.1	6.47e-05	0.000624	1.64	1.64	5.1	3.1
NAGK	94.9	6.48e-05	0.000624	1.58	1.58	10.7	6.74
SUN2	436	6.52e-05	0.000628	1.54	1.54	44.1	28.6
CDK5R2	48.5	6.56e-05	0.000631	1.94	1.94	4.57	2.35
ZBTB4	120	6.56e-05	0.000631	1.57	1.57	11.2	7.12
HSPA1B	1600	6.67e-05	0.000641	0.63	-1.59	117	186
GPX8	39.5	6.73e-05	0.000646	0.54	-1.85	2.95	5.46
HADH	332	6.79e-05	0.000652	0.666	-1.5	28.8	43.3
ATL1	298	6.82e-05	0.000654	1.5	1.5	33.3	22.2
CLDN4	14.9	6.86e-05	0.000657	2.35	2.35	1.06	0.449
PDIA5	56.7	6.9e-05	0.000661	0.6	-1.67	3.57	5.96
RASSF4	19.7	6.92e-05	0.000662	2.25	2.25	1.9	0.841
S100A6	92.2	6.92e-05	0.000662	1.58	1.58	10.7	6.73
ARHGAP33	47.3	6.94e-05	0.000663	1.66	1.66	4.36	2.63
C14orf144	133	6.99e-05	0.000666	1.61	1.61	12.7	7.89
SLIT2	86	6.99e-05	0.000667	1.58	1.58	9.85	6.25
WDR3	1170	7.05e-05	0.000671	0.649	-1.54	86.3	133
SYP	1320	7.15e-05	0.00068	1.65	1.65	118	71.5
ARMC6	426	7.19e-05	0.000683	0.651	-1.54	32.7	50.2
ALG3	200	7.2e-05	0.000683	0.639	-1.56	14.1	22.1
SLC16A10	71.3	7.2e-05	0.000683	0.604	-1.66	5.25	8.71
TYW3	288	7.2e-05	0.000683	0.638	-1.57	23.1	36.2
SOX11	5770	7.24e-05	0.000686	1.52	1.52	453	297
NEFH	563	7.25e-05	0.000687	0.665	-1.5	44.6	67.1
ZNF34	71	7.26e-05	0.000687	1.64	1.64	7.54	4.61
CCND1	3980	7.33e-05	0.000693	1.52	1.52	463	304
MCCC2	251	7.35e-05	0.000694	0.603	-1.66	17.8	29.5
HS6ST2	187	7.35e-05	0.000694	0.643	-1.56	10.5	16.4
SNX15	152	7.44e-05	0.000702	1.64	1.64	18	11
ADAMTS14	62.1	7.47e-05	0.000704	0.634	-1.58	3.24	5.12
ZFAND3	291	7.5e-05	0.000705	1.55	1.55	28.7	18.5
ACY1	56	7.5e-05	0.000705	0.588	-1.7	4.23	7.19
C7orf13	29.4	7.51e-05	0.000705	1.87	1.87	2.55	1.36
IKBKB	102	7.54e-05	0.000708	0.661	-1.51	7.78	11.8
TSPAN17	245	7.64e-05	0.000715	1.54	1.54	24.3	15.8
CASTOR2	863	7.69e-05	0.000717	1.54	1.54	79.2	51.4
DNPEP	175	7.74e-05	0.00072	0.659	-1.52	13	19.7
LOXL1	978	7.85e-05	0.000729	1.56	1.56	102	65.6
EEF1E1	118	7.86e-05	0.00073	0.664	-1.51	9.02	13.6
XPO5	1400	7.91e-05	0.000734	0.665	-1.5	106	159
CDON	243	7.95e-05	0.000737	0.616	-1.62	26.3	42.7
LSAMP	1110	7.98e-05	0.00074	1.5	1.5	127	84.6
LTBP2	38.5	8.15e-05	0.000754	1.64	1.64	4.12	2.51
C11orf95	780	8.25e-05	0.000761	1.52	1.52	63.2	41.4
IQGAP2	20.3	8.37e-05	0.000772	0.457	-2.19	1.24	2.7
B3GNT9	45	8.39e-05	0.000773	1.74	1.74	5.32	3.05
TMEM255A	32.6	8.43e-05	0.000776	1.94	1.94	3.69	1.91
MITF	34.3	8.45e-05	0.000777	0.557	-1.79	2.28	4.08
NFKB1	78.3	8.45e-05	0.000777	0.567	-1.76	6.26	11
DCTN1	3490	8.48e-05	0.000778	1.51	1.51	325	215
STAG3	14.6	8.66e-05	0.000794	0.462	-2.16	0.933	2.02
PCDHB7	13.3	8.68e-05	0.000794	2.45	2.45	1.68	0.683
2023-09-04	34.8	8.7e-05	0.000796	1.86	1.86	3.24	1.74
LRIG1	92.3	8.72e-05	0.000796	0.655	-1.53	6.2	9.46
LOC100419583	259	8.74e-05	0.000798	1.51	1.51	26.7	17.7
PAK5	68.5	8.76e-05	0.000798	1.59	1.59	4.38	2.76
TOMM40	465	8.79e-05	0.000801	0.664	-1.51	38	57.2
AHCY	2330	8.91e-05	0.000809	0.646	-1.55	174	270
CCKAR	169	8.99e-05	0.000816	0.581	-1.72	17.3	29.9
PACSIN3	56.4	9.1e-05	0.000825	0.599	-1.67	5.05	8.44
DCTPP1	332	9.13e-05	0.000826	0.658	-1.52	28	42.5
APBB1	735	9.13e-05	0.000826	1.54	1.54	71.2	46.1
SGSH	80.6	9.21e-05	0.000833	1.52	1.52	8.22	5.41
FLOT2	290	9.29e-05	0.000838	1.51	1.51	30.1	19.9
SLC25A25-AS1	37.6	9.65e-05	0.000869	0.582	-1.72	1.98	3.4
ANXA2	4490	9.71e-05	0.000873	1.53	1.53	532	348
FASTKD3	135	9.81e-05	0.000881	0.664	-1.51	10.7	16
PIK3AP1	29.3	9.85e-05	0.000884	0.511	-1.96	1.51	2.95
RNF19A	329	9.89e-05	0.000887	1.53	1.53	34	22.2
MPP3	204	9.9e-05	0.000887	1.59	1.59	22	13.9
DDX54	483	9.91e-05	0.000887	0.615	-1.63	37.5	61
RABEPK	616	9.95e-05	0.00089	0.659	-1.52	43.8	66.5
SSB	840	9.97e-05	0.000891	0.657	-1.52	64.4	98.1
FAM19A4	14.7	9.98e-05	0.000892	0.41	-2.44	0.641	1.56
LINC00963	41.9	0.0001	0.000893	1.69	1.69	3.27	1.93
CHGB	664	0.0001	0.000894	1.57	1.57	60.1	38.3
KCNJ6	65.1	0.0001	0.000894	1.76	1.76	1.29	0.732
P2RX5	30.8	0.000102	0.000903	0.518	-1.93	2.1	4.06
GALNT12	22.7	0.000102	0.000907	0.517	-1.93	1.53	2.97
MAN1A1	201	0.000103	0.000916	1.65	1.65	30	18.2
SFXN2	41.7	0.000104	0.000916	0.603	-1.66	3.33	5.52
GADD45G	114	0.000104	0.000919	1.59	1.59	10.4	6.55
ARHGEF28	30	0.000105	0.000923	2.41	2.41	6.42	2.67
FZD8	97.9	0.000105	0.000923	0.608	-1.65	7.44	12.2
FAM167A	92.2	0.000106	0.000936	1.79	1.79	15	8.37
ALG8	281	0.000106	0.000936	0.661	-1.51	22.3	33.7
EVI5L	136	0.000108	0.000949	1.58	1.58	14	8.84
LOH12CR2	15.7	0.000109	0.000955	2.09	2.09	1.62	0.774
KATNB1	380	0.00011	0.000961	0.66	-1.52	26.4	40
FAM86EP	18.3	0.000111	0.000969	0.503	-1.99	1.23	2.45
FGFR1	370	0.000114	0.000989	1.52	1.52	49.5	32.5
TMEM63B	231	0.000115	0.000994	1.61	1.61	19.5	12.1
RPS14P3	33	0.000115	0.000996	0.534	-1.87	1.86	3.49
SULF2	443	0.000116	0.001	0.508	-1.97	42.6	84
USP18	18.7	0.000117	0.001	0.493	-2.03	1.31	2.65
ZDHHC11	22.8	0.000118	0.00101	0.489	-2.05	0.995	2.03
GRIN1	66.8	0.000118	0.00101	1.59	1.59	4.9	3.09
JUND	423	0.000118	0.00101	1.55	1.55	39.4	25.4
MAP1LC3A	14.3	0.000119	0.00102	2.5	2.5	1.28	0.511
TSPAN18	844	0.000119	0.00102	1.51	1.51	78.9	52.2
MAP2	1360	0.000119	0.00102	1.54	1.54	131	84.6
TOX2	41.9	0.00012	0.00102	1.7	1.7	4.37	2.57
TYSND1	114	0.00012	0.00102	0.634	-1.58	8.73	13.8
DNAJC4	67	0.000123	0.00105	1.63	1.63	6.29	3.85
AGTRAP	29.3	0.000125	0.00106	0.508	-1.97	2.04	4.02
PBLD	38.6	0.000127	0.00108	1.65	1.65	3.8	2.3
MYO1E	40.1	0.000129	0.00109	0.593	-1.69	2.25	3.79
HRH3	74.1	0.000129	0.00109	0.628	-1.59	4.68	7.45
CAMK2N1	39.2	0.000129	0.00109	1.76	1.76	2.66	1.51
SHMT1	120	0.000129	0.00109	0.663	-1.51	10.8	16.3
ZSWIM4	182	0.000129	0.00109	1.64	1.64	13.1	7.99
LINC00294	207	0.000131	0.00111	1.58	1.58	18.8	11.9
IRF9	24.2	0.000131	0.00111	1.82	1.82	2.89	1.58
TEX19	29.9	0.000133	0.00112	0.513	-1.95	1.99	3.88
SLC29A4	1280	0.000133	0.00112	1.54	1.54	140	90.7
GAL	722	0.000135	0.00113	1.58	1.58	93	58.9
EPB41L1	188	0.000137	0.00115	1.65	1.65	17.4	10.6
SCRT1	86.1	0.000139	0.00116	1.55	1.55	6.24	4.03
LOXL4	270	0.000142	0.00118	1.56	1.56	23.6	15.2
CUTC	89	0.000142	0.00118	0.644	-1.55	6.78	10.5
SLC1A4	412	0.000144	0.0012	1.54	1.54	50.4	32.7
ARHGEF2	1840	0.000144	0.0012	1.53	1.53	160	105
PGF	502	0.000144	0.0012	1.57	1.57	53	33.7
SLC1A5	533	0.000144	0.0012	0.603	-1.66	42.7	70.8
AGAP6	41.9	0.000149	0.00123	0.602	-1.66	2.65	4.4
PAX5	169	0.000149	0.00123	0.644	-1.55	12.9	20
EEF1G	17500	0.00015	0.00123	0.661	-1.51	1190	1790
KLC4	129	0.000152	0.00125	1.56	1.56	12.5	8.01
DDC	358	0.000153	0.00125	1.66	1.66	35.9	21.7
ITPRIPL2	584	0.000155	0.00127	1.58	1.58	57.8	36.6
CPEB3	58	0.000156	0.00127	1.59	1.59	4.43	2.79
METAP1D	38.7	0.000157	0.00128	0.598	-1.67	2.63	4.4
PDP2	204	0.000158	0.00128	0.648	-1.54	14.1	21.7
DUSP16	407	0.000158	0.00128	1.55	1.55	38.1	24.5
MPZ	17.8	0.00016	0.0013	2	2	2.08	1.04
UBE2L6	213	0.000161	0.00131	1.52	1.52	19.6	12.9
RAB30	1060	0.000162	0.00132	1.53	1.53	91.3	59.7
GRASP	98.6	0.000163	0.00132	1.65	1.65	4.66	2.83
NUDT18	17.1	0.000165	0.00133	2.1	2.1	1.67	0.795
TLX3	34.2	0.000166	0.00134	1.88	1.88	3.45	1.84
MOAP1	473	0.000169	0.00136	1.55	1.55	46.8	30.2
ABLIM1	698	0.000169	0.00136	0.656	-1.52	51.5	78.5
PRCD	16.6	0.00017	0.00136	2.01	2.01	1.88	0.939
PLEKHG5	42.4	0.00017	0.00137	1.59	1.59	3.89	2.44
MND1	62.3	0.000171	0.00137	0.646	-1.55	5.66	8.76
HSD11B2	30.7	0.000171	0.00137	0.522	-1.92	0.684	1.31
RTL1	60.2	0.000174	0.00139	1.78	1.78	2.46	1.39
DFNA5	129	0.000176	0.0014	1.58	1.58	13.3	8.39
ADCY2	59.1	0.000181	0.00144	1.72	1.72	6.03	3.51
PYCR1	1020	0.000181	0.00144	0.661	-1.51	78.3	118
GLI3	73.8	0.000184	0.00145	0.485	-2.06	5.31	11
PRKCH	50.2	0.000184	0.00146	1.6	1.6	6.58	4.11
SMIM4	38	0.000188	0.00148	0.619	-1.61	2.73	4.41
SLC2A13	38.6	0.000188	0.00148	0.571	-1.75	2.98	5.21
LOC284581	38.1	0.000189	0.00149	0.632	-1.58	2.4	3.79
CPEB2	43.6	0.000191	0.0015	1.83	1.83	2.19	1.2
CORO2A	122	0.000193	0.00151	1.57	1.57	12.9	8.19
CEBPB	33.3	0.000195	0.00152	0.612	-1.63	2.18	3.57
PCDH18	60.4	0.000195	0.00153	0.597	-1.68	4.55	7.63
PLPPR2	191	0.000196	0.00153	1.51	1.51	17.3	11.4
SNORA74A	41.2	0.000198	0.00155	0.551	-1.81	2.3	4.17
FKBP4	3140	0.000198	0.00155	0.662	-1.51	253	383
SCN2A	23.8	0.000199	0.00155	1.84	1.84	2.28	1.24
SIK1	94.8	0.000199	0.00155	0.661	-1.51	3.19	4.83
ATXN1	148	0.000201	0.00156	1.57	1.57	20	12.7
GRIN3A	37.7	0.000201	0.00157	1.71	1.71	4.74	2.77
PER1	114	0.000202	0.00157	0.639	-1.56	6.88	10.8
RGS3	203	0.000203	0.00158	1.52	1.52	17.4	11.5
FSTL4	338	0.000204	0.00158	1.54	1.54	19.1	12.4
DISP2	233	0.000207	0.0016	1.53	1.53	22.9	15
SPTBN4	138	0.000208	0.0016	1.53	1.53	11.4	7.43
AFF3	457	0.000208	0.0016	1.55	1.55	49.8	32.1
JAK3	39.6	0.000217	0.00166	1.78	1.78	4.27	2.4
RBM24	16.5	0.000217	0.00166	2.11	2.11	2.21	1.05
TGIF1	106	0.000217	0.00166	0.663	-1.51	9.38	14.2
SYN1	120	0.00022	0.00168	1.84	1.84	10.9	5.93
ZNF485	55.3	0.000222	0.00169	0.639	-1.56	4.06	6.35
ZER1	253	0.000223	0.0017	1.5	1.5	24.1	16
SYNJ2	92.2	0.000224	0.00171	0.642	-1.56	7.84	12.2
SECTM1	45.7	0.000225	0.00171	1.77	1.77	4.04	2.29
RPS6KA2	615	0.000227	0.00172	1.56	1.56	52.8	33.8
BYSL	276	0.000227	0.00173	0.663	-1.51	20.5	30.9
GALM	42.2	0.000229	0.00173	0.617	-1.62	3.62	5.87
ADCYAP1	69.4	0.000232	0.00176	1.55	1.55	8.39	5.4
NME1-NME2	166	0.000232	0.00176	0.647	-1.55	12.8	19.7
SNHG25	24.8	0.000233	0.00176	0.502	-1.99	1.51	3
HMBS	52.2	0.000236	0.00178	0.656	-1.52	4.29	6.54
PCDHGB7	60.7	0.000236	0.00178	1.61	1.61	6.1	3.79
ZNF750	18.2	0.000239	0.0018	2	2	1.3	0.649
L3HYPDH	41.9	0.000239	0.0018	0.608	-1.65	2.64	4.35
PTER	75.4	0.00024	0.0018	1.55	1.55	12.4	8
ABCG4	14	0.000241	0.00181	2.07	2.07	1.38	0.665
CHN2	89.2	0.000241	0.00181	1.53	1.53	12.7	8.28
SH3BP4	680	0.000243	0.00182	1.6	1.6	61.3	38.3
RAMP1	161	0.000245	0.00183	1.76	1.76	23.1	13.1
NPTX1	596	0.000246	0.00184	0.635	-1.57	31.3	49.3
TOMM34	202	0.000247	0.00184	0.655	-1.53	14.9	22.7
SMIM10L2A	33.1	0.000249	0.00185	1.66	1.66	3.07	1.85
LOC652276	61.7	0.000251	0.00187	0.659	-1.52	3.83	5.82
TSPO	121	0.000253	0.00188	0.633	-1.58	8.36	13.2
OIP5	76.9	0.000254	0.00189	0.661	-1.51	6.81	10.3
OSR1	27.9	0.000255	0.00189	1.72	1.72	3.8	2.22
GAR1	64.4	0.000256	0.0019	0.593	-1.69	4.88	8.22
COMMD8	61.9	0.000259	0.00191	0.649	-1.54	4.87	7.5
CRACR2A	22.8	0.000261	0.00192	0.54	-1.85	1.64	3.03
ZNF763	36.7	0.000261	0.00193	1.64	1.64	2.9	1.77
LOC101929570	14.8	0.000264	0.00194	2.4	2.4	1.23	0.512
GPX3	27.4	0.000267	0.00196	2.01	2.01	3.22	1.6
SNORA71A	269	0.00027	0.00198	0.577	-1.73	15.8	27.4
KLF7	1160	0.00027	0.00198	1.52	1.52	123	81.2
LOC102724532	17	0.000271	0.00198	2.02	2.02	1.53	0.755
CD248	112	0.000271	0.00198	1.52	1.52	14.8	9.71
CNTNAP3	17.1	0.000271	0.00198	0.494	-2.02	0.85	1.72
NAV1	1100	0.000277	0.00202	1.82	1.82	89.7	49.3
SERTAD1	34	0.000279	0.00203	1.74	1.74	3.78	2.18
ACE	71.2	0.000289	0.00209	0.594	-1.68	5.25	8.84
PLEKHA7	36.8	0.000292	0.00211	0.622	-1.61	2.25	3.62
PJA1	457	0.000305	0.00219	1.54	1.54	46.1	30
TEN1-CDK3	39.8	0.000314	0.00224	0.483	-2.07	2.51	5.2
DYNC1I1	20.8	0.000316	0.00225	0.529	-1.89	0.584	1.11
ABCC9	20	0.000316	0.00226	0.493	-2.03	0.717	1.45
CPT1B	47.9	0.000318	0.00227	0.57	-1.75	2.8	4.91
MAN2B2	98	0.00033	0.00234	1.51	1.51	8.56	5.66
XYLB	67.3	0.00033	0.00234	0.654	-1.53	5.1	7.8
LOC101927661	111	0.000331	0.00234	1.6	1.6	11.1	6.97
SHC3	42	0.000332	0.00235	1.62	1.62	3	1.85
MAP1A	2470	0.000332	0.00235	1.56	1.56	164	105
BOC	43.5	0.000333	0.00235	0.599	-1.67	3.83	6.4
MIR137HG	71.7	0.000333	0.00235	1.84	1.84	7.35	4
DNER	92.3	0.000334	0.00236	1.63	1.63	9.27	5.69
BMS1P14	33.2	0.000336	0.00236	1.68	1.68	2.46	1.46
C8orf58	42.8	0.000338	0.00237	1.61	1.61	3.95	2.46
DNM3	51.7	0.000341	0.00239	1.57	1.57	4.58	2.92
PSMB10	38.8	0.000342	0.0024	0.622	-1.61	2.92	4.7
PLEKHG1	14.4	0.000351	0.00245	2.27	2.27	1.75	0.77
CHD5	51.6	0.000352	0.00245	1.64	1.64	4.67	2.85
PCGF5	101	0.000357	0.00249	0.667	-1.5	8.94	13.4
CCDC157	34.2	0.000361	0.00251	1.64	1.64	3.42	2.09
AP1S3	29.6	0.000363	0.00252	0.616	-1.62	2.03	3.29
HHEX	20.6	0.000369	0.00256	0.516	-1.94	1.58	3.05
VSTM2A-OT1	18.2	0.000371	0.00256	1.94	1.94	2.24	1.15
PAOX	17.6	0.000372	0.00257	2.09	2.09	1.89	0.905
PLAGL1	63.6	0.000375	0.00258	0.612	-1.63	4.85	7.93
LGALS8	39.7	0.000376	0.00259	0.616	-1.62	2.53	4.11
LOC100130691	18	0.000385	0.00264	1.88	1.88	1.83	0.972
ZNF396	17.6	0.000386	0.00265	1.87	1.87	1.71	0.913
PPP2R2A	405	0.000391	0.00268	0.655	-1.53	28.4	43.3
FGFR2	182	0.000393	0.00269	0.657	-1.52	17.5	26.7
SLC41A2	60.9	0.000396	0.0027	1.61	1.61	6.89	4.28
DPYSL2	5320	0.000405	0.00276	1.52	1.52	585	385
LOC101927751	63.4	0.00041	0.00279	1.51	1.51	6.91	4.59
ADAMTS4	626	0.000412	0.00279	1.53	1.53	39.1	25.5
NABP1	38.6	0.000415	0.00281	0.645	-1.55	2.9	4.5
LINC01976	46	0.00042	0.00284	0.631	-1.58	4.21	6.67
NEURL1B	155	0.000421	0.00285	1.64	1.64	20.6	12.6
PDE4A	24.7	0.000433	0.00291	0.46	-2.18	1.14	2.47
HMGN3-AS1	34.6	0.000434	0.00291	1.62	1.62	3.47	2.15
MAST4	37.7	0.000434	0.00291	1.72	1.72	5.64	3.28
BMPR2	777	0.000441	0.00295	1.54	1.54	69.9	45.5
LOC100289230	28.6	0.00046	0.00306	1.86	1.86	2.99	1.61
RILPL2	48.4	0.000463	0.00307	0.616	-1.62	3.99	6.48
SLC2A3	83.2	0.000468	0.0031	1.59	1.59	8.87	5.56
RPGR	55	0.000478	0.00316	0.659	-1.52	4.58	6.94
BTN3A1	85.7	0.000485	0.00319	0.658	-1.52	6.07	9.23
PSTPIP1	85.6	0.000489	0.00321	1.51	1.51	6.48	4.29
PLCXD2	59.8	0.000492	0.00322	1.57	1.57	4.06	2.58
MAP1B	10600	0.000493	0.00322	1.63	1.63	832	509
TCEAL3	86.4	0.000498	0.00325	1.51	1.51	9.88	6.54
RAPGEF4	25.6	0.000506	0.00329	0.595	-1.68	1.47	2.47
RNF112	107	0.000507	0.0033	1.52	1.52	12	7.91
MYADM	99.8	0.000523	0.00339	1.62	1.62	12	7.39
FRY	66.8	0.000524	0.00339	1.51	1.51	6.83	4.51
PVT1	39	0.000527	0.0034	0.635	-1.57	2.52	3.97
MEIOC	51.2	0.000535	0.00344	0.645	-1.55	4.05	6.28
VWCE	33	0.000544	0.00348	0.622	-1.61	2.42	3.89
RHBDF1	18.4	0.000544	0.00348	1.93	1.93	2.14	1.11
CCDC149	16.5	0.000545	0.00348	1.9	1.9	1.82	0.96
ZFP36L1	18	0.000546	0.00349	0.373	-2.68	1.31	3.52
NFKBIB	49.5	0.000565	0.00359	0.589	-1.7	3.72	6.31
PAPPA	24	0.000565	0.00359	2.2	2.2	1.16	0.526
ZSWIM3	86.9	0.000569	0.00361	1.51	1.51	8.52	5.63
KIFC2	34.3	0.000578	0.00365	1.6	1.6	2.93	1.83
AHCTF1P1	17.5	0.000581	0.00367	0.557	-1.79	1.16	2.08
PCDHB3	32.9	0.000582	0.00367	1.7	1.7	2.93	1.73
CBWD3	23.6	0.000584	0.00368	0.581	-1.72	1.75	3.02
SHISA4	14.3	0.000591	0.00371	1.98	1.98	1.45	0.734
SNHG10	65.6	0.000591	0.00371	0.66	-1.52	5.34	8.1
SLC7A11	38.6	0.000594	0.00373	0.601	-1.66	2.52	4.18
MFNG	17.8	0.000596	0.00373	0.498	-2.01	0.641	1.29
ZYX	203	0.000598	0.00374	1.63	1.63	19	11.7
OLFML3	26.7	0.000612	0.00381	2.02	2.02	5.08	2.51
LINC01518	18.2	0.000614	0.00383	1.86	1.86	1.57	0.841
SORD2P	38.4	0.000618	0.00384	0.589	-1.7	2.66	4.51
CGNL1	47.2	0.00062	0.00385	1.7	1.7	7.38	4.33
CXXC4	14.5	0.000622	0.00385	0.495	-2.02	1.12	2.26
TLE6	35.5	0.000642	0.00396	1.69	1.69	4.97	2.94
SPRY4	40.6	0.000643	0.00396	1.76	1.76	2.74	1.56
PABPC3	19.3	0.000647	0.00398	0.487	-2.05	1.02	2.09
PPP1R13B	85.6	0.000647	0.00398	1.55	1.55	9.5	6.13
EFCAB2	35.3	0.000648	0.00398	1.57	1.57	3.94	2.52
SGCZ	18.6	0.000662	0.00406	1.73	1.73	2.41	1.39
UG0898H09	24.5	0.000689	0.0042	1.7	1.7	3.34	1.97
SOCS3	17.7	0.000698	0.00425	1.93	1.93	2.27	1.18
SNHG12	35.6	0.000701	0.00426	0.607	-1.65	2.61	4.31
2023-03-11	21.4	0.000711	0.0043	1.86	1.86	3.16	1.7
ATIC	450	0.000712	0.00431	0.637	-1.57	33.5	52.7
TMEM198B	66.2	0.000715	0.00432	1.51	1.51	4.07	2.69
SV2B	29.7	0.000727	0.00438	1.83	1.83	0.516	0.282
PAXBP1-AS1	45.6	0.000728	0.00439	1.56	1.56	4.15	2.66
SLC16A3	13.5	0.000728	0.00439	2.07	2.07	1.56	0.755
KIAA1107	61.8	0.000738	0.00443	1.64	1.64	2.81	1.72
CACNA1G	14.7	0.000739	0.00443	0.506	-1.98	0.445	0.879
DBNDD2	20.9	0.000751	0.00448	0.548	-1.82	1.31	2.39
SCARNA9	303	0.000752	0.00449	1.5	1.5	31.6	21
HCN3	93.6	0.000762	0.00454	1.51	1.51	9.74	6.46
COL26A1	43.8	0.00077	0.00459	1.54	1.54	4.19	2.72
RETREG1	33.5	0.000787	0.00466	1.71	1.71	3.06	1.79
KCNAB2	13.5	0.000793	0.0047	1.93	1.93	1.51	0.779
FRRS1	27.2	0.000808	0.00476	0.627	-1.59	2.14	3.41
LOC102724428	38.2	0.000814	0.00479	0.594	-1.68	1.23	2.06
CDH22	14.3	0.000831	0.00487	1.91	1.91	1.54	0.803
LINC01828	30.7	0.000836	0.0049	1.69	1.69	3.66	2.17
SOWAHA	19.4	0.000848	0.00496	1.94	1.94	2.92	1.51
SYT13	36.3	0.000864	0.00503	1.6	1.6	4.89	3.05
ARRDC2	33.3	0.000877	0.00509	0.616	-1.62	2.51	4.07
HS3ST4	28.2	0.000898	0.00519	1.67	1.67	3.91	2.34
MGAT4A	25.4	0.000902	0.00521	1.59	1.59	2.16	1.36
TMEM175	48.6	0.000917	0.00528	1.53	1.53	4.61	3.02
CYBRD1	39.9	0.000934	0.00535	0.64	-1.56	3.66	5.72
PCDHA9	38.3	0.000941	0.00538	1.83	1.83	3.23	1.76
TRIM62	37.8	0.000956	0.00545	1.54	1.54	2.73	1.77
FUT9	49.2	0.000983	0.00559	0.599	-1.67	2.23	3.73
ISY1-RAB43	26.2	0.000984	0.00559	1.68	1.68	2.65	1.58
SNORA80B	140	0.001	0.00569	0.596	-1.68	8.72	14.6
PDLIM2	47.7	0.00103	0.00582	1.55	1.55	4.99	3.21
TALAM1	8070	0.00105	0.00589	1.68	1.68	627	372
LY6H	36.3	0.00106	0.00597	1.67	1.67	3.82	2.29
PYROXD2	27.5	0.00107	0.00599	1.58	1.58	2.32	1.47
CABLES1	45.9	0.00107	0.00599	0.666	-1.5	3.63	5.44
RTN4RL1	42	0.00108	0.00601	1.6	1.6	2.62	1.63
ZNF793-AS1	33.4	0.00108	0.00601	1.53	1.53	3.13	2.05
STAT5A	39.2	0.00109	0.00605	0.655	-1.53	2.44	3.73
FLRT1	66.9	0.0011	0.00612	1.51	1.51	6.61	4.37
FAM86C2P	15.9	0.00111	0.00613	0.532	-1.88	1.07	2.01
ARSJ	19	0.00112	0.00617	0.528	-1.9	1.62	3.08
ZNF524	15	0.00113	0.00623	1.97	1.97	1.78	0.907
RAB3IL1	18.2	0.00113	0.00624	0.545	-1.84	1.32	2.43
PRX	40.7	0.00115	0.00633	1.6	1.6	3.82	2.39
TRIM67	200	0.00116	0.00637	1.6	1.6	30.7	19.2
ZNF599	29.6	0.00116	0.00638	1.57	1.57	3.03	1.94
NRN1	49.5	0.00119	0.00649	0.665	-1.5	4.28	6.44
SNORA50C	68.3	0.00119	0.0065	0.49	-2.04	4.09	8.36
SLC16A6	34	0.00121	0.00659	0.659	-1.52	2.28	3.46
TBL1X	163	0.00122	0.00662	0.662	-1.51	13	19.6
PLPP2	13.9	0.00122	0.00662	0.482	-2.08	0.882	1.83
PDGFD	16.9	0.00123	0.00667	0.57	-1.76	0.885	1.55
TP53TG3	18	0.00125	0.00673	1.81	1.81	1.67	0.922
TP53TG3B	18	0.00125	0.00673	1.81	1.81	1.67	0.922
KIAA1324	14.2	0.00125	0.00673	1.92	1.92	1.22	0.636
FLJ42627	111	0.00128	0.00686	0.629	-1.59	6.28	9.99
ATG9B	26.2	0.00129	0.00691	0.614	-1.63	1.85	3.02
CAB39L	33.9	0.0013	0.00695	1.59	1.59	2.93	1.84
SYNGR4	40.3	0.00133	0.00707	1.57	1.57	3.01	1.92
MTRNR2L2	59.6	0.00133	0.0071	1.8	1.8	3.91	2.18
JDP2	61.4	0.00135	0.0072	1.54	1.54	8.43	5.46
ELOVL7	20.2	0.00136	0.0072	0.583	-1.72	1.66	2.84
SNORA52	162	0.00136	0.00723	0.559	-1.79	9.43	16.9
PCDHB15	13.5	0.00138	0.00728	1.83	1.83	1.22	0.667
ZNF688	40.8	0.0014	0.00737	1.51	1.51	4.39	2.91
LOC101593348	15.1	0.00143	0.00749	1.78	1.78	1.12	0.631
PKIA-AS1	20.6	0.00144	0.00749	1.84	1.84	1.62	0.878
FBXL16	78.4	0.00145	0.00754	1.51	1.51	6.46	4.28
ACYP2	31.2	0.00148	0.0077	1.52	1.52	3.19	2.09
AMIGO2	14.4	0.0015	0.00776	1.89	1.89	1.26	0.666
SLC24A2	45.2	0.0015	0.00776	1.57	1.57	5.34	3.41
IL27RA	23.3	0.00151	0.00781	0.548	-1.83	1.67	3.05
PRSS27	22.3	0.00151	0.00781	1.67	1.67	2.18	1.31
TMEM8B	84.6	0.00152	0.00785	1.53	1.53	7.8	5.11
ATP1A3	2190	0.00153	0.00787	1.51	1.51	191	127
GRM4	21.7	0.00153	0.00787	0.592	-1.69	1.04	1.75
CABYR	25.5	0.00155	0.00797	1.67	1.67	2.61	1.56
FAM161B	55.1	0.00158	0.00807	1.51	1.51	5.13	3.4
MOSPD3	59.8	0.00159	0.0081	1.53	1.53	6.35	4.14
TRIM14	28.4	0.00164	0.00831	0.594	-1.68	1.97	3.32
ANXA11	131	0.00169	0.00849	1.52	1.52	16.7	11
RNR1	1890	0.00169	0.00851	1.6	1.6	142	88.8
DYSF	14.5	0.0017	0.00852	1.89	1.89	1.83	0.969
TENM2	42.7	0.0017	0.00854	1.54	1.54	4.81	3.11
CHST15	73.3	0.00172	0.00859	1.54	1.54	10.8	7.02
AMH	32.9	0.00173	0.00862	0.636	-1.57	2.32	3.65
MROH1	30.7	0.00173	0.00864	1.59	1.59	2.61	1.64
SEMA5B	22.9	0.00174	0.00868	0.55	-1.82	0.405	0.736
NAF1	59.6	0.00175	0.0087	0.606	-1.65	4.3	7.1
ENDOD1	47.4	0.00176	0.00876	0.603	-1.66	4.57	7.59
DLG3	53.9	0.00178	0.00883	1.54	1.54	3.16	2.05
VWA1	24	0.0018	0.00892	1.76	1.76	2.52	1.43
NAV2-AS5	49.3	0.0018	0.00892	1.84	1.84	1.7	0.921
ANGPT2	19.2	0.00182	0.009	1.65	1.65	1.27	0.772
HSPG2	28.5	0.00183	0.00905	0.625	-1.6	1.99	3.18
PQLC3	16.9	0.00184	0.00906	1.67	1.67	1.72	1.03
SLC1A3	44.4	0.0019	0.0093	0.54	-1.85	4.56	8.46
LHFP	15.6	0.00191	0.00936	2.08	2.08	2.01	0.97
ADPRHL1	20.1	0.00194	0.00949	1.61	1.61	2.49	1.54
KCNF1	34.3	0.00197	0.00959	1.61	1.61	2.3	1.42
ABTB2	20.3	0.00197	0.00959	0.6	-1.67	1.3	2.17
KCNC4	20.5	0.00204	0.00988	0.563	-1.78	1.7	3.03
KCNS3	24.6	0.00207	0.00996	0.631	-1.59	1.98	3.14
SMIM11B	53.6	0.00211	0.0101	0.631	-1.59	4.28	6.78
ZNF436-AS1	24.8	0.00211	0.0101	1.58	1.58	2.38	1.5
PRR14	53.8	0.00216	0.0103	1.59	1.59	5.04	3.17
PNMA8B	40.1	0.00218	0.0103	1.57	1.57	4.09	2.61
KIF19	47.9	0.00219	0.0103	0.629	-1.59	1.81	2.87
EIF5AL1	25.4	0.00221	0.0104	0.603	-1.66	1.94	3.22
VWDE	16.3	0.00223	0.0105	0.581	-1.72	1.19	2.05
ZNF792	33.8	0.00224	0.0106	1.7	1.7	4.15	2.44
HMX3	45.1	0.00225	0.0106	1.56	1.56	3.16	2.03
COLEC12	49.8	0.00226	0.0106	1.53	1.53	7.89	5.15
DNAH1	21.1	0.00227	0.0107	1.68	1.68	1.39	0.828
RGMB-AS1	15.3	0.00228	0.0107	1.8	1.8	0.899	0.499
NBPF9	42.1	0.00236	0.011	0.639	-1.57	2.65	4.15
GIPR	47.1	0.00239	0.0111	1.58	1.58	2.85	1.8
SNORA84	72.4	0.00241	0.0112	0.65	-1.54	4.73	7.28
TIGD3	30.9	0.00246	0.0114	1.54	1.54	2.97	1.92
CRYGD	30.9	0.00248	0.0114	0.637	-1.57	2.49	3.91
FILIP1	14.6	0.00248	0.0115	1.91	1.91	1.23	0.643
SNORA21	23.9	0.00251	0.0116	0.568	-1.76	1.41	2.47
MSH5-SAPCD1	14.5	0.00255	0.0117	0.526	-1.9	0.949	1.8
CACNG7	34.5	0.00257	0.0117	1.59	1.59	3.11	1.96
NOTCH3	58.1	0.00257	0.0117	0.606	-1.65	4.58	7.55
TBX2-AS1	32.6	0.00261	0.0119	1.51	1.51	4.02	2.66
SLC25A42	33	0.00264	0.012	1.54	1.54	3.05	1.98
FLJ20021	32.9	0.00277	0.0125	1.54	1.54	1.8	1.17
SNORA77B	76.3	0.00277	0.0125	0.547	-1.83	4.75	8.67
LINC01799	14.8	0.00282	0.0127	1.93	1.93	1.95	1.01
IL1RAP	18	0.00288	0.0129	0.563	-1.77	1.34	2.37
VPS9D1	17	0.00294	0.0131	1.79	1.79	1.49	0.83
SETDB2-PHF11	26.1	0.00308	0.0136	1.82	1.82	2.72	1.5
DSCAML1	17.8	0.00316	0.0139	1.64	1.64	1.82	1.11
FIGN	33.4	0.00317	0.0139	0.589	-1.7	2.73	4.63
ZNF846	18.6	0.00318	0.0139	1.62	1.62	1.7	1.05
HAPLN3	20.9	0.0032	0.014	0.614	-1.63	1.92	3.13
PRH1-PRR4	17.1	0.00321	0.014	1.64	1.64	1.59	0.973
NIPAL3	30.4	0.00321	0.0141	1.56	1.56	2.5	1.6
SNORA80D	27.3	0.00322	0.0141	0.533	-1.88	1.71	3.21
LOC100128288	19.9	0.00324	0.0141	1.61	1.61	1.39	0.863
NXPH1	16.7	0.00325	0.0142	0.552	-1.81	1.1	1.99
RPL13AP20	29.1	0.00325	0.0142	0.638	-1.57	1.75	2.74
WDFY3-AS2	22.3	0.00331	0.0144	1.54	1.54	1.23	0.8
CACNA1A	24.8	0.00332	0.0144	1.72	1.72	1.37	0.794
ITGBL1	17.6	0.00332	0.0144	1.77	1.77	1.71	0.966
DHRS1	19.3	0.00334	0.0145	1.81	1.81	2.15	1.19
CD101	26.5	0.0034	0.0147	1.56	1.56	2.34	1.5
PLEKHH2	16.1	0.00341	0.0147	0.59	-1.7	1.27	2.15
TYRP1	18.1	0.00346	0.0149	0.578	-1.73	1.26	2.18
LRRC10B	26.4	0.00354	0.0152	0.636	-1.57	1.38	2.17
NLRC5	19.2	0.00359	0.0154	0.607	-1.65	1.55	2.55
MRC2	32.3	0.00369	0.0157	0.666	-1.5	3.52	5.29
MCRIP2	35.2	0.0037	0.0157	0.642	-1.56	2.25	3.51
RGS8	35.8	0.00371	0.0157	1.75	1.75	1.23	0.706
COL6A6	17.8	0.00374	0.0158	1.9	1.9	3.19	1.68
FAM174B	63.4	0.00377	0.0159	1.51	1.51	8.79	5.82
REEP6	31.8	0.00378	0.0159	1.66	1.66	3.48	2.1
SCN3B	265	0.00384	0.0161	1.5	1.5	31.4	20.9
SDCBP2-AS1	23.9	0.0039	0.0163	1.58	1.58	2.34	1.48
CCDC89	18.3	0.00391	0.0164	1.61	1.61	2.21	1.38
SUGCT	28.3	0.00399	0.0166	0.657	-1.52	2.09	3.19
UBE2Q2P1	34.1	0.00411	0.017	1.61	1.61	2.57	1.6
CTU1	34.5	0.00431	0.0176	0.665	-1.5	2.56	3.85
GRIA2	18.2	0.00432	0.0176	1.66	1.66	1.44	0.868
PGM5	23.4	0.00433	0.0176	1.63	1.63	4.19	2.57
CDKL4	16.7	0.00443	0.018	1.72	1.72	1.59	0.921
MYO15B	13.6	0.00443	0.018	1.71	1.71	0.964	0.562
DGKB	15	0.00448	0.0181	1.68	1.68	1.37	0.812
SMCO4	14.1	0.00456	0.0184	0.524	-1.91	1.07	2.04
LOC101926908	26.4	0.0046	0.0185	1.8	1.8	1.84	1.02
GOLGA8B	145	0.00465	0.0186	0.661	-1.51	9.46	14.3
MTRNR2L8	27.5	0.00488	0.0194	1.73	1.73	2.1	1.21
BTBD8	15.3	0.00489	0.0194	1.62	1.62	1.52	0.937
DOC2A	30.8	0.00493	0.0195	0.654	-1.53	2.3	3.51
SNORA64	34.7	0.00503	0.0198	0.584	-1.71	2.3	3.94
LBHD1	13.6	0.00509	0.02	0.579	-1.73	0.845	1.46
MANEA-AS1	22.8	0.00512	0.0201	1.51	1.51	1.9	1.25
CDK14	44.9	0.00521	0.0204	1.5	1.5	2.25	1.5
CCDC103	23.9	0.00531	0.0207	1.62	1.62	2.45	1.51
GABBR2	14.4	0.00556	0.0215	0.598	-1.67	0.6	1
CHRFAM7A	21.9	0.00562	0.0217	1.61	1.61	3.07	1.91
TMEM158	20.3	0.00566	0.0218	0.594	-1.68	1.43	2.42
THSD1	12.7	0.00571	0.0219	1.7	1.7	1.31	0.772
NID1	114	0.00576	0.0222	0.647	-1.54	10.8	16.7
SERPINB6	17.5	0.00585	0.0224	1.63	1.63	2.06	1.26
MPPED1	26.3	0.00586	0.0224	0.632	-1.58	1.73	2.74
KCNG3	24.7	0.00596	0.0227	0.623	-1.6	1.95	3.14
FTX	19.6	0.00601	0.0229	1.66	1.66	1.33	0.803
ENHO	20.4	0.00603	0.0229	1.65	1.65	1.95	1.18
UBE2QL1	14.3	0.00612	0.0232	1.78	1.78	1.4	0.787
C17orf82	18.9	0.00615	0.0233	1.62	1.62	2.47	1.52
CEMP1	21.4	0.00628	0.0236	0.644	-1.55	1.4	2.17
MAP3K5	21.6	0.00632	0.0237	0.656	-1.52	1.94	2.96
NUTM2B	16.9	0.00634	0.0238	1.66	1.66	1.61	0.971
INPP5J	22.5	0.00642	0.024	1.57	1.57	1.82	1.16
SNORA24	16.7	0.00642	0.024	0.635	-1.58	1.16	1.83
DAND5	19.8	0.00666	0.0247	1.57	1.57	1.92	1.22
NPHP3-ACAD11	28.2	0.00682	0.0252	0.468	-2.14	1.62	3.46
DUSP22	28.7	0.00711	0.0261	0.664	-1.51	2.19	3.3
PALM2-AKAP2	82.1	0.00713	0.0261	0.619	-1.61	5.97	9.63
NPIPA5	21.3	0.00728	0.0265	0.604	-1.66	1.4	2.32
OLFM2	35.5	0.00744	0.0269	1.54	1.54	2.65	1.72
EGLN3	23.2	0.00758	0.0274	0.604	-1.65	1.06	1.75
ERMAP	27	0.00762	0.0275	1.51	1.51	2.83	1.88
NPR3	38.2	0.00782	0.0281	0.592	-1.69	4.36	7.35
FLT4	24.9	0.00783	0.0281	0.646	-1.55	2.17	3.36
TCF7L1	16.5	0.00791	0.0283	0.569	-1.76	1.12	1.98
GPR75	17.6	0.00791	0.0283	0.594	-1.68	0.889	1.5
NELL1	44.6	0.00803	0.0287	1.63	1.63	8.6	5.29
B3GNT4	30.1	0.00824	0.0294	1.55	1.55	2.67	1.72
MRAP2	23.2	0.00828	0.0295	0.618	-1.62	2.26	3.66
RAB4B	21.4	0.00835	0.0297	1.56	1.56	1.76	1.13
PTGES	15.9	0.00852	0.0301	1.64	1.64	1.33	0.812
FHL5	25.9	0.00882	0.0309	1.76	1.76	1.18	0.674
LDB2	18.7	0.0094	0.0324	0.538	-1.86	1.42	2.63
FRAT1	18.6	0.00943	0.0325	1.62	1.62	1.22	0.751
NOVA1	36.3	0.00944	0.0325	1.51	1.51	2.64	1.75
KCNA4	14.9	0.0095	0.0327	1.53	1.53	1.42	0.928
LOC105373156	21.4	0.00959	0.0329	1.63	1.63	2.4	1.48
SLC9A5	20.5	0.00968	0.0332	0.655	-1.53	1.37	2.09
CACNA1D	19.9	0.00976	0.0334	1.52	1.52	1.89	1.25
SNORA38B	22.7	0.00992	0.0338	0.626	-1.6	1.49	2.38
NOTCH2NL	21.1	0.0101	0.0342	0.636	-1.57	1.69	2.66
SNCAIP	21.3	0.0103	0.0347	1.69	1.69	1.43	0.844
PMS2P4	21.1	0.0106	0.0357	1.51	1.51	2.25	1.49
LINC00910	17.2	0.0107	0.0357	1.54	1.54	1.79	1.17
FILIP1L	47.4	0.0107	0.0358	1.5	1.5	1.45	0.965
ITGA6	24.3	0.0108	0.0362	1.51	1.51	2.21	1.46
CHURC1-FNTB	45	0.0109	0.0363	0.534	-1.87	2.71	5.06
ANKLE1	21	0.011	0.0367	0.633	-1.58	1.88	2.97
CASP9	23.4	0.0111	0.0369	1.52	1.52	2.64	1.74
POC1B-GALNT4	18.4	0.0112	0.0373	0.461	-2.17	1.4	3.03
BCAN	16.4	0.0113	0.0374	0.583	-1.71	1.17	2
SLC27A5	17.8	0.0115	0.0378	0.646	-1.55	1.4	2.18
TPBGL	14.3	0.0116	0.0382	1.64	1.64	2.11	1.29
SLC45A1	14.6	0.0117	0.0383	1.64	1.64	1.47	0.897
SNORA71C	38.9	0.0122	0.0398	0.643	-1.55	2.47	3.84
VASH1-AS1	23.3	0.0122	0.0398	0.657	-1.52	1.63	2.48
KLLN	12.6	0.0124	0.0403	1.58	1.58	1.34	0.844
SNORA38	29.8	0.0125	0.0404	0.595	-1.68	1.89	3.18
NFKB2	20.6	0.0126	0.0407	0.612	-1.64	1.56	2.55
LOC100289495	13.1	0.0128	0.0412	1.55	1.55	1.3	0.84
C1orf53	17.2	0.0128	0.0412	0.642	-1.56	1.53	2.38
FAM95A	19	0.0129	0.0413	0.649	-1.54	0.793	1.22
EEF1E1-BLOC1S5	97.5	0.0129	0.0414	0.613	-1.63	8.06	13.1
LOC101928718	13	0.0129	0.0414	1.7	1.7	1.06	0.625
TSPY26P	16	0.0133	0.0422	1.53	1.53	1.74	1.14
BACE2	18	0.0133	0.0424	0.652	-1.53	1.57	2.41
LTB4R	28.9	0.0134	0.0425	0.652	-1.53	1.85	2.84
PCDHGA10	20.4	0.0137	0.0432	1.53	1.53	1.59	1.04
IER3	16.8	0.0138	0.0435	1.51	1.51	1.59	1.05
TGFBR3	21.1	0.0138	0.0437	0.649	-1.54	2.15	3.31
NSUN5P2	14.5	0.0142	0.0447	0.587	-1.7	0.969	1.65
CAPN14	13.1	0.0143	0.0448	1.62	1.62	1.04	0.639
EFEMP2	15.7	0.0146	0.0455	1.55	1.55	1.77	1.14
RCN3	17	0.0147	0.0458	0.648	-1.54	1.52	2.34
REP15	14.6	0.0148	0.046	0.639	-1.56	1.04	1.62
LOC101930105	22.1	0.0151	0.0469	1.56	1.56	2.18	1.4
PCDHB16	14.8	0.0152	0.047	1.54	1.54	1.24	0.806
PCF11-AS1	16.9	0.0155	0.0479	1.51	1.51	1.6	1.05
SNORA67	53.2	0.0159	0.0487	0.653	-1.53	3.28	5.02

## Sheet: siMYCN_72h_LAN5
Gene symbol	Total counts	P-value (siMYCN vs. siCtrl)	FDR step up (siMYCN vs. siCtrl)	Ratio (siMYCN vs. siCtrl)	Fold change (siMYCN vs. siCtrl)	LSMean(siMYCN) (siMYCN vs. siCtrl)	LSMean(siCtrl) (siMYCN vs. siCtrl)
LUM	453.84	9.64382e-11	1.96902e-08	1.88203	1.88203	17.22	9.14968
PMP22	962.126	2.14639e-10	3.47568e-08	1.50603	1.50603	150.305	99.8016
DCN	106.362	9.37368e-09	5.41215e-07	3.0048	3.0048	1.29606	0.431329
COL1A2	129.206	1.73247e-10	2.97646e-08	2.66167	2.66167	4.41743	1.65965
FAM167A	721.102	0.0094623	0.0293753	1.1326	1.1326	96.782	85.4514
PLK2	3798.23	1.16805e-09	1.23725e-07	1.4312	1.4312	236.965	165.571
CLSTN2	1801.77	0.0040813	0.0150793	0.840518	-1.18974	47.5141	56.5296
SSTR2	755.199	0.000324062	0.00198581	1.31631	1.31631	21.946	16.6723
SCG2	4648.46	2.79808e-08	1.20548e-06	1.45936	1.45936	232.925	159.608
PDGFRA	2967.39	0.000242508	0.0015679	1.18846	1.18846	143.847	121.037
SHOX2	475.063	6.17649e-06	8.39097e-05	1.25209	1.25209	24.3832	19.474
DKK2	1658.93	8.33253e-12	4.89119e-09	1.71172	1.71172	112.408	65.67
PAPPA	109.198	4.42877e-07	1.03642e-05	1.98111	1.98111	2.98674	1.50761
PRICKLE1	1075.51	0.955301	0.972546	0.99839	-1.00161	58.1449	58.2386
SCN9A	712.01	4.71108e-11	1.22907e-08	2.00353	2.00353	44.6197	22.2706
PDE7B	125.388	5.42825e-08	1.96589e-06	2.01392	2.01392	4.36871	2.16926
COL12A1	109.489	0.00147253	0.00661512	1.34978	1.34978	3.23894	2.39961
TLL2	289.388	3.41277e-16	4.80791e-12	3.25198	3.25198	25.9442	7.97797
TSHZ3	423.917	0.237214	0.363246	0.948093	-1.05475	17.9283	18.9098
CCDC3	1724.16	1.50858e-10	2.69221e-08	1.45314	1.45314	232.462	159.972
PALMD	244.591	0.000194376	0.0013071	1.35935	1.35935	37.7598	27.7778
CDC5L	4029.79	3.76152e-07	9.05851e-06	1.25533	1.25533	501.304	399.342
INHBA	612.676	1.20526e-05	0.000142328	1.35728	1.35728	31.2893	23.0529
BMF	194.195	0.00245073	0.00994124	1.2091	1.2091	9.449	7.81489
HAND2	4860.23	0.000316335	0.00194929	1.13905	1.13905	571.011	501.306
LAMP5	498.499	2.18997e-10	3.50594e-08	1.66773	1.66773	77.0958	46.228
ISOC1	645.495	0.28513	0.41747	0.959844	-1.04184	34.6533	36.103
CSGALNACT1	222.508	8.66762e-07	1.7595e-05	1.43794	1.43794	31.6856	22.0354
DOK4	1460.15	8.21142e-05	0.000663398	1.32038	1.32038	210.402	159.35
TNFAIP6	155.511	0.0647379	0.13382	0.850907	-1.17522	4.23062	4.97189
COL6A3	118.684	1.1901e-07	3.55967e-06	2.22018	2.22018	4.87499	2.19577
TNS3	540.73	2.17189e-08	1.01992e-06	1.41794	1.41794	73.9272	52.1368
ABCA12	53.3499	0.000298662	0.0018634	1.72632	1.72632	1.24512	0.721256
PRR16	216.894	2.11248e-05	0.000222593	1.34655	1.34655	31.51	23.4006
MCC	1203.59	0.282116	0.414196	1.03961	1.03961	135.406	130.247
BTBD3	1677.3	0.0378221	0.0876665	1.06858	1.06858	103.088	96.4718
C7	237.862	1.72486e-10	2.97646e-08	2.70239	2.70239	12.9517	4.79269
FAT3	116.326	0.461652	0.592814	1.05828	1.05828	3.62422	3.42465
MYCN	14357.5	1.5674e-08	7.99471e-07	0.699752	-1.42908	1289.19	1842.35
AHR	134.915	7.09385e-05	0.000589954	1.46874	1.46874	5.94371	4.04682
NEGR1	318.559	8.59756e-08	2.78881e-06	0.680618	-1.46925	12.1305	17.8227
RIMS3	1589.73	2.26682e-07	6.04829e-06	1.27556	1.27556	191.153	149.858
STMN2	3885.33	4.63159e-11	1.22907e-08	1.63853	1.63853	289.205	176.502
VCAN	17845.1	0.0240728	0.0612715	1.10772	1.10772	963.985	870.245
MTUS1	589.525	1.30938e-05	0.00015245	1.24464	1.24464	37.8345	30.398
CACNA1G	48.7429	0.670906	0.77397	1.04945	1.04945	1.07301	1.02245
ACTN1	2141.97	8.27338e-06	0.00010491	1.20524	1.20524	251.114	208.351
DBH	2738.32	2.07818e-06	3.47704e-05	1.30526	1.30526	343.771	263.374
SILC1	576.97	1.21787e-06	2.32484e-05	1.27203	1.27203	40.1479	31.562
SDC2	1164.04	0.191675	0.308396	0.942893	-1.06057	126.766	134.444
LPAR1	2356.54	7.29734e-05	0.000604024	1.16042	1.16042	161.919	139.536
ASCL1	367.378	0.59132	0.708837	1.02409	1.02409	42.9647	41.9543
ST8SIA4	392.926	0.0975111	0.184147	1.08192	1.08192	21.3055	19.6923
STARD5	96.0165	2.83905e-05	0.000283229	1.60837	1.60837	3.74524	2.32859
NOTCH2	1549.68	0.0220216	0.0571756	0.908316	-1.10094	76.1888	83.8793
DIO3	46.3602	0.00226538	0.00932476	1.45659	1.45659	8.07406	5.54311
NYNRIN	706.081	0.000260507	0.00165989	1.19144	1.19144	44.967	37.7417
GRM7	415.413	4.37962e-11	1.21437e-08	1.70984	1.70984	32.1536	18.8051
EPAS1	70.6011	0.257884	0.386867	1.1422	1.1422	1.82341	1.5964
FRMD6	677.268	9.66265e-05	0.000750928	0.858021	-1.16547	37.1287	43.2725
VIM	10080.2	8.21235e-07	1.68162e-05	1.32703	1.32703	696.431	524.803
COL14A1	68.9666	0.793565	0.86658	1.01868	1.01868	1.88824	1.85361
RASSF8	1217.94	1.44406e-07	4.13931e-06	1.34211	1.34211	85.8722	63.9831
PEG10	1738.05	6.83364e-08	2.37124e-06	0.777403	-1.28633	92.6625	119.195
NEFL	2422.44	9.72006e-05	0.000754054	1.20395	1.20395	153.948	127.87
LGR5	1424.3	8.19073e-06	0.000103956	1.25993	1.25993	171.971	136.493
PLPPR4	762.738	2.20832e-08	1.03358e-06	1.39533	1.39533	95.4946	68.4387
PRSS35	148.218	2.97369e-07	7.48095e-06	1.92366	1.92366	26.8145	13.9393
ADAMTS5	103.093	0.0254654	0.0641783	0.827759	-1.20808	3.38178	4.08547
ASTN2	624.661	2.56364e-07	6.66358e-06	1.45828	1.45828	86.5965	59.3825
H19	5126.51	4.78911e-06	6.80109e-05	0.672311	-1.48741	486.855	724.152
PTGFR	538.365	0.000103593	0.000791012	1.41667	1.41667	81.4755	57.5121
RGS2	316.017	1.04663e-06	2.05935e-05	1.36784	1.36784	22.2456	16.2633
ALDH2	894.635	0.420682	0.554455	1.03397	1.03397	98.2257	94.999
PGM5-AS1	122.683	0.426702	0.55998	1.05758	1.05758	5.5786	5.27488
LMO4	1477.68	2.72052e-07	6.97456e-06	1.33427	1.33427	105.645	79.1783
APBA1	190.839	3.99894e-10	5.46961e-08	2.07452	2.07452	14.0988	6.79617
PGM5	371.734	0.00728187	0.0240645	1.16994	1.16994	21.6449	18.5009
PAQR8	1195.31	0.0135242	0.0391246	1.10068	1.10068	131.957	119.887
NELL2	5931.54	0.784899	0.860451	0.989599	-1.01051	621.512	628.045
STAC	356.196	0.001594	0.00704402	1.20954	1.20954	45.7319	37.8093
RASGRF2	540.851	1.31328e-06	2.47017e-05	1.3286	1.3286	66.0681	49.7274
PDGFRB	1681.91	0.0500392	0.109533	1.10009	1.10009	98.807	89.817
ZNF737	685.82	0.00142761	0.00645654	1.17755	1.17755	43.2027	36.6886
ADAMTSL1	44.4008	0.810401	0.877686	0.945574	-1.05756	0.151968	0.160715
GAP43	688.63	2.9079e-10	4.22335e-08	1.56395	1.56395	55.4542	35.4577
ID4	64.3792	0.000925535	0.00458795	1.61168	1.61168	1.6006	0.993123
ARHGAP26	1186.16	2.19422e-11	7.80895e-09	1.67936	1.67936	97.9645	58.3344
IGFBPL1	1711.4	0.0544216	0.116884	1.06342	1.06342	179.364	168.668
CPED1	47.6721	0.000685351	0.00359867	1.56769	1.56769	1.87479	1.19589
PRCD	351.649	0.00324845	0.0125355	1.17095	1.17095	42.3727	36.1866
SLITRK4	163.479	0.579557	0.698383	0.96727	-1.03384	6.9378	7.17256
NRCAM	1610.5	1.16034e-05	0.0001376	1.29618	1.29618	200.719	154.855
LSAMP	552.528	7.36943e-07	1.55544e-05	1.38257	1.38257	38.2618	27.6744
ARHGAP31	1517.5	4.49301e-08	1.69245e-06	1.36741	1.36741	111.359	81.4377
SLC2A1	615.536	4.6959e-09	3.25891e-07	0.689713	-1.44988	51.5372	74.7227
TMEM200C	461.742	2.84335e-06	4.44092e-05	1.24621	1.24621	33.3402	26.7532
CCDC85A	83.1484	4.88637e-08	1.80277e-06	2.20824	2.20824	4.66195	2.11116
MAN1A1	446.407	7.5453e-09	4.68274e-07	1.52292	1.52292	59.8914	39.3266
SNED1	107.841	0.00671716	0.0225366	1.27499	1.27499	4.99205	3.91536
MYC	53.0537	1.42982e-07	4.12772e-06	3.47002	3.47002	1.88935	0.544478
DLK1	57.4929	0.914248	0.947123	1.01411	1.01411	7.98287	7.87183
HMCN1	131.337	0.0208455	0.0546807	0.801147	-1.24821	15.0186	18.7464
PCDH9	284.733	0.0878012	0.169723	1.15164	1.15164	12.3581	10.7309
PPFIBP2	629.429	1.08328e-07	3.33945e-06	1.3427	1.3427	75.115	55.9432
DDAH1	1433.32	2.01275e-06	3.39468e-05	1.22586	1.22586	161.722	131.925
ISL1	3330.63	1.7711e-06	3.06903e-05	1.24059	1.24059	250.664	202.053
NTNG1	119.894	3.93752e-06	5.82686e-05	1.46272	1.46272	7.58607	5.18628
ADAMTS19	42.8121	0.010508	0.031877	0.64718	-1.54516	0.613481	0.94793
PLD6	404.089	1.31549e-11	6.00694e-09	0.566872	-1.76407	29.4705	51.9879
SSBP2	603.54	0.043644	0.0984402	1.07263	1.07263	40.6438	37.8917
PTH1R	81.8269	1.71782e-09	1.6463e-07	2.31872	2.31872	6.04604	2.60749
AC093849.2	512.026	0.165673	0.275821	1.05388	1.05388	33.0575	31.3673
CNR1	130.052	4.93829e-05	0.000437827	1.42301	1.42301	7.52047	5.28491
LGALS1	1110.75	1.74113e-14	1.22645e-10	2.17135	2.17135	110.75	51.0052
GABPB1	988.996	0.00971021	0.0299534	1.09099	1.09099	69.8331	64.0088
MAGI3	1944.81	0.00415271	0.015295	1.11922	1.11922	211.81	189.249
GPR158	626.536	0.602773	0.718427	1.01928	1.01928	64.6607	63.4377
KCNG1	323.531	0.0229896	0.0591126	0.865323	-1.15564	33.3425	38.5319
PPP1R16B	637.53	6.2374e-08	2.18588e-06	1.36627	1.36627	78.1033	57.1656
IGFBP3	471.757	0.0469365	0.104412	1.23219	1.23219	18.6178	15.1095
LRRC8C	764.231	0.939379	0.96237	1.00475	1.00475	82.1362	81.7481
PARM1	31.2445	0.100074	0.188255	1.25657	1.25657	4.96239	3.94915
PTPRE	290.082	1.0653e-05	0.000128493	1.29982	1.29982	34.972	26.9052
HEBP2	538.715	0.000289564	0.00181629	1.16403	1.16403	38.0178	32.6605
ITGA6	281.374	3.61394e-08	1.43516e-06	1.66784	1.66784	19.4102	11.6379
CYTH3	809.219	8.5032e-05	0.00067987	1.19568	1.19568	57.8595	48.3904
ANK3	270.536	2.88109e-08	1.23428e-06	1.55011	1.55011	19.9711	12.8836
THBS2	302.423	2.88336e-12	2.93362e-09	0.466972	-2.14146	20.3667	43.6143
UNC5C	2195.76	0.000962972	0.00472037	1.12043	1.12043	227.87	203.378
GALNT6	184.887	0.821594	0.885722	0.987227	-1.01294	20.0472	20.3066
SCGN	464.244	2.58345e-10	3.91351e-08	1.95688	1.95688	36.939	18.8764
PPEF1	762.554	0.339736	0.47501	1.04194	1.04194	80.3199	77.087
CUX2	840.659	5.4993e-08	1.98144e-06	1.50984	1.50984	60.8128	40.2778
SPOCK1	493.347	0.00194492	0.00826548	0.846703	-1.18105	47.2262	55.7765
ADAM12	194.283	4.19494e-07	9.86616e-06	1.60481	1.60481	27.2302	16.9679
POPDC2	218.123	1.46002e-07	4.17215e-06	1.46618	1.46618	28.0026	19.099
SLC1A5	1116.66	0.0738512	0.148631	0.930518	-1.07467	112.637	121.048
DKK1	231.88	5.30532e-06	7.39579e-05	1.53077	1.53077	14.4002	9.40717
PTEN	6559.87	0.00263168	0.0105237	1.10697	1.10697	465.797	420.786
LRRN3	3434.18	0.00240065	0.00976903	1.13485	1.13485	371.37	327.241
GULP1	1140.23	0.00752825	0.0246474	1.12386	1.12386	77.5183	68.975
HK2	1059.87	2.40056e-10	3.75767e-08	0.595586	-1.67902	82.1667	137.959
PIK3R1	835.29	2.60634e-07	6.73727e-06	1.28648	1.28648	62.6242	48.6786
SFXN3	383.264	0.780378	0.857152	0.989571	-1.01054	39.1463	39.5589
CTSB	2646.93	1.45126e-08	7.62886e-07	1.2741	1.2741	290.295	227.843
HS6ST3	217.335	3.52876e-09	2.71522e-07	1.69443	1.69443	15.9373	9.40571
PLPP3	161.577	0.00527421	0.0184742	1.29696	1.29696	8.18295	6.30935
BEGAIN	278.162	3.06754e-07	7.65345e-06	1.42484	1.42484	36.348	25.5102
MAML2	318.162	2.78895e-08	1.20548e-06	1.49244	1.49244	24.2392	16.2413
ST6GAL2	885.036	0.0259519	0.0651247	1.09746	1.09746	59.1911	53.9347
FZD5	136.196	0.249642	0.377032	0.919724	-1.08728	15.152	16.4746
FBP1	93.4381	2.68838e-05	0.00026995	1.68355	1.68355	15.4643	9.18552
CCBE1	47.2369	0.911358	0.946147	0.983976	-1.01629	1.8177	1.8473
TMSB4X	2147.42	2.21719e-11	7.80895e-09	1.55901	1.55901	187.917	120.536
BOC	87.5323	0.000504132	0.00284772	0.723345	-1.38247	3.165	4.3755
CTNNA2	3495.15	5.75913e-11	1.39887e-08	1.5607	1.5607	305.256	195.589
SLC35F2	221.29	2.57987e-09	2.20274e-07	0.590725	-1.69283	17.1001	28.9477
SORCS1	1289.54	0.000162277	0.00113726	1.1623	1.1623	92.1152	79.2527
ADGRB3	357.677	0.841257	0.898998	1.01126	1.01126	21.6829	21.4415
SATB1	3171.18	0.01457	0.0413669	1.07494	1.07494	228.457	212.529
ENO1	15307.1	5.90075e-11	1.40898e-08	0.68456	-1.46079	1204.97	1760.21
SCUBE1	693.41	1.77633e-07	4.88769e-06	1.66796	1.66796	50.6613	30.3732
STUM	37.3999	0.000762259	0.00392783	1.75568	1.75568	7.09286	4.03995
NEFM	589.512	4.02417e-05	0.000372242	1.52965	1.52965	37.3718	24.4315
CA10	35.6256	5.06369e-06	7.09823e-05	2.12676	2.12676	1.81088	0.851476
ARHGAP28	838.949	0.438894	0.571348	1.02759	1.02759	56.397	54.883
DUSP10	160.694	6.82334e-06	9.03451e-05	1.37427	1.37427	10.8726	7.91151
TPI1	9696.6	4.56124e-10	5.94988e-08	0.708795	-1.41085	777.225	1096.54
BMPR2	895.86	0.000156573	0.00110566	1.2038	1.2038	61.8279	51.3608
GPI	4756	1.10319e-07	3.37132e-06	0.782841	-1.2774	403.605	515.565
CSRNP3	1557.82	1.7673e-05	0.000193363	1.29685	1.29685	107.764	83.0964
LBH	753.051	2.02681e-05	0.000215826	1.285	1.285	53.4173	41.5697
MSRB2	365.962	2.02258e-10	3.35225e-08	1.58785	1.58785	32.0062	20.157
HECTD2	306.626	0.0290741	0.0711228	1.09816	1.09816	20.8534	18.9894
RET	5132.43	5.26824e-14	1.36512e-10	1.78285	1.78285	658.748	369.49
CEP135	478.155	0.000241494	0.00156206	1.22194	1.22194	33.712	27.5889
MAFB	47.1214	2.76272e-05	0.000276626	2.04246	2.04246	2.31484	1.13336
KANK4	57.5621	0.838238	0.896669	0.991487	-1.00859	1.53315	1.54631
REV3L	1083.11	0.935667	0.960414	0.998362	-1.00164	63.6885	63.793
INPP4B	155.092	0.00660487	0.0222766	0.827551	-1.20839	7.3103	8.83366
EBF1	853.761	0.809755	0.877391	1.0074	1.0074	58.7154	58.2838
PITPNB	969.797	0.175293	0.28826	1.05793	1.05793	99.9991	94.5235
RARB	416.979	0.278364	0.409546	1.05309	1.05309	25.4114	24.1304
SKIDA1	564.986	0.00246752	0.00998059	1.13206	1.13206	40.0699	35.3957
RASL11B	272.269	0.99759	0.998603	0.999334	-1.00067	15.6932	15.7037
NYAP2	27.2155	0.000151133	0.00107425	1.96976	1.96976	1.2245	0.62165
MYLK	136.14	0.000136642	0.0009933	1.31239	1.31239	8.87218	6.76034
PI15	58.2182	0.103797	0.193503	1.27538	1.27538	0.946763	0.74234
B3GALT2	42.1009	0.017967	0.0486674	1.45717	1.45717	1.08998	0.748014
ZEB2	625.054	0.799771	0.87059	0.991137	-1.00894	37.9061	38.2451
RNF144A-AS1	180.006	0.568548	0.688238	1.02657	1.02657	11.3442	11.0505
GDF11	435.009	0.0164417	0.0453054	1.10388	1.10388	30.3241	27.4703
HMCN2	104.416	1.57219e-08	7.99471e-07	1.86669	1.86669	16.57	8.87666
EMC4	803.893	0.358846	0.4935	0.966455	-1.03471	79.5069	82.2666
JUP	567.423	6.50528e-10	7.95658e-08	1.66474	1.66474	47.9179	28.784
SLC29A1	720.741	0.822382	0.886285	0.991837	-1.00823	73.8223	74.4298
FOXC1	839.335	1.44558e-07	4.13931e-06	1.35343	1.35343	66.2119	48.9216
CHODL	146.352	0.000255553	0.00163572	0.696279	-1.4362	5.43759	7.80949
CXXC5	103.697	0.912968	0.946687	1.00397	1.00397	5.57722	5.55515
ST3GAL6	704.713	0.00328457	0.0126464	0.867454	-1.1528	66.9797	77.2141
ZNF608	1234.12	2.64917e-06	4.20762e-05	1.27463	1.27463	94.8638	74.4248
TPM4	6274.44	2.56931e-05	0.000260219	1.15363	1.15363	490.03	424.771
SYT9	871.488	4.08362e-11	1.21306e-08	1.62077	1.62077	110.264	68.0319
ST3GAL6-AS1	166.421	0.0808664	0.159514	0.901347	-1.10945	16.9275	18.7803
UNC79	1003.53	2.70176e-07	6.94569e-06	1.31874	1.31874	80.762	61.2418
MARCHF4	104.284	9.2112e-10	1.04651e-07	2.14942	2.14942	8.46141	3.93661
NRIP1	2418.59	0.000208021	0.00138301	1.16275	1.16275	178.352	153.389
TMPRSS15	142.745	0.227043	0.351493	1.11135	1.11135	6.39304	5.75253
FAM13A	1587.46	6.43873e-05	0.000545781	1.1979	1.1979	117.545	98.1264
PLPPR5	813.714	7.95179e-06	0.000101841	1.30061	1.30061	96.5936	74.2679
UNC5D	242.513	1.31075e-07	3.83108e-06	1.65574	1.65574	16.0086	9.66854
AHNAK	5539.17	2.4605e-08	1.11101e-06	1.61814	1.61814	727.861	449.813
MXRA5	211.089	9.56428e-05	0.000746491	1.40409	1.40409	12.7995	9.11589
TAGAP	20.531	0.00596662	0.020457	0.619736	-1.61359	2.12474	3.42846
SLITRK6	999.469	0.265762	0.395652	1.04727	1.04727	66.7395	63.7269
COL4A1	498.217	0.00249417	0.0100726	0.852996	-1.17234	28.4863	33.3956
SLC8A1	407.133	0.0766602	0.152951	0.92872	-1.07675	39.9084	42.9714
CNTN1	1310.81	0.0151595	0.0426196	1.11575	1.11575	140.57	125.988
CNN2	515.583	2.87364e-06	4.48326e-05	1.37228	1.37228	38.8701	28.3253
PPP2R2B	256.984	0.000104775	0.000797877	1.24911	1.24911	18.3282	14.673
ACSL1	1285.16	4.79694e-06	6.80109e-05	0.830919	-1.20349	111.566	134.268
HDAC9	3906.23	0.750812	0.834908	1.01018	1.01018	380.238	376.407
FILIP1L	94.7135	0.0359236	0.0842364	1.1803	1.1803	5.42219	4.59391
CUL4B	1097.82	0.0439664	0.0989717	1.08042	1.08042	74.0387	68.5275
RORB	1877.6	0.00281236	0.0111013	1.1375	1.1375	131.943	115.995
SERINC5	265.268	0.0097095	0.0299534	1.14219	1.14219	30.635	26.8214
TSPAN18	610.604	0.000818542	0.00415255	1.13815	1.13815	64.3077	56.5022
PTGFRN	2237.19	0.992359	0.995539	0.999629	-1.00037	145.549	145.603
RUNX1T1	293.214	2.85726e-05	0.000284474	1.26802	1.26802	21.8149	17.2039
TAF4B	280.565	2.84919e-12	2.93362e-09	0.473783	-2.11067	17.8889	37.7577
KCTD12	5081.69	0.414935	0.54909	0.972723	-1.02804	478.67	492.094
ALDOC	343.125	0.0173564	0.047268	0.897812	-1.11382	33.3477	37.1433
TRAP1	2107.04	7.71362e-11	1.62193e-08	0.6864	-1.45688	162.669	236.989
HAND2-AS1	4481.33	0.288788	0.421518	1.04048	1.04048	305.338	293.458
PLXNA2	396.164	3.95766e-06	5.84439e-05	1.42905	1.42905	28.3897	19.8661
SPATS1	39.1321	0.0590373	0.124248	1.40084	1.40084	6.5903	4.70452
PPM1E	1050.14	1.63503e-05	0.000181716	1.21483	1.21483	79.9591	65.8194
GALNT13	309.974	0.0291462	0.0712619	0.896555	-1.11538	17.6397	19.675
USP46	593.725	0.00427697	0.0156789	1.11919	1.11919	42.7082	38.16
ADAMTS1	310.605	0.00362401	0.0137171	0.865928	-1.15483	17.9062	20.6786
COL6A6	156.681	0.089142	0.171933	1.19681	1.19681	20.9969	17.544
PMEPA1	487.434	0.000125246	0.000928664	1.23337	1.23337	35.5081	28.7894
ARHGEF40	991.093	1.58029e-07	4.4716e-06	1.40469	1.40469	80.309	57.1721
SNAPC1	348.191	0.000293655	0.00183704	0.833523	-1.19973	30.9719	37.1579
RGPD8	125.707	0.775327	0.853011	1.03812	1.03812	4.79859	4.62239
ATP7A	1364.15	4.61642e-08	1.72085e-06	1.36451	1.36451	159.215	116.683
TUB	1909.57	0.152619	0.258488	0.954488	-1.04768	180.1	188.688
CLMP	2200.64	9.28968e-06	0.000114902	1.2105	1.2105	171.504	141.68
PRRT4	1088.45	6.55141e-10	7.95658e-08	1.54472	1.54472	135.624	87.7987
TP53I11	536.533	0.00330668	0.0127141	1.18405	1.18405	36.9617	31.2164
XYLT1	156.844	9.24401e-08	2.93972e-06	1.72163	1.72163	11.4465	6.64861
NEIL2	238.411	0.41592	0.550031	0.958996	-1.04276	24.7997	25.86
HRH1	23.1023	0.0321729	0.0772941	1.51176	1.51176	0.657114	0.434668
SLC8A3	176.018	2.77601e-07	7.04655e-06	1.66489	1.66489	25.1419	15.1012
MEIS3	993.762	3.29173e-06	5.04687e-05	1.3314	1.3314	76.4519	57.4223
LAMA4	27.2315	0.00176679	0.00764922	1.74761	1.74761	1.23105	0.704419
TRAF3IP2	45.8296	0.881658	0.926717	0.968212	-1.03283	1.47283	1.52118
ARHGAP22	113.145	0.704099	0.800138	1.02547	1.02547	13.2658	12.9364
SLC6A15	830.972	2.77524e-11	9.30895e-09	0.597473	-1.67372	59.7965	100.082
MALAT1	18487.9	1.25885e-07	3.72932e-06	1.44552	1.44552	1567.65	1084.49
METTL7A	654.41	2.0023e-06	3.38636e-05	0.789763	-1.2662	55.5865	70.3838
CREB5	324.407	7.32473e-05	0.000605935	1.24417	1.24417	22.2858	17.9122
TNFSF13B	82.3484	2.22077e-05	0.000232094	1.54973	1.54973	12.3033	7.93901
NOD1	92.3954	0.00322252	0.0124619	0.800365	-1.24943	8.94678	11.1784
CPVL	128.777	0.0013859	0.00631249	0.774024	-1.29195	12.5129	16.166
TP53INP1	371.737	2.28193e-08	1.05749e-06	1.46848	1.46848	30.589	20.8304
SSX2IP	657.17	0.0852448	0.166002	1.08421	1.08421	70.0007	64.5637
WDR54	401.403	2.96208e-05	0.000292635	0.803564	-1.24446	35.584	44.2828
BCL2	4615.3	4.84397e-09	3.2967e-07	1.33135	1.33135	388.719	291.973
FLRT2	476.407	7.3939e-05	0.000608797	0.813802	-1.2288	25.9385	31.8732
FBLIM1	270.151	2.40572e-08	1.0979e-06	1.62449	1.62449	22.2455	13.6939
MAP3K13	1069.51	0.00090938	0.00452295	1.15324	1.15324	76.3831	66.2332
ZC3H8	545.444	0.333801	0.469336	1.0408	1.0408	37.3229	35.8597
PFKP	1907.88	6.14672e-08	2.16632e-06	0.777556	-1.28608	159.667	205.344
DNMT3A	2175.92	4.75803e-05	0.000425865	1.19455	1.19455	166.358	139.264
FRY	1085.25	4.87524e-05	0.000433054	1.24075	1.24075	79.5347	64.1022
ARHGEF3	452.547	0.175663	0.2886	1.05589	1.05589	45.4922	43.0841
CGNL1	58.7733	0.000873016	0.00437812	1.48999	1.48999	8.58596	5.76243
ETS2	732.612	6.48787e-06	8.71777e-05	0.821975	-1.21658	62.2038	75.676
AL391807.1	54.8117	0.00852959	0.0271797	1.30465	1.30465	3.42846	2.62787
SVEP1	149.417	0.106331	0.197027	1.10296	1.10296	9.27177	8.40629
ADCY1	1700.72	7.80147e-07	1.62035e-05	1.2944	1.2944	132.375	102.267
FRZB	205.987	0.000151512	0.0010764	0.724654	-1.37997	18.674	25.7695
ALK	3266.1	9.93804e-08	3.14623e-06	1.29659	1.29659	360.68	278.176
SCPEP1	444.075	0.738544	0.825893	1.01791	1.01791	47.5535	46.7166
DLX5	137.004	0.00246694	0.00998059	1.19993	1.19993	15.9307	13.2764
RBP1	1576.93	2.31315e-09	1.99924e-07	1.38434	1.38434	135.946	98.2022
PRSS3	138.597	0.000318008	0.00195778	1.29697	1.29697	17.3935	13.4109
GPR22	30.8915	0.0162882	0.0450113	1.44122	1.44122	1.21225	0.841129
MGAT5	3066.87	8.62456e-06	0.000108679	1.20223	1.20223	241.496	200.873
PAM	940.183	0.124566	0.221521	0.935451	-1.069	90.5956	96.847
PAG1	241.566	0.247725	0.375143	1.06756	1.06756	14.5759	13.6535
AKAP1	1224.44	2.57767e-06	4.12661e-05	0.809842	-1.23481	105.472	130.238
AHRR	102.82	0.0172359	0.0469941	1.2596	1.2596	5.48347	4.35335
NCOA7	923.527	0.000927427	0.00458938	1.15056	1.15056	67.0022	58.2346
TES	711.457	0.000907963	0.00452184	1.15174	1.15174	54.2215	47.0781
GATA4	496.07	0.307927	0.442133	0.955268	-1.04683	48.9169	51.2075
PCDH18	2562.15	3.5221e-07	8.59537e-06	1.30684	1.30684	211.719	162.009
ITGA1	1326.42	0.000394941	0.00234074	1.19911	1.19911	100.255	83.6082
CELF2	291.012	0.113113	0.206176	1.07208	1.07208	30.5676	28.5126
EPC1	616.478	3.61713e-08	1.43516e-06	1.3574	1.3574	52.0841	38.3705
FOCAD	813.363	0.00363388	0.0137471	0.901822	-1.10887	73.7116	81.7363
PCDHB7	815.307	1.43357e-07	4.13008e-06	1.3341	1.3341	66.3124	49.7058
PRDM8	254.369	0.0848384	0.165426	1.07635	1.07635	17.838	16.5727
NREP	8627.17	0.00292224	0.011474	1.1063	1.1063	639.325	577.894
SCARB1	327.854	3.83944e-09	2.82016e-07	0.652896	-1.53164	25.0921	38.4321
NR2F1	132.966	0.142246	0.244535	1.09119	1.09119	8.5278	7.8151
YBX3	853.234	1.36817e-12	2.40936e-09	0.519703	-1.92418	55.8434	107.453
NTRK2	1005.95	1.22604e-07	3.65168e-06	1.37932	1.37932	74.941	54.3317
KCNQ5	415.674	0.977075	0.985571	0.999016	-1.00099	40.8209	40.8611
ADAM23	861.968	8.85098e-06	0.000110739	1.2587	1.2587	67.0314	53.2546
MAOA	4188.28	2.40808e-08	1.0979e-06	1.28146	1.28146	443.882	346.387
PROKR2	55.683	0.00593588	0.0203764	1.60675	1.60675	9.57756	5.96081
PLCH1	136.145	0.00995245	0.0305668	0.777277	-1.28654	13.4592	17.3158
CAST	465.555	0.000165161	0.00115187	0.850602	-1.17564	40.912	48.0977
CASD1	1119.1	1.38518e-07	4.00706e-06	1.29586	1.29586	91.6882	70.7548
DCTN4	1818.92	0.0313742	0.075672	1.06878	1.06878	133.204	124.632
STRA6	1466.16	1.78588e-10	3.03127e-08	1.573	1.573	133.167	84.6581
GPR155	723.147	0.524532	0.649293	1.03562	1.03562	76.0232	73.4086
NCOA2	1730.18	1.31043e-06	2.46809e-05	1.23742	1.23742	136.724	110.491
ATP8A1	1209.24	0.700135	0.797437	0.983366	-1.01692	120.18	122.213
RGS12	607.633	2.74629e-07	7.009e-06	1.37301	1.37301	50.3192	36.649
COL3A1	44.1485	2.25574e-09	1.9923e-07	2.9543	2.9543	4.19176	1.41887
TSPAN9	304.384	4.0198e-07	9.51781e-06	1.49167	1.49167	25.1694	16.8733
STXBP5	1750.37	7.68776e-06	9.90898e-05	1.37684	1.37684	217.942	158.292
NBEA	3365.64	0.00870491	0.0276018	1.08318	1.08318	247.433	228.433
LPAR3	185.858	1.34104e-06	2.50762e-05	0.697102	-1.43451	15.1444	21.7249
AK4	539.542	3.89321e-08	1.51095e-06	0.63884	-1.56534	42.3895	66.3539
AC008124.1	555.028	0.975361	0.984445	0.998319	-1.00168	37.7228	37.7863
MIR100HG	1001.22	0.724866	0.81581	1.01765	1.01765	64.82	63.6959
MYCNOS	486.725	1.36615e-05	0.000158406	1.35049	1.35049	61.7183	45.7008
PNP	780.662	0.0245199	0.0621813	0.922989	-1.08344	73.8237	79.9832
HIF1A	5666.34	0.00213063	0.00887027	1.09817	1.09817	552.607	503.209
CD58	71.8362	0.000142163	0.00102497	1.38199	1.38199	5.24589	3.7959
SAMHD1	861.871	0.568285	0.688037	1.02134	1.02134	58.9323	57.7011
NCALD	643.534	5.49184e-06	7.60011e-05	1.2874	1.2874	49.0481	38.0985
SAMSN1	20.6101	0.017507	0.0476411	1.51622	1.51622	3.18594	2.10124
KHDRBS3	1106.85	6.16369e-11	1.44674e-08	1.51135	1.51135	98.4721	65.1549
CHRNA7	2135.35	5.21088e-10	6.55474e-08	1.41914	1.41914	244.975	172.622
PXDN	1042.28	0.745907	0.83129	1.01055	1.01055	74.2114	73.4365
HEG1	63.1611	0.0207772	0.054559	0.795751	-1.25667	6.24845	7.85226
FNBP1L	2571.31	1.75424e-08	8.64118e-07	1.32692	1.32692	217.718	164.078
DDAH2	1052.79	5.66947e-09	3.7422e-07	1.5397	1.5397	92.1764	59.8665
BNC2	446.94	0.0335989	0.0799159	0.898283	-1.11324	26.2931	29.2704
SRRM4	209.471	0.842582	0.899606	1.01175	1.01175	12.8666	12.7171
NHS	133.614	0.015732	0.0438212	0.825566	-1.21129	12.73	15.4198
MYL6	5760.3	4.69861e-12	3.53471e-09	1.5761	1.5761	542.989	344.515
PBX1	1634.86	0.0131716	0.0383629	1.10109	1.10109	118.999	108.074
JMJD1C	2697.01	1.29258e-05	0.000150994	1.23612	1.23612	213.072	172.371
RNF144A	2120.65	0.254923	0.383282	1.03698	1.03698	152.727	147.281
AARS2	1045.89	4.1379e-06	6.04836e-05	1.2745	1.2745	119.046	93.4066
KIAA1549	1611.12	4.36749e-05	0.000397219	1.19102	1.19102	122.509	102.86
CADM4	571.89	3.6991e-10	5.1597e-08	1.60647	1.60647	52.9143	32.9383
PTPRT	145.795	0.0533339	0.115052	1.1279	1.1279	9.19475	8.15207
AMER1	767.311	0.292172	0.425483	1.03831	1.03831	76.1273	73.3188
UCK2	1223.86	0.0479588	0.106033	0.936283	-1.06805	113.861	121.609
KAT6B	669.24	4.75091e-09	3.26492e-07	1.48529	1.48529	58.9103	39.6625
PGM1	1165.88	3.4215e-05	0.000328129	0.841243	-1.18872	101.18	120.275
ARFGEF3	106.314	0.0281215	0.0693222	1.21776	1.21776	5.71513	4.69316
AC010478.1	1363.26	8.27718e-05	0.000665576	1.22434	1.22434	104.81	85.6048
PLOD2	819.09	6.97529e-05	0.00058078	0.765927	-1.30561	71.7505	93.678
CBLN2	284.594	8.80043e-09	5.18747e-07	1.72459	1.72459	24.5944	14.261
FN1	1685.33	4.54781e-06	6.53104e-05	1.37135	1.37135	127.51	92.9815
THG1L	346.154	0.000220907	0.00144683	0.814181	-1.22823	31.1553	38.2659
LDHA	12261.2	2.20753e-09	1.9923e-07	0.661908	-1.51078	948.703	1433.28
SYN2	226.667	0.00237095	0.0096705	1.21116	1.21116	26.126	21.5711
IGSF3	3296.67	8.85831e-05	0.000702679	1.18368	1.18368	256.63	216.807
HS3ST3A1	61.581	0.184578	0.299716	0.851229	-1.17477	7.03491	8.26442
LMNTD1	23.1646	0.00439735	0.0160243	1.58969	1.58969	1.1396	0.716866
LAPTM4A	728.174	0.0495957	0.108815	0.92756	-1.0781	48.3463	52.1221
CACHD1	1043.06	9.97886e-10	1.10695e-07	1.46308	1.46308	91.1704	62.314
PLEKHG2	322.576	1.10215e-07	3.37132e-06	1.41712	1.41712	26.9453	19.0141
ETV1	381.91	0.0327911	0.0785515	1.11258	1.11258	40.8437	36.7109
LTBP1	434.342	2.99322e-08	1.26253e-06	0.692529	-1.44398	22.5882	32.617
NR3C1	87.5988	0.0905088	0.174089	0.874475	-1.14354	4.51526	5.16339
TESC	35.4524	0.346777	0.482031	1.09676	1.09676	4.41938	4.02947
ITGB5	180.481	0.00945995	0.0293744	0.871391	-1.14759	16.1663	18.5523
PELI2	269.679	0.000216281	0.00142478	0.793753	-1.25984	23.7687	29.9446
MAGED2	2020.93	5.7232e-11	1.39887e-08	1.54179	1.54179	188.13	122.02
SEMA5A	859.848	0.0917035	0.175843	0.932	-1.07296	52.6257	56.4653
GPRIN3	22.419	0.174695	0.287613	1.2423	1.2423	0.587994	0.47331
TMOD1	1838.12	4.17906e-08	1.58265e-06	1.29473	1.29473	192.189	148.439
SGCE	328.132	0.130179	0.228673	1.08919	1.08919	22.3563	20.5257
ADCYAP1R1	431.528	0.0379603	0.0879145	0.918193	-1.0891	40.7446	44.3748
MIR99AHG	1166.35	0.0757291	0.151566	1.12296	1.12296	75.9022	67.5909
PUS7	775.606	3.85743e-11	1.20763e-08	0.65994	-1.51529	56.4204	85.4933
TAFA2	44.2687	0.384554	0.519973	1.10511	1.10511	1.49967	1.35704
IPO4	589.703	6.29172e-09	4.02899e-07	0.660163	-1.51478	45.03	68.2104
ARHGAP5	370.467	0.0348546	0.0822775	1.08909	1.08909	26.4905	24.3235
SNX25	432.361	0.0618623	0.12919	1.08456	1.08456	45.5982	42.0431
EYA4	74.9123	0.0840421	0.164169	0.860089	-1.16267	3.64838	4.24187
CASZ1	33.8367	0.0566404	0.120482	1.27529	1.27529	1.65976	1.30148
DCAF4	230.515	7.05641e-10	8.42464e-08	0.602187	-1.66062	16.8595	27.9971
CPE	1698.72	0.0100787	0.0308714	1.12099	1.12099	125.665	112.102
LRP1	771.48	0.00284287	0.0112123	1.12128	1.12128	58.8231	52.4609
TFRC	5640.07	2.8742e-09	2.35417e-07	0.709914	-1.40862	436.597	614.999
RAB30	452.584	2.8496e-05	0.000283912	1.27283	1.27283	34.2268	26.8902
ARHGAP29	343.104	0.000675111	0.0035555	1.23988	1.23988	38.8567	31.339
COQ8A	422.651	1.22811e-09	1.2816e-07	0.593389	-1.68523	30.9578	52.1712
PMEL	318.896	1.59034e-05	0.000178239	1.29119	1.29119	36.1172	27.972
RPS6KA2	938.174	1.43682e-06	2.622e-05	1.24424	1.24424	100.671	80.9101
ROBO2	27.5728	0.561159	0.682057	0.942947	-1.06051	0.73663	0.7812
TBC1D1	514.943	0.250245	0.377822	0.96008	-1.04158	48.7794	50.8076
ZCCHC24	121.53	0.999309	0.999663	1.00432	1.00432	7.00766	6.97749
SEZ6L	599.002	2.70419e-08	1.18129e-06	1.44025	1.44025	68.6218	47.6456
TMEM45A	240.377	4.14718e-07	9.77014e-06	0.674442	-1.48271	19.2908	28.6026
AC048341.1	58.0698	0.11043	0.202754	1.19591	1.19591	3.1854	2.66358
PCLO	417.831	0.00149135	0.00668901	1.28709	1.28709	27.5793	21.4277
MICAL3	967.3	0.000144975	0.00104249	1.15369	1.15369	74.9521	64.9672
CYP4V2	117.517	0.000186329	0.00126338	1.36562	1.36562	8.31553	6.08918
GRIA3	293.134	2.08071e-09	1.92849e-07	1.66682	1.66682	26.3116	15.7856
TMEM167A	1742.15	0.0089842	0.0282647	1.10937	1.10937	131.064	118.143
CASC15	1275.63	0.0102571	0.0313114	1.09207	1.09207	97.851	89.6016
PIK3R3	986.562	0.00136974	0.00625509	1.15442	1.15442	76.6234	66.3737
FAM162A	691.768	5.21104e-10	6.55474e-08	0.491593	-2.0342	46.7138	95.0253
SORD	971.149	0.0142054	0.0405769	0.924522	-1.08164	87.6026	94.7545
FRAS1	1112.98	0.00506231	0.0179101	0.892713	-1.12018	71.1202	79.6675
GBP4	308.289	0.00637393	0.0216585	1.14217	1.14217	20.8788	18.2799
NFXL1	1633.36	0.00237328	0.00967441	1.10779	1.10779	124.165	112.084
AL392083.1	870.229	0.0963081	0.182438	0.940703	-1.06303	77.5299	82.4169
ALDOA	4890.71	2.79563e-08	1.20548e-06	0.761326	-1.3135	397.201	521.723
RRP12	392.84	8.70692e-09	5.15391e-07	0.646221	-1.54746	29.269	45.2925
JUN	698.115	0.016707	0.0458717	1.1257	1.1257	50.0838	44.4911
TPM1	792.134	1.13511e-09	1.23011e-07	1.54845	1.54845	74.0228	47.8045
CTTNBP2NL	690.199	3.40539e-05	0.000326806	1.19928	1.19928	54.5855	45.5154
MMP16	2089.21	0.000247919	0.00159775	1.18738	1.18738	160.324	135.024
DPYSL3	10686.5	1.48359e-11	6.24773e-09	1.67647	1.67647	1019.71	608.248
ZMAT4	44.9675	0.00951067	0.0294994	1.35541	1.35541	2.60368	1.92095
RGL1	421.037	0.0441001	0.0992306	1.09234	1.09234	29.6435	27.1376
ADGRA2	778.444	0.056684	0.120541	0.907169	-1.10233	48.7022	53.686
ADSL	996.743	5.49778e-06	7.60086e-05	0.813162	-1.22977	84.3211	103.695
ETV5	838.791	2.56549e-10	3.91351e-08	1.45225	1.45225	95.3798	65.6773
CHRNA3	1561.32	4.48431e-14	1.36512e-10	1.88364	1.88364	206.214	109.476
CD55	117.895	3.3729e-05	0.00032413	0.710699	-1.40706	10.0788	14.1815
S1PR2	303.04	0.000172757	0.00119125	1.25505	1.25505	23.3404	18.5972
C15orf39	139.67	0.000132915	0.00097172	0.78203	-1.27872	11.9756	15.3134
RGS4	14656.3	0.259629	0.388781	0.953408	-1.04887	1332.13	1397.23
AHCY	3342.68	1.60215e-08	8.0611e-07	0.765182	-1.30688	268.765	351.243
IQCN	66.3704	7.60726e-05	0.000622726	1.55506	1.55506	4.51372	2.90259
ABCB6	421.239	1.27094e-07	3.75367e-06	0.695602	-1.4376	34.1084	49.0344
KANK2	352.75	4.08514e-05	0.000376676	1.25522	1.25522	28.2092	22.4734
PCDHB8	1751.52	1.72448e-07	4.78611e-06	1.28023	1.28023	147.395	115.131
KLLN	101.884	0.000709865	0.00370223	1.25424	1.25424	7.73324	6.16569
SOX11	8372.94	9.337e-05	0.000732812	1.21247	1.21247	659.368	543.823
CD101	55.1492	0.00542919	0.0189323	1.36512	1.36512	3.55424	2.60362
CLCN3	2269.07	0.0282566	0.0695456	1.07331	1.07331	219.805	204.792
ENDOD1	254.407	0.70103	0.798069	0.981913	-1.01842	24.8446	25.3023
AC092645.2	67.528	0.106032	0.196576	1.13954	1.13954	4.2751	3.7516
SLC1A1	82.0623	0.00233568	0.00956821	0.792744	-1.26144	7.63332	9.62899
ICA1	1017.08	0.661285	0.766197	1.01684	1.01684	100.518	98.8533
TMEM158	62.118	0.304934	0.439181	0.892435	-1.12053	6.91791	7.75172
SLC38A2	4719.68	3.35962e-05	0.000323516	1.15942	1.15942	377.627	325.702
CCND1	16510.9	1.11855e-07	3.39614e-06	1.39129	1.39129	1383.5	994.405
NFATC4	397.968	0.277831	0.409016	1.04811	1.04811	28.7725	27.4518
H3-3B	10678.1	2.76431e-07	7.02952e-06	1.23183	1.23183	891.216	723.488
TBPL1	680.439	0.145097	0.248133	1.05767	1.05767	50.1575	47.4228
ATP1A1	3515.54	0.00220306	0.00910969	1.12524	1.12524	360.091	320.013
SMARCD2	1159.66	0.381328	0.516851	0.97493	-1.02571	107.049	109.802
CCNG2	504.837	2.94154e-06	4.57905e-05	1.30301	1.30301	41.4158	31.7848
CD200	592.019	0.00274121	0.0108814	1.14134	1.14134	45.1698	39.5763
PARD3B	57.5928	0.00373808	0.0140357	1.34162	1.34162	3.85043	2.86999
XPNPEP1	1280.98	0.0241199	0.0613582	1.07884	1.07884	126.569	117.32
BMI1	826.346	0.00569669	0.0196945	1.11023	1.11023	63.569	57.2577
RASSF8-AS1	207.687	0.000200087	0.00134166	1.29955	1.29955	15.3161	11.7857
SPIN1	1873.53	2.10677e-07	5.65336e-06	1.26228	1.26228	157.018	124.392
PTDSS1	1304.16	8.4474e-07	1.72134e-05	0.800239	-1.24963	108.245	135.266
SOS2	770.311	7.5748e-08	2.54687e-06	1.31878	1.31878	65.918	49.9839
NAP1L5	298.141	2.13002e-09	1.96129e-07	1.59224	1.59224	26.4736	16.6267
CCDC88A	2893.41	0.0365744	0.0853363	1.10154	1.10154	207.996	188.824
NAP1L3	294.067	3.20859e-07	7.84943e-06	1.37247	1.37247	24.7134	18.0066
SLC35D3	157.218	0.574567	0.693926	1.03596	1.03596	16.5327	15.9587
ALDH18A1	2266.45	5.83556e-08	2.09189e-06	0.795371	-1.25728	181.623	228.35
LAYN	241.786	0.920803	0.95135	0.995616	-1.0044	24.753	24.862
PLCB4	1347.29	1.25033e-06	2.36122e-05	1.30888	1.30888	147.535	112.719
SMIM14	498.586	3.82479e-07	9.16389e-06	1.36128	1.36128	41.4733	30.4663
SVIL	804.694	0.000240217	0.00155594	1.14065	1.14065	82.0272	71.9129
BNIP3	1614.3	1.16934e-08	6.38514e-07	0.614945	-1.62616	121.736	197.962
ARHGAP36	584.508	0.00704718	0.023454	1.28499	1.28499	75.4921	58.7493
SLCO5A1	548.569	0.0212168	0.0555063	0.911046	-1.09764	36.3288	39.8759
ZFP90	912.485	2.18159e-06	3.61579e-05	1.24039	1.24039	75.5961	60.9456
FLRT3	911.959	0.00682338	0.0228386	0.867235	-1.15309	81.4182	93.8825
LRBA	5166.9	0.423116	0.557065	0.97814	-1.02235	467.717	478.17
DOC2B	302.075	4.67043e-10	6.03642e-08	1.58439	1.58439	36.3941	22.9705
TNS1	169.225	0.000356332	0.00214438	1.36645	1.36645	11.9053	8.71255
ARHGEF28	391.582	9.44943e-05	0.000739165	1.19961	1.19961	40.1387	33.4597
GTF3A	1054.08	1.97986e-08	9.51954e-07	0.74688	-1.3389	82.4373	110.376
TMC3-AS1	46.0924	0.222155	0.345465	1.13758	1.13758	2.39401	2.10448
PCDH17	1306.92	7.06994e-11	1.53233e-08	1.49824	1.49824	144.937	96.7384
FNDC5	29.1589	3.01973e-05	0.000297081	1.90279	1.90279	2.1592	1.13476
ZNF827	228.181	0.00238635	0.00971844	1.21122	1.21122	16.2174	13.3893
DKC1	1355.31	3.72258e-09	2.80448e-07	0.750816	-1.33188	106.053	141.25
PGK1	8345.16	1.70059e-07	4.75356e-06	0.726237	-1.37696	668.067	919.903
MDK	3953.68	0.000783145	0.00401821	1.13556	1.13556	316.432	278.656
DDX21	3576.12	4.27828e-09	3.02876e-07	0.736939	-1.35696	275.806	374.258
SPEG	135.45	4.25037e-05	0.00038807	1.36648	1.36648	10.7063	7.83496
TNIP1	1151.24	6.40965e-07	1.39566e-05	0.78623	-1.27189	95.2923	121.202
DPP6	565.58	0.000308697	0.00191077	1.23066	1.23066	42.0843	34.1966
ETV6	268.735	0.833718	0.893595	0.99135	-1.00873	26.3248	26.5545
IMPDH2	2069.06	4.09961e-10	5.5534e-08	0.716907	-1.39488	157.519	219.721
SAMD11	209.607	0.0485345	0.107016	1.27033	1.27033	11.3633	8.94518
PABPC1	3459.38	1.17576e-10	2.30058e-08	0.653696	-1.52976	247.078	377.971
LAMP5-AS1	31.9589	0.000734641	0.00379803	2.22239	2.22239	6.46804	2.9104
TKT	4249.36	2.3863e-07	6.29555e-06	0.778359	-1.28475	346.85	445.617
CHRM2	276.811	0.000604653	0.00325874	1.21366	1.21366	20.4296	16.8331
DCT	46.0857	0.012697	0.0372115	1.32818	1.32818	6.48562	4.88308
CALCB	121.602	1.75589e-06	3.05018e-05	1.58708	1.58708	17.2202	10.8503
DPP7	1019.2	4.01575e-05	0.000371707	0.798253	-1.25274	86.3266	108.144
ADAMTS7	343.579	9.77682e-05	0.00075735	1.29708	1.29708	27.4384	21.154
CHST11	537.078	2.55442e-10	3.91351e-08	1.66265	1.66265	66.6416	40.0816
AP000542.3	79.6649	0.000806998	0.00410729	1.52865	1.52865	5.34396	3.49586
PKM	13653.5	3.73828e-06	5.62059e-05	0.83401	-1.19903	1151.87	1381.12
PGM2	250.985	0.66014	0.765373	0.980374	-1.02002	24.2173	24.7021
ALCAM	6699.32	5.5745e-09	3.72197e-07	1.36713	1.36713	749.039	547.893
VOPP1	449.436	0.591105	0.708782	1.02372	1.02372	31.7003	30.9658
PTPRR	368.972	6.51757e-08	2.27276e-06	1.46116	1.46116	43.022	29.4437
RFTN1	332.709	1.81494e-06	3.13345e-05	1.38435	1.38435	26.5387	19.1704
MYH15	56.03	5.30564e-05	0.000463488	1.87281	1.87281	3.76241	2.00897
DNM3	248.269	6.15824e-09	3.96152e-07	1.71408	1.71408	21.0606	12.2868
ZNF738	522.751	0.00497804	0.0176696	1.12211	1.12211	40.9648	36.5068
OLFM1	1282.28	0.251168	0.378829	1.0422	1.0422	90.9627	87.2797
FERMT2	2593.88	6.51964e-06	8.74749e-05	1.22924	1.22924	212.819	173.131
SLC1A2	820.193	0.319862	0.454944	0.959755	-1.04193	56.0013	58.3496
ZNF532	1142.31	3.55083e-05	0.000337545	1.17462	1.17462	92.4861	78.7373
SIPA1L2	1434.02	0.000509054	0.00286627	1.16636	1.16636	110.238	94.515
SH3D19	85.423	7.2079e-06	9.41976e-05	1.52267	1.52267	6.80404	4.4685
GIT1	585.221	0.411933	0.54645	0.973353	-1.02738	52.474	53.9105
RPL15	11291.1	3.10086e-09	2.44643e-07	0.727223	-1.37509	859.714	1182.19
RASEF	133.747	0.110775	0.203304	0.895456	-1.11675	12.987	14.5032
ZNF254	564.24	0.00442521	0.0161133	1.15872	1.15872	41.7961	36.071
ZBTB46	250.965	4.00742e-08	1.53414e-06	1.60346	1.60346	21.4895	13.402
CD24	7659.38	0.0703362	0.142883	1.05367	1.05367	590.655	560.569
CHRM4	113.667	8.0324e-07	1.65198e-05	1.62143	1.62143	15.1712	9.35667
TSC22D1	1554.11	0.380594	0.516054	1.0271	1.0271	115.769	112.715
TIMP2	4304.17	7.03059e-08	2.43358e-06	1.30291	1.30291	360.746	276.877
CCNB1IP1	1820.26	1.14498e-07	3.4491e-06	0.744202	-1.34372	144.854	194.644
NOLC1	2857.76	1.51771e-08	7.83203e-07	0.774566	-1.29105	226.162	291.985
ADCY5	186.434	7.98482e-07	1.64459e-05	1.53875	1.53875	15.9285	10.3516
EZH2	807.606	0.38408	0.519482	1.02853	1.02853	61.7235	60.0117
HOXD13	128.483	0.0136522	0.0394447	0.866983	-1.15342	11.6842	13.4769
HGF	22.7789	0.395132	0.529953	0.863281	-1.15837	0.465179	0.538851
PTPRU	87.4041	0.000131706	0.000966915	0.699126	-1.43036	7.49771	10.7244
NCAN	459.248	0.0157287	0.0438212	1.1453	1.1453	33.9787	29.668
LMO1	209.615	0.618487	0.732003	1.03209	1.03209	13.9304	13.4973
JAKMIP1	339.856	0.851515	0.906327	0.992525	-1.00753	32.265	32.508
BCL9L	96.9008	0.136221	0.236661	1.12971	1.12971	6.09527	5.39542
AKAP6	426.267	2.17019e-06	3.60114e-05	1.30192	1.30192	34.3527	26.3863
PLAT	79.4605	0.181251	0.295642	1.13694	1.13694	4.23997	3.72929
ZNF91	1515.55	0.0011774	0.00553701	1.18422	1.18422	114.37	96.5788
ARC	74.2881	0.809968	0.877544	0.978703	-1.02176	8.15211	8.32951
EIF5A	2920.98	4.73945e-07	1.091e-05	0.796381	-1.25568	238.064	298.933
P2RX3	663.132	1.42414e-06	2.61539e-05	1.30147	1.30147	55.895	42.9474
PCDHB16	588.459	4.34526e-05	0.000395452	1.24122	1.24122	47.558	38.3157
PDLIM7	242.191	3.56136e-05	0.000338317	1.31596	1.31596	19.6731	14.9496
ADD3	2754.4	1.45909e-06	2.64893e-05	1.30562	1.30562	307.199	235.29
ARID2	1882.28	0.498872	0.62779	1.02359	1.02359	139.688	136.468
FAM160A1	28.8619	0.184732	0.299896	0.810632	-1.2336	0.955768	1.17904
COL6A1	984.814	5.46619e-06	7.57204e-05	1.4617	1.4617	79.8282	54.6131
HAND1	180.535	0.197968	0.316605	1.08037	1.08037	18.718	17.3255
NRSN1	547.021	0.427796	0.560944	1.04711	1.04711	56.6845	54.1345
DHCR24	4244.03	0.000413635	0.00242804	1.11826	1.11826	417.914	373.719
TTC9B	415.175	0.00101926	0.0049464	0.866226	-1.15443	35.7118	41.2269
NME1	4524.66	1.14587e-09	1.23229e-07	0.747693	-1.33745	352.11	470.929
DDR2	2239.68	0.00455681	0.0165199	0.910817	-1.09792	154.359	169.473
AKAP12	5391.73	3.49512e-08	1.41087e-06	1.37116	1.37116	463.001	337.671
ABAT	179.687	3.1058e-07	7.72599e-06	1.52825	1.52825	15.7847	10.3286
CBX4	179.747	0.000129242	0.000952781	1.27682	1.27682	14.0943	11.0387
KCNK9	20.6993	0.0184702	0.0497244	1.60213	1.60213	3.37566	2.10698
LRPPRC	4205.37	2.22131e-08	1.03622e-06	0.778229	-1.28497	329.382	423.245
SYT4	494.559	4.45941e-11	1.21437e-08	1.87532	1.87532	68.5815	36.5705
BAZ2B	1322.92	2.76972e-06	4.36102e-05	1.30035	1.30035	109.268	84.0298
DOCK11	941.971	0.000503242	0.00284383	1.16525	1.16525	73.5593	63.1277
ADAMTS2	206.34	0.0465892	0.103771	0.865141	-1.15588	19.3627	22.3809
DGLUCY	364.562	0.000577251	0.00313505	0.849396	-1.17731	31.3307	36.8858
IMPDH1	424.789	0.0152387	0.0428165	0.899628	-1.11157	37.9586	42.1937
IGSF11	42.4965	0.000408438	0.00240455	1.74042	1.74042	2.64831	1.52165
LZTS1	548.387	1.81088e-05	0.000196395	1.32088	1.32088	44.7329	33.866
REXO2	287.909	7.15138e-07	1.52419e-05	0.725236	-1.37886	23.3862	32.2463
GLS	909.558	0.000416933	0.00244434	0.860438	-1.1622	78.1043	90.7727
BAMBI	1097.62	1.48396e-08	7.74297e-07	1.41152	1.41152	95.7516	67.8359
SPTLC2	1544.9	0.779803	0.856665	0.990742	-1.00934	143.166	144.504
MPPED2	105.732	0.460206	0.591766	1.06471	1.06471	11.6851	10.9749
CADM3	708.616	2.66954e-10	3.95878e-08	1.75075	1.75075	67.0812	38.3158
BTG1	623.168	0.00252696	0.010183	1.12278	1.12278	48.1931	42.9229
CYP1A1	22.8232	0.0156982	0.0437674	1.51063	1.51063	1.16518	0.771325
CPT1A	1670	9.80524e-09	5.5486e-07	1.38312	1.38312	146.929	106.23
PTPN13	1742.18	2.64388e-09	2.21709e-07	0.692151	-1.44477	99.2696	143.422
PDIA4	2389.32	0.0150952	0.0425144	1.07484	1.07484	230.054	214.035
COL5A1	99.4105	0.633346	0.74337	0.952755	-1.04959	5.15005	5.40543
OPRD1	483.53	0.0141445	0.0404768	1.1337	1.1337	50.9829	44.9704
CCDC80	702.736	0.0189642	0.0507572	1.09699	1.09699	70.8857	64.6181
COL6A2	1052.61	2.95785e-06	4.59936e-05	1.44609	1.44609	85.2797	58.9727
AMOT	167.41	0.704006	0.8001	1.02269	1.02269	10.0005	9.77861
ST6GALNAC3	917.525	0.3324	0.467911	0.963071	-1.03834	84.7961	88.0476
HMBOX1	856.372	0.841438	0.898998	0.992352	-1.00771	56.7977	57.2354
GBE1	202.805	3.53406e-06	5.37666e-05	0.751098	-1.33138	16.325	21.7348
LINC02073	78.6426	2.93223e-14	1.36512e-10	4.80267	4.80267	11.0207	2.2947
GAB1	332.127	0.689661	0.789208	1.01598	1.01598	23.3644	22.9969
VEGFA	829.304	0.196507	0.314733	0.939807	-1.06405	79.1012	84.1675
FLNC	66.7704	0.887843	0.93047	0.977309	-1.02322	3.6475	3.73219
CITED2	98.788	0.000165641	0.00115408	0.729674	-1.37048	4.86811	6.67162
NRXN1	435.825	1.01445e-09	1.11653e-07	1.91489	1.91489	41.0753	21.4504
GRIK2	114.488	0.222042	0.345373	0.911	-1.0977	6.87107	7.54234
PRRX2	117.786	0.0278226	0.0687219	0.839485	-1.19121	6.26371	7.46137
CMAHP	40.9786	9.58979e-05	0.000747372	1.64618	1.64618	2.86052	1.73767
KIF5C	7076.58	2.29792e-06	3.75203e-05	1.22598	1.22598	740.83	604.274
SYT1	3990.53	0.00106667	0.00513223	1.13887	1.13887	308.201	270.62
YPEL2	190.271	0.968269	0.979975	0.997957	-1.00205	12.7458	12.7718
PHYHIPL	1159.37	0.00109888	0.00525671	1.13153	1.13153	115.03	101.658
SLAIN2	989.081	5.7106e-05	0.000492356	1.18678	1.18678	78.2676	65.9494
MB21D2	384.094	4.12372e-06	6.03897e-05	1.34185	1.34185	32.1547	23.963
NME2	4719.37	1.51752e-08	7.83203e-07	0.779912	-1.2822	375.767	481.807
LOX	132.394	1.73595e-08	8.61127e-07	0.524215	-1.90761	8.97581	17.1224
DZIP3	831.958	0.000420156	0.00245639	1.1611	1.1611	67.0717	57.7654
RAB3B	67.8371	2.66315e-08	1.17328e-06	2.42213	2.42213	6.22813	2.57134
LMO3	28.8438	1.87411e-05	0.000201699	0.44728	-2.23574	0.703006	1.57174
AK2	1012.5	1.24604e-09	1.29058e-07	0.736684	-1.35743	76.673	104.079
RBM28	1269.42	0.0122854	0.0361983	1.09495	1.09495	124.921	114.088
WDR46	509.29	8.22684e-09	4.99437e-07	0.700553	-1.42744	38.519	54.9837
ATP2B4	169.548	8.17582e-05	0.0006612	1.33199	1.33199	13.015	9.77105
AC010980.2	109.958	0.726783	0.816827	1.02044	1.02044	7.30045	7.15424
PES1	1021.18	1.80212e-07	4.92976e-06	0.757441	-1.32023	80.5375	106.328
APRT	267.663	0.000146198	0.00104867	0.777186	-1.28669	22.9562	29.5376
GABARAP	1158.27	4.48518e-06	6.46748e-05	1.2331	1.2331	98.628	79.9836
DOCK5	1229.49	1.23533e-10	2.38402e-08	1.61055	1.61055	114.346	70.9977
AHI1	423.39	0.624981	0.736921	1.02085	1.02085	30.521	29.8976
POLR1B	931.789	4.65251e-07	1.07274e-05	0.759455	-1.31673	73.7954	97.1689
B3GAT1	211.907	1.69205e-06	2.96857e-05	1.44185	1.44185	18.1987	12.6218
GLDC	380.202	7.15515e-06	9.39439e-05	0.736492	-1.35779	31.8461	43.2403
UNC5A	202.643	0.451727	0.583472	1.092	1.092	11.5588	10.585
AFF3	482.687	3.35206e-08	1.37679e-06	1.375	1.375	40.8416	29.703
TMCC3	89.0026	0.731254	0.820127	1.02746	1.02746	5.22113	5.08161
NR2F1-AS1	88.9549	0.0652291	0.134526	0.872032	-1.14675	5.16006	5.91728
PPA1	2618.83	1.25976e-08	6.77385e-07	0.752818	-1.32834	204.659	271.857
FAM217B	280.096	0.025682	0.0646431	1.10762	1.10762	21.1358	19.0821
EZR	2390.17	8.1458e-06	0.000103572	1.23961	1.23961	253.081	204.161
SLC39A14	709.933	1.28901e-05	0.000150952	0.82987	-1.20501	59.2428	71.388
RIOX2	694.244	0.00673951	0.0225847	0.891818	-1.1213	61.7167	69.2032
SH3PXD2B	1023.33	4.82322e-05	0.000430045	1.22221	1.22221	83.2313	68.0989
C1QBP	1777.23	1.2982e-08	6.95211e-07	0.756587	-1.32173	138.08	182.504
HDHD5	785.026	3.00344e-08	1.26306e-06	0.765452	-1.30642	62.0752	81.0961
CAMKV	497.444	4.74028e-09	3.26492e-07	0.652392	-1.53282	36.819	56.437
NUAK1	35.4122	0.000255231	0.00163441	1.79523	1.79523	2.4671	1.37425
RAPGEF2	1135.86	0.0708515	0.143744	1.07795	1.07795	109.682	101.751
NOCT	240.288	0.127941	0.226038	0.935053	-1.06946	22.3055	23.8548
SNHG16	5530.9	3.31172e-11	1.06035e-08	0.673004	-1.48588	394.779	586.593
ME2	1362.83	1.06244e-06	2.08173e-05	0.810185	-1.23429	110.067	135.855
SNN	523.57	0.000791099	0.00404391	1.19944	1.19944	41.0252	34.2035
DNAJC6	721.986	0.0128661	0.0376053	1.09133	1.09133	70.0202	64.1605
HMGN4	703.016	0.0376159	0.0872892	0.917991	-1.08933	62.8403	68.4541
TSPY26P	209.558	0.000485801	0.00276635	1.22347	1.22347	16.0475	13.1164
TMEM97	2013.09	5.12822e-07	1.15965e-05	0.819649	-1.22003	164.937	201.229
SNPH	250.803	1.30288e-11	6.00694e-09	2.32651	2.32651	26.7268	11.4879
KMT2C	1689.78	0.00351459	0.0133857	1.17261	1.17261	125.42	106.958
STARD4-AS1	447.997	0.392026	0.527197	1.05195	1.05195	30.7248	29.2075
KCNH1	219.036	4.05527e-06	5.95111e-05	1.36512	1.36512	25.8298	18.9212
PCBP3	565.9	3.70199e-05	0.000349789	1.23579	1.23579	60.2869	48.784
CTBS	164.751	0.274844	0.405956	1.05945	1.05945	16.7724	15.8312
TWSG1	321.073	2.11433e-05	0.000222621	1.28522	1.28522	26.4774	20.6015
AC241952.2	179.623	0.00134586	0.00616403	1.22144	1.22144	13.4747	11.0318
ETV4	678.39	7.09972e-08	2.44295e-06	1.48215	1.48215	78.9174	53.2452
DHRS7B	149.418	0.362334	0.496891	0.955052	-1.04706	14.4394	15.119
WDR44	546.753	1.21527e-07	3.62728e-06	1.40692	1.40692	46.5921	33.1164
INSRR	30.283	7.13968e-07	1.524e-05	2.27612	2.27612	2.55886	1.12422
TMX4	1870.7	9.79225e-07	1.94849e-05	1.28096	1.28096	199.375	155.645
TENM4	4221.54	2.06934e-07	5.58485e-06	1.27449	1.27449	356.057	279.372
TLE4	2006.23	2.16283e-05	0.000226711	1.15319	1.15319	166.146	144.075
SCD	6914.33	0.128461	0.226587	0.950887	-1.05165	619.127	651.105
SMPDL3A	95.8938	0.00206825	0.00868479	0.767296	-1.30328	5.2723	6.87127
ITPR3	38.1956	0.0696002	0.141838	0.830134	-1.20462	3.58565	4.31937
TCEAL1	132.803	0.502478	0.630132	0.960811	-1.04079	12.6594	13.1757
MAP3K1	7204.65	4.43969e-06	6.41501e-05	1.22493	1.22493	729.222	595.319
IMP4	624.379	5.35591e-08	1.94717e-06	0.739693	-1.35191	48.7879	65.957
EEF2K	617.546	5.98307e-07	1.31702e-05	0.776115	-1.28847	49.174	63.3592
DSE	482.882	0.00018117	0.0012336	0.798409	-1.25249	40.4208	50.6267
CBFB	1087.75	0.000270832	0.00171251	1.14796	1.14796	87.8774	76.5511
AC019069.1	74.9227	0.00044452	0.00257502	0.739361	-1.35252	6.53438	8.83788
AC106881.1	155.432	0.295269	0.428973	0.944566	-1.05869	14.538	15.3912
C3orf14	412.556	0.000156053	0.00110365	1.17341	1.17341	33.3652	28.4344
RYR2	37.7013	6.32202e-05	0.00053783	1.6156	1.6156	2.68526	1.66208
LIMCH1	5478.4	0.000223619	0.00146188	1.16799	1.16799	436.92	374.078
SMAD7	213.67	0.00041806	0.00244891	1.25276	1.25276	16.7925	13.4044
SLC10A4	1062.44	1.8518e-06	3.18148e-05	1.2752	1.2752	88.3876	69.3125
ID2	781.488	0.0209104	0.0548169	1.15054	1.15054	57.2493	49.7587
AC106895.2	305.123	0.0431821	0.0976494	0.883113	-1.13236	27.4146	31.0431
POLR3D	709.371	5.46204e-07	1.22476e-05	0.767452	-1.30301	56.8748	74.1086
LIMA1	1105.79	1.43889e-05	0.000164939	1.20235	1.20235	89.2861	74.2594
LIG3	1747.27	0.00128081	0.0059219	0.902043	-1.10859	122.551	135.859
KLF7	2283.03	0.00117316	0.00552573	1.12083	1.12083	216.287	192.97
FRMD4A	131.431	1.53933e-05	0.000173767	1.47518	1.47518	10.724	7.26962
SYNRG	619.406	2.51409e-06	4.04322e-05	1.25462	1.25462	51.716	41.2205
ZNF506	530.225	0.000301108	0.00187368	1.22173	1.22173	41.3703	33.862
DUSP3	163.481	0.000932299	0.00460688	1.20959	1.20959	17.1844	14.2068
MRAS	773.577	2.36519e-08	1.09248e-06	1.40132	1.40132	69.4566	49.5652
PPM1D	1503.27	0.128399	0.226536	1.04804	1.04804	115.885	110.574
CLIC4	1570.32	0.00138297	0.00630322	1.11039	1.11039	127.061	114.43
ID3	226.434	0.219025	0.341708	1.13741	1.13741	13.1685	11.5776
ADCYAP1	575.334	0.419543	0.553264	1.03038	1.03038	54.9708	53.3501
CHL1	26.775	6.11638e-06	8.33342e-05	2.94208	2.94208	1.92146	0.653096
ASS1	20.0044	0.000108035	0.000820042	2.24123	2.24123	3.66955	1.63729
TP53I3	380.23	2.13198e-08	1.00453e-06	1.79238	1.79238	36.6016	20.4207
FAM107B	1008.81	0.748925	0.833536	0.990719	-1.00937	92.1861	93.0497
SEMA5B	75.0911	0.00193349	0.00822987	1.31061	1.31061	8.85304	6.75492
AC136621.1	146.726	1.49618e-10	2.69221e-08	2.15145	2.15145	22.3193	10.3741
CDH4	28.1804	0.00286947	0.0112903	1.4625	1.4625	3.85294	2.63449
BRINP1	234.899	1.11037e-08	6.20751e-07	1.87376	1.87376	32.294	17.2349
IL17RD	2858.22	0.0207688	0.054547	1.08227	1.08227	217.255	200.74
DSCAML1	18.3964	0.0461049	0.102887	1.36063	1.36063	2.323	1.7073
RRM2	2339.27	0.00499035	0.0177044	1.08558	1.08558	188.926	174.032
RFC3	1199.88	0.0560929	0.119642	0.946561	-1.05646	88.5126	93.5097
S1PR3	43.6551	0.471609	0.602032	1.08835	1.08835	2.37559	2.18275
GALNT2	773.12	0.00324721	0.0125355	0.890941	-1.12241	67.4923	75.754
COLEC12	101.549	0.000420208	0.00245639	0.753082	-1.32788	5.31544	7.05825
HS3ST3B1	18.0277	0.118556	0.213474	1.33636	1.33636	2.49504	1.86705
PHLDA1	418.85	2.44364e-05	0.000250971	1.53794	1.53794	54.8712	35.6783
ZNF66	141.914	0.295094	0.428852	1.09371	1.09371	9.16661	8.38119
FGF12	102.6	2.21722e-06	3.66622e-05	1.55004	1.55004	8.73789	5.63719
BRPF3	205.634	2.05238e-05	0.000217786	1.33728	1.33728	16.8785	12.6215
FZD2	574.134	0.283027	0.415089	1.0469	1.0469	42.9722	41.0469
CYTH2	902.82	4.03055e-08	1.53882e-06	1.34967	1.34967	81.5475	60.4201
CD99	1099.42	0.970401	0.981443	0.998054	-1.00195	101.352	101.55
FKBP10	1732.88	1.02807e-05	0.000124535	0.835221	-1.19729	145.456	174.153
CDKAL1	638.79	0.0141557	0.0404926	1.09739	1.09739	63.673	58.0224
HUNK	621.665	0.000145037	0.00104249	1.24937	1.24937	49.8629	39.9103
SEPTIN6	2358.02	5.61021e-09	3.72814e-07	1.35327	1.35327	259.794	191.975
SLC18A1	21.964	2.25118e-06	3.70862e-05	3.39079	3.39079	4.62174	1.36303
NAT10	539.063	9.58936e-09	5.51408e-07	0.715391	-1.39784	40.6965	56.8871
Z83843.1	77.925	0.127383	0.225299	1.19473	1.19473	4.98373	4.17143
KLHL11	1821.43	0.264864	0.39475	1.03613	1.03613	169.435	163.527
ATRNL1	2631.59	1.02023e-06	2.01302e-05	1.26579	1.26579	216.497	171.038
FECH	586.081	0.003572	0.0135676	0.86607	-1.15464	50.4992	58.3084
XPO5	1658.4	2.23445e-09	1.9923e-07	0.739611	-1.35206	125.193	169.268
PTCHD1	92.0628	0.951947	0.970442	1.00569	1.00569	9.33103	9.27828
PDK1	1375.7	1.14384e-08	6.27283e-07	0.570589	-1.75257	97.0161	170.028
ITM2C	587.224	0.032239	0.0774263	1.11816	1.11816	43.1116	38.5557
SIK2	283.982	0.000320869	0.0019718	1.19826	1.19826	23.3383	19.4768
EML1	271.4	0.158252	0.265982	1.08082	1.08082	19.9097	18.4209
SELENOS	475.35	1.55486e-05	0.000175379	1.26381	1.26381	51.9202	41.0824
EML4	5538.5	6.10141e-06	8.32107e-05	1.19311	1.19311	459.638	385.244
ADGRL2	3980.29	0.000252717	0.001622	1.13372	1.13372	325.71	287.293
EEF1AKMT4	52.9653	6.12194e-07	1.3413e-05	0.53114	-1.88274	3.77488	7.10713
ELMO1	538.285	0.0162771	0.0450032	1.11715	1.11715	40.6448	36.3825
ZNF43	740.771	0.013239	0.0385432	1.11492	1.11492	56.3406	50.5332
KCNB1	154.509	0.0335095	0.0797167	0.881544	-1.13437	9.24232	10.4842
CLUH	598.061	2.04273e-05	0.000217356	0.755798	-1.3231	48.575	64.2697
FGF14	1555.29	2.62577e-05	0.000264795	1.20702	1.20702	125.476	103.955
OLFM3	230.26	0.198319	0.317059	1.06835	1.06835	15.6019	14.6036
RPS7	8697.71	1.75346e-09	1.66911e-07	0.693816	-1.44131	651.428	938.907
ZNF117	219.971	0.251798	0.379515	1.07632	1.07632	15.1764	14.1003
NCAM2	166.495	0.00955419	0.0296148	1.21396	1.21396	12.0509	9.9269
EGFLAM	1013.58	0.171881	0.283942	1.06209	1.06209	98.0659	92.3329
ZNF462	2100.2	0.00147653	0.00663095	1.16362	1.16362	163.326	140.36
LIFR	659.236	0.00448394	0.0162935	1.17791	1.17791	48.4128	41.1006
TRIB2	3896.43	2.91529e-12	2.93362e-09	1.67222	1.67222	468.053	279.899
SEMA6A	567.036	0.000369296	0.00221295	0.860747	-1.16178	37.9822	44.127
RGS16	43.4596	7.17952e-06	9.4001e-05	0.530297	-1.88574	1.49495	2.81909
SHB	168.301	0.329729	0.465126	1.05654	1.05654	17.4714	16.5365
PCDHGB1	405.713	0.000141642	0.00102331	1.27204	1.27204	33.1187	26.0359
DGKK	207.774	2.30187e-07	6.1122e-06	1.67006	1.67006	16.5284	9.89686
CLIP1	939.052	2.20821e-07	5.91431e-06	1.3033	1.3033	81.283	62.3671
RPL14	7068.69	6.01035e-09	3.88412e-07	0.776478	-1.28787	551.325	710.033
NFIB	3578.63	0.000161801	0.00113462	1.19496	1.19496	280.345	234.607
ECSIT	563.122	2.294e-06	3.75203e-05	0.752074	-1.32966	44.8142	59.5874
DNASE1	557.738	3.81045e-09	2.82016e-07	1.40318	1.40318	50.7552	36.1714
SLC29A4	523.767	0.000466452	0.00268001	1.23305	1.23305	41.4859	33.645
PDS5B	1607.82	0.061291	0.128187	1.07086	1.07086	120.891	112.891
HADHA	2998.75	3.60478e-09	2.74509e-07	0.752838	-1.32831	226.788	301.245
TNIK	248.71	0.532674	0.656488	0.966113	-1.03508	23.9322	24.7716
LEPR	21.0103	0.452832	0.584417	1.10185	1.10185	0.973655	0.883657
KALRN	850.836	5.18368e-11	1.30407e-08	1.65566	1.65566	82.2247	49.6629
FUT11	398.225	0.00992955	0.0305098	0.898517	-1.11294	34.8874	38.8277
GRID1	182.271	0.499933	0.628564	0.966472	-1.03469	17.312	17.9126
WDR3	1051.36	4.20836e-09	3.00951e-07	0.747538	-1.33773	79.9932	107.009
MTFP1	129.93	1.54757e-06	2.76676e-05	0.647511	-1.54438	9.89135	15.276
NGFR	58.8112	8.70877e-08	2.78881e-06	2.88328	2.88328	4.85511	1.68388
MTHFD1	2182.3	1.11694e-08	6.21956e-07	0.768192	-1.30176	168.494	219.338
SPACA6	47.6862	0.001568	0.00696626	1.47262	1.47262	3.6495	2.47823
ANKIB1	1002.62	2.81178e-06	4.40137e-05	1.23089	1.23089	84.076	68.305
SEMA6C	106.964	1.12347e-07	3.40375e-06	1.65958	1.65958	9.60934	5.79024
CRAMP1	326.608	5.75475e-05	0.000495556	1.22898	1.22898	27.1106	22.0594
GRPEL1	624.215	7.14434e-08	2.44295e-06	0.758492	-1.31841	48.549	64.0073
MID1	95.0481	0.0297646	0.0724971	1.20847	1.20847	6.53821	5.41031
RXRA	398.433	0.00291661	0.0114614	1.18269	1.18269	30.6999	25.9578
CALD1	1766.89	7.0996e-08	2.44295e-06	0.766019	-1.30545	138.277	180.513
RUNX1	34.9915	0.381909	0.51739	0.880723	-1.13543	3.81205	4.32832
SKP2	1401.9	0.000294788	0.00184249	0.867426	-1.15284	119.155	137.366
AFAP1L1	42.5819	0.00814293	0.0261554	0.771808	-1.29566	3.72445	4.82562
TWNK	359.137	3.63604e-06	5.5021e-05	0.743994	-1.3441	28.9686	38.9366
EIF4E3	248.721	0.00108557	0.00520719	1.20513	1.20513	19.7806	16.4136
NFKBIE	204.677	1.60478e-06	2.85457e-05	1.72935	1.72935	28.8782	16.6989
DLG5	1791.74	1.96059e-06	3.34902e-05	1.30922	1.30922	152.58	116.543
RCBTB2	217.889	1.54116e-06	2.76025e-05	1.37489	1.37489	18.5847	13.5172
RSL1D1	2365.32	1.12707e-08	6.25126e-07	0.751368	-1.33091	181.12	241.054
TBX2	1640.77	0.0690428	0.140988	1.101	1.101	122.635	111.385
LRRC4	62.2199	0.00113076	0.00538179	1.3418	1.3418	5.07831	3.78471
MSI2	1956	0.593076	0.7103	0.983271	-1.01701	175.848	178.84
FNDC3B	426.001	0.0482624	0.106587	1.08707	1.08707	31.4179	28.9014
CREBBP	832.298	2.05788e-05	0.000218144	1.21238	1.21238	67.2695	55.4853
CYBC1	555.601	2.50624e-05	0.000255485	1.24467	1.24467	47.5204	38.1792
CTNNA1	2467.69	1.8308e-05	0.000198098	1.16834	1.16834	205.951	176.277
ENC1	1005.95	3.50939e-08	1.41258e-06	1.43285	1.43285	117.274	81.8463
ZNF618	770.479	7.23801e-07	1.54032e-05	1.26417	1.26417	65.2224	51.5932
RABGGTB	1441.02	0.00654582	0.0221251	0.88471	-1.13031	125.29	141.617
DGKG	73.6828	0.000633119	0.0033824	1.53957	1.53957	5.10711	3.31722
HACD1	70.7483	0.489808	0.619281	1.05113	1.05113	7.50378	7.13875
GCNT1	48.4226	9.41971e-05	0.000737659	0.631359	-1.58388	3.90109	6.17888
PPP1R18	755.54	1.5804e-06	2.81832e-05	1.27319	1.27319	64.0887	50.3371
FDFT1	2781.05	0.905978	0.942088	0.996768	-1.00324	253.715	254.538
WDR43	1399.66	7.59188e-09	4.69098e-07	0.748559	-1.3359	107.227	143.245
PHKA2	455.031	0.79443	0.866987	0.990771	-1.00931	40.9989	41.3808
PCM1	3991.09	0.3384	0.473753	1.03404	1.03404	300.808	290.906
MIPEP	96.8804	1.842e-07	5.01936e-06	0.576657	-1.73413	6.84086	11.863
USP9Y	1345.73	1.321e-05	0.000153436	1.21374	1.21374	111.46	91.832
AF127577.4	120.86	0.000418758	0.00245171	1.27107	1.27107	9.20002	7.238
GNG5	474.375	0.0705031	0.143161	0.924882	-1.08122	42.1754	45.6009
BCYRN1	229.33	0.271817	0.402539	1.07653	1.07653	23.7464	22.0582
ZNF286A	2003.73	0.0568688	0.120788	1.06097	1.06097	159.601	150.43
ZDHHC9	316.228	0.0791215	0.15684	0.931471	-1.07357	28.1382	30.2084
AC092279.1	254.211	0.147916	0.252189	1.08983	1.08983	18.5476	17.0188
RRP9	344.9	6.92705e-07	1.48536e-05	0.667332	-1.4985	26.3564	39.4952
SERTAD4	360.059	0.00686351	0.0229348	1.13978	1.13978	27.7096	24.3114
LGR4	367.209	0.443067	0.575505	1.03039	1.03039	26.7596	25.9703
UBE2QL1	266.036	6.67601e-12	4.28921e-09	2.16013	2.16013	28.3682	13.1326
ARHGAP42	508.469	0.000809242	0.00411574	1.22862	1.22862	55.1297	44.8712
IPO5	5909.57	2.10575e-10	3.44951e-08	0.698843	-1.43094	427.972	612.4
SOCS2	574.893	0.151299	0.256683	1.05257	1.05257	44.8006	42.5631
TCF12	2094.24	0.684527	0.785311	1.01314	1.01314	157.275	155.235
PCGF1	206.219	0.298977	0.432797	0.951131	-1.05138	14.4773	15.2212
DENND2A	304.764	1.81442e-08	8.84482e-07	1.52889	1.52889	27.7448	18.1471
DNAJC12	316.912	3.47331e-08	1.41015e-06	0.600879	-1.66423	22.2627	37.0502
ST8SIA3	991.733	0.000507756	0.00286131	1.15907	1.15907	78.7373	67.9313
SYTL4	126.577	3.14427e-07	7.77436e-06	1.65797	1.65797	11.739	7.08037
MXI1	868.997	9.86482e-10	1.10298e-07	0.696021	-1.43674	63.7038	91.5257
GARS1-DT	287.224	0.0817678	0.160898	1.08941	1.08941	21.9203	20.1212
TRMT9B	45.2247	0.374969	0.510711	0.883522	-1.13183	2.11803	2.39726
SGSM1	204.776	9.30475e-09	5.40142e-07	1.56176	1.56176	19.2123	12.3017
AP000542.2	29.1085	0.000260003	0.00165743	1.97889	1.97889	2.07826	1.05021
ACBD7	619.39	0.681493	0.782595	1.01934	1.01934	59.7082	58.5753
RGPD5	454.837	0.000144859	0.00104228	1.30889	1.30889	35.1974	26.8911
SNX3	655.933	0.000119636	0.000894129	0.844603	-1.18399	54.756	64.8304
ARL6	2517.13	0.00271194	0.0107957	1.13573	1.13573	251.159	221.143
MATN2	80.0702	3.61266e-07	8.74034e-06	1.84634	1.84634	7.42019	4.01888
PPP2R3A	391.495	0.00610936	0.0208955	1.14666	1.14666	29.9935	26.1572
PPM1L	466.6	0.560542	0.68165	1.02948	1.02948	32.8743	31.933
MIR181A1HG	82.182	0.892329	0.93313	0.982228	-1.01809	5.15454	5.24781
CDC42EP3	2351.35	3.76943e-06	5.64933e-05	1.2044	1.2044	235.231	195.309
EIF4B	10170.5	1.60832e-08	8.06337e-07	0.745804	-1.34083	773.484	1037.11
INTS10	529.886	0.00538211	0.0188007	0.894244	-1.11826	46.5685	52.0758
BICC1	586.984	0.489229	0.61875	1.02922	1.02922	41.8263	40.639
UBTD2	930.666	2.00829e-06	3.39242e-05	1.24442	1.24442	80.2955	64.5244
MFAP4	399.948	0.000906577	0.00452015	1.21255	1.21255	32.4921	26.7966
AKAP5	183.149	1.14578e-07	3.4491e-06	1.57729	1.57729	16.731	10.6075
ARMH4	32.9139	0.824507	0.887234	1.0049	1.0049	1.61432	1.60645
SCD5	1029.47	8.43296e-05	0.000675897	1.17076	1.17076	85.4393	72.9777
POLD2	1061.16	5.65443e-05	0.000488709	0.82462	-1.21268	88.5702	107.407
MACROH2A2	1793.15	0.00010206	0.00078211	1.18057	1.18057	150.089	127.132
AC107068.1	495.043	0.00452745	0.0164346	1.19385	1.19385	36.9661	30.9637
ADAMTS17	366.908	0.000480986	0.00274559	0.82863	-1.20681	29.5813	35.699
MEIS1	2677.8	0.0067005	0.0224968	1.08769	1.08769	215.267	197.912
PCDHGB6	274.998	1.43591e-06	2.622e-05	1.45953	1.45953	24.4831	16.7746
AC093752.1	177.553	0.939234	0.96237	0.997983	-1.00202	12.244	12.2688
RHOC	357.154	1.09487e-08	6.14525e-07	1.62285	1.62285	33.4649	20.6211
PCDHGA9	153.798	0.00204081	0.0086055	1.24909	1.24909	12.2015	9.7683
TRIM32	363.451	0.841381	0.898998	0.989027	-1.01109	25.2316	25.5115
IGF2	15.5239	0.177717	0.291363	0.727049	-1.37542	1.68759	2.32115
ANKH	480.63	0.000199728	0.00133989	0.85761	-1.16603	40.3756	47.0792
TGFBR2	33.3018	0.994233	0.996851	0.976602	-1.02396	1.71615	1.75726
LINC01116	335.067	0.913984	0.947039	1.00377	1.00377	31.8801	31.7604
LYRM4	470.051	2.2697e-05	0.000235683	0.803428	-1.24467	38.0492	47.3586
EPB41L4B	166.176	0.0135792	0.0392498	1.17182	1.17182	18.2249	15.5526
EXOSC5	198.107	7.13384e-08	2.44295e-06	0.586437	-1.70521	13.9681	23.8185
PRDX6	1646.86	1.29194e-09	1.3189e-07	0.732886	-1.36447	123.352	168.31
PC	275.552	0.0195851	0.0519908	0.885312	-1.12955	24.7783	27.9882
ITM2B	1920.14	9.2647e-07	1.86193e-05	1.22956	1.22956	197.109	160.308
SOX4	5412.06	2.5314e-06	4.0664e-05	1.3217	1.3217	462.004	349.551
SECISBP2L	621.883	1.68355e-06	2.95735e-05	1.28356	1.28356	51.9506	40.474
HSP90AB1	20909.2	0.000190789	0.00128728	0.866382	-1.15423	1772.07	2045.37
LCORL	980.046	0.0762713	0.152326	1.09072	1.09072	72.5301	66.4977
FTL	3326.42	4.83017e-11	1.23723e-08	0.663074	-1.50813	235.23	354.757
SCARNA13	409.742	0.448677	0.580638	1.03931	1.03931	38.9795	37.5051
PCDHB9	230.505	9.83766e-06	0.000120411	1.32116	1.32116	18.9926	14.3757
NOTCH3	502.912	0.0209843	0.0549901	0.883491	-1.13187	32.6618	36.969
REEP3	1614.6	0.000217724	0.00143131	1.17384	1.17384	131.491	112.018
PFN2	3449.07	0.067961	0.139142	1.04685	1.04685	277.797	265.365
TH	31.8879	0.0105755	0.0320402	1.38193	1.38193	4.07935	2.95192
SMARCD3	269.347	3.30832e-05	0.000319668	1.29143	1.29143	22.632	17.5247
GABRA5	63.0906	2.19565e-09	1.9923e-07	0.423367	-2.36202	3.72859	8.80698
BIN1	739.101	0.000140188	0.00101436	1.16679	1.16679	74.2787	63.6609
TNRC18	63.4183	7.32935e-05	0.000605962	1.56384	1.56384	5.15218	3.29457
SPOPL	702.422	0.00345037	0.0131789	1.1276	1.1276	55.8784	49.5551
AC005670.3	876.331	4.94791e-05	0.000438403	1.19957	1.19957	74.2917	61.9321
KIAA0408	949.843	0.000553057	0.00303761	1.18962	1.18962	76.8684	64.6158
ZNF93	514.358	0.124385	0.221254	1.06822	1.06822	39.2255	36.7204
CEP44	765.508	0.924813	0.954209	0.996397	-1.00362	57.077	57.2833
ANXA11	334.469	0.184847	0.29998	0.949351	-1.05335	30.249	31.8628
PGM2L1	392.622	1.68166e-07	4.72879e-06	1.46066	1.46066	34.6639	23.7316
FEM1A	329.669	9.49802e-06	0.000116965	1.3074	1.3074	28.0254	21.436
PPP1R3B	135.567	0.972734	0.98292	0.997908	-1.0021	12.6015	12.628
SYNJ1	230.61	0.00359936	0.0136504	1.19525	1.19525	17.3868	14.5465
FJX1	444.323	7.37531e-07	1.55544e-05	0.781629	-1.27938	35.4462	45.3492
SLC25A19	97.502	0.00327256	0.012607	0.781456	-1.27966	8.36256	10.7013
AMOTL2	85.7945	1.70566e-07	4.7583e-06	1.86701	1.86701	8.12408	4.35138
ITPR2	160.241	0.785634	0.861098	1.01165	1.01165	16.0259	15.8413
ZNF704	3087.05	0.00378756	0.0141803	1.13604	1.13604	237.633	209.176
CYSTM1	51.2319	0.721294	0.812862	0.963413	-1.03798	5.10425	5.29809
KCTD16	1070.92	0.254237	0.382455	0.941471	-1.06217	70.0514	74.4064
MAP4K4	4294.26	4.52318e-06	6.50894e-05	1.23909	1.23909	371.394	299.732
ATOH8	156.385	0.00171807	0.0074843	1.51598	1.51598	11.5126	7.59419
ZNF528	693.5	0.00150551	0.00674394	1.14442	1.14442	56.2911	49.1873
RUVBL1	1515.03	1.17067e-05	0.000138708	0.849616	-1.177	125.462	147.669
CRACD	2081.47	4.77318e-05	0.000426216	1.25361	1.25361	171.551	136.846
CAT	826.729	0.501317	0.629518	0.977106	-1.02343	61.3171	62.7537
PLAUR	107.102	0.136395	0.236846	1.09859	1.09859	8.06974	7.34554
LDB1	1541.29	0.000225861	0.00147517	1.17224	1.17224	127.805	109.027
HERC2P2	287.37	0.169764	0.281203	1.08774	1.08774	21.187	19.4779
STK26	482.97	2.06445e-09	1.92609e-07	0.678538	-1.47376	35.7419	52.6749
WDR47	807.497	4.49682e-07	1.0454e-05	1.3826	1.3826	69.9258	50.5757
P4HA1	701.414	3.92321e-08	1.51841e-06	0.653768	-1.5296	53.1958	81.368
PRDX4	1165.8	4.37831e-05	0.000397946	0.820094	-1.21937	97.7186	119.155
LANCL2	223.429	0.000616873	0.00330689	1.26158	1.26158	17.6898	14.0219
PCGF3	981.279	0.000561192	0.00307152	1.13746	1.13746	81.1956	71.3836
AC022075.1	25.5609	0.0166723	0.0458033	1.59422	1.59422	1.42547	0.894148
PTPRG-AS1	72.8445	0.0626948	0.130445	1.16293	1.16293	5.36586	4.61408
RIMS2	717.526	4.75058e-06	6.7739e-05	1.24976	1.24976	61.1357	48.9179
ENO3	307.024	7.295e-11	1.55715e-08	1.98524	1.98524	31.4104	15.8219
FAM214A	200.367	0.0263038	0.0657386	1.14181	1.14181	15.3641	13.456
PNO1	313.344	8.69755e-07	1.76304e-05	0.754632	-1.32515	23.9091	31.6832
PFKFB4	181.679	0.00034215	0.0020741	0.804657	-1.24277	15.2771	18.9858
WDR35	450.241	3.63253e-08	1.43516e-06	0.688567	-1.45229	32.922	47.8123
ZNF627	623.61	0.00105498	0.00508861	1.1705	1.1705	50.9844	43.5578
GALNT10	52.974	0.0019773	0.00838788	1.38506	1.38506	3.96237	2.8608
ZNF436	253.42	9.30679e-06	0.000115012	1.3421	1.3421	20.7402	15.4535
AC016397.2	18.9018	0.524356	0.649293	0.920854	-1.08595	2.06618	2.24376
KIAA1841	313.621	0.00523405	0.0183609	1.15681	1.15681	24.8552	21.486
RASA3	224.646	0.18847	0.304554	0.931515	-1.07352	20.7649	22.2915
NOL4L	424.549	5.39119e-06	7.47551e-05	1.29339	1.29339	35.5997	27.5243
SLC25A39	1274.7	0.000227342	0.00148278	0.86039	-1.16226	108.287	125.858
CORO2A	498.336	6.10737e-08	2.16182e-06	1.37935	1.37935	54.9351	39.8266
ZFP37	289.948	0.00195617	0.00831078	1.17634	1.17634	22.6853	19.2846
NOB1	271.337	1.6416e-08	8.20102e-07	0.657357	-1.52124	19.3304	29.4062
HSPD1	11116.4	8.16012e-08	2.67972e-06	0.762672	-1.31118	866.91	1136.67
BCL11A	358.867	2.50916e-12	2.93362e-09	0.52629	-1.90009	22.1962	42.1749
FAM163B	104.672	0.592416	0.709751	0.965496	-1.03574	10.0322	10.3907
RN7SL3	1362.77	0.000139807	0.00101213	0.829652	-1.20533	113.079	136.297
DNM1	457.277	0.0389514	0.0898701	1.08748	1.08748	35.9388	33.0477
TRIM24	1812.29	3.82024e-05	0.000357605	1.20187	1.20187	148.152	123.267
PCDHGB4	246.427	0.00298192	0.0116628	1.31085	1.31085	18.9298	14.4409
FZD8	38.9915	0.0646853	0.133747	0.831989	-1.20194	3.60819	4.33682
DQX1	255.53	0.196609	0.31486	1.07457	1.07457	18.5497	17.2625
NAV1	877.92	0.200939	0.319868	1.0554	1.0554	63.5103	60.1766
KLHL13	4245.43	7.90584e-07	1.6355e-05	1.25341	1.25341	362.555	289.255
HES1	40.2154	0.432199	0.565021	1.08587	1.08587	2.52837	2.32843
DDC	1623.53	7.62701e-07	1.5942e-05	1.23107	1.23107	161.824	131.451
HSPA9	5253.66	2.24788e-06	3.70822e-05	0.839744	-1.19084	427.401	508.966
ZFPM1	82.9204	0.000837972	0.00423891	1.45652	1.45652	6.47035	4.44233
HK1	2800.7	0.111533	0.20424	0.943319	-1.06009	250.166	265.198
RNF112	332.408	9.26679e-05	0.000728911	1.23584	1.23584	27.5752	22.3128
CSRP2	1507.8	4.85082e-12	3.53471e-09	1.61887	1.61887	184.214	113.792
POGZ	718.357	0.000855317	0.004308	1.14495	1.14495	57.0338	49.8132
TOMM20	6237.69	1.54819e-07	4.40624e-06	0.800031	-1.24995	493.036	616.272
SHMT2	2080.22	6.9857e-09	4.39351e-07	0.736416	-1.35793	158.54	215.285
GTF2IP4	3211.43	8.74515e-08	2.79369e-06	1.30714	1.30714	282.04	215.768
MFSD6	186.864	0.0883752	0.170599	1.10931	1.10931	19.0905	17.2093
MVP	72.6656	1.5241e-05	0.000172254	1.67351	1.67351	6.12753	3.66148
ZNF528-AS1	247.701	0.00463461	0.0167116	1.15691	1.15691	19.6177	16.9571
UTP20	869.476	1.68147e-09	1.6225e-07	0.691403	-1.44633	62.5599	90.4825
USP8	741.363	0.0269305	0.0669603	1.08022	1.08022	58.7337	54.3719
CASP3	813.383	1.08675e-06	2.12346e-05	1.2572	1.2572	69.0012	54.885
KIAA0895L	448.128	8.57364e-07	1.74294e-05	1.37593	1.37593	40.1727	29.1967
NOP2	298.277	0.000149584	0.00106863	0.834722	-1.198	25.0726	30.037
RAP1GAP2	654.911	9.95677e-05	0.000766927	1.18801	1.18801	65.9002	55.4709
TANC1	836.689	0.77965	0.856563	0.992198	-1.00786	61.7589	62.2445
HMGN2	3627.63	0.0358648	0.0841263	1.06034	1.06034	293.848	277.125
ABCA3	2645.97	0.720315	0.812409	1.01405	1.01405	243.104	239.736
CBX2	2414.75	0.0062843	0.02139	1.12482	1.12482	194.654	173.053
ACY1	205.722	0.00576768	0.0199057	0.85133	-1.17463	18.3929	21.6049
ALG3	205.119	3.34869e-05	0.000322905	0.741262	-1.34905	16.2517	21.9243
ZNF880	287.541	0.0230823	0.0592642	1.10834	1.10834	22.832	20.6003
FAM89A	52.6504	0.00437279	0.0159554	1.32984	1.32984	6.75461	5.07924
KANSL1L	385.081	0.00679882	0.0227672	1.16759	1.16759	30.4165	26.0507
BCOR	2160.12	0.000153825	0.00109063	1.19362	1.19362	173.45	145.314
NDC1	1935.43	0.0130419	0.038048	0.904924	-1.10507	167.814	185.446
MELTF	45.0878	0.00189336	0.00809894	1.47559	1.47559	3.5188	2.38468
THSD7A	3609.48	1.08024e-07	3.33739e-06	1.28344	1.28344	311.807	242.946
KLF12	897.126	1.08768e-05	0.000130633	1.27753	1.27753	73.797	57.7652
KIAA0232	1128.86	6.31978e-07	1.3825e-05	1.30621	1.30621	97.3258	74.5101
ILK	929.389	3.32693e-08	1.37046e-06	1.36294	1.36294	85.0527	62.4038
PCDHAC2	255.312	0.00282882	0.0111631	1.29483	1.29483	28.8841	22.3072
IFRD2	373.247	0.000128076	0.000945171	0.823087	-1.21494	31.0277	37.6968
ASB6	381.574	0.000124539	0.000924885	1.24174	1.24174	31.7647	25.5807
SH3RF1	446.472	1.72583e-07	4.78611e-06	1.32462	1.32462	48.8985	36.9151
CERS6	1817.2	0.0476647	0.105515	1.07575	1.07575	174.173	161.909
INPPL1	835.547	5.81558e-07	1.28618e-05	1.27761	1.27761	74.4424	58.267
GBP2	15.3676	0.20273	0.32185	1.22252	1.22252	0.69623	0.569503
CIAPIN1	710.344	0.0205776	0.0541358	1.07684	1.07684	67.7392	62.9057
APEH	856.574	0.981898	0.988564	0.998696	-1.00131	79.0895	79.1928
TRAK2	829.655	2.54038e-06	4.07154e-05	1.22468	1.22468	71.6258	58.4855
RACK1	15929.7	2.2538e-10	3.56759e-08	0.708924	-1.41059	1164.28	1642.32
AUTS2	647.216	0.0574421	0.121673	1.10594	1.10594	48.7482	44.0787
TM7SF3	808.33	0.329007	0.464434	0.964111	-1.03722	73.592	76.3314
TOP1MT	224.177	2.98474e-06	4.63605e-05	0.671442	-1.48933	17.0746	25.4298
HDAC8	282.084	0.00453226	0.0164457	1.14226	1.14226	23.252	20.3562
TSPAN13	103.754	0.413348	0.547739	1.05877	1.05877	7.47455	7.05965
SOBP	130.907	0.0126087	0.036991	1.17919	1.17919	9.90657	8.4012
DAPK1	364.095	0.0157906	0.0439639	1.1078	1.1078	28.3945	25.6314
ESRRG	812.297	3.8635e-09	2.82016e-07	1.47165	1.47165	93.3847	63.4556
PCDHGA4	301.079	0.000938709	0.0046272	1.3106	1.3106	24.0367	18.3403
C1GALT1C1	188.255	0.000380267	0.00226712	1.25171	1.25171	15.0468	12.021
LPCAT1	1182.83	0.820145	0.884702	0.992914	-1.00714	107.72	108.489
TEX30	234.375	0.857561	0.910286	1.00978	1.00978	17.1617	16.9954
LEO1	1164.06	0.193512	0.310855	1.05011	1.05011	110.801	105.514
ARNTL	264.77	6.26599e-06	8.48387e-05	1.31208	1.31208	23.0912	17.5989
FAM43A	267.189	0.000785843	0.00402295	1.24804	1.24804	20.3952	16.3418
SLC35E2B	1039.3	0.00994904	0.030563	1.09868	1.09868	82.9548	75.5037
MATK	40.1866	7.35712e-08	2.49752e-06	0.367537	-2.72082	2.25986	6.14867
ALKBH8	178.925	5.19326e-05	0.000455866	0.752155	-1.32951	14.4658	19.2325
CBX5	6607.78	0.0120133	0.0355854	1.08841	1.08841	521.175	478.841
DENND5B	941.25	9.31676e-09	5.40142e-07	1.37259	1.37259	84.1957	61.3407
GGCT	306.316	0.001069	0.00513996	0.860303	-1.16238	26.0067	30.2297
PARP8	543.111	1.54196e-06	2.76025e-05	1.27824	1.27824	46.4857	36.3671
FAM72B	145.664	0.000596549	0.00321999	0.794483	-1.25868	12.072	15.1948
TNPO1	5008.24	0.366752	0.501778	0.969622	-1.03133	451.144	465.278
NPM1	16218.4	6.26572e-11	1.44674e-08	0.654519	-1.52784	1140.7	1742.81
TMED3	508.842	6.48766e-05	0.000548609	0.840029	-1.19043	41.984	49.9792
USP32	1545.13	0.000192723	0.00129971	1.13486	1.13486	125.504	110.59
RAB3A	120.684	0.109646	0.201631	0.89132	-1.12193	11.4478	12.8437
SLC6A2	359.067	6.69809e-12	4.28921e-09	2.18153	2.18153	53.3943	24.4756
PLCB1	329.984	0.00213128	0.00887027	1.25667	1.25667	37.1759	29.5829
ZNF714	1158.4	0.997598	0.998603	1.00115	1.00115	82.5341	82.4392
FAM149A	43.9817	0.0219983	0.0571478	1.31081	1.31081	2.95639	2.25539
PTGIS	27.8388	0.191551	0.308268	0.84002	-1.19045	1.35796	1.61659
AL021707.2	82.6263	0.00945799	0.0293744	1.20901	1.20901	6.42868	5.31732
MGAT4A	791.766	0.000370405	0.00221771	1.21375	1.21375	80.9249	66.6733
BASP1	1550.12	8.01697e-08	2.65125e-06	1.35802	1.35802	140.319	103.326
NUP210	899.776	0.000132437	0.000969737	0.858913	-1.16426	74.4163	86.6401
ZNF430	365.79	0.0166627	0.0457947	1.1285	1.1285	28.5571	25.3054
ARID1B	1401.94	0.011216	0.0336767	1.11959	1.11959	109.318	97.641
LSM11	491.421	0.0141231	0.0404238	1.10864	1.10864	48.9821	44.1823
Z97989.1	30.9377	0.0433286	0.0978855	1.3045	1.3045	2.05904	1.57842
URB1	724.746	6.78105e-06	9.00179e-05	0.801806	-1.24718	57.9682	72.297
ZNF300	1101.11	0.0914322	0.175418	1.06686	1.06686	86.2317	80.8276
GPR137C	115.413	3.0528e-07	7.63906e-06	1.64991	1.64991	10.1536	6.15403
PFAS	1531.5	4.38238e-06	6.3387e-05	0.753342	-1.32742	122.478	162.58
FCHSD2	542.952	0.465918	0.596931	1.0257	1.0257	41.3132	40.2781
ENOX1	209.679	0.40624	0.540987	1.04219	1.04219	20.2454	19.4259
MPDZ	1331.52	0.000266367	0.00169157	1.15407	1.15407	109.217	94.6364
ATAT1	190.722	6.03036e-07	1.3233e-05	1.40442	1.40442	17.1176	12.1884
CTNND1	1139.8	0.000859952	0.00432678	1.18478	1.18478	93.0042	78.4992
TMEM33	2850.79	0.00737302	0.0242917	0.902157	-1.10845	241.73	267.946
DYNLT1	891.507	0.0148916	0.0420765	1.07886	1.07886	83.886	77.7542
RPL5	12011.5	2.64553e-10	3.95878e-08	0.660149	-1.51481	847.514	1283.82
IGFBP4	288.492	0.0246453	0.0624691	1.10953	1.10953	21.8873	19.7267
MTHFD1L	491.336	2.91426e-07	7.36404e-06	0.765659	-1.30607	38.6384	50.4643
CNTNAP1	530.311	2.25362e-06	3.70862e-05	1.31412	1.31412	46.9405	35.7201
SEL1L	1175.16	0.191858	0.308655	1.03997	1.03997	91.1848	87.6804
CHD5	377.522	1.50783e-11	6.24773e-09	1.74624	1.74624	38.2497	21.904
TBCK	362.309	0.00179213	0.0077304	1.15486	1.15486	29.9653	25.9471
NCS1	3193.59	0.000148794	0.00106461	1.18099	1.18099	324.997	275.191
SERPINH1	249.748	0.000323774	0.00198491	1.2192	1.2192	20.683	16.9645
PLEKHH3	291.088	7.84833e-05	0.000638811	1.34066	1.34066	24.2942	18.121
DDN	45.3073	1.5004e-06	2.70648e-05	0.515253	-1.94079	3.10849	6.03294
MBD5	245.173	0.0025669	0.0103027	1.22022	1.22022	19.2042	15.7383
CASTOR3	300.295	7.09953e-06	9.33876e-05	1.30516	1.30516	25.5738	19.5945
PIK3AP1	25.0448	0.190726	0.307375	0.827562	-1.20837	2.62813	3.17575
SPATS2L	2837.15	1.56897e-05	0.000176547	1.2253	1.2253	238.973	195.033
FZD7	457.167	1.25343e-08	6.76564e-07	1.49627	1.49627	40.5322	27.0888
PCDHB5	931.333	5.05022e-05	0.000445786	1.25983	1.25983	78.4306	62.2549
PSMA3-AS1	429.618	0.00190437	0.0081324	1.1682	1.1682	34.7047	29.708
ZNF682	220.554	0.232681	0.358057	1.06512	1.06512	16.1196	15.1341
MBLAC2	201.964	3.23158e-06	4.97014e-05	0.718754	-1.3913	15.7345	21.8913
ZNF708	360.488	0.0333283	0.0794012	1.13926	1.13926	26.8844	23.5981
TRIM13	1353.61	0.0534171	0.115173	1.07175	1.07175	105.632	98.5599
SHC1	979.815	4.17031e-11	1.21306e-08	1.57757	1.57757	99.407	63.0127
RNF182	99.5183	0.393982	0.528763	1.06593	1.06593	6.71223	6.29708
SUPT20H	624.861	0.0233915	0.0598292	1.09001	1.09001	50.2372	46.0886
RASL10B	548.182	0.56353	0.684043	1.02582	1.02582	53.0988	51.7624
TNC	2689.9	9.68783e-12	5.24931e-09	2.10383	2.10383	298.371	141.822
AL354793.1	18.265	0.00148246	0.00665338	1.79336	1.79336	1.28279	0.715299
EPHB2	389.516	0.00169351	0.00739557	1.18498	1.18498	31.2896	26.4053
APPL2	352.737	0.126153	0.223749	1.07394	1.07394	27.479	25.5871
EBNA1BP2	287.462	0.000325054	0.0019893	0.842813	-1.1865	24.1706	28.6785
AL356489.2	182.719	0.000553699	0.00303995	1.24315	1.24315	14.7695	11.8807
BTBD11	77.3088	0.130395	0.228939	0.874287	-1.14379	7.40598	8.47088
INTS6	894.749	0.414898	0.54909	1.03481	1.03481	66.6426	64.4011
IPO7	4472.61	3.83488e-05	0.000358737	0.856357	-1.16774	370.552	432.707
PCDHGA10	200.083	0.000706813	0.00368923	1.30119	1.30119	16.2453	12.4849
MEGF9	502.113	0.00056522	0.00308397	1.18475	1.18475	40.6765	34.3334
HOXD8	431.846	0.0210774	0.0552032	0.907879	-1.10147	37.6135	41.4301
EIF2A	1227.48	1.15123e-06	2.23089e-05	0.804078	-1.24366	95.8171	119.164
PCDHGB8P	71.6031	0.0629349	0.130867	1.25205	1.25205	5.0246	4.01311
SLC2A8	123.068	0.00783281	0.02535	1.20412	1.20412	9.21553	7.65332
FBL	1233.99	1.76087e-08	8.64361e-07	0.703994	-1.42047	93.4491	132.741
C2orf16	122.194	0.000609828	0.0032766	1.30754	1.30754	9.32612	7.13255
RPSA	13530.4	1.21854e-08	6.62811e-07	0.75231	-1.32924	1031.07	1370.53
PSAT1	966.931	2.25084e-05	0.000234367	0.851468	-1.17444	80.7059	94.7844
IFI27L2	185.911	2.36206e-06	3.84264e-05	1.40619	1.40619	16.6512	11.8414
CFAP97	1341.8	0.109534	0.20153	0.943863	-1.05948	118.867	125.937
AGTPBP1	4539.93	4.76707e-06	6.79054e-05	1.2847	1.2847	473.641	368.679
SKA2	3130.15	0.000229105	0.0014922	1.13772	1.13772	262.382	230.62
PCDHA10	742.871	4.38925e-07	1.02888e-05	1.34885	1.34885	66.6974	49.4477
SNHG3	199.35	1.8643e-05	0.000201259	0.709268	-1.4099	15.8898	22.4031
CAD	950.937	1.59138e-06	2.8343e-05	0.768721	-1.30086	74.4746	96.8813
FTX	468.53	0.0512072	0.111569	1.18493	1.18493	34.3801	29.0144
SLC16A1	3218.95	3.64325e-06	5.50709e-05	0.815459	-1.2263	259.486	318.209
CD83	154.482	0.301383	0.435743	1.06126	1.06126	11.5984	10.9289
FBXL5	1006.46	0.000110047	0.000833072	1.17097	1.17097	84.2973	71.9894
TXNDC5	1490.1	1.40321e-06	2.58411e-05	0.790044	-1.26575	118.166	149.569
SOD1	2492.99	0.0119021	0.035329	0.929116	-1.07629	214.103	230.437
STK38	605.763	0.00130074	0.00599045	1.14843	1.14843	49.6671	43.2477
LINC00205	474.243	3.01276e-06	4.66928e-05	1.3163	1.3163	41.5026	31.5297
PCDHB14	237.465	0.000567384	0.00309219	1.30661	1.30661	18.4756	14.1401
LRRC37A4P	1005.74	0.00440797	0.0160588	1.24708	1.24708	75.7528	60.7442
PPIF	606.876	3.10839e-09	2.44643e-07	0.730718	-1.36852	45.7033	62.5458
LINC02593	26.0991	0.0427663	0.0969728	1.43445	1.43445	1.47876	1.03089
AFF1	579.296	2.99861e-07	7.51681e-06	0.712494	-1.40352	42.6513	59.862
EPB41L3	327.32	0.704248	0.800138	1.01617	1.01617	24.9826	24.585
IGFBP2	2191.23	0.0499626	0.109433	0.928393	-1.07713	191.192	205.938
TMBIM6	3770.2	0.0122871	0.0361983	1.07723	1.07723	354.635	329.211
EARS2	566.41	6.02931e-07	1.3233e-05	0.765552	-1.30625	44.2602	57.8147
ARNT2	967.101	3.91732e-05	0.000364272	1.24238	1.24238	81.8224	65.8595
WIPF1	388.352	0.00773773	0.0251116	1.13482	1.13482	38.4472	33.8796
PCDHGB7	794.069	3.87448e-08	1.50784e-06	1.38713	1.38713	72.2776	52.1057
RBM5	1212.91	2.89408e-05	0.00028753	1.19474	1.19474	103.8	86.8811
MRPS34	646.467	0.00772331	0.0250763	0.903953	-1.10625	56.473	62.4734
NCOA3	664.216	0.00419006	0.0154084	1.12843	1.12843	52.3765	46.4153
PCDHGA6	293.027	0.0799742	0.158132	1.12981	1.12981	21.9198	19.4013
ARHGEF11	684.402	7.20009e-08	2.45605e-06	1.38131	1.38131	62.6662	45.3671
YLPM1	1230.27	0.0665283	0.136665	1.07209	1.07209	92.998	86.7445
RAB29	190.423	7.1255e-08	2.44295e-06	0.625786	-1.59799	13.7641	21.9949
BHLHE40	86.9772	7.45187e-08	2.52361e-06	0.388844	-2.57172	5.05308	12.9951
IPO9	2954.68	0.00536574	0.0187574	1.09195	1.09195	239.385	219.227
ATF7IP	1834.06	5.33472e-05	0.00046505	1.18303	1.18303	150.184	126.949
DNAJB5	247.105	0.000132207	0.000969563	1.28215	1.28215	20.7705	16.1998
PARVA	80.7313	7.57222e-05	0.000620898	1.4009	1.4009	6.79419	4.84989
IARS2	1116.2	7.10769e-05	0.000590473	0.863492	-1.15809	93.2741	108.02
AC012459.1	118.798	0.158615	0.266496	1.12983	1.12983	8.58656	7.59984
TTL	4130.93	2.66503e-08	1.17328e-06	1.2717	1.2717	365.687	287.557
TENT5A	46.8851	0.622167	0.734634	1.05913	1.05913	5.13325	4.84669
CUL4A	849.776	9.09488e-06	0.000112988	0.836678	-1.1952	68.3498	81.6919
PTN	218.11	5.52191e-07	1.23285e-05	1.49099	1.49099	19.2045	12.8804
DYNLL2	1715.53	1.23698e-05	0.000145585	1.28588	1.28588	147.963	115.068
ZNF536	852.761	1.0824e-10	2.14772e-08	1.51229	1.51229	81.6317	53.9789
RAC3	648.508	0.0103192	0.0314601	0.888536	-1.12545	56.4372	63.5171
PPFIBP1	494.091	0.00477579	0.0171253	1.12673	1.12673	48.7788	43.2924
CLINT1	1323.28	0.0125966	0.0369709	0.927662	-1.07798	113.311	122.147
QARS1	1306.19	6.65693e-06	8.88094e-05	0.7798	-1.28238	104.918	134.545
MEG8	206.018	2.98919e-06	4.63786e-05	1.58022	1.58022	26.5155	16.7797
PHACTR1	340.069	0.106698	0.197592	1.06505	1.06505	26.3274	24.7195
PABPC5	163.42	7.35171e-05	0.000606742	1.31021	1.31021	13.8978	10.6073
PFKM	1975.23	1.10169e-05	0.00013209	0.837863	-1.19351	159.969	190.925
CDR2	287.228	0.00730971	0.0241226	0.88609	-1.12855	24.8099	27.9993
OPRL1	54.0693	0.744664	0.830465	1.03309	1.03309	5.60217	5.42275
TET2	914.908	0.000812826	0.0041295	1.15456	1.15456	72.5185	62.8104
SPRN	74.8116	8.26015e-09	4.99437e-07	2.14777	2.14777	7.74459	3.60588
SNAI2	314.849	0.986455	0.991381	0.994328	-1.0057	22.0751	22.201
AC015813.6	117.887	0.00149382	0.00669793	1.23783	1.23783	9.32519	7.53351
MTHFD2	3072.43	4.42992e-09	3.11349e-07	0.75037	-1.33268	233.505	311.187
OSBPL3	157.437	0.0124402	0.0366035	1.15573	1.15573	16.5576	14.3265
SLC35E2A	429.116	0.000224824	0.00146907	1.22195	1.22195	35.3991	28.9694
AC093512.2	519.101	6.6728e-05	0.000561903	0.720713	-1.38751	42.9578	59.6046
EHBP1	948.492	0.000481726	0.00274759	1.14455	1.14455	76.3108	66.673
CXCR4	4664.91	2.08636e-07	5.62e-06	1.24266	1.24266	412.333	331.815
LINC02607	79.6336	0.0272026	0.0674107	1.22116	1.22116	8.9652	7.34155
ZNF611	263.974	7.65583e-05	0.000625974	1.23298	1.23298	21.6894	17.591
LIPA	263.249	0.00115657	0.00547454	0.8403	-1.19005	22.0862	26.2837
ZNF215	168.795	0.00319756	0.0123792	0.832771	-1.20081	14.3004	17.172
CPOX	225.37	0.000397807	0.00235475	0.826519	-1.20989	18.6213	22.5297
CARD8	330.428	0.0301804	0.0733578	1.10829	1.10829	26.0821	23.5337
MRPS27	1013.36	2.29762e-09	1.99808e-07	0.730188	-1.36951	75.2138	103.006
PACS1	474.265	2.62686e-08	1.16742e-06	1.37432	1.37432	49.3507	35.9092
SOGA3	797.046	1.10443e-05	0.000132175	1.25973	1.25973	69.1899	54.9243
AC244517.6	23.1687	0.0137649	0.0396727	1.45693	1.45693	1.70426	1.16976
DMRTA2	90.3934	0.0472912	0.104892	1.1838	1.1838	6.88227	5.81372
LRIG3	621.668	0.98104	0.987912	0.998838	-1.00116	57.6595	57.7266
CCDC86	221.595	5.51798e-07	1.23285e-05	0.693154	-1.44268	16.6929	24.0826
GPATCH8	635.32	0.000109846	0.000831997	1.18975	1.18975	52.9482	44.5036
AL691432.1	16.4763	0.000715615	0.00372564	1.85393	1.85393	1.3514	0.728936
NACC2	100.899	0.000448498	0.00259271	1.32864	1.32864	8.38602	6.31175
AC005224.3	18.4041	0.14843	0.252876	1.33649	1.33649	2.73754	2.0483
PPAN	330.749	0.000216327	0.00142478	0.81546	-1.2263	27.6485	33.9055
TLCD4	223.024	0.0609779	0.127646	0.898009	-1.11357	19.1958	21.3759
WDFY3	1397.43	6.72589e-05	0.00056536	1.24532	1.24532	114.649	92.0639
MT-RNR1	1681.09	0.000368472	0.00220895	1.42099	1.42099	151.577	106.67
TTLL12	683.347	7.84911e-05	0.000638811	0.77677	-1.28738	55.8022	71.8388
LRRC37B	200.193	0.0273474	0.0676982	1.15723	1.15723	15.1358	13.0794
CBLN1	284.986	0.000930493	0.00460119	0.859074	-1.16404	24.1823	28.1493
TIGAR	282.175	5.67337e-05	0.000490045	1.22966	1.22966	23.7379	19.3045
NRXN2	562.551	7.93667e-07	1.63707e-05	1.45974	1.45974	50.1578	34.3607
FP565260.1	240.189	0.000155478	0.00110014	0.785778	-1.27262	19.6507	25.0079
HFM1	99.1728	0.491809	0.620954	0.960734	-1.04087	6.97423	7.25926
STMN1	5785.2	0.000320935	0.0019718	1.14073	1.14073	481.882	422.433
DDX10	668.237	1.46515e-08	7.67324e-07	0.726942	-1.37563	49.6228	68.2625
SGPP2	140.726	0.00649779	0.0219892	0.825696	-1.2111	8.57376	10.3837
RAB18	1243.82	3.05267e-05	0.000299693	1.16536	1.16536	104.959	90.0659
MAGED4	574.801	5.81684e-06	7.98656e-05	1.39723	1.39723	49.5327	35.4506
ZSWIM8	438.392	3.46898e-08	1.41015e-06	1.39353	1.39353	39.7658	28.5361
MPP6	921.858	1.77367e-08	8.6762e-07	1.40206	1.40206	104.823	74.7635
LINC02691	85.9304	4.44217e-09	3.11349e-07	2.1225	2.1225	8.73198	4.114
AK4P1	44.9401	1.45322e-05	0.000166311	0.561173	-1.78198	3.2516	5.79429
EFEMP2	233.804	1.59935e-07	4.51536e-06	1.38704	1.38704	21.3846	15.4174
PHACTR2	39.1583	0.303996	0.438352	1.12874	1.12874	2.39379	2.12076
RGS5	5542.85	0.530628	0.654596	0.974663	-1.026	480.1	492.581
RPS2	16002.2	7.44044e-10	8.66288e-08	0.676488	-1.47822	1154.53	1706.65
ARMC9	632.386	2.3911e-06	3.88086e-05	1.2917	1.2917	54.2101	41.968
DDX5	9975.03	0.000157377	0.00110911	1.17326	1.17326	844.013	719.374
TMC6	86.9831	0.00757892	0.0247517	0.803776	-1.24413	7.6315	9.49456
CYP2U1	356.479	0.000252515	0.001622	0.819669	-1.22	29.1708	35.5885
PCDHB10	961.311	4.93205e-07	1.12797e-05	1.27767	1.27767	84.2467	65.9379
MAK16	586.039	3.41956e-09	2.64697e-07	0.705579	-1.41728	42.832	60.7048
TMEM192	316.895	0.228577	0.353207	0.950136	-1.05248	28.1544	29.632
ZBTB20	280.859	0.118349	0.213182	1.14213	1.14213	18.2157	15.9489
CACNA1C	216.813	0.285158	0.41747	0.941935	-1.06164	14.7426	15.6513
ANK1	284.758	1.48153e-06	2.67931e-05	1.40711	1.40711	24.0944	17.1233
RIT1	218.536	0.000926734	0.00458904	1.19494	1.19494	18.0053	15.068
PTDSS2	267.457	0.000118091	0.000884931	0.768337	-1.30151	21.4586	27.9286
AC092969.1	65.3433	0.0421851	0.0958709	1.20751	1.20751	4.71508	3.90478
CARMIL1	108.115	1.77978e-05	0.000193618	1.42454	1.42454	9.27843	6.51329
CCDC171	241.721	0.236357	0.36225	1.06165	1.06165	18.3328	17.2682
DYRK1A	1764.77	2.64079e-07	6.81383e-06	1.28234	1.28234	154.649	120.598
MORC4	124.789	2.77053e-06	4.36102e-05	0.694809	-1.43925	9.48937	13.6575
MANSC1	294.783	0.000490664	0.00278708	1.23649	1.23649	31.4031	25.3969
UGCG	488.431	0.0771118	0.153635	0.930163	-1.07508	42.1844	45.3517
ZCCHC12	44.7731	5.29606e-08	1.93794e-06	3.00364	3.00364	4.86138	1.6185
RAB4A	822.309	0.000410697	0.00241381	0.880628	-1.13555	68.0216	77.2422
AC138649.1	122.425	0.000236696	0.00153525	1.28595	1.28595	10.5803	8.22758
CDK13	1022.39	0.121202	0.217129	1.05169	1.05169	81.1886	77.1982
MIMT1	39.9152	0.513025	0.639318	0.941402	-1.06225	3.93247	4.17725
BTBD7	935.807	0.837355	0.896266	0.993389	-1.00665	68.0463	68.4991
CLMN	496.625	0.00196177	0.00832955	0.842804	-1.18652	41.0307	48.6835
ATP9A	4479.56	1.27475e-07	3.75705e-06	1.29162	1.29162	388.754	300.983
PEG3	1211.8	0.000925953	0.0045884	1.1843	1.1843	125.265	105.771
ZNF606	554.188	0.000434821	0.00253026	1.15632	1.15632	45.821	39.6264
WDR12	783.473	7.51393e-08	2.53438e-06	0.762918	-1.31076	59.9335	78.5582
AP005131.1	15.2127	0.30273	0.436973	1.21169	1.21169	0.961676	0.793663
AFDN	1665.29	0.000116728	0.00087658	1.15584	1.15584	140.003	121.127
POLE3	1011.15	5.56763e-06	7.68988e-05	0.833137	-1.20028	81.9164	98.3228
ACAT1	669.461	4.8261e-05	0.000430045	0.82409	-1.21346	54.5056	66.1403
NLE1	343.006	6.42705e-05	0.000545119	0.802857	-1.24555	27.5994	34.3765
ANTXR2	1499.88	3.78924e-08	1.48699e-06	1.40609	1.40609	137.472	97.7696
LTA4H	799.679	3.02222e-09	2.41139e-07	0.642983	-1.55525	55.8731	86.8967
ZNF85	577.355	0.00105278	0.00508278	1.16213	1.16213	47.5492	40.9154
NOP14	728.09	9.06154e-07	1.82892e-05	0.76847	-1.30129	57.2756	74.532
SYNGR2	153.893	0.802179	0.871832	0.983631	-1.01664	14.65	14.8938
EPC2	655.077	0.0031408	0.0121827	1.13384	1.13384	53.3617	47.063
EPB41L5	819.891	8.68113e-08	2.78881e-06	1.32708	1.32708	74.5673	56.1889
ROBO1	681.556	0.000820374	0.00416034	0.870272	-1.14907	47.0881	54.1073
POLR1D	594.593	3.61699e-07	8.74034e-06	0.771809	-1.29566	45.9324	59.5126
ILVBL	481.956	0.0917977	0.17596	0.935741	-1.06867	42.9556	45.9055
PTCH1	1030.45	0.829259	0.890578	0.992816	-1.00724	94.9192	95.606
DNPEP	188.823	0.000744007	0.00384081	0.807701	-1.23808	15.8563	19.6314
IKBKB	106.593	6.7558e-05	0.000566859	0.738292	-1.35448	6.04106	8.18248
TSC1	794.165	7.70379e-05	0.000628437	1.20657	1.20657	66.6	55.198
AAK1	550.796	5.35975e-06	7.44657e-05	1.44301	1.44301	45.4233	31.4782
FHDC1	43.6301	0.0904728	0.174089	1.26516	1.26516	2.77266	2.19155
PEX6	235.605	0.00276493	0.010954	0.853882	-1.17112	19.8243	23.2167
MAP2	3167.61	2.13314e-05	0.000224433	1.20601	1.20601	317.088	262.923
TLE1	468.911	0.560473	0.681625	1.02158	1.02158	35.5266	34.7762
PCDHB13	389.982	0.0138298	0.0397901	1.15475	1.15475	30.6481	26.5408
SIAH1	533.505	0.000399066	0.00236022	1.16541	1.16541	44.3768	38.0782
ARSJ	100.248	0.0145988	0.0414234	1.20966	1.20966	7.12542	5.89044
NTRK1	318.598	1.65435e-11	6.62605e-09	2.27601	2.27601	36.2934	15.9461
FAM124B	40.4622	0.000154778	0.00109602	1.91445	1.91445	3.26602	1.70599
H3-3A	6953.49	0.148319	0.252815	1.03881	1.03881	555.632	534.873
TMEM119	435.491	0.233186	0.358638	0.951289	-1.05121	31.3935	33.0011
FAM78B	170.394	0.0967709	0.1831	1.09385	1.09385	16.6048	15.1802
GNAQ	2420.04	1.37687e-07	3.99122e-06	1.30126	1.30126	212.327	163.17
TAB2	624.212	0.00584931	0.0201372	1.1094	1.1094	49.2353	44.3802
POLRMT	439.781	0.002115	0.0088246	0.842474	-1.18698	37.5022	44.5143
NPM3	199.72	4.37685e-06	6.3372e-05	0.698097	-1.43247	15.1449	21.6946
PLEKHG4B	41.414	0.00738131	0.0243019	1.3266	1.3266	3.39866	2.56194
AC092881.1	34.3258	0.517073	0.642885	1.09473	1.09473	2.10812	1.9257
PIGZ	40.3063	0.000901558	0.00449917	1.43765	1.43765	3.27827	2.28029
CNP	1688.14	6.37645e-06	8.61279e-05	1.22137	1.22137	147.335	120.631
PREX1	153.118	0.400434	0.535376	1.05023	1.05023	11.1548	10.6213
SVBP	129.934	0.000174976	0.00120127	1.33114	1.33114	11.1179	8.35218
ALDH1B1	1125.03	4.46293e-05	0.000404593	0.858747	-1.16449	92.5604	107.785
SLC19A2	278.472	1.04821e-05	0.000126756	0.773036	-1.2936	21.9258	28.3633
KCTD1	455.831	0.027774	0.0686215	1.09065	1.09065	35.9899	32.9986
CPLX2	2430.49	0.0106168	0.0321447	1.10698	1.10698	238.429	215.386
TMPO	6442.95	0.164808	0.274706	1.03939	1.03939	515.519	495.984
IFT57	288.759	0.0049489	0.0175883	1.13928	1.13928	29.2501	25.6742
ZNF425	79.0961	0.000415415	0.00243747	1.33806	1.33806	6.3726	4.76256
ZNF217	757.64	0.000949346	0.00466331	1.1352	1.1352	62.3593	54.9323
MEX3C	1872.9	0.801017	0.871004	0.993525	-1.00652	142.799	143.73
AC139272.1	52.9511	0.56662	0.686552	1.06489	1.06489	3.37113	3.16572
MAP4K3	502.484	0.000208856	0.00138725	1.17812	1.17812	41.7541	35.4414
PCDHGA7	134.163	0.00852653	0.0271769	1.29031	1.29031	10.3901	8.05237
CLIP3	169.064	1.10521e-05	0.000132175	1.41708	1.41708	14.3679	10.139
ARRB1	534.954	0.25062	0.378225	1.0497	1.0497	50.661	48.2623
NANS	337.739	0.0232461	0.0595655	0.901718	-1.10899	29.7565	32.9998
KLF15	44.3381	0.000110381	0.000835148	0.594164	-1.68304	3.446	5.79974
SH3BP2	451.438	1.11011e-05	0.000132536	1.29658	1.29658	38.821	29.9409
AGPAT5	2310.73	0.0010175	0.00494296	0.876849	-1.14045	192.596	219.646
APC2	1209.9	2.65813e-06	4.21709e-05	1.5307	1.5307	108.99	71.2027
CBR1	635.542	0.00117547	0.00553159	0.878296	-1.13857	53.7816	61.234
MIDN	404.183	0.0107566	0.0325051	1.15955	1.15955	32.1872	27.7583
BOP1	908.087	0.00365452	0.0137992	0.872532	-1.14609	78.2886	89.7257
DDX6	4719.42	0.000894603	0.0044708	1.1382	1.1382	390.173	342.799
ATP5MC1	625.999	3.1238e-08	1.29818e-06	0.720761	-1.38742	46.8749	65.0353
SNAP91	1353.63	1.03618e-05	0.00012541	1.19011	1.19011	132.451	111.293
SCN3A	1013.81	7.26172e-07	1.54303e-05	1.43908	1.43908	90.5472	62.92
FXYD6	1237.19	1.38605e-05	0.000160055	1.19977	1.19977	105.825	88.2043
FBXO32	68.2282	0.00153105	0.00683529	0.686158	-1.45739	5.76483	8.40161
RBM22	746.512	0.0400701	0.0919596	1.07919	1.07919	59.5278	55.16
PKD2	290.053	0.0403097	0.092444	1.1043	1.1043	22.7602	20.6106
MAP7D3	149.301	0.00977298	0.0301273	0.85569	-1.16865	13.2226	15.4526
ADAMTS10	161.214	0.000919702	0.00456385	1.2721	1.2721	13.3538	10.4974
PFKFB3	1343.14	3.1118e-07	7.72599e-06	0.767972	-1.30213	106.003	138.03
SEC24D	1219.87	0.537776	0.660983	1.02177	1.02177	110.606	108.248
TSPAN14	1044.84	5.22235e-07	1.17528e-05	1.27889	1.27889	92.5285	72.3509
CIART	83.3827	2.32901e-05	0.00024108	0.626947	-1.59503	6.28829	10.03
LINC00667	832.555	8.144e-06	0.000103572	1.21218	1.21218	71.7383	59.1814
BSN	535.269	0.00150671	0.00674705	1.1981	1.1981	42.1352	35.1684
FMOD	21.1552	0.325875	0.461307	0.863802	-1.15767	2.09648	2.42703
LRRC17	23.1265	0.105826	0.196374	1.36005	1.36005	1.40625	1.03397
SLCO4A1	56.0961	0.000637709	0.00340047	0.69509	-1.43866	4.55867	6.55839
PDE4D	295.868	0.0344406	0.0815323	1.09713	1.09713	23.0354	20.996
TSPAN5	702.5	0.259512	0.388656	0.96182	-1.0397	62.8841	65.3803
RUNDC3A	761.768	4.56193e-05	0.000411713	1.23388	1.23388	79.7016	64.5944
EP400	515.662	0.0272613	0.0675443	1.08817	1.08817	41.2252	37.8849
TP53BP1	2404.38	1.89452e-05	0.000203585	1.18336	1.18336	203.952	172.349
FGD6	182.886	0.628686	0.739821	1.02749	1.02749	13.5445	13.1822
CAMSAP2	1805.88	1.25119e-05	0.000147012	1.22838	1.22838	152.125	123.842
FRMD4B	951.046	0.0103891	0.0315912	0.898021	-1.11356	80.7669	89.9388
KCNK2	282.035	0.550433	0.673017	0.972697	-1.02807	20.1025	20.6668
RPL23A	7848.71	1.22509e-09	1.2816e-07	0.744967	-1.34234	587.267	788.313
SH3GLB1	1201.03	1.20691e-06	2.31018e-05	1.30749	1.30749	103.953	79.5062
TOX	361.942	0.000623116	0.00333782	1.18777	1.18777	36.625	30.8351
RNF152	825.643	1.444e-07	4.13931e-06	1.356	1.356	88.5427	65.2969
ASIC2	35.1418	1.66589e-05	0.000184505	2.42845	2.42845	5.99931	2.47042
PRDX1	1251.15	5.03902e-07	1.14315e-05	0.786273	-1.27182	98.574	125.369
PHKA1	214.978	2.67328e-07	6.88504e-06	0.683694	-1.46264	15.8596	23.1969
SMURF2	1388.92	0.0132723	0.0385925	1.08357	1.08357	111.841	103.215
RSRC1	900.349	0.938285	0.961839	1.00235	1.00235	69.0629	68.9006
PIH1D1	726.921	0.00114968	0.00544808	0.871978	-1.14682	61.574	70.6142
AC011447.7	45.5055	0.876736	0.92375	0.991546	-1.00853	2.75278	2.77625
EIF4G2	8494.29	1.71125e-06	2.99107e-05	1.19127	1.19127	728.755	611.746
KIDINS220	4718.17	2.20348e-09	1.9923e-07	1.43074	1.43074	439.505	307.187
ATP2B1	938.979	0.188263	0.304262	1.05534	1.05534	88.0391	83.4227
CUTA	954.798	0.000546553	0.00300833	0.869732	-1.14978	80.0272	92.0135
TMEM44	173.603	2.62298e-05	0.000264703	1.3782	1.3782	15.1664	11.0045
GSK3B	1600.84	3.02282e-05	0.000297177	1.20723	1.20723	135.587	112.313
NOA1	397.062	4.5122e-06	6.49978e-05	0.743055	-1.3458	30.6578	41.2591
FKRP	215.444	4.62863e-06	6.62011e-05	1.40996	1.40996	19.7871	14.0338
CLCN3P1	66.2712	0.00041221	0.00242068	1.43055	1.43055	5.43761	3.80105
CXCL12	35.5782	0.248383	0.375616	0.888616	-1.12535	3.41681	3.84509
MIF	3023.34	0.000194671	0.00130846	0.781744	-1.27919	249.155	318.718
FREM1	14.0233	0.354874	0.489856	1.18048	1.18048	0.740655	0.62742
AC100801.1	35.9037	0.00759739	0.0247989	1.46783	1.46783	2.56762	1.74927
DACT3	225.026	4.6672e-06	6.66438e-05	1.53153	1.53153	20.6161	13.4611
PNRC1	536.835	0.0148509	0.0419867	1.10563	1.10563	42.2021	38.1701
PCDHGA5	167.397	0.305691	0.439806	1.08493	1.08493	11.9482	11.0128
ARRDC4	190.84	3.56719e-05	0.000338643	0.766173	-1.30519	15.0274	19.6136
FSTL1	928.113	0.0817129	0.160845	1.07467	1.07467	72.5301	67.4908
RELB	72.4368	0.000110823	0.000837595	1.45591	1.45591	6.29444	4.32338
TNRC6A	1128.47	0.0043325	0.0158453	1.11207	1.11207	91.7717	82.5233
KIF5A	870.08	6.36696e-11	1.44674e-08	1.6274	1.6274	85.4047	52.4793
LINC00877	21.6478	6.4839e-06	8.71777e-05	2.12174	2.12174	2.08028	0.980457
CSRNP2	574.209	7.46361e-07	1.56702e-05	1.29831	1.29831	50.9011	39.2055
CRTAP	1288.79	4.38316e-05	0.00039813	0.842795	-1.18653	105.579	125.272
BACH2	551.319	2.58474e-07	6.70605e-06	1.48559	1.48559	49.8105	33.529
SH3GL3	140.498	5.32427e-06	7.40457e-05	0.711244	-1.40599	10.6403	14.9601
AC124045.1	51.495	0.0598117	0.125596	1.17766	1.17766	3.83267	3.25449
CRIP2	219.337	2.63545e-09	2.21709e-07	1.85211	1.85211	22.8883	12.358
AL390071.1	16.008	0.240974	0.367606	1.23389	1.23389	1.02417	0.830031
HAS3	30.7062	0.0107686	0.0325274	1.36269	1.36269	2.33864	1.71619
SLC30A1	194.928	0.000150464	0.0010723	0.753585	-1.32699	15.4428	20.4924
VANGL2	451.018	0.000481575	0.00274759	1.16669	1.16669	36.867	31.5997
RPL18A	7192.23	5.6845e-09	3.7422e-07	0.696843	-1.43504	527.745	757.338
N6AMT1	411.065	0.957484	0.973797	0.999195	-1.00081	30.848	30.8728
MESD	621.568	7.57376e-05	0.000620898	1.18956	1.18956	53.1032	44.641
AKR1C1	122.285	1.39753e-06	2.58378e-05	1.59076	1.59076	11.2313	7.06034
CCNL2	318.622	0.00927763	0.0289808	1.1671	1.1671	26.2046	22.4527
CACNG8	33.897	0.00220248	0.00910969	1.46158	1.46158	2.74904	1.88087
GCLC	571.909	0.000148952	0.0010652	0.845141	-1.18324	46.962	55.5671
IRS1	183.65	0.882314	0.927004	1.00598	1.00598	12.7127	12.6371
MAGI2-AS3	1638.24	0.00757888	0.0247517	1.09822	1.09822	133.944	121.965
IGFBP5	1775.51	0.00155824	0.00693381	1.32534	1.32534	134.261	101.303
NFIC	136.833	0.0142733	0.0407283	1.17852	1.17852	10.361	8.79151
STOX1	19.1508	0.00277584	0.0109879	1.65834	1.65834	1.50645	0.908411
AHSA1	1434.43	0.653896	0.760136	0.987727	-1.01243	127.078	128.657
NARS2	572.66	0.000726224	0.00376418	0.865534	-1.15536	47.4521	54.8241
SDC1	1018.31	0.0579703	0.12246	1.07876	1.07876	97.4057	90.2946
FAM222A	258.896	5.93262e-06	8.10657e-05	1.5168	1.5168	31.4446	20.7309
LTBP3	309.254	0.00133271	0.00610975	1.2695	1.2695	25.3358	19.9573
CTSF	247.091	2.50514e-06	4.03343e-05	0.709831	-1.40879	18.711	26.3598
UFC1	434.197	0.0852816	0.166038	1.06755	1.06755	34.8543	32.6487
BCL9	239.34	0.426977	0.560235	1.04202	1.04202	17.8508	17.131
ZNF720	244.727	3.89423e-05	0.000362364	1.3602	1.3602	21.3201	15.6743
HSD17B12	734.555	0.659406	0.764838	0.982866	-1.01743	65.942	67.0916
ZNF727	647.52	0.0323237	0.0775901	1.10809	1.10809	50.4045	45.4876
NRP2	3584.54	1.17464e-05	0.000139062	0.831052	-1.20329	285.95	344.082
SYNPO	429.737	3.07954e-06	4.75708e-05	1.3946	1.3946	37.9462	27.2095
GPR27	138.19	0.000154818	0.00109602	1.30083	1.30083	11.9799	9.20943
ENTPD4	1008.18	0.00034349	0.00207954	1.15564	1.15564	83.2962	72.0777
CAB39L	42.5305	0.0135248	0.0391246	1.31801	1.31801	3.08653	2.34182
ROR2	1338.55	0.0151421	0.0425793	1.11159	1.11159	108.036	97.1907
MAGI1	875.603	0.47924	0.609234	1.02243	1.02243	79.9627	78.2082
FAM210A	284.168	1.58806e-05	0.000178126	0.773384	-1.29302	22.2737	28.8004
ANKZF1	333.606	3.26828e-05	0.000317104	0.75938	-1.31686	26.7616	35.2414
PLEKHA6	875.671	7.09273e-12	4.34445e-09	1.60239	1.60239	100.849	62.9365
RSPRY1	1154.55	0.00461406	0.016659	1.10898	1.10898	109.314	98.5716
TBRG4	598.884	0.00142721	0.00645654	0.880322	-1.13595	50.4535	57.3125
ZC2HC1A	401.996	0.00740325	0.0243497	1.17041	1.17041	31.0133	26.4978
BIRC2	921.609	0.0182297	0.0491993	1.10498	1.10498	71.8559	65.0294
NUP43	743.146	0.0018176	0.00782353	0.855703	-1.16863	61.2847	71.6191
FAM168A	1645.85	6.9475e-09	4.38907e-07	1.40058	1.40058	153.251	109.42
SYNE3	62.731	0.00637035	0.0216515	1.25465	1.25465	6.9527	5.54154
DAAM2	157.899	7.38274e-10	8.66288e-08	0.519242	-1.92588	9.91127	19.088
PM20D2	870.163	2.39069e-05	0.0002462	0.830249	-1.20446	69.0112	83.1211
TSPAN2	128.56	0.0545556	0.117126	1.17648	1.17648	9.77243	8.30653
FBXL3	453.323	0.000377774	0.00225607	1.18564	1.18564	38.1509	32.1773
FAM102B	830.254	4.59743e-06	6.58887e-05	1.23223	1.23223	69.9354	56.7553
FRAT2	107.495	0.000887515	0.00444168	0.791962	-1.26269	9.05129	11.4289
ODC1	2657.78	1.76773e-09	1.6714e-07	0.740454	-1.35052	198.27	267.768
LMBR1L	218.895	2.66906e-05	0.000268392	1.35797	1.35797	19.0439	14.0238
CDH8	152.73	0.72192	0.813307	1.01732	1.01732	11.4886	11.293
HMGA1	2609.64	0.000162376	0.00113726	0.822833	-1.21531	215.799	262.263
SLC25A53	73.5694	0.790216	0.864531	0.978035	-1.02246	4.79127	4.89887
C16orf72	2308.11	1.36102e-05	0.000157941	1.20631	1.20631	195.78	162.297
FARSB	806.009	1.03512e-07	3.23342e-06	0.739482	-1.3523	59.8072	80.8772
APAF1	650.684	0.0139056	0.0399392	1.09518	1.09518	52.5268	47.9618
DPYD	90.2131	0.430805	0.563893	0.947137	-1.05581	8.25216	8.71274
EPHA2	125.877	0.000112783	0.000849338	0.690294	-1.44866	9.75942	14.1381
KLC1	2593.73	4.32623e-10	5.7498e-08	1.42502	1.42502	247.824	173.909
ZNF561	461.466	0.10977	0.201832	1.06333	1.06333	36.5393	34.363
CCNE2	195.851	0.0400769	0.0919596	1.12493	1.12493	15.1308	13.4504
ZNF675	423.069	0.00863929	0.027437	1.15891	1.15891	33.4361	28.8513
PRRT2	80.2579	0.00553166	0.0192372	1.28805	1.28805	6.54677	5.08268
FAM215B	70.7705	0.00262293	0.0104947	1.34367	1.34367	5.59225	4.16191
HOXD10	670.224	6.77225e-05	0.000567901	1.17888	1.17888	55.9658	47.4735
ZNF587	307.509	0.353032	0.488006	1.04233	1.04233	22.5701	21.6534
GPR173	268.855	0.0149219	0.0421197	1.12899	1.12899	21.8268	19.3331
KIAA1671	56.2851	0.963029	0.976686	0.995474	-1.00455	5.26614	5.29009
DCAF7	5818.65	0.00899302	0.0282811	1.09167	1.09167	541.256	495.805
PSMG1	381.686	5.9175e-07	1.30667e-05	0.73986	-1.35161	29.1725	39.4298
FBXW8	325.121	0.00205706	0.00865589	0.854907	-1.16972	27.0177	31.6031
GTF2A1	1549.27	9.8505e-05	0.000762075	1.18377	1.18377	129.971	109.794
DTNBP1	103.415	0.829128	0.890543	0.983842	-1.01642	7.46194	7.58449
ABHD2	1547.36	3.32008e-08	1.37046e-06	1.31871	1.31871	161.402	122.394
GPR161	1553.28	1.13627e-06	2.20492e-05	1.2506	1.2506	134.777	107.77
PCBD2	227.095	7.97349e-05	0.000646893	1.27405	1.27405	19.4984	15.3042
SGCB	1835.2	3.73918e-05	0.000352201	1.17599	1.17599	154.732	131.576
TXNRD1	2868.18	6.33659e-07	1.38403e-05	0.810377	-1.23399	225.223	277.924
SGTB	687.744	0.0304196	0.0738397	1.08097	1.08097	63.8527	59.0698
RPL12	6762.2	2.89176e-11	9.47421e-09	0.64724	-1.54502	463.765	716.527
PLCG1	2389.4	0.0101593	0.03106	1.09385	1.09385	197.872	180.894
ZBED5	857.038	0.00575602	0.0198784	1.11438	1.11438	70.1489	62.9489
NFKBIA	286.529	0.000265062	0.0016851	1.20938	1.20938	24.3428	20.1282
INO80D	323.371	0.000133348	0.000973873	1.32101	1.32101	26.6895	20.2039
ZNF253	632.526	0.744683	0.830465	0.986924	-1.01325	46.3129	46.9265
NLGN4Y	649.803	0.0770532	0.153561	1.074	1.074	49.7196	46.2939
NT5DC3	205.634	3.06942e-07	7.65345e-06	0.634866	-1.57514	14.7405	23.2183
TRIB3	170.417	0.199812	0.318902	1.07521	1.07521	16.9986	15.8095
MYBBP1A	535.37	2.9822e-07	7.48899e-06	0.689662	-1.44999	39.52	57.3034
MTMR3	589.347	1.55707e-07	4.42258e-06	1.33049	1.33049	53.2452	40.0193
ITPR1	996.17	0.813411	0.879728	0.989432	-1.01068	92.0973	93.081
RAB8B	581.838	0.668787	0.772095	1.02112	1.02112	43.055	42.1644
RCOR1	701.316	0.29373	0.427398	1.04132	1.04132	54.6992	52.5286
EEF2	27393.2	2.87051e-05	0.000285389	0.791809	-1.26293	2175.68	2747.73
ZNF184	439.029	0.054053	0.116313	1.08295	1.08295	34.0828	31.4723
LRFN2	62.4972	0.0428598	0.0971223	0.811917	-1.23165	5.63009	6.93432
TMSB15B	398.234	0.00123684	0.00576208	1.16452	1.16452	33.191	28.5019
SKIL	1093.13	0.000205273	0.00137056	1.21251	1.21251	89.765	74.0327
HSPE1	1330.46	2.08572e-08	9.86029e-07	0.696335	-1.43609	97.1052	139.452
LINC01578	941.82	6.03782e-05	0.000515208	1.17667	1.17667	79.4493	67.5206
HOMER3	237.317	0.011784	0.0350461	1.15812	1.15812	19.5962	16.9207
PSD2	57.6667	1.61036e-06	2.86088e-05	1.72602	1.72602	5.31121	3.07714
ZNF624	165.922	0.000151993	0.00107873	1.3267	1.3267	13.9869	10.5426
PNMA2	2700.71	0.279807	0.411346	1.02916	1.02916	241.922	235.067
SOCS3	51.1908	0.0573882	0.121626	1.1879	1.1879	3.81719	3.21338
GOT2	2117.85	0.000681769	0.00358253	0.874827	-1.14308	176.208	201.42
HPS3	521.009	0.00485308	0.0173264	1.14983	1.14983	52.331	45.5121
PARP4	516.064	0.101174	0.189793	1.06018	1.06018	48.1862	45.4508
NCAPD2	2591.32	0.000132345	0.000969737	0.871554	-1.14738	212.331	243.624
COL4A2	3091.42	0.219177	0.341832	0.92173	-1.08492	205.279	222.711
STX18-AS1	130.914	0.500304	0.62875	0.960477	-1.04115	9.12043	9.49573
SMIM8	282.49	0.0514135	0.11195	0.901992	-1.10866	24.6284	27.3044
CAMK2D	789.824	0.00234928	0.00960439	1.10408	1.10408	63.1542	57.2005
ZNF772	745.963	0.000251122	0.0016147	1.18249	1.18249	62.0831	52.502
LINC00894	14.901	0.0306582	0.0742756	1.62565	1.62565	1.07239	0.65967
RAPGEF4	147.933	1.5776e-08	7.99471e-07	1.59574	1.59574	17.8074	11.1594
C11orf95	1079.06	8.93291e-06	0.000111369	1.31254	1.31254	94.3548	71.8874
C20orf204	49.7382	0.0205522	0.0540893	1.27223	1.27223	4.04506	3.17951
PCAT7	418.129	0.00279156	0.0110408	1.14265	1.14265	41.19	36.0477
RHBDF2	35.4507	0.0130684	0.0381097	0.718479	-1.39183	2.96341	4.12456
EPHB3	201.185	0.000658639	0.003487	1.24642	1.24642	16.5968	13.3155
CELF5	335.158	1.92375e-07	5.22776e-06	1.42647	1.42647	30.3611	21.2841
ETFB	469.138	0.00278519	0.0110218	1.1825	1.1825	38.0087	32.1428
ADAMTS9	5361.34	1.3218e-11	6.00694e-09	1.58326	1.58326	601.48	379.899
ATIC	532.892	0.00182903	0.00785982	0.868169	-1.15185	44.7324	51.5249
ZNF136	434.14	0.00116716	0.00550626	1.16238	1.16238	35.7976	30.7968
FKBP4	3131.42	6.8189e-06	9.03451e-05	0.855386	-1.16906	257.649	301.208
RNF34	511.441	0.00546416	0.0190213	1.11588	1.11588	48.8984	43.8205
RPL35	5346.32	2.27667e-09	1.9923e-07	0.71171	-1.40507	390.274	548.361
AC022424.1	22.9054	0.0943424	0.179449	1.3313	1.3313	2.82172	2.11952
TUBG2	111.6	0.0141838	0.0405338	1.15585	1.15585	8.87441	7.67779
KIF13A	563.36	2.07799e-05	0.000219945	1.22902	1.22902	47.6841	38.7984
NAP1L1	7010.28	8.71007e-08	2.78881e-06	0.753649	-1.32688	529.665	702.8
OAZ1	2677.61	0.334564	0.470159	1.0337	1.0337	245.809	237.795
ZNF107	428.903	0.535122	0.658756	0.969216	-1.03176	30.24	31.2004
SEPHS1	1798.57	0.00592572	0.0203514	1.10302	1.10302	148.059	134.23
NDUFV1	1323.95	0.00119417	0.00560408	0.877555	-1.13953	110.148	125.517
TFAP2B	948.566	4.47258e-07	1.04295e-05	1.24265	1.24265	95.3142	76.7026
AF235103.3	13.836	0.0724413	0.146391	1.37002	1.37002	0.909211	0.663646
KATNB1	418.231	3.06682e-05	0.000300873	0.790204	-1.2655	33.601	42.5219
DR1	1253.48	0.153874	0.260143	1.05022	1.05022	98.5594	93.8463
CD248	223.768	0.0133479	0.0387229	1.22452	1.22452	18.3955	15.0226
TLX2	1334.71	0.241408	0.36803	1.0896	1.0896	100.18	91.9418
HTR5A-AS1	19.7881	8.5078e-06	0.000107592	0.306967	-3.25768	1.11623	3.63631
SON	2366.07	0.00703653	0.0234241	1.10057	1.10057	190.772	173.34
TUBB2B	8452.01	2.99921e-05	0.000295888	1.21348	1.21348	727.706	599.687
RPS4Y1	3054.1	2.76148e-11	9.30895e-09	0.685143	-1.45955	214.833	313.56
BTF3	5490.69	1.26005e-07	3.72932e-06	0.797459	-1.25398	427.26	535.777
C12orf66	69.1899	2.91365e-05	0.000288864	0.657727	-1.52039	5.18096	7.87706
RAB15	137.918	4.80141e-08	1.78006e-06	1.74077	1.74077	13.7114	7.87661
CC2D2A	301.801	0.232938	0.358374	0.952961	-1.04936	22.3527	23.4561
RPS28	1126.85	2.15911e-06	3.59089e-05	0.757258	-1.32055	87.4879	115.532
PTOV1	1776.8	0.0511795	0.111537	1.06433	1.06433	144.796	136.044
TBC1D9B	1358.76	0.602287	0.717974	1.01879	1.01879	123.018	120.749
MAPKAPK2	528.392	5.75632e-07	1.27508e-05	1.32484	1.32484	47.7194	36.0189
E2F8	105.119	0.000243746	0.00157446	1.35983	1.35983	8.7338	6.4227
ARHGEF26	86.2581	0.474866	0.605202	0.95135	-1.05114	8.20733	8.62704
TRIM25	655.231	0.000634793	0.00338877	0.871549	-1.14738	54.0255	61.9879
CD320	291.694	0.000187359	0.00126899	0.801131	-1.24824	23.8195	29.7323
P4HA2	243.617	0.43115	0.564187	1.03523	1.03523	23.3771	22.5816
INTS7	781.507	0.000302893	0.00188146	1.15084	1.15084	66.947	58.1722
MACF1	2687.73	0.000150152	0.00107161	1.19728	1.19728	223.547	186.712
AGO4	272.908	0.477602	0.607755	1.03243	1.03243	20.5573	19.9115
NSG2	5046.75	1.04938e-06	2.06189e-05	1.23145	1.23145	501.865	407.541
NOC3L	497.677	6.03468e-08	2.14688e-06	0.727082	-1.37536	36.924	50.7838
GPD1L	419.811	3.60463e-06	5.46631e-05	0.791132	-1.26401	32.2673	40.7862
UGP2	432.376	3.22098e-06	4.95925e-05	1.30189	1.30189	38.5485	29.6097
GFRA3	14.2656	0.102341	0.191523	1.3063	1.3063	0.96904	0.741823
RPL41	8098.99	8.87773e-11	1.83926e-08	0.665023	-1.50371	561.529	844.376
CXXC4	221.685	0.016219	0.0448739	0.846477	-1.18137	13.5404	15.9962
POMZP3	69.1573	0.000681204	0.0035809	1.38246	1.38246	5.89042	4.26081
DARS1	1750.98	1.05253e-06	2.06519e-05	0.784075	-1.27539	136.702	174.349
DIPK2A	241.8	0.000150742	0.00107276	0.791802	-1.26294	19.5626	24.7065
TMEM161B-AS1	228.065	0.951651	0.970442	0.995937	-1.00408	16.0721	16.1377
DUSP4	2851.87	4.60684e-08	1.72085e-06	1.37726	1.37726	259.536	188.444
PGAM5	606.867	0.000169196	0.00117075	0.842249	-1.1873	49.6948	59.0025
TCTN3	316.53	0.000399244	0.00236028	0.851533	-1.17435	26.0081	30.5426
GREM1	813.088	5.66074e-07	1.25864e-05	1.34364	1.34364	85.8358	63.8828
NISCH	1374.9	1.4756e-06	2.67545e-05	1.23275	1.23275	120.091	97.4168
SLC39A11	194.257	0.790209	0.864531	0.986235	-1.01396	13.9826	14.1777
EIF4G3	662.364	0.0860446	0.167223	1.06615	1.06615	52.8148	49.5378
PLEKHA7	58.1216	0.0176472	0.0479672	1.30285	1.30285	4.54169	3.48596
USP40	326.151	0.431056	0.564117	1.03179	1.03179	25.4147	24.6317
ZNF581	158.117	5.89537e-05	0.00050568	0.738589	-1.35393	12.5242	16.957
VPS45	509.518	0.000405609	0.00239091	1.18124	1.18124	42.9131	36.3288
AL096711.2	3719.13	3.44185e-05	0.000329856	1.23194	1.23194	313.584	254.544
COL18A1	36.4146	0.143293	0.245975	1.17619	1.17619	2.35368	2.0011
ARRDC3	1373.2	4.13872e-06	6.04836e-05	1.2284	1.2284	118.761	96.6791
TBC1D24	300.417	0.000300697	0.00187195	1.21907	1.21907	25.6461	21.0374
GATA2	2087.96	4.56312e-07	1.05732e-05	1.3903	1.3903	183.829	132.222
WNK1	1199.66	0.150368	0.255351	1.057	1.057	92.6855	87.6872
ZFAND6	735.747	0.0300364	0.0730834	1.0836	1.0836	60.2375	55.5904
HS6ST2	687.956	0.181576	0.296012	0.941149	-1.06253	49.8914	53.0112
ARNT	567.398	0.000146724	0.0010514	1.158	1.158	47.882	41.3488
ZNF426	745.102	0.433902	0.566718	0.973297	-1.02744	56.4042	57.9517
TRAM2	114.954	0.00569427	0.0196945	1.22835	1.22835	9.30454	7.57483
RPL13A	17264.3	2.90374e-08	1.23821e-06	0.743584	-1.34484	1301.35	1750.1
MARF1	592.429	0.010098	0.0308958	1.10783	1.10783	48.3524	43.6458
TGFB1I1	266.543	6.61815e-07	1.43662e-05	1.48288	1.48288	24.9524	16.8269
LRRC37A	91.4632	0.023972	0.0610876	1.20504	1.20504	7.01834	5.82415
CHROMR	291.81	0.040552	0.0928333	1.11898	1.11898	22.6791	20.2677
REEP1	402.133	8.60338e-08	2.78881e-06	1.5038	1.5038	37.2845	24.7935
RPS6	14916.6	4.50965e-10	5.93756e-08	0.658282	-1.51911	1044.6	1586.86
ANAPC1	1264.38	1.77448e-05	0.000193484	0.846251	-1.18168	102.105	120.656
STOML2	1034.26	2.78425e-05	0.000278188	0.830863	-1.20357	84.0687	101.182
CLIP2	1130.91	5.21575e-07	1.17528e-05	1.36689	1.36689	100.054	73.1985
RHOU	706.266	0.565193	0.685236	0.961624	-1.03991	48.0378	49.9548
SLC39A8	153.555	4.23751e-06	6.16715e-05	0.701081	-1.42637	11.7144	16.709
ARHGEF7	1128.99	7.43079e-05	0.000611478	1.16588	1.16588	96.3582	82.6487
ZNF252P	626.799	0.000611828	0.0032861	1.16986	1.16986	52.3749	44.7701
RPL3	12218.8	1.39239e-09	1.39121e-07	0.717152	-1.39441	898.379	1252.7
PLXNA1	1164.69	0.345169	0.480555	1.03631	1.03631	89.8065	86.6598
PCDHGB3	221.558	0.195792	0.313874	1.12078	1.12078	16.1494	14.4091
EFR3B	802.94	4.08092e-08	1.55384e-06	1.40775	1.40775	73.4463	52.1729
IARS1	4163.65	7.90495e-10	9.12828e-08	0.75216	-1.3295	311.922	414.702
ELP2	1492.74	5.88712e-08	2.09969e-06	0.776898	-1.28717	112.59	144.923
ZBTB4	242.145	8.65675e-06	0.00010889	1.30674	1.30674	20.9133	16.0042
ZNF776	561.538	0.00131691	0.00605109	1.15228	1.15228	45.5971	39.5711
DYRK1B	114.242	4.11246e-05	0.000378421	1.48287	1.48287	10.1045	6.81415
CBX8	446.565	0.00062761	0.00335933	1.1714	1.1714	37.5933	32.0926
ZNF486	505.369	0.976041	0.984778	0.999389	-1.00061	37.8549	37.878
HERC2P3	252.1	0.1127	0.205636	1.07704	1.07704	19.6619	18.2555
CYLD	608.996	3.93587e-07	9.38215e-06	1.33345	1.33345	54.1066	40.5765
KYAT3	539.122	0.507908	0.635302	0.974223	-1.02646	40.0264	41.0855
PROX1	566.593	0.478131	0.608263	0.963157	-1.03825	49.6073	51.5049
PAK3	370.205	6.39594e-07	1.39483e-05	1.33313	1.33313	32.4065	24.3086
UGT3A2	61.2165	1.98512e-06	3.37345e-05	1.88161	1.88161	9.06994	4.82031
ARMCX4	219.198	0.00235641	0.00962792	1.18711	1.18711	18.5787	15.6504
MAP3K12	379.104	7.46267e-07	1.56702e-05	1.33984	1.33984	34.4407	25.705
AL137003.1	14.9475	0.00361653	0.0136925	1.90782	1.90782	1.01131	0.530088
FIP1L1	1206.77	0.187125	0.30292	1.04479	1.04479	95.5732	91.4759
KLHL7	998.925	0.0212286	0.0555271	1.10193	1.10193	80.1949	72.777
CGREF1	226.83	0.00320395	0.0124004	0.839218	-1.19159	18.9547	22.5861
LINC00641	472.22	0.00784847	0.0253948	1.14502	1.14502	37.7455	32.965
UTP25	512.805	4.60175e-09	3.20938e-07	0.694818	-1.43923	36.6258	52.7127
BCAP31	1256.93	0.014272	0.0407283	1.09043	1.09043	118.964	109.099
PCDHB6	44.2619	0.000495764	0.00280946	1.50103	1.50103	3.66869	2.44411
PTBP2	823.86	0.000110649	0.000836724	1.19414	1.19414	71.3447	59.7456
STK32A	84.1255	0.267479	0.397705	1.07958	1.07958	6.21815	5.75979
INSC	17.9325	0.869633	0.91936	0.976998	-1.02354	2.05753	2.10597
RRP1B	1529.83	1.59865e-08	8.0611e-07	0.763403	-1.30992	114.766	150.335
ZNF25	390.024	0.00504452	0.0178606	1.14691	1.14691	30.9892	27.0197
ZNF177	83.2406	0.0308522	0.07463	1.23134	1.23134	6.50587	5.28356
CYFIP1	1975.15	0.00958909	0.0296838	0.915587	-1.0922	167.242	182.661
PHF12	353.439	0.00114503	0.0054332	1.16647	1.16647	29.4869	25.2787
ZNRF1	365.574	9.02132e-05	0.000713037	1.2807	1.2807	31.3611	24.4876
ID1	140.858	0.254463	0.382672	1.13969	1.13969	8.98491	7.88367
EFNB2	518.265	1.25504e-09	1.29058e-07	1.90709	1.90709	68.5987	35.9704
SHISA2	17.9508	1.74817e-06	3.04051e-05	3.87718	3.87718	1.78606	0.460659
MAPK11	284.898	3.61433e-08	1.43516e-06	1.62018	1.62018	27.5067	16.9775
RPL32	9041.85	4.48233e-11	1.21437e-08	0.687219	-1.45514	631.84	919.415
RAB9B	125.465	8.78597e-05	0.000697727	1.30945	1.30945	10.9309	8.34772
SCUBE3	62.2758	0.000165416	0.00115308	1.42816	1.42816	5.39912	3.78046
SLC25A32	394.052	0.000200207	0.00134182	0.830904	-1.20351	31.9782	38.486
GHDC	143.96	0.0222383	0.0576119	0.858177	-1.16526	12.2558	14.2811
PLEKHA5	288.778	0.000688016	0.00360862	1.19508	1.19508	24.0143	20.0943
ARHGAP32	490.174	0.0625399	0.130161	1.0891	1.0891	38.5357	35.3831
HSPA12A	293.769	0.639628	0.748615	1.02689	1.02689	27.542	26.8208
URB2	572.766	3.7856e-08	1.48699e-06	0.738468	-1.35415	42.307	57.2902
VARS1	1607.66	1.25486e-05	0.000147321	0.762216	-1.31196	125.975	165.274
FAM216A	468.898	0.000164411	0.00114835	0.825292	-1.21169	38.9071	47.1434
TBC1D8	184.843	0.955731	0.972646	0.99779	-1.00221	17.3987	17.4373
ZNF518A	591.947	0.0998827	0.188026	1.08481	1.08481	45.5377	41.9775
ARHGAP33	99.8138	4.14173e-05	0.000380618	1.43701	1.43701	8.84503	6.15518
KCNMB4	476.591	0.000487814	0.00277431	1.22113	1.22113	38.4048	31.4504
NAMPT	991.712	3.7795e-05	0.000354498	0.801687	-1.24737	79.2845	98.8971
CCDC50	1423.26	0.000865052	0.00434469	1.14406	1.14406	117.053	102.314
AP002414.2	34.7455	0.955558	0.97261	0.976417	-1.02415	2.086	2.13638
GABBR1	266.51	1.2446e-12	2.40936e-09	2.05867	2.05867	29.8166	14.4834
CARS2	434.15	0.942508	0.964544	0.997339	-1.00267	39.5362	39.6417
GAPDH	34976.2	0.00249293	0.0100718	0.898228	-1.1133	2981.69	3319.52
CAMK2B	182.042	0.00304936	0.0119067	1.20104	1.20104	18.9217	15.7544
TEAD1	2840.11	0.074497	0.149656	1.06439	1.06439	219.702	206.411
CASTOR2	1412.03	6.20591e-08	2.18027e-06	1.33705	1.33705	128.446	96.0666
TMEM120A	112.523	0.438602	0.571302	0.952298	-1.05009	10.7647	11.3039
SAMD9	45.9847	7.33642e-09	4.57325e-07	2.73724	2.73724	5.05119	1.84536
COMT	254.965	0.000166941	0.00116199	0.824286	-1.21317	20.4525	24.8124
WDFY1	624.549	0.00190085	0.00812475	1.12726	1.12726	51.4076	45.6039
ZSCAN9	420.946	0.00099947	0.00487047	1.20048	1.20048	35.0651	29.2093
NLGN2	273.975	0.0168522	0.0461624	1.17099	1.17099	22.1258	18.895
PTK7	1639.06	0.368604	0.503926	0.972132	-1.02867	144.282	148.418
TUG1	3539.31	0.000569544	0.00309968	1.13254	1.13254	295.097	260.562
SLC4A2	971.342	0.199889	0.318953	1.04925	1.04925	89.5253	85.3231
NDNF	241.91	0.202534	0.321607	1.0803	1.0803	18.3393	16.9761
CADM1	5433.37	1.02434e-07	3.20687e-06	1.31086	1.31086	569.495	434.443
LRRC37A3	72.1344	0.00235285	0.00961618	1.35391	1.35391	5.66236	4.18222
PLEKHG5	69.9062	7.54194e-07	1.58111e-05	1.8794	1.8794	6.81964	3.62862
RGS9	46.5519	0.000137798	0.00100015	1.68096	1.68096	6.37332	3.79148
TAF13	161.287	0.000500988	0.00283289	1.26911	1.26911	13.6165	10.7292
CNTFR	282.443	0.189317	0.30558	1.07134	1.07134	21.5326	20.0988
ZNF397	606.931	0.325441	0.460983	0.96066	-1.04095	45.4847	47.3473
RPL36	3950.85	1.45472e-09	1.43316e-07	0.695046	-1.43875	282.806	406.888
TAFA5	538.465	0.666233	0.769461	0.984672	-1.01557	41.3751	42.0191
C1QL4	145.463	2.51236e-05	0.000255737	1.45758	1.45758	16.7702	11.5055
PRDM5	448.207	0.0148142	0.0419129	1.11645	1.11645	36.0235	32.2662
COL9A1	26.2625	0.324363	0.459953	0.870782	-1.14839	2.57874	2.96141
IL12A	25.3528	0.632935	0.743255	0.927973	-1.07762	2.83597	3.05609
PCDHB2	795.889	0.000965006	0.0047287	1.1968	1.1968	65.6837	54.8827
RPS8	5960.62	6.71979e-10	8.09132e-08	0.68059	-1.46931	422.338	620.546
ODAM	30.3575	0.000304677	0.00189088	1.83389	1.83389	4.46668	2.43564
NINL	530	0.0240323	0.0612015	1.09287	1.09287	43.0417	39.3841
PEBP1	4411.64	0.000630512	0.00336975	0.900998	-1.10988	365.402	405.553
NHP2	847.728	2.95821e-07	7.45533e-06	0.77728	-1.28654	65.8623	84.7343
MAB21L2	6618.35	0.0171327	0.0468125	1.073	1.073	541.12	504.304
RANBP17	286.452	0.326414	0.461893	1.04792	1.04792	22.681	21.6438
SV2C	1973.44	6.70921e-11	1.47686e-08	1.58309	1.58309	225.887	142.687
JAKMIP2	792.865	0.000170159	0.00117568	1.16219	1.16219	66.2018	56.9629
TCAF1	2730.66	4.21339e-08	1.59137e-06	1.38822	1.38822	253.581	182.667
SLC25A33	186.922	0.00934341	0.0291345	0.879602	-1.13688	15.8153	17.98
GAGE2A	30.9159	2.7995e-06	4.38703e-05	0.464888	-2.15106	1.89351	4.07304
NOP53	1675.4	7.3061e-06	9.51279e-05	0.795502	-1.25707	132.847	166.998
AC092329.4	163.46	0.0287277	0.070459	1.12679	1.12679	12.9913	11.5295
NEFH	890.487	0.0087766	0.0277643	0.889393	-1.12436	76.7601	86.3062
DCTPP1	499.049	1.33745e-06	2.50558e-05	0.737902	-1.35519	37.6653	51.0437
BCAT1	5162.43	7.62401e-08	2.55731e-06	0.735522	-1.35958	388.528	528.235
ZFYVE26	340.85	0.129396	0.22765	1.0582	1.0582	26.9921	25.5075
ARMCX3	822.941	1.34092e-08	7.10181e-07	1.37171	1.37171	77.0412	56.1642
KCNMA1	101.821	0.619548	0.732902	0.953909	-1.04832	6.70011	7.02385
SLC25A26	127.05	7.43734e-06	9.65688e-05	0.702704	-1.42307	9.57329	13.6235
TUT4	1363.32	0.206447	0.326093	1.0435	1.0435	108.005	103.502
MACO1	610.781	3.19225e-05	0.000311013	1.19427	1.19427	52.0463	43.58
CCDC18-AS1	35.8513	0.0479398	0.106024	1.3036	1.3036	2.80242	2.14976
SHC2	340.104	9.70038e-07	1.93905e-05	1.41903	1.41903	30.8894	21.7679
PGBD2	113.299	0.000668516	0.00353001	1.30528	1.30528	9.82413	7.52648
TMEM151B	1629.48	1.5647e-09	1.52024e-07	1.80072	1.80072	207.999	115.509
PJA2	3047.49	2.29198e-06	3.75203e-05	1.24213	1.24213	262.984	211.72
RTN4	3516.76	9.80693e-09	5.5486e-07	1.33105	1.33105	321.688	241.68
AC019257.8	57.5851	0.000606938	0.00326637	1.49269	1.49269	5.18287	3.47217
TRUB2	569.177	0.000100378	0.000771901	0.833521	-1.19973	46.7013	56.0289
SQLE	2461.48	0.269094	0.399693	1.03184	1.03184	223.251	216.363
PDSS1	130.731	0.00110997	0.00530257	0.811134	-1.23284	10.7452	13.2471
CARHSP1	1362.5	5.01038e-07	1.13849e-05	1.25085	1.25085	121.948	97.4921
KBTBD7	508.168	0.561648	0.682288	1.02048	1.02048	39.7288	38.9315
MAPKAPK3	254.852	1.89459e-06	3.24313e-05	0.700933	-1.42667	19.1983	27.3896
AMPD2	365.661	0.00293842	0.011531	0.847916	-1.17936	30.8318	36.3618
PRPH	500.415	3.52872e-08	1.41631e-06	1.47538	1.47538	55.8332	37.8432
HMOX2	442.167	0.236809	0.362713	1.0423	1.0423	40.8897	39.2302
ELOVL2	372.562	0.0281726	0.0694085	1.10464	1.10464	30.3294	27.4564
RBM23	943.321	0.00241736	0.00981719	1.11362	1.11362	78.4786	70.4716
BMPER	46.755	2.50875e-09	2.15508e-07	2.94989	2.94989	7.70052	2.61044
XIAP	914.21	3.85901e-06	5.75909e-05	1.22748	1.22748	79.0012	64.3603
RAB5B	681.209	3.39462e-06	5.18693e-05	1.23053	1.23053	59.0651	47.9996
FAM184A	435.258	0.0455554	0.101854	0.92324	-1.08314	36.6701	39.7189
TLE2	22.7901	0.00430465	0.0157639	1.54072	1.54072	1.76052	1.14266
DMAC1	396.326	0.00177334	0.00767049	0.854155	-1.17075	33.219	38.8911
ZNF626	125.475	0.982054	0.988614	1.00316	1.00316	8.986	8.95766
NAIP	245.476	0.986341	0.991337	0.99949	-1.00051	17.4478	17.4567
TSPAN4	183.876	0.101661	0.190502	0.913042	-1.09524	15.9458	17.4645
AJAP1	204.562	3.97735e-07	9.46501e-06	1.44211	1.44211	22.1655	15.3701
ADAM22	1259.6	6.62558e-06	8.86071e-05	1.25462	1.25462	110.95	88.4332
JAK1	1847.22	4.85959e-10	6.2238e-08	1.49815	1.49815	209.492	139.834
PLK1	746.241	0.00667619	0.0224323	0.896035	-1.11603	63.5944	70.9731
CANX	11199.6	0.856701	0.909716	1.0052	1.0052	1005.39	1000.19
GALNT14	162.901	8.59139e-05	0.000686142	0.772156	-1.29508	13.5442	17.5408
KCTD15	756.9	0.00184909	0.00793724	1.13208	1.13208	63.8871	56.4335
PHETA1	147.038	0.00013491	0.000983752	1.3577	1.3577	12.8895	9.49365
RNPC3	146.236	0.446717	0.578805	1.04311	1.04311	11.1196	10.66
PIN4	288.104	0.0122568	0.0361318	1.11982	1.11982	24.03	21.4588
ABI2	2811.14	0.228338	0.35295	1.03617	1.03617	223.852	216.038
CNBP	3633.25	3.8371e-06	5.73246e-05	0.828728	-1.20667	290.153	350.119
ANAPC13	466.19	0.393319	0.528365	1.03314	1.03314	36.7141	35.5366
SFXN5	100.384	4.72349e-05	0.000423581	1.365	1.365	8.90992	6.5274
TIA1	1534.92	0.0122691	0.0361605	1.12411	1.12411	125.71	111.83
DRAXIN	18.0578	0.135368	0.235441	1.35642	1.35642	1.13446	0.836364
RANGRF	170.474	0.314233	0.449012	0.953075	-1.04924	15.1978	15.9461
YPEL5	276.578	9.46114e-06	0.000116613	1.36584	1.36584	24.1246	17.6628
CACFD1	273.449	9.38714e-08	2.97851e-06	1.45675	1.45675	25.4353	17.4603
HECTD4	1538.55	8.91734e-05	0.000706169	1.22131	1.22131	127.373	104.292
MAPK8	1798.49	1.68271e-05	0.000185639	1.18097	1.18097	156.603	132.605
STK39	1282.75	0.0570434	0.121081	1.07374	1.07374	102.728	95.6733
ZNF48	612.601	0.000718833	0.00373687	1.17763	1.17763	51.1524	43.4367
MAPK14	805.453	0.644652	0.752369	0.985289	-1.01493	62.2321	63.1612
RASA4	167.367	0.0010179	0.00494321	1.30051	1.30051	13.4541	10.3453
IMMT	1778.41	0.00307336	0.0119739	0.906739	-1.10285	148.63	163.917
ERVK13-1	172.326	0.000702238	0.00367228	1.26302	1.26302	14.5159	11.493
PPM1B	709.593	0.000186461	0.00126352	1.17032	1.17032	60.0289	51.2926
CAMKK1	100.156	0.46876	0.599155	1.05673	1.05673	10.1323	9.58832
CEP68	1252.08	0.0385716	0.0891106	1.06352	1.06352	102.522	96.3996
OPTN	348.009	4.15308e-12	3.44169e-09	2.23292	2.23292	39.4252	17.6564
NKD1	166.155	0.00693859	0.0231637	1.21813	1.21813	13.406	11.0054
NME7	220.258	0.00360047	0.0136504	0.846514	-1.18132	18.205	21.5058
PURG	145.513	0.00237647	0.0096818	1.25679	1.25679	11.9037	9.47152
NOP16	185.041	1.75438e-07	4.85176e-06	0.656356	-1.52356	13.2478	20.1838
KLHDC8B	147.957	6.65437e-06	8.88094e-05	1.44549	1.44549	13.2534	9.16878
ENDOG	209.715	0.736153	0.823939	0.982104	-1.01822	19.7706	20.1309
TTC30A	579.828	0.285574	0.41783	1.04206	1.04206	53.4855	51.3268
NCOA6	355.042	0.0033847	0.0129694	1.14001	1.14001	28.4549	24.9602
PRELID1	1122.04	4.18773e-05	0.000383843	0.835521	-1.19686	90.8764	108.766
INO80B	67.557	0.00165541	0.00727143	0.745601	-1.3412	5.49759	7.37337
ASAP1	538.074	0.000822262	0.00416842	0.883668	-1.13165	38.3635	43.4139
ZNF830	304.18	0.00418258	0.0153929	1.15985	1.15985	25.0832	21.6262
CBS	594.699	3.10895e-05	0.000304582	0.807975	-1.23766	48.616	60.1701
ARL6IP4	805.423	0.510266	0.636921	0.978039	-1.02245	71.9974	73.614
AC011330.1	42.9649	0.450899	0.58283	1.12141	1.12141	4.7894	4.27089
ZNF548	400.487	0.000626645	0.00335545	1.16996	1.16996	32.5928	27.8581
CDK2AP1	1520.57	0.000469339	0.00268892	1.12183	1.12183	128.28	114.349
ADAMTSL2	222.138	2.49498e-05	0.000254705	1.37186	1.37186	24.0974	17.5655
ZNF407	336.147	0.00596085	0.0204471	1.14868	1.14868	27.9153	24.3021
ZNF623	701.623	0.00613576	0.0209592	1.11527	1.11527	57.0019	51.1106
ZNF678	674.72	0.0565966	0.120443	1.11302	1.11302	52.652	47.3056
MIF4GD	162.35	0.226475	0.350921	0.936068	-1.0683	14.2224	15.1938
MMS19	932.384	1.60527e-05	0.00017977	0.848211	-1.17895	75.0102	88.4334
RUFY3	3334.78	8.30227e-09	4.99839e-07	1.3076	1.3076	303.725	232.276
DIXDC1	793.378	0.0882287	0.170368	0.935013	-1.0695	68.4593	73.2175
GPAM	1199.77	0.145714	0.249099	1.05014	1.05014	111.216	105.906
ABCD2	78.0763	0.973651	0.983495	1.00646	1.00646	5.25832	5.22456
FAM219A	594.47	2.59526e-07	6.72096e-06	1.40296	1.40296	65.7646	46.8758
RRP15	703.331	6.74646e-05	0.000566413	0.833012	-1.20046	55.9103	67.1183
PLS3	146.036	7.56381e-06	9.77605e-05	0.67413	-1.48339	7.80535	11.5784
GNG3	33.4875	6.6886e-07	1.44523e-05	2.29362	2.29362	3.55305	1.5491
UBQLN2	528.698	0.455259	0.58658	1.02892	1.02892	40.8637	39.7152
TMEM108	1446.15	0.167182	0.277874	1.05508	1.05508	131.143	124.296
FMR1	814.293	0.00257431	0.0103265	1.11556	1.11556	67.4722	60.483
TMEM185B	667.326	0.254453	0.382672	0.963813	-1.03755	58.0695	60.2497
TRAPPC11	549.042	0.462301	0.59343	1.02647	1.02647	43.4959	42.3741
CNTLN	580.476	0.132512	0.231531	1.06318	1.06318	44.757	42.0974
SLC25A6	3093.67	6.09206e-05	0.000519207	0.825442	-1.21147	249.992	302.858
DDX1	17022.4	0.748325	0.833194	1.01047	1.01047	1347.4	1333.43
ZNF585A	194.457	0.0295077	0.0719337	1.1148	1.1148	15.7422	14.121
SNHG17	358.522	2.52733e-05	0.00025689	0.732647	-1.36491	27.8476	38.0096
DOK6	311.205	0.00873824	0.0276826	1.16098	1.16098	24.9612	21.5
DDX31	256.422	3.49629e-05	0.000333485	0.783734	-1.27594	20.2626	25.8539
PHB	2462.44	1.00126e-05	0.000122234	0.844614	-1.18397	197.014	233.259
GRIPAP1	577.901	1.07037e-05	0.000128868	1.29377	1.29377	51.9602	40.1618
DBN1	4402.5	5.54189e-05	0.000479866	1.23638	1.23638	381.995	308.963
STMN4	683.643	1.54491e-12	2.4183e-09	1.92508	1.92508	75.7042	39.3253
LDLRAD3	679.475	0.674438	0.776519	0.986788	-1.01339	60.3559	61.164
AL161891.1	125.456	0.869496	0.919284	1.01584	1.01584	8.95022	8.81065
KDM5A	986.75	0.951106	0.970322	0.997825	-1.00218	75.2	75.3639
MSX1	31.1026	0.00779994	0.0252669	1.46129	1.46129	2.36767	1.62025
RBM4	1897.86	0.00664256	0.0223662	1.08749	1.08749	158.623	145.862
TMEFF1	1032.52	0.000396284	0.00234771	1.14521	1.14521	88.0166	76.8562
UBL3	280.6	0.0080632	0.0259585	1.14874	1.14874	21.7925	18.9709
AUP1	922.855	0.823018	0.886511	1.00668	1.00668	83.8874	83.3304
DNAJA1	4193.36	0.0160084	0.0444211	1.09334	1.09334	394.982	361.262
DCUN1D3	278.107	0.000561517	0.0030721	1.20589	1.20589	23.7631	19.7058
ANKFY1	704.411	0.000319261	0.00196322	1.17148	1.17148	58.9555	50.3258
PLXNC1	263.808	0.000556016	0.00304911	1.25658	1.25658	21.7784	17.3316
GLUD1	1649.79	2.56521e-05	0.00025999	0.863143	-1.15856	134.2	155.479
PCOLCE2	92.2752	0.000338474	0.00205979	0.734626	-1.36124	7.33689	9.98724
CARMIL2	213.788	0.181583	0.296012	1.07404	1.07404	20.6024	19.1822
GPATCH2L	1002.49	0.043971	0.0989717	1.07633	1.07633	80.2436	74.5533
PAOX	33.4136	0.000197117	0.001323	1.73432	1.73432	3.01495	1.73841
ATXN7L2	102.161	0.0225886	0.0583225	1.16959	1.16959	8.09272	6.9193
UBE2Q2	449.013	0.0390627	0.0900695	1.08714	1.08714	36.068	33.1769
OAZ2	647.848	3.6314e-05	0.000344275	1.18707	1.18707	55.529	46.7783
PCDHGC3	266.987	8.6826e-06	0.000109117	1.33017	1.33017	23.6867	17.8074
ZCCHC10	307.326	0.0273025	0.067628	1.10522	1.10522	24.7454	22.3895
EXOC1	647.16	0.0209348	0.0548705	1.10966	1.10966	52.1497	46.9961
RDX	586.329	3.72796e-05	0.000351536	1.23729	1.23729	50.9513	41.1798
PPFIA4	108.147	0.00208268	0.00872979	0.747239	-1.33826	9.04432	12.1037
CPNE7	236.67	1.38343e-05	0.000159883	0.736719	-1.35737	18.5078	25.1219
ZNF730	191.424	0.810355	0.877686	0.984663	-1.01558	13.5278	13.7386
TRIO	3182.02	2.57218e-08	1.14674e-06	1.31049	1.31049	290.432	221.622
TECPR2	223.627	5.67058e-07	1.25864e-05	1.42518	1.42518	20.6619	14.4978
MARCKS	6379.87	0.00928571	0.0289931	1.09149	1.09149	521.831	478.089
GNL3	1471.68	2.53103e-08	1.13558e-06	0.724903	-1.37949	109.581	151.167
DPF1	220.761	0.0206169	0.0542089	1.13133	1.13133	18.0362	15.9424
ASAP3	291.246	4.83713e-05	0.000430416	1.3424	1.3424	25.5445	19.0289
PAPSS2	40.3464	0.929035	0.956673	1.0082	1.0082	2.61714	2.59586
AP5M1	845.562	0.00303506	0.011864	1.14339	1.14339	68.5879	59.9862
GRIN3A	57.1725	2.77491e-05	0.000277649	1.73967	1.73967	5.01981	2.88549
FAM118B	244.579	0.0230205	0.0591596	1.10217	1.10217	20.0265	18.17
URI1	1145.67	7.25476e-06	9.46832e-05	0.828049	-1.20766	90.3488	109.11
LINC02301	59.571	0.0314035	0.0757166	0.813518	-1.22923	3.27502	4.02576
GSPT1	2454.02	1.77957e-05	0.000193618	0.835643	-1.19668	192.464	230.319
ADAT1	248.291	0.133067	0.2323	1.07013	1.07013	19.8622	18.5606
PRSS12	8766.49	5.59316e-06	7.71758e-05	1.26758	1.26758	766.159	604.425
PCDHGA11	251.073	0.215177	0.336973	1.09086	1.09086	19.0838	17.4943
TTPAL	298.317	0.0050399	0.0178487	1.15994	1.15994	24.4011	21.0365
CRAT	185.68	3.15653e-07	7.78796e-06	1.6006	1.6006	17.7548	11.0926
GNAI2	639.347	3.03556e-06	4.69428e-05	1.27565	1.27565	57.711	45.2406
RBFOX2	5744.31	2.72139e-05	0.000272681	1.16571	1.16571	485.792	416.734
TRMT1	302.946	1.4433e-06	2.63042e-05	0.753348	-1.32741	23.3481	30.9924
GRPEL2	1175.3	0.00275668	0.0109274	0.898965	-1.11239	97.8131	108.806
GATAD2B	436.976	0.00323652	0.0125092	1.13182	1.13182	35.0171	30.9387
CTPS2	637.329	0.00107664	0.00517318	1.12877	1.12877	53.7222	47.5936
DGKH	583.197	0.0776234	0.154457	0.900351	-1.11068	38.4542	42.7102
DBH-AS1	19.4966	0.517559	0.643205	1.10058	1.10058	2.15835	1.9611
AC020916.1	74.1763	0.00462714	0.0166932	1.26719	1.26719	6.2531	4.93461
AVIL	28.1489	0.0607969	0.127305	1.27332	1.27332	3.40057	2.67063
TRIM7	20.5652	0.896084	0.935083	0.977423	-1.0231	2.2823	2.33502
POLD4	34.5337	0.00646121	0.0219012	1.40469	1.40469	3.00973	2.14263
NBR1	1446.4	0.0172134	0.0469601	1.09037	1.09037	119.596	109.684
AMER3	594.035	0.000125388	0.000929227	1.23254	1.23254	50.4629	40.9421
MAP3K5	176.979	0.122329	0.218619	0.91142	-1.09719	15.0119	16.4709
PCDHA4	102.772	0.467493	0.59797	1.08427	1.08427	7.02599	6.47992
PDIK1L	160.91	0.0698328	0.142176	1.12173	1.12173	12.6511	11.2783
STARD7-AS1	56.7393	9.13242e-06	0.000113255	1.58738	1.58738	5.46473	3.4426
NBL1	229.697	1.52065e-06	2.73251e-05	1.43908	1.43908	20.3208	14.1207
METAP2	1959.2	0.000787574	0.00402881	0.897428	-1.1143	163.303	181.968
KMT2E	840.823	0.000487986	0.00277431	1.17092	1.17092	69.321	59.2019
ZNF726	298.613	0.154653	0.261147	1.0661	1.0661	24.0598	22.568
MIR924HG	80.2751	0.749697	0.833865	1.02385	1.02385	5.63555	5.50427
PER1	107.741	0.00728072	0.0240645	0.791893	-1.2628	9.20792	11.6277
PTPN9	1194.22	3.88397e-06	5.77796e-05	1.20045	1.20045	104.179	86.7827
ABLIM1	2338.54	7.6524e-06	9.87243e-05	0.820247	-1.21914	183.482	223.691
NEBL	254.864	0.095753	0.181557	1.08622	1.08622	19.6774	18.1154
CAMKK2	665.731	0.000272094	0.00171895	0.857525	-1.16615	54.5255	63.5847
TENM1	14.0672	0.344811	0.480248	1.17651	1.17651	0.759987	0.645966
CTSV	277.28	0.499214	0.628108	0.96964	-1.03131	25.1316	25.9185
PRKAR2A	923.44	0.210279	0.330799	0.956379	-1.04561	79.3775	82.998
NRXN3	19.9538	0.000657247	0.00348225	1.94248	1.94248	3.26443	1.68054
RASSF2	207.418	0.000262745	0.00167264	1.23168	1.23168	17.4001	14.1272
MAFF	97.5323	0.00457945	0.0165721	1.25487	1.25487	10.7347	8.55445
MPG	141.41	0.0119042	0.035329	0.845607	-1.18258	12.0427	14.2414
MAP6	491.533	2.44441e-07	6.4009e-06	1.3799	1.3799	45.0542	32.6504
RNF11	968.102	6.38248e-08	2.23118e-06	1.32833	1.32833	88.0302	66.2715
CACNA2D2	804.295	5.85513e-09	3.83661e-07	1.51345	1.51345	77.5236	51.223
TTC28	963.65	0.00916743	0.0286938	1.09752	1.09752	77.0248	70.1808
ZBTB1	517.616	0.00051359	0.00287921	1.18837	1.18837	42.9133	36.111
TLCD5	339.039	0.903152	0.940399	0.991625	-1.00845	31.2209	31.4846
EIF3A	4915.39	0.00114697	0.00544059	0.875793	-1.14182	411.475	469.832
MEX3B	912.308	0.0151228	0.0425492	1.11771	1.11771	72.6246	64.9764
TUFM	2024.54	0.000538202	0.00297808	0.878923	-1.13776	167.382	190.44
ENAH	3830.2	0.0360142	0.0843785	1.08875	1.08875	306.172	281.214
RND3	1448.3	1.62855e-06	2.88591e-05	1.32367	1.32367	128.768	97.2812
PIP4K2A	360.187	0.492151	0.621219	1.02827	1.02827	27.4442	26.6898
TUBB3	4368.17	7.68443e-08	2.56701e-06	1.37253	1.37253	403.714	294.139
ZNF671	101.553	0.0206816	0.0543384	1.17281	1.17281	8.04529	6.85982
POLB	360.959	0.753061	0.836438	1.01258	1.01258	27.4762	27.1348
CSTF2T	997.88	0.016814	0.0460759	1.08711	1.08711	82.5237	75.9114
KCNC1	95.7595	0.0472631	0.104857	1.16228	1.16228	7.36075	6.33302
CDH24	271.053	0.734003	0.82228	0.985199	-1.01502	24.9323	25.3069
MORF4L1	2862.52	1.88687e-05	0.000202917	1.17316	1.17316	250.237	213.302
PEMT	171.588	0.103726	0.193421	0.911369	-1.09725	15.2979	16.7856
EHBP1L1	72.2449	9.92478e-05	0.000765034	1.47465	1.47465	6.42609	4.35771
DCX	1498.18	2.10471e-12	2.93362e-09	1.93752	1.93752	192.648	99.4305
WARS2-AS1	75.8864	0.558325	0.679716	1.04418	1.04418	5.80332	5.55777
ITGA9-AS1	44.3959	0.0639507	0.13264	1.25401	1.25401	3.29169	2.62493
CRTC1	130.289	0.00187318	0.00803329	1.27171	1.27171	10.3666	8.1517
MDH2	1734.92	4.61866e-07	1.06668e-05	0.788584	-1.2681	134.529	170.596
ACAT2	1510.12	1.70577e-05	0.000187594	1.19388	1.19388	135.883	113.817
GTF2I	5170.45	0.000407438	0.00240066	1.14261	1.14261	438.382	383.668
SENP6	1979.58	0.032765	0.0785024	1.07927	1.07927	161.787	149.904
FAM13A-AS1	72.1007	0.134261	0.234022	1.2423	1.2423	4.83434	3.89146
LATS1	651.013	0.00523086	0.0183543	1.12163	1.12163	52.4553	46.767
ENTR1	300.165	7.64049e-06	9.86611e-05	0.754415	-1.32553	23.095	30.6132
FIGN	42.3516	0.119363	0.214597	0.809616	-1.23515	3.68374	4.54999
UBE2R2	1084.96	0.072263	0.146144	1.06336	1.06336	88.1706	82.9171
AMMECR1	217.133	0.0127299	0.0372613	0.887831	-1.12634	15.1988	17.119
PHF20L1	1007.77	0.00569171	0.0196945	1.13035	1.13035	82.7344	73.1938
CLASP1	2079.52	0.000613644	0.00329459	1.12106	1.12106	174.074	155.276
CCNT2	985.221	0.111353	0.20403	1.05878	1.05878	78.5532	74.1925
NCBP3	938.072	0.000295528	0.00184629	1.18002	1.18002	79.8551	67.6729
SRRM2	1368.82	0.759475	0.840618	1.01308	1.01308	101.156	99.8494
LRRC4B	190.985	0.000150478	0.0010723	1.35153	1.35153	16.1704	11.9645
KLF3-AS1	18.8112	0.000445979	0.00258239	1.95478	1.95478	1.67615	0.857464
GJC1	2472.2	0.000250503	0.00161219	1.15695	1.15695	209.803	181.341
SNU13	1174.74	4.83943e-05	0.000430416	0.859409	-1.16359	95.663	111.313
COLGALT1	817.186	0.194647	0.312286	0.95202	-1.0504	71.5587	75.1652
KDM5D	458.176	0.0149755	0.0422456	1.09222	1.09222	37.3621	34.2074
SNHG7	338.459	0.000104971	0.000798637	0.826119	-1.21048	27.2702	33.01
TMEM19	500.289	0.00188662	0.00808107	1.15645	1.15645	48.8945	42.2797
SH3BP4	693.117	5.20249e-05	0.000456367	1.23376	1.23376	58.685	47.5661
THSD1	29.2146	0.631481	0.742101	0.951655	-1.0508	2.93503	3.08413
GRIK5	160.826	0.000956813	0.00469345	1.2522	1.2522	13.3715	10.6784
SRSF5	1270.31	0.0901796	0.173606	1.06878	1.06878	104.895	98.1454
ZNF213-AS1	169.383	0.0292246	0.0713792	1.12792	1.12792	14.0033	12.4152
GNG12	280.916	0.431902	0.564787	0.955928	-1.0461	26.0249	27.2247
TERC	758.792	0.00255503	0.0102675	0.828475	-1.20704	60.5668	73.1064
RPL27A	8213.06	7.94753e-09	4.87539e-07	0.757174	-1.3207	619.752	818.507
RPL7A	13264.2	4.21918e-11	1.21306e-08	0.681018	-1.46839	926.392	1360.31
CLPB	2092.44	0.29034	0.423292	0.968268	-1.03277	179.699	185.588
TSTA3	196.838	0.0548522	0.117583	0.905479	-1.10439	17.1604	18.9517
ERBIN	1330.39	0.918982	0.950141	0.996261	-1.00375	101.418	101.798
GREB1L	414.42	0.0154149	0.0431654	1.13668	1.13668	33.1324	29.1483
PHKA2-AS1	40.4001	0.794187	0.866923	0.97223	-1.02856	3.63945	3.7434
ZNF713	149.206	0.00325632	0.0125513	1.24724	1.24724	11.9219	9.55866
CDK17	518.674	0.565589	0.685657	0.977657	-1.02285	38.9576	39.8479
SIGMAR1	906.681	2.29841e-06	3.75203e-05	0.781843	-1.27903	71.5992	91.5775
C20orf194	361.299	0.00108355	0.00520103	1.15588	1.15588	30.0158	25.968
PBX2	547.117	0.0104578	0.0317384	1.11487	1.11487	46.4311	41.6471
COA4	424.959	1.29018e-05	0.000150964	0.803973	-1.24382	33.7091	41.9282
RCC1	419.267	1.96864e-06	3.35359e-05	0.766327	-1.30493	32.2159	42.0394
AP000894.2	207.568	0.000144553	0.0010406	1.25521	1.25521	22.1203	17.6228
TGOLN2	509.834	0.000205955	0.00137251	1.19227	1.19227	43.1708	36.2088
DGCR8	727.665	0.00522197	0.0183276	1.10506	1.10506	60.2399	54.5128
GPR26	36.5427	0.000174349	0.00119816	0.603267	-1.65764	1.57174	2.60538
GMPR	14.5628	0.622207	0.734634	0.92733	-1.07837	0.595358	0.642014
ING1	228.156	0.0269417	0.066975	1.11721	1.11721	18.8402	16.8636
AC021127.1	27.1233	0.109333	0.201262	1.28259	1.28259	1.88219	1.46749
CS	1674.23	3.16753e-06	4.8823e-05	0.83609	-1.19604	131.167	156.881
TAGLN2	753.57	0.000710068	0.00370223	1.13398	1.13398	71.8068	63.3227
ZHX3	326.641	0.0183116	0.0493919	1.12139	1.12139	26.4896	23.6222
SPIRE2	117.711	6.26896e-06	8.48387e-05	1.48306	1.48306	10.8852	7.33971
MYO18A	695.241	1.35373e-06	2.51932e-05	1.43186	1.43186	63.7532	44.5248
RASSF3	262.181	0.234421	0.36014	1.055	1.055	24.7846	23.4924
HP1BP3	1324.69	0.006569	0.0221822	1.08904	1.08904	110.096	101.094
LINC00858	44.0209	0.00662293	0.0223215	1.32595	1.32595	3.48419	2.62768
B4GALT4	645.609	0.209849	0.330282	1.05271	1.05271	50.5792	48.0469
SGK1	149.168	1.45979e-11	6.24773e-09	2.57941	2.57941	19.5828	7.59195
CNN3	6051.83	0.0719442	0.145667	1.05612	1.05612	487.115	461.23
MC1R	105.762	0.00309157	0.0120258	1.25304	1.25304	8.91725	7.1165
SULT1C4	228.273	0.0482803	0.10661	0.885137	-1.12977	19.9768	22.5691
ACBD5	1006.55	0.0641013	0.132848	1.06443	1.06443	79.4038	74.5975
CHD2	1710.31	6.63288e-07	1.4376e-05	1.24782	1.24782	154.796	124.053
ADAM15	446.036	0.797195	0.868726	0.987242	-1.01292	41.1993	41.7317
N4BP2L2	1604.28	0.793525	0.86658	0.99007	-1.01003	120.9	122.113
RUVBL2	1425.69	0.00294199	0.0115386	0.882711	-1.13287	120.311	136.297
BCL2L11	315.332	0.564944	0.685052	1.02446	1.02446	23.3153	22.7585
H2BC20P	137.544	0.485235	0.61519	1.04945	1.04945	9.79975	9.33799
ZNF510	631.887	0.00613429	0.0209592	1.1033	1.1033	52.2355	47.3449
ZNF138	192.254	0.207955	0.327997	0.913264	-1.09497	12.6303	13.8299
PCDHB4	71.5058	0.033041	0.0789486	1.24158	1.24158	5.38892	4.34037
CYP27C1	69.5657	0.00021231	0.00140556	1.41717	1.41717	6.20792	4.38052
RPS3	11078.2	1.16745e-09	1.23725e-07	0.706052	-1.41633	802.15	1136.11
ADGRB2	409.534	0.192096	0.309003	1.07613	1.07613	39.2013	36.4281
ADK	532.11	1.02759e-06	2.02471e-05	0.755144	-1.32425	40.6118	53.7802
LIMK2	385.319	0.000337718	0.00205697	1.21136	1.21136	32.8649	27.1307
SLC7A5	1031.42	2.9092e-08	1.23821e-06	0.661225	-1.51235	72.8283	110.141
DPAGT1	226.317	0.00724331	0.0239596	0.858892	-1.16429	19.3964	22.5831
EIF3B	2351.37	0.000102971	0.000786692	0.843903	-1.18497	192.473	228.075
DPY19L3	493.759	0.112183	0.204984	0.930615	-1.07456	36.7587	39.4993
MMP15	231.429	7.1771e-06	9.4001e-05	1.53684	1.53684	21.7277	14.138
TBC1D14	1863.01	0.0722369	0.14612	0.947146	-1.0558	158.367	167.205
RESF1	1147.42	0.000783219	0.00401821	1.18598	1.18598	94.4477	79.6369
PAFAH1B1	3536.06	3.6368e-08	1.43516e-06	1.28178	1.28178	320.685	250.187
LINC01089	95.3297	0.609674	0.725184	1.03523	1.03523	7.21179	6.96635
EHHADH	56.5117	0.50272	0.63038	0.951641	-1.05082	3.79044	3.98306
EIF3L	5836.48	2.96014e-09	2.38966e-07	0.766122	-1.30528	435.837	568.887
TMEM121B	101.351	0.0215974	0.0562828	1.18216	1.18216	8.05249	6.81167
PGBD1	282.893	6.02651e-05	0.000514554	1.25582	1.25582	24.3916	19.4228
TBC1D4	395.316	2.23893e-08	1.04099e-06	0.708242	-1.41195	28.8913	40.7929
DIMT1	297.144	0.000145782	0.00104678	0.776594	-1.28767	23.7811	30.6223
LINC01695	20.2365	0.543705	0.666584	1.10836	1.10836	1.31924	1.19026
RSRP1	152.329	0.0453328	0.101453	1.14683	1.14683	12.0465	10.5041
FASN	5222.32	0.037891	0.0877973	0.858967	-1.16419	447.342	520.791
EPDR1	156.931	0.629925	0.740581	1.02683	1.02683	14.2719	13.899
EFTUD2	2534.82	1.00491e-05	0.000122573	0.840235	-1.19014	202.142	240.578
AL136295.7	12.7907	0.0191624	0.0511579	1.51943	1.51943	1.00133	0.659014
BRAF	615.405	0.00309718	0.01204	1.17041	1.17041	50.9824	43.5593
PCDHGC4	28.9689	0.0296231	0.0722025	1.34829	1.34829	2.31413	1.71634
[truncated: 12,089 more rows]

## Sheet: siMYCN_72h_KCNR
Gene symbol	P-value (siMYCN vs. siCtrl)	FDR step up (siMYCN vs. siCtrl)	Ratio (siMYCN vs. siCtrl)	Fold change (siMYCN vs. siCtrl)	LSMean(siMYCN) (siMYCN vs. siCtrl)	LSMean(siCtrl) (siMYCN vs. siCtrl)
CHRNA3	5.41408e-11	7.54669e-07	2.3085	2.3085	517.74	224.276
CHGB	1.87279e-09	1.13124e-05	2.11916	2.11916	307.006	144.871
ASS1	2.47039e-09	1.13124e-05	2.27913	2.27913	75.9939	33.3434
DBH	5.53507e-09	1.13124e-05	2.19055	2.19055	110.208	50.3106
SLC6A2	6.32662e-09	1.13124e-05	2.00736	2.00736	172.924	86.1453
HPCAL1	6.45376e-09	1.13124e-05	1.86162	1.86162	70.8109	38.0373
DPYSL3	7.34766e-09	1.13124e-05	1.66184	1.66184	793.983	477.774
SEMA3C	7.63816e-09	1.13124e-05	2.34867	2.34867	82.1136	34.9617
OPTN	7.65778e-09	1.13124e-05	2.9136	2.9136	24.5697	8.43277
CBLN2	9.64245e-09	1.13124e-05	2.47458	2.47458	88.8928	35.9224
NPY	1.07809e-08	1.13124e-05	3.558	3.558	65.5825	18.4324
PTPRO	1.1064e-08	1.13124e-05	2.11189	2.11189	56.7807	26.8862
DUSP6	1.17349e-08	1.13124e-05	1.75745	1.75745	139.589	79.4269
LGALS1	1.21591e-08	1.13124e-05	2.49082	2.49082	21.0533	8.45236
AC136621.1	1.27088e-08	1.13124e-05	2.07271	2.07271	81.6791	39.4068
GAP43	1.29851e-08	1.13124e-05	1.98342	1.98342	141.477	71.3295
PCDH17	1.46413e-08	1.18664e-05	2.16614	2.16614	77.2769	35.675
AZIN1	1.53235e-08	1.18664e-05	1.58927	1.58927	343.076	215.869
SLC8A3	1.84719e-08	1.30202e-05	1.9249	1.9249	116.133	60.3322
KIDINS220	1.86817e-08	1.30202e-05	1.51513	1.51513	654.895	432.236
SCG2	2.23572e-08	1.33529e-05	1.64347	1.64347	482.15	293.374
NSG2	2.24421e-08	1.33529e-05	1.53612	1.53612	1180.46	768.465
UBE2QL1	2.24484e-08	1.33529e-05	1.87882	1.87882	178.574	95.0455
XPR1	2.41519e-08	1.33529e-05	1.5091	1.5091	528.996	350.538
TRIB2	2.54179e-08	1.33529e-05	1.481	1.481	909.766	614.293
JAK1	2.59327e-08	1.33529e-05	1.5698	1.5698	203.215	129.453
ACE	2.65731e-08	1.33529e-05	2.73337	2.73337	38.5359	14.0983
CADM1	2.7494e-08	1.33529e-05	1.52798	1.52798	426.159	278.904
TRIM2	2.77806e-08	1.33529e-05	1.51701	1.51701	268.514	177.002
ASTN2	3.49081e-08	1.62195e-05	1.53771	1.53771	280.81	182.616
RND3	3.72188e-08	1.67352e-05	1.59815	1.59815	142.073	88.8984
STXBP5	4.00805e-08	1.67721e-05	1.7233	1.7233	104.001	60.3497
HK2	4.06433e-08	1.67721e-05	0.584856	-1.70982	63.3869	108.38
TNR	4.09106e-08	1.67721e-05	3.84878	3.84878	10.676	2.77387
CPEB4	4.59466e-08	1.82986e-05	1.69384	1.69384	79.0388	46.6626
SPRY2	4.74157e-08	1.83301e-05	1.58952	1.58952	109.124	68.6521
RTN1	4.86559e-08	1.83301e-05	1.54488	1.54488	214.824	139.055
ALCAM	5.04964e-08	1.83705e-05	1.45974	1.45974	809.153	554.313
PTN	5.13989e-08	1.83705e-05	2.29915	2.29915	40.6374	17.6749
L1CAM	5.50515e-08	1.87027e-05	1.79699	1.79699	224.089	124.703
GABBR1	5.60824e-08	1.87027e-05	2.1945	2.1945	19.8622	9.05086
STMN2	5.63536e-08	1.87027e-05	1.88849	1.88849	820.736	434.598
SYT9	6.24227e-08	1.99981e-05	1.98173	1.98173	53.5381	27.0158
STMN4	6.31263e-08	1.99981e-05	1.84473	1.84473	53.3252	28.9067
TAF4B	6.73106e-08	2.08498e-05	0.589985	-1.69496	27.0216	45.8004
BCL2	6.99553e-08	2.10928e-05	1.57771	1.57771	472.994	299.798
SLC7A14	7.11213e-08	2.10928e-05	1.5281	1.5281	127.081	83.1627
LAMP5	8.10388e-08	2.35333e-05	1.64676	1.64676	151.123	91.77
SEPTIN6	8.44886e-08	2.35541e-05	1.43721	1.43721	334.768	232.928
DKK3	8.44898e-08	2.35541e-05	2.18054	2.18054	59.5306	27.3009
CHST11	9.22978e-08	2.48484e-05	1.56626	1.56626	128.016	81.7336
DCX	9.26981e-08	2.48484e-05	1.61248	1.61248	543.478	337.046
NTRK1	9.67193e-08	2.49966e-05	2.1127	2.1127	58.7423	27.8043
HPCAL4	9.73966e-08	2.49966e-05	1.94509	1.94509	30.8032	15.8364
SYT11	9.86306e-08	2.49966e-05	1.52093	1.52093	440.332	289.515
NAP1L5	1.04326e-07	2.57492e-05	1.94378	1.94378	28.9221	14.8793
CYB561	1.05295e-07	2.57492e-05	3.17646	3.17646	13.2319	4.16561
SCN3A	1.11591e-07	2.64332e-05	1.68368	1.68368	124.535	73.9662
INHBA	1.11885e-07	2.64332e-05	1.80758	1.80758	58.5541	32.3936
MAGED2	1.20202e-07	2.7925e-05	1.65551	1.65551	262.727	158.698
RUFY3	1.28591e-07	2.9144e-05	1.46474	1.46474	295.173	201.519
NCAM1	1.29631e-07	2.9144e-05	1.45844	1.45844	382.754	262.441
ATP1B1	1.36426e-07	2.99845e-05	1.77214	1.77214	242.848	137.037
GNG11	1.38597e-07	2.99845e-05	1.98537	1.98537	24.8635	12.5234
FAM167A	1.39823e-07	2.99845e-05	1.43425	1.43425	370.212	258.122
ARRDC3	1.47585e-07	3.10626e-05	1.49062	1.49062	117.769	79.0066
H19	1.49307e-07	3.10626e-05	1.64262	1.64262	189.499	115.364
ASTN1	1.53908e-07	3.1549e-05	1.82396	1.82396	42.452	23.2746
SCAT8	1.67509e-07	3.38392e-05	3.25704	3.25704	11.4065	3.50209
GDI1	1.83931e-07	3.66258e-05	1.40213	1.40213	318.024	226.815
BCAR3	1.92871e-07	3.78651e-05	1.90039	1.90039	20.5974	10.8385
CHRNA7	1.99782e-07	3.86773e-05	1.52269	1.52269	116.337	76.4025
RET	2.03447e-07	3.88471e-05	2.29272	2.29272	521.981	227.669
AHNAK2	2.0908e-07	3.93833e-05	2.10629	2.10629	26.7883	12.7182
SERINC1	2.17977e-07	4.05118e-05	1.57865	1.57865	141.01	89.3234
GPR22	2.26803e-07	4.15974e-05	2.86416	2.86416	7.37063	2.5734
SLC18A1	2.41974e-07	4.35044e-05	2.54922	2.54922	13.1987	5.17754
TMSB4X	2.49575e-07	4.35044e-05	1.65333	1.65333	189.265	114.476
SRC	2.50775e-07	4.35044e-05	1.77075	1.77075	125.876	71.0859
FGF14	2.55073e-07	4.35044e-05	1.54546	1.54546	90.0041	58.2377
HID1	2.55234e-07	4.35044e-05	2.0312	2.0312	21.3065	10.4896
SELENOW	2.55926e-07	4.35044e-05	1.59321	1.59321	71.3799	44.8026
MLLT11	2.68292e-07	4.50569e-05	1.48614	1.48614	387.913	261.021
SPRY4	2.7458e-07	4.55639e-05	1.54197	1.54197	138.491	89.8141
RHOC	2.79488e-07	4.58328e-05	1.66678	1.66678	30.3925	18.2342
SARAF	2.87909e-07	4.66648e-05	1.44036	1.44036	230.527	160.048
TIMP2	3.08437e-07	4.91768e-05	1.3664	1.3664	377.705	276.424
RAB6B	3.10464e-07	4.91768e-05	1.76208	1.76208	29.9044	16.9711
SGK1	3.18939e-07	4.98675e-05	1.62094	1.62094	76.5037	47.1971
PCDHB10	3.2198e-07	4.98675e-05	1.63652	1.63652	34.9111	21.3325
AGTPBP1	3.32548e-07	5.09383e-05	1.41414	1.41414	253.026	178.926
CADM3	3.46144e-07	5.24446e-05	1.74252	1.74252	59.0516	33.8886
AKAP12	3.5215e-07	5.24673e-05	1.42468	1.42468	158.125	110.99
PPP2R5B	3.5613e-07	5.24673e-05	2.40877	2.40877	15.1085	6.2723
CDKN2D	3.57586e-07	5.24673e-05	2.05489	2.05489	18.8922	9.19377
BLCAP	3.89691e-07	5.65823e-05	1.53845	1.53845	58.9849	38.3405
AKAP6	3.99878e-07	5.67528e-05	1.62196	1.62196	59.7126	36.8152
PRPH	4.02915e-07	5.67528e-05	1.44447	1.44447	122.907	85.0882
MAPT	4.08787e-07	5.67528e-05	1.57942	1.57942	97.2238	61.5565
TCAF1	4.12205e-07	5.67528e-05	1.34659	1.34659	354.958	263.597
DDC	4.1496e-07	5.67528e-05	1.42076	1.42076	181.358	127.649
PLD5	4.15294e-07	5.67528e-05	1.91978	1.91978	43.7487	22.7884
UBE2H	4.49356e-07	6.08115e-05	1.38992	1.38992	154.428	111.106
PCDHB14	4.64056e-07	6.21969e-05	1.5712	1.5712	45.3737	28.8784
XYLT1	4.82467e-07	6.40487e-05	2.12778	2.12778	19.8669	9.33695
TRIL	5.07332e-07	6.60261e-05	2.26309	2.26309	10.8046	4.77427
SLC22A17	5.07825e-07	6.60261e-05	1.57902	1.57902	56.8299	35.9907
TMEM151B	5.11573e-07	6.60261e-05	1.52965	1.52965	68.921	45.0568
NTRK2	5.31228e-07	6.79339e-05	1.63566	1.63566	73.2838	44.8038
H1-0	5.42303e-07	6.87197e-05	1.38999	1.38999	284.227	204.481
CTSB	5.68659e-07	7.14103e-05	1.36557	1.36557	269.083	197.048
CTNNA2	5.8168e-07	7.23932e-05	1.43136	1.43136	107.431	75.0555
KIF5A	6.26235e-07	7.72485e-05	1.81385	1.81385	63.1661	34.8243
SLC41A2	6.32147e-07	7.72924e-05	2.05871	2.05871	9.8485	4.78382
MOAP1	6.37681e-07	7.72924e-05	1.41194	1.41194	77.2194	54.6903
TMOD1	6.45215e-07	7.75315e-05	1.38233	1.38233	337.2	243.935
KDM5B	6.52329e-07	7.77163e-05	1.3645	1.3645	211.604	155.078
NNAT	6.63688e-07	7.83995e-05	1.57162	1.57162	78.2495	49.7892
BAALC	6.79903e-07	7.96401e-05	2.46236	2.46236	13.0282	5.29095
EFNB2	7.08487e-07	8.22967e-05	1.77029	1.77029	96.4643	54.4907
CDKN1C	7.2099e-07	8.30548e-05	1.72461	1.72461	20.5514	11.9165
TP53INP1	7.27486e-07	8.30548e-05	1.58846	1.58846	49.5744	31.209
GRM7	7.34346e-07	8.30548e-05	2.06172	2.06172	14.6126	7.08761
P2RX3	7.38847e-07	8.30548e-05	1.36876	1.36876	149.085	108.92
BOK	7.55728e-07	8.42727e-05	2.70826	2.70826	10.5534	3.89675
ENO3	7.70341e-07	8.52206e-05	1.78909	1.78909	28.8437	16.122
RBP1	7.96299e-07	8.73349e-05	1.45234	1.45234	155.944	107.374
GNG2	8.08419e-07	8.73349e-05	1.37095	1.37095	316.537	230.889
CDH2	8.12041e-07	8.73349e-05	1.31002	1.31002	595.463	454.545
CLASP2	8.17599e-07	8.73349e-05	1.32941	1.32941	289.396	217.688
TRIM36	8.23043e-07	8.73349e-05	1.74063	1.74063	23.787	13.6658
KCTD7	8.27047e-07	8.73349e-05	1.67697	1.67697	31.0772	18.5318
REEP1	8.5693e-07	8.89208e-05	1.7959	1.7959	30.7631	17.1297
CYLD	8.60219e-07	8.89208e-05	1.46832	1.46832	50.9272	34.6841
TMEM204	8.61203e-07	8.89208e-05	2.09054	2.09054	19.9513	9.54362
PCDHAC1	8.77608e-07	8.99484e-05	1.63648	1.63648	60.1299	36.7435
ZDHHC2	9.00398e-07	9.16106e-05	1.54787	1.54787	49.7231	32.1236
SHISA3	9.20943e-07	9.30219e-05	1.72021	1.72021	45.2206	26.2878
TMEM130	9.62921e-07	9.65623e-05	2.45382	2.45382	10.1941	4.15438
JUP	9.93306e-07	9.83494e-05	1.63056	1.63056	52.6899	32.314
SOX4	9.98616e-07	9.83494e-05	1.38043	1.38043	481.855	349.06
MAN1A1	1.00191e-06	9.83494e-05	1.46424	1.46424	58.4897	39.9454
SEZ6L	1.0297e-06	9.98518e-05	1.52377	1.52377	101.471	66.5918
SHISA2	1.03154e-06	9.98518e-05	2.40415	2.40415	13.6108	5.66137
TPST1	1.05706e-06	0.000101374	1.57922	1.57922	38.6427	24.4694
MYL6	1.06467e-06	0.000101374	1.57336	1.57336	382.799	243.3
FAM131B	1.06909e-06	0.000101374	1.63286	1.63286	34.2737	20.99
PPP1R16B	1.08233e-06	0.000101937	1.33977	1.33977	205.595	153.455
ASL	1.08967e-06	0.000101939	1.6903	1.6903	37.5774	22.2312
CD3EAP	1.12751e-06	0.000104125	0.569048	-1.75732	13.3076	23.3858
MAP1B	1.12797e-06	0.000104125	1.74636	1.74636	2431.41	1392.27
FBL	1.15751e-06	0.000106148	0.702318	-1.42386	101.924	145.126
ADAM12	1.16562e-06	0.000106193	1.74683	1.74683	42.7079	24.4488
NBL1	1.22625e-06	0.000110082	1.53212	1.53212	52.7403	34.423
COL22A1	1.24018e-06	0.000110082	1.83393	1.83393	24.8763	13.5645
BIRC5	1.24114e-06	0.000110082	0.750696	-1.3321	237.463	316.324
FBLIM1	1.24718e-06	0.000110082	1.88919	1.88919	22.5603	11.9418
WDR47	1.24779e-06	0.000110082	1.39334	1.39334	70.9791	50.9418
ID4	1.27272e-06	0.000111561	2.39953	2.39953	8.82078	3.67604
TRAP1	1.28056e-06	0.000111561	0.716676	-1.39533	156.353	218.164
PRKAR1A	1.32932e-06	0.000114408	1.3126	1.3126	399.026	303.996
ALDH1A3	1.33232e-06	0.000114408	2.0543	2.0543	18.5567	9.03311
GOLGA7B	1.33843e-06	0.000114408	1.7184	1.7184	17.6064	10.2458
HTR1E	1.35344e-06	0.000114408	2.49762	2.49762	8.28126	3.31567
ATP6V0A1	1.36175e-06	0.000114408	1.5239	1.5239	51.4654	33.7722
LMO3	1.36249e-06	0.000114408	0.660704	-1.51354	34.6948	52.5119
VAT1	1.46576e-06	0.000121635	1.45992	1.45992	141.761	97.1021
SHC2	1.466e-06	0.000121635	1.87295	1.87295	15.48	8.26504
PTPRR	1.50972e-06	0.000124521	1.58474	1.58474	46.8365	29.5546
RFTN1	1.53219e-06	0.000125631	1.48065	1.48065	170.31	115.024
SHC1	1.56122e-06	0.000127262	1.48636	1.48636	97.8003	65.7984
CALM2	1.62133e-06	0.000131394	1.3597	1.3597	1552.71	1141.95
FNDC4	1.6465e-06	0.000132663	1.67526	1.67526	28.8396	17.215
FTL	1.66742e-06	0.000133368	0.749015	-1.33509	382.98	511.312
IDS	1.67439e-06	0.000133368	1.53381	1.53381	133.945	87.3279
PLPPR2	1.71111e-06	0.000135114	1.63818	1.63818	25.9276	15.8271
SAMD14	1.7157e-06	0.000135114	1.67333	1.67333	23.0714	13.7877
ABCA12	1.73985e-06	0.000136106	1.77011	1.77011	18.9013	10.678
BRINP2	1.74782e-06	0.000136106	7.25143	7.25143	5.38077	0.742029
ZNF536	1.77249e-06	0.00013726	1.56194	1.56194	103.801	66.4561
SPRY1	1.78757e-06	0.000137662	1.69833	1.69833	27.2162	16.0253
KALRN	1.81432e-06	0.000138955	1.91246	1.91246	57.9229	30.2871
LONRF2	1.84126e-06	0.000140103	2.09926	2.09926	20.4153	9.72497
MAP1A	1.84941e-06	0.000140103	1.51582	1.51582	55.5942	36.6761
PTPRH	1.87898e-06	0.00014143	2.91508	2.91508	4.21256	1.44509
NUAK1	1.88722e-06	0.00014143	1.89024	1.89024	10.2546	5.42504
ABHD2	1.91239e-06	0.000142108	1.34021	1.34021	164.149	122.48
SKP2	1.91666e-06	0.000142108	0.721319	-1.38635	104.931	145.471
NYAP1	1.94769e-06	0.000143644	1.97923	1.97923	9.45855	4.77891
LIFR	1.96417e-06	0.000143708	1.55322	1.55322	42.34	27.2595
ARL6	1.96917e-06	0.000143708	1.31034	1.31034	200.663	153.137
ADAMTS9	1.99159e-06	0.000144587	1.72254	1.72254	291.273	169.095
SLCO3A1	2.0055e-06	0.000144843	1.60862	1.60862	43.9251	27.3061
GCH1	2.03829e-06	0.000146419	1.36322	1.36322	93.2978	68.4393
RPS6	2.052e-06	0.000146419	0.754138	-1.32602	793.46	1052.14
PLCL1	2.05884e-06	0.000146419	2.0163	2.0163	8.44251	4.18714
NPM1P27	2.0854e-06	0.000147163	0.747869	-1.33713	333.769	446.294
MVP	2.09042e-06	0.000147163	3.34581	3.34581	3.2665	0.976295
CTSF	2.10348e-06	0.000147338	0.629099	-1.58958	16.6802	26.5144
STK26	2.11888e-06	0.000147675	0.748271	-1.33641	85.0984	113.727
RGS4	2.1438e-06	0.000148669	1.32623	1.32623	1265.71	954.364
GPRASP1	2.18755e-06	0.000150952	1.58408	1.58408	36.3013	22.9164
SLC7A2	2.21908e-06	0.000152373	0.578613	-1.72827	13.8096	23.8667
CORO2A	2.24879e-06	0.000153656	1.54075	1.54075	53.3825	34.647
DCAF7	2.26171e-06	0.000153785	1.28501	1.28501	597.185	464.73
HTR2B	2.27597e-06	0.000154004	2.18727	2.18727	7.80127	3.56667
SEL1L3	2.30598e-06	0.000154803	2.51004	2.51004	15.2396	6.07144
DCAF4	2.31e-06	0.000154803	0.625829	-1.59788	15.5324	24.8189
GSN	2.37584e-06	0.00015844	2.40315	2.40315	6.55711	2.72855
KHDRBS3	2.387e-06	0.00015844	1.48232	1.48232	63.1543	42.605
MCF2L2	2.463e-06	0.00016271	2.40423	2.40423	7.02442	2.9217
LBR	2.48451e-06	0.000163357	0.739605	-1.35207	95.9945	129.792
ATP9A	2.51163e-06	0.000164365	1.39827	1.39827	311.055	222.458
PMP22	2.52968e-06	0.000164772	1.70273	1.70273	17.6633	10.3736
UNG	2.58707e-06	0.000166957	0.749244	-1.33468	111.491	148.805
RRP9	2.58719e-06	0.000166957	0.669101	-1.49454	32.1614	48.0666
APLP1	2.63649e-06	0.000169355	1.48991	1.48991	94.4447	63.3895
SYNGR3	2.66374e-06	0.00017032	1.88423	1.88423	19.6219	10.4138
KITLG	2.67757e-06	0.000170423	0.594201	-1.68293	13.1692	22.1629
RBMS3	2.7579e-06	0.000174738	1.4058	1.4058	451.858	321.425
BASP1	2.80872e-06	0.000177153	1.34978	1.34978	126.302	93.5726
KLF10	2.88437e-06	0.00018065	1.45359	1.45359	52.6742	36.2374
PJA2	2.89009e-06	0.00018065	1.34248	1.34248	197.907	147.419
EXOSC5	2.90924e-06	0.000181035	0.662208	-1.5101	26.3971	39.8623
PFAS	2.94755e-06	0.000181477	0.730633	-1.36868	152.919	209.297
DRGX	2.95401e-06	0.000181477	1.58672	1.58672	53.5176	33.7285
LGALS3BP	2.96603e-06	0.000181477	1.52741	1.52741	137.123	89.7753
RNF19A	2.96842e-06	0.000181477	1.44155	1.44155	49.7722	34.5268
CRIP2	3.00886e-06	0.000181927	1.9413	1.9413	29.761	15.3304
CLVS1	3.01436e-06	0.000181927	1.79071	1.79071	15.096	8.43016
IPO5	3.01493e-06	0.000181927	0.780868	-1.28063	452.77	579.829
NOMO3	3.05603e-06	0.000183612	1.33644	1.33644	146.766	109.819
SEC24D	3.09538e-06	0.000185178	1.35964	1.35964	103.98	76.4762
OXTR	3.1265e-06	0.000185356	1.85302	1.85302	11.0411	5.95844
MYCN	3.13119e-06	0.000185356	0.626242	-1.59683	1844.63	2945.55
ESRRG	3.14943e-06	0.000185356	1.37909	1.37909	82.5875	59.8856
PPFIBP2	3.15685e-06	0.000185356	1.4805	1.4805	63.6671	43.0039
SLC44A2	3.16484e-06	0.000185356	1.42688	1.42688	38.311	26.8496
NDRG2	3.20835e-06	0.000186042	1.55398	1.55398	23.4988	15.1217
ITM2C	3.21116e-06	0.000186042	1.31345	1.31345	239.592	182.414
CAMK2N1	3.2166e-06	0.000186042	1.77389	1.77389	16.4155	9.25396
CASP3	3.28585e-06	0.000187882	1.39753	1.39753	91.2741	65.3111
WLS	3.28791e-06	0.000187882	0.703899	-1.42066	39.4731	56.0778
ELAVL4	3.28884e-06	0.000187882	1.26853	1.26853	712.44	561.625
PTPRE	3.30956e-06	0.000188026	1.43731	1.43731	32.9721	22.9402
SSH2	3.31834e-06	0.000188026	1.72741	1.72741	168.702	97.6621
C18orf32	3.41141e-06	0.000192517	1.62487	1.62487	33.6268	20.6951
GEMIN5	3.64081e-06	0.000204634	0.759295	-1.31701	83.7149	110.253
RAB3C	3.65785e-06	0.000204766	1.48543	1.48543	69.938	47.0827
TLE5	3.71938e-06	0.000206681	1.29961	1.29961	177.654	136.698
SGIP1	3.72172e-06	0.000206681	1.51592	1.51592	48.923	32.2728
ZCCHC12	3.75272e-06	0.000207576	2.98549	2.98549	10.4445	3.49843
TUBB2A	3.78307e-06	0.000208428	1.45433	1.45433	214.891	147.76
AC010478.1	3.89795e-06	0.000213912	1.37241	1.37241	64.7914	47.21
SNX7	3.92672e-06	0.000214645	1.47608	1.47608	44.4662	30.1244
DKK1	3.95085e-06	0.000215121	1.42322	1.42322	75.983	53.388
STAC	3.98724e-06	0.000216257	1.38602	1.38602	62.8558	45.35
PDK1	4.08566e-06	0.000219615	0.631913	-1.5825	57.9243	91.665
MTMR9	4.08955e-06	0.000219615	1.38112	1.38112	107.796	78.0496
CLIP2	4.09642e-06	0.000219615	1.46974	1.46974	84.6748	57.612
THSD7A	4.18492e-06	0.000223389	1.36164	1.36164	345.958	254.075
RPS2P46	4.19886e-06	0.000223389	0.754885	-1.32471	198.467	262.91
WSB2	4.22333e-06	0.000223837	1.31631	1.31631	142.455	108.223
HMCN2	4.33321e-06	0.000228419	4.56721	4.56721	2.95724	0.647495
SEZ6L2	4.34257e-06	0.000228419	1.4459	1.4459	102.21	70.6896
CCNG2	4.4488e-06	0.00023065	1.48633	1.48633	35.1402	23.6423
PAK3	4.45939e-06	0.00023065	1.47756	1.47756	30.6035	20.7122
RTN4	4.46419e-06	0.00023065	1.32039	1.32039	290.105	219.712
KIF3C	4.468e-06	0.00023065	1.3382	1.3382	191.674	143.232
MEG8	4.49474e-06	0.00023065	1.36131	1.36131	106.041	77.8965
OTULINL	4.49894e-06	0.00023065	1.38173	1.38173	94.295	68.2439
TMEM229A	4.5008e-06	0.00023065	1.58669	1.58669	27.0019	17.0178
ATP7A	4.57142e-06	0.000233411	1.35233	1.35233	60.5569	44.7795
C1QL1	4.62235e-06	0.000233462	2.14156	2.14156	4.98188	2.32629
AURKB	4.63032e-06	0.000233462	0.713768	-1.40102	39.9255	55.9362
P4HA1	4.63402e-06	0.000233462	0.688655	-1.45211	23.3623	33.9246
GAB2	4.63943e-06	0.000233462	1.49075	1.49075	152.791	102.493
MYO1B	4.69644e-06	0.000235024	1.26633	1.26633	490.054	386.987
FAM177A1	4.71336e-06	0.000235024	1.46597	1.46597	32.3535	22.0696
STMN3	4.72106e-06	0.000235024	1.39845	1.39845	172.368	123.257
SLC35F2	4.78954e-06	0.000237585	0.706196	-1.41604	37.4542	53.0366
CADPS	4.85928e-06	0.00024019	1.53858	1.53858	38.7427	25.1808
THBS2	5.03732e-06	0.00024811	0.559514	-1.78726	11.5308	20.6085
PRCP	5.19164e-06	0.000254811	1.4334	1.4334	56.0594	39.1094
PKP4	5.23726e-06	0.000256148	0.720818	-1.38731	36.3895	50.4836
CALM1	5.28496e-06	0.000257577	1.28554	1.28554	555.656	432.236
LRIG3	5.35244e-06	0.000259957	0.687482	-1.45458	20.1331	29.2852
SHD	5.37493e-06	0.000260143	1.61092	1.61092	52.7816	32.7648
MAPK11	5.42228e-06	0.000261526	1.73266	1.73266	20.9908	12.1148
SV2C	5.49776e-06	0.000263489	1.53683	1.53683	183.04	119.102
RD3	5.51635e-06	0.000263489	1.5236	1.5236	131.482	86.297
ATP1A3	5.51968e-06	0.000263489	1.37181	1.37181	198.281	144.54
SYT4	5.61382e-06	0.000267068	2.05176	2.05176	152.554	74.353
FAM181B	5.6522e-06	0.00026798	2.21253	2.21253	6.19291	2.79901
SDCBP	5.73898e-06	0.000270453	1.37148	1.37148	64.442	46.9871
EGFLAM	5.74317e-06	0.000270453	1.68108	1.68108	28.7319	17.0913
FAT4	5.90324e-06	0.000277055	1.68609	1.68609	20.1528	11.9524
PNPLA8	5.97642e-06	0.000279548	1.43207	1.43207	40.146	28.0336
SEMA6C	6.04353e-06	0.000281185	2.1135	2.1135	4.989	2.36054
MCM7	6.05177e-06	0.000281185	0.795681	-1.25678	522.873	657.139
MAPRE3	6.11568e-06	0.000283211	1.65101	1.65101	14.4298	8.73996
HSPE1	6.15727e-06	0.000283743	0.759512	-1.31663	82.2438	108.285
SPOCK1	6.18581e-06	0.000283743	0.507026	-1.97229	3.56326	7.02777
ZBTB46	6.18824e-06	0.000283743	2.33443	2.33443	3.8569	1.65218
IFI27L2	6.24431e-06	0.000285203	1.63268	1.63268	14.2068	8.7015
EGR1	6.27748e-06	0.000285203	3.18787	3.18787	6.19786	1.9442
NBEA	6.28145e-06	0.000285203	1.28028	1.28028	247.603	193.397
IMP4	6.36773e-06	0.000287802	0.747767	-1.33731	57.8813	77.4056
EPOP	6.39152e-06	0.000287802	0.694764	-1.43934	19.3261	27.8168
FAM162A	6.40064e-06	0.000287802	0.676108	-1.47905	18.0242	26.6587
NPM1	6.57101e-06	0.000293437	0.7627	-1.31113	793.463	1040.33
DCTPP1	6.58787e-06	0.000293437	0.771772	-1.29572	91.0585	117.986
ADAMTSL2	6.58911e-06	0.000293437	2.16929	2.16929	20.1042	9.26765
SIX4	6.61229e-06	0.000293531	0.543586	-1.83963	5.13573	9.44786
ITGA1	6.67293e-06	0.000293832	1.45109	1.45109	63.5962	43.8264
MRAP2	6.6806e-06	0.000293832	1.69387	1.69387	48.162	28.433
PLEKHO2	6.6823e-06	0.000293832	1.64363	1.64363	13.5177	8.2243
SHMT2	6.71588e-06	0.000294379	0.787709	-1.2695	237.708	301.771
H2BC9	6.8619e-06	0.000299136	0.746014	-1.34046	215.534	288.914
KIF1B	6.86732e-06	0.000299136	1.3176	1.3176	162.095	123.023
RPL35	6.90638e-06	0.0002999	0.7923	-1.26215	398.478	502.938
KLHL13	7.02586e-06	0.000304141	1.27188	1.27188	324.82	255.385
ENO1	7.21061e-06	0.000311172	0.791801	-1.26294	934.19	1179.83
NPM1P39	7.24926e-06	0.000311875	0.736564	-1.35765	39.5003	53.6277
LDHA	7.33042e-06	0.000314396	0.75376	-1.32668	586.698	778.362
TIMP1	7.38252e-06	0.000315176	1.66538	1.66538	10.9971	6.60334
ATP5MC1	7.39383e-06	0.000315176	0.753728	-1.32674	73.5111	97.53
RNF11	7.46901e-06	0.000315181	1.26942	1.26942	107.267	84.5009
CTNNAL1	7.47221e-06	0.000315181	0.714873	-1.39885	42.5519	59.5237
EPB41L4B	7.47408e-06	0.000315181	1.63215	1.63215	13.8598	8.49174
TWNK	7.48439e-06	0.000315181	0.730992	-1.368	38.5563	52.7452
TMEM97	7.56324e-06	0.000317542	0.79529	-1.2574	168.762	212.202
IPO4	7.63039e-06	0.000318502	0.687161	-1.45526	48.0732	69.9591
SYP	7.63179e-06	0.000318502	1.34679	1.34679	78.4009	58.2133
PCOLCE	7.73519e-06	0.000321853	1.36722	1.36722	133.105	97.3545
RTL8C	7.81556e-06	0.000323282	1.37262	1.37262	59.9971	43.7099
ATP6AP1	7.81591e-06	0.000323282	1.30251	1.30251	73.6629	56.5545
COQ8A	7.88559e-06	0.000325199	0.700542	-1.42747	45.3405	64.7221
TNS3	7.90957e-06	0.000325226	1.70564	1.70564	77.6254	45.5109
SYTL4	8.13227e-06	0.000333399	1.69288	1.69288	12.3749	7.30996
DNM3	8.16333e-06	0.000333691	1.77887	1.77887	20.1338	11.3183
NCAPD2	8.31723e-06	0.000338909	0.788817	-1.26772	196.754	249.429
TCTA	8.33962e-06	0.000338909	1.49881	1.49881	18.8519	12.5779
GPRASP2	8.4414e-06	0.000341974	1.29694	1.29694	104.944	80.9166
CLSTN3	8.46411e-06	0.000341974	1.54859	1.54859	25.8021	16.6617
HEY1	8.57823e-06	0.000345584	1.36923	1.36923	65.9615	48.1741
SLC2A1	8.74765e-06	0.000351393	0.741242	-1.34909	31.4148	42.3813
WDR46	8.80803e-06	0.000352802	0.742898	-1.34608	49.9559	67.2446
MAP1LC3A	8.88443e-06	0.000354843	1.95557	1.95557	14.6905	7.51214
FLOT1	8.94098e-06	0.000354937	1.29444	1.29444	96.8311	74.8056
H2BC8	8.96556e-06	0.000354937	0.781988	-1.27879	336.588	430.426
PDP1	9.01802e-06	0.000354937	1.33298	1.33298	56.0338	42.0366
CHRNA5	9.02023e-06	0.000354937	1.35242	1.35242	68.9272	50.9659
SMIM14	9.03546e-06	0.000354937	1.47173	1.47173	31.3748	21.3183
SMPD1	9.03957e-06	0.000354937	1.73698	1.73698	10.2035	5.87427
FKBP4	9.15632e-06	0.000357044	0.782461	-1.27802	273.158	349.101
ATP6AP2	9.15645e-06	0.000357044	1.29472	1.29472	70.8463	54.7195
DBNL	9.17008e-06	0.000357044	1.30912	1.30912	99.1689	75.7524
SMO	9.26876e-06	0.000359591	0.741283	-1.34901	38.2755	51.6341
KIF20A	9.2871e-06	0.000359591	0.80357	-1.24445	132.522	164.917
IRS2	9.37005e-06	0.000361289	1.42843	1.42843	180.142	126.112
KAT6B	9.38279e-06	0.000361289	1.46761	1.46761	65.9687	44.9497
PCYOX1	9.44977e-06	0.000362854	1.34945	1.34945	54.3222	40.2551
ERC1	9.47998e-06	0.000362854	1.38705	1.38705	75.5005	54.4322
SLIT2	9.53398e-06	0.000362854	0.602717	-1.65915	7.34824	12.1919
ATP6V0D1	9.54608e-06	0.000362854	1.42292	1.42292	75.938	53.3678
FKBP1B	9.55916e-06	0.000362854	1.463	1.463	22.3663	15.288
ZBTB38	9.57962e-06	0.000362854	1.39767	1.39767	86.6688	62.0096
NDFIP1	9.74191e-06	0.000365938	1.30048	1.30048	134.749	103.615
ARMCX3	9.74681e-06	0.000365938	1.39191	1.39191	55.3819	39.7883
IRF6	9.75643e-06	0.000365938	1.95544	1.95544	8.09783	4.14118
NRCAM	9.76605e-06	0.000365938	1.2913	1.2913	473.582	366.749
MAPK8IP1	9.94601e-06	0.000371682	1.35676	1.35676	78.4027	57.7866
SLC6A15	1.02264e-05	0.00038114	0.780794	-1.28075	85.0085	108.874
ACVRL1	1.04021e-05	0.000386653	1.76032	1.76032	15.3354	8.71171
RAB5B	1.08512e-05	0.000400961	1.36739	1.36739	52.9557	38.7275
NOLC1	1.08518e-05	0.000400961	0.795834	-1.25654	278.913	350.466
PTPRM	1.0915e-05	0.000400961	1.56062	1.56062	19.9979	12.8141
H3C11	1.09245e-05	0.000400961	0.795982	-1.25631	138.395	173.867
KCNH6	1.09309e-05	0.000400961	2.19498	2.19498	21.3168	9.71162
OAF	1.09888e-05	0.000401546	0.570226	-1.75369	7.35234	12.8937
ACSS2	1.1044e-05	0.000401546	1.40678	1.40678	32.0205	22.7616
RIMS3	1.10588e-05	0.000401546	1.29625	1.29625	245.372	189.294
XPO5	1.1062e-05	0.000401546	0.802863	-1.24554	127.039	158.232
APP	1.12016e-05	0.000403702	1.26952	1.26952	619.851	488.254
ATAT1	1.12076e-05	0.000403702	1.57872	1.57872	13.9325	8.82518
MXD4	1.12103e-05	0.000403702	1.49124	1.49124	35.3225	23.6866
TCEAL7	1.12373e-05	0.000403702	1.35785	1.35785	75.353	55.4942
DACT3	1.15221e-05	0.000412871	1.51693	1.51693	23.0579	15.2004
MYO18A	1.16259e-05	0.000415521	1.40915	1.40915	42.5499	30.1955
ILK	1.18196e-05	0.000419783	1.32153	1.32153	76.1156	57.5967
PALM	1.1825e-05	0.000419783	1.41292	1.41292	71.0626	50.2948
C2orf16	1.18686e-05	0.000419783	1.9229	1.9229	10.3371	5.3758
PCDHA4	1.18888e-05	0.000419783	1.73342	1.73342	20.2099	11.659
TPM1	1.19105e-05	0.000419783	1.40269	1.40269	79.0317	56.3428
RPS2P5	1.19297e-05	0.000419783	0.771296	-1.29652	519.395	673.406
PINK1	1.19559e-05	0.000419783	1.54798	1.54798	16.4197	10.6072
EPB41L5	1.20209e-05	0.000421002	1.48868	1.48868	64.4586	43.2991
CAP2	1.20979e-05	0.000422637	1.53742	1.53742	18.9576	12.3307
CACNA2D1	1.21297e-05	0.000422689	1.31397	1.31397	230.196	175.191
TSPAN17	1.22055e-05	0.000424272	1.35071	1.35071	38.1913	28.2749
TMEM100	1.22842e-05	0.000425571	1.55253	1.55253	21.1693	13.6353
ARMCX1	1.2304e-05	0.000425571	1.40991	1.40991	39.2492	27.8382
MAPRE2	1.2535e-05	0.00043249	1.33931	1.33931	65.8798	49.1893
WDR77	1.26341e-05	0.000432934	0.778617	-1.28433	56.4557	72.5076
TBC1D9	1.26405e-05	0.000432934	1.31524	1.31524	73.3709	55.7852
GNAQ	1.26411e-05	0.000432934	1.29943	1.29943	195.634	150.553
SOS2	1.27253e-05	0.000434475	1.3192	1.3192	50.043	37.9344
IARS1	1.27748e-05	0.000434475	0.813981	-1.22853	338.263	415.567
PTPRN2	1.27796e-05	0.000434475	1.46901	1.46901	36.7201	24.9964
SPINT2	1.2941e-05	0.000438247	2.25574	2.25574	5.71466	2.53338
IGFBP5	1.29534e-05	0.000438247	1.32149	1.32149	112.617	85.2201
HMGA1	1.32345e-05	0.000446178	0.793907	-1.25959	189.775	239.039
TPI1	1.32519e-05	0.000446178	0.821389	-1.21745	603.154	734.31
DDAH2	1.33077e-05	0.000446531	1.39574	1.39574	55.8218	39.9945
CAPN1	1.33496e-05	0.000446531	1.37392	1.37392	79.5351	57.8892
KLHL9	1.33584e-05	0.000446531	1.25319	1.25319	118.002	94.1612
HDAC11	1.35704e-05	0.000452531	1.92804	1.92804	9.02639	4.68164
LTA4H	1.38282e-05	0.000459461	0.725606	-1.37816	64.8034	89.3094
PRSS3	1.38441e-05	0.000459461	1.34656	1.34656	65.4876	48.6332
ITGB1	1.40578e-05	0.000465443	1.24474	1.24474	446.864	359
GATA2	1.41373e-05	0.000466966	1.36941	1.36941	356.838	260.577
B3GNT2	1.42471e-05	0.000469481	1.32682	1.32682	66.1213	49.8344
TUBA1A	1.43745e-05	0.000470822	1.35837	1.35837	3131.77	2305.54
CLU	1.43924e-05	0.000470822	1.67675	1.67675	13.8174	8.24059
TGFB1I1	1.44008e-05	0.000470822	1.66394	1.66394	10.8774	6.53713
RHOB	1.44229e-05	0.000470822	1.39124	1.39124	89.0915	64.0377
MTHFD1	1.46465e-05	0.000477003	0.791229	-1.26386	144.122	182.149
COL26A1	1.46963e-05	0.000477252	1.52632	1.52632	23.7755	15.577
TM7SF2	1.47226e-05	0.000477252	1.66848	1.66848	24.4453	14.6513
TP53I3	1.48982e-05	0.000481823	1.41796	1.41796	56.0039	39.4961
STX12	1.50322e-05	0.000484348	1.42019	1.42019	27.116	19.0932
SH3TC1	1.50458e-05	0.000484348	1.89282	1.89282	7.48126	3.95244
ATP6V1G2	1.51408e-05	0.000486286	1.77618	1.77618	7.28232	4.09999
MDH2	1.51907e-05	0.000486767	0.803351	-1.24479	172.614	214.868
SHF	1.52642e-05	0.000487998	1.33385	1.33385	56.2762	42.1907
THSD4	1.53058e-05	0.000488211	1.97334	1.97334	6.22083	3.15244
SLC38A5	1.53954e-05	0.000489169	0.67666	-1.47785	14.7778	21.8392
NACAD	1.54061e-05	0.000489169	1.57672	1.57672	56.0366	35.5399
ITFG1	1.55292e-05	0.000491958	1.35161	1.35161	56.8369	42.0511
MYRIP	1.56806e-05	0.000495303	2.06714	2.06714	7.18402	3.47535
ARHGAP26	1.57484e-05	0.000495303	1.55241	1.55241	36.2947	23.3795
CHST1	1.58162e-05	0.000495303	1.97377	1.97377	5.25398	2.66191
KIFBP	1.58296e-05	0.000495303	1.34512	1.34512	34.0896	25.3433
LIMK1	1.58464e-05	0.000495303	1.43369	1.43369	39.2279	27.3615
PLCB4	1.5848e-05	0.000495303	1.2792	1.2792	155.536	121.588
CAMKV	1.60141e-05	0.000499374	0.745691	-1.34104	73.1836	98.142
NPM3	1.62314e-05	0.000502162	0.694569	-1.43974	15.4808	22.2884
MYH15	1.62319e-05	0.000502162	2.09889	2.09889	6.65231	3.16944
ZNF792	1.62513e-05	0.000502162	1.55111	1.55111	55.6365	35.8688
GLCCI1	1.62722e-05	0.000502162	1.33617	1.33617	91.5845	68.5425
RBM24	1.62836e-05	0.000502162	1.97134	1.97134	6.276	3.18361
PRDX6	1.64078e-05	0.000504874	0.788343	-1.26848	138.513	175.701
TSC22D3	1.64909e-05	0.000506222	1.35544	1.35544	52.2037	38.5141
PRELID1	1.65242e-05	0.000506222	0.803661	-1.24431	96.4228	119.979
FAM160A1	1.66262e-05	0.000508229	0.605271	-1.65215	8.41401	13.9012
SYNPO2	1.67724e-05	0.0005114	1.30781	1.30781	486.193	371.76
CDH11	1.68124e-05	0.0005114	1.38271	1.38271	212.379	153.596
HS3ST4	1.684e-05	0.0005114	0.382729	-2.61282	1.16793	3.05158
RAB3B	1.69183e-05	0.00051266	2.60578	2.60578	16.0922	6.1756
LYST	1.70566e-05	0.00051573	1.90175	1.90175	9.71319	5.10752
CD47	1.74113e-05	0.000524944	1.25424	1.25424	149.821	119.451
HS6ST3	1.74366e-05	0.000524944	2.25675	2.25675	4.67928	2.07346
TBX3	1.75605e-05	0.000527536	1.4406	1.4406	402.372	279.309
RPS10	1.76248e-05	0.000528326	0.808791	-1.23641	232.464	287.422
RPL12	1.79438e-05	0.000536735	0.785115	-1.2737	280.771	357.617
ANK2	1.8001e-05	0.000537293	1.57095	1.57095	684.474	435.706
ALDOA	1.80856e-05	0.000538666	0.81504	-1.22693	409.073	501.905
CACNB1	1.81541e-05	0.00053899	1.50096	1.50096	17.5953	11.7227
EPM2AIP1	1.81738e-05	0.00053899	1.30407	1.30407	83.883	64.3241
PLPP3	1.83969e-05	0.00054385	2.49364	2.49364	9.68283	3.88302
TP53INP2	1.84158e-05	0.00054385	1.83931	1.83931	6.7845	3.68861
[truncated: 13,467 more rows]

## Sheet: SHEPtetMYCN_dox_48h
Gene symbol	Total counts	P-value (Dox vs. Ctrl)	FDR step up (Dox vs. Ctrl)	Ratio (Dox vs. Ctrl)	Fold change (Dox vs. Ctrl)	LSMean(Dox) (Dox vs. Ctrl)	LSMean(Ctrl) (Dox vs. Ctrl)
[truncated: 12,168 more rows]

[truncated: 1 more sheets: siMYCN_RH4]
