# Supplementary material for: MYCN drives oncogenesis by cooperating with the histone methyltransferase G9a and the WDR5 adaptor to orchestrate global gene transcription
Source: PLoS Biol. 2024 Mar 28;22(3):e3002240. doi: 10.1371/journal.pbio.3002240 (PMC11003700; doi:10.1371/journal.pbio.3002240)
Supplement: S2 Table — (XLSX) [file pbio.3002240.s009.xlsx]

## Sheet: IMR32_AllActiveEnhancers_GREAT
Table S2. GREAT GO analysis of active enhancers with or without MYCN binding, as well as MYCN-bound promoters in IMR32 cells.
GREAT assay of all active enhancers
# GREAT version 4.0.4	Species assembly: hg19	Association rule: Basal+extension: 5000 bp upstream, 1000 bp downstream, 1000000 bp max extension, curated regulatory domains included
# Term Name	Binom Rank	Binom Raw P-Value	Binom FDR Q-Val	Binom Fold Enrichment	Binom Observed Region Hits	Binom Region Set Coverage	Hyper Rank	Hyper FDR Q-Val	Hyper Fold Enrichment	Hyper Observed Gene Hits	Hyper Total Genes	Hyper Gene Set Coverage
noradrenergic neuron differentiation	2	2.28037e-143	1.49877e-139	6.21785	327	0.0142627	920	0.0292702	2.42091	7	7	0.0009136
autonomic nervous system development	10	4.24319e-120	5.57768e-117	2.95325	634	0.027653	610	0.00321116	1.68901	30	43	0.00391543
sympathetic nervous system development	11	8.42448e-118	1.00673e-114	3.38974	510	0.0222445	498	0.000964845	2.07506	18	21	0.00234926
artery morphogenesis	88	6.71596e-54	1.0032e-51	2.10096	537	0.0234222	703	0.00839334	1.54437	37	58	0.00482903
negative regulation of ossification	120	3.93036e-43	4.30539e-41	2.05357	451	0.0196711	566	0.00199341	1.5563	45	70	0.00587314
aorta development	202	2.00545e-33	1.30503e-31	2.06284	342	0.0149169	620	0.00355373	1.66774	31	45	0.00404594
axon extension	270	7.21268e-29	3.51151e-27	2.02168	308	0.0134339	606	0.00304638	1.78008	25	34	0.00326286
positive regulation of calcium ion transmembrane transporter activity	280	2.56004e-28	1.20185e-26	2.21282	244	0.0106425	713	0.00965972	1.70888	24	34	0.00313234
aorta morphogenesis	285	7.46314e-28	3.44221e-26	2.13482	260	0.0113403	534	0.0016231	1.90214	22	28	0.00287131
semaphorin-plexin signaling pathway	323	1.64252e-25	6.68451e-24	2.205	220	0.00959567	1010	0.0429638	1.71481	17	24	0.00221874
positive regulation of vascular permeability	324	1.6524e-25	6.70396e-24	3.40854	104	0.00453614	684	0.00670967	2.42091	9	9	0.00117463
embryonic camera-type eye morphogenesis	416	4.21134e-22	1.33072e-20	2.05574	222	0.00968291	437	0.000439507	2.03356	21	25	0.0027408
lung epithelial cell differentiation	448	6.3469e-21	1.86228e-19	2.0408	213	0.00929036	733	0.0119043	1.8707	17	22	0.00221874
regulation of pri-miRNA transcription from RNA polymerase II promoter	450	7.83627e-21	2.28906e-19	2.1079	196	0.00854887	962	0.0328601	1.66959	20	29	0.00261028
regulation of vascular permeability	467	2.59591e-20	7.3069e-19	2.17689	177	0.00772016	846	0.0216633	1.69464	21	30	0.0027408
synaptic transmission, cholinergic	478	6.0957e-20	1.67632e-18	2.26497	159	0.00693505	741	0.0121385	1.75307	21	29	0.0027408
regulation of glial cell proliferation	557	1.09332e-17	2.58019e-16	2.09096	167	0.00728399	936	0.0300885	1.7036	19	27	0.00247977
acetylcholine receptor signaling pathway	679	2.05818e-15	3.9845e-14	2.04098	152	0.00662974	446	0.000511737	2.09078	19	22	0.00247977
lacrimal gland development	698	7.15904e-15	1.34822e-13	2.31201	110	0.00479784	920	0.0292702	2.42091	7	7	0.0009136
spongiotrophoblast layer development	1051	3.88971e-11	4.86491e-10	2.14554	93	0.00405635	701	0.00832134	2.21917	11	12	0.00143566
trophoblast giant cell differentiation	1152	1.601e-10	1.82684e-09	2.05856	96	0.0041872	471	0.000685176	2.42091	12	12	0.00156617
chromatin silencing at rDNA	1393	5.35549e-09	5.05369e-08	2.48812	53	0.00231168	622	0.00356149	1.74843	26	36	0.00339337
negative regulation of protein kinase activity by regulation of protein phosphorylation	1531	2.96097e-08	2.54225e-07	2.13084	66	0.0028787	768	0.0144757	2.42091	8	8	0.00104411
diol metabolic process	2480	9.3328e-05	0.000494676	2.00472	37	0.00161382	1037	0.0472039	2.01742	10	12	0.00130514

## Sheet: IMR32_ActiveEnhancerWithoutMYCN
GREAT assay of active enhancers that not bound by MYCN
# GREAT version 4.0.4	Species assembly: hg19	Association rule: Basal+extension: 5000 bp upstream, 1000 bp downstream, 1000000 bp max extension, curated regulatory domains included
# Term Name	Binom Rank	Binom Raw P-Value	Binom FDR Q-Val	Binom Fold Enrichment	Binom Observed Region Hits	Binom Region Set Coverage	Hyper Rank	Hyper FDR Q-Val	Hyper Fold Enrichment	Hyper Observed Gene Hits	Hyper Total Genes	Hyper Gene Set Coverage
noradrenergic neuron differentiation	1	1.88514e-128	2.47802e-124	6.57891	279	0.0150909	827	0.0197108	2.60081	7	7	0.000981492
sympathetic nervous system development	6	1.48728e-104	3.25837e-101	3.52774	428	0.0231502	427	0.000352083	2.22927	18	21	0.00252384
autonomic nervous system development	8	5.73487e-102	9.42311e-99	3.00958	521	0.0281804	487	0.000830097	1.81452	30	43	0.00420639
artery morphogenesis	83	1.70595e-45	2.70177e-43	2.12508	438	0.023691	735	0.0105289	1.56946	35	58	0.00490746
negative regulation of ossification	110	7.71215e-40	9.21602e-38	2.13443	378	0.0204457	483	0.000814635	1.6348	44	70	0.00616938
sympathetic ganglion development	133	2.02776e-34	2.00413e-32	3.13093	161	0.00870835	975	0.0380721	2.31183	8	9	0.0011217
DNA replication-dependent nucleosome assembly	144	2.81752e-33	2.57197e-31	7.96557	60	0.00324535	873	0.0252271	1.70678	21	32	0.00294448
aorta development	198	1.11815e-28	7.42325e-27	2.09437	280	0.015145	682	0.00701156	1.67608	29	45	0.00406618
positive regulation of calcium ion transmembrane transporter activity	202	2.13927e-28	1.39211e-26	2.37299	211	0.0114128	726	0.00960434	1.75937	23	34	0.0032249
cardiac right ventricle morphogenesis	244	5.3818e-26	2.89934e-24	2.29854	205	0.0110883	906	0.028491	1.91639	14	19	0.00196298
positive regulation of neural precursor cell proliferation	272	2.03148e-24	9.81758e-23	2.00696	262	0.0141713	751	0.0109365	1.62551	30	48	0.00420639
aorta morphogenesis	286	6.06957e-24	2.78967e-22	2.16882	213	0.011521	568	0.00214822	1.95061	21	28	0.00294448
positive regulation of vascular permeability	344	1.59766e-21	6.10501e-20	3.45471	85	0.00459758	621	0.00387558	2.60081	9	9	0.00126192
regulation of vascular permeability	401	2.70309e-19	8.86088e-18	2.28776	150	0.00811337	712	0.00841146	1.82057	21	30	0.00294448
cell-cell signaling involved in cardiac conduction	419	8.30749e-19	2.60625e-17	2.06009	185	0.0100065	761	0.0133339	1.8302	19	27	0.00266405
semaphorin-plexin signaling pathway	444	2.09927e-18	6.21508e-17	2.11296	170	0.00919515	840	0.0205263	1.84224	17	24	0.00238362
embryonic camera-type eye morphogenesis	461	7.63408e-18	2.17679e-16	2.04406	178	0.00962787	754	0.0120216	1.87259	18	25	0.00252384
ventricular cardiac muscle cell action potential	487	3.50661e-17	9.46497e-16	2.29622	131	0.00708568	906	0.028491	1.91639	14	19	0.00196298
regulation of cardiac muscle contraction by regulation of the release of sequestered calcium ion	525	2.68351e-16	6.71901e-15	2.21863	133	0.00719385	794	0.0164168	1.95061	15	20	0.0021032
synaptic transmission, cholinergic	551	1.26022e-15	3.00646e-14	2.22584	126	0.00681523	773	0.0143282	1.79366	20	29	0.00280426
regulation of respiratory gaseous exchange	674	1.9571e-13	3.81692e-12	2.08104	124	0.00670705	737	0.0106341	1.92234	17	23	0.00238362
acetylcholine receptor signaling pathway	685	3.26557e-13	6.26656e-12	2.06478	124	0.00670705	387	0.000171843	2.24616	19	22	0.00266405
spongiotrophoblast layer development	768	3.44806e-12	5.90167e-11	2.3746	83	0.0044894	634	0.00435596	2.38408	11	12	0.00154234
lacrimal gland development	774	4.68029e-12	7.94863e-11	2.2937	88	0.00475984	827	0.0197108	2.60081	7	7	0.000981492
chromatin silencing at rDNA	816	1.01163e-11	1.62965e-10	3.02731	52	0.00281263	611	0.00343901	1.80612	25	36	0.00350533
G-protein coupled acetylcholine receptor signaling pathway	1039	6.20591e-10	7.85146e-09	2.02802	93	0.00503029	549	0.00181347	2.27571	14	16	0.00196298
positive regulation of extracellular matrix assembly	1047	6.72267e-10	8.44025e-09	2.32347	68	0.00367806	975	0.0380721	2.31183	8	9	0.0011217
trophoblast giant cell differentiation	1176	5.5084e-09	6.15713e-08	2.07417	78	0.00421895	422	0.000323342	2.60081	12	12	0.00168256
neuron cellular homeostasis	1537	4.24349e-07	3.62919e-06	2.02202	62	0.00335353	621	0.00387558	2.60081	9	9	0.00126192
response to heparin	1638	1.06279e-06	8.52891e-06	2.0301	57	0.00308308	1012	0.0419143	2.60081	6	6	0.000841279

## Sheet: IMR32_ActiveEnhancerWithMYCN
GREAT assay of MYCN-bound active enhancers
# GREAT version 4.0.4	Species assembly: hg19	Association rule: Basal+extension: 5000 bp upstream, 1000 bp downstream, 1000000 bp max extension, curated regulatory domains included
# Term Name	Binom Rank	Binom Raw P-Value	Binom FDR Q-Val	Binom Fold Enrichment	Binom Observed Region Hits	Binom Region Set Coverage	Hyper Rank	Hyper FDR Q-Val	Hyper Fold Enrichment	Hyper Observed Gene Hits	Hyper Total Genes	Hyper Gene Set Coverage
autonomic nervous system development	41	1.3869e-27	4.44655e-25	2.27467	222	0.021299	325	1.38847e-05	1.99821	33	43	0.00463223
noradrenergic neuron differentiation	44	1.54116e-27	4.60422e-25	3.93165	94	0.00901852	850	0.0190273	2.60373	7	7	0.000982594
sympathetic nervous system development	79	5.82933e-23	9.69956e-21	2.3977	164	0.0157344	271	3.10179e-06	2.47975	20	21	0.00280741
limb bud formation	132	1.22988e-14	1.22476e-12	2.36298	103	0.00988199	843	0.018501	2.34336	9	10	0.00126333
parasympathetic nervous system development	135	2.17558e-14	2.11837e-12	2.53891	88	0.00844287	791	0.0131308	2.02513	14	18	0.00196519
embryonic camera-type eye morphogenesis	150	2.35882e-13	2.06712e-11	2.19986	108	0.0103617	518	0.000672003	2.08299	20	25	0.00280741
preganglionic parasympathetic fiber development	173	3.53858e-12	2.68871e-10	2.51619	74	0.00709968	1036	0.0416045	1.9528	12	16	0.00168445
semaphorin-plexin signaling pathway	201	3.63872e-11	2.37965e-09	2.11646	96	0.0092104	865	0.019642	1.84431	17	24	0.0023863
nose development	225	2.42095e-10	1.41437e-08	2.64261	56	0.00537273	1036	0.0416045	1.9528	12	16	0.00168445
cell migration in hindbrain	253	1.21902e-09	6.33358e-08	2.28675	68	0.00652403	535	0.00087012	2.41775	13	14	0.00182482
semicircular canal development	301	8.1106e-09	3.54199e-07	2.38603	56	0.00537273	993	0.0370692	2.31443	8	9	0.00112297
sympathetic ganglion development	312	1.31085e-08	5.52281e-07	2.20763	64	0.00614027	652	0.00365419	2.60373	9	9	0.00126333
embryonic camera-type eye formation	363	3.99379e-08	1.44624e-06	2.18501	61	0.00585244	940	0.0272843	2.16978	10	12	0.00140371
positive regulation of vascular permeability	380	6.81446e-08	2.35727e-06	2.73951	38	0.00364578	993	0.0370692	2.31443	8	9	0.00112297
phagocytosis, recognition	384	7.28218e-08	2.49282e-06	2.45622	46	0.00441332	902	0.0236348	1.99109	13	17	0.00182482
ventral spinal cord interneuron fate commitment	454	4.2587e-07	1.23305e-05	2.06143	59	0.00566056	646	0.00348468	2.25657	13	15	0.00182482
negative regulation of hematopoietic progenitor cell differentiation	739	1.71451e-05	0.00030497	3.29584	18	0.00172695	1021	0.041266	2.60373	6	6	0.000842223
peristalsis	774	2.31873e-05	0.000393794	2.5037	27	0.00259042	573	0.00159569	2.60373	10	10	0.00140371
arterial endothelial cell differentiation	822	3.25969e-05	0.000521273	2.68122	23	0.00220666	1021	0.041266	2.60373	6	6	0.000842223
negative regulation of adherens junction organization	849	4.20304e-05	0.000650753	2.02072	40	0.00383767	1036	0.0416045	1.9528	12	16	0.00168445
vestibulocochlear nerve morphogenesis	1059	0.000205475	0.00255048	2.47387	21	0.00201477	1021	0.041266	2.60373	6	6	0.000842223
regulation of heart rate by chemical signal	1359	0.000779546	0.00754021	2.06277	25	0.00239854	1021	0.041266	2.60373	6	6	0.000842223

## Sheet: IMR32_MYCN_bound_promoters
GREAT assay of MYCN bound promoters
# GREAT version 4.0.4	Species assembly: hg19	Association rule: Basal+extension: 5000 bp upstream, 1000 bp downstream, 1000000 bp max extension, curated regulatory domains included
# Term Name	Binom Rank	Binom Raw P-Value	Binom FDR Q-Val	Binom Fold Enrichment	Binom Observed Region Hits	Binom Region Set Coverage	Hyper Rank	Hyper FDR Q-Val	Hyper Fold Enrichment	Hyper Observed Gene Hits	Hyper Total Genes	Hyper Gene Set Coverage
ncRNA processing	2	3.32696e-40	2.18664e-36	2.04592	416	0.0448083	29	1.69452e-53	1.83414	330	395	0.0390579
rRNA processing	5	6.76927e-32	1.77964e-28	2.20474	276	0.0297286	52	2.79659e-38	1.88178	216	252	0.0255652
rRNA metabolic process	7	3.37982e-31	6.34682e-28	2.16763	280	0.0301594	59	6.61648e-37	1.85635	219	259	0.0259202
nuclear-transcribed mRNA catabolic process	9	1.00193e-26	1.46338e-23	2.20569	229	0.0246661	74	1.07658e-31	1.90566	171	197	0.0202391
nuclear-transcribed mRNA catabolic process, nonsense-mediated decay	10	4.89685e-26	6.43691e-23	2.75181	146	0.015726	93	7.92662e-27	2.04782	111	119	0.0131377
mRNA catabolic process	14	6.96985e-25	6.54419e-22	2.08997	240	0.0258509	75	1.48693e-31	1.87438	181	212	0.0214227
DNA replication-dependent nucleosome assembly	16	4.13656e-24	3.39844e-21	9.78187	37	0.00398535	670	0.00342082	1.71516	25	32	0.00295893
negative regulation of gene expression, epigenetic	21	1.07817e-22	6.74882e-20	2.64332	135	0.0145411	293	1.91963e-08	1.63199	84	113	0.00994201
viral gene expression	22	1.24474e-22	7.4373e-20	2.48999	150	0.0161568	90	2.78458e-27	2.02389	118	128	0.0139662
translational initiation	23	1.81201e-22	1.0356e-19	2.31999	171	0.0184188	106	7.18081e-26	1.95147	128	144	0.0151497
chromatin silencing	24	3.76506e-22	2.06215e-19	3.07607	103	0.0110944	432	1.35854e-05	1.55508	68	96	0.00804829
viral transcription	26	6.00844e-21	3.03773e-18	2.48041	139	0.014972	85	4.72326e-29	2.09912	109	114	0.0129009
chromatin silencing at rDNA	27	1.33699e-20	6.50914e-18	5.56479	48	0.00517018	548	0.00042923	1.76852	29	36	0.00343236
regulation of hematopoietic stem cell differentiation	28	1.74218e-20	8.17891e-18	2.62921	122	0.0131409	392	1.81021e-06	1.57728	74	103	0.00875843
regulation of hematopoietic progenitor cell differentiation	30	1.64562e-19	7.21054e-17	2.46699	130	0.0140026	387	1.55196e-06	1.55427	80	113	0.00946858
cotranslational protein targeting to membrane	31	1.72297e-19	7.30594e-17	2.62363	116	0.0124946	124	4.42208e-23	2.06235	93	99	0.0110072
positive regulation of gene expression, epigenetic	32	3.13294e-19	1.28695e-16	2.82235	101	0.0108789	291	1.75909e-08	1.74026	65	82	0.00769322
protein targeting to ER	33	3.89192e-19	1.55028e-16	2.55787	119	0.0128177	126	8.11268e-23	2.04474	95	102	0.0112439
SRP-dependent cotranslational protein targeting to membrane	34	6.88962e-19	2.66365e-16	2.65193	110	0.0118483	127	1.90685e-22	2.07737	88	93	0.0104154
multi-organism metabolic process	36	2.48955e-18	9.09031e-16	2.12551	166	0.0178802	119	2.98091e-24	1.91356	129	148	0.0152681
protein localization to endoplasmic reticulum	40	1.09495e-16	3.59827e-14	2.1963	139	0.014972	142	1.36005e-19	1.89683	108	125	0.0127826
establishment of protein localization to endoplasmic reticulum	41	1.22922e-16	3.94101e-14	2.32222	123	0.0132486	125	6.83302e-23	2.02972	98	106	0.011599
ribonucleoprotein complex export from nucleus	42	1.25315e-16	3.92207e-14	2.18541	140	0.0150797	188	1.16601e-14	1.78819	101	124	0.0119541
ribonucleoprotein complex localization	44	3.54775e-16	1.05989e-13	2.14267	142	0.0152951	180	3.7314e-15	1.79466	103	126	0.0121908
translational elongation	48	1.864e-15	5.10465e-13	2.26865	119	0.0128177	226	1.48342e-11	1.73322	90	114	0.0106522
mitochondrial translation	52	4.35643e-15	1.10126e-12	2.31534	111	0.011956	225	1.16478e-11	1.7523	87	109	0.0102971
mitochondrial translational termination	53	6.78027e-15	1.68164e-12	2.53042	92	0.00990952	276	7.53395e-09	1.72673	70	89	0.008285
RNA 3'-end processing	56	1.63165e-14	3.83001e-12	2.24889	113	0.0121715	202	3.09732e-13	1.80557	88	107	0.0104154
mitochondrial translational elongation	62	7.04955e-14	1.49462e-11	2.46849	89	0.00958638	296	2.11922e-08	1.71595	68	87	0.00804829
mRNA export from nucleus	63	7.99567e-14	1.6683e-11	2.15135	118	0.01271	213	2.83985e-12	1.78118	86	106	0.0101787
telomere organization	68	4.30086e-13	8.31394e-11	2.05938	123	0.0132486	246	2.04878e-10	1.68877	90	117	0.0106522
snRNA metabolic process	69	5.99092e-13	1.14131e-10	2.34499	91	0.00980181	390	1.6019e-06	1.63379	64	86	0.00757486
DNA-templated transcription, termination	80	5.5783e-12	9.16584e-10	2.0679	110	0.0118483	284	1.16011e-08	1.65159	82	109	0.00970529
multi-organism transport	83	6.42534e-12	1.0176e-09	2.2186	93	0.0100172	327	7.77304e-08	1.76251	57	71	0.00674636
translational termination	84	8.32586e-12	1.3029e-09	2.17632	96	0.0103404	304	2.67309e-08	1.67485	74	97	0.00875843
protein refolding	85	9.76945e-12	1.51082e-09	5.06346	28	0.00301594	808	0.0161393	1.77723	17	21	0.00201207
cytoplasmic translation	88	1.85626e-11	2.77279e-09	2.97284	52	0.00560103	301	2.3772e-08	1.99118	39	43	0.00461593
intracellular transport of virus	89	2.43692e-11	3.59924e-09	2.23973	86	0.00926325	310	3.52513e-08	1.81807	53	64	0.00627293
multi-organism intracellular transport	91	2.61282e-11	3.77423e-09	2.22465	87	0.00937096	295	2.01814e-08	1.82388	54	65	0.00639129
telomere capping	102	7.13722e-11	9.19792e-09	3.35875	41	0.0044162	670	0.00342082	1.71516	25	32	0.00295893
ribosome assembly	105	8.75899e-11	1.09654e-08	2.37172	72	0.00775528	247	2.75879e-10	1.91663	55	63	0.00650965
maturation of 5.8S rRNA from tricistronic rRNA transcript (SSU-rRNA, 5.8S rRNA, LSU-rRNA)	111	1.3428e-10	1.59019e-08	4.66433	27	0.00290823	667	0.00342203	1.88178	18	21	0.00213043
negative regulation of ubiquitin-protein transferase activity	112	1.42522e-10	1.67272e-08	2.10657	91	0.00980181	380	1.26273e-06	1.64656	63	84	0.0074565
transport of virus	113	1.83905e-10	2.13932e-08	2.13619	87	0.00937096	343	1.51915e-07	1.76943	54	67	0.00639129
chaperone-mediated protein folding	114	2.33973e-10	2.69787e-08	2.31703	72	0.00775528	603	0.0011463	1.54365	45	64	0.00532607
mRNA 3'-end processing	115	2.41376e-10	2.75903e-08	2.17961	82	0.0088324	286	1.36903e-08	1.76773	62	77	0.00733815
spliceosomal snRNP assembly	117	5.85634e-10	6.57962e-08	2.78371	49	0.0052779	362	6.16976e-07	1.96431	34	38	0.00402414
ribosomal small subunit biogenesis	121	7.85616e-10	8.53465e-08	2.14582	80	0.00861698	220	5.78264e-12	1.94087	61	69	0.00721979
termination of RNA polymerase II transcription	122	8.95684e-10	9.65063e-08	2.30428	68	0.00732443	374	9.62151e-07	1.71815	54	69	0.00639129
negative regulation of ubiquitin protein ligase activity	130	1.85688e-09	1.87759e-07	2.10366	80	0.00861698	400	3.20901e-06	1.65368	58	77	0.00686472
cleavage involved in rRNA processing	131	1.9996e-09	2.00647e-07	3.75418	30	0.00323137	636	0.00179281	1.84414	21	25	0.0024855
ribosomal small subunit assembly	136	2.90762e-09	2.81034e-07	4.03065	27	0.00290823	446	2.07905e-05	2.19541	18	18	0.00213043
regulation of ubiquitin-protein ligase activity involved in mitotic cell cycle	139	4.06019e-09	3.83966e-07	2.11024	76	0.00818613	430	1.05327e-05	1.64656	54	72	0.00639129
negative regulation of ubiquitin-protein ligase activity involved in mitotic cell cycle	141	6.84471e-09	6.38112e-07	2.09497	75	0.00807841	440	1.7101e-05	1.63882	53	71	0.00627293
positive regulation of establishment of protein localization to telomere	150	1.18491e-08	1.03838e-06	8.35525	13	0.00140026	792	0.0139762	2.19541	9	9	0.00106521
tRNA modification	151	1.47086e-08	1.28042e-06	2.06651	74	0.0079707	311	3.97689e-08	1.75633	60	75	0.00710143
maturation of SSU-rRNA from tricistronic rRNA transcript (SSU-rRNA, 5.8S rRNA, LSU-rRNA)	154	1.90363e-08	1.62488e-06	2.5445	47	0.00506247	313	4.05249e-08	2.06996	33	35	0.00390579
protein heterotetramerization	158	2.56061e-08	2.13033e-06	2.43769	50	0.00538561	617	0.0014532	1.64656	33	44	0.00390579
positive regulation of protein localization to Cajal body	159	2.60244e-08	2.15152e-06	8.75063	12	0.00129255	873	0.027851	2.19541	8	8	0.000946858
DNA replication-independent nucleosome organization	162	3.64619e-08	2.95859e-06	2.20685	60	0.00646273	499	0.000139323	1.66688	41	54	0.00485265
'de novo' protein folding	165	4.10965e-08	3.27402e-06	2.63549	42	0.00452391	650	0.00283027	1.6936	27	35	0.00319564
DNA replication-independent nucleosome assembly	169	4.66449e-08	3.62809e-06	2.20741	59	0.00635502	522	0.000224167	1.65691	40	53	0.00473429
snRNA 3'-end processing	184	9.5839e-08	6.84676e-06	5.43489	16	0.00172339	767	0.0102614	2.02653	12	13	0.00142029
regulation of spindle organization	186	1.07508e-07	7.5978e-06	2.39528	47	0.00506247	595	0.0010302	1.72073	29	37	0.00343236
exonucleolytic nuclear-transcribed mRNA catabolic process involved in deadenylation-dependent decay	194	1.54463e-07	1.0466e-05	2.78063	35	0.00376993	490	9.52548e-05	1.86277	28	33	0.003314
chromatin remodeling at centromere	195	1.5463e-07	1.04237e-05	2.23204	53	0.00570875	559	0.000566565	1.67042	35	46	0.0041425
snRNA processing	206	4.715e-07	3.00867e-05	3.28791	25	0.0026928	713	0.00549452	1.8136	19	23	0.00224879
centromere complex assembly	207	5.07707e-07	3.22406e-05	2.06391	58	0.00624731	481	7.64127e-05	1.71242	39	50	0.00461593
positive regulation of protein localization to chromosome, telomeric region	212	6.03729e-07	3.7434e-05	5.42525	14	0.00150797	915	0.03551	1.99582	10	11	0.00118357
nuclear-transcribed mRNA catabolic process, exonucleolytic	214	6.89713e-07	4.23658e-05	2.56168	36	0.00387764	504	0.000161195	1.81905	29	35	0.00343236
purine ribonucleoside triphosphate biosynthetic process	222	1.13077e-06	6.69551e-05	2.17665	48	0.00517018	837	0.0197518	1.47768	35	52	0.0041425
tRNA export from nucleus	228	1.53657e-06	8.85889e-05	2.19282	46	0.00495476	248	2.75107e-10	2.19541	33	33	0.00390579
CENP-A containing nucleosome assembly	232	1.6796e-06	9.51653e-05	2.16446	47	0.00506247	601	0.00112934	1.67269	32	42	0.00378743
regulation of mitotic spindle organization	233	1.80351e-06	0.000101748	2.29855	41	0.0044162	650	0.00283027	1.6936	27	35	0.00319564
maturation of LSU-rRNA	237	2.40247e-06	0.000133251	2.67563	30	0.00323137	561	0.000572606	1.92098	21	24	0.0024855
purine nucleoside triphosphate biosynthetic process	238	2.99508e-06	0.000165422	2.06239	50	0.00538561	789	0.0138232	1.49122	36	53	0.00426086
transcription from RNA polymerase III promoter	239	3.07773e-06	0.000169275	2.13406	46	0.00495476	555	0.000517685	1.71349	32	41	0.00378743
ncRNA 3'-end processing	257	4.19292e-06	0.000214459	2.8987	25	0.0026928	537	0.000307696	1.93196	22	25	0.00260386
spliceosomal tri-snRNP complex assembly	261	5.23697e-06	0.000263755	4.20899	15	0.00161568	831	0.0193029	2.01246	11	12	0.00130193
tRNA transport	270	7.9097e-06	0.000385085	2.03682	47	0.00506247	267	2.2703e-09	2.13268	34	35	0.00402414
maturation of 5.8S rRNA	278	1.16972e-05	0.000553094	2.19284	38	0.00409306	552	0.00049189	1.79624	27	33	0.00319564
IRES-dependent translational initiation	288	1.6977e-05	0.00077487	4.03193	14	0.00150797	831	0.0193029	2.01246	11	12	0.00130193
DNA unwinding involved in DNA replication	297	2.64212e-05	0.00116938	5.35156	10	0.00107712	873	0.027851	2.19541	8	8	0.000946858
mitochondrial electron transport, NADH to ubiquinone	303	3.28637e-05	0.00142572	2.06539	39	0.00420078	821	0.0178755	1.49288	34	50	0.00402414
telomere maintenance via telomere lengthening	306	3.68882e-05	0.00158463	2.23946	32	0.00344679	700	0.00481725	1.77321	21	26	0.0024855
regulation of mitochondrial translation	317	4.46322e-05	0.00185076	3.05715	18	0.00193882	725	0.00608292	1.93712	15	17	0.00177536
cytoplasmic translational initiation	318	4.56172e-05	0.00188565	3.31574	16	0.00172339	712	0.00539509	2.03859	13	14	0.00153864
histone mRNA metabolic process	351	0.000142808	0.00534818	2.27874	26	0.00280052	663	0.00319939	1.82951	20	24	0.00236714
protein exit from endoplasmic reticulum	362	0.00018732	0.006802	2.28027	25	0.0026928	635	0.00178788	1.96431	17	19	0.00201207
mitochondrial DNA metabolic process	372	0.000207775	0.00734193	3.0231	15	0.00161568	915	0.03551	1.99582	10	11	0.00118357
rRNA methylation	373	0.000208454	0.00734618	2.26374	25	0.0026928	922	0.0357612	1.69645	17	22	0.00201207
pseudouridine synthesis	391	0.000287499	0.0096654	2.41063	21	0.00226196	543	0.00038526	2.07344	17	18	0.00201207
protein-DNA complex disassembly	400	0.000334211	0.010983	2.11787	27	0.00290823	865	0.0271294	1.75633	16	20	0.00189372
retrograde protein transport, ER to cytosol	401	0.000350025	0.011474	2.27022	23	0.00247738	619	0.0014587	2.05819	15	16	0.00177536
establishment of protein localization to mitochondrial membrane	431	0.000536528	0.0163635	2.41317	19	0.00204653	831	0.0193029	2.01246	11	12	0.00130193
rRNA-containing ribonucleoprotein complex export from nucleus	453	0.00071919	0.0208692	2.41911	18	0.00193882	839	0.0198805	1.90269	13	15	0.00153864
anterograde synaptic vesicle transport	511	0.00128784	0.0331285	2.29409	18	0.00193882	896	0.0314758	1.80798	14	17	0.001657
nucleotide-excision repair, DNA damage recognition	518	0.00133573	0.033896	2.04919	23	0.00247738	713	0.00549452	1.8136	19	23	0.00224879
positive regulation of telomerase RNA localization to Cajal body	527	0.00155771	0.0388541	2.317	17	0.00183111	839	0.0198805	1.90269	13	15	0.00153864
ribosomal protein import into nucleus	545	0.00176646	0.0426057	2.43848	15	0.00161568	873	0.027851	2.19541	8	8	0.000946858
