# Supplementary material for: MYCN drives oncogenesis by cooperating with the histone methyltransferase G9a and the WDR5 adaptor to orchestrate global gene transcription
Source: PLoS Biol. 2024 Mar 28;22(3):e3002240. doi: 10.1371/journal.pbio.3002240 (PMC11003700; doi:10.1371/journal.pbio.3002240)
Supplement: S3 Table — (XLSX) [file pbio.3002240.s010.xlsx]

## Sheet: RH4_AllActiveEnhancers_GREAT
Table S3. GREAT GO analysis of active enhancers with or without MYCN binding, as well as MYCN-bound promoters in RH4 cells.
GREAT assay of all active enhancers
# GREAT version 4.0.4	Species assembly: hg19	Association rule: Basal+extension: 5000 bp upstream, 1000 bp downstream, 1000000 bp max extension, curated regulatory domains included
# Term Name	Binom Rank	Binom Raw P-Value	Binom FDR Q-Val	Binom Fold Enrichment	Binom Observed Region Hits	Binom Region Set Coverage	Hyper Rank	Hyper FDR Q-Val	Hyper Fold Enrichment	Hyper Observed Gene Hits	Hyper Total Genes	Hyper Gene Set Coverage
regulation of fibroblast growth factor receptor signaling pathway	332	2.10071e-61	8.31742e-60	2.03295	670	0.0147632	808	0.0180851	1.56328	22	26	0.00219124
regulation of pri-miRNA transcription from RNA polymerase II promoter	408	1.16008e-52	3.73755e-51	2.31451	426	0.00938677	822	0.0196768	1.52897	24	29	0.00239044
substrate adhesion-dependent cell spreading	455	1.62529e-47	4.69547e-46	2.19795	428	0.00943084	843	0.0208993	1.45856	30	38	0.00298805
pharyngeal system development	467	1.6531e-46	4.65311e-45	2.10558	462	0.01018	882	0.0261808	1.55191	21	25	0.00209163
heart trabecula morphogenesis	554	5.68457e-40	1.3488e-38	2.01777	438	0.00965119	918	0.028661	1.46714	27	34	0.00268924
platelet-derived growth factor receptor signaling pathway	561	2.06047e-39	4.82797e-38	2.02074	430	0.00947491	991	0.0394969	1.45561	26	33	0.00258964
striated muscle cell proliferation	580	3.43627e-38	7.78789e-37	2.33283	300	0.0066104	849	0.0212153	1.72434	14	15	0.00139442
epithelial cell differentiation involved in prostate gland development	610	1.0934e-36	2.35619e-35	2.30081	296	0.00652227	743	0.0111537	1.84751	12	12	0.00119522
membranous septum morphogenesis	615	1.66887e-36	3.56705e-35	2.39181	272	0.00599343	1048	0.0499348	1.84751	9	9	0.000896414
prostate glandular acinus development	618	1.98221e-36	4.21621e-35	2.54474	241	0.00531036	813	0.0188418	1.84751	11	11	0.00109562
trabecula formation	678	7.4607e-34	1.44647e-32	2.24354	287	0.00632395	973	0.0372643	1.53959	20	24	0.00199203
myoblast fusion	805	7.67406e-29	1.25311e-27	2.1478	267	0.00588326	909	0.0288919	1.64223	16	18	0.00159362
muscle cell proliferation	817	1.37888e-28	2.21852e-27	2.01162	310	0.00683075	603	0.00318931	1.75027	18	19	0.00179283
wound healing, spreading of epidermal cells	841	8.49404e-28	1.32764e-26	2.7481	158	0.00348148	1048	0.0499348	1.84751	9	9	0.000896414
positive regulation of adherens junction organization	866	9.67294e-27	1.46825e-25	2.04791	276	0.00608157	808	0.0180851	1.56328	22	26	0.00219124
regulation of extracellular matrix assembly	876	1.55681e-26	2.33611e-25	2.16038	241	0.00531036	678	0.00661232	1.84751	13	13	0.00129482
positive regulation of focal adhesion assembly	908	8.65416e-26	1.25285e-24	2.04633	266	0.00586123	973	0.0372643	1.53959	20	24	0.00199203
cardiac muscle cell proliferation	974	1.49076e-24	2.01192e-23	2.054	250	0.00550867	944	0.0330903	1.71555	13	14	0.00129482
pulmonary valve morphogenesis	1012	1.18876e-23	1.54409e-22	2.15582	214	0.00471542	743	0.0111537	1.84751	12	12	0.00119522
branching involved in prostate gland morphogenesis	1193	1.4482e-20	1.59569e-19	2.07599	201	0.00442897	931	0.0304123	1.84751	10	10	0.000996016

## Sheet: RH4_ActiveEnhancerWithoutMYCN
GREAT assay of active enhancers that not bound by MYCN
# GREAT version 4.0.4	Species assembly: hg19	Association rule: Basal+extension: 5000 bp upstream, 1000 bp downstream, 1000000 bp max extension, curated regulatory domains included
# Term Name	Binom Rank	Binom Raw P-Value	Binom FDR Q-Val	Binom Fold Enrichment	Binom Observed Region Hits	Binom Region Set Coverage	Hyper Rank	Hyper FDR Q-Val	Hyper Fold Enrichment	Hyper Observed Gene Hits	Hyper Total Genes	Hyper Gene Set Coverage
regulation of pri-miRNA transcription from RNA polymerase II promoter	430	2.31525e-44	7.07767e-43	2.24028	382	0.00908572	819	0.0161832	1.54529	24	29	0.00241595
substrate adhesion-dependent cell spreading	437	1.21305e-43	3.64886e-42	2.18958	395	0.00939492	835	0.0167929	1.47412	30	38	0.00301993
pharyngeal system development	451	2.99103e-42	8.71775e-41	2.09077	425	0.0101085	870	0.0221949	1.56847	21	25	0.00211395
platelet-derived growth factor receptor signaling pathway	482	1.10214e-39	3.00574e-38	2.06962	408	0.00970412	956	0.033588	1.47115	26	33	0.00261727
protein kinase B signaling	491	4.17958e-39	1.11895e-37	2.14784	368	0.00875273	1055	0.0463746	1.38012	34	46	0.00342259
striated muscle cell proliferation	508	3.47145e-38	8.98271e-37	2.39219	285	0.00677861	848	0.018503	1.74274	14	15	0.0014093
membranous septum morphogenesis	581	5.81802e-34	1.31632e-32	2.39193	252	0.00599372	1032	0.0460874	1.86722	9	9	0.000905979
trabecula formation	689	4.24039e-29	8.08998e-28	2.18545	259	0.00616021	946	0.0323847	1.55602	20	24	0.00201329
muscle cell proliferation	692	4.59183e-29	8.72248e-28	2.06631	295	0.00701646	591	0.00271758	1.76895	18	19	0.00181196
myoblast fusion	773	2.11205e-26	3.59158e-25	2.13603	246	0.00585101	899	0.025187	1.65975	16	18	0.00161063
cardiac muscle cell proliferation	840	1.29553e-24	2.02736e-23	2.10183	237	0.00563695	923	0.0297933	1.73385	13	14	0.00130864
wound healing, spreading of epidermal cells	848	2.0895e-24	3.23897e-23	2.68473	143	0.0034012	1032	0.0460874	1.86722	9	9	0.000905979
positive regulation of adherens junction organization	850	2.23437e-24	3.45538e-23	2.03435	254	0.00604129	802	0.0150787	1.57996	22	26	0.00221462
positive regulation of focal adhesion assembly	904	2.88238e-23	4.19125e-22	2.02616	244	0.00580344	946	0.0323847	1.55602	20	24	0.00201329
regulation of extracellular matrix assembly	973	5.50926e-22	7.44288e-21	2.08037	215	0.00511369	674	0.0057938	1.86722	13	13	0.00130864
pulmonary valve morphogenesis	1041	1.25783e-20	1.5883e-19	2.10955	194	0.00461421	737	0.00989911	1.86722	12	12	0.00120797
branching involved in prostate gland morphogenesis	1267	3.12837e-17	3.24565e-16	2.00673	180	0.00428123	913	0.0278877	1.86722	10	10	0.00100664

## Sheet: RH4_ActiveEnhancerWithMYCN
GREAT assay of MYCN-bound active enhancers
# GREAT version 4.0.4	Species assembly: hg19	Association rule: Basal+extension: 5000 bp upstream, 1000 bp downstream, 1000000 bp max extension, curated regulatory domains included
# Term Name	Binom Rank	Binom Raw P-Value	Binom FDR Q-Val	Binom Fold Enrichment	Binom Observed Region Hits	Binom Region Set Coverage	Hyper Rank	Hyper FDR Q-Val	Hyper Fold Enrichment	Hyper Observed Gene Hits	Hyper Total Genes	Hyper Gene Set Coverage
cartilage development	54	7.75817e-45	1.88854e-42	2.24833	373	0.0533543	177	1.37098e-06	1.8417	69	152	0.0150919
chondrocyte differentiation	72	7.00034e-41	1.27805e-38	2.66665	246	0.0351881	282	9.33571e-05	2.12514	33	63	0.00721785
embryonic skeletal system development	89	7.64224e-37	1.12873e-34	2.19631	321	0.0459162	407	0.000941886	1.68221	51	123	0.0111549
regulation of catenin import into nucleus	102	6.2053e-35	7.99693e-33	3.91966	121	0.017308	579	0.0100663	2.36663	14	24	0.00306212
glomerulus development	180	1.27053e-28	9.27842e-27	2.63752	173	0.0247461	572	0.00954187	1.90922	24	51	0.00524934
animal organ regeneration	182	2.04972e-28	1.48042e-26	2.71856	163	0.0233157	810	0.0444255	1.58325	32	82	0.00699913
regulation of stem cell population maintenance	189	8.08627e-28	5.62403e-26	4.15376	89	0.0127306	673	0.0209002	2.29314	13	23	0.00284339
nerve development	221	1.40507e-25	8.35729e-24	2.30066	199	0.0284652	719	0.0260757	1.6673	30	73	0.00656168
regeneration	222	1.48849e-25	8.81357e-24	2.03085	263	0.0376198	500	0.00381046	1.5481	58	152	0.0126859
regulation of fibroblast growth factor receptor signaling pathway	234	9.93932e-25	5.58343e-23	2.73792	139	0.0198827	708	0.0242921	2.18459	14	26	0.00306212
mesoderm formation	247	4.62613e-24	2.46196e-22	2.37421	175	0.0250322	430	0.00148625	1.90922	32	68	0.00699913
formation of primary germ layer	273	1.34359e-22	6.46942e-21	2.00633	238	0.0340438	257	4.39315e-05	1.83783	53	117	0.0115923
mesoderm morphogenesis	274	1.41993e-22	6.81203e-21	2.2832	177	0.0253183	419	0.0011171	1.91263	33	70	0.00721785
chondrocyte development	278	2.08489e-22	9.85822e-21	2.76552	123	0.017594	604	0.0130631	2.39737	13	22	0.00284339
positive regulation of cell-substrate adhesion	280	2.47284e-22	1.16091e-20	2.09354	212	0.0303247	426	0.00130159	1.72235	45	106	0.00984252
epithelial to mesenchymal transition	336	1.63542e-19	6.39808e-18	2.14151	174	0.0248891	231	1.04845e-05	2.21296	36	66	0.00787402
SMAD protein signal transduction	377	5.75172e-18	2.00547e-16	2.39008	126	0.0180232	421	0.00113099	2.02854	28	56	0.00612423
embryonic placenta development	383	1.12013e-17	3.84441e-16	2.09196	165	0.0236018	546	0.00778714	1.68665	37	89	0.00809274
regulation of muscle hypertrophy	399	3.83936e-17	1.26487e-15	2.35733	123	0.017594	483	0.00313851	2.07362	23	45	0.00503062
trabecula morphogenesis	409	6.51386e-17	2.09351e-15	2.48958	109	0.0155915	400	0.00080117	2.15802	25	47	0.00546807
skeletal muscle cell differentiation	419	1.14014e-16	3.57687e-15	2.60127	99	0.0141611	477	0.00282994	1.99027	26	53	0.00568679
regulation of cellular carbohydrate metabolic process	424	1.34867e-16	4.18121e-15	2.01339	169	0.0241739	649	0.0182607	1.52972	46	122	0.0100612
heparan sulfate proteoglycan metabolic process	431	1.73026e-16	5.27709e-15	2.44132	110	0.0157345	775	0.0357089	2.10367	14	27	0.00306212
heart trabecula morphogenesis	442	3.85699e-16	1.14706e-14	2.6915	90	0.0128737	695	0.0231056	2.02854	17	34	0.00371828
regulation of cardiac muscle hypertrophy	443	3.87827e-16	1.15079e-14	2.32824	118	0.0168788	590	0.0112519	1.98137	21	43	0.00459318
regulation of polysaccharide biosynthetic process	468	2.72447e-15	7.65239e-14	2.82884	78	0.0111572	803	0.0415889	1.96707	16	33	0.00349956
regulation of muscle adaptation	469	2.76289e-15	7.74375e-14	2.07089	144	0.0205979	550	0.00823927	1.78989	30	68	0.00656168
trabecula formation	505	2.06662e-14	5.37934e-13	3.14629	62	0.00886855	468	0.00260464	2.53568	15	24	0.00328084
positive regulation of transcription from RNA polymerase II promoter involved in cellular response to chemical stimulus	608	1.15131e-12	2.48914e-11	2.70329	68	0.00972679	535	0.00591152	2.31833	16	28	0.00349956
regulation of carbohydrate biosynthetic process	632	3.31199e-12	6.88862e-11	2.0117	120	0.0171649	540	0.00617412	1.73168	35	82	0.00765529
negative regulation of muscle hypertrophy	639	5.23845e-12	1.07761e-10	2.90001	57	0.00815334	635	0.0167723	2.43425	12	20	0.00262467
activin receptor signaling pathway	684	2.26178e-11	4.34665e-10	2.73216	59	0.00843942	604	0.0130631	2.39737	13	22	0.00284339
endoplasmic reticulum calcium ion homeostasis	713	5.09066e-11	9.38523e-10	2.99864	49	0.00700901	793	0.041591	2.21296	12	22	0.00262467
pulmonary valve morphogenesis	718	5.61438e-11	1.02787e-09	3.07363	47	0.00672293	796	0.0415298	2.70472	8	12	0.00174978
cardiac epithelial to mesenchymal transition	767	3.08213e-10	5.28222e-09	2.22861	77	0.0110142	213	5.65579e-06	3.00525	20	27	0.00437445
optic nerve development	803	7.35189e-10	1.20349e-08	3.09552	41	0.00586468	796	0.0415298	2.70472	8	12	0.00174978
positive regulation of cell-matrix adhesion	814	9.0031e-10	1.45388e-08	2.08304	85	0.0121585	434	0.00162063	2.11674	24	46	0.00524934
regulation of production of small RNA involved in gene silencing by RNA	817	9.4618e-10	1.52234e-08	2.77473	48	0.00686597	724	0.0264236	2.53568	10	16	0.00218723
epithelial to mesenchymal transition involved in endocardial cushion formation	854	2.33791e-09	3.59858e-08	3.31125	35	0.00500644	551	0.00828617	3.04282	9	12	0.0019685
positive regulation of stress fiber assembly	858	2.65406e-09	4.06615e-08	2.14294	75	0.0107281	542	0.00646299	1.98538	23	47	0.00503062
positive regulation of actin filament bundle assembly	888	5.38202e-09	7.96696e-08	2.05022	80	0.0114433	450	0.00218554	1.99166	27	55	0.00590551
ventricular cardiac muscle cell development	896	6.49251e-09	9.525e-08	2.95426	39	0.0055786	551	0.00828617	3.04282	9	12	0.0019685
membrane raft organization	914	1.03305e-08	1.48571e-07	3.00282	37	0.00529252	793	0.041591	2.21296	12	22	0.00262467
pharyngeal system development	986	3.17624e-08	4.23444e-07	2.071	70	0.0100129	416	0.00111272	2.59653	16	25	0.00349956
cell differentiation involved in metanephros development	1046	9.1074e-08	1.14452e-06	2.19527	57	0.00815334	522	0.00499698	2.70472	12	18	0.00262467
substrate adhesion-dependent cell spreading	1047	9.26681e-08	1.16344e-06	2.10024	63	0.00901159	760	0.0336497	1.92178	18	38	0.00393701
regulation of interleukin-2 secretion	1132	3.13772e-07	3.64358e-06	3.85711	21	0.00300386	436	0.00166062	4.05709	7	7	0.00153106
cell surface receptor signaling pathway involved in heart development	1155	4.5125e-07	5.13566e-06	2.04215	60	0.00858246	727	0.0265411	2.31833	12	21	0.00262467
endocardial cushion formation	1169	5.05299e-07	5.68191e-06	2.45214	40	0.00572164	812	0.044617	2.38652	10	17	0.00218723
lamellipodium assembly	1176	5.33938e-07	5.96821e-06	2.04514	59	0.00843942	622	0.0144894	2.16378	16	30	0.00349956

## Sheet: RH4_MYCN_bound_promoters
GREAT assay of MYCN bound promoters
# GREAT version 4.0.4	Species assembly: hg19	Association rule: Basal+extension: 5000 bp upstream, 1000 bp downstream, 1000000 bp max extension, curated regulatory domains included
# Term Name	Binom Rank	Binom Raw P-Value	Binom FDR Q-Val	Binom Fold Enrichment	Binom Observed Region Hits	Binom Region Set Coverage	Hyper Rank	Hyper FDR Q-Val	Hyper Fold Enrichment	Hyper Observed Gene Hits	Hyper Total Genes	Hyper Gene Set Coverage
RNA processing	1	8.32032e-64	1.09371e-59	2.58523	384	0.15809	11	3.47969e-64	2.54395	336	880	0.12069
ncRNA metabolic process	2	2.79453e-58	1.83671e-54	3.27023	250	0.102923	21	8.77075e-47	2.69882	224	553	0.0804598
ribonucleoprotein complex biogenesis	3	4.23397e-51	1.85518e-47	3.20038	226	0.0930424	16	9.77644e-49	2.95464	200	451	0.0718391
mRNA metabolic process	4	1.99759e-49	6.56458e-46	2.61128	296	0.121861	15	2.74481e-51	2.63218	256	648	0.091954
rRNA processing	5	7.36781e-49	1.937e-45	4.45768	146	0.060107	26	1.00249e-40	3.46355	131	252	0.0470546
ncRNA processing	6	2.46711e-48	5.40502e-45	3.53396	188	0.0773981	28	8.08363e-40	2.88436	171	395	0.0614224
ribosome biogenesis	7	3.96493e-48	7.44556e-45	3.79004	172	0.070811	24	3.67436e-43	3.2172	155	321	0.0556753
rRNA metabolic process	8	5.85795e-48	9.62534e-45	4.34963	147	0.0605187	27	8.08177e-40	3.39567	132	259	0.0474138
translation	9	5.17445e-46	7.55757e-43	3.39889	188	0.0773981	18	2.33028e-47	3.1438	176	373	0.0632184
peptide biosynthetic process	15	1.00099e-40	8.77197e-38	3.07993	190	0.0782215	22	7.96157e-45	3.01772	178	393	0.0639368
translational initiation	18	7.18854e-37	5.24963e-34	5.03001	97	0.0399341	37	2.41796e-34	4.07166	88	144	0.0316092
viral gene expression	19	7.75649e-37	5.36627e-34	5.58337	88	0.0362289	41	3.77146e-33	4.21625	81	128	0.0290948
viral transcription	21	3.11614e-35	1.95056e-32	5.66102	83	0.0341704	39	2.39538e-33	4.44181	76	114	0.0272988
nuclear-transcribed mRNA catabolic process	22	4.08908e-34	2.44323e-31	4.08639	111	0.0456978	43	8.66667e-30	3.38209	100	197	0.0359195
SRP-dependent cotranslational protein targeting to membrane	23	4.23684e-34	2.42145e-31	6.54238	71	0.0292301	42	2.7494e-30	4.65674	65	93	0.0233477
mRNA catabolic process	24	1.98962e-33	1.08973e-30	3.86095	116	0.0477563	46	2.05447e-29	3.2685	104	212	0.0373563
amide biosynthetic process	26	9.32541e-33	4.71471e-30	2.57225	202	0.0831618	30	3.56323e-39	2.70538	188	463	0.0675287
protein targeting to ER	27	1.10127e-32	5.36154e-30	5.99738	73	0.0300535	48	9.65358e-29	4.37649	67	102	0.0240661
cotranslational protein targeting to membrane	28	1.98392e-32	9.31377e-30	6.13776	71	0.0292301	51	7.37374e-28	4.37451	65	99	0.0233477
multi-organism metabolic process	29	3.59322e-32	1.62872e-29	4.5514	93	0.0382874	45	1.79039e-29	3.78154	84	148	0.0301724
RNA catabolic process	30	1.01608e-31	4.45212e-29	3.49797	124	0.0510498	50	6.70105e-28	3.05375	110	240	0.0395115
nuclear-transcribed mRNA catabolic process, nonsense-mediated decay	31	1.82419e-31	7.73517e-29	5.47503	76	0.0312886	56	8.81508e-26	3.91924	70	119	0.0251437
peptide metabolic process	32	8.59316e-31	3.52991e-28	2.45527	206	0.0848086	38	5.63291e-34	2.47766	193	519	0.0693247
establishment of protein localization to endoplasmic reticulum	33	9.26106e-31	3.68899e-28	5.41211	75	0.0308769	47	2.97398e-29	4.33705	69	106	0.0247845
protein localization to endoplasmic reticulum	34	3.24147e-30	1.25321e-27	4.89182	81	0.0333471	52	1.55134e-27	3.94433	74	125	0.0265805
RNA splicing, via transesterification reactions	35	1.35314e-25	5.082e-23	2.8033	136	0.0559901	68	3.62687e-21	2.60409	111	284	0.0398707
mRNA splicing, via spliceosome	37	3.07888e-25	1.09384e-22	2.79052	135	0.0555784	69	4.87876e-21	2.60818	110	281	0.0395115
posttranscriptional regulation of gene expression	38	7.93636e-25	2.74536e-22	2.15087	215	0.0885138	61	1.67602e-23	2.16478	180	554	0.0646552
protein targeting to membrane	39	2.49829e-24	8.42051e-22	4.08096	78	0.032112	64	5.39201e-23	3.55345	72	135	0.0258621
cellular amide metabolic process	40	2.76529e-23	9.08745e-21	2.01985	232	0.0955126	54	6.74242e-27	2.11906	215	676	0.077227
mRNA processing	42	1.61751e-21	5.06243e-19	2.13292	189	0.0778098	59	2.04998e-24	2.32252	160	459	0.0574713
RNA splicing	44	5.35746e-21	1.60054e-18	2.25296	164	0.0675175	67	1.16216e-21	2.35055	139	394	0.0499282
nucleobase-containing compound catabolic process	46	1.68893e-19	4.82631e-17	2.33622	141	0.0580486	71	1.42769e-19	2.35155	126	357	0.0452586
establishment of protein localization to membrane	47	7.05913e-19	1.9743e-16	2.81232	98	0.0403458	80	4.79953e-18	2.71444	88	216	0.0316092
regulation of translation	51	2.71216e-17	6.99047e-15	2.0416	166	0.0683409	81	6.54702e-18	2.16852	138	424	0.049569
cytoplasmic translation	52	5.34676e-17	1.3516e-14	6.99239	32	0.0131742	102	1.06999e-13	4.64841	30	43	0.0107759
chromatin silencing	54	8.62205e-17	2.09883e-14	4.90835	43	0.0177028	241	0.000100919	2.29031	33	96	0.0118534
heterocycle catabolic process	55	1.24605e-16	2.97805e-14	2.12626	145	0.0596954	83	5.18985e-17	2.17118	131	402	0.0470546
cellular nitrogen compound catabolic process	56	1.58355e-16	3.7171e-14	2.11988	145	0.0596954	84	8.22931e-17	2.16044	131	404	0.0470546
negative regulation of gene expression, epigenetic	57	1.6615e-16	3.83165e-14	3.96643	53	0.0218197	190	4.33867e-06	2.35848	40	113	0.0143678
DNA-templated transcription, termination	59	2.12585e-16	4.73632e-14	3.88005	54	0.0222314	161	1.30133e-07	2.56729	42	109	0.0150862
ribonucleoprotein complex subunit organization	61	9.20284e-16	1.98314e-13	2.5665	94	0.038699	96	1.18006e-14	2.54566	81	212	0.0290948
regulation of gene expression, epigenetic	63	1.40566e-15	2.93291e-13	2.51851	96	0.0395224	145	4.49245e-09	2.08712	78	249	0.0280172
mitochondrial translational termination	64	1.44628e-15	2.97052e-13	4.52044	43	0.0177028	133	1.40476e-09	2.99448	40	89	0.0143678
establishment of protein localization to organelle	65	1.65443e-15	3.34577e-13	2.03984	148	0.0609304	66	9.10441e-22	2.41615	132	364	0.0474138
aromatic compound catabolic process	66	1.67275e-15	3.33156e-13	2.04538	147	0.0605187	90	3.48903e-16	2.11923	132	415	0.0474138
mitochondrial translation	68	3.95299e-15	7.64148e-13	3.90656	49	0.0201729	129	6.73766e-10	2.81179	46	109	0.016523
ribonucleoprotein complex assembly	69	4.03614e-15	7.68914e-13	2.5633	90	0.0370523	99	4.00201e-14	2.56514	77	200	0.027658
viral life cycle	71	4.23258e-15	7.83623e-13	2.26459	114	0.0469329	91	1.43017e-15	2.31747	104	299	0.0373563
translational elongation	77	2.8095e-14	4.79622e-12	3.64333	50	0.0205846	141	3.98047e-09	2.68846	46	114	0.016523
translational termination	84	2.16967e-13	3.39528e-11	3.81251	44	0.0181145	147	7.6773e-09	2.8162	41	97	0.014727
ribosomal small subunit biogenesis	86	2.85918e-13	4.37022e-11	4.10082	40	0.0164677	126	3.64706e-10	3.37964	35	69	0.0125718
positive regulation of gene expression, epigenetic	88	3.52002e-13	5.25804e-11	4.16545	39	0.016056	288	0.000574201	2.27507	28	82	0.0100575
mitochondrial translational elongation	89	4.40617e-13	6.50777e-11	4.1344	39	0.016056	163	1.93889e-07	2.75699	36	87	0.012931
telomere organization	94	2.99102e-12	4.18265e-10	3.1997	50	0.0205846	257	0.000224487	2.10701	37	117	0.0132902
regulation of hematopoietic stem cell differentiation	95	4.19659e-12	5.80675e-10	3.54194	43	0.0177028	255	0.000189282	2.19934	34	103	0.0122126
macromolecular complex disassembly	96	4.20211e-12	5.75383e-10	2.50772	73	0.0300535	154	3.69116e-08	2.1862	63	192	0.0226293
regulation of DNA-templated transcription in response to stress	97	5.90442e-12	8.00141e-10	2.87666	57	0.0234664	246	0.000134709	2.12759	38	119	0.0136494
regulation of transcription from RNA polymerase II promoter in response to stress	98	1.76157e-11	2.36284e-09	2.962	52	0.021408	258	0.000247934	2.12263	36	113	0.012931
regulation of hematopoietic progenitor cell differentiation	99	1.89435e-11	2.51528e-09	3.26396	45	0.0185261	258	0.000247934	2.12263	36	113	0.012931
protein-DNA complex subunit organization	102	2.72908e-11	3.51704e-09	2.14094	93	0.0382874	168	4.132e-07	1.95333	73	249	0.0262213
nucleic acid phosphodiester bond hydrolysis	103	3.4258e-11	4.37205e-09	2.14168	92	0.0378757	152	1.88939e-08	1.9821	83	279	0.0298132
regulation of signal transduction by p53 class mediator	104	3.71736e-11	4.69853e-09	2.37092	74	0.0304652	196	6.5019e-06	2.04424	54	176	0.0193965
tRNA metabolic process	105	4.44567e-11	5.56555e-09	2.50716	66	0.0271717	160	8.68944e-08	2.1734	61	187	0.0219109
telomere maintenance	106	5.33645e-11	6.6177e-09	3.06567	47	0.0193495	237	8.89885e-05	2.24226	35	104	0.0125718
DNA-templated transcription, elongation	108	5.56859e-11	6.77769e-09	3.20455	44	0.0181145	256	0.000198682	2.14159	36	112	0.012931
ribosome assembly	111	9.93098e-11	1.17606e-08	4.02891	32	0.0131742	158	7.34741e-08	3.17272	30	63	0.0107759
ribonucleoprotein complex export from nucleus	112	1.02285e-10	1.20048e-08	2.92353	49	0.0201729	201	8.10773e-06	2.25673	42	124	0.0150862
ribonucleoprotein complex localization	113	1.05031e-10	1.2218e-08	2.88367	50	0.0205846	193	4.69615e-06	2.27378	43	126	0.0154454
negative regulation of ubiquitin protein ligase activity	114	1.27171e-10	1.46637e-08	3.61823	36	0.0148209	208	1.58237e-05	2.59586	30	77	0.0107759
snRNA metabolic process	116	2.1702e-10	2.45925e-08	3.54576	36	0.0148209	197	6.54651e-06	2.55662	33	86	0.0118534
ribosomal large subunit biogenesis	121	6.54706e-10	7.11249e-08	3.55059	34	0.0139975	146	4.9826e-09	3.1906	34	71	0.0122126
termination of RNA polymerase II transcription	122	8.56851e-10	9.23222e-08	3.88557	30	0.0123508	352	0.00415632	2.22091	23	69	0.00826149
regulation of ubiquitin protein ligase activity	123	9.96432e-10	1.06489e-07	3.15767	39	0.016056	223	3.62413e-05	2.38989	33	92	0.0118534
gene silencing	124	1.22384e-09	1.29736e-07	2.4195	60	0.0247015	263	0.000297874	1.86109	50	179	0.0179598
chromatin assembly or disassembly	125	1.60599e-09	1.68886e-07	2.3245	64	0.0263483	253	0.000183496	1.89282	50	176	0.0179598
RNA 3'-end processing	126	1.71055e-09	1.78454e-07	3.04269	40	0.0164677	277	0.000446064	2.11713	34	107	0.0122126
mRNA export from nucleus	128	2.0637e-09	2.11932e-07	2.92675	42	0.0172911	247	0.000140428	2.19995	35	106	0.0125718
cellular protein complex disassembly	129	2.28383e-09	2.32721e-07	2.65434	49	0.0201729	166	3.01839e-07	2.39441	46	128	0.016523
anaphase-promoting complex-dependent catabolic process	130	2.37854e-09	2.40507e-07	3.17028	37	0.0152326	269	0.000359844	2.33195	28	80	0.0100575
regulation of transcription from RNA polymerase II promoter in response to hypoxia	131	2.48473e-09	2.49326e-07	3.10704	38	0.0156443	291	0.000607514	2.30633	27	78	0.00969828
ATP-dependent chromatin remodeling	132	3.14425e-09	3.13115e-07	3.07933	38	0.0156443	291	0.000607514	2.30633	27	78	0.00969828
negative regulation of ubiquitin-protein transferase activity	133	3.44551e-09	3.40536e-07	3.18527	36	0.0148209	243	0.000117966	2.37954	30	84	0.0107759
negative regulation of ubiquitin-protein ligase activity involved in mitotic cell cycle	134	5.02036e-09	4.92482e-07	3.41643	32	0.0131742	264	0.000299686	2.43987	26	71	0.00933908
regulation of ubiquitin-protein ligase activity involved in mitotic cell cycle	135	5.76333e-09	5.61178e-07	3.39606	32	0.0131742	275	0.000386475	2.40598	26	72	0.00933908
nucleosome organization	136	6.63421e-09	6.41226e-07	2.30745	60	0.0247015	298	0.000662264	1.84204	47	170	0.0168822
negative regulation of cell cycle G2/M phase transition	137	8.36227e-09	8.0235e-07	2.91617	39	0.016056	293	0.000619469	2.1965	30	91	0.0107759
regulation of posttranscriptional gene silencing	138	8.37358e-09	7.97614e-07	2.6713	45	0.0185261	260	0.000271979	2.1394	35	109	0.0125718
regulation of gene silencing by RNA	138	8.37358e-09	7.97614e-07	2.6713	45	0.0185261	260	0.000271979	2.1394	35	109	0.0125718
DNA replication-independent nucleosome organization	141	9.35343e-09	8.71991e-07	3.79571	27	0.0111157	367	0.00693604	2.34429	19	54	0.00682471
regulation of gene silencing by miRNA	142	1.15534e-08	1.06951e-06	2.67632	44	0.0181145	270	0.000364204	2.1371	34	106	0.0122126
protein-DNA complex assembly	143	1.26505e-08	1.16287e-06	2.01836	78	0.032112	174	1.31879e-06	1.98659	65	218	0.0233477
histone H4 acetylation	144	1.27417e-08	1.16312e-06	3.44092	30	0.0123508	210	1.76342e-05	3.00475	23	51	0.00826149
maturation of SSU-rRNA	146	1.69209e-08	1.52346e-06	3.58065	28	0.0115274	189	3.93782e-06	3.1354	24	51	0.00862069
regulation of cell cycle G2/M phase transition	147	1.79038e-08	1.60099e-06	2.03322	75	0.0308769	205	1.11097e-05	1.94604	59	202	0.0211925
spliceosomal snRNP assembly	150	1.9855e-08	1.73996e-06	4.55989	21	0.00864553	284	0.000531842	2.98069	17	38	0.00610632
transcription-coupled nucleotide-excision repair	151	2.02235e-08	1.76051e-06	3.21414	32	0.0131742	305	0.000807629	2.30974	26	75	0.00933908
transcription initiation from RNA polymerase I promoter	152	2.17205e-08	1.8784e-06	4.75671	20	0.00823384	262	0.000288504	3.23041	16	33	0.00574713
positive regulation of ubiquitin protein ligase activity	153	2.73131e-08	2.34661e-06	2.98426	35	0.0144092	267	0.000341409	2.30022	29	84	0.0104167
ncRNA transcription	154	3.10854e-08	2.65336e-06	2.91437	36	0.0148209	302	0.000765	2.17263	30	92	0.0107759
