# Supplementary material for: MYCN drives oncogenesis by cooperating with the histone methyltransferase G9a and the WDR5 adaptor to orchestrate global gene transcription
Source: PLoS Biol. 2024 Mar 28;22(3):e3002240. doi: 10.1371/journal.pbio.3002240 (PMC11003700; doi:10.1371/journal.pbio.3002240)
Supplement: S4 Table — (XLSX) [file pbio.3002240.s011.xlsx]

## Sheet: MYCN-IMR32_RawData
Table S4. MYCN protein partners identified in NB cells.
protein	accession	Gene	reference	MYCN-antibody1.count	MYCN-antibody2.count	IgG.count
N-myc proto-oncogene protein	P04198	MYCN	[MYCN_HUMAN]	197	180
X-ray repair cross-complementing protein 5	P13010	XRCC5	[XRCC5_HUMAN]	195	143
Poly [ADP-ribose] polymerase 1	P09874	PARP1	[PARP1_HUMAN]	175	160
E3 ubiquitin-protein ligase HERC2	O95714	HERC2	[HERC2_HUMAN]	174	284
X-ray repair cross-complementing protein 6	P12956	XRCC6	[XRCC6_HUMAN]	165	173
DNA ligase 3	P49916	LIG3	[DNLI3_HUMAN]	129	102
Lamina-associated polypeptide 2, isoforms beta/gamma	P42167	TMPO	[LAP2B_HUMAN]	118	127
DNA topoisomerase 2-beta	Q02880	TOP2B	[TOP2B_HUMAN]	107	106
Replication protein A 70 kDa DNA-binding subunit	P27694	RPA1	[RFA1_HUMAN]	105	191
DNA topoisomerase 2-alpha	P11388	TOP2A	[TOP2A_HUMAN]	104	101
Zinc finger homeobox protein 4	E7EVZ1	ZFHX4	[E7EVZ1_HUMAN]	101	101
DNA-dependent protein kinase catalytic subunit	P78527	PRKDC	[PRKDC_HUMAN]	98	126
FACT complex subunit SPT16	Q9Y5B9	SUPT16H	[SP16H_HUMAN]	93	86
Emerin	P50402	EMD	[EMD_HUMAN]	89	96
SWI/SNF-related matrix-associated actin-dependent regulator of chromatin subfamily A member 5	O60264	SMARCA5	[SMCA5_HUMAN]	89	73
LEM domain-containing protein 2	Q8NC56	LEMD2	[LEMD2_HUMAN]	83	96
Heat shock cognate 71 kDa protein	P11142	HSPA8	[HSP7C_HUMAN]	79	72
Lamina-associated polypeptide 2, isoform alpha	P42166	TMPO	[LAP2A_HUMAN]	76	88
Tubulin beta chain	Q5JP53	TUBB	[Q5JP53_HUMAN]	75		19
Tubulin beta-2B chain	Q9BVA1	TUBB2B	[TBB2B_HUMAN]	65
Calcineurin-binding protein cabin-1	Q9Y6J0	CABIN1	[CABIN_HUMAN]	62	47
Tubulin beta-4B chain	P68371	TUBB4B	[TBB4B_HUMAN]	60	36	16
Serine beta-lactamase-like protein LACTB, mitochondrial	P83111	LACTB	[LACTB_HUMAN]	60	24
Tubulin alpha-1C chain	Q9BQE3	TUBA1C	[TBA1C_HUMAN]	56	45	11
F-box/WD repeat-containing protein 7	Q969H0	FBXW7	[FBXW7_HUMAN]	54	55
DNA topoisomerase 3-alpha	Q13472	TOP3A	[TOP3A_HUMAN]	53	58
Bloom syndrome protein	P54132	BLM	[BLM_HUMAN]	52	82
Tubulin alpha-1A chain	Q71U36	TUBA1A	[TBA1A_HUMAN]	52	40
Tubulin beta-3 chain	Q13509	TUBB3	[TBB3_HUMAN]	46	26
Chromodomain-helicase-DNA-binding protein 1-like	Q86WJ1	CHD1L	[CHD1L_HUMAN]	44	37
FACT complex subunit SSRP1	Q08945	SSRP1	[SSRP1_HUMAN]	44	45
Homeobox protein cut-like 1	P39880	CUX1	[CUX1_HUMAN]	44	41
Replication factor C subunit 1	P35251	RFC1	[RFC1_HUMAN]	42	43
Chromodomain-helicase-DNA-binding protein 7	Q9P2D1	CHD7	[CHD7_HUMAN]	41	33
Centrosomal protein of 170 kDa	Q5SW79	CEP170	[CE170_HUMAN]	39	36
Homeobox-containing protein 1	E5RGZ2	HMBOX1	[E5RGZ2_HUMAN]	39	34
Centrosomal protein of 170 kDa (Fragment)	H0Y2V6	CEP170	[H0Y2V6_HUMAN]	38	34
Zinc finger homeobox protein 3	Q15911	ZFHX3	[ZFHX3_HUMAN]	37	37
78 kDa glucose-regulated protein	P11021	HSPA5	[GRP78_HUMAN]	37	38
Transcription factor 12	Q99081	TCF12	[HTF4_HUMAN]	37	44
Ubinuclein-1	Q9NPG3	UBN1	[UBN1_HUMAN]	35	27
DNA repair protein XRCC1	P18887	XRCC1	[XRCC1_HUMAN]	35	26
Werner syndrome ATP-dependent helicase	Q14191	WRN	[WRN_HUMAN]	34	34
DNA repair protein XRCC1	F5H8D7	XRCC1	[F5H8D7_HUMAN]	34	26
Paired mesoderm homeobox protein 2B	Q99453	PHOX2B	[PHX2B_HUMAN]	33	37
Protein HIRA	P54198	HIRA	[HIRA_HUMAN]	33	29
Nucleosome-remodeling factor subunit BPTF (Fragment)	E7ETD6	BPTF	[E7ETD6_HUMAN]	32	34
Nucleolar transcription factor 1	E9PKP7	UBTF	[E9PKP7_HUMAN]	31	32
Histone H4	P62805	HIST1H4A	[H4_HUMAN]	30	42
Single-stranded DNA-binding protein, mitochondrial	Q04837	SSBP1	[SSBP_HUMAN]	29	63
Albumin, isoform CRA_k	C9JKR2	ALB	[C9JKR2_HUMAN]	28
Sterol regulatory element-binding protein 2	Q12772	SREBF2	[SRBP2_HUMAN]	28	22
Poly [ADP-ribose] polymerase	G3V167	PARP2	[G3V167_HUMAN]	28	18
Neuroblast differentiation-associated protein AHNAK	Q09666	AHNAK	[AHNK_HUMAN]	28
Actin, cytoplasmic 1	P60709	ACTB	[ACTB_HUMAN]	26	18
Protein transport protein Sec16A	F1T0I1	SEC16A	[F1T0I1_HUMAN]	26
Bromodomain adjacent to zinc finger domain protein 1A	Q9NRL2	BAZ1A	[BAZ1A_HUMAN]	25	18
E3 ubiquitin-protein ligase MYCBP2	O75592	MYCBP2	[MYCB2_HUMAN]	25	41
Peripherin	P41219	PRPH	[PERI_HUMAN]	24	19
Heat shock protein HSP 90-beta	P08238	HSP90AB1	[HS90B_HUMAN]	24	12	3
Bromodomain adjacent to zinc finger domain protein 2A	J3KPG5	BAZ2A	[J3KPG5_HUMAN]	24	26
Tyrosine-protein kinase BAZ1B	Q9UIG0	BAZ1B	[BAZ1B_HUMAN]	24	28
Glypican-2	Q8N158	GPC2	[GPC2_HUMAN]	23	25
Remodeling and spacing factor 1	Q96T23	RSF1	[RSF1_HUMAN]	23	27
DNA topoisomerase 1	P11387	TOP1	[TOP1_HUMAN]	22	22
Replication protein A 32 kDa subunit	P15927	RPA2	[RFA2_HUMAN]	22	108
Paired mesoderm homeobox protein 2A	O14813	PHOX2A	[PHX2A_HUMAN]	22
Spectrin alpha chain, non-erythrocytic 1	A0A0D9SF54	SPTAN1	[A0A0D9SF54_HUMAN]	22	11
Trifunctional enzyme subunit alpha, mitochondrial	P40939	HADHA	[ECHA_HUMAN]	21	28
Heat shock 70 kDa protein 1A	P0DMV8	HSPA1A	[HS71A_HUMAN]	21	21
Chromodomain-helicase-DNA-binding protein 4	F5GWX5	CHD4	[F5GWX5_HUMAN]	21	25
Heat shock 70 kDa protein 1-like	P34931	HSPA1L	[HS71L_HUMAN]	20
Histone H2A type 1-H	Q96KK5	HIST1H2AH	[H2A1H_HUMAN]	20	16
ADP/ATP translocase 3	P12236	SLC25A6	[ADT3_HUMAN]	20	20
ATP synthase subunit alpha, mitochondrial	P25705	ATP5A1	[ATPA_HUMAN]	20	8
RecQ-mediated genome instability protein 1	Q9H9A7	RMI1	[RMI1_HUMAN]	20	24
Ubinuclein-2	Q6ZU65	UBN2	[UBN2_HUMAN]	20	12
Histone H2B type 1-J	P06899	HIST1H2BJ	[H2B1J_HUMAN]	19	10
Transcription factor 12	F5GY10	TCF12	[F5GY10_HUMAN]	19	24
Helicase-like transcription factor	A0A0C4DGA6	HLTF	[A0A0C4DGA6_HUMAN]	19	25
Serine/threonine-protein phosphatase PGAM5, mitochondrial	Q96HS1	PGAM5	[PGAM5_HUMAN]	19	22
40S ribosomal protein S3	P23396	RPS3	[RS3_HUMAN]	18	13
Actin, alpha cardiac muscle 1	P68032	ACTC1	[ACTC_HUMAN]	18	10
Histone H2B type 1-K	O60814	HIST1H2BK	[H2B1K_HUMAN]	18	11
DNA replication licensing factor MCM7	P33993	MCM7	[MCM7_HUMAN]	18	11
Protein max	P61244	MAX	[MAX_HUMAN]	18
Trifunctional enzyme subunit beta, mitochondrial	P55084	HADHB	[ECHB_HUMAN]	17	8
Complement C3	P01024	C3	[CO3_HUMAN]	17	15	2
Centromere protein F	P49454	CENPF	[CENPF_HUMAN]	17	22
Histone-binding protein RBBP4	Q09028	RBBP4	[RBBP4_HUMAN]	16	13
Protein timeless homolog	Q9UNS1	TIMELESS	[TIM_HUMAN]	16	22
Inactive serine/threonine-protein kinase VRK3	Q8IV63	VRK3	[VRK3_HUMAN]	16	18
Zinc finger protein 451	E9PH99	ZNF451	[E9PH99_HUMAN]	16	12
ADP/ATP translocase 2	P05141	SLC25A5	[ADT2_HUMAN]	16	19
Fanconi anemia group M protein	Q8IYD8	FANCM	[FANCM_HUMAN]	16	31
Vimentin	P08670	VIM	[VIME_HUMAN]	16
SUN domain-containing protein 2	Q9UH99	SUN2	[SUN2_HUMAN]	16	11
ATPase family AAA domain-containing protein 3A	Q9NVI7	ATAD3A	[ATD3A_HUMAN]	15	10
26S proteasome non-ATPase regulatory subunit 3	O43242	PSMD3	[PSMD3_HUMAN]	15	15
Tyrosyl-DNA phosphodiesterase 1	Q9NUW8	TDP1	[TYDP1_HUMAN]	15	18
Neuralized-like protein 4 (Fragment)	I3L100	NEURL4	[I3L100_HUMAN]	15	20
Heat shock protein HSP 90-alpha	P07900	HSP90AA1	[HS90A_HUMAN]	15	12
Polyubiquitin-C (Fragment)	F5H265	UBC	[F5H265_HUMAN]	15	13
Transcription factor 12	H0YNP8	TCF12	[H0YNP8_HUMAN]	14	19
Core histone macro-H2A.1	O75367	H2AFY	[H2AY_HUMAN]	14	17
Microtubule-associated protein 1B	P46821	MAP1B	[MAP1B_HUMAN]	14	15
Guanine nucleotide-binding protein G(o) subunit alpha	P09471	GNAO1	[GNAO_HUMAN]	14	8
Zinc finger protein 281	Q9Y2X9	ZNF281	[ZN281_HUMAN]	14	13
Replication factor C subunit 5	P40937	RFC5	[RFC5_HUMAN]	14	14
ALX homeobox protein 1	Q15699	ALX1	[ALX1_HUMAN]	14	13
U5 small nuclear ribonucleoprotein 200 kDa helicase	O75643	SNRNP200	[U520_HUMAN]	14	17
Glypican-1	P35052	GPC1	[GPC1_HUMAN]	14	17
DNA damage-binding protein 1	Q16531	DDB1	[DDB1_HUMAN]	14	10
Transformation/transcription domain-associated protein	F2Z2U4	TRRAP	[F2Z2U4_HUMAN]	14
Cytoplasmic dynein 1 heavy chain 1	Q14204	DYNC1H1	[DYHC1_HUMAN]	14	14
B-cell lymphoma/leukemia 11B	Q9C0K0	BCL11B	[BC11B_HUMAN]	14
Replication factor C subunit 3	P40938	RFC3	[RFC3_HUMAN]	13	11
BCL-6 corepressor	Q6W2J9	BCOR	[BCOR_HUMAN]	13	4
Trypsin-1 (Fragment)	H0Y8D1	PRSS1	[H0Y8D1_HUMAN]	13	7	4
DNA-binding protein SATB1	Q01826	SATB1	[SATB1_HUMAN]	13	9
2,4-dienoyl-CoA reductase, mitochondrial	Q16698	DECR1	[DECR_HUMAN]	13	7
Reticulocalbin-2	Q14257	RCN2	[RCN2_HUMAN]	13	9
Thrombospondin-1	P07996	THBS1	[TSP1_HUMAN]	13
Lamin-B1	P20700	LMNB1	[LMNB1_HUMAN]	12	18
Flotillin-2	J3QLD9	FLOT2	[J3QLD9_HUMAN]	12
Replication factor C subunit 4	P35249	RFC4	[RFC4_HUMAN]	12	7
Syndecan	E7ESK6	SDC2	[E7ESK6_HUMAN]	12	9
Twinkle protein, mitochondrial	Q96RR1	PEO1	[PEO1_HUMAN]	12	15
Insulin-like growth factor 2 mRNA-binding protein 1	Q9NZI8	IGF2BP1	[IF2B1_HUMAN]	12	13
Leucine-rich PPR motif-containing protein, mitochondrial	P42704	LRPPRC	[LPPRC_HUMAN]	11	9
Aprataxin	Q7Z2E3	APTX	[APTX_HUMAN]	11	11
B-cell lymphoma/leukemia 11A	Q9H165	BCL11A	[BC11A_HUMAN]	11	11
Zinc finger homeobox protein 2	Q9C0A1	ZFHX2	[ZFHX2_HUMAN]	11	8
Probable ATP-dependent RNA helicase DDX41	Q9UJV9	DDX41	[DDX41_HUMAN]	11	11
Heterogeneous nuclear ribonucleoproteins C1/C2	G3V576	HNRNPC	[G3V576_HUMAN]	11
Tonsoku-like protein	Q96HA7	TONSL	[TONSL_HUMAN]	11	15
Stress-70 protein, mitochondrial	P38646	HSPA9	[GRP75_HUMAN]	11	8
DNA mismatch repair protein Msh6	P52701	MSH6	[MSH6_HUMAN]	11	7
Elongation factor 1-alpha 1	P68104	EEF1A1	[EF1A1_HUMAN]	10	14
Syndecan-1	P18827	SDC1	[SDC1_HUMAN]	10	9
Bcl-2-associated transcription factor 1 (Fragment)	E9PK09	BCLAF1	[E9PK09_HUMAN]	10
Prospero homeobox protein 1	Q92786	PROX1	[PROX1_HUMAN]	10	9
Oxysterol-binding protein-related protein 8	Q9BZF1	OSBPL8	[OSBL8_HUMAN]	10
Transcription factor 4	H3BPJ7	TCF4	[H3BPJ7_HUMAN]	10
ATPase family AAA domain-containing protein 3B	Q5T9A4	ATAD3B	[ATD3B_HUMAN]	10
Pikachurin	Q63HQ2	EGFLAM	[EGFLA_HUMAN]	10	9
Spectrin beta chain, non-erythrocytic 1	Q01082	SPTBN1	[SPTB2_HUMAN]	9	3
Agrin	A0A087X208	AGRN	[A0A087X208_HUMAN]	9	10
Replication factor C subunit 2	P35250	RFC2	[RFC2_HUMAN]	9	8
Protein Wiz	B9EGQ5	WIZ	[B9EGQ5_HUMAN]	9	6
ATP-dependent RNA helicase DDX1	A0A087X2G1	DDX1	[A0A087X2G1_HUMAN]	9	6
Pinin	Q9H307	PNN	[PININ_HUMAN]	9	14
Zinc finger protein 462	Q96JM2	ZNF462	[ZN462_HUMAN]	9	10
Prelamin-A/C	P02545	LMNA	[LMNA_HUMAN]	9	10
Lamin-B2	Q03252	LMNB2	[LMNB2_HUMAN]	9	9
Zinc finger protein 609	O15014	ZNF609	[ZN609_HUMAN]	9	1
Prohibitin-2	F5GY37	PHB2	[F5GY37_HUMAN]	9	6
Transcription factor A, mitochondrial	Q00059	TFAM	[TFAM_HUMAN]	9	16
Guanine nucleotide-binding protein G(k) subunit alpha	P08754	GNAI3	[GNAI3_HUMAN]	9	5
Nuclear mitotic apparatus protein 1	Q14980	NUMA1	[NUMA1_HUMAN]	9	11
Transcription activator BRG1	P51532	SMARCA4	[SMCA4_HUMAN]	9	2
Calcium-binding mitochondrial carrier protein Aralar2	Q9UJS0	SLC25A13	[CMC2_HUMAN]	9	3
Clathrin heavy chain 1	Q00610	CLTC	[CLH1_HUMAN]	8	2
Transcriptional repressor p66-beta	Q8WXI9	GATAD2B	[P66B_HUMAN]	8	7
TAF6-like RNA polymerase II p300/CBP-associated factor-associated factor 65 kDa subunit 6L	Q9Y6J9	TAF6L	[TAF6L_HUMAN]	8	3
Kelch-like ECH-associated protein 1	Q14145	KEAP1	[KEAP1_HUMAN]	8	10
Ewing's tumor-associated antigen 1	Q9NY74	ETAA1	[ETAA1_HUMAN]	8	13
Guanine nucleotide-binding protein G(i) subunit alpha-2	P04899	GNAI2	[GNAI2_HUMAN]	8	5
Bromodomain adjacent to zinc finger domain protein 2B	Q9UIF8	BAZ2B	[BAZ2B_HUMAN]	8	6
Transcription factor 20	Q9UGU0	TCF20	[TCF20_HUMAN]	8	8
Heterogeneous nuclear ribonucleoprotein U	Q00839	HNRNPU	[HNRPU_HUMAN]	8	11
60S ribosomal protein L4	P36578	RPL4	[RL4_HUMAN]	8	8
Very-long-chain (3R)-3-hydroxyacyl-CoA dehydratase 3	Q9P035	HACD3	[HACD3_HUMAN]	7	7
Polyadenylate-binding protein	A0A087WTT1	PABPC1	[A0A087WTT1_HUMAN]	7	12
Histone-lysine N-methyltransferase EHMT2	A0A0G2JIS2	EHMT2	[A0A0G2JIS2_HUMAN]	7
Core histone macro-H2A.2	Q9P0M6	H2AFY2	[H2AW_HUMAN]	7	9
DnaJ homolog subfamily A member 1	P31689	DNAJA1	[DNJA1_HUMAN]	7	2
Endoplasmin	P14625	HSP90B1	[ENPL_HUMAN]	7
Integrator complex subunit 6	Q9UL03	INTS6	[INT6_HUMAN]	7	4
Nucleolin	P19338	NCL	[NUCL_HUMAN]	7	5
40S ribosomal protein S15	K7EJ78	RPS15	[K7EJ78_HUMAN]	7
Metastasis-associated protein MTA2	O94776	MTA2	[MTA2_HUMAN]	7	8
Ig lambda chain V-III region LOI	P80748	Ig lambda chain V-III region LOI OS=Homo sapiens	[LV302_HUMAN]	7	2
Heterogeneous nuclear ribonucleoproteins A2/B1	P22626	HNRNPA2B1	[ROA2_HUMAN]	7	7
Eukaryotic initiation factor 4A-III	P38919	EIF4A3	[IF4A3_HUMAN]	7	9
T-box transcription factor TBX2	Q13207	TBX2	[TBX2_HUMAN]	7	3
Heterogeneous nuclear ribonucleoprotein C-like 4	P0DMR1	HNRNPCL4	[HNRC4_HUMAN]	7
Nucleophosmin	P06748	NPM1	[NPM_HUMAN]	7	14	4
116 kDa U5 small nuclear ribonucleoprotein component	Q15029	EFTUD2	[U5S1_HUMAN]	6	8
Sarcoplasmic/endoplasmic reticulum calcium ATPase 2	P16615	ATP2A2	[AT2A2_HUMAN]	6	5
LIM domain-binding protein 1	Q86U70	LDB1	[LDB1_HUMAN]	6	6
Metastasis-associated protein MTA1	E7ESY4	MTA1	[E7ESY4_HUMAN]	6	10
Methyl-CpG-binding protein 2	P51608	MECP2	[MECP2_HUMAN]	6	4
MICOS complex subunit MIC60 (Fragment)	H7C463	IMMT	[H7C463_HUMAN]	6	5
Proline-rich protein, Y-linked	Q9H606	PRORY	[PRORY_HUMAN]	6	4
Monocarboxylate transporter 1	P53985	SLC16A1	[MOT1_HUMAN]	6	3
Myb/SANT-like DNA-binding domain-containing protein 4	Q8NCY6	MSANTD4	[MSD4_HUMAN]	6	8
Histone H2A type 1-A	Q96QV6	HIST1H2AA	[H2A1A_HUMAN]	6	8
Inner centromere protein	Q9NQS7	INCENP	[INCE_HUMAN]	6	3
Phosphate carrier protein, mitochondrial	F8VVM2	SLC25A3	[F8VVM2_HUMAN]	6	10
Phenylalanine--tRNA ligase alpha subunit	Q9Y285	FARSA	[SYFA_HUMAN]	6	5
Rho guanine nucleotide exchange factor 2	Q92974	ARHGEF2	[ARHG2_HUMAN]	6	10
PHD finger protein 14	O94880	PHF14	[PHF14_HUMAN]	6	6
Heterogeneous nuclear ribonucleoprotein H	E9PCY7	HNRNPH1	[E9PCY7_HUMAN]	6	6
Histone-lysine N-methyltransferase EHMT1	Q9H9B1	EHMT1	[EHMT1_HUMAN]	6	6
Heterogeneous nuclear ribonucleoprotein U-like protein 1	A0A0A0MRA5	HNRNPUL1	[A0A0A0MRA5_HUMAN]	6
Histone acetyltransferase KAT2A	Q92830	KAT2A	[KAT2A_HUMAN]	6	2
Dr1-associated corepressor (Fragment)	E9PNC7	DRAP1	[E9PNC7_HUMAN]	6	5
Basement membrane-specific heparan sulfate proteoglycan core protein	P98160	HSPG2	[PGBM_HUMAN]	6	7
Calcium-binding mitochondrial carrier protein Aralar1	O75746	SLC25A12	[CMC1_HUMAN]	6	3
Collagen alpha-1(XVIII) chain	P39060	COL18A1	[COIA1_HUMAN]	6	4
Thyroid hormone receptor-associated protein 3	Q9Y2W1	THRAP3	[TR150_HUMAN]	6	11
Sterol regulatory element-binding protein 1	B5MD58	SREBF1	[B5MD58_HUMAN]	6	4
Alpha-internexin	A0A087WYG8	INA	[A0A087WYG8_HUMAN]	6
Barrier-to-autointegration factor	O75531	BANF1	[BAF_HUMAN]	6	21
Zinc finger protein 292	J3KNV1	ZNF292	[J3KNV1_HUMAN]	6	8
S-phase kinase-associated protein 1	E5RJR5	SKP1	[E5RJR5_HUMAN]	6	5
Cullin-1	A0A0C4DGX4	CUL1	[A0A0C4DGX4_HUMAN]	6	6
Centrosomal protein of 112 kDa	F5GYE8	CEP112	[F5GYE8_HUMAN]	6	3
ATP synthase subunit gamma, mitochondrial	P36542	ATP5C1	[ATPG_HUMAN]	6	7	1
Tubulin alpha chain-like 3	A6NHL2	TUBAL3	[TBAL3_HUMAN]	5
Heterogeneous nuclear ribonucleoprotein M	A0A087X0X3	HNRNPM	[A0A087X0X3_HUMAN]	5	10
ATP synthase subunit beta (Fragment)	H0YH81	ATP5B	[H0YH81_HUMAN]	5
Ubiquitin carboxyl-terminal hydrolase 11	G5E9A6	USP11	[G5E9A6_HUMAN]	5	4
Trypsin-3 (Fragment)	B1AN99	PRSS3	[B1AN99_HUMAN]	5	9	7
AP-2 complex subunit beta	A0A087X253	AP2B1	[A0A087X253_HUMAN]	5	3
Histone deacetylase 2	Q92769	HDAC2	[HDAC2_HUMAN]	5	8
Calumenin	O43852	CALU	[CALU_HUMAN]	5	3
PH-interacting protein	Q8WWQ0	PHIP	[PHIP_HUMAN]	5	6
ATP-dependent 6-phosphofructokinase, platelet type	Q01813	PFKP	[PFKAP_HUMAN]	5	3
ATP-dependent RNA helicase DDX39A	O00148	DDX39A	[DX39A_HUMAN]	5	4
AP-2 complex subunit alpha-2	O94973	AP2A2	[AP2A2_HUMAN]	5
Aurora kinase B	Q96GD4	AURKB	[AURKB_HUMAN]	5	5
Heterogeneous nuclear ribonucleoprotein A1	F8W6I7	HNRNPA1	[F8W6I7_HUMAN]	5	4
Telomere-associated protein RIF1	Q5UIP0	RIF1	[RIF1_HUMAN]	5	6
Transcription termination factor 2	Q9UNY4	TTF2	[TTF2_HUMAN]	5	2
Transcription intermediary factor 1-beta	Q13263	TRIM28	[TIF1B_HUMAN]	5	6
Protein MSANTD3-TMEFF1	A0A0A6YYJ0	MSANTD3-TMEFF1	[A0A0A6YYJ0_HUMAN]	5	5
Bifunctional polynucleotide phosphatase/kinase	M0R3C8	PNKP	[M0R3C8_HUMAN]	5
Guanine nucleotide-binding protein G(s) subunit alpha isoforms short	P63092	GNAS	[GNAS2_HUMAN]	5	3
GDNF family receptor alpha-2 (Fragment)	E5RGR6	GFRA2	[E5RGR6_HUMAN]	5	2
General transcription factor II-I	P78347	GTF2I	[GTF2I_HUMAN]	5	2
Heterogeneous nuclear ribonucleoprotein F	P52597	HNRNPF	[HNRPF_HUMAN]	5	7
Nesprin-2	G3V5X4	SYNE2	[G3V5X4_HUMAN]	5	5
Zinc transporter 7	Q8NEW0	SLC30A7	[ZNT7_HUMAN]	5	4
Zinc finger CCCH domain-containing protein 18	Q86VM9	ZC3H18	[ZCH18_HUMAN]	5
40S ribosomal protein S2 (Fragment)	E9PMM9	RPS2	[E9PMM9_HUMAN]	5
Superkiller viralicidic activity 2-like 2	P42285	SKIV2L2	[SK2L2_HUMAN]	5	9
Inosine-5'-monophosphate dehydrogenase 2 (Fragment)	H0Y4R1	IMPDH2	[H0Y4R1_HUMAN]	5	2
STAGA complex 65 subunit gamma	O94864	SUPT7L	[ST65G_HUMAN]	5	2
40S ribosomal protein S3a (Fragment)	H0Y8L7	RPS3A	[H0Y8L7_HUMAN]	5
40S ribosomal protein S4, X isoform	P62701	RPS4X	[RS4X_HUMAN]	5	4
Neurogenic differentiation factor 1	Q13562	NEUROD1	[NDF1_HUMAN]	5	3
Neuropathy target esterase	Q8IY17	PNPLA6	[PLPL6_HUMAN]	5	5
Histone-lysine N-methyltransferase 2A	Q03164	KMT2A	[KMT2A_HUMAN]	5	3
Insulin-like growth factor 2 mRNA-binding protein 3	O00425	IGF2BP3	[IF2B3_HUMAN]	5	6
Very-long-chain enoyl-CoA reductase	Q9NZ01	TECR	[TECR_HUMAN]	5	2
Voltage-dependent calcium channel subunit alpha-2/delta-1	P54289	CACNA2D1	[CA2D1_HUMAN]	5
Sodium/potassium-transporting ATPase subunit alpha-1	P05023	ATP1A1	[AT1A1_HUMAN]	5
Replication protein A 14 kDa subunit	B5MC59	RPA3	[B5MC59_HUMAN]	5	9
Menin	E7EN32	MEN1	[E7EN32_HUMAN]	4	1
Probable ATP-dependent RNA helicase DDX5	J3KTA4	DDX5	[J3KTA4_HUMAN]	4	9
Zinc finger protein 608	Q9ULD9	ZNF608	[ZN608_HUMAN]	4	3
Mitochondrial 2-oxoglutarate/malate carrier protein (Fragment)	I3L1P8	SLC25A11	[I3L1P8_HUMAN]	4	4
Transcription factor 4 (Fragment)	A0A0D9SG78	TCF4	[A0A0D9SG78_HUMAN]	4
Guanine nucleotide-binding protein G(I)/G(S)/G(T) subunit beta-1 (Fragment)	B1AKQ8	GNB1	[B1AKQ8_HUMAN]	4
Glypican-6	Q9Y625	GPC6	[GPC6_HUMAN]	4	6
Zinc finger protein 644	Q9H582	ZNF644	[ZN644_HUMAN]	4	6
Zinc finger protein with KRAB and SCAN domains 1	P17029	ZKSCAN1	[ZKSC1_HUMAN]	4
Anthrax toxin receptor 1	Q9H6X2	ANTXR1	[ANTR1_HUMAN]	4	1
Limbic system-associated membrane protein	F5H5G1	LSAMP	[F5H5G1_HUMAN]	4
Brain acid soluble protein 1	P80723	BASP1	[BASP1_HUMAN]	4	3
Interleukin enhancer-binding factor 3	Q12906	ILF3	[ILF3_HUMAN]	4	5
UV excision repair protein RAD23 homolog B	P54727	RAD23B	[RD23B_HUMAN]	4
Transcriptional repressor p66-alpha	Q86YP4	GATAD2A	[P66A_HUMAN]	4	4
DNA polymerase beta (Fragment)	E7EW18	POLB	[E7EW18_HUMAN]	4	6
Highly divergent homeobox	Q7Z353	HDX	[HDX_HUMAN]	4	5
Twist-related protein 1 (Fragment)	H7BY00	TWIST1	[H7BY00_HUMAN]	4	3
ATP-dependent RNA helicase A	Q08211	DHX9	[DHX9_HUMAN]	4	8
Argininosuccinate synthase	P00966	ASS1	[ASSY_HUMAN]	4	1
40S ribosomal protein S8	Q5JR95	RPS8	[Q5JR95_HUMAN]	4	3
60 kDa heat shock protein, mitochondrial	P10809	HSPD1	[CH60_HUMAN]	4
ATP-dependent 6-phosphofructokinase, muscle type	P08237	PFKM	[PFKAM_HUMAN]	4	4
60S acidic ribosomal protein P0 (Fragment)	F8VPE8	RPLP0	[F8VPE8_HUMAN]	4	2
Interleukin enhancer-binding factor 2	B4DY09	ILF2	[B4DY09_HUMAN]	4	4
Contactin-2	Q02246	CNTN2	[CNTN2_HUMAN]	4	2
Chromodomain-helicase-DNA-binding protein 1	O14646	CHD1	[CHD1_HUMAN]	4	6
SUN domain-containing protein 1 (Fragment)	H0Y6N5	SUN1	[H0Y6N5_HUMAN]	4
Eukaryotic initiation factor 4A-I	P60842	EIF4A1	[IF4A1_HUMAN]	4	3
Charged multivesicular body protein 4b	Q9H444	CHMP4B	[CHM4B_HUMAN]	4	4
TATA-box-binding protein	Q32MN6	TBP	[Q32MN6_HUMAN]	4	5
Centrosomal protein of 97 kDa	E9PG22	CEP97	[E9PG22_HUMAN]	4	3
Contactin-1	Q12860	CNTN1	[CNTN1_HUMAN]	4	1
T-complex protein 1 subunit gamma	B4DUR8	CCT3	[B4DUR8_HUMAN]	4	3
DNA (cytosine-5)-methyltransferase 3A	A0A0C4DG02	DNMT3A	[A0A0C4DG02_HUMAN]	4	2
Putative ribosome-binding factor A, mitochondrial	Q8N0V3	RBFA	[RBFA_HUMAN]	4	2
Protein O-linked-mannose beta-1,4-N-acetylglucosaminyltransferase 2	Q8NAT1	POMGNT2	[PMGT2_HUMAN]	4
Protein MMS22-like	E2QRD4	MMS22L	[E2QRD4_HUMAN]	4	5
Flotillin-1	O75955	FLOT1	[FLOT1_HUMAN]	4	2
L-lactate dehydrogenase A chain	P00338	LDHA	[LDHA_HUMAN]	4	3	2
Galactokinase	P51570	GALK1	[GALK1_HUMAN]	4	1
DnaJ homolog subfamily A member 3, mitochondrial	Q96EY1	DNAJA3	[DNJA3_HUMAN]	4
NADH dehydrogenase [ubiquinone] 1 alpha subcomplex subunit 9, mitochondrial	Q16795	NDUFA9	[NDUA9_HUMAN]	3	4
Junctophilin-1	Q9HDC5	JPH1	[JPH1_HUMAN]	3	7
Coatomer subunit beta	P53618	COPB1	[COPB_HUMAN]	3	5
Importin subunit alpha-1 (Fragment)	J3QLL0	KPNA2	[J3QLL0_HUMAN]	3	1
Citrate synthase	A0A0C4DGI3	CS	[A0A0C4DGI3_HUMAN]	3
Actin-like protein 6A	O96019	ACTL6A	[ACL6A_HUMAN]	3	1
Ribosomal protein L15 (Fragment)	E7EQV9	RPL15	[E7EQV9_HUMAN]	3	2
Single-stranded DNA-binding protein 3	A0A087WVT6	SSBP3	[A0A087WVT6_HUMAN]	3	4
High mobility group protein 20A (Fragment)	H0YKL0	HMG20A	[H0YKL0_HUMAN]	3
Aprataxin and PNK-like factor	Q8IW19	APLF	[APLF_HUMAN]	3	3
28S ribosomal protein S9, mitochondrial	P82933	MRPS9	[RT09_HUMAN]	3	2
SWI/SNF-related matrix-associated actin-dependent regulator of chromatin subfamily A-like protein 1 (Fragment)	H7BYI2	SMARCAL1	[H7BYI2_HUMAN]	3
RNA-binding motif protein, X chromosome (Fragment)	H0Y6E7	RBMX	[H0Y6E7_HUMAN]	3	7
Sister chromatid cohesion protein PDS5 homolog B	Q9NTI5	PDS5B	[PDS5B_HUMAN]	3	3
Integrator complex subunit 7	Q9NVH2	INTS7	[INT7_HUMAN]	3
Homeobox protein Meis1 (Fragment)	E9PDC4	MEIS1	[E9PDC4_HUMAN]	3
60S ribosomal protein L7	P18124	RPL7	[RL7_HUMAN]	3	5
60S ribosomal protein L8 (Fragment)	E9PKZ0	RPL8	[E9PKZ0_HUMAN]	3	3
DnaJ homolog subfamily C member 9	Q8WXX5	DNAJC9	[DNJC9_HUMAN]	3	5
Inter-alpha-trypsin inhibitor heavy chain H2	Q5T985	ITIH2	[Q5T985_HUMAN]	3
Nuclear pore complex protein Nup107	P57740	NUP107	[NU107_HUMAN]	3	3
Alpha-2-macroglobulin	P01023	A2M	[A2MG_HUMAN]	3	2	1
Ig gamma-2 chain C region	P01859	IGHG2	[IGHG2_HUMAN]	3	3	4
Glyceraldehyde-3-phosphate dehydrogenase	E7EUT5	GAPDH	[E7EUT5_HUMAN]	3	3
Zinc finger protein 219	Q9P2Y4	ZNF219	[ZN219_HUMAN]	3	3
Acylglycerol kinase, mitochondrial	E9PG39	AGK	[E9PG39_HUMAN]	3	2
Helix-loop-helix protein 2 (Fragment)	A6PVY9	NHLH2	[A6PVY9_HUMAN]	3	2
IQ motif and SEC7 domain-containing protein 1	A0A0C4DGT3	IQSEC1	[A0A0C4DGT3_HUMAN]	3
Delta(3,5)-Delta(2,4)-dienoyl-CoA isomerase, mitochondrial	Q13011	ECH1	[ECH1_HUMAN]	3	5
DnaJ homolog subfamily B member 6	O75190	DNAJB6	[DNJB6_HUMAN]	3
Abnormal spindle-like microcephaly-associated protein	Q8IZT6	ASPM	[ASPM_HUMAN]	3
SAGA-associated factor 29	Q96ES7	SGF29	[SGF29_HUMAN]	3
Transcriptional adapter 1	Q96BN2	TADA1	[TADA1_HUMAN]	3	1
Matrin-3	D6REM6	MATR3	[D6REM6_HUMAN]	3	4
Zinc finger protein castor homolog 1	Q86V15	CASZ1	[CASZ1_HUMAN]	3	2
Elongation factor 1-gamma	P26641	EEF1G	[EF1G_HUMAN]	3
Pre-mRNA-processing-splicing factor 8	Q6P2Q9	PRPF8	[PRP8_HUMAN]	3	7
Transcription factor E2-alpha	P15923	TCF3	[TFE2_HUMAN]	3	2
Casein kinase II subunit alpha'	P19784	CSNK2A2	[CSK22_HUMAN]	3	2
Cat eye syndrome critical region protein 2	Q9BXF3	CECR2	[CECR2_HUMAN]	3
Heart- and neural crest derivatives-expressed protein 1	O96004	HAND1	[HAND1_HUMAN]	3	2
Zinc finger protein 90	A0A087WZ27	ZNF90	[A0A087WZ27_HUMAN]	3	2
Casein kinase II subunit alpha	E7EU96	CSNK2A1	[E7EU96_HUMAN]	3	2
Trans-acting T-cell-specific transcription factor GATA-3	P23771	GATA3	[GATA3_HUMAN]	3	3
Torsin-1A-interacting protein 1	A0A0A0MSK5	TOR1AIP1	[A0A0A0MSK5_HUMAN]	3	2
CAD protein	F8VPD4	CAD	[F8VPD4_HUMAN]	3	2	1
Lysine-specific histone demethylase 1A	O60341	KDM1A	[KDM1A_HUMAN]	3	3
Protein Dr1	Q01658	DR1	[NC2B_HUMAN]	3	1
General transcription factor II-I repeat domain-containing protein 1	Q9UHL9	GTF2IRD1	[GT2D1_HUMAN]	3
Glycogen phosphorylase, brain form	P11216	PYGB	[PYGB_HUMAN]	3	2
Heart- and neural crest derivatives-expressed protein 2	A0A087WT70	HAND2	[A0A087WT70_HUMAN]	3	5
Zinc finger protein 384	Q8TF68	ZNF384	[ZN384_HUMAN]	3	3
Putative ATP-dependent RNA helicase DHX30	H7BXY3	DHX30	[H7BXY3_HUMAN]	3	6
Elongation factor Tu, mitochondrial	P49411	TUFM	[EFTU_HUMAN]	3	3
Chromobox protein homolog 1 (Fragment)	B5MD17	CBX1	[B5MD17_HUMAN]	3
ATP-binding cassette sub-family D member 3	P28288	ABCD3	[ABCD3_HUMAN]	3	3
DNA repair protein RAD52 homolog	P43351	RAD52	[RAD52_HUMAN]	3	6
Importin-9	Q96P70	IPO9	[IPO9_HUMAN]	3	2
Heterogeneous nuclear ribonucleoprotein A3	P51991	HNRNPA3	[ROA3_HUMAN]	3	4
Exportin-1	O14980	XPO1	[XPO1_HUMAN]	3
S phase cyclin A-associated protein in the endoplasmic reticulum (Fragment)	H3BPM0	SCAPER	[H3BPM0_HUMAN]	3	1
RuvB-like 1	Q9Y265	RUVBL1	[RUVB1_HUMAN]	3
Insulin gene enhancer protein ISL-1	D6RBJ1	ISL1	[D6RBJ1_HUMAN]	2	2
Lamin-B receptor	Q14739	LBR	[LBR_HUMAN]	2
28S ribosomal protein S7, mitochondrial	J3QKW2	MRPS7	[J3QKW2_HUMAN]	2	3
Kelch-like protein 7	Q8IXQ5	KLHL7	[KLHL7_HUMAN]	2	1
DNA mismatch repair protein Msh2	V9H019	MSH2	[V9H019_HUMAN]	2
40S ribosomal protein S24	E7ETK0	RPS24	[E7ETK0_HUMAN]	2	2
Cytoskeleton-associated protein 2	Q8WWK9	CKAP2	[CKAP2_HUMAN]	2	2
14-3-3 protein epsilon (Fragment)	K7EM20	YWHAE	[K7EM20_HUMAN]	2	1
40S ribosomal protein S10	P46783	RPS10	[RS10_HUMAN]	2	4	1
DNA repair protein complementing XP-C cells	Q01831	XPC	[XPC_HUMAN]	2	4
40S ribosomal protein S18	P62269	RPS18	[RS18_HUMAN]	2		1
Kinesin-like protein	A0A0C4DGP2	KIF18B	[A0A0C4DGP2_HUMAN]	2	1
DNA replication ATP-dependent helicase/nuclease DNA2	P51530	DNA2	[DNA2_HUMAN]	2
Isocitrate dehydrogenase [NADP], mitochondrial	P48735	IDH2	[IDHP_HUMAN]	2
Dihydropyrimidinase-related protein 3 (Fragment)	H0YBT4	DPYSL3	[H0YBT4_HUMAN]	2
DNA helicase MCM8	Q9UJA3	MCM8	[MCM8_HUMAN]	2	1
Histone H1.2	P16403	HIST1H1C	[H12_HUMAN]	2
Basigin	A0A087WUV8	BSG	[A0A087WUV8_HUMAN]	2
Heterogeneous nuclear ribonucleoprotein L (Fragment)	M0QYL7	HNRNPL	[M0QYL7_HUMAN]	2
Chromatin assembly factor 1 subunit B	Q13112	CHAF1B	[CAF1B_HUMAN]	2
Erlin-2 (Fragment)	E5RHW4	ERLIN2	[E5RHW4_HUMAN]	2
Centromere protein X (Fragment)	J3QR01	STRA13	[J3QR01_HUMAN]	2	1
Heparan sulfate 2-O-sulfotransferase 1	Q7LGA3	HS2ST1	[HS2ST_HUMAN]	2
BAG family molecular chaperone regulator 2	O95816	BAG2	[BAG2_HUMAN]	2	2
Adenosylhomocysteinase	P23526	AHCY	[SAHH_HUMAN]	2
Centriolar coiled-coil protein of 110 kDa	O43303	CCP110	[CP110_HUMAN]	2	4
ELAV-like protein 2 (Fragment)	C9JB16	ELAVL2	[C9JB16_HUMAN]	2
Filamin-C	Q14315	FLNC	[FLNC_HUMAN]	2
BEN domain-containing protein 3	Q5T5X7	BEND3	[BEND3_HUMAN]	2	2
Borealin	Q53HL2	CDCA8	[BOREA_HUMAN]	2	1
Formin-like protein 2	Q96PY5	FMNL2	[FMNL2_HUMAN]	2
GTP-binding nuclear protein Ran	P62826	RAN	[RAN_HUMAN]	2
GDNF family receptor alpha-1	P56159	GFRA1	[GFRA1_HUMAN]	2
General transcription factor 3C polypeptide 3	Q9Y5Q9	GTF3C3	[TF3C3_HUMAN]	2
Band 4.1-like protein 3 (Fragment)	A0A0J9YY18	EPB41L3	[A0A0J9YY18_HUMAN]	2
Histone H3.2	Q71DI3	HIST2H3A	[H32_HUMAN]	2	5
Cullin-3	Q13618	CUL3	[CUL3_HUMAN]	2
DnaJ (Hsp40) homolog, subfamily C, member 16, isoform CRA_a	Q5TDG9	DNAJC16	[Q5TDG9_HUMAN]	2	1
Importin subunit beta-1	Q14974	KPNB1	[IMB1_HUMAN]	2	3
Creatine kinase U-type, mitochondrial (Fragment)	C9J995	CKMT1B	[C9J995_HUMAN]	2
Immunoglobulin lambda-like polypeptide 5	B9A064	IGLL5	[IGLL5_HUMAN]	2		1
60S ribosomal protein L13	P26373	RPL13	[RL13_HUMAN]	2	2
60S ribosomal protein L14	P50914	RPL14	[RL14_HUMAN]	2	2
Heterogeneous nuclear ribonucleoprotein Q	B7Z645	SYNCRIP	[B7Z645_HUMAN]	2	3
Dolichol-phosphate mannosyltransferase subunit 1	O60762	DPM1	[DPM1_HUMAN]	2	1
Ataxin-7-like protein 2	A0A087X1E6	ATXN7L2	[A0A087X1E6_HUMAN]	2
Activity-dependent neuroprotector homeobox protein	Q9H2P0	ADNP	[ADNP_HUMAN]	2	1
Histone H1.5	P16401	HIST1H1B	[H15_HUMAN]	2	2
Histone deacetylase complex subunit SAP18 (Fragment)	H7BZW6	SAP18	[H7BZW6_HUMAN]	2	2
Complement component 1 Q subcomponent-binding protein, mitochondrial	Q07021	C1QBP	[C1QBP_HUMAN]	2
Histone chaperone ASF1A	Q9Y294	ASF1A	[ASF1A_HUMAN]	2	1
ELAV-like protein	B1APY9	ELAVL4	[B1APY9_HUMAN]	2
Cyclic AMP-responsive element-binding protein 1 (Fragment)	C9J4L5	CREB1	[C9J4L5_HUMAN]	2
60S ribosomal protein L23 (Fragment)	C9JD32	RPL23	[C9JD32_HUMAN]	2
Pre-mRNA-processing factor 19	Q9UMS4	PRPF19	[PRP19_HUMAN]	2	1
TAF5-like RNA polymerase II p300/CBP-associated factor-associated factor 65 kDa subunit 5L	O75529	TAF5L	[TAF5L_HUMAN]	2	1
Protein-L-isoaspartate(D-aspartate) O-methyltransferase	P22061	PCMT1	[PIMT_HUMAN]	2	4	3
SWI/SNF-related matrix-associated actin-dependent regulator of chromatin subfamily D member 2	J3KMX2	SMARCD2	[J3KMX2_HUMAN]	2
Suppressor of tumorigenicity 7 protein	E7EPW5	ST7	[E7EPW5_HUMAN]	2	3
Myristoylated alanine-rich C-kinase substrate	A0A087WZH7	MARCKS	[A0A087WZH7_HUMAN]	2	1
Neuroblastoma-amplified sequence (Fragment)	H0Y5G7	NBAS	[H0Y5G7_HUMAN]	2	2
Neurogenic differentiation factor 2	Q15784	NEUROD2	[NDF2_HUMAN]	2
Nucleolar protein 58	Q9Y2X3	NOP58	[NOP58_HUMAN]	2	1
Store-operated calcium entry-associated regulatory factor (Fragment)	E5RHW0	SARAF	[E5RHW0_HUMAN]	2
rRNA adenine N(6)-methyltransferase	D6RCL3	DIMT1	[D6RCL3_HUMAN]	2	3
Transcription factor SPT20 homolog (Fragment)	H7C5F9	SUPT20H	[H7C5F9_HUMAN]	2
Transcription elongation regulator 1	O14776	TCERG1	[TCRG1_HUMAN]	2	1
Transcription initiation factor TFIID subunit 10	Q12962	TAF10	[TAF10_HUMAN]	2
Prolyl 4-hydroxylase subunit alpha-1	P13674	P4HA1	[P4HA1_HUMAN]	2	1
Poly(rC)-binding protein 1	Q15365	PCBP1	[PCBP1_HUMAN]	2	1
Transcriptional adapter 2-beta	Q86TJ2	TADA2B	[TAD2B_HUMAN]	2	2
Nuclear pore complex protein Nup205	Q92621	NUP205	[NU205_HUMAN]	2
WD repeat-containing protein 5	P61964	WDR5	[WDR5_HUMAN]	2	2
Transcriptional adapter 3	O75528	TADA3	[TADA3_HUMAN]	2
Nuclease-sensitive element-binding protein 1	A0A087X1S2	YBX1	[A0A087X1S2_HUMAN]	2	4
RNA cytidine acetyltransferase	Q9H0A0	NAT10	[NAT10_HUMAN]	2
Tricarboxylate transport protein, mitochondrial	P53007	SLC25A1	[TXTP_HUMAN]	2	1
Voltage-dependent anion-selective channel protein 2 (Fragment)	A0A0A0MR02	VDAC2	[A0A0A0MR02_HUMAN]	2
Origin recognition complex subunit 1	Q13415	ORC1	[ORC1_HUMAN]	2	1
RNA-binding protein Raly (Fragment)	Q5QPM0	RALY	[Q5QPM0_HUMAN]	2	3
Tyrosine-protein kinase Fyn	P06241	FYN	[FYN_HUMAN]	2	1
Protein TRAJ12 (Fragment)	A0A075B6U8	TRAJ12	[A0A075B6U8_HUMAN]	2	1
Proliferating cell nuclear antigen	P12004	PCNA	[PCNA_HUMAN]	2	1
Threonylcarbamoyladenosine tRNA methylthiotransferase	Q5VV42	CDKAL1	[CDKAL_HUMAN]	2	1
Uncharacterized protein C17orf80	I3L072	C17orf80	[I3L072_HUMAN]	2	6
T-complex protein 1 subunit theta	P50990	CCT8	[TCPQ_HUMAN]	2
UPF0461 protein C5orf24	Q7Z6I8	C5orf24	[CE024_HUMAN]	2	4
Testis-expressed sequence 10 protein	Q9NXF1	TEX10	[TEX10_HUMAN]	2	2
Lysine-specific demethylase 2B	S4R3G4	KDM2B	[S4R3G4_HUMAN]	2
T-box transcription factor TBX3	A0A087WW95	TBX3	[A0A087WW95_HUMAN]	2	1
Mitochondrial dicarboxylate carrier	Q9UBX3	SLC25A10	[DIC_HUMAN]	2	2
Methyl-CpG-binding domain protein 3	O95983	MBD3	[MBD3_HUMAN]	2	2
Unconventional myosin-IXb (Fragment)	M0R300	MYO9B	[M0R300_HUMAN]	2
ATP-citrate synthase	P53396	ACLY	[ACLY_HUMAN]	1
Protein RRP5 homolog	Q14690	PDCD11	[RRP5_HUMAN]	1
Retinitis pigmentosa 9 protein	Q8TA86	RP9	[RP9_HUMAN]	1	2
FK506-binding protein 15	Q5T1M5	FKBP15	[FKB15_HUMAN]	1
Retinoblastoma-binding protein 5	Q15291	RBBP5	[RBBP5_HUMAN]	1
Tubulin--tyrosine ligase-like protein 12	Q14166	TTLL12	[TTL12_HUMAN]	1
Fatty acid synthase	P49327	FASN	[FAS_HUMAN]	1	1
Fatty acyl-CoA reductase 1 (Fragment)	E9PNW8	FAR1	[E9PNW8_HUMAN]	1	1
Ataxin-7-like protein 3 (Fragment)	K7ENU1	ATXN7L3	[K7ENU1_HUMAN]	1
Retinoic acid-induced protein 1	Q7Z5J4	RAI1	[RAI1_HUMAN]	1
Atherin	E9PIW9	SAMD1	[E9PIW9_HUMAN]	1	1
cAMP-dependent protein kinase catalytic subunit beta	A0A087WVC4	PRKACB	[A0A087WVC4_HUMAN]	1
DnaJ homolog subfamily A member 2	O60884	DNAJA2	[DNJA2_HUMAN]	1
Treslin	Q7Z2Z1	TICRR	[TICRR_HUMAN]	1	1
Rhodopsin	P08100	RHO	[OPSD_HUMAN]	1
Ataxin-7	O15265	ATXN7	[ATX7_HUMAN]	1
RNA-binding protein Musashi homolog 1	O43347	MSI1	[MSI1H_HUMAN]	1
Arginine--tRNA ligase, cytoplasmic	P54136	RARS	[SYRC_HUMAN]	1
Tubulin polyglutamylase TTLL13P	A6NNM8	TTLL13P	[TTL13_HUMAN]	1
F-box/SPRY domain-containing protein 1	P0C2W1	FBXO45	[FBSP1_HUMAN]	1	1
RNA binding protein S1, serine-rich domain, isoform CRA_c	H3BPG5	RNPS1	[H3BPG5_HUMAN]	1	2
Transthyretin	A0A087WV45	TTR	[A0A087WV45_HUMAN]	1	1
Aldehyde dehydrogenase X, mitochondrial	P30837	ALDH1B1	[AL1B1_HUMAN]	1
RNA-binding protein 39 (Fragment)	Q5QP22	RBM39	[Q5QP22_HUMAN]	1	1
RNA-binding protein 8A	Q9Y5S9	RBM8A	[RBM8A_HUMAN]	1	1
Rho guanine nucleotide exchange factor 17	Q96PE2	ARHGEF17	[ARHGH_HUMAN]	1
Prothrombin	E9PIT3	F2	[E9PIT3_HUMAN]	1
Dynein heavy chain 12, axonemal	Q6ZR08	DNAH12	[DYH12_HUMAN]	1
Rapamycin-insensitive companion of mTOR	Q6R327	RICTOR	[RICTR_HUMAN]	1	2
AP-2 complex subunit mu (Fragment)	C9JTK4	AP2M1	[C9JTK4_HUMAN]	1
Pyruvate kinase	B4DNK4	PKM	[B4DNK4_HUMAN]	1
Elongation factor 2	P13639	EEF2	[EF2_HUMAN]	1
AP-3 complex subunit delta-1	O14617	AP3D1	[AP3D1_HUMAN]	1
Uncharacterized protein	A0A087WZT3	Uncharacterized protein OS=Homo sapiens	[A0A087WZT3_HUMAN]	1
Annexin A2 (Fragment)	H0YLE2	ANXA2	[H0YLE2_HUMAN]	1
EMILIN-1 (Fragment)	A0A0A0MT20	EMILIN1	[A0A0A0MT20_HUMAN]	1
Eukaryotic translation initiation factor 3 subunit C	Q99613	EIF3C	[EIF3C_HUMAN]	1
Enoyl-CoA delta isomerase 2, mitochondrial	A0A0C4DGA2	ECI2	[A0A0C4DGA2_HUMAN]	1
Antithrombin-III	Q8TCE1	SERPINC1	[Q8TCE1_HUMAN]	1
Protein-L-isoaspartate O-methyltransferase domain-containing protein 2 (Fragment)	V9GYL1	PCMTD2	[V9GYL1_HUMAN]	1
Uncharacterized protein (Fragment)	A0A0C4DH43	Uncharacterized protein (Fragment) OS=Homo sapiens	[A0A0C4DH43_HUMAN]	1
Eukaryotic translation initiation factor 3 subunit D (Fragment)	B0QYA4	EIF3D	[B0QYA4_HUMAN]	1
E3 ubiquitin-protein ligase RING2 (Fragment)	X6RFN3	RNF2	[X6RFN3_HUMAN]	1	1
Drebrin (Fragment)	D6R9W4	DBN1	[D6R9W4_HUMAN]	1
E1A-binding protein p400	Q96L91	EP400	[EP400_HUMAN]	1	1
AP-1 complex subunit mu-2 (Fragment)	K7EPR4	AP1M2	[K7EPR4_HUMAN]	1
RecQ-mediated genome instability protein 2	Q96E14	RMI2	[RMI2_HUMAN]	1	1
Fanconi anemia group I protein (Fragment)	H3BP78	FANCI	[H3BP78_HUMAN]	1
Protein transport protein Sec61 subunit alpha isoform 1	P61619	SEC61A1	[S61A1_HUMAN]	1
U3 small nucleolar RNA-associated protein 6 homolog (Fragment)	J3KRR8	UTP6	[J3KRR8_HUMAN]	1
Tumor suppressor candidate 3	D6RDV0	TUSC3	[D6RDV0_HUMAN]	1	1
E3 ubiquitin-protein ligase RNF19A (Fragment)	E7EQ63	RNF19A	[E7EQ63_HUMAN]	1
Ankyrin repeat and KH domain-containing protein 1 (Fragment)	H7C2F5	ANKHD1	[H7C2F5_HUMAN]	1
E3 ubiquitin-protein ligase UBR1 (Fragment)	H3BUC4	UBR1	[H3BUC4_HUMAN]	1
Apoptotic chromatin condensation inducer in the nucleus	S4R3H4	ACIN1	[S4R3H4_HUMAN]	1	4
AP-3 complex subunit mu-2 (Fragment)	H0YBM0	AP3M2	[H0YBM0_HUMAN]	1
Eyes absent homolog	E7EQM5	EYA1	[E7EQM5_HUMAN]	1	4
Ras-responsive element-binding protein 1 (Fragment)	C9JU34	RREB1	[C9JU34_HUMAN]	1
Chromosome alignment-maintaining phosphoprotein 1	Q96JM3	CHAMP1	[CHAP1_HUMAN]	1
TRAF2 and NCK-interacting protein kinase (Fragment)	C9J338	TNIK	[C9J338_HUMAN]	1
Charged multivesicular body protein 3	Q9Y3E7	CHMP3	[CHMP3_HUMAN]	1	2
Charged multivesicular body protein 6 (Fragment)	I3L3E4	CHMP6	[I3L3E4_HUMAN]	1
Chromatin complexes subunit BAP18	F8W038	C17orf49	[F8W038_HUMAN]	1	1
Transcription factor COE1	A0A087WTE5	EBF1	[A0A087WTE5_HUMAN]	1
Chromobox protein homolog 5	P45973	CBX5	[CBX5_HUMAN]	1
ATP-dependent RNA helicase DDX3X (Fragment)	A0A087WVZ1	DDX3X	[A0A087WVZ1_HUMAN]	1	1
Chromodomain-helicase-DNA-binding protein 2 (Fragment)	A0A0D9SF92	CHD2	[A0A0D9SF92_HUMAN]	1
Ceroid-lipofuscinosis neuronal protein 5	O75503	CLN5	[CLN5_HUMAN]	1
Succinyl-CoA ligase [ADP-forming] subunit beta, mitochondrial	Q9P2R7	SUCLA2	[SUCB1_HUMAN]	1
Structural maintenance of chromosomes protein 3	Q9UQE7	SMC3	[SMC3_HUMAN]	1	2
Clathrin interactor 1	Q14677	CLINT1	[EPN4_HUMAN]	1
Coatomer subunit alpha	P53621	COPA	[COPA_HUMAN]	1	1
Coatomer subunit epsilon	A0A087X0I4	COPE	[A0A087X0I4_HUMAN]	1
Bifunctional methylenetetrahydrofolate dehydrogenase/cyclohydrolase, mitochondrial	B9A062	MTHFD2	[B9A062_HUMAN]	1
Complement C4-B	A0A0G2JL54	C4B_2	[A0A0G2JL54_HUMAN]	1	1
SWI/SNF complex subunit SMARCC1	Q92922	SMARCC1	[SMRC1_HUMAN]	1
Cell cycle and apoptosis regulator protein 2 (Fragment)	H0YC69	CCAR2	[H0YC69_HUMAN]	1	1
Tetratricopeptide repeat protein 17 (Fragment)	A0A075B7B2	TTC17	[A0A075B7B2_HUMAN]	1
Carnitine O-palmitoyltransferase 1, liver isoform	P50416	CPT1A	[CPT1A_HUMAN]	1
Tetratricopeptide repeat protein 13	Q8NBP0	TTC13	[TTC13_HUMAN]	1	1
Casein kinase II subunit beta	P67870	CSNK2B	[CSK2B_HUMAN]	1
Calpain-1 catalytic subunit	P07384	CAPN1	[CAN1_HUMAN]	1
Tensin-4	Q8IZW8	TNS4	[TENS4_HUMAN]	1
Catenin beta-1	B4DGU4	CTNNB1	[B4DGU4_HUMAN]	1	1
Charged multivesicular body protein 1b	Q7LBR1	CHMP1B	[CHM1B_HUMAN]	1
CCAAT/enhancer-binding protein gamma	P53567	CEBPG	[CEBPG_HUMAN]	1	1
cGMP-dependent 3',5'-cyclic phosphodiesterase (Fragment)	H0YFL1	PDE2A	[H0YFL1_HUMAN]	1
Centrin-2	P41208	CETN2	[CETN2_HUMAN]	1
Telomere length regulation protein TEL2 homolog	H3BRS3	TELO2	[H3BRS3_HUMAN]	1
Centromere protein S (Fragment)	K7ESB0	APITD1	[K7ESB0_HUMAN]	1	2
T-complex protein 1 subunit delta	P50991	CCT4	[TCPD_HUMAN]	1	1
T-complex protein 1 subunit alpha (Fragment)	F5H726	TCP1	[F5H726_HUMAN]	1
C-1-tetrahydrofolate synthase, cytoplasmic	P11586	MTHFD1	[C1TC_HUMAN]	1
Complement component C7	P10643	C7	[CO7_HUMAN]	1
THO complex subunit 4	Q86V81	ALYREF	[THOC4_HUMAN]	1	3
Serine/threonine-protein phosphatase PP1-beta catalytic subunit	F8WE71	PPP1CB	[F8WE71_HUMAN]	1
Complement C5	P01031	C5	[CO5_HUMAN]	1
DDB1- and CUL4-associated factor 17	F5H7W1	DCAF17	[F5H7W1_HUMAN]	1
Dehydrogenase/reductase SDR family member 2, mitochondrial (Fragment)	H0YJG9	DHRS2	[H0YJG9_HUMAN]	1	1
Serpin B6	P35237	SERPINB6	[SPB6_HUMAN]	1
Transducin beta-like protein 2	E9PF19	TBL2	[E9PF19_HUMAN]	1
Band 4.1-like protein 2 (Fragment)	E9PMG5	EPB41L2	[E9PMG5_HUMAN]	1
FERM, RhoGEF and pleckstrin domain-containing protein 1 (Fragment)	M0R262	FARP1	[M0R262_HUMAN]	1
D-3-phosphoglycerate dehydrogenase	Q5SZU1	PHGDH	[Q5SZU1_HUMAN]	1
A-kinase anchor protein 8-like (Fragment)	M0R1Y5	AKAP8L	[M0R1Y5_HUMAN]	1
Cytoskeleton-associated protein 5 (Fragment)	E9PQH5	CKAP5	[E9PQH5_HUMAN]	1
Translation initiation factor eIF-2B subunit delta	A0A087WTA5	EIF2B4	[A0A087WTA5_HUMAN]	1	1
Serine/threonine-protein phosphatase 2A 65 kDa regulatory subunit A alpha isoform (Fragment)	E9PH38	PPP2R1A	[E9PH38_HUMAN]	1
DNA helicase MCM9 (Fragment)	H0Y6M9	MCM9	[H0Y6M9_HUMAN]	1
Serine/threonine-protein kinase mTOR	B1AKP8	MTOR	[B1AKP8_HUMAN]	1
Translocon-associated protein subunit delta	A6NLM8	SSR4	[A6NLM8_HUMAN]	1	1
L-lactate dehydrogenase B chain (Fragment)	F5H793	LDHB	[F5H793_HUMAN]	1
Septin-14	Q6ZU15	SEPT14	[SEP14_HUMAN]	1
Dihydropyrimidinase-related protein 5	Q9BPU6	DPYSL5	[DPYL5_HUMAN]	1
CTP synthase 1	P17812	CTPS1	[PYRG1_HUMAN]	1	1
Transmembrane protein 131	Q92545	TMEM131	[TM131_HUMAN]	1	2
Complex I assembly factor TIMMDC1, mitochondrial (Fragment)	C9JR82	TIMMDC1	[C9JR82_HUMAN]	1
Condensin complex subunit 3 (Fragment)	H0Y9Z8	NCAPG	[H0Y9Z8_HUMAN]	1	1
Conserved oligomeric Golgi complex subunit 1	A0A087WVI0	COG1	[A0A087WVI0_HUMAN]	1
Spliceosome-associated protein CWC15 homolog	Q9P013	CWC15	[CWC15_HUMAN]	1	1
Solute carrier family 2, facilitated glucose transporter member 1	P11166	SLC2A1	[GTR1_HUMAN]	1
Small ubiquitin-related modifier 2	P61956	SUMO2	[SUMO2_HUMAN]	1	2
Dachshund homolog 2	D6REJ4	DACH2	[D6REJ4_HUMAN]	1	1
Skin-specific protein 32	Q5T750	XP32	[XP32_HUMAN]	1
Splicing factor, proline- and glutamine-rich	P23246	SFPQ	[SFPQ_HUMAN]	1
SH3 and multiple ankyrin repeat domains protein 1	Q9Y566	SHANK1	[SHAN1_HUMAN]	1
Cullin-associated NEDD8-dissociated protein 1 (Fragment)	A0A0C4DGH5	CAND1	[A0A0C4DGH5_HUMAN]	1
Cyclic AMP-dependent transcription factor ATF-2	E9PEK8	ATF2	[E9PEK8_HUMAN]	1	1
Transcription regulator protein BACH1 (Fragment)	H7C4B6	BACH1	[H7C4B6_HUMAN]	1
Serum amyloid P-component	P02743	APCS	[SAMP_HUMAN]	1
Cyclin-Y-like protein 1 (Fragment)	H7C0P7	CCNYL1	[H7C0P7_HUMAN]	1
Cytochrome b-c1 complex subunit 2, mitochondrial (Fragment)	H3BP04	UQCRC2	[H3BP04_HUMAN]	1
Transcription initiation protein SPT3 homolog	O75486	SUPT3H	[SUPT3_HUMAN]	1
Nucleolysin TIAR	Q01085	TIAL1	[TIAR_HUMAN]	1
Nuclear receptor corepressor 2	C9J7T7	NCOR2	[C9J7T7_HUMAN]	1	1
Kinectin	Q86UP2	KTN1	[KTN1_HUMAN]	1
28S ribosomal protein S2, mitochondrial	Q9Y399	MRPS2	[RT02_HUMAN]	1	2
Histone acetyltransferase	E7EUP3	KAT7	[E7EUP3_HUMAN]	1
28S ribosomal protein S22, mitochondrial (Fragment)	C9J5D8	MRPS22	[C9J5D8_HUMAN]	1
60S ribosomal protein L12	P30050	RPL12	[RL12_HUMAN]	1
Nucleoporin NUP188 homolog	Q5SRE5	NUP188	[NU188_HUMAN]	1
V-type proton ATPase subunit d 1 (Fragment)	H3BQJ1	ATP6V0D1	[H3BQJ1_HUMAN]	1
Nucleolar RNA helicase 2	Q9NR30	DDX21	[DDX21_HUMAN]	1
Methyltransferase-like protein 13	Q8N6R0	METTL13	[MET13_HUMAN]	1	2
28S ribosomal protein S23, mitochondrial	J3QLR8	MRPS23	[J3QLR8_HUMAN]	1	2
28S ribosomal protein S27, mitochondrial	D6RJC7	MRPS27	[D6RJC7_HUMAN]	1	1
Mitochondrial import inner membrane translocase subunit TIM50 (Fragment)	M0R0C3	TIMM50	[M0R0C3_HUMAN]	1	1
Phosphatidylinositol 4-kinase alpha	P42356	PI4KA	[PI4KA_HUMAN]	1	3
Nucleosome assembly protein 1-like 1 (Fragment)	F8VRJ2	NAP1L1	[F8VRJ2_HUMAN]	1
Pentatricopeptide repeat domain-containing protein 3, mitochondrial	Q96EY7	PTCD3	[PTCD3_HUMAN]	1
Peroxisome proliferator-activated receptor delta	Q03181	PPARD	[PPARD_HUMAN]	1	1
Lactadherin (Fragment)	H0YKS8	MFGE8	[H0YKS8_HUMAN]	1
60S acidic ribosomal protein P1	P05386	RPLP1	[RLA1_HUMAN]	1
Heterogeneous nuclear ribonucleoprotein K (Fragment)	Q5T6W2	HNRNPK	[Q5T6W2_HUMAN]	1	1
Zinc transporter ZIP10	Q9ULF5	SLC39A10	[S39AA_HUMAN]	1	1
60S ribosomal protein L10a	P62906	RPL10A	[RL10A_HUMAN]	1	3
60S ribosomal protein L24	C9JXB8	RPL24	[C9JXB8_HUMAN]	1	1
Nuclear pore complex protein Nup93 (Fragment)	H3BV11	NUP93	[H3BV11_HUMAN]	1
PDZ domain-containing protein 9	Q8IXQ8	PDZD9	[PDZD9_HUMAN]	1	1
Kinesin-like protein KIF14	Q15058	KIF14	[KIF14_HUMAN]	1	76
Melanoma-associated antigen D1	Q9Y5V3	MAGED1	[MAGD1_HUMAN]	1
60S ribosomal protein L17 (Fragment)	J3KRB3	RPL17	[J3KRB3_HUMAN]	1	2
V-type proton ATPase subunit a	Q8TBM3	ATP6V0A2	[Q8TBM3_HUMAN]	1
Oral-facial-digital syndrome 1 protein	A0A0A0MS89	OFD1	[A0A0A0MS89_HUMAN]	1	1
60S ribosomal protein L3 (Fragment)	B5MCW2	RPL3	[B5MCW2_HUMAN]	1	3
Zinc finger CCHC domain-containing protein 10	B3KVL5	ZCCHC10	[B3KVL5_HUMAN]	1	1
Nuclear transcription factor Y subunit alpha	P23511	NFYA	[NFYA_HUMAN]	1
Ig kappa chain V-I region Lay	P01605	Ig kappa chain V-I region Lay OS=Homo sapiens	[KV113_HUMAN]	1	2	9
28S ribosomal protein S35, mitochondrial	P82673	MRPS35	[RT35_HUMAN]	1	2
Myeloid leukemia factor 2	Q15773	MLF2	[MLF2_HUMAN]	1
40S ribosomal protein S19 (Fragment)	M0R2L9	RPS19	[M0R2L9_HUMAN]	1
Ig gamma-1 chain C region (Fragment)	A0A0A0MS07	IGHG1	[A0A0A0MS07_HUMAN]	1
Zinc finger protein 148	Q9UQR1	ZNF148	[ZN148_HUMAN]	1	1
Host cell factor 1	P51610	HCFC1	[HCFC1_HUMAN]	1
40S ribosomal protein S14	P62263	RPS14	[RS14_HUMAN]	1
Importin subunit alpha-4	O00505	KPNA3	[IMA4_HUMAN]	1
3-ketoacyl-CoA thiolase, mitochondrial	K7EME0	ACAA2	[K7EME0_HUMAN]	1
40S ribosomal protein S13	J3KMX5	RPS13	[J3KMX5_HUMAN]	1	1
NEDD8	Q15843	NEDD8	[NEDD8_HUMAN]	1
Nestin	P48681	NES	[NEST_HUMAN]	1	1
Ig lambda chain V-I region EPS	P06888	Ig lambda chain V-I region EPS OS=Homo sapiens	[LV109_HUMAN]	1
Homeobox protein DLX-3	O60479	DLX3	[DLX3_HUMAN]	1	2
Mitogen-activated protein kinase kinase kinase kinase 4	C9J840	MAP4K4	[C9J840_HUMAN]	1
YTH domain family, member 3, isoform CRA_a	A0A024R7W5	YTHDF3	[A0A024R7W5_HUMAN]	1
Nuclear factor related to kappa-B-binding protein	Q6P4R8	NFRKB	[NFRKB_HUMAN]	1
HMG domain-containing protein 4 (Fragment)	B0QXZ8	HMGXB4	[B0QXZ8_HUMAN]	1	1
28S ribosomal protein S29, mitochondrial (Fragment)	V9GZ61	DAP3	[V9GZ61_HUMAN]	1	1
NKG2D ligand 4 (Fragment)	E9PKJ6	RAET1E	[E9PKJ6_HUMAN]	1	1
Interferon alpha/beta receptor 1	P17181	IFNAR1	[INAR1_HUMAN]	1
Heterogeneous nuclear ribonucleoprotein H3	P31942	HNRNPH3	[HNRH3_HUMAN]	1	1
28S ribosomal protein S34, mitochondrial	A0A087WUZ8	MRPS34	[A0A087WUZ8_HUMAN]	1
40S ribosomal protein S25	P62851	RPS25	[RS25_HUMAN]	1
NUAK family SNF1-like kinase 2	Q9H093	NUAK2	[NUAK2_HUMAN]	1
Homeobox protein SIX1	Q15475	SIX1	[SIX1_HUMAN]	1
Zinc finger BED domain-containing protein 4	O75132	ZBED4	[ZBED4_HUMAN]	1
Homeodomain-interacting protein kinase 2	Q9H2X6	HIPK2	[HIPK2_HUMAN]	1
MPN domain-containing protein (Fragment)	M0QXC4	MPND	[M0QXC4_HUMAN]	1
Macoilin	Q8N5G2	TMEM57	[MACOI_HUMAN]	1	3
26S proteasome non-ATPase regulatory subunit 2	Q13200	PSMD2	[PSMD2_HUMAN]	1
26S protease regulatory subunit 4	P62191	PSMC1	[PRS4_HUMAN]	1
Voltage-dependent anion-selective channel protein 1	P21796	VDAC1	[VDAC1_HUMAN]	1
Protein dpy-30 homolog	Q9C005	DPY30	[DPY30_HUMAN]	1
Protein ELYS	Q8WYP5	AHCTF1	[ELYS_HUMAN]	1	1
Protein FAM212A	Q96EL1	FAM212A	[F212A_HUMAN]	1	3
Uridine 5'-monophosphate synthase	P11172	UMPS	[UMPS_HUMAN]	1
Glutaminyl-peptide cyclotransferase-like protein	K7EQG1	QPCTL	[K7EQG1_HUMAN]	1	1
Glutamine--fructose-6-phosphate aminotransferase [isomerizing] 1	Q06210	GFPT1	[GFPT1_HUMAN]	1
Girdin	A0A087WXD9	CCDC88A	[A0A087WXD9_HUMAN]	1	1
Upstream stimulatory factor 2 (Fragment)	M0QXT0	USF2	[M0QXT0_HUMAN]	1
Protein IGKV2D-29	A0A087X0P6	IGKV2D-29	[A0A087X0P6_HUMAN]	1	3	9
General transcription factor 3C polypeptide 5 (Fragment)	Q5T7U4	GTF3C5	[Q5T7U4_HUMAN]	1
Golgi apparatus protein 1	Q92896	GLG1	[GSLG1_HUMAN]	1
Leucine-rich repeat-containing protein 53	A6NM62	LRRC53	[LRC53_HUMAN]	1
A-kinase anchor protein 17A	X6RAJ1	AKAP17A	[X6RAJ1_HUMAN]	1
Protein KIAA0100 (Fragment)	K7EQR3	KIAA0100	[K7EQR3_HUMAN]	1
G protein-regulated inducer of neurite outgrowth 3	Q6ZVF9	GPRIN3	[GRIN3_HUMAN]	1
Zinc finger protein ZIC 2	A0A087WY47	ZIC2	[A0A087WY47_HUMAN]	1	1
Lupus La protein	P05455	SSB	[LA_HUMAN]	1
General transcription factor 3C polypeptide 4	Q9UKN8	GTF3C4	[TF3C4_HUMAN]	1
Leucine-rich repeat-containing protein 59	Q96AG4	LRRC59	[LRC59_HUMAN]	1	2
Lethal(3)malignant brain tumor-like protein 2	Q969R5	L3MBTL2	[LMBL2_HUMAN]	1
Protein IGKV3D-20 (Fragment)	A0A0C4DH25	IGKV3D-20	[A0A0C4DH25_HUMAN]	1
Adenylate kinase isoenzyme 6 (Fragment)	D6RHW1	TAF9	[D6RHW1_HUMAN]	1
General transcription factor 3C polypeptide 1	Q12789	GTF3C1	[TF3C1_HUMAN]	1
General transcription factor 3C polypeptide 2 (Fragment)	C9JNH7	GTF3C2	[C9JNH7_HUMAN]	1
Protein IGKV3D-11	A0A087WUS2	IGKV3D-11	[A0A087WUS2_HUMAN]	1
Glypican-3 (Fragment)	H0Y3U6	GPC3	[H0Y3U6_HUMAN]	1
Gamma-tubulin complex component 3	Q96CW5	TUBGCP3	[GCP3_HUMAN]	1
MAX gene-associated protein (Fragment)	H3BP52	MGA	[H3BP52_HUMAN]	1
Heat shock protein beta-1	F8WE04	HSPB1	[F8WE04_HUMAN]	1
Heat shock protein 105 kDa	A0A0A0MSM0	HSPH1	[A0A0A0MSM0_HUMAN]	1
Vitronectin	P04004	VTN	[VTNC_HUMAN]	1	1
Mediator of DNA damage checkpoint protein 1 (Fragment)	A2AB05	MDC1	[A2AB05_HUMAN]	1
Pre-mRNA-processing factor 6	O94906	PRPF6	[PRP6_HUMAN]	1
Pre-mRNA-splicing factor SYF1	Q9HCS7	XAB2	[SYF1_HUMAN]	1	2
Probable E3 ubiquitin-protein ligase HERC4 (Fragment)	H0Y6K7	HERC4	[H0Y6K7_HUMAN]	1	1
Laminin subunit alpha-5	O15230	LAMA5	[LAMA5_HUMAN]	1	1
HCLS1-associated protein X-1	O00165	HAX1	[HAX1_HUMAN]	1	2
HCG1782423 (Fragment)	A0A075B6J9	IGLV2-18	[A0A075B6J9_HUMAN]	1
Potassium voltage-gated channel subfamily G member 1 (Fragment)	Q5JXL4	KCNG1	[Q5JXL4_HUMAN]	1
Helicase, lymphoid-specific, isoform CRA_d	A0A087WSW7	HELLS	[A0A087WSW7_HUMAN]	1	3
60S ribosomal protein L9 (Fragment)	E7ESE0	RPL9	[E7ESE0_HUMAN]	1
Proteasome subunit beta type-4	P28070	PSMB4	[PSB4_HUMAN]	1	1
Vacuolar protein sorting-associated protein 51 homolog	Q9UID3	VPS51	[VPS51_HUMAN]	1
Valine--tRNA ligase, mitochondrial (Fragment)	A2ABL6	VARS2	[A2ABL6_HUMAN]	1
Major vault protein	Q14764	MVP	[MVP_HUMAN]	1
MAP7 domain-containing protein 1	Q3KQU3	MAP7D1	[MA7D1_HUMAN]	1	1
Phosphoglycerate kinase 1	P00558	PGK1	[PGK1_HUMAN]	1
Guanine nucleotide-binding protein-like 3-like protein	Q9NVN8	GNL3L	[GNL3L_HUMAN]	1
Plasminogen activator inhibitor 1 RNA-binding protein	Q8NC51	SERBP1	[PAIRB_HUMAN]	1
Guanine nucleotide-binding protein subunit beta-2-like 1 (Fragment)	H0Y9P0	GNB2L1	[H0Y9P0_HUMAN]	1
60S ribosomal protein L5	P46777	RPL5	[RL5_HUMAN]	1
Actin filament-associated protein 1	Q8N556	AFAP1	[AFAP1_HUMAN]	1
Prostate tumor overexpressed gene 1, isoform CRA_i	M0QYQ4	PTOV1	[M0QYQ4_HUMAN]	1
Prohibitin (Fragment)	D6RBK0	PHB	[D6RBK0_HUMAN]	1
Meiotic recombination protein REC8 homolog	O95072	REC8	[REC8_HUMAN]	1
Vascular endothelial zinc finger 1 (Fragment)	J9JIC7	VEZF1	[J9JIC7_HUMAN]	1	2
Zinc finger protein with KRAB and SCAN domains 1	B3KRF7	ZKSCAN1	[B3KRF7_HUMAN]		2
Zinc finger MIZ domain-containing protein 2	E7EWM3	ZMIZ2	[E7EWM3_HUMAN]		1
Zinc finger protein Pegasus	Q9H5V7	IKZF5	[IKZF5_HUMAN]		1
Bleomycin hydrolase (Fragment)	K7ESE8	BLMH	[K7ESE8_HUMAN]		1
Transcription factor SOX-11	P35716	SOX11	[SOX11_HUMAN]		1
Transcription factor 4	H3BTP3	TCF4	[H3BTP3_HUMAN]		12
Transcription factor COE1	E5RFQ1	EBF1	[E5RFQ1_HUMAN]		1
Thioredoxin	P10599	TXN	[THIO_HUMAN]		3
28S ribosomal protein S31, mitochondrial	Q92665	MRPS31	[RT31_HUMAN]		1
Brain-specific angiogenesis inhibitor 1-associated protein 2	I3L3C5	BAIAP2	[I3L3C5_HUMAN]		1
Tight junction protein ZO-2	Q9UDY2	TJP2	[ZO2_HUMAN]		4
BTB/POZ domain-containing protein 17	A6NE02	BTBD17	[BTBDH_HUMAN]		2
Calmodulin-like protein 5	Q9NZT1	CALML5	[CALL5_HUMAN]		1
AP-2 complex subunit alpha-2 (Fragment)	A0A0G2JQM1	AP2A2	[A0A0G2JQM1_HUMAN]		3
60S ribosomal protein L18 (Fragment)	F8VUA6	RPL18	[F8VUA6_HUMAN]		1
60S ribosomal protein L21	G3V1B3	RPL21	[G3V1B3_HUMAN]		1
Tubulin beta chain	P07437	TUBB	[TBB5_HUMAN]		49
Tubulin beta-2A chain	Q13885	TUBB2A	[TBB2A_HUMAN]		41	16
60S ribosomal protein L38	J3KT73	RPL38	[J3KT73_HUMAN]		4
60S ribosomal protein L6 (Fragment)	F8VR69	RPL6	[F8VR69_HUMAN]		1
Vimentin (Fragment)	Q5JVS8	VIM	[Q5JVS8_HUMAN]			1
Vimentin	B0YJC4	VIM	[B0YJC4_HUMAN]		8
AP-2 complex subunit mu (Fragment)	C9JJ47	AP2M1	[C9JJ47_HUMAN]		3
Transformation/transcription domain-associated protein (Fragment)	H0Y4W2	TRRAP	[H0Y4W2_HUMAN]		15
Actin, cytoplasmic 2 (Fragment)	I3L3I0	ACTG1	[I3L3I0_HUMAN]			1
60S acidic ribosomal protein P2	P05387	RPLP2	[RLA2_HUMAN]		2
UV excision repair protein RAD23 homolog B (Fragment)	Q5W0S5	RAD23B	[Q5W0S5_HUMAN]		2
Uncharacterized protein (Fragment)	A0A0J9YX35	Uncharacterized protein (Fragment) OS=Homo sapiens	[A0A0J9YX35_HUMAN]		1	4
Annexin (Fragment)	H0YMM1	ANXA2	[H0YMM1_HUMAN]		4
Ankyrin repeat and SOCS box protein 18	Q6ZVZ8	ASB18	[ASB18_HUMAN]			3
UPF0568 protein C14orf166	Q9Y224	C14orf166	[CN166_HUMAN]		1
Alpha-internexin	Q16352	INA	[AINX_HUMAN]		5
Unconventional myosin-XVIIIb (Fragment)	H0YGQ4	MYO18B	[H0YGQ4_HUMAN]		1
DNA mismatch repair protein Msh3	P20585	MSH3	[MSH3_HUMAN]		2
Unconventional myosin-IXb (Fragment)	M0QXP0	MYO9B	[M0QXP0_HUMAN]		1
Unconventional myosin-XVI	Q9Y6X6	MYO16	[MYO16_HUMAN]			1
AP-2 complex subunit beta (Fragment)	K7EMN7	AP2B1	[K7EMN7_HUMAN]		1
Transcriptional activator protein Pur-alpha	Q00577	PURA	[PURA_HUMAN]		1
Zinc finger CCHC domain-containing protein 8	Q6NZY4	ZCCHC8	[ZCHC8_HUMAN]		2
Transcription factor SPT20 homolog	F6S7C4	SUPT20H	[F6S7C4_HUMAN]		2
40S ribosomal protein S15	P62841	RPS15	[RS15_HUMAN]		4
40S ribosomal protein S18	J3JS69	RPS18	[J3JS69_HUMAN]		1
Zinc finger CCCH domain-containing protein 18 (Fragment)	H3BRH3	ZC3H18	[H3BRH3_HUMAN]		1
Zinc finger CCCH domain-containing protein 11A	O75152	ZC3H11A	[ZC11A_HUMAN]		1
40S ribosomal protein S2 (Fragment)	H0YEN5	RPS2	[H0YEN5_HUMAN]		4
40S ribosomal protein S23	P62266	RPS23	[RS23_HUMAN]		1
Bcl-2-associated transcription factor 1	Q9NYF8	BCLAF1	[BCLF1_HUMAN]		31
40S ribosomal protein S26	P62854	RPS26	[RS26_HUMAN]		1
60S ribosomal protein L10 (Fragment)	X1WI28	RPL10	[X1WI28_HUMAN]		2
YTH domain-containing family protein 2	A0A087WXZ3	YTHDF2	[A0A087WXZ3_HUMAN]		2
Translational activator GCN1	Q92616	GCN1L1	[GCN1L_HUMAN]		1
Transcriptional activator protein Pur-beta	Q96QR8	PURB	[PURB_HUMAN]		1
40S ribosomal protein S3a (Fragment)	D6RGE0	RPS3A	[D6RGE0_HUMAN]		4
XIAP-associated factor 1	Q6GPH4	XAF1	[XAF1_HUMAN]		1
WSC domain-containing protein 1	I3L3E6	WSCD1	[I3L3E6_HUMAN]			1
V-type proton ATPase subunit d 1 (Fragment)	J3QL14	ATP6V0D1	[J3QL14_HUMAN]		1
Unconventional myosin-Ib (Fragment)	C9K0I9	MYO1B	[C9K0I9_HUMAN]		1
Transformer-2 protein homolog alpha	Q13595	TRA2A	[TRA2A_HUMAN]		1
A-kinase anchor protein 8-like	Q9ULX6	AKAP8L	[AKP8L_HUMAN]		1
Transformer-2 protein homolog beta	P62995	TRA2B	[TRA2B_HUMAN]		3
Bifunctional polynucleotide phosphatase/kinase	Q96T60	PNKP	[PNKP_HUMAN]		15
B-cell lymphoma/leukemia 11B	D3YTK1	BCL11B	[D3YTK1_HUMAN]		19
Heterogeneous nuclear ribonucleoprotein U-like protein 1 (Fragment)	M0QYM5	HNRNPUL1	[M0QYM5_HUMAN]			1
Histone H1t	P22492	HIST1H1T	[H1T_HUMAN]		1
Polyadenylate-binding protein 2 (Fragment)	H0YJH9	PABPN1	[H0YJH9_HUMAN]		1
PLEKHG4B protein (Fragment)	Q96HN1	PLEKHG4B	[Q96HN1_HUMAN]		1
Phosphoacetylglucosamine mutase	A0A087WT27	PGM3	[A0A087WT27_HUMAN]		1
Heterogeneous nuclear ribonucleoprotein H (Fragment)	E5RGH4	HNRNPH1	[E5RGH4_HUMAN]			1
Heterogeneous nuclear ribonucleoprotein L (Fragment)	M0QXS5	HNRNPL	[M0QXS5_HUMAN]		5
Pericentriolar material 1 protein (Fragment)	H0YBA1	PCM1	[H0YBA1_HUMAN]		2
Heat shock 70 kDa protein 4	A0A087WTS8	HSPA4	[A0A087WTS8_HUMAN]		1
Ovochymase-1	Q7RTY7	OVCH1	[OVCH1_HUMAN]		2
Probable global transcription activator SNF2L1	P28370	SMARCA1	[SMCA1_HUMAN]		22
Heterogeneous nuclear ribonucleoprotein U-like protein 1 (Fragment)	M0R3F1	HNRNPUL1	[M0R3F1_HUMAN]		4
Heterogeneous nuclear ribonucleoproteins C1/C2	B2R5W2	HNRNPC	[B2R5W2_HUMAN]		19
High mobility group protein 20A	Q9NP66	HMG20A	[HM20A_HUMAN]		2
One cut domain family member 2	O95948	ONECUT2	[ONEC2_HUMAN]		2
OCIA domain-containing protein 2	Q56VL3	OCIAD2	[OCAD2_HUMAN]		1
Histidine ammonia-lyase	P42357	HAL	[HUTH_HUMAN]		4
Protein PAXX	Q9BUH6	C9orf142	[PAXX_HUMAN]		1
Oxysterol-binding protein (Fragment)	F8VUA7	OSBPL8	[F8VUA7_HUMAN]		3
Protein FAM98A	E9PH82	FAM98A	[E9PH82_HUMAN]		1
DNA mismatch repair protein Msh2	P43246	MSH2	[MSH2_HUMAN]		2
Protein mab-21-like 1	Q13394	MAB21L1	[MB211_HUMAN]		1
Flotillin-2 (Fragment)	K7EKW9	FLOT2	[K7EKW9_HUMAN]		1
Protein IGKV6D-21 (Fragment)	A0A0A0MT36	IGKV6D-21	[A0A0A0MT36_HUMAN]			1
Gap junction gamma-1 protein	P36383	GJC1	[CXG1_HUMAN]		8
Gasdermin-A (Fragment)	J3KRG2	GSDMA	[J3KRG2_HUMAN]		1
Protein IGKV3D-15 (Fragment)	A0A087WSY6	IGKV3D-15	[A0A087WSY6_HUMAN]		1
Pre-mRNA-processing factor 39	Q86UA1	PRPF39	[PRP39_HUMAN]		2
Protein IGHV3-53 (Fragment)	A0A087WSX4	IGHV3-53	[A0A087WSX4_HUMAN]			1
Nucleolar protein 56	O00567	NOP56	[NOP56_HUMAN]		1
Protein CASP	Q13948	CUX1	[CASP_HUMAN]		17
Golgin subfamily A member 3	Q08378	GOLGA3	[GOGA3_HUMAN]		33
GPNMB protein	Q96F58	GPNMB	[Q96F58_HUMAN]		1
GRB2-associated-binding protein 2	Q9UQC2	GAB2	[GAB2_HUMAN]			1
GTP-binding nuclear protein Ran (Fragment)	H0YFC6	RAN	[H0YFC6_HUMAN]		1
Probable maltase-glucoamylase 2	Q2M2H8	MGAM2	[MGAL_HUMAN]		1
Guanine nucleotide-binding protein subunit beta-4 (Fragment)	C9JD14	GNB4	[C9JD14_HUMAN]		3
General transcription factor 3C polypeptide 3 (Fragment)	H7C0C0	GTF3C3	[H7C0C0_HUMAN]		1
Junction plakoglobin	P14923	JUP	[PLAK_HUMAN]		6
Obscurin	Q5VST9	OBSCN	[OBSCN_HUMAN]		1
NEDD8	F8VSA6	NEDD8	[F8VSA6_HUMAN]		1
N-acetyltransferase ESCO2 (Fragment)	H0YB88	ESCO2	[H0YB88_HUMAN]		1
Myeloid-associated differentiation marker (Fragment)	C9JJV6	MYADM	[C9JJV6_HUMAN]		1
Integrator complex subunit 7 (Fragment)	A0A087WXK3	INTS7	[A0A087WXK3_HUMAN]		2
Myelin transcription factor 1	Q01538	MYT1	[MYT1_HUMAN]		1
Interferon-inducible double-stranded RNA-dependent protein kinase activator A	F8WEG8	PRKRA	[F8WEG8_HUMAN]		1
Importin subunit alpha-4 (Fragment)	H0Y4S9	KPNA3	[H0Y4S9_HUMAN]		1
Jerky protein homolog-like	Q9Y4A0	JRKL	[JERKL_HUMAN]		1
Neuronal pentraxin-2	P47972	NPTX2	[NPTX2_HUMAN]		7
Keratinocyte proline-rich protein	Q5T749	KPRP	[KPRP_HUMAN]		2
KH domain-containing, RNA-binding, signal transduction-associated protein 1	Q07666	KHDRBS1	[KHDR1_HUMAN]		1
Kinesin-like protein KIF27	Q86VH2	KIF27	[KIF27_HUMAN]		10
La-related protein 1 (Fragment)	H0YC33	LARP1	[H0YC33_HUMAN]		1
Magnesium transporter protein 1	Q9H0U3	MAGT1	[MAGT1_HUMAN]		1
Lysine-specific demethylase 2B	Q8NHM5	KDM2B	[KDM2B_HUMAN]		3
L-lactate dehydrogenase B chain	P07195	LDHB	[LDHB_HUMAN]		1
Mitogen-activated protein kinase kinase kinase kinase 4	E7ENQ1	MAP4K4	[E7ENQ1_HUMAN]		3
Ig heavy chain V-III region GAR	P80419	Ig heavy chain V-III region GAR OS=Homo sapiens	[HV322_HUMAN]			1
Histone H3.1	P68431	HIST1H3A	[H31_HUMAN]		4
Nuclear pore complex protein Nup93	Q8N1F7	NUP93	[NUP93_HUMAN]		2
Nuclear pore complex protein Nup205 (Fragment)	U3KPX2	NUP205	[U3KPX2_HUMAN]		2
Nuclear factor-related to kappa-B-binding protein (Fragment)	E9PQ59	NFRKB	[E9PQ59_HUMAN]		1
Histone-lysine N-methyltransferase EHMT2 (Fragment)	A0A0G2JRR0	EHMT2	[A0A0G2JRR0_HUMAN]		3
Nuclear factor erythroid 2-related factor 1	J9JIE5	NFE2L1	[J9JIE5_HUMAN]		3
Homeobox protein DLX-5	P56178	DLX5	[DLX5_HUMAN]		2
Neuronal pentraxin-1	Q15818	NPTX1	[NPTX1_HUMAN]		5
NK-tumor recognition protein	A0A087WYW3	NKTR	[A0A087WYW3_HUMAN]		1
Filaggrin-2	Q5D862	FLG2	[FILA2_HUMAN]		8
Ig kappa chain V-III region NG9 (Fragment)	P01621	Ig kappa chain V-III region NG9 (Fragment) OS=Homo sapiens	[KV303_HUMAN]			1
Ig kappa chain V-III region SIE	P01620	Ig kappa chain V-III region SIE OS=Homo sapiens	[KV302_HUMAN]			1
Ig kappa chain V-IV region Len	P01625	Ig kappa chain V-IV region Len OS=Homo sapiens	[KV402_HUMAN]		58	3
Ig lambda chain V-I region VOR	P01699	Ig lambda chain V-I region VOR OS=Homo sapiens	[LV101_HUMAN]		1
NKAP-like protein	Q5M9Q1	NKAPL	[NKAPL_HUMAN]		1
Immunoglobulin lambda-like polypeptide 5	A0A087WYR4	IGLL5	[A0A087WYR4_HUMAN]		2
Nipped-B-like protein	Q6KC79	NIPBL	[NIPBL_HUMAN]		1
Homeobox protein DLX-6	G3V471	DLX6	[G3V471_HUMAN]		2
Dermcidin	P81605	DCD	[DCD_HUMAN]		3
Inactive polypeptide N-acetylgalactosaminyltransferase-like protein 5	Q7Z4T8	GALNTL5	[GLTL5_HUMAN]		1
Sodium/potassium-transporting ATPase subunit alpha-1 (Fragment)	Q5TC02	ATP1A1	[Q5TC02_HUMAN]		1
Corneodesmosin	G8JLG2	CDSN	[G8JLG2_HUMAN]		1
Single-stranded DNA-binding protein 4	Q9BWG4	SSBP4	[SSBP4_HUMAN]		2
Cyclic AMP-responsive element-binding protein 1	P16220	CREB1	[CREB1_HUMAN]		4
Cystatin-A	C9J0E4	CSTA	[C9J0E4_HUMAN]		1
Serum albumin	A0A0C4DGB6	ALB	[A0A0C4DGB6_HUMAN]		24
Sterile alpha motif domain-containing protein 11 (Fragment)	H7C3J6	SAMD11	[H7C3J6_HUMAN]		1
Serum albumin	A0A087WWT3	ALB	[A0A087WWT3_HUMAN]			8
Complement C1q subcomponent subunit B (Fragment)	A0A0A0MSV6	C1QB	[A0A0A0MSV6_HUMAN]		1
Desmocollin-1	Q08554	DSC1	[DSC1_HUMAN]		2
Desmoglein-1	Q02413	DSG1	[DSG1_HUMAN]		2
Desmoplakin	P15924	DSP	[DESP_HUMAN]		19
Serpin B12	Q96P63	SERPINB12	[SPB12_HUMAN]		1
Dimethyladenosine transferase 2, mitochondrial	Q9H5Q4	TFB2M	[TFB2M_HUMAN]		1
Disks large homolog 5 (Fragment)	A0A0J9YYG8	DLG5	[A0A0J9YYG8_HUMAN]		1
Protein max	G3V5L1	MAX	[G3V5L1_HUMAN]		7
Cytoplasmic FMR1-interacting protein 1 (Fragment)	A0A0G2JR96	CYFIP1	[A0A0G2JR96_HUMAN]		2
Charged multivesicular body protein 2b (Fragment)	A0A087WW88	CHMP2B	[A0A087WW88_HUMAN]		1
Caspase-14	P31944	CASP14	[CASPE_HUMAN]		6
Cat eye syndrome critical region protein 2	B7WPH3	CECR2	[B7WPH3_HUMAN]		1
Catalase	P04040	CAT	[CATA_HUMAN]		4
CCAAT/enhancer-binding protein beta	P17676	CEBPB	[CEBPB_HUMAN]		1
Cell division cycle 5-like protein	Q99459	CDC5L	[CDC5L_HUMAN]		1
T-complex protein 1 subunit eta	Q99832	CCT7	[TCPH_HUMAN]		1
T-cell leukemia homeobox protein 2	O43763	TLX2	[TLX2_HUMAN]		1
Complement component 1 Q subcomponent-binding protein, mitochondrial (Fragment)	I3L3Q7	C1QBP	[I3L3Q7_HUMAN]		1
Charged multivesicular body protein 2a	O43633	CHMP2A	[CHM2A_HUMAN]		2
Serine protease 58	Q8IYP2	PRSS58	[PRS58_HUMAN]		2
Taste receptor type 2 member 40	P59535	TAS2R40	[T2R40_HUMAN]		1
Chloride transport protein 6	P51797	CLCN6	[CLCN6_HUMAN]		1
Chromobox protein homolog 1	K7ELA4	CBX1	[K7ELA4_HUMAN]		2
Chromobox protein homolog 5 (Fragment)	F8VNY3	CBX5	[F8VNY3_HUMAN]		1
SWI/SNF-related matrix-associated actin-dependent regulator of chromatin subfamily A-like protein 1	Q9NZC9	SMARCAL1	[SMAL1_HUMAN]		10
SUN domain-containing protein 1	O94901	SUN1	[SUN1_HUMAN]		5
Structural maintenance of chromosomes protein	G8JLG1	SMC1A	[G8JLG1_HUMAN]		2
Charged multivesicular body protein 1a	F5H875	CHMP1A	[F5H875_HUMAN]		1
Extracellular matrix protein 1	Q16610	ECM1	[ECM1_HUMAN]		1
Serine/threonine-protein phosphatase 2A regulatory subunit B'' subunit alpha	Q06190	PPP2R3A	[P2R3A_HUMAN]		1
Elongation factor 1-alpha 1	A0A087WVQ9	EEF1A1	[A0A087WVQ9_HUMAN]			1
Rab11 family-interacting protein 2	Q7L804	RAB11FIP2	[RFIP2_HUMAN]		1
Protocadherin gamma-A5	Q9Y5G8	PCDHGA5	[PCDG5_HUMAN]			1
EMILIN-1	A0A0C4DFX3	EMILIN1	[A0A0C4DFX3_HUMAN]		5
Erythroid differentiation-related factor 1	Q3B7T1	EDRF1	[EDRF1_HUMAN]		1
Protein-glutamine gamma-glutamyltransferase K	P22735	TGM1	[TGM1_HUMAN]		1
ELAV-like protein 2	Q12926	ELAVL2	[ELAV2_HUMAN]		3
Exocyst complex component 4	Q96A65	EXOC4	[EXOC4_HUMAN]		1
ELAV-like protein 1	Q15717	ELAVL1	[ELAV1_HUMAN]		1
Protein THEM6 (Fragment)	H0YAR9	THEM6	[H0YAR9_HUMAN]		1
Protein SOGA1	X6R3R3	SOGA1	[X6R3R3_HUMAN]		1
Fanconi anemia core complex-associated protein 24	Q9BTP7	FAAP24	[FAP24_HUMAN]		1
Fatty aldehyde dehydrogenase (Fragment)	J3QS00	ALDH3A2	[J3QS00_HUMAN]		1
F-box only protein 11 (Fragment)	C9IYF0	FBXO11	[C9IYF0_HUMAN]		1
Protein PRRC2A	P48634	PRRC2A	[PRC2A_HUMAN]		1
Filaggrin	P20930	FLG	[FILA_HUMAN]		3
Protein-glutamine gamma-glutamyltransferase E	Q08188	TGM3	[TGM3_HUMAN]		3
DnaJ homolog subfamily B member 6 (Fragment)	C9J2C4	DNAJB6	[C9J2C4_HUMAN]		2
SAGA-associated factor 29 homolog	H3BPL5	SGF29	[H3BPL5_HUMAN]		1
RNA-binding protein Musashi homolog 1 (Fragment)	H0YHB7	MSI1	[H0YHB7_HUMAN]		1
RNA-binding protein fox-1 homolog 2 (Fragment)	B0QYY6	RBFOX2	[B0QYY6_HUMAN]		1
RNA-binding protein EWS (Fragment)	H7BY36	EWSR1	[H7BY36_HUMAN]		2
RNA-binding protein 14	Q96PK6	RBM14	[RBM14_HUMAN]		1
RNA/RNP complex-1-interacting phosphatase	O75319	DUSP11	[DUS11_HUMAN]		1
DNA-directed RNA polymerase, mitochondrial	O00411	POLRMT	[RPOM_HUMAN]		1
ELAV-like protein 3	Q14576	ELAVL3	[ELAV3_HUMAN]		4
DnaJ homolog subfamily B member 11 (Fragment)	H7C2Y5	DNAJB11	[H7C2Y5_HUMAN]		1	1
Cancer-related nucleoside-triphosphatase	Q9BSD7	NTPCR	[NTPCR_HUMAN]		1
DnaJ homolog subfamily C member 11	Q9NVH1	DNAJC11	[DJC11_HUMAN]		1
Double-stranded RNA-specific adenosine deaminase (Fragment)	H0YCK3	ADAR	[H0YCK3_HUMAN]		1
Regulator of nonsense transcripts 1	Q92900	UPF1	[RENT1_HUMAN]		1
E3 ubiquitin-protein ligase DTX1	Q86Y01	DTX1	[DTX1_HUMAN]		1
E3 ubiquitin-protein ligase KCMF1	Q9P0J7	KCMF1	[KCMF1_HUMAN]		1
E3 ubiquitin-protein ligase MYCBP2 (Fragment)	H7C3U4	MYCBP2	[H7C3U4_HUMAN]			1
Ras-responsive element-binding protein 1	Q92766	RREB1	[RREB1_HUMAN]		2
Ribosomal protein L19	J3QR09	RPL19	[J3QR09_HUMAN]		1

## Sheet: MYCN>2 peptide counts
Gene	reference	ab1.count	ab2.count
MYCN	[MYCN_HUMAN]	197	180
XRCC5	[XRCC5_HUMAN]	195	143
PARP1	[PARP1_HUMAN]	175	160
HERC2	[HERC2_HUMAN]	174	284
XRCC6	[XRCC6_HUMAN]	165	173
LIG3	[DNLI3_HUMAN]	129	102
TMPO	[LAP2B_HUMAN]	118	127
TOP2B	[TOP2B_HUMAN]	107	106
RPA1	[RFA1_HUMAN]	105	191
TOP2A	[TOP2A_HUMAN]	104	101
ZFHX4	[E7EVZ1_HUMAN]	101	101
PRKDC	[PRKDC_HUMAN]	98	126
SUPT16H	[SP16H_HUMAN]	93	86
EMD	[EMD_HUMAN]	89	96
SMARCA5	[SMCA5_HUMAN]	89	73
LEMD2	[LEMD2_HUMAN]	83	96
HSPA8	[HSP7C_HUMAN]	79	72
CABIN1	[CABIN_HUMAN]	62	47
LACTB	[LACTB_HUMAN]	60	24
FBXW7	[FBXW7_HUMAN]	54	55
TOP3A	[TOP3A_HUMAN]	53	58
BLM	[BLM_HUMAN]	52	82
TUBA1A	[TBA1A_HUMAN]	52	40
TUBB3	[TBB3_HUMAN]	46	26
CHD1L	[CHD1L_HUMAN]	44	37
CUX1	[CUX1_HUMAN]	44	41
SSRP1	[SSRP1_HUMAN]	44	45
RFC1	[RFC1_HUMAN]	42	43
CHD7	[CHD7_HUMAN]	41	33
CEP170	[CE170_HUMAN]	39	36
HMBOX1	[E5RGZ2_HUMAN]	39	34
HSPA5	[GRP78_HUMAN]	37	38
TCF12	[HTF4_HUMAN]	37	44
ZFHX3	[ZFHX3_HUMAN]	37	37
UBN1	[UBN1_HUMAN]	35	27
XRCC1	[XRCC1_HUMAN]	35	26
WRN	[WRN_HUMAN]	34	34
HIRA	[HIRA_HUMAN]	33	29
PHOX2B	[PHX2B_HUMAN]	33	37
BPTF	[E7ETD6_HUMAN]	32	34
UBTF	[E9PKP7_HUMAN]	31	32
HIST1H4A	[H4_HUMAN]	30	42
SSBP1	[SSBP_HUMAN]	29	63
PARP2	[G3V167_HUMAN]	28	18
SREBF2	[SRBP2_HUMAN]	28	22
ACTB	[ACTB_HUMAN]	26	18
BAZ1A	[BAZ1A_HUMAN]	25	18
MYCBP2	[MYCB2_HUMAN]	25	41
BAZ1B	[BAZ1B_HUMAN]	24	28
BAZ2A	[J3KPG5_HUMAN]	24	26
PRPH	[PERI_HUMAN]	24	19
GPC2	[GPC2_HUMAN]	23	25
RSF1	[RSF1_HUMAN]	23	27
RPA2	[RFA2_HUMAN]	22	108
SPTAN1	[A0A0D9SF54_HUMAN]	22	11
TOP1	[TOP1_HUMAN]	22	22
CHD4	[F5GWX5_HUMAN]	21	25
HADHA	[ECHA_HUMAN]	21	28
HSPA1A	[HS71A_HUMAN]	21	21
ATP5A1	[ATPA_HUMAN]	20	8
HIST1H2AH	[H2A1H_HUMAN]	20	16
RMI1	[RMI1_HUMAN]	20	24
SLC25A6	[ADT3_HUMAN]	20	20
UBN2	[UBN2_HUMAN]	20	12
HIST1H2BJ	[H2B1J_HUMAN]	19	10
HLTF	[A0A0C4DGA6_HUMAN]	19	25
PGAM5	[PGAM5_HUMAN]	19	22
ACTC1	[ACTC_HUMAN]	18	10
HIST1H2BK	[H2B1K_HUMAN]	18	11
MAX	[MAX_HUMAN]	18	7
MCM7	[MCM7_HUMAN]	18	11
RPS3	[RS3_HUMAN]	18	13
CENPF	[CENPF_HUMAN]	17	22
HADHB	[ECHB_HUMAN]	17	8
FANCM	[FANCM_HUMAN]	16	31
RBBP4	[RBBP4_HUMAN]	16	13
SLC25A5	[ADT2_HUMAN]	16	19
SUN2	[SUN2_HUMAN]	16	11
TIMELESS	[TIM_HUMAN]	16	22
VIM	[VIME_HUMAN]	16	8
VRK3	[VRK3_HUMAN]	16	18
ZNF451	[E9PH99_HUMAN]	16	12
ATAD3A	[ATD3A_HUMAN]	15	10
HSP90AA1	[HS90A_HUMAN]	15	12
NEURL4	[I3L100_HUMAN]	15	20
PSMD3	[PSMD3_HUMAN]	15	15
TDP1	[TYDP1_HUMAN]	15	18
UBC	[F5H265_HUMAN]	15	13
ALX1	[ALX1_HUMAN]	14	13
BCL11B	[BC11B_HUMAN]	14	19
DDB1	[DDB1_HUMAN]	14	10
DYNC1H1	[DYHC1_HUMAN]	14	14
GNAO1	[GNAO_HUMAN]	14	8
GPC1	[GPC1_HUMAN]	14	17
H2AFY	[H2AY_HUMAN]	14	17
MAP1B	[MAP1B_HUMAN]	14	15
RFC5	[RFC5_HUMAN]	14	14
SNRNP200	[U520_HUMAN]	14	17
TRRAP	[F2Z2U4_HUMAN]	14	15
ZNF281	[ZN281_HUMAN]	14	13
BCOR	[BCOR_HUMAN]	13	4
DECR1	[DECR_HUMAN]	13	7
RCN2	[RCN2_HUMAN]	13	9
RFC3	[RFC3_HUMAN]	13	11
SATB1	[SATB1_HUMAN]	13	9
IGF2BP1	[IF2B1_HUMAN]	12	13
LMNB1	[LMNB1_HUMAN]	12	18
PEO1	[PEO1_HUMAN]	12	15
RFC4	[RFC4_HUMAN]	12	7
SDC2	[E7ESK6_HUMAN]	12	9
APTX	[APTX_HUMAN]	11	11
BCL11A	[BC11A_HUMAN]	11	11
DDX41	[DDX41_HUMAN]	11	11
HNRNPC	[G3V576_HUMAN]	11	19
HSPA9	[GRP75_HUMAN]	11	8
LRPPRC	[LPPRC_HUMAN]	11	9
MSH6	[MSH6_HUMAN]	11	7
TONSL	[TONSL_HUMAN]	11	15
ZFHX2	[ZFHX2_HUMAN]	11	8
BCLAF1	[E9PK09_HUMAN]	10	31
EEF1A1	[EF1A1_HUMAN]	10	14
EGFLAM	[EGFLA_HUMAN]	10	9
OSBPL8	[OSBL8_HUMAN]	10	3
PROX1	[PROX1_HUMAN]	10	9
SDC1	[SDC1_HUMAN]	10	9
TCF4	[H3BPJ7_HUMAN]	10	12
AGRN	[A0A087X208_HUMAN]	9	10
DDX1	[A0A087X2G1_HUMAN]	9	6
GNAI3	[GNAI3_HUMAN]	9	5
LMNA	[LMNA_HUMAN]	9	10
LMNB2	[LMNB2_HUMAN]	9	9
NUMA1	[NUMA1_HUMAN]	9	11
PHB2	[F5GY37_HUMAN]	9	6
PNN	[PININ_HUMAN]	9	14
RFC2	[RFC2_HUMAN]	9	8
SLC25A13	[CMC2_HUMAN]	9	3
SMARCA4	[SMCA4_HUMAN]	9	2
SPTBN1	[SPTB2_HUMAN]	9	3
TFAM	[TFAM_HUMAN]	9	16
WIZ	[B9EGQ5_HUMAN]	9	6
ZNF462	[ZN462_HUMAN]	9	10
BAZ2B	[BAZ2B_HUMAN]	8	6
CLTC	[CLH1_HUMAN]	8	2
ETAA1	[ETAA1_HUMAN]	8	13
GATAD2B	[P66B_HUMAN]	8	7
GNAI2	[GNAI2_HUMAN]	8	5
HNRNPU	[HNRPU_HUMAN]	8	11
KEAP1	[KEAP1_HUMAN]	8	10
RPL4	[RL4_HUMAN]	8	8
TAF6L	[TAF6L_HUMAN]	8	3
TCF20	[TCF20_HUMAN]	8	8
DNAJA1	[DNJA1_HUMAN]	7	2
EHMT2	[A0A0G2JIS2_HUMAN]	7	3
EIF4A3	[IF4A3_HUMAN]	7	9
H2AFY2	[H2AW_HUMAN]	7	9
HACD3	[HACD3_HUMAN]	7	7
HNRNPA2B1	[ROA2_HUMAN]	7	7
Ig lambda chain V-III region LOI OS=Homo sapiens	[LV302_HUMAN]	7	2
INTS6	[INT6_HUMAN]	7	4
MTA2	[MTA2_HUMAN]	7	8
NCL	[NUCL_HUMAN]	7	5
PABPC1	[A0A087WTT1_HUMAN]	7	12
RPS15	[K7EJ78_HUMAN]	7	4
TBX2	[TBX2_HUMAN]	7	3
ARHGEF2	[ARHG2_HUMAN]	6	10
ATP2A2	[AT2A2_HUMAN]	6	5
ATP5C1	[ATPG_HUMAN]	6	7
BANF1	[BAF_HUMAN]	6	21
CEP112	[F5GYE8_HUMAN]	6	3
COL18A1	[COIA1_HUMAN]	6	4
CUL1	[A0A0C4DGX4_HUMAN]	6	6
DRAP1	[E9PNC7_HUMAN]	6	5
EFTUD2	[U5S1_HUMAN]	6	8
EHMT1	[EHMT1_HUMAN]	6	6
FARSA	[SYFA_HUMAN]	6	5
HIST1H2AA	[H2A1A_HUMAN]	6	8
HNRNPH1	[E9PCY7_HUMAN]	6	6
HNRNPUL1	[A0A0A0MRA5_HUMAN]	6	4
HSPG2	[PGBM_HUMAN]	6	7
IMMT	[H7C463_HUMAN]	6	5
INA	[A0A087WYG8_HUMAN]	6	5
INCENP	[INCE_HUMAN]	6	3
KAT2A	[KAT2A_HUMAN]	6	2
LDB1	[LDB1_HUMAN]	6	6
MECP2	[MECP2_HUMAN]	6	4
MSANTD4	[MSD4_HUMAN]	6	8
MTA1	[E7ESY4_HUMAN]	6	10
PHF14	[PHF14_HUMAN]	6	6
PRORY	[PRORY_HUMAN]	6	4
SKP1	[E5RJR5_HUMAN]	6	5
SLC16A1	[MOT1_HUMAN]	6	3
SLC25A12	[CMC1_HUMAN]	6	3
SLC25A3	[F8VVM2_HUMAN]	6	10
SREBF1	[B5MD58_HUMAN]	6	4
THRAP3	[TR150_HUMAN]	6	11
ZNF292	[J3KNV1_HUMAN]	6	8
AP2A2	[AP2A2_HUMAN]	5	3
AP2B1	[A0A087X253_HUMAN]	5	3
AURKB	[AURKB_HUMAN]	5	5
CALU	[CALU_HUMAN]	5	3
DDX39A	[DX39A_HUMAN]	5	4
GFRA2	[E5RGR6_HUMAN]	5	2
GNAS	[GNAS2_HUMAN]	5	3
GTF2I	[GTF2I_HUMAN]	5	2
HDAC2	[HDAC2_HUMAN]	5	8
HNRNPA1	[F8W6I7_HUMAN]	5	4
HNRNPF	[HNRPF_HUMAN]	5	7
HNRNPM	[A0A087X0X3_HUMAN]	5	10
IGF2BP3	[IF2B3_HUMAN]	5	6
IMPDH2	[H0Y4R1_HUMAN]	5	2
KMT2A	[KMT2A_HUMAN]	5	3
MSANTD3-TMEFF1	[A0A0A6YYJ0_HUMAN]	5	5
NEUROD1	[NDF1_HUMAN]	5	3
PFKP	[PFKAP_HUMAN]	5	3
PHIP	[PHIP_HUMAN]	5	6
PNKP	[M0R3C8_HUMAN]	5	15
PNPLA6	[PLPL6_HUMAN]	5	5
RIF1	[RIF1_HUMAN]	5	6
RPA3	[B5MC59_HUMAN]	5	9
RPS2	[E9PMM9_HUMAN]	5	4
RPS3A	[H0Y8L7_HUMAN]	5	4
RPS4X	[RS4X_HUMAN]	5	4
SKIV2L2	[SK2L2_HUMAN]	5	9
SLC30A7	[ZNT7_HUMAN]	5	4
SUPT7L	[ST65G_HUMAN]	5	2
SYNE2	[G3V5X4_HUMAN]	5	5
TECR	[TECR_HUMAN]	5	2
TRIM28	[TIF1B_HUMAN]	5	6
TTF2	[TTF2_HUMAN]	5	2
USP11	[G5E9A6_HUMAN]	5	4
BASP1	[BASP1_HUMAN]	4	3
CCT3	[B4DUR8_HUMAN]	4	3
CEP97	[E9PG22_HUMAN]	4	3
CHD1	[CHD1_HUMAN]	4	6
CHMP4B	[CHM4B_HUMAN]	4	4
CNTN2	[CNTN2_HUMAN]	4	2
DDX5	[J3KTA4_HUMAN]	4	9
DHX9	[DHX9_HUMAN]	4	8
DNMT3A	[A0A0C4DG02_HUMAN]	4	2
EIF4A1	[IF4A1_HUMAN]	4	3
FLOT1	[FLOT1_HUMAN]	4	2
GATAD2A	[P66A_HUMAN]	4	4
GPC6	[GPC6_HUMAN]	4	6
HDX	[HDX_HUMAN]	4	5
ILF2	[B4DY09_HUMAN]	4	4
ILF3	[ILF3_HUMAN]	4	5
MMS22L	[E2QRD4_HUMAN]	4	5
PFKM	[PFKAM_HUMAN]	4	4
POLB	[E7EW18_HUMAN]	4	6
RAD23B	[RD23B_HUMAN]	4	2
RBFA	[RBFA_HUMAN]	4	2
RPLP0	[F8VPE8_HUMAN]	4	2
RPS8	[Q5JR95_HUMAN]	4	3
SLC25A11	[I3L1P8_HUMAN]	4	4
SUN1	[H0Y6N5_HUMAN]	4	5
TBP	[Q32MN6_HUMAN]	4	5
TWIST1	[H7BY00_HUMAN]	4	3
ZKSCAN1	[ZKSC1_HUMAN]	4	2
ZNF608	[ZN608_HUMAN]	4	3
ZNF644	[ZN644_HUMAN]	4	6
ABCD3	[ABCD3_HUMAN]	3	3
AGK	[E9PG39_HUMAN]	3	2
APLF	[APLF_HUMAN]	3	3
CASZ1	[CASZ1_HUMAN]	3	2
CBX1	[B5MD17_HUMAN]	3	2
COPB1	[COPB_HUMAN]	3	5
CSNK2A1	[E7EU96_HUMAN]	3	2
CSNK2A2	[CSK22_HUMAN]	3	2
DHX30	[H7BXY3_HUMAN]	3	6
DNAJB6	[DNJB6_HUMAN]	3	2
DNAJC9	[DNJC9_HUMAN]	3	5
ECH1	[ECH1_HUMAN]	3	5
GAPDH	[E7EUT5_HUMAN]	3	3
GATA3	[GATA3_HUMAN]	3	3
HAND1	[HAND1_HUMAN]	3	2
HAND2	[A0A087WT70_HUMAN]	3	5
HMG20A	[H0YKL0_HUMAN]	3	2
HNRNPA3	[ROA3_HUMAN]	3	4
INTS7	[INT7_HUMAN]	3	2
IPO9	[IPO9_HUMAN]	3	2
JPH1	[JPH1_HUMAN]	3	7
KDM1A	[KDM1A_HUMAN]	3	3
MATR3	[D6REM6_HUMAN]	3	4
MRPS9	[RT09_HUMAN]	3	2
NDUFA9	[NDUA9_HUMAN]	3	4
NHLH2	[A6PVY9_HUMAN]	3	2
NUP107	[NU107_HUMAN]	3	3
PDS5B	[PDS5B_HUMAN]	3	3
PRPF8	[PRP8_HUMAN]	3	7
PYGB	[PYGB_HUMAN]	3	2
RAD52	[RAD52_HUMAN]	3	6
RBMX	[H0Y6E7_HUMAN]	3	7
RPL15	[E7EQV9_HUMAN]	3	2
RPL7	[RL7_HUMAN]	3	5
RPL8	[E9PKZ0_HUMAN]	3	3
SMARCAL1	[H7BYI2_HUMAN]	3	10
SSBP3	[A0A087WVT6_HUMAN]	3	4
TCF3	[TFE2_HUMAN]	3	2
TOR1AIP1	[A0A0A0MSK5_HUMAN]	3	2
TUFM	[EFTU_HUMAN]	3	3
ZNF219	[ZN219_HUMAN]	3	3
ZNF384	[ZN384_HUMAN]	3	3
ZNF90	[A0A087WZ27_HUMAN]	3	2
BAG2	[BAG2_HUMAN]	2	2
BEND3	[BEND3_HUMAN]	2	2
C17orf80	[I3L072_HUMAN]	2	6
C5orf24	[CE024_HUMAN]	2	4
CCP110	[CP110_HUMAN]	2	4
CKAP2	[CKAP2_HUMAN]	2	2
CREB1	[C9J4L5_HUMAN]	2	4
DIMT1	[D6RCL3_HUMAN]	2	3
ELAVL2	[C9JB16_HUMAN]	2	3
HIST1H1B	[H15_HUMAN]	2	2
HIST2H3A	[H32_HUMAN]	2	5
HNRNPL	[M0QYL7_HUMAN]	2	5
ISL1	[D6RBJ1_HUMAN]	2	2
KDM2B	[S4R3G4_HUMAN]	2	3
KPNB1	[IMB1_HUMAN]	2	3
MBD3	[MBD3_HUMAN]	2	2
MRPS7	[J3QKW2_HUMAN]	2	3
MSH2	[V9H019_HUMAN]	2	2
NBAS	[H0Y5G7_HUMAN]	2	2
NUP205	[NU205_HUMAN]	2	2
RALY	[Q5QPM0_HUMAN]	2	3
RPL13	[RL13_HUMAN]	2	2
RPL14	[RL14_HUMAN]	2	2
RPS24	[E7ETK0_HUMAN]	2	2
SAP18	[H7BZW6_HUMAN]	2	2
SLC25A10	[DIC_HUMAN]	2	2
ST7	[E7EPW5_HUMAN]	2	3
SUPT20H	[H7C5F9_HUMAN]	2	2
SYNCRIP	[B7Z645_HUMAN]	2	3
TADA2B	[TAD2B_HUMAN]	2	2
TEX10	[TEX10_HUMAN]	2	2
WDR5	[WDR5_HUMAN]	2	2
XPC	[XPC_HUMAN]	2	4
YBX1	[A0A087X1S2_HUMAN]	2	4

## Sheet: MYCN_pep>2_in_nucleus
ID	Symbol
P54132	BLM
Q86V15	CASZ1
O14646	CHD1
Q86WJ1	CHD1L
F5GWX5	CHD4
Q9P2D1	CHD7
A0A0C4DGX4	CUL1
A0A087X2G1	DDX1
O00148	DDX39A
Q9UJV9	DDX41
J3KTA4	DDX5
H7BXY3	DHX30
Q08211	DHX9
A0A0C4DG02	DNMT3A
Q15029	EFTUD2
P38919	EIF4A3
Q8IYD8	FANCM
O95714	HERC2
F8W6I7	HNRNPA1
Q9UL03	INTS6
Q92830	KAT2A
O60341	KDM1A
S4R3G4	KDM2B
P49916	LIG3
O95983	MBD3
P33993	MCM7
V9H019	MSH2
P52701	MSH6
O75592	MYCBP2
P09874	PARP1
G3V167	PARP2
E7EW18	POLB
Q09028	RBBP4
P40938	RFC3
P40937	RFC5
H7BYI2	SMARCAL1
O75643	SNRNP200
Q9NUW8	TDP1
P11387	TOP1
P11388	TOP2A
Q02880	TOP2B
Q13472	TOP3A
Q96RR1	TWNK
P61964	WDR5
Q14191	WRN
P18887	XRCC1
P13010	XRCC5
P12956	XRCC6
E9PH99	ZNF451
Q96GD4	AURKB
E7EU96	CSNK2A1
P19784	CSNK2A2
M0R3C8	PNKP
P78527	PRKDC
Q8IV63	VRK3
O75531	BANF1
Q9NRL2	BAZ1A
Q9UIF8	BAZ2B
Q5T5X7	BEND3
Q7Z6I8	C5orf24
Q9Y6J0	CABIN1
P49454	CENPF
F5GYE8	CEP112
Q5SW79	CEP170
E9PG22	CEP97
Q16531	DDB1
P31689	DNAJA1
Q8WXX5	DNAJC9
P50402	EMD
Q9NY74	ETAA1
O75367	H2AFY
Q9P0M6	H2AFY2
Q7Z353	HDX
P16401	HIST1H1B
Q96QV6	HIST1H2AA
Q96KK5	HIST1H2AH
P06899	HIST1H2BJ
O60814	HIST1H2BK
P22626	HNRNPA2B1
P51991	HNRNPA3
G3V576	HNRNPC
P52597	HNRNPF
E9PCY7	HNRNPH1
M0QYL7	HNRNPL
A0A087X0X3	HNRNPM
A0A0A0MRA5	HNRNPUL1
Q9NQS7	INCENP
Q9NVH2	INTS7
Q8NC56	LEMD2
P02545	LMNA
P20700	LMNB1
Q03252	LMNB2
D6REM6	MATR3
E2QRD4	MMS22L
A0A0A6YYJ0	MSANTD3-TMEFF1
Q8NCY6	MSANTD4
H0Y5G7	NBAS
P19338	NCL
I3L100	NEURL4
A6PVY9	NHLH2
Q14980	NUMA1
Q92621	NUP205
Q9NTI5	PDS5B
O94880	PHF14
Q8WWQ0	PHIP
Q9H606	PRORY
Q6P2Q9	PRPF8
P54727	RAD23B
P43351	RAD52
H0Y6E7	RBMX
P35250	RFC2
P35249	RFC4
Q5UIP0	RIF1
Q9H9A7	RMI1
P27694	RPA1
P15927	RPA2
B5MC59	RPA3
P26373	RPL13
H0Y8L7	RPS3A
P42285	SKIV2L2
Q04837	SSBP1
Q08945	SSRP1
E7EPW5	ST7
H0Y6N5	SUN1
Q9UH99	SUN2
H7C5F9	SUPT20H
B7Z645	SYNCRIP
G3V5X4	SYNE2
Q86TJ2	TADA2B
Q9NXF1	TEX10
Q9UNS1	TIMELESS
P42167	TMPO
A0A0A0MSK5	TOR1AIP1
Q6ZU65	UBN2
B9EGQ5	WIZ
Q01831	XPC
Q9C0A1	ZFHX2
E7EVZ1	ZFHX4
Q96JM2	ZNF462
Q9ULD9	ZNF608
Q9H582	ZNF644
G5E9A6	USP11
Q7Z2E3	APTX
Q15699	ALX1
P80723	BASP1
Q9UIG0	BAZ1B
J3KPG5	BAZ2A
Q9H165	BCL11A
Q9C0K0	BCL11B
E9PK09	BCLAF1
Q6W2J9	BCOR
E7ETD6	BPTF
B5MD17	CBX1
C9J4L5	CREB1
P39880	CUX1
O75190	DNAJB6
E9PNC7	DRAP1
Q9H9B1	EHMT1
A0A0G2JIS2	EHMT2
Q969H0	FBXW7
P23771	GATA3
Q86YP4	GATAD2A
Q8WXI9	GATAD2B
P78347	GTF2I
O96004	HAND1
A0A087WT70	HAND2
Q92769	HDAC2
P54198	HIRA
A0A0C4DGA6	HLTF
E5RGZ2	HMBOX1
H0YKL0	HMG20A
B4DY09	ILF2
Q12906	ILF3
D6RBJ1	ISL1
Q03164	KMT2A
Q86U70	LDB1
P61244	MAX
P51608	MECP2
E7ESY4	MTA1
O94776	MTA2
P04198	MYCN
Q13562	NEUROD1
Q99453	PHOX2B
Q92786	PROX1
Q5QPM0	RALY
P35251	RFC1
P18124	RPL7
Q96T23	RSF1
H7BZW6	SAP18
Q01826	SATB1
E5RJR5	SKP1
P51532	SMARCA4
O60264	SMARCA5
B5MD58	SREBF1
Q12772	SREBF2
A0A087WVT6	SSBP3
Q9Y5B9	SUPT16H
O94864	SUPT7L
Q9Y6J9	TAF6L
Q32MN6	TBP
Q13207	TBX2
Q99081	TCF12
Q9UGU0	TCF20
P15923	TCF3
H3BPJ7	TCF4
Q9Y2W1	THRAP3
Q96HA7	TONSL
Q13263	TRIM28
F2Z2U4	TRRAP
Q9UNY4	TTF2
H7BY00	TWIST1
Q9NPG3	UBN1
E9PKP7	UBTF
Q15911	ZFHX3
P17029	ZKSCAN1
Q9P2Y4	ZNF219
Q9Y2X9	ZNF281
J3KNV1	ZNF292
Q8TF68	ZNF384
A0A087WZ27	ZNF90
Q00839	HNRNPU
Q96P70	IPO9
Q14974	KPNB1
P57740	NUP107

## Sheet: cMYC-Hela
Raw BioID interactome data for MYC in Hela cells (DOI: 10.1038/s41467-018-05660-0).
Gene ID	Gene Name	Protein ID
8295	TRRAP	4507691
57634	EP400	56549696
4288	MKI67	103472005
56922	MCCC1	116805327
3054	HCFC1	98986457
1108	CHD4	51599156
3313	HSPA9	24234688
1912	PHC2	37595528
23394	ADNP	12229217
221037	JMJD1C	118600981
64087	MCCC2	11545863
10594	PRPF8	91208426
23451	SF3B1	54112117
10992	SF3B2	55749531
498	ATP5A1	4757810
23269	MGA	256017163
10009	ZBTB33	296179376
57680	CHD8	282165704
9188	DDX21	50659095
5411	PNN	33356174
9092	SART1	10863889
5514	PPP1R10	25777671
7284	TUFM	34147630
1662	DDX10	13514831
4670	HNRNPM	14141152
8607	RUVBL1	4506753
55929	DMAP1	13123776
56946	C11orf30	19923559
23020	SNRNP200	40217847
80314	EPC1	13376810
57805	KIAA1967	24432106
871	SERPINH1	32454741
6599	SMARCC1	188536047
2975	GTF3C1	101943240
292	SLC25A5	156071459
1665	DHX15	68509926
54439	RBM27	168229174
731751	LOC731751	113430845
8473	OGT	32307148
27339	PRPF19	7657381
5394	EXOSC10	4505917
2969	GTF2I	14670350
29889	GNL2	7019419
9878	TOX4	7662274
23450	SF3B3	54112121
6597	SMARCA4	192807312
3550	IK	125988409
988	CDC5L	11067747
506	ATP5B	32189394
9343	EFTUD2	217272892
23223	RRP12	223278379
10524	KAT5	36287049
56949	XAB2	55770906
1655	DDX5	4758138
57062	DDX24	9966805
9219	MTA2	14141170
3065	HDAC1	13128860
6124	RPL4	16579885
117246	FTSJ3	194097365
55388	MCM10	33383235
54908	CCDC99	157388975
23309	SIN3B	52138513
3301	DNAJA1	4504511
86	ACTL6A	30089997
55689	YEATS2	33620755
23272	FAM208A	163838631
10128	LRPPRC	31621305
4691	NCL	55956788
1660	DHX9	100913206
10813	UTP14A	21361348
6594	SMARCA1	164419749
56897	WRNIP1	18426902
6950	TCP1	57863257
22938	SNW1	6912676
10856	RUVBL2	5730023
9875	URB1	194394141
6122	RPL3	4506649
55791	LRIF1	55743124
5725	PTBP1	14165464
55636	CHD7	54112403
51602	NOP58	7706254
30836	DNTTIP2	54633315
25942	SIN3A	223941782
6191	RPS4X	4506725
5832	ALDH18A1	21361368
11176	BAZ2A	91176325
26122	EPC2	194272186
23560	GTPBP4	55953087
6138	RPL15	15431293
26354	GNL3	45593130
7385	UQCRC2	50592988
6130	RPL7A	4506661
2547	XRCC6	4503841
259266	ASPM	126116596
134430	WDR36	21281677
81608	FIP1L1	201023339
55299	BRIX1	55770900
10199	MPHOSPH10	31317305
8402	SLC25A11	21361114
64324	NSD1	19923586
10399	GNB2L1	5174447
9584	RBM39	35493811
6605	SMARCE1	21264355
6601	SMARCC2	194363725
654364	NME1-NME2	66392203
23528	ZNF281	6912752
23521	RPL13A	6912634
22803	XRN2	18860916
10523	CHERP	119226260
10445	MCRS1	29893564
10147	SUGP2	224282117
9330	GTF3C3	6912398
6202	RPS8	4506743
6129	RPL7	15431301
4149	MAX	21704263
54880	BCOR	183396783
6944	VPS72	5174715
2023	ENO1	4503571
1398	CRK	41327712
904	CCNT1	17978466
5478	PPIA	10863927
5315	PKM2	33286418
157313	CDCA2	44681484
79718	TBL1XR1	19913371
79577	CDC73	40018640
58525	WIZ	151301215
10949	HNRNPA0	5803036
8089	YEATS4	5729838
6879	TAF7	14717407
6125	RPL5	14591909
3096	HIVEP1	116805342
2091	FBL	12056465
10236	HNRNPR	156151392
132660	LIN54	169234719
83746	L3MBTL2	20149698
64318	NOC3L	20806097
57167	SALL4	10047144
51366	UBR5	15147337
24144	TFIP11	56788356
6184	RPN1	4506675
1107	CHD3	158420731
10574	CCT7	261399877
57187	THOC2	125656165
57459	GATAD2B	21218438
55210	ATAD3A	283436222
51575	ESF1	18093112
9877	ZC3H11A	114842410
6185	RPN2	209413738
4999	ORC2	5453830
205860	TRIML2	27734883
23279	NUP160	54859722
254225	RNF169	148839382
221504	ZBTB9	23308693
220988	HNRNPA3	34740329
57050	UTP3	9966799
54556	ING3	38201655
25926	NOL11	21361468
24149	ZNF318	120587019
24148	PRPF6	40807485
23481	PES1	7657455
23186	RCOR1	7661892
23013	SPEN	14790190
10286	BCAS2	5031653
9349	RPL23	4506605
9328	GTF3C5	170763506
6209	RPS15	4506687
6144	RPL21	18104948
1452	CSNK1A1	68303572
79882	ZC3H14	231570121
55683	KANSL3	169234787
54881	TEX10	239787838
22984	PDCD11	70980549
10514	MYBBP1A	157694492
10165	SLC25A13	237649019
9212	AURKB	83776600
9128	PRPF4	24431950
9112	MTA1	115527080
7520	XRCC5	10863945
6201	RPS7	4506741
6169	RPL38	4506645
6136	RPL12	4506597
5931	RBBP7	4506439
488	ATP2A2	24638454
10389	SCML2	5174669
6228	RPS23	4506701
6208	RPS14	5032051
10527	IPO7	5453998
9532	BAG2	4757834
9169	SCAF11	117676384
6133	RPL9	15431303
103910	MYL12B	15809016
84991	RBM17	14249678
57798	GATAD1	88759346
55661	DDX27	224593278
54815	GATAD2A	164519146
51645	PPIL1	7706339
9790	BMS1	224589071
9329	GTF3C4	156119605
6189	RPS3A	4506723
6142	RPL18A	11415026
6117	RPA1	4506583
4839	NOP2	76150623
4297	MLL	308199413
2186	BPTF	38788260
11168	PSIP1	190014586
10432	RBM14	5454064
3619	INCENP	102467235
23469	PHF3	7662018
196528	ARID2	56549668
79915	ATAD5	26080431
56987	BBX	18378731
55646	LYAR	224591430
55193	PBRM1	30794372
29028	ATAD2	24497618
23246	BOP1	21327667
23165	NUP205	57634534
10969	EBNA1BP2	237649012
10724	MGEA5	11024698
7707	ZNF148	145386566
7690	ZNF131	84872173
7343	UBTF	115529449
6229	RPS24	14916501
5160	PDHA1	291084742
9757	MLL4	7662046
55183	RIF1	295054210
9524	TECR	24475816
509	ATP5C1	4885079
284058	KANSL1	301500643
112939	NACC1	16418383
81930	KIF18A	148612831
58509	C19orf29	122937392
51639	SF3B14	7706326
23511	NUP188	62955803
10902	BRD8	256223315
10556	RPP30	157151755
9824	ARHGAP11A	7661858
9611	NCOR1	22538461
6880	TAF9	4507351
6878	TAF6	21536359
6154	RPL26	4506621
1459	CSNK2A2	4503097
1457	CSNK2A1	29570791
57492	ARID1B	297139703
5981	RFC1	32528306
53615	MBD3	4505119
151246	SGOL2	229892197
84916	CIRH1A	186928847
55320	MIS18BP1	42415492
54443	ANLN	31657094
51780	KDM3B	38372909
51616	TAF9B	20070280
51562	MBIP	222080053
29997	GLTSCR2	239787829
27340	UTP20	120587023
26993	AKAP8L	49472841
26574	AATF	7657013
25902	MTHFD1L	36796743
23126	POGZ	302699211
11091	WDR5	16554627
10933	MORF4L1	45643135
10569	SLU7	27477111
10528	NOP56	32483374
10452	TOMM40	193083120
9987	HNRPDL	14110407
9646	CTR9	7661950
9126	SMC3	4885399
6877	TAF5	21071067
6294	SAFB	21264343
6232	RPS27	4506711
5700	PSMC1	24430151
5356	PLRG1	320118865
3725	JUN	4758616
2961	GTF2E2	4504195
1968	EIF2S3	4503507
1460	CSNK2B	23503295
1063	CENPF	55770834
80335	WDR82	147904340
11169	WDHD1	5901892
7203	CCT3	58761484
6135	RPL11	15431290
3182	HNRNPAB	55956919
54856	GON4L	82830424
7531	YWHAE	5803225
65083	NOL6	18644728
57649	PHF12	75677357
56993	TOMM22	9910382
55143	CDCA8	8922438
55127	HEATR1	73695475
11177	BAZ1A	32967603
10939	AFG3L2	300192933
10919	EHMT2	156142197
10898	CPSF4	125987603
10657	KHDRBS1	5730027
9070	ASH2L	157412280
8602	NOP14	55769587
7150	TOP1	11225260
6224	RPS20	226246671
5985	RFC5	194306567
5520	PPP2R2A	294832006
4236	MFAP1	50726968
641	BLM	4557365
103	ADAR	301601658
9588	PRDX6	4758638
6134	RPL10	223890243
3028	HSD17B10	4758504
100529239	RPS10-NUDT3	321117084
222229	LRWD1	23097240
91748	C14orf43	112807226
81887	LAS1L	13654270
64794	DDX31	17505907
57794	SUGP1	33469964
57510	XPO5	22748937
55602	CDKN2AIP	8923040
55578	FAM48A	8923735
54934	KANSL2	154426300
54623	PAF1	42476169
27043	PELP1	155030232
26054	SENP6	156105701
10915	TCERG1	21327715
9493	KIF23	20143967
9352	TXNL1	4759274
9123	SLC16A3	109288010
8886	DDX18	38327634
8813	DPM1	4503363
8451	CUL4A	11140811
7290	HIRA	21536485
7023	TFAP4	4507447
6472	SHMT2	19923315
6428	SRSF3	4506901
6230	RPS25	4506707
6155	RPL27	4506623
3836	KPNA1	222144293
3185	HNRNPF	148470397
84444	DOT1L	22094135
23264	ZC3H7B	27881484
22880	MORC2	7662340
7879	RAB7A	34147513
6418	SET	170763498
643752	RAP1BL	310114787
25836	NIPBL	47578105
113130	CDCA5	18087845
84154	RPF2	39930469
84108	PCGF6	58761530
79595	SAP130	19923597
64397	ZFP106	11968023
55922	NKRF	291084505
55035	NOL8	46048234
29127	RACGAP1	186910300
26155	NOC2L	157694511
25792	CIZ1	196115141
23613	ZMYND8	34335262
23517	SKIV2L2	193211480
23212	RRS1	14719402
23028	KDM1A	58761544
10847	SRCAP	146219843
10412	NSA2	7662677
10153	CEBPZ	42542392
9439	MED23	28558969
9320	TRIP12	10863903
8243	SMC1A	30581135
8061	FOSL1	4885243
5929	RBBP5	300796323
5870	RAB6A	19923231
4798	NFRKB	219802034
4779	NFE2L1	4505379
4175	MCM6	7427519
1642	DDB1	148529014
1029	CDKN2A	300863096
191	AHCY	9951915
58	ACTA1	4501881
100510073	LOC100510073	310127973
54888	NSUN2	301336155
7227	TRPS1	90652851
4176	MCM7	33469968
23	ABCF1	10947135
51747	LUC7L3	19923485
153443	SRFBP1	103471995
125950	RAVER1	123173757
114823	LENG8	24308382
113251	LARP4	283046701
84365	MKI67IP	222352111
84318	CCDC77	14150165
84146	ZNF644	41152093
79954	NOL10	171460958
79707	NOL9	40217805
79228	THOC6	215272341
63967	CLSPN	21735569
56915	EXOSC5	47174864
55621	TRMT1	209862871
55252	ASXL2	153792780
54906	FAM208B	296011010
54799	MBTD1	158508476
54555	DDX49	31542656
51574	LARP7	109809739
51322	WAC	18379328
27341	RRP7A	25092725
26121	PRPF31	221136939
10952	SEC61B	5803165
10945	KDELR1	5803048
10212	DDX39A	21040371
10112	KIF20A	5032013
9810	RNF40	7662230
9785	DHX38	17999539
9775	EIF4A3	7661920
9425	CDYL	221136753
7874	USP7	150378533
6874	TAF4	110832843
6239	RREB1	270132929
6218	RPS17L	312284072
5393	EXOSC9	77812670
4704	NDUFA9	6681764
4298	MLLT1	21361272
4100	MAGEA1	148276977
3839	KPNA3	34485722
38	ACAT1	4557237
84467	FBN3	56237021
65993	MRPS34	13027604
64710	NUCKS1	56118310
51637	C14orf166	7706322
10940	POP1	225007648
10629	TAF6L	5453844
9585	KIF20B	46049114
9410	SNRNP40	115298668
1871	E2F3	4503433
23160	WDR43	157743245
286826	LIN9	32996737
116092	DNTTIP1	16418441
112869	CCDC101	19923935
92609	TIMM50	48526509
84678	KDM2B	54112380
84148	KAT8	226371636
83759	RBM4B	13899354
79039	DDX54	164419743
57619	SHROOM3	203098098
57109	REXO4	76781492
56254	RNF20	34878777
55257	C20orf20	8922764
51535	PPHLN1	219842247
51434	ANAPC7	212549736
29117	BRD7	291219913
27107	ZBTB11	166235167
23347	SMCHD1	148839305
23244	PDS5A	155030216
23016	EXOSC7	189083688
10989	IMMT	154354962
10171	RCL1	157426877
9643	MORF4L2	215490021
9577	BRE	21361171
9055	PRC1	40807443
7171	TPM4	4507651
7020	TFAP2A	109389358
6732	SRPK1	47419936
6638	SNRPN	13027644
6603	SMARCD2	148536864
6434	TRA2B	4759098
5878	RAB5C	41393545
5707	PSMD1	25777600
4931	NVL	45643123
3070	HELLS	21914927
2355	FOSL2	4885245
1998	ELF2	42544172
124245	ZC3H18	255652953
117143	TADA1	16596696
79002	C19orf43	13128992
64426	SUDS3	75677351
10981	RAB32	5803133
10885	WDR3	5803221
9904	RBM19	226497574
8535	CBX4	55770830
8289	ARID1A	21264565
6176	RPLP1	4506669
4904	YBX1	34098946
4698	NDUFA5	4826848
4513	COX2	251831110
3833	KIFC1	167555110
2778	GNAS	117938759
1650	DDOST	20070197
1523	CUX1	148277064
1431	CS	38327625
9589	WTAP	21361159
25824	PRDX5	32455260
85395	FAM207A	17158023
64425	POLR1E	11968047
51497	TH1L	39812492
51010	EXOSC3	50511939
23530	NNT	122939153
23310	NCAPD3	45356151
23076	RRP1B	57863269
10935	PRDX3	32483377
6838	SURF6	19557702
6223	RPS19	4506695
5705	PSMC5	24497435
5501	PPP1CC	4506007
4605	MYBL2	4505293
2108	ETFA	189181759
1022	CDK7	4502743
692312	PPAN-P2RY11	310923196
653252	TIMM23B	310120500
400506	C16orf88	111607441
140876	FAM65C	109689705
118460	EXOSC6	17402904
88745	RRP36	24308350
84946	LTV1	21361875
84321	THOC3	14150171
83855	KLF16	13994287
81565	NDEL1	13540600
64965	MRPS9	33188463
64834	ELOVL1	13489093
57332	CBX8	10190682
57117	INTS12	21361851
55726	ASUN	155030185
55272	IMP3	8922794
55215	FANCI	164607124
55157	DARS2	40789249
55131	RBM28	187960109
54617	INO80	38708321
54499	TMCO1	24308133
51118	UTP11L	156415994
51003	MED31	7705592
29789	OLA1	58761500
29079	MED4	7661788
26168	SENP3	21361499
25873	RPL36	16117794
23144	ZC3H3	155722994
11338	U2AF2	6005926
11047	ADRM1	28373192
11021	RAB35	5803135
10979	FERMT2	201861813
10772	SRSF10	16905517
10607	TBL3	19913369
10469	TIMM44	33636719
10465	PPIH	5454154
9968	MED12	110347429
9933	KIAA0020	109948283
8872	CDC123	221316620
8841	HDAC3	13128862
8805	TRIM24	47419909
8667	EIF3H	4503515
8565	YARS	4507947
8086	AAAS	12962937
7917	BAG6	149158692
7532	YWHAG	21464101
7514	XPO1	4507943
7027	TFDP1	6005900
6749	SSRP1	4507241
6602	SMARCD1	133908629
6389	SDHA	156416003
6168	RPL37A	4506643
6156	RPL30	4506631
5702	PSMC3	21361144
5558	PRIM2	41349495
5347	PLK1	21359873
5073	PARN	197333695
4774	NFIA	224465182
4728	NDUFS8	4505371
4536	ND2	251831108
4508	ATP6	251831112
4292	MLH1	4557757
3251	HPRT1	4504483
3015	H2AFZ	4504255
2963	GTF2F2	4758488
2744	GLS	156104878
1778	DYNC1H1	33350932
1717	DHCR7	119943112
1629	DBT	110671329
1434	CSE1L	29029559
1191	CLU	283806712
123624	AGBL1	120444924
90737	PAGE5	19743940
54904	WHSC1L1	13699811
22913	RALY	21396480
10623	POLR3C	21359969
8930	MBD4	4505121
7133	TNFRSF1B	4507577
6161	RPL32	4506635
5861	RAB1A	4758988
5162	PDHB	156564403
1468	SLC25A10	20149598
253143	PRR14L	209969819
221937	FOXK1	82546824
196385	DNAH10	198442844
93661	CAPZA3	15277417
80145	THOC7	156151381
80063	ATF7IP2	38569430
64978	MRPL38	169636418
64783	RBM15	319996623
64769	MEAF6	40255020
60559	SPCS3	11345462
55735	DNAJC11	217035105
55379	LRRC59	40254924
54606	DDX56	9506931
29102	DROSHA	155030234
25980	C20orf4	18034690
25879	DCAF13	229892270
23764	MAFF	239048350
11214	AKAP13	21493029
10916	MAGED2	19387846
10744	PTTG2	154354976
10427	SEC24B	112382212
10001	MED6	42544155
9512	PMPCB	94538354
9025	RNF8	34304336
7030	TFE3	8659574
6942	TCF20	31652242
6921	TCEB1	5032161
5717	PSMD11	28872725
5042	PABPC3	45238849
4719	NDUFS1	316983154
4172	MCM3	6631095
3609	ILF3	212549553
3298	HSF2	207113147
2915	GRM5	219842343
817	CAMK2D	212549753

## Sheet: MYCN-cMYC_common
Common protein partners of MYCN and c-MYC
ATAD3A
ATP2A2
ATP5A1
ATP5C1
AURKB
BAG2
BAZ1A
BAZ2A
BCOR
BLM
BPTF
CCT3
CENPF
CHD4
CHD7
CSNK2A1
CSNK2A2
CUX1
DDB1
DDX39A
DDX5
DHX9
DNAJA1
DYNC1H1
EFTUD2
EHMT2
EIF4A3
GATAD2A
GATAD2B
GNAS
GTF2I
HIRA
HNRNPA3
HNRNPF
HNRNPM
HSPA9
ILF3
IMMT
INCENP
KDM1A
KDM2B
LRPPRC
MAX
MBD3
MCM7
MRPS9
MTA1
MTA2
NCL
NDUFA9
NUP205
PNN
PRPF8
RALY
RFC1
RFC5
RIF1
RPA1
RPL15
RPL4
RPL7
RPS15
RPS24
RPS3A
RPS4X
RPS8
SKIV2L2
SLC25A10
SLC25A11
SLC25A13
SLC25A5
SMARCA4
SNRNP200
SSRP1
TAF6L
TCF20
TECR
TEX10
TOP1
TRRAP
TUFM
UBTF
WDR5
WIZ
XRCC5
XRCC6
YBX1
ZNF281
ZNF644

## Sheet: MYCN-HEK293
Proteins identified in MYCN protein complexes in HEK293 cells (DOI: 10.1186/s12935-021-02259-2)
Protein.names	Gene.names
Cyclin-dependent kinase 1	CDK1
Vigilin	HDLBP
40S ribosomal protein S9	RPS9
Proteasome subunit alpha type;Proteasome subunit alpha type-2	PSMA2
Diablo homolog, mitochondrial	DIABLO
MHC class I polypeptide-related sequence A, isoform CRA_a	MICA
Large proline-rich protein BAG6	BAT3;BAG6
Phospholipid-transporting ATPase;Phospholipid-transporting ATPase IG	ATP11C
Dystrophin	DMD
Cysteine-rich protein 2-binding protein	CSRP2BP
Immunoglobulin kappa variable 2-29	IGKV2D-29
Activating molecule in BECN1-regulated autophagy protein 1	AMBRA1
Epiplakin	EPPK1
DDB1- and CUL4-associated factor 13	DCAF13
Cat eye syndrome critical region protein 2	CECR2
Far upstream element-binding protein 2	KHSRP
E3 ubiquitin-protein ligase UHRF1	UHRF1
Beta-catenin-like protein 1	CTNNBL1
Fibroblast growth factor;Fibroblast growth factor 2	FGF2
Heterogeneous nuclear ribonucleoprotein D-like	HNRNPDL
Proteasome subunit beta type-3	PSMB3
Retrotransposon-derived protein PEG10	PEG10
Eukaryotic translation initiation factor 5B	EIF5B
Serine/threonine-protein kinase greatwall	MASTL
ADP-ribosylation factor-like protein 15	ARL15
Uncharacterized protein C1orf109	C1orf109
FGFR1 oncogene partner	FGFR1OP
Dual specificity protein kinase CLK1	CLK1
Monofunctional C1-tetrahydrofolate synthase, mitochondrial	MTHFD1L
Smoothelin	SMTN
Clathrin heavy chain;Clathrin heavy chain 1	CLTC
Protein kinase C-binding protein 1	ZMYND8
DNA-directed RNA polymerases I, II, and III subunit RPABC1	POLR2E
Lethal(2) giant larvae protein homolog 1	LLGL1
DNA polymerase delta subunit 2	POLD2
IQ motif and SEC7 domain-containing protein 1	IQSEC1
Trafficking protein particle complex subunit 3	TRAPPC3
Round spermatid basic protein 1	RSBN1
THO complex subunit 1	THOC1
Protein fantom	RPGRIP1L
Proteasomal ubiquitin receptor ADRM1	ADRM1
Nucleolar protein of 40 kDa	ZCCHC17
60S ribosomal protein L17	RPL17
Required for meiotic nuclear division protein 1 homolog	RMND1
Vacuolar protein sorting-associated protein VTA1 homolog	VTA1
AP-2 complex subunit mu	AP2M1
Tumor protein D54	TPD52L2
Prostaglandin E synthase 3	PTGES3
Ribonucleoprotein PTB-binding 1	RAVER1
Intermediate filament family orphan 1	IFFO1
Eukaryotic translation initiation factor 3 subunit H	EIF3H
Cyclin-dependent kinase 16	CDK16
Protein SET;Protein SETSIP	SET;SETSIP
Kinesin-like protein;Centromere-associated protein E	CENPE
Nodal modulator 1	NOMO1
Ras-related protein Rab-18	RAB18
Krueppel-like factor 13	KLF13
Acyl-protein thioesterase 1	LYPLA1
MAP3K12-binding inhibitory protein 1	MBIP
Ribonuclease P protein subunit p40	RPP40
Gamma-tubulin complex component 5	TUBGCP5
Agrin;Agrin N-terminal 110 kDa subunit;Agrin C-terminal 110 kDa subunit;Agrin C-terminal 90 kDa fragment;Agrin C-terminal 22 kDa fragment	AGRN
Protein CIP2A	KIAA1524
WASH complex subunit 7	KIAA1033
C-Jun-amino-terminal kinase-interacting protein 4	SPAG9
E3 ubiquitin-protein ligase HECTD1	HECTD1
26S protease regulatory subunit 10B	PSMC6
WD repeat-containing protein 20	WDR20
WD repeat-containing protein 18	WDR18
Unconventional myosin-X	MYO10
Coiled-coil domain-containing protein 14	CCDC14
Heterogeneous nuclear ribonucleoprotein U-like protein 1	HNRNPUL1
Exocyst complex component 7	EXOC7
Nesprin-2	SYNE2
39S ribosomal protein L19, mitochondrial	MRPL19
A-kinase anchor protein 9	AKAP9
Protein-L-isoaspartate O-methyltransferase;Protein-L-isoaspartate(D-aspartate) O-methyltransferase	PCMT1
WD repeat-containing protein WRAP73	WRAP73
Helicase SRCAP	SRCAP
Protein SCAF8	SCAF8
Peptidyl-prolyl cis-trans isomerase;FK506-binding protein 15	FKBP15
WD repeat-containing protein 36	WDR36
E3 ubiquitin-protein ligase RNF213	RNF213
Double-stranded RNA-binding protein Staufen homolog 2	STAU2
Integrin-linked protein kinase	ILK
Cullin-2	CUL2
Titin	TTN
E3 ubiquitin-protein ligase ZFP91	ZFP91
Condensin-2 complex subunit H2	NCAPH2
Suppressor of SWI4 1 homolog	PPAN
Microtubule-actin cross-linking factor 1, isoforms 1/2/3/5	MACF1
Coronin;Coronin-7	CORO7
Transketolase	TKT
Baculoviral IAP repeat-containing protein 5	BIRC5
Lymphoid-specific helicase	HELLS
Mediator of RNA polymerase II transcription subunit 24	MED24
Chromosome 11 open reading frame 48, isoform CRA_c	C11orf98
Zinc finger and SCAN domain-containing protein 25	ZSCAN25
WD repeat-containing protein 76	WDR76
Peroxisome biogenesis factor 1	PEX1
Nesprin-1	SYNE1
Probable ATP-dependent RNA helicase DDX46	DDX46
Helicase-like transcription factor	HLTF
Lysine-specific demethylase 2B	KDM2B
Chromodomain-helicase-DNA-binding protein 4	CHD4
ARF GTPase-activating protein GIT1	GIT1
Kinesin-like protein;Kinesin-like protein KIF18B	KIF18B
Calpain small subunit 1	CAPNS1
Dehydrogenase/reductase SDR family member 7B	DHRS7B
Dolichyl-diphosphooligosaccharide--protein glycosyltransferase 48 kDa subunit	DDOST
Cullin-1	CUL1
Cyclin-dependent kinase 11A;Cyclin-dependent kinase 11B	CDK11B;CDK11A
Transducin-like enhancer protein 3	TLE3
Mitogen-activated protein kinase kinase kinase kinase 4	MAP4K4
ATP-dependent RNA helicase DDX3X;ATP-dependent RNA helicase DDX3Y	DDX3X;DDX3Y
E3 ubiquitin-protein ligase SHPRH	SHPRH
PWWP domain-containing protein MUM1	MUM1
Protein diaphanous homolog 1	DIAPH1
Histone-lysine N-methyltransferase EHMT2	EHMT2
Heat shock 70 kDa protein 1B;Heat shock 70 kDa protein 1A	HSPA1B;HSPA1A
Occludin	OCLN
Protein scribble homolog	SCRIB
Poly(U)-binding-splicing factor PUF60	PUF60
Serum paraoxonase/arylesterase 2	PON2
Matrin-3	MATR3
Claudin domain-containing protein 1	CLDND1
Interferon-related developmental regulator 2	IFRD2
Casein kinase I isoform gamma-1	CSNK1G1
PHD finger protein 14	PHF14
Calcium uptake protein 1, mitochondrial	MICU1
Transcriptional repressor p66-beta	GATAD2B
Protein enabled homolog	ENAH
Negative elongation factor B	NELFB
Rab11 family-interacting protein 5	RAB11FIP5
KIF1-binding protein	KIF1BP
Protein EFR3 homolog A	EFR3A
Histone-lysine N-methyltransferase EHMT1	EHMT1
Unconventional myosin-XVIIIa	MYO18A
Renin receptor	ATP6AP2
GPI transamidase component PIG-T	PIGT
Myosin phosphatase Rho-interacting protein	MPRIP
Survival motor neuron protein	SMN1;SMN2
DNA repair protein complementing XP-G cells	;ERCC5
Probable ATP-dependent RNA helicase DDX17	DDX17
D-3-phosphoglycerate dehydrogenase	PHGDH
Protein MON2 homolog	MON2
Calcium/calmodulin-dependent protein kinase type II subunit gamma	CAMK2G
Protein SERAC1	SERAC1
Centrosomal protein of 78 kDa	CEP78
Leukocyte surface antigen CD47	CD47
Transcription activator BRG1	SMARCA4
Transcriptional repressor CTCF	CTCF
Catenin beta-1	CTNNB1
Ataxin-2	ATXN2
DNA-directed RNA polymerases I and III subunit RPAC1	POLR1C
40S ribosomal protein S7	RPS7
E3 ubiquitin-protein ligase HECW2	HECW2
TFIIH basal transcription factor complex helicase XPB subunit	ERCC3
Liprin-alpha-1	PPFIA1
Cyclin-dependent kinase 13	CDK13
40S ribosomal protein S14	RPS14
40S ribosomal protein S29	RPS29
SWI/SNF-related matrix-associated actin-dependent regulator of chromatin subfamily E member 1	SMARCE1
Peroxisomal multifunctional enzyme type 2;(3R)-hydroxyacyl-CoA dehydrogenase;Enoyl-CoA hydratase 2	HSD17B4
Casein kinase II subunit alpha;Casein kinase II subunit alpha 3	CSNK2A1;CSNK2A3
Peripheral plasma membrane protein CASK	CASK
Vacuolar protein sorting-associated protein 33A	VPS33A
Rho guanine nucleotide exchange factor 7	ARHGEF7
CD59 glycoprotein	CD59
Intraflagellar transport protein 56	TTC26
Extended synaptotagmin-2	ESYT2
Pleckstrin homology domain-containing family A member 5	PLEKHA5
Pleckstrin homology domain-containing family G member 3	PLEKHG3
Protein FAM92A1	FAM92A1
Ral GTPase-activating protein subunit beta	RALGAPB
Major prion protein	PRNP
Vacuolar protein sorting-associated protein 37C	VPS37C
Histone acetyltransferase;Histone acetyltransferase KAT6A	MYST3;KAT6A
CCR4-NOT transcription complex subunit 1	CNOT1
Host cell factor 1;HCF N-terminal chain 1;HCF N-terminal chain 2;HCF N-terminal chain 3;HCF N-terminal chain 4;HCF N-terminal chain 5;HCF N-terminal chain 6;HCF C-terminal chain 1;HCF C-terminal chain 2;HCF C-terminal chain 3;HCF C-terminal chain 4;HCF C-terminal chain 5;HCF C-terminal chain 6	HCFC1
Zinc finger protein 316	ZNF316
Zinc finger MYM-type protein 3	ZMYM3
Structural maintenance of chromosomes flexible hinge domain-containing protein 1	SMCHD1
39S ribosomal protein L23, mitochondrial	MRPL23
Phosphatidylinositol 4-phosphate 5-kinase type-1 alpha	PIP5K1A
Protein FAM127A;Protein FAM127C	FAM127A;FAM127C
Zinc finger SWIM domain-containing protein 8	ZSWIM8
Protein TSSC1	TSSC1
E3 ubiquitin-protein ligase RNF185	RNF185
Serine/arginine repetitive matrix protein 1	SRRM1
Chromobox protein homolog 6	CBX6
Eukaryotic translation initiation factor 3 subunit L	EIF3L
RNA-binding protein EWS	EWSR1
Centromere protein M	CENPM
Syntaxin-12	STX12
Ribose-phosphate pyrophosphokinase 1;Ribose-phosphate pyrophosphokinase 2;Ribose-phosphate pyrophosphokinase 3	PRPS1;PRPS1L1;PRPS2
Paralemmin-2	PALM2-AKAP2;PALM2
Lymphocyte function-associated antigen 3	CD58
Complement decay-accelerating factor	CD55
Heterogeneous nuclear ribonucleoproteins C1/C2	HNRNPC
Unconventional myosin-IXa	MYO9A
Mortality factor 4-like protein 1	MORF4L1
Centromere protein H	CENPH
Nuclear receptor coactivator 4	NCOA4
CaM kinase-like vesicle-associated protein	CAMKV
Protein transport protein Sec61 subunit alpha isoform 1;Protein transport protein Sec61 subunit alpha isoform 2	SEC61A1;SEC61A2
Receptor protein-tyrosine kinase;Receptor tyrosine-protein kinase erbB-2	ERBB2
Interleukin enhancer-binding factor 2	ILF2
Peroxisomal targeting signal 1 receptor	PEX5
Serine/threonine-protein kinase 26	STK26
Protein OS-9	OS9
Echinoderm microtubule-associated protein-like 4	EML4
Pescadillo homolog	PES1
Septin-2	SEPT2
GTP-binding nuclear protein Ran	RAN
Probable ATP-dependent RNA helicase DDX27	DDX27
CCR4-NOT transcription complex subunit 3	CNOT3
Receptor protein-tyrosine kinase;Ephrin type-A receptor 5	EPHA5
SLIT-ROBO Rho GTPase-activating protein 2	SRGAP2
Mitotic-spindle organizing protein 2A;Mitotic-spindle organizing protein 2B	MZT2B;MZT2A
Small ubiquitin-related modifier 1	SUMO1
SWI/SNF-related matrix-associated actin-dependent regulator of chromatin subfamily D member 2	SMARCD2
Putative WAS protein family homolog 3;WAS protein family homolog 2;WAS protein family homolog 1	WASH3P;WASH2P;WASH1
DNA-directed RNA polymerase;DNA-directed RNA polymerase II subunit RPB2	POLR2B
Protein CMSS1	CMSS1
Polycomb group RING finger protein 3	PCGF3
UBAP1-MVB12-associated (UMA)-domain containing protein 1	UMAD1
Phospholipid scramblase 1	PLSCR1
40S ribosomal protein SA	RPSA
Translocon-associated protein subunit gamma	SSR3
HMG box transcription factor BBX	BBX
Transmembrane and ubiquitin-like domain-containing protein 1	TMUB1
Angio-associated migratory cell protein	AAMP
COP9 signalosome complex subunit 1	GPS1
28S ribosomal protein S34, mitochondrial	MRPS34
DNA-directed RNA polymerases I, II, and III subunit RPABC3	POLR2H
Nuclear respiratory factor 1	NRF1
DnaJ homolog subfamily B member 2	DNAJB2
MICOS complex subunit MIC19	CHCHD3
Complex I assembly factor TIMMDC1, mitochondrial	TIMMDC1
Leptin receptor overlapping transcript-like 1	LEPROTL1
Ribonuclease P protein subunit p20	POP7
60S ribosomal protein L22-like 1	RPL22L1
Ras-associated and pleckstrin homology domains-containing protein 1	RAPH1
Neurabin-2	PPP1R9B
60S ribosomal protein L32	RPL32
Interleukin-1 receptor-associated kinase 1	IRAK1
Calcium/calmodulin-dependent protein kinase type II subunit delta	CAMK2D
COP9 signalosome complex subunit 4	COPS4
Eukaryotic translation initiation factor 4E	EIF4E
Septin-11	40787
Protein transport protein Sec31A	SEC31A
Syntaxin-18	STX18
Protein asteroid homolog 1	ASTE1
Centromere protein K	CENPK
CLIP-associating protein 2	CLASP2
Centrosomal protein CEP57L1	CEP57L1;C6orf182
Chromatin accessibility complex protein 1	CHRAC1
Transcription elongation factor B polypeptide 1	TCEB1
CCR4-NOT transcription complex subunit 8	CNOT8
PH and SEC7 domain-containing protein 3	PSD3
Centrin-3	CETN3
S-phase kinase-associated protein 1	SKP1
Menin	MEN1
Mediator of RNA polymerase II transcription subunit 22	MED22
Ras-related protein Rab-1A	RAB1A
T-complex protein 1 subunit epsilon	CCT5
Septin-7	39326
Protein PRRC2C	PRRC2C
Tankyrase-1	TNKS
Ezrin	EZR
Metastasis-associated protein MTA3	MTA3
PR domain zinc finger protein 15	PRDM15
Zinc finger CCCH domain-containing protein 18	ZC3H18
Syndecan;Syndecan-2	SDC2
39S ribosomal protein L22, mitochondrial	MRPL22
Neurofilament medium polypeptide	NEFM
RNA-binding motif, single-stranded-interacting protein 1	RBMS1
39S ribosomal protein L3, mitochondrial	MRPL3
Procollagen-lysine,2-oxoglutarate 5-dioxygenase 2	PLOD2
Pericentriolar material 1 protein	PCM1
Microtubule-associated protein;Microtubule-associated protein 4	MAP4
Dystrobrevin;Dystrobrevin beta	DTNB
Kinesin light chain 1	KLC1
U4/U6 small nuclear ribonucleoprotein Prp31	PRPF31
Triple functional domain protein	TRIO
Eukaryotic translation initiation factor 4B	EIF4B
Caldesmon	CALD1
Dynactin subunit 1	DCTN1;DKFZp686E0752
Chromosome transmission fidelity protein 18 homolog	CHTF18
Nascent polypeptide-associated complex subunit alpha;Nascent polypeptide-associated complex subunit alpha, muscle-specific form	NACA
Epsin-2	EPN2
Multifunctional protein ADE2;Phosphoribosylaminoimidazole-succinocarboxamide synthase;Phosphoribosylaminoimidazole carboxylase	PAICS
Acylglycerol kinase, mitochondrial	AGK
Serine/threonine-protein kinase MARK2	MARK2
2-oxoglutarate dehydrogenase, mitochondrial	OGDH
Golgi SNAP receptor complex member 1	GOSR1
Protein SMG7	SMG7
Unconventional myosin-Ib	MYO1B
Far upstream element-binding protein 1	FUBP1
Transducin beta-like protein 2	TBL2
Centrosomal protein of 97 kDa	CEP97
Peptidyl-prolyl cis-trans isomerase G;Peptidyl-prolyl cis-trans isomerase	PPIG
COP9 signalosome complex subunit 8	COPS8
NADH dehydrogenase [ubiquinone] 1 beta subcomplex subunit 9	NDUFB9
Zinc finger protein 451	ZNF451
Condensin complex subunit 2	NCAPH
SUN domain-containing protein 1	SUN1
ITPR-interacting domain-containing 2	SSFA2
T-complex protein 11-like protein 1	TCP11L1
Acyl-coenzyme A thioesterase 8	ACOT8
Elongation factor 1-delta	EEF1D
Serine/threonine-protein phosphatase 6 regulatory subunit 3	PPP6R3
Protein arginine N-methyltransferase 1	PRMT1
Nucleolar transcription factor 1	UBTF
Peptidyl-prolyl cis-trans isomerase;Peptidyl-prolyl cis-trans isomerase E	PPIE
Midkine	MDK
26S protease regulatory subunit 6A	PSMC3
Baculoviral IAP repeat-containing protein 2	BIRC2
Methylosome subunit pICln	CLNS1A
Telomerase Cajal body protein 1	WRAP53
LIM domain only protein 7	LMO7
ATP synthase subunit g, mitochondrial	ATP5L
NADH dehydrogenase [ubiquinone] iron-sulfur protein 8, mitochondrial	NDUFS8
Transformation/transcription domain-associated protein	TRRAP
tRNA (uracil-5-)-methyltransferase homolog A	TRMT2A
Exportin-4	XPO4
NADH dehydrogenase [ubiquinone] iron-sulfur protein 7, mitochondrial	NDUFS7
V-type proton ATPase subunit d 1	ATP6V0D1
ADP-ribosylation factor-like protein 6-interacting protein 4	ARL6IP4
4F2 cell-surface antigen heavy chain	SLC3A2
Small nuclear ribonucleoprotein G;Putative small nuclear ribonucleoprotein G-like protein 15	SNRPG;SNRPGP15
Gephyrin;Molybdopterin adenylyltransferase;Molybdopterin molybdenumtransferase	GPHN
Uncharacterized protein KIAA1211	KIAA1211
Golgi-associated PDZ and coiled-coil motif-containing protein	GOPC
C-1-tetrahydrofolate synthase, cytoplasmic;Methylenetetrahydrofolate dehydrogenase;Methenyltetrahydrofolate cyclohydrolase;Formyltetrahydrofolate synthetase;C-1-tetrahydrofolate synthase, cytoplasmic, N-terminally processed	MTHFD1
Cip1-interacting zinc finger protein	CIZ1
Protein transport protein Sec23A	SEC23A
Nucleosome assembly protein 1-like 1	NAP1L1
Tubulin alpha-1C chain	TUBA1C
ATP-dependent RNA helicase DDX55	DDX55
Cleavage and polyadenylation specificity factor subunit 7	CPSF7
Uncharacterized protein C12orf43	C12orf43
Set1/Ash2 histone methyltransferase complex subunit ASH2	ASH2L
Dystonin	DST
Transcription factor SPT20 homolog	SUPT20H
Ran-specific GTPase-activating protein	RANBP1
CAD protein;Glutamine-dependent carbamoyl-phosphate synthase;Aspartate carbamoyltransferase;Dihydroorotase	CAD
Bromodomain adjacent to zinc finger domain protein 2A	BAZ2A
CCR4-NOT transcription complex subunit 2	CNOT2
Coatomer subunit zeta-1	COPZ1
Charged multivesicular body protein 1a	CHMP1A
Protein SCAF11	SCAF11
5-AMP-activated protein kinase subunit gamma-1	PRKAG1
Poly(rC)-binding protein 2;Poly(rC)-binding protein 3	PCBP2;PCBP3
Periphilin-1	PPHLN1
Microspherule protein 1	MCRS1
Heterogeneous nuclear ribonucleoprotein A1;Heterogeneous nuclear ribonucleoprotein A1, N-terminally processed	HNRNPA1
60S ribosomal protein L10	RPL10
WASH complex subunit FAM21A;WASH complex subunit FAM21C	FAM21A;FAM21C
Histone RNA hairpin-binding protein	SLBP
Insulin-like growth factor 2 mRNA-binding protein 2	IGF2BP2
G protein-coupled receptor kinase 6	GRK6
Actin-related protein 2/3 complex subunit 4	ARPC4-TTLL3;ARPC4
LIM domain only protein 7	LMO7
Transmembrane protein 50B	TMEM50B
Translocation protein SEC62	SEC62
Poly [ADP-ribose] polymerase 2	PARP2
Tight junction protein ZO-1	TJP1
rRNA-processing protein FCF1 homolog	FCF1
ATP synthase subunit f, mitochondrial	ATP5J2-PTCD1;ATP5J2
DDB1- and CUL4-associated factor 8	DCAF8
Cyclin-dependent kinase 2	CDK2
Proteasome subunit alpha type;Proteasome subunit alpha type-6	PSMA6
Zinc finger protein 512	ZNF512
Ubiquitin carboxyl-terminal hydrolase;Ubiquitin carboxyl-terminal hydrolase 11	USP11
ADP-ribosylation factor GTPase-activating protein 2	ARFGAP2
Hermansky-Pudlak syndrome 3 protein	HPS3
28S ribosomal protein S22, mitochondrial	MRPS22
Chondroitin sulfate glucuronyltransferase	CHPF2
28S ribosomal protein S27, mitochondrial	MRPS27
Cell division cycle protein 27 homolog	CDC27
Heterogeneous nuclear ribonucleoprotein H;Heterogeneous nuclear ribonucleoprotein H, N-terminally processed	HNRNPH1
Myosin phosphatase Rho-interacting protein	MPRIP
Inosine-5-monophosphate dehydrogenase 2	IMPDH2
Rab-like protein 6	RABL6
Band 4.1-like protein 2	EPB41L2
60S ribosomal protein L36a	RPL36A;RPL36A-HNRNPH2
Drebrin-like protein	DBNL
Lysine-specific histone demethylase 1B	KDM1B
Nicastrin	NCSTN
DNA topoisomerase;DNA topoisomerase 3-beta-1	TOP3B
Calmodulin-3	CALM2
Centromere protein C	CENPC
Translation machinery-associated protein 16	TMA16
28S ribosomal protein S28, mitochondrial	MRPS28
Pericentriolar material 1 protein	PCM1
Integrator complex subunit 8	INTS8
Protein FAM193B	FAM193B
Pumilio homolog 1	PUM1
Gem-associated protein 2	GEMIN2
Trifunctional enzyme subunit alpha, mitochondrial;Long-chain enoyl-CoA hydratase;Long chain 3-hydroxyacyl-CoA dehydrogenase	HADHA
Transient receptor potential cation channel subfamily M member 7	TRPM7
Ankyrin repeat domain-containing protein 17	ANKRD17
40S ribosomal protein S27;40S ribosomal protein S27-like	RPS27L
Ras-related protein Rab-11A;Ras-related protein Rab-11B	RAB11A;RAB11B
RNA-binding protein with serine-rich domain 1	RNPS1
40S ribosomal protein S17	RPS17
Pyridoxal-dependent decarboxylase domain-containing protein 1	PDXDC1
M-phase phosphoprotein 6	MPHOSPH6
E3 ubiquitin-protein ligase BRE1B	RNF40
Microtubule-actin cross-linking factor 1, isoforms 1/2/3/5	MACF1
RNA-binding protein FUS	FUS
Adenine phosphoribosyltransferase	APRT
Non-canonical poly(A) RNA polymerase PAPD5	PAPD5
Dynactin subunit 5	DCTN5
Cirhin	CIRH1A
Centromere protein T	CENPT
Sphingomyelin phosphodiesterase 4	SMPD4
Nucleoporin p58/p45	NUPL1
Tropomyosin 1 (Alpha), isoform CRA_m	TPM1
Reticulon-4 receptor	RTN4R
Zinc finger MYM-type protein 4	ZMYM4
Probable rRNA-processing protein EBP2	EBNA1BP2
FERM, ARHGEF and pleckstrin domain-containing protein 2	FARP2
Glypican-1;Secreted glypican-1	GPC1
28S ribosomal protein S17, mitochondrial	hCG_1984214;MRPS17
Vesicle-fusing ATPase	NSF
Mitochondrial 2-oxoglutarate/malate carrier protein	SLC25A11
B-cell CLL/lymphoma 7 protein family member C	BCL7C
Gem-associated protein 4	GEMIN4
Segment polarity protein dishevelled homolog DVL-2	DVL2
Neuralized-like protein 4	NEURL4
Eukaryotic translation initiation factor 5A;Eukaryotic translation initiation factor 5A-1;Eukaryotic translation initiation factor 5A-1-like;Eukaryotic translation initiation factor 5A-2	EIF5A;EIF5AL1;EIF5A2
Protein FAM64A	FAM64A
LisH domain-containing protein FOPNL	FOPNL
Ankyrin-2	ANK2
Zinc finger protein ubi-d4	DPF2
Afadin	MLLT4
Proteasome-associated protein ECM29 homolog	KIAA0368;ECM29
Tropomyosin alpha-3 chain	TPM3
Centrosomal protein of 290 kDa	CEP290
Protein transport protein Sec16A	SEC16A
Cytosolic carboxypeptidase 1	AGTPBP1
Probable fibrosin-1	FBRS
Serine/arginine-rich splicing factor 2	SRSF2
RNA-binding protein 7	RBM7
Luc7-like protein 3	LUC7L3
Fructose-bisphosphate aldolase;Fructose-bisphosphate aldolase A	ALDOA
Prohibitin-2	PHB2
Peptidyl-tRNA hydrolase 2, mitochondrial	PTRH2
Coiled-coil domain-containing protein 12	CCDC12
Rho GDP-dissociation inhibitor 1	ARHGDIA
F-box/LRR-repeat protein 20	FBXL20
Ribosomal protein L19;60S ribosomal protein L19	RPL19
Serine/arginine-rich splicing factor 1	SRSF1
Calcium homeostasis endoplasmic reticulum protein	CHERP
28S ribosomal protein S23, mitochondrial	MRPS23
28S ribosomal protein S7, mitochondrial	MRPS7
60S ribosomal protein L18	RPL18
Polycomb protein SUZ12	SUZ12
YTH domain-containing protein 1	YTHDC1
Fatty aldehyde dehydrogenase	ALDH3A2
Non-specific protein-tyrosine kinase;Tyrosine-protein kinase Yes	YES1
Vascular endothelial zinc finger 1	VEZF1
MICOS complex subunit MIC25	CHCHD6
Clustered mitochondria protein homolog	CLUH
HEAT repeat-containing protein 6	HEATR6
E3 ubiquitin-protein ligase RNF126	RNF126
Lon protease homolog, mitochondrial	LONP1
Kinetochore protein Spc24	SPC24
AP-1 complex subunit mu-1	AP1M1
Histone H3;Histone H3.3	H3F3B;H3F3A
40S ribosomal protein S15	RPS15
RNA-binding protein 42	RBM42
Cartilage intermediate layer protein 2;Cartilage intermediate layer protein 2 C1;Cartilage intermediate layer protein 2 C2	CILP2
Syntaxin-8	STX8
60S ribosomal protein L22	RPL22
39S ribosomal protein L4, mitochondrial	MRPL4
Dedicator of cytokinesis protein 6	DOCK6
Coatomer subunit epsilon	COPE
Amino acid transporter;Neutral amino acid transporter B(0)	SLC1A5
Nuclear pore glycoprotein p62	NUP62
Prostate tumor-overexpressed gene 1 protein	PTOV1
PIH1 domain-containing protein 1	PIH1D1
AP-2 complex subunit sigma	AP2S1
Rho guanine nucleotide exchange factor 1	ARHGEF1
40S ribosomal protein S5;40S ribosomal protein S5, N-terminally processed	RPS5
Unconventional myosin-IXb	MYO9B
Epidermal growth factor receptor substrate 15-like 1	EPS15L1
DNA polymerase;DNA polymerase delta catalytic subunit	POLD1
SURP and G-patch domain-containing protein 2	SUGP2
Alkyldihydroxyacetonephosphate synthase, peroxisomal	AGPS
Kinesin-like protein KIF2A	KIF2A
Unconventional myosin-Ic	MYO1C
Unconventional myosin-Ic	MYO1C
Synaptosomal-associated protein 23;Synaptosomal-associated protein	SNAP23
HCLS1-associated protein X-1	HAX1
AP-3 complex subunit beta-1	AP3B1
26S proteasome non-ATPase regulatory subunit 11	PSMD11
26S proteasome non-ATPase regulatory subunit 12	PSMD12
E3 SUMO-protein ligase CBX4	CBX4
Membrane-associated progesterone receptor component 1	PGRMC1
Transcription elongation factor SPT5	SUPT5H
Huntingtin-interacting protein 1	HIP1
Chloride intracellular channel protein 1	CLIC1
Eukaryotic translation initiation factor 3 subunit F	EIF3F
Cell division cycle 7-related protein kinase	CDC7
Pyruvate dehydrogenase protein X component, mitochondrial	PDHX
Dynactin subunit 6	DCTN6
Importin-5	IPO5
DNA-directed RNA polymerase, mitochondrial	POLRMT
Insulin-like growth factor 2 mRNA-binding protein 3	IGF2BP3
RNA 3-terminal phosphate cyclase	RTCA
Phosphatidylinositol 4-phosphate 3-kinase C2 domain-containing subunit alpha	PIK3C2A
GDNF family receptor alpha-2	GFRA2
Interferon-related developmental regulator 1	IFRD1
Golgi integral membrane protein 4	GOLIM4
Cytochrome c oxidase subunit NDUFA4	NDUFA4
26S proteasome non-ATPase regulatory subunit 14	PSMD14
Zinc finger protein 593	ZNF593
Importin subunit alpha-4	KPNA3
Syntenin-1	SDCBP
Syntenin-1	SDCBP
U3 small nucleolar ribonucleoprotein protein MPP10	MPHOSPH10
Nucleolar protein 56	NOP56
Importin subunit alpha-3	KPNA4
Serine/threonine-protein phosphatase 6 catalytic subunit;Serine/threonine-protein phosphatase 6 catalytic subunit, N-terminally processed	PPP6C
Lipid phosphate phosphohydrolase 1	PPAP2A
Lipid phosphate phosphohydrolase 3	PPAP2B
TRAF-type zinc finger domain-containing protein 1	TRAFD1
Citron Rho-interacting kinase	CIT
AP-3 complex subunit delta-1	AP3D1
Actin-binding LIM protein 1	ABLIM1
Putative segment polarity protein dishevelled homolog DVL1P1;Segment polarity protein dishevelled homolog DVL-1	DVL1P1;DVL1
Chromodomain-helicase-DNA-binding protein 1	CHD1
Chromodomain-helicase-DNA-binding protein 2	CHD2
Protein arginine N-methyltransferase 5;Protein arginine N-methyltransferase 5, N-terminally processed	PRMT5
Transcription elongation regulator 1	TCERG1
DNA-directed RNA polymerase III subunit RPC1	POLR3A
Proteasome subunit alpha type-7;Proteasome subunit alpha type-7-like	PSMA7;PSMA8
Secretory carrier-associated membrane protein 3	SCAMP3
Microsomal glutathione S-transferase 3	MGST3
PDZ domain-containing protein GIPC1	GIPC1
Histone acetyltransferase type B catalytic subunit	HAT1
Phospholipase D2	PLD2
Myosin regulatory light chain 12B	MYL12B
Protein phosphatase 1 regulatory subunit 12A	PPP1R12A
Cyclin-G-associated kinase	GAK
Exportin-1	XPO1
Spectrin beta chain, non-erythrocytic 2	SPTBN2
Plexin-B2	PLXNB2
U2 snRNP-associated SURP motif-containing protein	U2SURP
Histone-lysine N-methyltransferase SETD1A	SETD1A
Uncharacterized protein KIAA0355	KIAA0355
Serine/threonine-protein phosphatase 6 regulatory ankyrin repeat subunit A	ANKRD28
Rho guanine nucleotide exchange factor 11	ARHGEF11
Actin-related protein 2/3 complex subunit 2	ARPC2
Actin-related protein 2/3 complex subunit 3	ARPC3
WD repeat-containing protein 46	WDR46
NF-kappa-B-repressing factor	NKRF
28S ribosomal protein S12, mitochondrial	MRPS12
Surfeit locus protein 4	SURF4
Serine palmitoyltransferase 1	SPTLC1
UDP-N-acetylglucosamine--peptide N-acetylglucosaminyltransferase 110 kDa subunit	OGT
Protein phosphatase 1G	PPM1G
Phosphatidylinositol 3,4,5-trisphosphate 5-phosphatase 2	INPPL1
Eukaryotic translation initiation factor 3 subunit D	EIF3D
Histone deacetylase 3	HDAC3
Nuclear valosin-containing protein-like	NVL
Importin-8	IPO8
Syntaxin-7	STX7
Multidrug resistance-associated protein 4	ABCC4
DNA-directed RNA polymerase I subunit RPA34	CD3EAP
Prolyl 4-hydroxylase subunit alpha-2	P4HA2
Nucleoporin-like protein 2	NUPL2
Actin-related protein 2/3 complex subunit 5	ARPC5
Pre-mRNA-splicing factor ATP-dependent RNA helicase DHX15	DHX15
TELO2-interacting protein 1 homolog	TTI1
Ribosomal RNA-processing protein 8	RRP8
E3 ubiquitin-protein ligase Praja-2	PJA2
Signal-induced proliferation-associated 1-like protein 1	SIPA1L1
U4/U6 small nuclear ribonucleoprotein Prp4	PRPF4
Cytoplasmic dynein 1 light intermediate chain 2	DYNC1LI2
26S proteasome non-ATPase regulatory subunit 3	PSMD3
RNA binding protein fox-1 homolog 2;RNA binding protein fox-1 homolog;RNA binding protein fox-1 homolog 1	RBFOX2;RBFOX1
Centromere/kinetochore protein zw10 homolog	ZW10
U4/U6.U5 tri-snRNP-associated protein 1	SART1
Death-associated protein kinase 3	DAPK3
Heat shock 70 kDa protein 12A	HSPA12A
Centriolar coiled-coil protein of 110 kDa	CCP110
Eukaryotic translation elongation factor 1 epsilon-1	EEF1E1;EEF1E1-BLOC1S5
RNA-binding protein Musashi homolog 1	MSI1
Heterogeneous nuclear ribonucleoprotein R	HNRNPR
U4/U6 small nuclear ribonucleoprotein Prp3	PRPF3
Acidic fibroblast growth factor intracellular-binding protein	FIBP
Peptidyl-prolyl cis-trans isomerase H;Peptidyl-prolyl cis-trans isomerase	PPIH
Krueppel-like factor 4	KLF4
Band 4.1-like protein 2	EPB41L2
Ragulator complex protein LAMTOR5	LAMTOR5
Exportin-T	XPOT
Charged multivesicular body protein 2a	CHMP2A
Pleiotropic regulator 1	PLRG1
Protein regulator of cytokinesis 1	PRC1
Mitotic checkpoint protein BUB3	BUB3
Alpha-actinin-4	ACTN4
Probable 18S rRNA (guanine-N(7))-methyltransferase	WBSCR22
HIV Tat-specific factor 1	HTATSF1
AP-1 complex subunit gamma-1	AP1G1
Asparagine--tRNA ligase, cytoplasmic	NARS
Speckle-type POZ protein	SPOP
Cleavage and polyadenylation specificity factor subunit 5	NUDT21
Striatin	STRN
U3 small nucleolar RNA-interacting protein 2	RRP9
Protein SCO2 homolog, mitochondrial	SCO2
A-kinase anchor protein 8	AKAP8
Putative adenosylhomocysteinase 2	AHCYL1
Double-strand-break repair protein rad21 homolog	RAD21
Mitochondrial import inner membrane translocase subunit Tim8 A	TIMM8A
Putative pre-mRNA-splicing factor ATP-dependent RNA helicase DHX16	DHX16
Protein phosphatase 1 regulatory subunit 12B	PPP1R12B
Mediator of RNA polymerase II transcription subunit 14	MED14
Protocadherin-7	PCDH7
SWI/SNF-related matrix-associated actin-dependent regulator of chromatin subfamily A member 5	SMARCA5
Nucleolar pre-ribosomal-associated protein 1	URB1
Signal-induced proliferation-associated 1-like protein 3	SIPA1L3
Intron-binding protein aquarius	AQR
Germinal-center associated nuclear protein	MCM3AP
Lysine-specific histone demethylase 1A	KDM1A
TBC1 domain family member 4	TBC1D4
Sorting nexin-3	SNX3
Heterogeneous nuclear ribonucleoprotein Q	SYNCRIP
Pre-mRNA-processing factor 17	CDC40
Nuclear export mediator factor NEMF	NEMF
Eukaryotic translation initiation factor 4E type 2	EIF4E2
High affinity cAMP-specific and IBMX-insensitive 3,5-cyclic phosphodiesterase 8A	PDE8A
Importin subunit alpha-7	KPNA6
Catenin delta-1	CTNND1
Sorting nexin-2	SNX2
General vesicular transport factor p115	USO1
28S ribosomal protein S14, mitochondrial	MRPS14
Target of Myb protein 1	TOM1
H/ACA ribonucleoprotein complex subunit 4	DKC1
DnaJ homolog subfamily A member 2	DNAJA2
Nibrin	NBN
mRNA-capping enzyme;Polynucleotide 5-triphosphatase;mRNA guanylyltransferase	RNGTT
WD repeat-containing protein 1	WDR1
Protein cordon-bleu	COBL
Copine-3	CPNE3
Autophagy-related protein 13	ATG13
Huntingtin-interacting protein 1-related protein	HIP1R
Lysine-specific demethylase PHF2	PHF2
Zinc finger CCCH domain-containing protein 11A	ZC3H11A
Cullin-associated NEDD8-dissociated protein 2	CAND2
DnaJ homolog subfamily C member 13	DNAJC13
Serine/threonine-protein phosphatase 6 regulatory subunit 2	PPP6R2
DnaJ homolog subfamily B member 6	DNAJB6
NADH dehydrogenase [ubiquinone] iron-sulfur protein 2, mitochondrial	NDUFS2
RNA/RNP complex-1-interacting phosphatase	DUSP11
Programmed cell death protein 6	PDCD6
V-type proton ATPase subunit G 1	ATP6V1G1
Core histone macro-H2A.1;Histone H2A	H2AFY
Filamin-B	FLNB
Peroxisomal membrane protein PEX14	PEX14
Vesicle-trafficking protein SEC22b	SEC22B
Pre-mRNA-processing factor 40 homolog A	PRPF40A
Leucine-rich repeat and calponin homology domain-containing protein 4	LRCH4
Metaxin-2	MTX2
Erlin-1	ERLIN1
Transcription initiation protein SPT3 homolog	SUPT3H
Glypican-4;Secreted glypican-4	GPC4
NADH dehydrogenase [ubiquinone] iron-sulfur protein 3, mitochondrial	NDUFS3
Serine/arginine-rich splicing factor 10	SRSF10
TAF5-like RNA polymerase II p300/CBP-associated factor-associated factor 65 kDa subunit 5L	TAF5L
Polycomb protein EED	EED
Barrier-to-autointegration factor;Barrier-to-autointegration factor, N-terminally processed	BANF1
Splicing factor 3B subunit 1	SF3B1
Cold shock domain-containing protein E1	CSDE1
Syntaxin-11	STX11
Interferon-inducible double-stranded RNA-dependent protein kinase activator A	PRKRA
E3 ubiquitin-protein ligase MYCBP2	MYCBP2
Nucleoplasmin-3	NPM3
GTPase Era, mitochondrial	ERAL1
U5 small nuclear ribonucleoprotein 200 kDa helicase	SNRNP200
Oral-facial-digital syndrome 1 protein	OFD1
Surfeit locus protein 6	SURF6
Small subunit processome component 20 homolog	UTP20
Nuclear pore complex protein Nup155	NUP155
Protein XRP2	RP2
WD repeat and HMG-box DNA-binding protein 1	WDHD1
Calcium-binding mitochondrial carrier protein Aralar1	SLC25A12
Paralemmin-1	PALM
Eukaryotic translation initiation factor 3 subunit G	EIF3G
Eukaryotic translation initiation factor 3 subunit J	EIF3J
Cyclin-K	CCNK
Pre-mRNA-splicing factor SPF27	BCAS2
Dynactin subunit 3	DCTN3
Survival of motor neuron-related-splicing factor 30	SMNDC1
ATP synthase subunit d, mitochondrial	ATP5H
Flotillin-1	FLOT1
Ribosomal L1 domain-containing protein 1	RSL1D1
Probable cytosolic iron-sulfur protein assembly protein CIAO1	CIAO1
Signal recognition particle subunit SRP72	SRP72
ATP-dependent DNA helicase Q4	RECQL4
Metastasis-associated protein MTA2	MTA2
Slit homolog 2 protein;Slit homolog 2 protein N-product;Slit homolog 2 protein C-product	SLIT2
E3 ubiquitin-protein ligase listerin	LTN1
Unconventional myosin-Id	MYO1D
STAGA complex 65 subunit gamma	SUPT7L
E3 UFM1-protein ligase 1	UFL1
FERM, RhoGEF and pleckstrin domain-containing protein 2	FARP2
Erlin-2	ERLIN2
Pre-mRNA-processing factor 6	PRPF6
Endonuclease domain-containing 1 protein	ENDOD1
HAUS augmin-like complex subunit 5	HAUS5
Protein SOGA1;N-terminal form;C-terminal 80 kDa form	SOGA1
Ubiquitin carboxyl-terminal hydrolase 19;Ubiquitin carboxyl-terminal hydrolase	USP19
AP-2 complex subunit alpha-2	AP2A2
Ribonuclease P protein subunit p14	RPP14
E3 ubiquitin-protein ligase UBR5	UBR5
Splicing factor, arginine/serine-rich 15	SCAF4
Elongator complex protein 1	IKBKAP
NADH dehydrogenase [ubiquinone] 1 beta subcomplex subunit 4	NDUFB4
Reticulon-3;Reticulon	RTN3
LETM1 and EF-hand domain-containing protein 1, mitochondrial	LETM1
Kinesin-like protein KIF20A	KIF20A
Histone acetyltransferase KAT7;Histone acetyltransferase	KAT7
Vesicle-associated membrane protein-associated protein B/C	VAPB
SNARE-associated protein Snapin	SNAPIN
Structural maintenance of chromosomes protein 2	SMC2
Zinc finger and BTB domain-containing protein 7A	ZBTB7A
Importin-7	IPO7
Pre-mRNA-splicing factor SLU7	SLU7
CD2 antigen cytoplasmic tail-binding protein 2	CD2BP2
Supervillin	SVIL
Proteasome assembly chaperone 1	PSMG1
Sphingosine-1-phosphate lyase 1	SGPL1
Ribosome biogenesis protein NSA2 homolog	NSA2
Long-chain-fatty-acid--CoA ligase 3;Long-chain-fatty-acid--CoA ligase 4	ACSL3;ACSL4
DNA-directed RNA polymerase I subunit RPA1;DNA-directed RNA polymerase	POLR1A
Pericentrin	PCNT
YEATS domain-containing protein 4	YEATS4
Zinc finger and BTB domain-containing protein 11	ZBTB11
Netrin-1	NTN1
Cleavage and polyadenylation specificity factor subunit 4	CPSF4
Ribonuclease P protein subunit p29	POP4
E3 ubiquitin-protein ligase HERC2	HERC2
Heat shock 70 kDa protein 4L	HSPA4L
Polypyrimidine tract-binding protein 3	PTBP3
AP-2 complex subunit alpha-1	AP2A1
Double-stranded RNA-binding protein Staufen homolog 1	STAU1
BAG family molecular chaperone regulator 2	BAG2
Apoptosis-inducing factor 1, mitochondrial	AIFM1
Protein SGT1	ECD
Reversion-inducing cysteine-rich protein with Kazal motifs	RECK
Methyl-CpG-binding domain protein 3	MBD3
Actin-like protein 6A	ACTL6A
Histone-lysine N-methyltransferase NSD2	WHSC1
L-lactate dehydrogenase A chain	LDHA
Glutamate dehydrogenase 1, mitochondrial;Glutamate dehydrogenase 2, mitochondrial	GLUD1;GLUD2
NADH-cytochrome b5 reductase 3;NADH-cytochrome b5 reductase 3 membrane-bound form;NADH-cytochrome b5 reductase 3 soluble form	CYB5R3
Cytochrome c oxidase subunit 2	MT-CO2
Carbonic anhydrase 2	CA2
Myc proto-oncogene protein	MYC
GTPase HRas;GTPase HRas, N-terminally processed	HRAS
GTPase KRas;GTPase KRas, N-terminally processed	KRAS
Prelamin-A/C;Lamin-A/C	LMNA
Complement C1q subcomponent subunit A	C1QA
Transferrin receptor protein 1;Transferrin receptor protein 1, serum form	TFRC
Ornithine aminotransferase, mitochondrial;Ornithine aminotransferase, hepatic form;Ornithine aminotransferase, renal form	OAT
N-myc proto-oncogene protein	MYCN
Keratin, type II cytoskeletal 1	KRT1
Glyceraldehyde-3-phosphate dehydrogenase	GAPDH
HLA class I histocompatibility antigen, A-3 alpha chain;HLA class I histocompatibility antigen, A-11 alpha chain;HLA class I histocompatibility antigen, A-36 alpha chain;HLA class I histocompatibility antigen, A-1 alpha chain;HLA class I histocompatibility antigen, A-30 alpha chain;HLA class I histocompatibility antigen, A-24 alpha chain;HLA class I histocompatibility antigen, A-23 alpha chain;HL…	HLA-A
Cellular tumor antigen p53	TP53
Heat shock protein beta-1	HSPB1
Dolichyl-diphosphooligosaccharide--protein glycosyltransferase subunit 1	RPN1
Dolichyl-diphosphooligosaccharide--protein glycosyltransferase subunit 2	RPN2
Guanine nucleotide-binding protein G(i) subunit alpha-2	GNAI2
Histone H2A type 3;Histone H2A type 1-B/E	HIST3H2A;HIST1H2AB
Sodium/potassium-transporting ATPase subunit alpha-1	ATP1A1
Arginase-1	ARG1
ADP/ATP translocase 2;ADP/ATP translocase 2, N-terminally processed	SLC25A5
Eukaryotic translation initiation factor 2 subunit 1	EIF2S1
60S acidic ribosomal protein P1	RPLP1
60S acidic ribosomal protein P2	RPLP2
60S acidic ribosomal protein P0;60S acidic ribosomal protein P0-like	RPLP0;RPLP0P6
Lupus La protein	SSB
Keratin, type I cytoskeletal 18	KRT18
Tyrosine-protein kinase Fyn	FYN
Gelsolin	GSN
ATP synthase subunit beta, mitochondrial;ATP synthase subunit beta	ATP5B
Alpha-enolase	ENO1
Nucleophosmin	NPM1
Isoform 2 of Tropomyosin alpha-3 chain	TPM3;DKFZp686J1372
L-lactate dehydrogenase B chain;L-lactate dehydrogenase	LDHB
Neurofilament light polypeptide	NEFL
Major centromere autoantigen B	CENPB
Protein disulfide-isomerase	P4HB
Histone H1.0;Histone H1.0, N-terminally processed	H1F0
Annexin A2;Annexin;Putative annexin A2-like protein	ANXA2;ANXA2P2
Calpain-1 catalytic subunit	CAPN1
Tubulin beta chain	TUBB
Profilin-1	PFN1
Bifunctional glutamate/proline--tRNA ligase;Glutamate--tRNA ligase;Proline--tRNA ligase	EPRS
Heat shock protein HSP 90-alpha	HSP90AA1
Tyrosine-protein kinase Lyn	LYN
Annexin A6;Annexin	ANXA6
Multidrug resistance protein 1	ABCB1
Heat shock protein HSP 90-beta	HSP90AB1
Signal recognition particle receptor subunit alpha	SRPR
Asparagine synthetase [glutamine-hydrolyzing]	ASNS
U2 small nuclear ribonucleoprotein B	SNRPB2
Melanotransferrin	MFI2
U1 small nuclear ribonucleoprotein 70 kDa	SNRNP70
Vimentin	VIM
Guanine nucleotide-binding protein G(k) subunit alpha	GNAI3
Annexin A5;Annexin	ANXA5
U1 small nuclear ribonucleoprotein A	SNRPA
Signal recognition particle 19 kDa protein	SRP19
Glutathione S-transferase P	GSTP1
Isoform 3 of Tropomyosin alpha-1 chain	TPM1;Isoform
Clathrin light chain A	CLTA
Clathrin light chain B	CLTB
Annexin A4;Annexin	ANXA4
Dihydrolipoyl dehydrogenase, mitochondrial;Dihydrolipoyl dehydrogenase	DLD
U2 small nuclear ribonucleoprotein A	SNRPA1
Cytochrome c oxidase subunit 6C	COX6C
Poly [ADP-ribose] polymerase 1	PARP1
Histone H2A.V;Histone H2A.Z;Histone H2A	H2AFV;H2AFZ
TCF3 fusion partner	TFPT
F-box/SPRY domain-containing protein 1	FBXO45
CDGSH iron-sulfur domain-containing protein 3, mitochondrial	CISD3
POTE ankyrin domain family member J	POTEJ
Splicing factor U2AF 35 kDa subunit	U2AF1
DNA-directed RNA polymerases I and III subunit RPAC2	POLR1D
Ras-related protein Rap-2a	RAP2A
60 kDa SS-A/Ro ribonucleoprotein	TROVE2
Histone H1.4	HIST1H1E
Dihydrolipoyllysine-residue acetyltransferase component of pyruvate dehydrogenase complex, mitochondrial;Acetyltransferase component of pyruvate dehydrogenase complex	DLAT
Receptor-type tyrosine-protein phosphatase F	PTPRF
Thioredoxin	TXN
Cytochrome c oxidase subunit 5B, mitochondrial	COX5B
cAMP-dependent protein kinase type I-alpha regulatory subunit;cAMP-dependent protein kinase type I-alpha regulatory subunit, N-terminally processed	PRKAR1A
60 kDa heat shock protein, mitochondrial	HSPD1
78 kDa glucose-regulated protein	HSPA5
Heat shock cognate 71 kDa protein	HSPA8
Solute carrier family 2, facilitated glucose transporter member 1	SLC2A1
Protein 4.1	EPB41
Uridine 5-monophosphate synthase;Orotate phosphoribosyltransferase;Orotidine 5-phosphate decarboxylase	UMPS
Pyruvate dehydrogenase E1 component subunit beta, mitochondrial	PDHB
Ras-related protein Ral-A	RALA
Ras-related protein Ral-B	RALB
Breakpoint cluster region protein	BCR
Lysosome-associated membrane glycoprotein 1	LAMP1
DNA topoisomerase 1	TOP1
DNA topoisomerase 2-alpha	TOP2A
Steroid hormone receptor ERR1	ESRRA
Cation-independent mannose-6-phosphate receptor	IGF2R
Polyadenylate-binding protein 1;Polyadenylate-binding protein;Polyadenylate-binding protein 3	PABPC1;PABPC3
Proliferating cell nuclear antigen	PCNA
ADP/ATP translocase 3;ADP/ATP translocase 3, N-terminally processed;ADP/ATP translocase 1	SLC25A6;SLC25A4
Nucleoprotein TPR	TPR
Creatine kinase B-type	CKB
Creatine kinase U-type, mitochondrial	CKMT1A;CKMT1B
Alpha-actinin-1	ACTN1
Proto-oncogene tyrosine-protein kinase Src	SRC
X-ray repair cross-complementing protein 6	XRCC6
X-ray repair cross-complementing protein 5	XRCC5
Cytochrome c oxidase subunit 4 isoform 1, mitochondrial	COX4I1
Ribonuclease inhibitor	RNH1
Elongation factor 2	EEF2
Prolyl 4-hydroxylase subunit alpha-1	P4HA1
Plastin-3	PLS3
Electron transfer flavoprotein subunit alpha, mitochondrial	ETFA
cAMP-dependent protein kinase type II-alpha regulatory subunit	PRKAR2A
Zinc finger protein RFP	TRIM27
Carboxypeptidase M	CPM
Pyruvate kinase PKM;Pyruvate kinase	PKM
Endoplasmin	HSP90B1
Myosin light chain 6B	MYL6B
Small nuclear ribonucleoprotein-associated proteins B and B;Small nuclear ribonucleoprotein-associated protein N	SNRPB;SNRPN
Heterogeneous nuclear ribonucleoprotein L	HNRNPL
Aspartate--tRNA ligase, cytoplasmic	DARS
Junction plakoglobin	JUP
Phosphoglycerate mutase 2;Phosphoglycerate mutase 1	PGAM2;PGAM1
Folate receptor alpha	FOLR1
40S ribosomal protein S2	RPS2
Desmoplakin	DSP
Replication protein A 32 kDa subunit	RPA2
CD44 antigen	CD44
Histone H1.3	HIST1H1D
Histone H1.2	HIST1H1C
Sarcoplasmic/endoplasmic reticulum calcium ATPase 2	ATP2A2
Y-box-binding protein 3	YBX3
Zinc finger protein 24	ZNF24
Rho-related GTP-binding protein RhoQ	RHOQ
Protein kinase C alpha type	PRKCA
Gap junction alpha-1 protein	GJA1
cAMP-dependent protein kinase catalytic subunit alpha	PRKACA;KIN27
Neuromodulin	GAP43
CTP synthase 1	CTPS1
Probable ATP-dependent RNA helicase DDX5	DDX5
ATP-dependent 6-phosphofructokinase, liver type	PFKL
T-complex protein 1 subunit alpha	TCP1
60S ribosomal protein L35a	RPL35A
60S ribosomal protein L7	RPL7
Protein SON	SON
Syndecan-1	SDC1
DNA repair protein XRCC1	XRCC1
Cadherin-2	CDH2
Guanine nucleotide-binding protein G(z) subunit alpha	GNAZ
Nucleolin	NCL
Hexokinase-1	HK1
DNA-directed RNA polymerase II subunit RPB3	POLR2C
E3 ubiquitin-protein ligase TRIM21	TRIM21
Casein kinase II subunit alpha	CSNK2A2
Annexin A7	ANXA7
TATA-box-binding protein;TATA box-binding protein-like protein 2	TBP;TBPL2
Transcription factor BTF3	BTF3
Ras-related protein Rab-6A;Ras-related protein Rab-6B;Ras-related protein Rab-39A	RAB6A;RAB6B;RAB39A
Proteasome subunit beta type-1	PSMB1
Cytochrome c oxidase subunit 5A, mitochondrial	COX5A
Lamin-B1	LMNB1
Homeobox protein Hox-A5	HOXA5
Ephrin-A1;Ephrin-A1, secreted form	EFNA1
V-type proton ATPase subunit B, brain isoform	ATP6V1B2
V-type proton ATPase subunit C 1	ATP6V1C1
Filamin-A	FLNA
Voltage-dependent anion-selective channel protein 1	VDAC1
Succinate dehydrogenase [ubiquinone] iron-sulfur subunit, mitochondrial	SDHB
rRNA 2-O-methyltransferase fibrillarin	FBL
Trifunctional purine biosynthetic protein adenosine-3;Phosphoribosylamine--glycine ligase;Phosphoribosylformylglycinamidine cyclo-ligase;Phosphoribosylglycinamide formyltransferase	GART
Ubiquitin-like modifier-activating enzyme 1	UBA1
Nucleoside diphosphate kinase;Nucleoside diphosphate kinase B;Putative nucleoside diphosphate kinase	NME1-NME2;NME2;NME1;NME2P1
Heterogeneous nuclear ribonucleoproteins A2/B1	HNRNPA2B1
cAMP-dependent protein kinase catalytic subunit beta	PRKACB
Cytochrome b-c1 complex subunit 2, mitochondrial	UQCRC2
Splicing factor, proline- and glutamine-rich	SFPQ
Tubulin gamma-1 chain;Tubulin gamma-2 chain	TUBG1;TUBG2
40S ribosomal protein S3	RPS3
Receptor-type tyrosine-protein phosphatase gamma	PTPRG
Adenosylhomocysteinase	AHCY
Histone H2B type 2-E;Histone H2B type 1-B;Histone H2B type 1-O;Histone H2B type 1-J	HIST2H2BE;HIST1H2BB;HIST1H2BO;HIST1H2BJ
Cofilin-1	CFL1
COUP transcription factor 2;COUP transcription factor 1	NR2F2;NR2F1
Elongation factor 1-beta	EEF1B2
ATP synthase F(0) complex subunit B1, mitochondrial	ATP5F1
Acetyl-CoA acetyltransferase, mitochondrial	ACAT1
DNA-directed RNA polymerase II subunit RPB1	POLR2A
Adenomatous polyposis coli protein	APC
DNA replication licensing factor MCM3	MCM3
40S ribosomal protein S12	RPS12
Transcriptional repressor protein YY1	YY1
DnaJ homolog subfamily B member 1	DNAJB1
ATP synthase subunit alpha, mitochondrial	ATP5A1
Proteasome subunit alpha type-1	PSMA1
Proteasome subunit alpha type-3	PSMA3
Proteasome subunit alpha type-4;Proteasome subunit alpha type	PSMA4
Probable ATP-dependent RNA helicase DDX6	DDX6
DNA (cytosine-5)-methyltransferase 1	DNMT1
Splicing factor U2AF 65 kDa subunit	U2AF2
60S ribosomal protein L13	RPL13
Polypyrimidine tract-binding protein 1	PTBP1
Threonine--tRNA ligase, cytoplasmic	TARS
Valine--tRNA ligase	VARS
Elongation factor 1-gamma	EEF1G
Ciliary neurotrophic factor receptor subunit alpha	CNTFR
Erythrocyte band 7 integral membrane protein	STOM
14-3-3 protein theta	YWHAQ
MAP/microtubule affinity-regulating kinase 3	MARK3
V-type proton ATPase 16 kDa proteolipid subunit	ATP6V0C
60S ribosomal protein L10	RPL10
Replication protein A 70 kDa DNA-binding subunit;Replication protein A 70 kDa DNA-binding subunit, N-terminally processed	RPA1
Calnexin	CANX
Proteasome subunit beta type-4	PSMB4
Proteasome subunit beta type-6;Proteasome subunit beta type	PSMB6
Proteasome subunit beta type-5	PSMB5
ATP-binding cassette sub-family D member 3	ABCD3
Tropomodulin-1	TMOD1
NADH-ubiquinone oxidoreductase 75 kDa subunit, mitochondrial	NDUFS1
Ephrin type-A receptor 2	EPHA2
DNA-3-methyladenine glycosylase	MPG
Non-receptor tyrosine-protein kinase TYK2;Tyrosine-protein kinase	TYK2
Myristoylated alanine-rich C-kinase substrate	MARCKS
Guanine nucleotide-binding protein subunit alpha-11	GNA11
Thioredoxin-dependent peroxide reductase, mitochondrial	PRDX3
60S ribosomal protein L12	RPL12
Protein disulfide-isomerase A3	PDIA3
Serine/threonine-protein phosphatase 2A 65 kDa regulatory subunit A alpha isoform	PPP2R1A
Glycylpeptide N-tetradecanoyltransferase 1	NMT1
Succinate dehydrogenase [ubiquinone] flavoprotein subunit, mitochondrial	SDHA
cAMP-dependent protein kinase type II-beta regulatory subunit	PRKAR2B
Carbamoyl-phosphate synthase [ammonia], mitochondrial	CPS1
DnaJ homolog subfamily A member 1	DNAJA1
Bifunctional purine biosynthesis protein PURH;Phosphoribosylaminoimidazolecarboxamide formyltransferase;IMP cyclohydrolase	ATIC
Heterogeneous nuclear ribonucleoprotein H3	HNRNPH3
14-3-3 protein beta/alpha;14-3-3 protein beta/alpha, N-terminally processed	YWHAB
Stress-induced-phosphoprotein 1	STIP1
Protein S100-A11;Protein S100-A11, N-terminally processed	S100A11
Peroxiredoxin-2	PRDX2
Pyrroline-5-carboxylate reductase 1, mitochondrial	PYCR1
60S ribosomal protein L9	RPL9
Kinesin-1 heavy chain	KIF5B
DNA replication licensing factor MCM4	MCM4
DNA replication licensing factor MCM5;DNA helicase	MCM5
DNA replication licensing factor MCM7	MCM7
Serine hydroxymethyltransferase, mitochondrial;Serine hydroxymethyltransferase	SHMT2
Heat shock 70 kDa protein 4	HSPA4
Catenin alpha-1	CTNNA1
Prohibitin	PHB
Merlin	NF2
Replication factor C subunit 4	RFC4
Replication factor C subunit 2	RFC2
Replication factor C subunit 1	RFC1
General transcription factor IIF subunit 1	GTF2F1
Myosin-9	MYH9
Myosin-10	MYH10
Coatomer subunit beta	COPB2
Alpha-adducin	ADD1
Beta-adducin	ADD2
Basigin	BSG
Metalloproteinase inhibitor 3	TIMP3
Nuclear pore complex protein Nup214	NUP214
Protein DEK	DEK
26S protease regulatory subunit 7	PSMC2
Gap junction gamma-1 protein	DKFZp686P0738;GJC1
ATP synthase subunit gamma, mitochondrial	ATP5C1
V-type proton ATPase subunit E 1	ATP6V1E1
60S ribosomal protein L4	RPL4
Serine/threonine-protein phosphatase PP1-gamma catalytic subunit;Serine/threonine-protein phosphatase	PPP1CC
Guanine nucleotide-binding protein-like 1	GNL1
DNA-directed RNA polymerase II subunit RPB9	POLR2I
Dihydrolipoyllysine-residue succinyltransferase component of 2-oxoglutarate dehydrogenase complex, mitochondrial	DLST
Signal recognition particle 14 kDa protein	SRP14
Transgelin-2	TAGLN2
Transaldolase	TALDO1
Electron transfer flavoprotein subunit beta	ETFB
RNA-binding motif protein, X chromosome;RNA-binding motif protein, X chromosome, N-terminally processed	RBMX
Coilin	COIL
Vitamin K-dependent gamma-carboxylase	GGCX
V-type proton ATPase catalytic subunit A	ATP6V1A
Stress-70 protein, mitochondrial	HSPA9
Eukaryotic initiation factor 4A-III;Eukaryotic initiation factor 4A-III, N-terminally processed	EIF4A3
DNA-binding protein SMUBP-2	IGHMBP2
40S ribosomal protein S19	RPS19
60S ribosomal protein L3	RPL3
Alpha-taxilin	TXLNA
T-complex protein 1 subunit zeta	CCT6A
60S ribosomal protein L13a	RPL13A;RPL13a
Peroxisomal biogenesis factor 19	PEX19
Malate dehydrogenase, mitochondrial;Malate dehydrogenase	MDH2
Replication factor C subunit 5	RFC5
Replication factor C subunit 3	RFC3
Eukaryotic translation initiation factor 2 subunit 3;Putative eukaryotic translation initiation factor 2 subunit 3-like protein	EIF2S3;EIF2S3L
Centrin-2	CETN2
Peripherin	PRPH
Protein BUD31 homolog	BUD31
Tyrosine-protein kinase CSK	CSK
Glycine--tRNA ligase	GARS
Isoleucine--tRNA ligase, cytoplasmic	IARS
Beta-centractin	ACTR1B
Lamina-associated polypeptide 2, isoform alpha;Thymopoietin;Thymopentin	TMPO
Lamina-associated polypeptide 2, isoforms beta/gamma;Thymopoietin;Thymopentin	TMPO
Superkiller viralicidic activity 2-like 2	SKIV2L2
Serine/threonine-protein kinase mTOR	MTOR
Phosphatidylinositol 4-kinase alpha	PI4KA
Epidermal growth factor receptor substrate 15	EPS15
40S ribosomal protein S27	RPS27
Probable helicase with zinc finger domain	HELZ
Condensin-2 complex subunit D3	NCAPD3
RNA-binding protein 34	RBM34
Leucine-rich PPR motif-containing protein, mitochondrial	LRPPRC
60S ribosomal protein L35	RPL35
Platelet-activating factor acetylhydrolase IB subunit alpha	PAFAH1B1
Cell surface glycoprotein MUC18	MCAM
DNA mismatch repair protein Msh2	MSH2
Translocon-associated protein subunit alpha	SSR1
26S protease regulatory subunit 6B	PSMC4
Elongation factor Ts, mitochondrial;Elongation factor Ts	TSFM
Voltage-dependent anion-selective channel protein 2	VDAC2
Chromobox protein homolog 5	CBX5
Antigen KI-67	MKI67
Ran GTPase-activating protein 1	RANGAP1
ATP-dependent DNA helicase Q1	RECQL
Probable 28S rRNA (cytosine(4447)-C(5))-methyltransferase	NOP2
Lys-63-specific deubiquitinase BRCC36	BRCC3
60S ribosomal protein L27a	RPL27A
60S ribosomal protein L5	RPL5
60S ribosomal protein L21	RPL21
60S ribosomal protein L28	RPL28
40S ribosomal protein S10	RPS10;RPS10-NUDT3
Microtubule-associated protein 1B;MAP1B heavy chain;MAP1 light chain LC1	MAP1B
Utrophin	UTRN
Ras GTPase-activating-like protein IQGAP1	IQGAP1
Dolichyl-diphosphooligosaccharide--protein glycosyltransferase subunit STT3A	STT3A
F-actin-capping protein subunit alpha-2	CAPZA2
F-actin-capping protein subunit beta	CAPZB
Glutamine--tRNA ligase	QARS
60S ribosomal protein L29	RPL29
ATP synthase subunit O, mitochondrial	ATP5O
Coatomer subunit delta	ARCN1
26S proteasome non-ATPase regulatory subunit 8	PSMD8
Protein PRRC2A	PRRC2A
Phosphatidylserine synthase 1	PTDSS1
Casein kinase I isoform alpha;Casein kinase I isoform alpha-like	CSNK1A1;CSNK1A1L
MARCKS-related protein	MARCKSL1
Deoxyribonuclease-1-like 1	DNASE1L1
60S ribosomal protein L34	RPL34
Protein ERGIC-53	LMAN1
Nuclear autoantigenic sperm protein	NASP
Fatty acid synthase;[Acyl-carrier-protein] S-acetyltransferase;[Acyl-carrier-protein] S-malonyltransferase;3-oxoacyl-[acyl-carrier-protein] synthase;3-oxoacyl-[acyl-carrier-protein] reductase;3-hydroxyacyl-[acyl-carrier-protein] dehydratase;Enoyl-[acyl-carrier-protein] reductase;Oleoyl-[acyl-carrier-protein] hydrolase	FASN
T-complex protein 1 subunit gamma	CCT3
Elongation factor Tu, mitochondrial	TUFM
Centromere protein F	CENPF
Signal recognition particle 9 kDa protein	SRP9
Alanine--tRNA ligase, cytoplasmic	AARS
Serine--tRNA ligase, cytoplasmic	SARS
Casein kinase I isoform epsilon	CSNK1E
Proteasome subunit beta type-2	PSMB2
DNA replication licensing factor MCM2	MCM2
YLP motif-containing protein 1	YLPM1
Transmembrane emp24 domain-containing protein 10	TMED10
RNA-binding protein 25	RBM25
Dual specificity protein kinase CLK3	CLK3
Translation initiation factor eIF-2B subunit beta	EIF2B2
Nuclear pore complex protein Nup153	NUP153
E3 SUMO-protein ligase RanBP2	RANBP2
Regulator of G-protein signaling 19	RGS19
DNA ligase 3	LIG3
Double-strand break repair protein MRE11A	MRE11A
Guanine nucleotide-binding protein G(q) subunit alpha	GNAQ
Emerin	EMD
Sulfate transporter	SLC26A2
Hsc70-interacting protein;Putative protein FAM10A5;Putative protein FAM10A4	ST13;ST13P5;ST13P4
Dynamin-2	DNM2
Cyclin-dependent kinase 9	CDK9
60S ribosomal protein L14	RPL14
T-complex protein 1 subunit theta	CCT8
T-complex protein 1 subunit delta	CCT4
Annexin A11	ANXA11
Fragile X mental retardation syndrome-related protein 1	FXR1
Fragile X mental retardation syndrome-related protein 2	FXR2
Ras-related protein Rab-5C	RAB5C
Ras-related protein Rab-7a	RAB7A
28S ribosomal protein S29, mitochondrial	DAP3
Probable global transcription activator SNF2L2	SMARCA2
Translocon-associated protein subunit delta	SSR4
B-cell receptor-associated protein 31	BCAP31
Methyl-CpG-binding protein 2	MECP2
Caveolin-2;Caveolin	CAV2
26S proteasome non-ATPase regulatory subunit 7	PSMD7
NADH dehydrogenase [ubiquinone] 1 alpha subcomplex subunit 8	NDUFA8
Heterogeneous nuclear ribonucleoprotein A3	HNRNPA3
Heterogeneous nuclear ribonucleoprotein M	HNRNPM
Importin subunit alpha-1	KPNA2
Importin subunit alpha-5;Importin subunit alpha-5, N-terminally processed	KPNA1
Nuclear cap-binding protein subunit 2	NCBP2
DNA-directed RNA polymerase II subunit RPB11-a	POLR2J;POLR2J3
Heterogeneous nuclear ribonucleoprotein F;Heterogeneous nuclear ribonucleoprotein F, N-terminally processed	HNRNPF
DNA mismatch repair protein Msh6	MSH6
Kinesin-like protein KIF11	KIF11
RNA-binding protein 5	RBM5
F-actin-capping protein subunit alpha-1	CAPZA1
Nuclear pore complex protein Nup98-Nup96;Nuclear pore complex protein Nup98;Nuclear pore complex protein Nup96	NUP98
Tricarboxylate transport protein, mitochondrial	SLC25A1
Serine/threonine-protein kinase PLK1	PLK1
Death-associated protein kinase 1	DAPK1
ATP-citrate synthase	ACLY
Succinyl-CoA ligase [ADP/GDP-forming] subunit alpha, mitochondrial	SUCLG1
Coatomer subunit beta	COPB1
Coatomer subunit alpha;Xenin;Proxenin	COPA
Monocarboxylate transporter 1	SLC16A1
IST1 homolog	IST1
Activated RNA polymerase II transcriptional coactivator p15	SUB1
Bloom syndrome protein	BLM
Arginine--tRNA ligase, cytoplasmic	RARS
Protein HIRA	HIRA
Voltage-dependent calcium channel subunit alpha-2/delta-1;Voltage-dependent calcium channel subunit alpha-2-1;Voltage-dependent calcium channel subunit delta-1	CACNA2D1
Sodium/potassium-transporting ATPase subunit beta-3	ATP1B3
UV excision repair protein RAD23 homolog B	RAD23B
Growth arrest-specific protein 1	GAS1
Delta-1-pyrroline-5-carboxylate synthase;Glutamate 5-kinase;Gamma-glutamyl phosphate reductase	ALDH18A1
Solute carrier family 12 member 2	SLC12A2
26S proteasome non-ATPase regulatory subunit 4	PSMD4
Exportin-2	CSE1L
Transitional endoplasmic reticulum ATPase	VCP
Microfibrillar-associated protein 1	MFAP1
Trifunctional enzyme subunit beta, mitochondrial;3-ketoacyl-CoA thiolase	HADHB
Double-stranded RNA-specific adenosine deaminase	ADAR
Protein SEC13 homolog	SEC13
NHP2-like protein 1;NHP2-like protein 1, N-terminally processed	NHP2L1
Heterogeneous nuclear ribonucleoprotein H2	HNRNPH2
Eukaryotic translation initiation factor 3 subunit B	EIF3B
Ribosomal RNA processing protein 1 homolog A	RRP1
Methionine--tRNA ligase, cytoplasmic	MARS
Myc-associated zinc finger protein	MAZ
AP-1 complex subunit sigma-2	AP1S2
Eukaryotic translation initiation factor 6	EIF6
C-terminal-binding protein 2	CTBP2
Breast cancer anti-estrogen resistance protein 1	BCAR1
Syntaxin-17	STX17
Transmembrane protein 33	TMEM33
Nuclear pore complex protein Nup107	NUP107
Myeloid leukemia factor 1	MLF1
Histone H2B;Histone H2B type 1-M;Histone H2B type 1-N;Histone H2B type 1-H;Histone H2B type 2-F;Histone H2B type 1-C/E/F/G/I;Histone H2B type 1-D;Histone H2B type 1-K	HIST1H2BN;HIST1H2BM;HIST1H2BH;HIST2H2BF;HIST1H2BC;HIST1H2BD;HIST1H2BK
Triosephosphate isomerase	TPI1
Eukaryotic translation initiation factor 3 subunit E	EIF3E
Protein transport protein Sec61 subunit beta	SEC61B
Ubiquitin-conjugating enzyme E2 G2	UBE2G2
Myosin light polypeptide 6	MYL6
Actin, cytoplasmic 1;Actin, cytoplasmic 1, N-terminally processed	ACTB
Eukaryotic initiation factor 4A-I	EIF4A1
40S ribosomal protein S20	RPS20
Protein S100-A10	S100A10
Cell division control protein 42 homolog	CDC42
Destrin	DSTN
Signal recognition particle 54 kDa protein	SRP54
Ras-related protein Rab-2A	RAB2A
Ras-related protein Rab-14	RAB14
Actin-related protein 3	ACTR3
Actin-related protein 2	ACTR2
Alpha-centractin	ACTR1A
ATP-binding cassette sub-family E member 1	ABCE1
Ras-related protein Rap-2b	RAP2B
Protein max	MAX
40S ribosomal protein S3a	RPS3A
60S ribosomal protein L26	RPL26
Proteasome activator complex subunit 3	PSME3
60S ribosomal protein L15;Ribosomal protein L15	RPL15
60S ribosomal protein L27	RPL27
60S ribosomal protein L37a	RPL37A
Transforming protein RhoA;Rho-related GTP-binding protein RhoC	RHOA;RHOC
60S ribosomal protein L37;Ribosomal protein L37	RPL37
DDB1- and CUL4-associated factor 7	DCAF7
WD repeat-containing protein 5	WDR5
Heterogeneous nuclear ribonucleoprotein K	HNRNPK
14-3-3 protein gamma;14-3-3 protein gamma, N-terminally processed	YWHAG
Ras-related protein R-Ras2	RRAS2
40S ribosomal protein S7	RPS7
Serine/threonine-protein phosphatase PP1-alpha catalytic subunit;Serine/threonine-protein phosphatase	PPP1CA
Serine/threonine-protein phosphatase PP1-beta catalytic subunit;Serine/threonine-protein phosphatase	PPP1CB
Neuronal calcium sensor 1	NCS1
26S protease regulatory subunit 4	PSMC1
26S protease regulatory subunit 8	PSMC5
40S ribosomal protein S8	RPS8
40S ribosomal protein S15a	RPS15A
40S ribosomal protein S16	RPS16
14-3-3 protein epsilon	YWHAE
40S ribosomal protein S23	RPS23
40S ribosomal protein S18	RPS18
40S ribosomal protein S13	RPS13
40S ribosomal protein S11	RPS11
Small nuclear ribonucleoprotein E	SNRPE
Small nuclear ribonucleoprotein F	SNRPF
Small nuclear ribonucleoprotein Sm D1	SNRPD1
Small nuclear ribonucleoprotein Sm D2	SNRPD2
Small nuclear ribonucleoprotein Sm D3	SNRPD3
60S ribosomal protein L7a	RPL7A
Eukaryotic peptide chain release factor subunit 1	ETF1
40S ribosomal protein S4, X isoform	RPS4X
Serine/threonine-protein phosphatase 2A catalytic subunit beta isoform	PPP2CB
Rho-related GTP-binding protein RhoB	RHOB
60S ribosomal protein L23a	RPL23A
40S ribosomal protein S6	RPS6
Histone H4	HIST1H4A
60S ribosomal protein L23	RPL23
Ras-related protein Rap-1A	RAP1A
40S ribosomal protein S24	RPS24
40S ribosomal protein S25	RPS25
40S ribosomal protein S26;Putative 40S ribosomal protein S26-like 1	RPS26;RPS26P11
40S ribosomal protein S28	RPS28
40S ribosomal protein S30	FAU
Guanine nucleotide-binding protein G(I)/G(S)/G(T) subunit beta-1	GNB1
E3 ubiquitin-protein ligase RBX1;E3 ubiquitin-protein ligase RBX1, N-terminally processed	RBX1
Guanine nucleotide-binding protein G(I)/G(S)/G(T) subunit beta-2	GNB2
60S ribosomal protein L30	RPL30
60S ribosomal protein L31	RPL31
60S ribosomal protein L10a	RPL10A
60S ribosomal protein L11	RPL11
60S ribosomal protein L11	RPL11
60S ribosomal protein L8	RPL8
Peptidyl-prolyl cis-trans isomerase A;Peptidyl-prolyl cis-trans isomerase A, N-terminally processed;Peptidyl-prolyl cis-trans isomerase	PPIA
Ubiquitin-40S ribosomal protein S27a;Ubiquitin;40S ribosomal protein S27a	RPS27A
Ubiquitin-60S ribosomal protein L40;Ubiquitin;60S ribosomal protein L40;Polyubiquitin-B;Ubiquitin;Polyubiquitin-C;Ubiquitin	UBA52;UBB;RPS27A;UBC
Transformer-2 protein homolog beta	TRA2B
Ras-related C3 botulinum toxin substrate 1	RAC1
AP-2 complex subunit beta	AP2B1
Guanine nucleotide-binding protein G(s) subunit alpha isoforms short;Guanine nucleotide-binding protein G(s) subunit alpha isoforms XLas	GNAS
Guanine nucleotide-binding protein G(i) subunit alpha-1	GNAI1
14-3-3 protein zeta/delta	YWHAZ
Serine/threonine-protein phosphatase 2A 55 kDa regulatory subunit B alpha isoform	PPP2R2A
Dynein light chain 1, cytoplasmic	DYNLL1
60S ribosomal protein L38	RPL38
Guanine nucleotide-binding protein G(I)/G(S)/G(O) subunit gamma-5	GNG5
40S ribosomal protein S21	RPS21
Guanine nucleotide-binding protein subunit beta-2-like 1;Guanine nucleotide-binding protein subunit beta-2-like 1, N-terminally processed	GNB2L1
Actin, cytoplasmic 2;Actin, cytoplasmic 2, N-terminally processed	ACTG1
Serine/threonine-protein phosphatase 2A catalytic subunit alpha isoform	PPP2CA
Nuclease-sensitive element-binding protein 1	YBX1
Casein kinase II subunit beta	CSNK2B;CSNK2B-LY6G5B-1181;CSNK2B-LY6G5B--991
Tropomyosin alpha-4 chain	TPM4
Actin, alpha cardiac muscle 1;Actin, alpha skeletal muscle;Actin, aortic smooth muscle;Actin, gamma-enteric smooth muscle	ACTC1;ACTA1;ACTA2;ACTG2
Elongation factor 1-alpha 1;Putative elongation factor 1-alpha-like 3;Elongation factor 1-alpha;Elongation factor 1-alpha 2	EEF1A1;EEF1A1P5;EEF1A2
Tubulin alpha-1B chain	TUBA1B
Tubulin beta-4B chain	TUBB4B
Histone H3.1;Histone H3.1t	HIST1H3A;HIST3H3
Nucleolar protein 14	NOP14
Immunoglobulin-binding protein 1	IGBP1
Ribonuclease P protein subunit p38	RPP38
Ribonuclease P protein subunit p30	RPP30
General transcription factor II-I	GTF2I
SRSF protein kinase 2;SRSF protein kinase 2 N-terminal;SRSF protein kinase 2 C-terminal	SRPK2
T-complex protein 1 subunit beta	CCT2
mRNA export factor	RAE1
Suppression of tumorigenicity 5 protein	ST5
DNA-dependent protein kinase catalytic subunit	PRKDC
Brain acid soluble protein 1	BASP1
28S ribosomal protein S25, mitochondrial	MRPS25
28S ribosomal protein S35, mitochondrial	MRPS35
28S ribosomal protein S5, mitochondrial	MRPS5
28S ribosomal protein S11, mitochondrial	MRPS11
28S ribosomal protein S15, mitochondrial	MRPS15
28S ribosomal protein S9, mitochondrial	MRPS9
Serine beta-lactamase-like protein LACTB, mitochondrial	LACTB
U7 snRNA-associated Sm-like protein LSm11	LSM11
60S ribosomal protein L24	RPL24
Enhancer of rudimentary homolog	ERH
Serine/arginine-rich splicing factor 3	SRSF3
Forkhead box protein K1	FOXK1
Vacuolar fusion protein CCZ1 homolog;Vacuolar fusion protein CCZ1 homolog B	CCZ1;CCZ1B
Disabled homolog 2	DAB2
Basement membrane-specific heparan sulfate proteoglycan core protein;Endorepellin;LG3 peptide	HSPG2
RNA-binding protein 10	RBM10
Transcription factor A, mitochondrial	TFAM
Phosphate carrier protein, mitochondrial	SLC25A3
Cyclin-dependent-like kinase 5	CDK5
Cyclin-dependent kinase 17	CDK17
Cdc42 effector protein 1	CDC42EP1
Heterogeneous nuclear ribonucleoprotein U	HNRNPU
Spectrin beta chain, non-erythrocytic 1	SPTBN1
Spectrin beta chain, non-erythrocytic 1	SPTBN1
Spectrin beta chain, non-erythrocytic 1	SPTBN1
Forkhead box protein K2	FOXK2
Fatty acid-binding protein, epidermal	FABP5
Adenylyl cyclase-associated protein 1;Adenylyl cyclase-associated protein	CAP1
Large neutral amino acids transporter small subunit 1	SLC7A5
Exosome component 10	EXOSC10
OTU domain-containing protein 4	OTUD4
DNA repair protein complementing XP-C cells	XPC
A-kinase anchor protein 17A	AKAP17A
Kinesin-like protein KIF23;Kinesin-like protein	KIF23
Desmoglein-1	DSG1
Desmocollin-2	DSC2
Histone H1.1	HIST1H1A
60S ribosomal protein L18a	RPL18A
Procollagen-lysine,2-oxoglutarate 5-dioxygenase 1	PLOD1
60S ribosomal protein L6	RPL6
DNA topoisomerase 2-beta;DNA topoisomerase 2	TOP2B
A-kinase anchor protein 12	AKAP12
Caveolin-1;Caveolin	CAV1
Lamin-B2	LMNB2
CCAAT/enhancer-binding protein zeta	CEBPZ
Eukaryotic translation initiation factor 4 gamma 1	EIF4G1
Transducin-like enhancer protein 1;Transducin-like enhancer protein 4	TLE1;TLE4
Single-stranded DNA-binding protein, mitochondrial	SSBP1
14-3-3 protein eta	YWHAH
Serine/arginine-rich splicing factor 11	SRSF11
MBT domain-containing protein 1	MBTD1
Exosome complex component RRP45	EXOSC9
E3 ubiquitin-protein ligase RING1	RING1
Fragile X mental retardation protein 1	FMR1
Fragile X mental retardation protein 1	FMR1
Peroxiredoxin-1	PRDX1
Complement component 1 Q subcomponent-binding protein, mitochondrial	C1QBP
Cytoskeleton-associated protein 4	CKAP4
Glutamyl aminopeptidase	ENPEP
KH domain-containing, RNA-binding, signal transduction-associated protein 1	KHDRBS1
DNA polymerase epsilon catalytic subunit A;DNA polymerase	POLE
Serine/arginine-rich splicing factor 4	SRSF4
ATP-dependent RNA helicase A	DHX9
Lactadherin;Lactadherin short form;Medin	MFGE8
FACT complex subunit SSRP1	SSRP1
Protein VAC14 homolog	VAC14
tRNA (cytosine(34)-C(5))-methyltransferase	NSUN2
Histone-binding protein RBBP4	RBBP4
Nuclear cap-binding protein subunit 1	NCBP1
Neuroblast differentiation-associated protein AHNAK	AHNAK
Cingulin-like protein 1	CGNL1
Ragulator complex protein LAMTOR4;Ragulator complex protein LAMTOR4, N-terminally processed	LAMTOR4
Nexilin	NEXN
AP-1 complex subunit beta-1	AP1B1
Cleavage and polyadenylation specificity factor subunit 1	CPSF1
WASH complex subunit strumpellin	KIAA0196
Nuclear pore complex protein Nup160	NUP160
Transducin beta-like protein 3	TBL3
General transcription factor 3C polypeptide 1	GTF3C1
Twinfilin-1	TWF1
Aspartyl/asparaginyl beta-hydroxylase	ASPH
A-kinase anchor protein 13	AKAP13
Nucleosome-remodeling factor subunit BPTF	BPTF
Syntaxin-4	STX4
Contactin-1	CNTN1
Splicing factor, suppressor of white-apricot homolog	SFSWAP
Chromodomain-helicase-DNA-binding protein 3	CHD3
Splicing factor 3A subunit 3	SF3A3
Tripartite motif-containing protein 26	TRIM26
Aminoacyl tRNA synthase complex-interacting multifunctional protein 1;Endothelial monocyte-activating polypeptide 2	AIMP1
Interleukin enhancer-binding factor 3	ILF3
Tyrosine-protein phosphatase non-receptor type 13	PTPN13
Heat shock protein 75 kDa, mitochondrial	TRAP1
TNF receptor-associated factor 2	TRAF2
Ankyrin-3	ANK3
Disks large homolog 1	DLG1
Transcription initiation factor TFIID subunit 10	TAF10
Unconventional myosin-Ie	MYO1E
Cleavage stimulation factor subunit 3	CSTF3
Striatin-3	STRN3
Cell division cycle protein 16 homolog	CDC16
Protein flightless-1 homolog	FLII
Protein flightless-1 homolog	FLII
E3 ubiquitin-protein ligase TRIM32	TRIM32
39S ribosomal protein L28, mitochondrial	MRPL28
Acetyl-CoA carboxylase 1;Biotin carboxylase	ACACA
Chromatin assembly factor 1 subunit B	CHAF1B
TNF receptor-associated factor 3	TRAF3
Protein Red	IK
5-AMP-activated protein kinase catalytic subunit alpha-1	PRKAA1
Translation initiation factor eIF-2B subunit epsilon	EIF2B5
TAR DNA-binding protein 43	TARDBP
Heterogeneous nuclear ribonucleoprotein A0	HNRNPA0
Aminoacyl tRNA synthase complex-interacting multifunctional protein 2	AIMP2
Chromobox protein homolog 3	CBX3
26S proteasome non-ATPase regulatory subunit 2	PSMD2
Probable ATP-dependent RNA helicase DDX10	DDX10
Nucleoside diphosphate kinase 3;Nucleoside diphosphate kinase	NME3
Serine/arginine-rich splicing factor 9	SRSF9
Serine/arginine-rich splicing factor 5	SRSF5
Serine/arginine-rich splicing factor 6	SRSF6
Mitotic spindle assembly checkpoint protein MAD2A	MAD2L1
Transcription intermediary factor 1-beta	TRIM28
Ras GTPase-activating protein-binding protein 1	G3BP1
Polyadenylate-binding protein 4;Polyadenylate-binding protein	PABPC4
Metastasis-associated protein MTA1	MTA1
Eukaryotic translation initiation factor 3 subunit I	EIF3I
Phospholipase D1	PLD1
39S ribosomal protein L49, mitochondrial	MRPL49
Cytoplasmic dynein 1 intermediate chain 2	DYNC1I2
Beta-2-syntrophin	SNTB2
Treacle protein	TCOF1
Splicing factor 3B subunit 2	SF3B2
28 kDa heat- and acid-stable phosphoprotein	PDAP1
V-type proton ATPase 116 kDa subunit a isoform 3;V-type proton ATPase subunit a	TCIRG1
Sequestosome-1	SQSTM1
Serine/threonine-protein kinase PRP4 homolog	PRPF4B
Serine/threonine-protein kinase ATR	ATR
Histone deacetylase 1	HDAC1
Dynactin subunit 2	DCTN2
SNW domain-containing protein 1	SNW1
Ras GTPase-activating-like protein IQGAP2	IQGAP2
Transformer-2 protein homolog alpha	TRA2A
KRR1 small subunit processome component homolog	KRR1
Periodic tryptophan protein 1 homolog	PWP1
Cullin-3	CUL3
Cullin-4A	CUL4A
Dual specificity tyrosine-phosphorylation-regulated kinase 1A	DYRK1A
Mannosyl-oligosaccharide glucosidase	MOGS
THO complex subunit 5 homolog	THOC5
Spectrin alpha chain, non-erythrocytic 1	SPTAN1
Nucleolar GTP-binding protein 2	GNL2
BTB/POZ domain-containing adapter for CUL3-mediated RhoA degradation protein 2	TNFAIP1
Spliceosome RNA helicase DDX39B	DDX39B
Exosome complex component RRP4	EXOSC2
Tubulin beta-2A chain	TUBB2A
Bystin	BYSL
Cytoskeleton-associated protein 5	CKAP5
Heterogeneous nuclear ribonucleoprotein D0	HNRNPD
Desmoglein-2	DSG2
Ribosome biogenesis protein BOP1	BOP1
Kelch-like ECH-associated protein 1	KEAP1
Unhealthy ribosome biogenesis protein 2 homolog	URB2
Eukaryotic translation initiation factor 3 subunit A	EIF3A
Ubiquitin-associated protein 2-like	UBAP2L
Malectin	MLEC
Tubulin--tyrosine ligase-like protein 12	TTLL12
Transcription factor Dp-1	TFDP1
Werner syndrome ATP-dependent helicase	WRN
Cytoplasmic dynein 1 heavy chain 1	DYNC1H1
Translation initiation factor eIF-2B subunit alpha	EIF2B1
Ensconsin	MAP7
Src substrate cortactin	CTTN
Flotillin-2	FLOT2
Reticulocalbin-2	RCN2
Filamin-C	FLNC
Peptidyl-prolyl cis-trans isomerase FKBP8	FKBP8
Protein FRG1	FRG1
Guanine nucleotide-binding protein subunit alpha-13	GNA13
Caprin-1	CAPRIN1
RNA-binding protein 39	RBM39
Hepatocyte nuclear factor 4-gamma;Hepatocyte nuclear factor 4-alpha	HNF4G;HNF4A
ATP-dependent RNA helicase DHX8	DHX8
DNA replication licensing factor MCM6	MCM6
Inositol 1,4,5-trisphosphate receptor type 2	ITPR2
Inositol 1,4,5-trisphosphate receptor type 3	ITPR3
Desmocollin-3	DSC3
Type I inositol 1,4,5-trisphosphate 5-phosphatase	INPP5A
Inositol 1,4,5-trisphosphate receptor type 1	ITPR1
EKC/KEOPS complex subunit LAGE3	LAGE3
E3 ubiquitin-protein ligase TRIP12	TRIP12
Mediator of DNA damage checkpoint protein 1	MDC1
Clathrin interactor 1	CLINT1
Structural maintenance of chromosomes protein 1A;Structural maintenance of chromosomes protein	SMC1A
Ribosomal RNA processing protein 1 homolog B	RRP1B
Protein RRP5 homolog	PDCD11
Ribosome biogenesis protein BMS1 homolog	BMS1
Ubiquitin carboxyl-terminal hydrolase 10	USP10
Neutral alpha-glucosidase AB	GANAB
Raftlin	RFTN1
Lamin-B receptor	LBR
Chromobox protein homolog 2	CBX2
Kinesin-like protein KIF22;Kinesin-like protein	KIF22
Myocyte-specific enhancer factor 2D	MEF2D
Zinc finger protein 638	ZNF638
Importin subunit beta-1	KPNB1
Nucleolar and coiled-body phosphoprotein 1	NOLC1
Nuclear mitotic apparatus protein 1	NUMA1
Sarcolemmal membrane-associated protein	SLMAP
ER membrane protein complex subunit 2	EMC2
Mortality factor 4-like protein 2	MORF4L2
Squamous cell carcinoma antigen recognized by T-cells 3	SART3
Condensin complex subunit 1	NCAPD2
Exosome complex component RRP42	EXOSC7
116 kDa U5 small nuclear ribonucleoprotein component	EFTUD2
Rab3 GTPase-activating protein catalytic subunit	RAB3GAP1
Lysine--tRNA ligase	KARS
Histone-lysine N-methyltransferase SETDB1	SETDB1
Ribosome biogenesis regulatory protein homolog	RRS1
IQ calmodulin-binding motif-containing protein 1	IQCB1
DNA polymerase delta subunit 3	POLD3
Eukaryotic translation initiation factor 4H	EIF4H
Kinesin-like protein KIF14	KIF14
WD repeat-containing protein 43	WDR43
Zinc finger protein OZF	ZNF146
Protein disulfide-isomerase A6	PDIA6
Plectin	PLEC
Plectin	PLEC
Pericentriolar material 1 protein	PCM1
Non-POU domain-containing octamer-binding protein	NONO
Periodic tryptophan protein 2 homolog	PWP2
Ras-related protein Rab-35	RAB35
RalA-binding protein 1	RALBP1
Transcription termination factor 1	TTF1
Poly(rC)-binding protein 1	PCBP1
Transcription elongation factor B polypeptide 2	TCEB2
Ephrin type-A receptor 7	EPHA7
Ubiquitin-protein ligase E3C	UBE3C
Splicing factor 3B subunit 3	SF3B3
Pumilio domain-containing protein KIAA0020	KIAA0020
Ras suppressor protein 1	RSU1
Scaffold attachment factor B1	SAFB
Splicing factor 3B subunit 4	SF3B4
Splicing factor 3A subunit 2	SF3A2
Splicing factor 3A subunit 1	SF3A1
Helicase SKI2W	SKIV2L
Surfeit locus protein 2	SURF2
Transcription initiation factor TFIID subunit 7	TAF7
TATA box-binding protein-associated factor RNA polymerase I subunit C	TAF1C
TATA box-binding protein-associated factor RNA polymerase I subunit A	TAF1A
Dixin	DIXDC1
RISC-loading complex subunit TARBP2	TARBP2
Splicing factor 1	SF1
Pachytene checkpoint protein 2 homolog	TRIP13
Mediator of RNA polymerase II transcription subunit 1	MED1
Activating signal cointegrator 1	TRIP4
ELAV-like protein 1	ELAVL1
Myosin light chain kinase, smooth muscle;Myosin light chain kinase, smooth muscle, deglutamylated form	MYLK
Probable E3 ubiquitin-protein ligase HERC1	HERC1
Myeloid leukemia factor 2	MLF2
Zinc finger protein with KRAB and SCAN domains 8	ZKSCAN8
Vesicle-associated membrane protein 3	VAMP3
V-type proton ATPase subunit S1	ATP6AP1
Vacuolar protein sorting-associated protein 72 homolog	VPS72
Alpha-internexin	INA
Serine/threonine-protein kinase N2	PKN2
DNA damage-binding protein 1	DDB1
Serine/threonine-protein phosphatase 2A 56 kDa regulatory subunit epsilon isoform	PPP2R5E
Hsp90 co-chaperone Cdc37;Hsp90 co-chaperone Cdc37, N-terminally processed	CDC37
Histone-binding protein RBBP7	RBBP7
Serine/arginine-rich splicing factor 7	SRSF7
Cleavage and polyadenylation specificity factor subunit 6	CPSF6
Drebrin	DBN1
Fascin	FSCN1
2,4-dienoyl-CoA reductase, mitochondrial	DECR1
NADH dehydrogenase [ubiquinone] 1 alpha subcomplex subunit 5	NDUFA5
Histone H2A type 2-C;Histone H2A type 2-A	HIST2H2AC;HIST2H2AA3
NADH dehydrogenase [ubiquinone] 1 alpha subcomplex subunit 9, mitochondrial	NDUFA9
V-type proton ATPase subunit F	ATP6V1F
MICOS complex subunit MIC60	IMMT
Lysine-rich nucleolar protein 1	KNOP1
Heterogeneous nuclear ribonucleoprotein U-like protein 2	HNRNPUL2;HNRNPUL2-BSCL2
Centrosome and spindle pole-associated protein 1	CSPP1
Inverted formin-2	INF2
Sister chromatid cohesion protein PDS5 homolog A	PDS5A
Uncharacterized protein KIAA0753	KIAA0753
Kinesin-like protein KIF7	KIF7
Pre-rRNA-processing protein TSR1 homolog	TSR1
Glutamine-rich protein 1	QRICH1
Transcription factor p65	RELA
WD40 repeat-containing protein SMU1;WD40 repeat-containing protein SMU1, N-terminally processed	SMU1
FH1/FH2 domain-containing protein 3	FHOD3
AP-5 complex subunit beta-1	AP5B1
Leucine-rich repeat flightless-interacting protein 1	LRRFIP1
UPF0711 protein C18orf21	C18orf21
Prolyl 3-hydroxylase 1	LEPRE1
MAP7 domain-containing protein 1	MAP7D1
Protein LSM12 homolog	LSM12
ADP-ribosylation factor-like protein 13B	ARL13B
Vacuolar ATPase assembly integral membrane protein VMA21	VMA21
Mitochondrial import inner membrane translocase subunit TIM50	TIMM50
Putative oxidoreductase GLYR1	GLYR1
C2 domain-containing protein 3	C2CD3
La-related protein 7	LARP7
TBC1 domain family member 10B	TBC1D10B
Taperin	TPRN
Enhancer of polycomb homolog 2	EPC2
Programmed cell death protein 4	PDCD4
Fibronectin type III domain-containing protein 3B	FNDC3B
Centrosomal protein of 55 kDa	CEP55
Uncharacterized protein C17orf85	C17orf85
Kelch-like protein 12	KLHL12
Pleckstrin homology domain-containing family O member 1	PLEKHO1
Nucleoporin GLE1	GLE1
U4/U6.U5 tri-snRNP-associated protein 2	USP39
Borealin	CDCA8
Transmembrane protein 177	TMEM177
TATA box-binding protein-associated factor RNA polymerase I subunit B	TAF1B
Beta-actin-like protein 2	ACTBL2
N-acetyltransferase ESCO2	ESCO2
Outer dense fiber protein 2	ODF2
DBIRD complex subunit ZNF326	ZNF326
Nucleolar MIF4G domain-containing protein 1	NOM1
DnaJ homolog subfamily C member 21	DNAJC21
Rab-like protein 3	RABL3
APC membrane recruitment protein 1	AMER1
RRP12-like protein	RRP12
Torsin-1A-interacting protein 1	TOR1AIP1
Alanine--tRNA ligase, mitochondrial	AARS2
PCI domain-containing protein 2	PCID2
Intracellular hyaluronan-binding protein 4	HABP4
Mediator of RNA polymerase II transcription subunit 23	MED23
Crooked neck-like protein 1	CRNKL1
Cytospin-B	SPECC1
Deoxynucleotidyltransferase terminal-interacting protein 2	DNTTIP2
28S ribosomal protein S18a, mitochondrial	MRPS18A
Mitochondrial genome maintenance exonuclease 1	MGME1
Exosome complex component MTR3	EXOSC6
Transmembrane protein 201	TMEM201
Nucleoporin NUP188 homolog	NUP188
Heterochromatin protein 1-binding protein 3	HP1BP3
Centrosomal protein of 170 kDa	CEP170
Polynucleotide 5-hydroxyl-kinase NOL9	NOL9
Zinc finger CCCH domain-containing protein 13	ZC3H13
Putative methyltransferase C9orf114	C9orf114
G patch domain-containing protein 4	GPATCH4
HEAT repeat-containing protein 1;HEAT repeat-containing protein 1, N-terminally processed	HEATR1
E3 ubiquitin-protein ligase HECTD3	HECTD3
E3 ubiquitin-protein ligase UBR4	UBR4
Rho GTPase-activating protein 21	ARHGAP21
39S ribosomal protein L2, mitochondrial	MRPL2
Transmembrane protein 59	TMEM59
RNA-binding protein 26	RBM26
ATPase family AAA domain-containing protein 3B	ATAD3B
Protein wntless homolog	WLS
Protein argonaute;Protein argonaute-1	AGO1
DEP domain-containing protein 1A	DEPDC1
Growth hormone-regulated TBC protein 1	GRTP1
Cancer-related nucleoside-triphosphatase	NTPCR
Probable ATP-dependent RNA helicase DHX35	DHX35
Telomere-associated protein RIF1	RIF1
Centrosome-associated protein 350	CEP350
Serine/threonine-protein kinase MRCK alpha;Non-specific serine/threonine protein kinase	CDC42BPA
Leucine-rich repeat and calponin homology domain-containing protein 2	LRCH2
Threonylcarbamoyladenosine tRNA methylthiotransferase	CDKAL1
Focadhesin	FOCAD
Partitioning defective 3 homolog	PARD3
Lysophospholipase-like protein 1	LYPLAL1
SPRY domain-containing protein 7	SPRYD7
Protein FAM91A1	FAM91A1
Centrosomal protein of 135 kDa	CEP135
Protein SPT2 homolog	SPTY2D1
Integrator complex subunit 3	INTS3
Rho GTPase-activating protein 17	ARHGAP17
Protein virilizer homolog	KIAA1429
Cytospin-A	SPECC1L;SPECC1L-ADORA2A
Lysine-specific demethylase 4D	KDM4D
Zinc finger protein 787	ZNF787
60S ribosomal protein L7-like 1	RPL7L1
Ragulator complex protein LAMTOR1	LAMTOR1
Serine/threonine-protein phosphatase 4 regulatory subunit 3A	SMEK1
Centromere protein P	CENPP
Nipped-B-like protein	NIPBL
Uncharacterized protein CXorf57	CXorf57
Uncharacterized protein C3orf17	C3orf17
Armadillo repeat-containing protein 6	ARMC6
Phostensin	PPP1R18
Zinc finger CCHC domain-containing protein 8	ZCCHC8
RNA pseudouridylate synthase domain-containing protein 3	RPUSD3
Putative ATP-dependent RNA helicase DHX57	DHX57
39S ribosomal protein L54, mitochondrial	MRPL54
Parafibromin	CDC73
39S ribosomal protein L14, mitochondrial	MRPL14
Armadillo repeat-containing X-linked protein 5	ARMCX5
Coiled-coil and C2 domain-containing protein 1A	CC2D1A
Transcription initiation factor TFIID subunit 2	TAF2
Enhancer of mRNA-decapping protein 4	EDC4
Pre-mRNA-processing-splicing factor 8	PRPF8
Tetratricopeptide repeat protein 27	TTC27
Sideroflexin-4	SFXN4
Rho GTPase-activating protein 11A	ARHGAP11A
Glutamate-rich protein 5	ERICH5
TLD domain-containing protein 1	TLDC1
Round spermatid basic protein 1-like protein	RSBN1L
E3 ubiquitin-protein ligase RFWD3	RFWD3
RNA polymerase-associated protein CTR9 homolog	CTR9
Tetratricopeptide repeat protein 37	TTC37
F-box only protein 46	FBXO46
Tripartite motif-containing protein 65	TRIM65
WD repeat-containing protein 59	WDR59
Zinc finger CCCH domain-containing protein 14	ZC3H14
Coiled-coil domain-containing protein 137	CCDC137
La-related protein 1	LARP1
E3 ubiquitin-protein ligase TRAF7	TRAF7
Rapamycin-insensitive companion of mTOR	RICTOR
WD repeat-containing protein 74	WDR74
Type-1 angiotensin II receptor-associated protein	AGTRAP
POTE ankyrin domain family member E;POTE ankyrin domain family member F	POTEE;POTEF
Atherin	SAMD1
Pre-mRNA 3-end-processing factor FIP1	FIP1L1
Spindle assembly abnormal protein 6 homolog	SASS6
DBH-like monooxygenase protein 1	MOXD1
WD repeat-containing protein 82	WDR82
BCL-6 corepressor	BCOR
Myosin phosphatase Rho-interacting protein	MPRIP
PERQ amino acid-rich with GYF domain-containing protein 2	GIGYF2
CD109 antigen	CD109
Putative protein C3P1	C3P1
Nesprin-3	SYNE3
NF-X1-type zinc finger protein NFXL1	NFXL1
Tubulin polyglutamylase complex subunit 1	TPGS1
Centrosomal protein of 128 kDa	CEP128
TOM1-like protein 2	TOM1L2
PAX-interacting protein 1	PAXIP1
Acyl-CoA dehydrogenase family member 11	ACAD11
Inactive ubiquitin carboxyl-terminal hydrolase 54	USP54
Centromere protein U	CENPU
La-related protein 4	LARP4
Tubulin alpha-1A chain	TUBA1A
E3 ubiquitin-protein ligase Hakai	CBLL1
Nucleolar protein 8	NOL8
Transcription elongation factor SPT6	SUPT6H
Staphylococcal nuclease domain-containing protein 1	SND1
Mitochondrial ribonuclease P protein 1	TRMT10C
Putative ATP-dependent RNA helicase DHX30	DHX30
Eukaryotic translation initiation factor 3 subunit M	EIF3M
7SK snRNA methylphosphate capping enzyme	MEPCE
Centromere protein Q	CENPQ
Zinc finger protein 771	ZNF771
Ras-related GTP-binding protein A;Ras-related GTP-binding protein B	RRAGA;RRAGB
Cytoplasmic FMR1-interacting protein 1	CYFIP1
Protein MCM10 homolog	MCM10
Golgi to ER traffic protein 4 homolog	GET4
FAST kinase domain-containing protein 5	FASTKD5
Endonuclease/exonuclease/phosphatase family domain-containing protein 1	EEPD1
Charged multivesicular body protein 1b	CHMP1B
Heparan sulfate 2-O-sulfotransferase 1	HS2ST1
Protein-methionine sulfoxide oxidase MICAL3	MICAL3
PHD finger-like domain-containing protein 5A	PHF5A
TRMT1-like protein	TRMT1L
Zinc finger CCCH-type antiviral protein 1	ZC3HAV1
39S ribosomal protein L21, mitochondrial	MRPL21
Nucleoporin p54	NUP54
Pogo transposable element with ZNF domain	POGZ
Mediator of RNA polymerase II transcription subunit 12	TNRC11;MED12
Myosin-14	MYH14
Nuclear fragile X mental retardation-interacting protein 2	NUFIP2
CLIP-associating protein 1	CLASP1
ATP-dependent RNA helicase DHX29	DHX29
HAUS augmin-like complex subunit 6	HAUS6
HEAT repeat-containing protein 3	HEATR3
Golgin subfamily A member 7	GOLGA7
Rho GTPase-activating protein 22	ARHGAP22
Wings apart-like protein homolog	WAPAL
E3 ubiquitin-protein ligase RBBP6	RBBP6
E3 ubiquitin-protein ligase HUWE1	HUWE1
Transcription initiation factor TFIID subunit 8	TAF8
Centromere protein V	CENPV
Schlafen family member 11	SLFN11
Type 1 phosphatidylinositol 4,5-bisphosphate 4-phosphatase	TMEM55B
Transcriptional regulator Kaiso	ZBTB33
Tetratricopeptide repeat protein 7B	TTC7B
Probable RNA-binding protein 23	RBM23
Nucleolar protein 9	NOP9
Protein polybromo-1	PBRM1
Protein LYRIC	MTDH
Zinc finger protein 598	ZNF598
Reticulon-4 receptor-like 2	RTN4RL2
Kinectin	KTN1
Zinc finger protein 589	ZNF589
N-alpha-acetyltransferase 40	NAA40
Leucine zipper protein 1	LUZP1
THO complex subunit 4	ALYREF
Ras GTPase-activating-like protein IQGAP3	IQGAP3
Cullin-associated NEDD8-dissociated protein 1	CAND1
Protein Hook homolog 3	HOOK3
Juxtaposed with another zinc finger protein 1	JAZF1
THO complex subunit 6 homolog	THOC6
Active regulator of SIRT1	RPS19BP1
Lipolysis-stimulated lipoprotein receptor	LSR
Chondroitin sulfate synthase 1	CHSY1
Condensin-2 complex subunit G2	NCAPG2
ATP-dependent RNA helicase DDX42	DDX42
Spermatogenesis-associated serine-rich protein 2	SPATS2
Dynein assembly factor 5, axonemal	DNAAF5
Transcriptional repressor p66-alpha	GATAD2A
Copine-8	CPNE8
C2 domain-containing protein 5	C2CD5
E3 ubiquitin-protein ligase MIB1	MIB1
Hermansky-Pudlak syndrome 6 protein	HPS6
Bifunctional lysine-specific demethylase and histidyl-hydroxylase MINA	MINA
E3 ubiquitin-protein ligase SIAH1	SIAH1
Trafficking protein particle complex subunit 5	TRAPPC5
3-5 exoribonuclease 1	ERI1
Inactive serine/threonine-protein kinase VRK3	VRK3
Protein AHNAK2	AHNAK2
Formin-like protein 3	FMNL3
Coiled-coil domain-containing protein 50	CCDC50
WD repeat-containing protein 75	WDR75
MAP7 domain-containing protein 3	MAP7D3
DCN1-like protein 3	DCUN1D3
MAX gene-associated protein	MGA
Probable G-protein coupled receptor 125	GPR125
Zinc finger CCCH domain-containing protein 7A	ZC3H7A
PHD finger protein 6	PHF6
Serine/threonine-protein kinase LMTK2	LMTK2
SURP and G-patch domain-containing protein 1	SUGP1
Cell division cycle and apoptosis regulator protein 1	CCAR1
DnaJ homolog subfamily C member 10	DNAJC10
Mitochondrial Rho GTPase 2	RHOT2
39S ribosomal protein L41, mitochondrial	MRPL41
Nurim	NRM
Kelch-like protein 7	KLHL7
Protein FAM126B	FAM126B
Neuropathy target esterase	PNPLA6
Probable ATP-dependent RNA helicase DHX37	DHX37
Angiomotin-like protein 1	AMOTL1
pre-rRNA processing protein FTSJ3	FTSJ3
Exocyst complex component 8	EXOC8
UPF0688 protein C1orf174	C1orf174
Calcium uptake protein 2, mitochondrial	MICU2
Chondroitin sulfate synthase 2	CHPF
Proline-, glutamic acid- and leucine-rich protein 1	PELP1
Abnormal spindle-like microcephaly-associated protein	ASPM
Transcription initiation factor TFIID subunit 1-like;Transcription initiation factor TFIID subunit 1	TAF1L;TAF1
Spartin	SPG20
Zinc finger protein 444	ZNF444
Spindle and centriole-associated protein 1	SPICE1
tRNA pseudouridine synthase-like 1;tRNA pseudouridine synthase	PUSL1
Centrobin	CNTROB
Cell cycle and apoptosis regulator protein 2	CCAR2
Nuclear pore complex protein Nup93	NUP93
Zinc finger protein 687	ZNF687
Leucine-rich repeat-containing protein 47	LRRC47
Integrator complex subunit 1	INTS1
Mitochondrial cardiolipin hydrolase	PLD6
Activating signal cointegrator 1 complex subunit 3	ASCC3
1-phosphatidylinositol 4,5-bisphosphate phosphodiesterase delta-3	PLCD3
Cohesin subunit SA-2	STAG2
Formin-binding protein 4	FNBP4
Zinc finger CCHC domain-containing protein 7	ZCCHC7
Isoform 2 of Probable hydrolase PNKD	PNKD
Ninein	NIN
Misshapen-like kinase 1	MINK1
Rho guanine nucleotide exchange factor 39	ARHGEF39
Transmembrane protein 199	TMEM199
Actin filament-associated protein 1	AFAP1
Zinc finger CCHC domain-containing protein 9	ZCCHC9
Zinc finger CCCH-type with G patch domain-containing protein	ZGPAT
S1 RNA-binding domain-containing protein 1	SRBD1
WD and tetratricopeptide repeats protein 1	WDTC1
Ribonuclease P protein subunit p25-like protein	RPP25L
39S ribosomal protein L50, mitochondrial	MRPL50
Ephexin-1	NGEF
Methyltransferase-like protein 13	METTL13
ADP-ribosylation factor-like protein 6-interacting protein 6	ARL6IP6
ER membrane protein complex subunit 1	EMC1
RNA polymerase II-associated factor 1 homolog	PAF1
ATP-dependent RNA helicase DDX51	DDX51
Programmed cell death protein 7	PDCD7
Centrosomal protein of 120 kDa	CEP120
39S ribosomal protein L43, mitochondrial	MRPL43
Junction-mediating and -regulatory protein	JMY
Protein SREK1IP1	SREK1IP1
Protein KRI1 homolog	KRI1
Pre-mRNA-splicing factor 38A	PRPF38A
Zinc finger protein 62 homolog	ZFP62
Spermatogenesis-associated protein 5	SPATA5
Procollagen galactosyltransferase 1	COLGALT1
Ubiquitin-associated domain-containing protein 2	UBAC2
Tetratricopeptide repeat protein 13	TTC13
POC1 centriolar protein homolog A	POC1A
Plasminogen activator inhibitor 1 RNA-binding protein	SERBP1
LEM domain-containing protein 2	LEMD2
Protein FAM98A	FAM98A
Holliday junction recognition protein	HJURP
Cytoplasmic dynein 2 heavy chain 1	DYNC2H1
Cyclin-Y	CCNY
Zinc finger protein 280C	ZNF280C
RCC1 and BTB domain-containing protein 1	RCBTB1
Putative RNA-binding protein 15B	RBM15B
Structural maintenance of chromosomes protein 1B	SMC1B
Trinucleotide repeat-containing gene 6A protein	TNRC6A
Metal transporter CNNM3	CNNM3
ATP-binding cassette sub-family F member 1	ABCF1
Neuroguidin	NGDN
SHC SH2 domain-binding protein 1	SHCBP1
DCC-interacting protein 13-beta	APPL2
WD repeat-containing protein 19	WDR19
Lysophosphatidylcholine acyltransferase 1	LPCAT1
Nucleoporin Nup43	NUP43
Nucleoporin Nup37	NUP37
Nucleoporin NUP53	NUP35
N-acylneuraminate cytidylyltransferase	CMAS
Protein CASC5	CASC5
THO complex subunit 2	THOC2
Atypical kinase ADCK3, mitochondrial	ADCK3
Retinitis pigmentosa 9 protein	RP9
Vang-like protein 1	VANGL1
Smad nuclear-interacting protein 1	SNIP1
Growth arrest and DNA damage-inducible proteins-interacting protein 1	GADD45GIP1
WD repeat-containing protein 48	WDR48
SWI/SNF complex subunit SMARCC2	SMARCC2
Pumilio homolog 2	PUM2
TBC1 domain family member 15	TBC1D15
39S ribosomal protein L30, mitochondrial	MRPL30
Transient receptor potential cation channel subfamily M member 4	TRPM4
ATP-dependent RNA helicase DDX54	DDX54
ATP-dependent RNA helicase DDX54	DDX54
Ribosome biogenesis protein BRX1 homolog	BRIX1
U3 small nucleolar RNA-associated protein 15 homolog	UTP15
Actin filament-associated protein 1-like 1	AFAP1L1
Nuclear pore membrane glycoprotein 210	NUP210
Gem-associated protein 5	GEMIN5
Importin-4	IPO4
Zinc finger protein 483	ZNF483
DIS3-like exonuclease 1	DIS3L
Nucleolar complex protein 3 homolog	NOC3L
Fibroblast growth factor receptor substrate 2	FRS2
Peptidyl-prolyl cis-trans isomerase-like 4	PPIL4
General transcription factor 3C polypeptide 2	GTF3C2
Phosphatidylglycerophosphatase and protein-tyrosine phosphatase 1	PTPMT1
Nuclear pore complex protein Nup133	NUP133
Programmed cell death 6-interacting protein	PDCD6IP
Cactin	CACTIN
Protein THEM6	THEM6
Sorting nexin-33	SNX33
E3 ubiquitin-protein ligase TRIM41	TRIM41
RNA polymerase-associated protein LEO1	LEO1
Dimethyladenosine transferase 1, mitochondrial	TFB1M
Sec1 family domain-containing protein 1	SCFD1
Fatty acyl-CoA reductase 1	FAR1
Uncharacterized protein C2orf47, mitochondrial	C2orf47
Cytoskeleton-associated protein 2	CKAP2
Ataxin-2-like protein	ATXN2L
Splicing regulatory glutamine/lysine-rich protein 1	SREK1
Stonin-2	STON2
Progesterone-induced-blocking factor 1	PIBF1
DnaJ homolog subfamily C member 9	DNAJC9
Protein phosphatase Slingshot homolog 1	SSH1
Protein ELYS	AHCTF1
Acid sphingomyelinase-like phosphodiesterase 3b	SMPDL3B
ATP-dependent RNA helicase DDX1	DDX1
Zinc transporter SLC39A7	SLC39A7
Histone H1x	H1FX
Golgi-specific brefeldin A-resistance guanine nucleotide exchange factor 1	GBF1
RNA polymerase-associated protein RTF1 homolog	RTF1
Transmembrane protein 131	TMEM131
AP-3 complex subunit sigma-1	AP3S1
PHD finger protein 3	PHF3
Heat shock protein 105 kDa	HSPH1
Cell differentiation protein RCD1 homolog	RQCD1
Zinc finger protein 592	ZNF592
Unconventional myosin-XVIIIa	MYO18A
La-related protein 4B	LARP4B
Translational activator GCN1	GCN1L1
Nuclear pore complex protein Nup205	NUP205
28S ribosomal protein S31, mitochondrial	MRPS31
A-kinase anchor protein 1, mitochondrial	AKAP1
Proline-rich protein PRCC	PRCC
[truncated: 894 more rows]
