# Supplementary material for: MYCN drives oncogenesis by cooperating with the histone methyltransferase G9a and the WDR5 adaptor to orchestrate global gene transcription
Source: PLoS Biol. 2024 Mar 28;22(3):e3002240. doi: 10.1371/journal.pbio.3002240 (PMC11003700; doi:10.1371/journal.pbio.3002240)
Supplement: S5 Table — (XLSX) [file pbio.3002240.s012.xlsx]

## Sheet: siCtrl_WDR5_p-7
Table S5. WDR5 ChIP-seq peaks identified in siCtrl and siMYCN transfected NB cells.
PeakID (cmd=annotatePeaks.pl p-7narrowpeak/9_siCtrl_WDR5_macspeaks.txt hg19)	Chr	Start	End	Strand	Peak Score	Focus Ratio/Region Size	Annotation	Detailed Annotation	Distance to TSS	Nearest PromoterID	Entrez ID	Nearest Unigene	Nearest Refseq	Nearest Ensembl	Gene Name	Gene Alias	Gene Description	Gene Type
9_siCtrl_WDR5_peak_13028	chr4	109541497	109542822	+	7540	NA	promoter-TSS (NR_026968)	promoter-TSS (NR_026968)	374	NM_001319234	6164	Hs.438227	NM_000995	ENSG00000109475	RPL34	L34	ribosomal protein L34	protein-coding
9_siCtrl_WDR5_peak_311	chr1	45096669	45098420	+	6744	NA	intron (NM_001319957, intron 4 of 13)	CpG	39184	NR_145816	109623472		NR_145816		SNORD145	-	small nucleolar RNA, C/D box 145	snoRNA
9_siCtrl_WDR5_peak_6439	chr16	28302101	28303736	+	6656	NA	promoter-TSS (NM_001024401)	promoter-TSS (NM_001024401)	-928	NM_001024401	388228	Hs.97837	NM_001024401	ENSG00000188322	SBK1	SBK	SH3 domain binding kinase 1	protein-coding
9_siCtrl_WDR5_peak_14594	chr6	33238939	33241027	+	6434	NA	promoter-TSS (NM_001289175)	promoter-TSS (NM_001289175)	131	NM_022551	6222	Hs.448854	NM_022551	ENSG00000231500	RPS18	D6S218E|HKE3|KE-3|KE3|S18	ribosomal protein S18	protein-coding
9_siCtrl_WDR5_peak_12601	chr3	197676395	197678506	+	6330	NA	promoter-TSS (NM_001134435)	promoter-TSS (NM_001134435)	389	NM_001316311	6165	Hs.529631	NM_000996	ENSG00000182899	RPL35A	DBA5|L35A|eL33	ribosomal protein L35a	protein-coding
9_siCtrl_WDR5_peak_6941	chr17	8284751	8287297	+	6295	NA	intron (NM_000987, intron 1 of 3)	intron (NM_000987, intron 1 of 3)	487	NM_001315531	6154	Hs.482144	NM_000987	ENSG00000161970	RPL26	DBA11|L26	ribosomal protein L26	protein-coding
9_siCtrl_WDR5_peak_2230	chr10	79793365	79794806	+	6278	NA	intron (NM_033022, intron 1 of 5)	intron (NM_033022, intron 1 of 5)	464	NM_001142285	6229	Hs.280130	NM_001026	ENSG00000138326	RPS24	DBA3|S24|eS24	ribosomal protein S24	protein-coding
9_siCtrl_WDR5_peak_18101	chrX	100645459	100646887	+	6182	NA	promoter-TSS (NM_001287344)	promoter-TSS (NM_001287344)	174	NM_001199974	100529097	Hs.432485	NM_001199973		RPL36A-HNRNPH2	-	RPL36A-HNRNPH2 readthrough	protein-coding
9_siCtrl_WDR5_peak_6711	chr16	70557021	70558991	+	6085	NA	promoter-TSS (NM_015386)	promoter-TSS (NM_015386)	287	NM_012426	23450	Hs.514435	NM_012426	ENSG00000189091	SF3B3	RSE1|SAP130|SF3b130|STAF130	splicing factor 3b subunit 3	protein-coding
9_siCtrl_WDR5_peak_4835	chr13	99852075	99853795	+	6068	NA	promoter-TSS (NR_036532)	promoter-TSS (NR_036532)	74	NR_036532	100289373	Hs.225914	NR_036531	ENSG00000228889	UBAC2-AS1	-	UBAC2 antisense RNA 1	ncRNA
9_siCtrl_WDR5_peak_18146	chrX	118924559	118926230	+	6039	NA	intron (NM_001000, intron 1 of 2)	CpG	199	NM_001000	6170	Hs.300141	NM_001000	ENSG00000198918	RPL39	L39|RPL39P42|RPL39_23_1806	ribosomal protein L39	protein-coding
9_siCtrl_WDR5_peak_18069	chrX	71496198	71497785	+	6013	NA	intron (NM_001007, intron 1 of 6)	CpG	107	NM_001007	6191	Hs.118076	NM_001007	ENSG00000198034	RPS4X	CCG2|DXS306|RPS4|S4|SCAR|SCR10	ribosomal protein S4 X-linked	protein-coding
9_siCtrl_WDR5_peak_14701	chr6	42846901	42848763	+	5967	NA	intron (NR_134563, intron 1 of 5)	intron (NR_134563, intron 1 of 5)	478	NM_198486	285855	Hs.520133	NM_198486	ENSG00000146223	RPL7L1	dJ475N16.4	ribosomal protein L7 like 1	protein-coding
9_siCtrl_WDR5_peak_11489	chr22	39714433	39717124	+	5966	NA	promoter-TSS (NM_000967)	promoter-TSS (NM_000967)	-150	NM_001033853	6122	Hs.119598	NM_000967	ENSG00000100316	RPL3	ASC-1|L3|TARBP-B	ribosomal protein L3	protein-coding
9_siCtrl_WDR5_peak_3880	chr12	56509569	56512619	+	5926	NA	promoter-TSS (NM_032786)	promoter-TSS (NM_032786)	677	NM_021104	6171	Hs.112553	NM_021104	ENSG00000229117	RPL41	L41	ribosomal protein L41	protein-coding
9_siCtrl_WDR5_peak_12110	chr3	101404563	101406113	+	5916	NA	exon (NM_000986, exon 2 of 6)	exon (NM_000986, exon 2 of 6)	224	NM_000986	6152	Hs.477028	NM_000986	ENSG00000114391	RPL24	HEL-S-310|L24	ribosomal protein L24	protein-coding
9_siCtrl_WDR5_peak_11919	chr3	52028650	52030355	+	5874	NA	intron (NM_000992, intron 1 of 3)	intron (NM_000992, intron 1 of 3)	409	NM_000992	6159	Hs.425125	NM_000992	ENSG00000162244	RPL29	HIP|HUMRPL29|L29|RPL29P10|RPL29_3_370	ribosomal protein L29	protein-coding
9_siCtrl_WDR5_peak_12940	chr4	83820710	83822527	+	5793	NA	promoter-TSS (NM_001317776)	promoter-TSS (NM_001317776)	106	NM_001318120	22872	Hs.370024	NM_014933	ENSG00000138674	SEC31A	ABP125|ABP130|HSPC275|HSPC334|SEC31L1	SEC31 homolog A, COPII coat complex component	protein-coding
9_siCtrl_WDR5_peak_9901	chr2	101618210	101620015	+	5770	NA	intron (NM_001099693, intron 1 of 3)	intron (NM_001099693, intron 1 of 3)	361	NM_000993	6160	Hs.469473	NM_000993	ENSG00000071082	RPL31	L31	ribosomal protein L31	protein-coding
9_siCtrl_WDR5_peak_4275	chr12	112845994	112847909	+	5769	NA	5' UTR (NM_001320140, exon 1 of 7)	5' UTR (NM_001320140, exon 1 of 7)	138	NM_001320139	6128	Hs.528668	NM_000970	ENSG00000089009	RPL6	L6|SHUJUN-2|TAXREB107|TXREB1	ribosomal protein L6	protein-coding
9_siCtrl_WDR5_peak_5995	chr15	82823717	82825671	+	5753	NA	non-coding (NR_111943, exon 1 of 4)	non-coding (NR_111943, exon 1 of 4)	171	NR_111943	6218	Hs.433427	NM_001021	ENSG00000182774	RPS17	DBA4|RPS17L|RPS17L1|RPS17L2|S17	ribosomal protein S17	protein-coding
9_siCtrl_WDR5_peak_314	chr1	45240186	45242431	+	5751	NA	promoter-TSS (NR_000015)	promoter-TSS (NR_000015)	96	NM_001012	6202	Hs.512675	NM_001012	ENSG00000142937	RPS8	S8	ribosomal protein S8	protein-coding
9_siCtrl_WDR5_peak_8122	chr18	47017866	47019548	+	5722	NA	promoter-TSS (NM_001369561)	promoter-TSS (NM_001369561)	127	NM_001199341	6139	Hs.293653	NM_000985	ENSG00000265681	RPL17	L17|PD-1|RPL23	ribosomal protein L17	protein-coding
9_siCtrl_WDR5_peak_7097	chr17	29420928	29422805	+	5703	NA	promoter-TSS (NR_039886)	promoter-TSS (NR_039886)	-79	NM_000267	4763	Hs.113577	NM_000267	ENSG00000196712	NF1	NFNS|VRNF|WSS	neurofibromin 1	protein-coding
9_siCtrl_WDR5_peak_1215	chr1	173835990	173838129	+	5672	NA	promoter-TSS (NR_152530)	promoter-TSS (NR_152530)	70	NR_152523	60674	Hs.531856	NR_002578	ENSG00000234741	GAS5	NCRNA00030|SNHG2	growth arrest specific 5	ncRNA
9_siCtrl_WDR5_peak_17240	chr9	19379179	19380847	+	5669	NA	intron (NM_001010, intron 1 of 5)	CpG	221	NM_001010	6194	Hs.408073	NM_001010	ENSG00000137154	RPS6	S6	ribosomal protein S6	protein-coding
9_siCtrl_WDR5_peak_17837	chr9	136214025	136216178	+	5653	NA	promoter-TSS (NM_000972)	promoter-TSS (NM_000972)	28	NM_000972	6130	Hs.499839	NM_000972	ENSG00000148303	RPL7A	L7A|SURF3|TRUP	ribosomal protein L7a	protein-coding
9_siCtrl_WDR5_peak_16772	chr8	74204817	74206737	+	5610	NA	promoter-TSS (NM_000971)	promoter-TSS (NM_000971)	91	NM_000971	6129	Hs.421257	NM_000971	ENSG00000147604	RPL7	L7|humL7-1	ribosomal protein L7	protein-coding
9_siCtrl_WDR5_peak_10447	chr2	217362825	217364899	+	5606	NA	intron (NM_000998, intron 1 of 3)	intron (NM_000998, intron 1 of 3)	295	NM_000998	6168	Hs.433701	NM_000998	ENSG00000197756	RPL37A	L37A	ribosomal protein L37a	protein-coding
9_siCtrl_WDR5_peak_17717	chr9	127622994	127625016	+	5597	NA	promoter-TSS (NM_030978)	promoter-TSS (NM_030978)	231	NM_007209	11224	Hs.182825	NM_007209	ENSG00000136942	RPL35	DBA19|L35	ribosomal protein L35	protein-coding
9_siCtrl_WDR5_peak_17133	chr8	146016485	146018396	+	5577	NA	promoter-TSS (NR_106909)	promoter-TSS (NR_106909)	-64	NR_106909	102465978		NR_106909	ENSG00000283764	MIR6850	hsa-mir-6850	microRNA 6850	ncRNA
9_siCtrl_WDR5_peak_11475	chr22	38711861	38714480	+	5537	NA	5' UTR (NM_152221, exon 1 of 11)	5' UTR (NM_152221, exon 1 of 11)	268	NM_152221	1454	Hs.474833	NM_001894	ENSG00000213923	CSNK1E	CKIe|CKIepsilon|HCKIE	casein kinase 1 epsilon	protein-coding
9_siCtrl_WDR5_peak_12752	chr4	39459515	39461573	+	5516	NA	promoter-TSS (NM_006859)	promoter-TSS (NM_006859)	24	NM_000661	6133	Hs.412370	NM_000661	ENSG00000163682	RPL9	L9|NPC-A-16	ribosomal protein L9	protein-coding
9_siCtrl_WDR5_peak_14557	chr6	31508667	31510798	+	5516	NA	promoter-TSS (NR_037852).2	promoter-TSS (NR_037852).2	48	NM_004640	7919	Hs.254042	NM_004640	ENSG00000198563	DDX39B	BAT1|D6S81E|UAP56	DExD-box helicase 39B	protein-coding
9_siCtrl_WDR5_peak_10864	chr20	37062634	37064311	+	5494	NA	promoter-TSS (NR_003018)	promoter-TSS (NR_003018)	548	NR_152764	388796	Hs.400876	NR_015366	ENSG00000196756	SNHG17	-	small nucleolar RNA host gene 17	ncRNA
9_siCtrl_WDR5_peak_8384	chr19	5689843	5691908	+	5469	NA	TTS (NM_001276480)	TTS (NM_001276480)	569	NM_033643	25873	Hs.408018	NM_015414	ENSG00000130255	RPL36	L36	ribosomal protein L36	protein-coding
9_siCtrl_WDR5_peak_13469	chr5	37370554	37372213	+	5444	NA	promoter-TSS (NM_004298)	promoter-TSS (NM_004298)	-175	NM_153485	9631	Hs.547696	NM_004298	ENSG00000113569	NUP155	ATFB15|N155	nucleoporin 155	protein-coding
9_siCtrl_WDR5_peak_18247	chrY	2709261	2710459	+	5444	NA	intron (NM_001008, intron 1 of 6)	intron (NM_001008, intron 1 of 6)	217	NM_001008	6192	Hs.282376	NM_001008	ENSG00000129824	RPS4Y1	RPS4Y|S4	ribosomal protein S4 Y-linked 1	protein-coding
9_siCtrl_WDR5_peak_16460	chr8	15396747	15398471	+	5430	NA	promoter-TSS (NM_001356429)	promoter-TSS (NM_001356429)	13	NM_178234	7991	Hs.426324	NM_006765	ENSG00000104723	TUSC3	D8S1992|M33|MRT22|MRT7|MagT2|N33|OST3A|SLC58A2	tumor suppressor candidate 3	protein-coding
9_siCtrl_WDR5_peak_16527	chr8	26148490	26150121	+	5389	NA	5' UTR (NM_002717, exon 1 of 10)	5' UTR (NM_002717, exon 1 of 10)	281	NM_002717	5520	Hs.146339	NM_002717	ENSG00000221914	PPP2R2A	B55A|B55ALPHA|PR52A|PR55A|PR55alpha	protein phosphatase 2 regulatory subunit Balpha	protein-coding
9_siCtrl_WDR5_peak_2965	chr11	62339975	62342290	+	5380	NA	intron (NM_001404, intron 1 of 9)	intron (NM_001404, intron 1 of 9)	231	NM_001404	1937	Hs.144835	NM_001404	ENSG00000254772	EEF1G	EF1G|GIG35	eukaryotic translation elongation factor 1 gamma	protein-coding
9_siCtrl_WDR5_peak_6002	chr15	83207951	83209989	+	5362	NA	non-coding (NR_111943, exon 1 of 4).2	non-coding (NR_111943, exon 1 of 4).2	238	NR_111943	6218	Hs.433427	NM_001021	ENSG00000182774	RPS17	DBA4|RPS17L|RPS17L1|RPS17L2|S17	ribosomal protein S17	protein-coding
9_siCtrl_WDR5_peak_13184	chr4	152020105	152021944	+	5362	NA	intron (NM_001267699, intron 1 of 2)	CpG	244	NM_001006	6189	Hs.356572	NM_001006	ENSG00000145425	RPS3A	FTE1|MFTL|S3A	ribosomal protein S3A	protein-coding
9_siCtrl_WDR5_peak_14259	chr5	180669630	180671744	+	5329	NA	promoter-TSS (NR_002591)	promoter-TSS (NR_002591)	219	NM_006098	10399	Hs.5662	NM_006098	ENSG00000204628	RACK1	GNB2L1|Gnb2-rs1|H12.3|HLC-7|PIG21	receptor for activated C kinase 1	protein-coding
9_siCtrl_WDR5_peak_9730	chr2	73459981	73462635	+	5285	NA	promoter-TSS (NM_001166284)	promoter-TSS (NM_001166284)	-56	NM_001166285	10574	Hs.368149	NM_006429	ENSG00000135624	CCT7	CCTETA|CCTH|NIP7-1|TCP1ETA	chaperonin containing TCP1 subunit 7	protein-coding
9_siCtrl_WDR5_peak_8459	chr19	10828053	10829147	+	5283	NA	promoter-TSS (NM_004945)	promoter-TSS (NM_004945)	-129	NM_001005361	1785	Hs.211463	NM_004945	ENSG00000079805	DNM2	CMT2M|CMTDI1|CMTDIB|DI-CMTB|DYN2|DYNII|LCCS5	dynamin 2	protein-coding
9_siCtrl_WDR5_peak_16229	chr7	135346055	135347932	+	5262	NA	promoter-TSS (NM_001130929)	promoter-TSS (NM_001130929)	-269	NM_001130929	647087	Hs.200022	NM_001130929	ENSG00000243317	STMP1	C7orf73|PL-5283	short transmembrane mitochondrial protein 1	protein-coding
9_siCtrl_WDR5_peak_10633	chr20	2450002	2451912	+	5255	NA	intron (NM_198216, intron 1 of 6)	intron (NM_198216, intron 1 of 6)	478	NM_003091	6628	Hs.83753	NM_003091	ENSG00000125835	SNRPB	CCMS|COD|SNRPB1|Sm-B/B'|SmB/B'|SmB/SmB'|snRNP-B	small nuclear ribonucleoprotein polypeptides B and B1	protein-coding
9_siCtrl_WDR5_peak_17738	chr9	130212589	130214427	+	5210	NA	promoter-TSS (NM_138361)	promoter-TSS (NM_138361)	177	NM_000976	6136	Hs.408054	NM_000976	ENSG00000197958	RPL12	L12	ribosomal protein L12	protein-coding
9_siCtrl_WDR5_peak_213	chr1	31537490	31538749	+	5175	NA	intron (NM_014676, intron 1 of 21)	intron (NM_014676, intron 1 of 21)	445	NM_001020658	9698	Hs.281707	NM_014676	ENSG00000134644	PUM1	HSPUM|PUMH|PUMH1|PUML1|SCA47	pumilio RNA binding family member 1	protein-coding
9_siCtrl_WDR5_peak_17830	chr9	135544895	135546853	+	5170	NA	promoter-TSS (NM_012204)	promoter-TSS (NM_012204)	23	NM_012204	9329	Hs.22302	NM_012204	ENSG00000125484	GTF3C4	KAT12|TF3C-delta|TFIII90|TFIIIC290|TFIIIC90|TFIIICDELTA	general transcription factor IIIC subunit 4	protein-coding
9_siCtrl_WDR5_peak_6366	chr16	18800156	18802251	+	5166	NA	intron (NM_001030009, intron 1 of 4)	intron (NM_001030009, intron 1 of 4)	453	NM_001030009	6210	Hs.370504	NM_001019	ENSG00000134419	RPS15A	DBA20|S15a	ribosomal protein S15a	protein-coding
9_siCtrl_WDR5_peak_9810	chr2	85838693	85840356	+	5159	NA	promoter-TSS (NM_001013649)	promoter-TSS (NM_001013649)	298	NM_001256727	10713	Hs.654745	NM_006590	ENSG00000168883	USP39	65K|CGI-21|HSPC332|SAD1|SNRNP65	ubiquitin specific peptidase 39	protein-coding
9_siCtrl_WDR5_peak_10866	chr20	37100131	37102004	+	5155	NA	promoter-TSS (NM_001282918)	promoter-TSS (NM_001282918)	-419	NM_001282917	57148	Hs.598850	NM_020336	ENSG00000170471	RALGAPB	KIAA1219|RalGAPbeta	Ral GTPase activating protein non-catalytic beta subunit	protein-coding
9_siCtrl_WDR5_peak_14627	chr6	35435293	35438447	+	5152	NA	intron (NM_007104, intron 3 of 5)	CpG-22053	692	NM_007104	4736	Hs.148340	NM_007104	ENSG00000198755	RPL10A	CSA19|Csa-19|L10A|NEDD6	ribosomal protein L10a	protein-coding
9_siCtrl_WDR5_peak_8956	chr19	49121136	49123463	+	5151	NA	promoter-TSS (NM_020126)	promoter-TSS (NM_020126)	136	NM_001270490	6141	Hs.515517	NM_000979	ENSG00000063177	RPL18	DBA18|L18	ribosomal protein L18	protein-coding
9_siCtrl_WDR5_peak_15723	chr7	45024749	45026869	+	5125	NA	promoter-TSS (NR_002952)	promoter-TSS (NR_002952)	486	NR_152595	285958	Hs.25892	NR_003697	ENSG00000232956	SNHG15	C7orf40|Linc-Myo1g|MYO1GUT	small nucleolar RNA host gene 15	ncRNA
9_siCtrl_WDR5_peak_14666	chr6	38669771	38671215	+	5121	NA	intron (NM_006708, intron 1 of 5)	intron (NM_006708, intron 1 of 5)	428	NM_006708	2739	Hs.268849	NM_006708	ENSG00000124767	GLO1	GLOD1|GLYI|HEL-S-74	glyoxalase I	protein-coding
9_siCtrl_WDR5_peak_6499	chr16	30536900	30538693	+	5107	NA	promoter-TSS (NM_024671)	promoter-TSS (NM_024671)	91	NM_024671	79724	Hs.85658	NM_024671	ENSG00000169957	ZNF768	-	zinc finger protein 768	protein-coding
9_siCtrl_WDR5_peak_11162	chr21	32930616	32933113	+	5092	NA	promoter-TSS (NM_003253)	promoter-TSS (NM_003253)	318	NM_001321023	150051	Hs.708976	NM_001321023		LOC150051	-	uncharacterized LOC150051	protein-coding
9_siCtrl_WDR5_peak_152	chr1	24017699	24019287	+	5086	NA	intron (NM_001199802, intron 1 of 5)	CpG	197	NM_000975	6135	Hs.719951	NM_000975	ENSG00000142676	RPL11	DBA7|GIG34|L11|uL5	ribosomal protein L11	protein-coding
9_siCtrl_WDR5_peak_8294	chr19	1437956	1439672	+	5084	NA	exon (NM_001018, exon 2 of 4)	exon (NM_001018, exon 2 of 4)	390	NM_001308226	6209	Hs.406683	NM_001018	ENSG00000115268	RPS15	RIG|S15	ribosomal protein S15	protein-coding
9_siCtrl_WDR5_peak_5585	chr15	43885612	43887477	+	5065	NA	non-coding (NR_135750, exon 2 of 10)	non-coding (NR_135750, exon 2 of 10)	512	NR_135748	1159	Hs.741420	NM_020990	ENSG00000237289	CKMT1B	CKMT|CKMT1|UMTCK	creatine kinase, mitochondrial 1B	protein-coding
9_siCtrl_WDR5_peak_11454	chr22	36923503	36926268	+	5062	NA	intron (NR_156418, intron 1 of 14)	intron (NR_156418, intron 1 of 14)	328	NM_003753	8664	Hs.55682	NM_003753	ENSG00000100353	EIF3D	EIF3S7|eIF3-p66|eIF3-zeta	eukaryotic translation initiation factor 3 subunit D	protein-coding
9_siCtrl_WDR5_peak_14588	chr6	32935868	32941757	+	5043	NA	promoter-TSS (NM_001199455)	promoter-TSS (NM_001199455)	105	NM_001113182	6046	Hs.75243	NM_005104	ENSG00000204256	BRD2	BRD2-IT1|D6S113E|FSH|FSRG1|NAT|O27.1.1|RING3|RNF3	bromodomain containing 2	protein-coding
9_siCtrl_WDR5_peak_14404	chr6	20400984	20404740	+	5033	NA	intron (NM_001949, intron 1 of 6)	CpG	752	NM_001949	1871	Hs.269408	NM_001949	ENSG00000112242	E2F3	E2F-3	E2F transcription factor 3	protein-coding
9_siCtrl_WDR5_peak_12493	chr3	184031884	184033821	+	5006	NA	promoter-TSS (NM_182917)	promoter-TSS (NM_182917)	-100	NM_182917	1981	Hs.433750	NM_004953	ENSG00000114867	EIF4G1	EIF-4G1|EIF4F|EIF4G|EIF4GI|P220|PARK18	eukaryotic translation initiation factor 4 gamma 1	protein-coding
9_siCtrl_WDR5_peak_14019	chr5	149828035	149829844	+	4969	NA	intron (NM_005617, intron 1 of 4)	CpG	363	NM_001025071	6208	Hs.744846	NM_005617	ENSG00000164587	RPS14	EMTB|S14	ribosomal protein S14	protein-coding
9_siCtrl_WDR5_peak_17645	chr9	113017383	113019408	+	4950	NA	intron (NM_001244938, intron 1 of 3)	CpG	392	NM_001244938	7295	Hs.435136	NM_003329	ENSG00000136810	TXN	TRDX|TRX|TRX1	thioredoxin	protein-coding
9_siCtrl_WDR5_peak_13481	chr5	40833904	40836369	+	4941	NA	intron (NR_159993, intron 1 of 4)	intron (NR_159993, intron 1 of 4)	188	NR_159993	6167	Hs.80545	NM_000997	ENSG00000145592	RPL37	L37	ribosomal protein L37	protein-coding
9_siCtrl_WDR5_peak_6823	chr17	1302190	1304253	+	4933	NA	intron (NR_024058, intron 1 of 6)	CpG	295	NM_006761	7531	Hs.513851	NM_006761	ENSG00000108953	YWHAE	14-3-3E|HEL2|KCIP-1|MDCR|MDS	tyrosine 3-monooxygenase/tryptophan 5-monooxygenase activation protein epsilon	protein-coding
9_siCtrl_WDR5_peak_3157	chr11	75110028	75112289	+	4912	NA	promoter-TSS (NR_000005)	promoter-TSS (NR_000005)	-277	NR_000005	6079	Hs.689081	NR_000005	ENSG00000206941	SNORD15A	RNU15A|SNORNA|U15A	small nucleolar RNA, C/D box 15A	snoRNA
9_siCtrl_WDR5_peak_7165	chr17	37008721	37010863	+	4912	NA	promoter-TSS (NR_002576)	promoter-TSS (NR_002576)	182	NM_000978	9349	Hs.406300	NM_000978	ENSG00000125691	RPL23	L23|rpL17	ribosomal protein L23	protein-coding
9_siCtrl_WDR5_peak_11732	chr3	23957864	23960089	+	4817	NA	promoter-TSS (NM_020345)	promoter-TSS (NM_020345)	353	NM_001253383	6138	Hs.381219	NM_002948	ENSG00000174748	RPL15	DBA12|EC45|L15|RPL10|RPLY10|RPYL10	ribosomal protein L15	protein-coding
9_siCtrl_WDR5_peak_3901	chr12	57117650	57119694	+	4793	NA	intron (NM_001320193, intron 1 of 7)	intron (NM_001320193, intron 1 of 7)	411	NM_001320194	4666	Hs.505735	NM_005594	ENSG00000196531	NACA	HSD48|NAC-alpha|NACA1|skNAC	nascent polypeptide associated complex subunit alpha	protein-coding
9_siCtrl_WDR5_peak_8098	chr18	43752839	43754678	+	4779	NA	promoter-TSS (NM_145055)	promoter-TSS (NM_145055)	-230	NM_001008239	147339	Hs.116486	NM_145055	ENSG00000152242	C18orf25	ARKL1|Ark2N|RNF111L1	chromosome 18 open reading frame 25	protein-coding
9_siCtrl_WDR5_peak_14561	chr6	31587802	31590035	+	4764	NA	intron (NM_080686, intron 1 of 30).7	CpG	426	NM_080686	7916	Hs.436093	NM_004638	ENSG00000204469	PRRC2A	BAT2|D6S51|D6S51E|G2	proline rich coiled-coil 2A	protein-coding
9_siCtrl_WDR5_peak_17817	chr9	134268441	134271002	+	4713	NA	Intergenic	Intergenic	-35756	NM_013318	84726	Hs.743955	NM_013318	ENSG00000130723	PRRC2B	BAT2L|BAT2L1|KIAA0515|LQFBS-1	proline rich coiled-coil 2B	protein-coding
9_siCtrl_WDR5_peak_5377	chr14	102275834	102276878	+	4708	NA	exon (NM_002719, exon 1 of 14)	exon (NM_002719, exon 1 of 14)	156	NM_001352912	5527	Hs.368264	NM_002719	ENSG00000078304	PPP2R5C	B56G|B56gamma|PR61G	protein phosphatase 2 regulatory subunit B'gamma	protein-coding
9_siCtrl_WDR5_peak_79	chr1	10531642	10532841	+	4688	NA	intron (NM_213566, intron 1 of 4)	CpG	345	NM_213566	1676	Hs.484782	NM_004401	ENSG00000160049	DFFA	DFF-45|DFF1|ICAD	DNA fragmentation factor subunit alpha	protein-coding
9_siCtrl_WDR5_peak_9631	chr2	62114596	62116430	+	4672	NA	promoter-TSS (NM_001321782)	promoter-TSS (NM_001321782)	278	NM_006430	10575	Hs.421509	NM_006430	ENSG00000115484	CCT4	CCT-DELTA|Cctd|SRB	chaperonin containing TCP1 subunit 4	protein-coding
9_siCtrl_WDR5_peak_6230	chr16	2316921	2318889	+	4670	NA	promoter-TSS (NM_001286625)	promoter-TSS (NM_001286625)	-18	NM_006711	10921	Hs.355643	NM_006711	ENSG00000205937	RNPS1	E5.1	RNA binding protein with serine rich domain 1	protein-coding
9_siCtrl_WDR5_peak_8349	chr19	3984059	3985857	+	4658	NA	intron (NM_001961, intron 1 of 14)	intron (NM_001961, intron 1 of 14)	503	NM_001961	1938	Hs.515070	NM_001961	ENSG00000167658	EEF2	EEF-2|EF-2|EF2|SCA26	eukaryotic translation elongation factor 2	protein-coding
9_siCtrl_WDR5_peak_5587	chr15	43985465	43987338	+	4656	NA	intron (NM_001015001, intron 2 of 9)	CpG	263	NM_001321929	548596	Hs.654988	NM_001015001	ENSG00000223572	CKMT1A	CKMT1|U-MtCK|mia-CK	creatine kinase, mitochondrial 1A	protein-coding
9_siCtrl_WDR5_peak_4652	chr13	44765331	44766728	+	4652	NA	Intergenic	Intergenic	4307	NR_107046	102465876		NR_107046	ENSG00000276319	MIR8079	hsa-mir-8079	microRNA 8079	ncRNA
9_siCtrl_WDR5_peak_6221	chr16	2013617	2015470	+	4634	NA	promoter-TSS (NR_003142)	promoter-TSS (NR_003142)	284	NM_002952	6187	Hs.356366	NM_002952	ENSG00000140988	RPS2	LLREP3|S2	ribosomal protein S2	protein-coding
9_siCtrl_WDR5_peak_9190	chr2	3622227	3624075	+	4591	NA	intron (NM_001011, intron 1 of 6)	CpG	301	NM_001011	6201	Hs.534346	NM_001011	ENSG00000171863	RPS7	DBA8|S7|eS7	ribosomal protein S7	protein-coding
9_siCtrl_WDR5_peak_11683	chr3	12881634	12883549	+	4588	NA	promoter-TSS (NR_002582)	promoter-TSS (NR_002582)	473	NM_000994	6161	Hs.265174	NM_000994	ENSG00000144713	RPL32	L32|PP9932	ribosomal protein L32	protein-coding
9_siCtrl_WDR5_peak_12278	chr3	132377452	132379661	+	4574	NA	promoter-TSS (NM_001321238)	promoter-TSS (NM_001321238)	97	NM_032169	84129	Hs.441378	NM_032169	ENSG00000240303	ACAD11	ACAD-11	acyl-CoA dehydrogenase family member 11	protein-coding
9_siCtrl_WDR5_peak_6798	chr16	89626498	89628341	+	4529	NA	promoter-TSS (NR_002450)	promoter-TSS (NR_002450)	300	NM_033251	6137	Hs.410817	NM_000977	ENSG00000167526	RPL13	BBC1|D16S444E|D16S44E|L13	ribosomal protein L13	protein-coding
9_siCtrl_WDR5_peak_667	chr1	93297049	93298676	+	4491	NA	TTS (NM_001252273)	TTS (NM_001252273)	265	NM_000969	6125	Hs.532359	NM_000969	ENSG00000122406	RPL5	L5|MSTP030|PPP1R135|uL18	ribosomal protein L5	protein-coding
9_siCtrl_WDR5_peak_8353	chr19	4246598	4247426	+	4467	NA	promoter-TSS (NM_018074)	promoter-TSS (NM_018074)	-65	NM_018074	55702	Hs.21811	NM_018074	ENSG00000105248	YJU2	CCDC94	YJU2 splicing factor homolog	protein-coding
9_siCtrl_WDR5_peak_3875	chr12	56367020	56368327	+	4465	NA	promoter-TSS (NM_001252036)	promoter-TSS (NM_001252036)	-24	NM_001252036	5869	Hs.157659	NM_002868	ENSG00000111540	RAB5B	-	RAB5B, member RAS oncogene family	protein-coding
9_siCtrl_WDR5_peak_14876	chr6	88410536	88412400	+	4464	NA	5' UTR (NM_018064, exon 1 of 5)	5' UTR (NM_018064, exon 1 of 5)	483	NM_018064	55122	Hs.485915	NM_018064	ENSG00000135334	AKIRIN2	C6orf166|FBI1|dJ486L4.2	akirin 2	protein-coding
9_siCtrl_WDR5_peak_8537	chr19	14116277	14118042	+	4423	NA	promoter-TSS (NM_002918)	promoter-TSS (NM_002918)	-27	NM_002918	5989	Hs.655215	NM_002918	ENSG00000132005	RFX1	EFC|RFX	regulatory factor X1	protein-coding
9_siCtrl_WDR5_peak_9417	chr2	32264407	32265665	+	4411	NA	promoter-TSS (NR_135587)	promoter-TSS (NR_135587)	-132	NR_135587	84661	Hs.531788	NM_032574	ENSG00000162961	DPY30	Cps25|HDPY-30|Saf19	dpy-30 histone methyltransferase complex regulatory subunit	protein-coding
9_siCtrl_WDR5_peak_6338	chr16	14013212	14013883	+	4362	NA	promoter-TSS (NM_005236)	promoter-TSS (NM_005236)	-467	NM_005236	2072	Hs.567265	NM_005236	ENSG00000175595	ERCC4	ERCC11|FANCQ|RAD1|XFEPS|XPF	ERCC excision repair 4, endonuclease catalytic subunit	protein-coding
9_siCtrl_WDR5_peak_10475	chr2	220082775	220084958	+	4342	NA	promoter-TSS (NM_005689)	promoter-TSS (NM_005689)	-186	NM_005689	10058	Hs.107911	NM_005689	ENSG00000115657	ABCB6	ABC|LAN|MTABC3|PRP|umat	ATP binding cassette subfamily B member 6 (Langereis blood group)	protein-coding
9_siCtrl_WDR5_peak_7700	chr17	72199207	72201158	+	4339	NA	intron (NM_000999, intron 2 of 4)	CpG-11066	365	NM_000999	6169	Hs.380953	NM_000999	ENSG00000172809	RPL38	L38	ribosomal protein L38	protein-coding
9_siCtrl_WDR5_peak_11426	chr22	32148928	32150585	+	4304	NA	promoter-TSS (NM_014662)	promoter-TSS (NM_014662)	-198	NM_001363852	9681	Hs.435022	NM_014662	ENSG00000100150	DEPDC5	DEP.5|FFEVF|FFEVF1	DEP domain containing 5	protein-coding
9_siCtrl_WDR5_peak_9326	chr2	24297727	24299441	+	4292	NA	intron (NM_016047, intron 1 of 3)	L2a|LINE|L2	612	NM_016047	51639	Hs.177861	NM_016047	ENSG00000115128	SF3B6	CGI-110|HSPC175|Ht006|P14|SAP14|SAP14a|SF3B14|SF3B14a	splicing factor 3b subunit 6	protein-coding
9_siCtrl_WDR5_peak_8410	chr19	7894447	7895290	+	4263	NA	promoter-TSS (NM_145245)	promoter-TSS (NM_145245)	-236	NM_145245	115704	Hs.26870	NM_145245	ENSG00000142459	EVI5L	-	ecotropic viral integration site 5 like	protein-coding
9_siCtrl_WDR5_peak_2658	chr11	1403209	1405239	+	4256	NA	Intergenic	CpG	-6940	NM_003957	9024	Hs.170819	NM_003957	ENSG00000174672	BRSK2	C11orf7|PEN11B|SAD1|SADA|STK29	BR serine/threonine kinase 2	protein-coding
9_siCtrl_WDR5_peak_11819	chr3	40565579	40567340	+	4251	NA	promoter-TSS (NM_198484)	promoter-TSS (NM_198484)	8	NM_001098414	285268	Hs.19977	NM_198484	ENSG00000172888	ZNF621	-	zinc finger protein 621	protein-coding
9_siCtrl_WDR5_peak_14243	chr5	179233685	179235118	+	4251	NA	promoter-TSS (NM_014275)	promoter-TSS (NM_014275)	392	NM_001142299	8878	Hs.587290	NM_003900	ENSG00000161011	SQSTM1	A170|DMRV|FTDALS3|NADGP|OSIL|PDB3|ZIP3|p60|p62|p62B	sequestosome 1	protein-coding
9_siCtrl_WDR5_peak_3834	chr12	53772865	53774605	+	4210	NA	promoter-TSS (NM_003109)	promoter-TSS (NM_003109)	-225	NM_001251825	6667	Hs.620754	NM_003109	ENSG00000185591	SP1	-	Sp1 transcription factor	protein-coding
9_siCtrl_WDR5_peak_17840	chr9	136282682	136284367	+	4207	NA	promoter-TSS (NM_001279350)	promoter-TSS (NM_001279350)	-232	NM_001279351	57109	Hs.438409	NM_020385	ENSG00000148300	REXO4	REX4|XPMC2|XPMC2H	REX4 homolog, 3'-5' exonuclease	protein-coding
9_siCtrl_WDR5_peak_17982	chrX	46988031	46989901	+	4176	NA	Intergenic	Intergenic	15643	NM_019056	54539	Hs.521969	NM_019056	ENSG00000147123	NDUFB11	CI-ESSS|ESSS|MC1DN30|NP17.3|Np15|P17.3	NADH:ubiquinone oxidoreductase subunit B11	protein-coding
9_siCtrl_WDR5_peak_14618	chr6	34392284	34394684	+	4164	NA	intron (NM_001202470, intron 1 of 8)	CpG	362	NM_001204091	6204	Hs.406620	NM_001014	ENSG00000124614	RPS10	DBA9|S10	ribosomal protein S10	protein-coding
9_siCtrl_WDR5_peak_17744	chr9	130660834	130662288	+	4125	NA	intron (NM_001286999, intron 1 of 6)	CpG	366	NM_013443	30815	Hs.109672	NM_013443	ENSG00000160408	ST6GALNAC6	SIAT7-F|SIAT7F|ST6GALNACVI	ST6 N-acetylgalactosaminide alpha-2,6-sialyltransferase 6	protein-coding
9_siCtrl_WDR5_peak_11045	chr20	56784058	56785211	+	4099	NA	Intergenic	Intergenic	19075	NM_001304369	140731	Hs.266571	NM_080674	ENSG00000124227	ANKRD60	C20orf86|bA196N14.3	ankyrin repeat domain 60	protein-coding
9_siCtrl_WDR5_peak_18068	chrX	71458292	71459862	+	4089	NA	promoter-TSS (NM_017669)	promoter-TSS (NM_017669)	-200	NM_001009954	54821	Hs.47558	NM_017669	ENSG00000186871	ERCC6L	PICH|RAD26L	ERCC excision repair 6 like, spindle assembly checkpoint helicase	protein-coding
9_siCtrl_WDR5_peak_136	chr1	21502479	21503560	+	4036	NA	intron (NM_001198801, intron 1 of 34)	G-rich|Low_complexity|Low_complexity	371	NM_001198802	8672	Hs.467084	NM_003760	ENSG00000075151	EIF4G3	eIF-4G 3|eIF4G 3|eIF4GII	eukaryotic translation initiation factor 4 gamma 3	protein-coding
9_siCtrl_WDR5_peak_2700	chr11	9481703	9483240	+	4025	NA	promoter-TSS (NR_036539)	promoter-TSS (NR_036539)	-41	NM_001282656	7702	Hs.523471	NM_003442	ENSG00000166478	ZNF143	SBF|STAF|pHZ-1	zinc finger protein 143	protein-coding
9_siCtrl_WDR5_peak_7231	chr17	41148982	41152062	+	4012	NA	promoter-TSS (NR_146327)	promoter-TSS (NR_146327)	86	NM_000988	6155	Hs.514196	NM_000988	ENSG00000131469	RPL27	DBA16|L27	ribosomal protein L27	protein-coding
9_siCtrl_WDR5_peak_7953	chr18	8706745	8708264	+	3998	NA	non-coding (NR_120598, exon 1 of 2)	non-coding (NR_120598, exon 1 of 2)	115	NR_120598	100287082	Hs.439434	NR_120598	ENSG00000265962	GACAT2	MTCL1-AS1|MTCL1AS1	gastric cancer associated transcript 2	ncRNA
9_siCtrl_WDR5_peak_7049	chr17	26368115	26369397	+	3969	NA	promoter-TSS (NM_016231)	promoter-TSS (NM_016231)	-947	NM_016231	51701	Hs.208759	NM_016231	ENSG00000087095	NLK	-	nemo like kinase	protein-coding
9_siCtrl_WDR5_peak_11279	chr21	48081196	48082278	+	3965	NA	TTS (NM_001242866)	TTS (NM_001242866)	26151	NM_001242866	3275	Hs.154163	NM_001535	ENSG00000160310	PRMT2	HRMT1L1	protein arginine methyltransferase 2	protein-coding
9_siCtrl_WDR5_peak_8790	chr19	39339733	39341280	+	3957	NA	exon (NM_001533, exon 1 of 13)	exon (NM_001533, exon 1 of 13)	111	NM_001533	3191	Hs.644906	NM_001533	ENSG00000104824	HNRNPL	HNRPL|P/OKcl.14|hnRNP-L	heterogeneous nuclear ribonucleoprotein L	protein-coding
9_siCtrl_WDR5_peak_3613	chr12	21926352	21928134	+	3956	NA	intron (NM_004982, intron 1 of 2)	intron (NM_004982, intron 1 of 2)	397	NM_004982	3764	Hs.102308	NM_004982	ENSG00000121361	KCNJ8	KIR6.1|uKATP-1	potassium voltage-gated channel subfamily J member 8	protein-coding
9_siCtrl_WDR5_peak_546	chr1	67894644	67897079	+	3894	NA	exon (NM_015640, exon 1 of 8)	exon (NM_015640, exon 1 of 8)	224	NM_001018068	26135	Hs.530412	NM_015640	ENSG00000142864	SERBP1	CGI-55|CHD3IP|HABP4L|PAI-RBP1|PAIRBP1	SERPINE1 mRNA binding protein 1	protein-coding
9_siCtrl_WDR5_peak_7343	chr17	45972619	45974515	+	3881	NA	promoter-TSS (NR_135480)	promoter-TSS (NR_135480)	-35	NM_003110	6668	Hs.514276	NM_003110	ENSG00000167182	SP2	-	Sp2 transcription factor	protein-coding
9_siCtrl_WDR5_peak_5976	chr15	80695521	80697888	+	3861	NA	promoter-TSS (NM_014862)	promoter-TSS (NM_014862)	-20	NM_014862	9915	Hs.459070	NM_014862	ENSG00000172379	ARNT2	WEDAS|bHLHe1	aryl hydrocarbon receptor nuclear translocator 2	protein-coding
9_siCtrl_WDR5_peak_5923	chr15	75743434	75747675	+	3842	NA	intron (NM_001145357, intron 1 of 20)	CpG-8103	-1523	NM_015477	25942	Hs.513039	NM_015477	ENSG00000169375	SIN3A	WITKOS	SIN3 transcription regulator family member A	protein-coding
9_siCtrl_WDR5_peak_16257	chr7	139024636	139026954	+	3727	NA	promoter-TSS (NM_197964)	promoter-TSS (NM_197964)	-83	NM_001244584	100996928	Hs.731488	NM_001244584	ENSG00000269955	FMC1-LUC7L2	C7orf55|C7orf55-LUC7L2|FMC1	FMC1-LUC7L2 readthrough	protein-coding
9_siCtrl_WDR5_peak_9340	chr2	25895560	25897363	+	3708	NA	promoter-TSS (NM_001351392)	promoter-TSS (NM_001351392)	-15	NM_001320937	1838	Hs.307720	NM_021907	ENSG00000138101	DTNB	-	dystrobrevin beta	protein-coding
9_siCtrl_WDR5_peak_17409	chr9	73032908	73035065	+	3707	NA	Intergenic	CpG	-4413	NM_001206	687	Hs.150557	NM_001206	ENSG00000119138	KLF9	BTEB|BTEB1	Kruppel like factor 9	protein-coding
9_siCtrl_WDR5_peak_3145	chr11	73498245	73499819	+	3704	NA	exon (NM_016055, exon 1 of 8)	exon (NM_016055, exon 1 of 8)	113	NM_001318500	51642	Hs.503239	NM_016055	ENSG00000175581	MRPL48	CGI-118|HSPC290|L48MT|MRP-L48	mitochondrial ribosomal protein L48	protein-coding
9_siCtrl_WDR5_peak_7385	chr17	48227290	48230033	+	3660	NA	promoter-TSS (NM_032595)	promoter-TSS (NM_032595)	-623	NM_032595	84687	Hs.514323	NM_032595	ENSG00000108819	PPP1R9B	PPP1R6|PPP1R9|SPINO|Spn	protein phosphatase 1 regulatory subunit 9B	protein-coding
9_siCtrl_WDR5_peak_8303	chr19	1652576	1653236	+	3608	NA	promoter-TSS (NM_001351779)	promoter-TSS (NM_001351779)	-292	NM_003200	6929	Hs.371282	NM_003200	ENSG00000071564	TCF3	AGM8|E2A|E47|ITF1|TCF-3|VDIR|bHLHb21|p75	transcription factor 3	protein-coding
9_siCtrl_WDR5_peak_12255	chr3	128879618	128880628	+	3608	NA	promoter-TSS (NM_020701)	promoter-TSS (NM_020701)	-50	NM_001204890	100534599	Hs.512661	NM_001204890	ENSG00000261796	ISY1-RAB43	ISY1	ISY1-RAB43 readthrough	protein-coding
9_siCtrl_WDR5_peak_5803	chr15	67546501	67547859	+	3583	NA	promoter-TSS (NM_024666)	promoter-TSS (NM_024666)	42	NM_001284349	64799	Hs.657894	NM_022784	ENSG00000103599	IQCH	NYDSP5	IQ motif containing H	protein-coding
9_siCtrl_WDR5_peak_6205	chr16	1358672	1359498	+	3506	NA	promoter-TSS (NM_194261)	promoter-TSS (NM_194261)	-68	NM_194261	7329	Hs.302903	NM_003345	ENSG00000103275	UBE2I	C358B7.1|P18|UBC9	ubiquitin conjugating enzyme E2 I	protein-coding
9_siCtrl_WDR5_peak_13956	chr5	139780224	139782091	+	3492	NA	promoter-TSS (NM_017978)	promoter-TSS (NM_017978)	-242	NM_001197030	54882	Hs.594084	NM_017747	ENSG00000131503	ANKHD1	MASK|MASK1|PP2500|VBARP	ankyrin repeat and KH domain containing 1	protein-coding
9_siCtrl_WDR5_peak_11221	chr21	40759714	40760978	+	3485	NA	intron (NM_001146218, intron 1 of 4)	L1MC4|LINE|L1	657	NR_146616	7485	Hs.198308	NM_004627	ENSG00000182093	GET1	CHD5|WRB	guided entry of tail-anchored proteins factor 1	protein-coding
9_siCtrl_WDR5_peak_8397	chr19	6424667	6425957	+	3474	NA	promoter-TSS (NM_001366300)	promoter-TSS (NM_001366300)	-490	NM_001366299	8570	Hs.727344	NM_003685	ENSG00000088247	KHSRP	FBP2|FUBP2|KSRP|p75	KH-type splicing regulatory protein	protein-coding
9_siCtrl_WDR5_peak_2938	chr11	59382823	59384253	+	3471	NA	promoter-TSS (NM_002556)	promoter-TSS (NM_002556)	-291	NM_002556	5007	Hs.597091	NM_002556	ENSG00000110048	OSBP	OSBP1	oxysterol binding protein	protein-coding
9_siCtrl_WDR5_peak_8849	chr19	42772605	42773766	+	3463	NA	intron (NM_001304815, intron 1 of 20)	CpG	496	NM_001304815	23152	Hs.388236	NM_015125	ENSG00000079432	CIC	MRD45	capicua transcriptional repressor	protein-coding
9_siCtrl_WDR5_peak_16097	chr7	106808539	106810510	+	3458	NA	promoter-TSS (NM_012257)	promoter-TSS (NM_012257)	76	NM_012257	26959	Hs.162032	NM_012257	ENSG00000105856	HBP1	-	HMG-box transcription factor 1	protein-coding
9_siCtrl_WDR5_peak_7889	chr17	80230462	80232059	+	3406	NA	non-coding (NR_110578, exon 1 of 9)	non-coding (NR_110578, exon 1 of 9)	316	NM_001363749	1453	Hs.631725	NM_001893	ENSG00000141551	CSNK1D	ASPS|CKI-delta|CKId|CKIdelta|FASPS2|HCKID	casein kinase 1 delta	protein-coding
9_siCtrl_WDR5_peak_17976	chrX	41191860	41194309	+	3392	NA	promoter-TSS (NM_001193417)	promoter-TSS (NM_001193417)	-331	NM_001193417	1654	Hs.728563	NM_001356	ENSG00000215301	DDX3X	CAP-Rf|DBX|DDX14|DDX3|HLP2|MRX102	DEAD-box helicase 3 X-linked	protein-coding
9_siCtrl_WDR5_peak_13973	chr5	141262606	141264158	+	3366	NA	Intergenic	Intergenic	-5407	NM_032420	5097	Hs.79769	NM_002587	ENSG00000156453	PCDH1	PC42|PCDH42	protocadherin 1	protein-coding
9_siCtrl_WDR5_peak_17180	chr9	6703903	6705329	+	3336	NA	Intergenic	CpG	-16247	NM_001146696	23081	Hs.709425	NM_015061	ENSG00000107077	KDM4C	GASC1|JHDM3C|JMJD2C|TDRD14C	lysine demethylase 4C	protein-coding
9_siCtrl_WDR5_peak_2974	chr11	62438019	62439646	+	3310	NA	promoter-TSS (NM_001085372)	promoter-TSS (NM_001085372)	-313	NM_001085372	790955	Hs.569009	NM_001085372	ENSG00000204922	UQCC3	C11orf83|CCDS41658.1|MC3DN9|UNQ655	ubiquinol-cytochrome c reductase complex assembly factor 3	protein-coding
9_siCtrl_WDR5_peak_17749	chr9	130829353	130830295	+	3280	NA	promoter-TSS (NM_197956)	promoter-TSS (NM_197956)	-225	NM_197956	203245	Hs.373606	NM_197956	ENSG00000171169	NAIF1	C9orf90|bA379C10.2	nuclear apoptosis inducing factor 1	protein-coding
9_siCtrl_WDR5_peak_8615	chr19	19029923	19030906	+	3270	NA	promoter-TSS (NR_033677)	promoter-TSS (NR_033677)	-110	NR_033677	54555	Hs.143187	NM_019070	ENSG00000105671	DDX49	Dbp8|R27090_2	DEAD-box helicase 49	protein-coding
9_siCtrl_WDR5_peak_5538	chr15	40615260	40615945	+	3241	NA	promoter-TSS (NM_001301268)	promoter-TSS (NM_001301268)	-291	NM_001301268	100505573	Hs.530791	NM_001301268	ENSG00000259330	INAFM2	LINC00984|OGU1	InaF motif containing 2	protein-coding
9_siCtrl_WDR5_peak_11220	chr21	40719994	40721840	+	3211	NA	promoter-TSS (NM_004965)	promoter-TSS (NM_004965)	97	NM_004965	3150	Hs.356285	NM_004965	ENSG00000205581	HMGN1	HMG14	high mobility group nucleosome binding domain 1	protein-coding
9_siCtrl_WDR5_peak_3528	chr12	6960030	6962113	+	3210	NA	promoter-TSS (NM_003481)	promoter-TSS (NM_003481)	23	NR_138531	83461	Hs.524216	NM_031299	ENSG00000111665	CDCA3	GRCC8|TOME-1	cell division cycle associated 3	protein-coding
9_siCtrl_WDR5_peak_1020	chr1	154955344	154956512	+	3193	NA	5' UTR (NM_025207, exon 1 of 7)	5' UTR (NM_025207, exon 1 of 7)	108	NM_001184891	80308	Hs.118666	NM_025207	ENSG00000160688	FLAD1	FAD1|FADS|LSMFLAD|PP591	flavin adenine dinucleotide synthetase 1	protein-coding
9_siCtrl_WDR5_peak_972	chr1	151253624	151255426	+	3190	NA	promoter-TSS (NR_135595)	promoter-TSS (NR_135595)	-120	NR_135595	100507670	Hs.225083	NR_135595	ENSG00000232671	ZNF687-AS1	-	ZNF687 antisense RNA 1	ncRNA
9_siCtrl_WDR5_peak_8369	chr19	4791312	4792042	+	3174	NA	promoter-TSS (NM_018708)	promoter-TSS (NM_018708)	-69	NM_018708	55527	Hs.515082	NM_018708	ENSG00000141965	FEM1A	EPRAP	fem-1 homolog A	protein-coding
9_siCtrl_WDR5_peak_7005	chr17	17875304	17876378	+	3172	NA	promoter-TSS (NM_001350332)	promoter-TSS (NM_001350332)	-127	NM_001350333	146691	Hs.462379	NM_144678	ENSG00000175662	TOM1L2	-	target of myb1 like 2 membrane trafficking protein	protein-coding
9_siCtrl_WDR5_peak_4097	chr12	93964154	93967569	+	3131	NA	promoter-TSS (NR_038263)	promoter-TSS (NR_038263)	225	NM_001270469	8835	Hs.485572	NM_003877	ENSG00000120833	SOCS2	CIS2|Cish2|SOCS-2|SSI-2|SSI2|STATI2	suppressor of cytokine signaling 2	protein-coding
9_siCtrl_WDR5_peak_3519	chr12	6771858	6772777	+	3089	NA	promoter-TSS (NM_001127584)	promoter-TSS (NM_001127584)	-32	NM_001127582	51147	Hs.524210	NM_016162	ENSG00000111653	ING4	my036|p29ING4	inhibitor of growth family member 4	protein-coding
9_siCtrl_WDR5_peak_16874	chr8	94928515	94931124	+	3065	NA	intron (NM_001161781, intron 1 of 1)	CpG	644	NM_001161779	54704	Hs.22265	NM_018444	ENSG00000164951	PDP1	PDH|PDP|PDPC|PPM2A|PPM2C	pyruvate dehyrogenase phosphatase catalytic subunit 1	protein-coding
9_siCtrl_WDR5_peak_4283	chr12	113622604	113624282	+	3063	NA	promoter-TSS (NM_001111322)	promoter-TSS (NM_001111322)	-83	NM_032848	84934	Hs.524762	NM_032848	ENSG00000139405	RITA1	C12orf52|RITA	RBPJ interacting and tubulin associated 1	protein-coding
9_siCtrl_WDR5_peak_648	chr1	90460217	90461448	+	3048	NA	promoter-TSS (NR_002830)	promoter-TSS (NR_002830)	163	NM_001320185	284695	Hs.306221	NM_181781	ENSG00000162664	ZNF326	ZAN75|ZIRD|Zfp326|dJ871E2.1	zinc finger protein 326	protein-coding
9_siCtrl_WDR5_peak_10915	chr20	44485636	44486631	+	3041	NA	promoter-TSS (NR_037628)	promoter-TSS (NR_037628)	-87	NR_037628	140831	Hs.292135	NM_080752	ENSG00000132801	ZSWIM3	C20orf164|PPP1R174	zinc finger SWIM-type containing 3	protein-coding
9_siCtrl_WDR5_peak_16399	chr8	2590952	2592125	+	2998	NA	Intergenic	LTR60|LTR|ERV1	-5547	NR_125425	101927815	Hs.571467	NR_125423	ENSG00000254319	LOC101927815	-	uncharacterized LOC101927815	ncRNA
9_siCtrl_WDR5_peak_10785	chr20	30310464	30312156	+	2974	NA	promoter-TSS (NM_138578)	promoter-TSS (NM_138578)	456	NM_001322240	598	Hs.516966	NM_001191	ENSG00000171552	BCL2L1	BCL-XL/S|BCL2L|BCLX|Bcl-X|PPP1R52	BCL2 like 1	protein-coding
9_siCtrl_WDR5_peak_3417	chr11	125461740	125463238	+	2968	NA	promoter-TSS (NR_132372)	promoter-TSS (NR_132372)	-26	NR_132372	105369550	Hs.732083	NR_132372	ENSG00000149557	STT3A-AS1	-	STT3A antisense RNA 1	ncRNA
9_siCtrl_WDR5_peak_1214	chr1	173793211	173794909	+	2943	NA	promoter-TSS (NM_001127181)	promoter-TSS (NM_001127181)	249	NM_018122	55157	Hs.647707	NM_018122	ENSG00000117593	DARS2	ASPRS|LBSL|MT-ASPRS|mtAspRS	aspartyl-tRNA synthetase 2, mitochondrial	protein-coding
9_siCtrl_WDR5_peak_15970	chr7	92861169	92862205	+	2897	NA	promoter-TSS (NM_017667)	promoter-TSS (NM_017667)	8	NM_017667	55610	Hs.202424	NM_017667	ENSG00000004766	VPS50	CCDC132|VPS54L	VPS50 subunit of EARP/GARPII complex	protein-coding
9_siCtrl_WDR5_peak_1051	chr1	155903648	155905286	+	2892	NA	promoter-TSS (NM_014949)	promoter-TSS (NM_014949)	-263	NM_014949	22889	Hs.24656	NM_014949	ENSG00000132680	KHDC4	BLOM7|KIAA0907|SNORA80EHG	KH domain containing 4, pre-mRNA splicing factor	protein-coding
9_siCtrl_WDR5_peak_1395	chr1	203830368	203831493	+	2885	NA	promoter-TSS (NM_001328638)	promoter-TSS (NM_001328638)	-45	NM_001328638	6635	Hs.334612	NM_003094	ENSG00000182004	SNRPE	HYPT11|SME|Sm-E|snRNP-E	small nuclear ribonucleoprotein polypeptide E	protein-coding
9_siCtrl_WDR5_peak_6629	chr16	57768776	57770007	+	2883	NA	promoter-TSS (NM_005886)	promoter-TSS (NM_005886)	-291	NM_005886	10300	Hs.275675	NM_005886	ENSG00000140854	KATNB1	KAT|LIS6	katanin regulatory subunit B1	protein-coding
9_siCtrl_WDR5_peak_7003	chr17	17738821	17740232	+	2880	NA	intron (NM_001005291, intron 1 of 19)	CpG	774	NM_001005291	6720	Hs.592123	NM_004176	ENSG00000072310	SREBF1	SREBP1|bHLHd1	sterol regulatory element binding transcription factor 1	protein-coding
9_siCtrl_WDR5_peak_12674	chr4	7378879	7379730	+	2847	NA	intron (NM_020777, intron 1 of 26)	intron (NM_020777, intron 1 of 26)	57353	NM_001085382	768239	Hs.662523	NM_001085382	ENSG00000178597	PSAPL1	-	prosaposin like 1 (gene/pseudogene)	protein-coding
9_siCtrl_WDR5_peak_13941	chr5	138629278	138630723	+	2825	NA	intron (NM_001194956, intron 1 of 13)	CpG	561	NM_001194956	9782	Hs.268939	NM_018834	ENSG00000015479	MATR3	ALS21|MPD2|VCPDM	matrin 3	protein-coding
9_siCtrl_WDR5_peak_12813	chr4	48781036	48783035	+	2820	NA	intron (NM_015030, intron 1 of 63)	CpG	281	NM_015030	285527	Hs.595553	NM_015030	ENSG00000075539	FRYL	AF4p12|KIAA0826|MOR2	FRY like transcription coactivator	protein-coding
9_siCtrl_WDR5_peak_14260	chr5	180673030	180674345	+	2814	NA	non-coding (NR_109909, exon 1 of 3)	non-coding (NR_109909, exon 1 of 3)	146	NR_109909	101928649	Hs.723307	NR_109909		CTC-338M12.4	-	uncharacterized LOC101928649	ncRNA
9_siCtrl_WDR5_peak_7846	chr17	79212457	79213685	+	2813	NA	promoter-TSS (NM_001353403)	promoter-TSS (NM_001353403)	-40	NM_001353402	284184	Hs.356545	NM_001086521	ENSG00000224877	NDUFAF8	C17orf89	NADH:ubiquinone oxidoreductase complex assembly factor 8	protein-coding
9_siCtrl_WDR5_peak_12858	chr4	57252837	57254002	+	2807	NA	intron (NM_001286672, intron 1 of 10)	intron (NM_001286672, intron 1 of 10)	238	NM_001323899	132949	Hs.104347	NM_181806	ENSG00000157426	AASDH	ACSF4|LYS2|NRPS1098|NRPS998	aminoadipate-semialdehyde dehydrogenase	protein-coding
9_siCtrl_WDR5_peak_10237	chr2	178256501	178257945	+	2804	NA	promoter-TSS (NM_003659)	promoter-TSS (NM_003659)	196	NR_026966	100130691	Hs.707723	NM_182585	ENSG00000213963	LOC100130691	-	uncharacterized LOC100130691	ncRNA
9_siCtrl_WDR5_peak_349	chr1	51425040	51426455	+	2801	NA	5' UTR (NM_007051, exon 1 of 19)	5' UTR (NM_007051, exon 1 of 19)	192	NM_007051	11124	Hs.530402	NM_007051	ENSG00000185104	FAF1	CGI-03|HFAF1s|UBXD12|UBXN3A|hFAF1	Fas associated factor 1	protein-coding
9_siCtrl_WDR5_peak_14159	chr5	170814751	170816092	+	2791	NA	intron (NM_001355010, intron 1 of 6)	CpG	568	NM_001037738	4869	Hs.557550	NM_002520	ENSG00000181163	NPM1	B23|NPM	nucleophosmin 1	protein-coding
9_siCtrl_WDR5_peak_14909	chr6	91386911	91387599	+	2784	NA	Intergenic	Intergenic	-90464	NM_145332	6885	Hs.594838	NM_003188	ENSG00000135341	MAP3K7	CSCF|FMD2|MEKK7|TAK1|TGF1a	mitogen-activated protein kinase kinase kinase 7	protein-coding
9_siCtrl_WDR5_peak_11487	chr22	39267270	39268315	+	2783	NA	intron (NM_014292, intron 2 of 4)	CpG-17840	429	NM_001303494	23466	Hs.592201	NM_014292	ENSG00000183741	CBX6	-	chromobox 6	protein-coding
9_siCtrl_WDR5_peak_17112	chr8	145158338	145160011	+	2779	NA	promoter-TSS (NM_030974)	promoter-TSS (NM_030974)	-190	NM_032272	84232	Hs.19673	NM_032272	ENSG00000179632	MAF1	-	MAF1 homolog, negative regulator of RNA polymerase III	protein-coding
9_siCtrl_WDR5_peak_4491	chr12	133613656	133615231	+	2732	NA	promoter-TSS (NR_110091)	promoter-TSS (NR_110091)	275	NM_001289972	7637	Hs.445019	NM_003428	ENSG00000198040	ZNF84	HPF2	zinc finger protein 84	protein-coding
9_siCtrl_WDR5_peak_3506	chr12	4647287	4648429	+	2731	NA	promoter-TSS (NM_001130862)	promoter-TSS (NM_001130862)	-184	NM_001346153	57102	Hs.302977	NM_020374	ENSG00000047621	C12orf4	-	chromosome 12 open reading frame 4	protein-coding
9_siCtrl_WDR5_peak_12261	chr3	129117214	129118689	+	2727	NA	non-coding (NR_003111, exon 1 of 4)	non-coding (NR_003111, exon 1 of 4)	331	NR_003111	132241	Hs.477537	NR_003111	ENSG00000251474	RPL32P3	-	ribosomal protein L32 pseudogene 3	pseudo
9_siCtrl_WDR5_peak_3022	chr11	64794806	64795549	+	2727	NA	intron (NM_013306, intron 1 of 7)	CpG	266	NM_147777	29907	Hs.80132	NM_013306	ENSG00000110025	SNX15	HSAF001435	sorting nexin 15	protein-coding
9_siCtrl_WDR5_peak_3752	chr12	46660521	46663271	+	2724	NA	promoter-TSS (NM_001278390)	promoter-TSS (NM_001278390)	-126	NM_001278390	81539	Hs.533770	NM_030674	ENSG00000111371	SLC38A1	ATA1|NAT2|SAT1|SNAT1	solute carrier family 38 member 1	protein-coding
9_siCtrl_WDR5_peak_6217	chr16	1832213	1833399	+	2716	NA	promoter-TSS (NR_104318)	promoter-TSS (NR_104318)	-155	NR_104318	10101	Hs.256549	NM_012225	ENSG00000095906	NUBP2	CFD1|CIAO6|NBP 2|NUBP1	nucleotide binding protein 2	protein-coding
9_siCtrl_WDR5_peak_4553	chr13	28194283	28195897	+	2704	NA	promoter-TSS (NM_015972)	promoter-TSS (NM_015972)	210	NM_001206559	51082	Hs.507584	NM_015972	ENSG00000186184	POLR1D	AC19|POLR1C|RPA16|RPA9|RPAC2|RPC16|RPO1-3|TCS2	RNA polymerase I and III subunit D	protein-coding
9_siCtrl_WDR5_peak_12598	chr3	197463399	197464848	+	2685	NA	promoter-TSS (NM_014687)	promoter-TSS (NM_014687)	-326	NM_001346873	9711	Hs.478868	NM_014687	ENSG00000145016	RUBCN	KIAA0226|RUBICON|SCAR15	rubicon autophagy regulator	protein-coding
9_siCtrl_WDR5_peak_1619	chr1	225839734	225841986	+	2682	NA	promoter-TSS (NM_018212)	promoter-TSS (NM_018212)	-35	NM_018212	55740	Hs.497893	NM_018212	ENSG00000154380	ENAH	ENA|MENA|NDPP1	ENAH actin regulator	protein-coding
9_siCtrl_WDR5_peak_5856	chr15	70678728	70679670	+	2664	NA	Intergenic	Intergenic	119068	NR_146562	105370880		NR_146562	ENSG00000259473	LINC02205	-	long intergenic non-protein coding RNA 2205	ncRNA
9_siCtrl_WDR5_peak_17833	chr9	135905550	135906847	+	2656	NA	promoter-TSS (NR_135119)	promoter-TSS (NR_135119)	136	NM_001286709	9328	Hs.495417	NM_012087	ENSG00000148308	GTF3C5	TFIIIC63|TFIIICepsilon|TFiiiC2-63	general transcription factor IIIC subunit 5	protein-coding
9_siCtrl_WDR5_peak_1102	chr1	160369287	160370918	+	2637	NA	promoter-TSS (NM_020335)	promoter-TSS (NM_020335)	-252	NM_020335	57216	Hs.99477	NM_020335	ENSG00000162738	VANGL2	LPP1|LTAP|STB1|STBM|STBM1	VANGL planar cell polarity protein 2	protein-coding
9_siCtrl_WDR5_peak_10554	chr2	237086682	237088747	+	2621	NA	Intergenic	CpG	-10685	NM_001485	2637	Hs.184945	NM_001485	ENSG00000168505	GBX2	-	gastrulation brain homeobox 2	protein-coding
9_siCtrl_WDR5_peak_6631	chr16	58162684	58163881	+	2618	NA	promoter-TSS (NR_136632)	promoter-TSS (NR_136632)	3	NM_013242	29105	Hs.532755	NM_013242	ENSG00000070761	CFAP20	BUG22|C16orf80|EVORF|GTL3|fSAP23	cilia and flagella associated protein 20	protein-coding
9_siCtrl_WDR5_peak_15264	chr6	153303191	153305917	+	2617	NA	promoter-TSS (NM_012177)	promoter-TSS (NM_012177)	160	NM_001142522	26271	Hs.520506	NM_012177	ENSG00000112029	FBXO5	EMI1|FBX5|Fbxo31	F-box protein 5	protein-coding
9_siCtrl_WDR5_peak_6954	chr17	11900128	11901687	+	2609	NA	promoter-TSS (NM_144680)	promoter-TSS (NM_144680)	-80	NM_001303282	7566	Hs.370473	NM_144680	ENSG00000154957	ZNF18	HDSG1|KOX11|ZKSCAN6|ZNF535|ZSCAN38|Zfp535	zinc finger protein 18	protein-coding
9_siCtrl_WDR5_peak_14025	chr5	150137690	150139033	+	2608	NA	promoter-TSS (NM_001135644)	promoter-TSS (NM_001135644)	-279	NM_001135644	51164	Hs.675564	NM_016221	ENSG00000132912	DCTN4	DYN4|P62	dynactin subunit 4	protein-coding
9_siCtrl_WDR5_peak_15912	chr7	77427187	77428657	+	2578	NA	promoter-TSS (NM_001366087)	promoter-TSS (NM_001366087)	-168	NM_001127358	57157	Hs.203965	NM_020432	ENSG00000006576	PHTF2	-	putative homeodomain transcription factor 2	protein-coding
9_siCtrl_WDR5_peak_16469	chr8	18869860	18871289	+	2568	NA	intron (NM_015310, intron 1 of 15)	intron (NM_015310, intron 1 of 15)	639	NM_015310	23362	Hs.434255	NM_015310	ENSG00000156011	PSD3	EFA6D|EFA6R|HCA67	pleckstrin and Sec7 domain containing 3	protein-coding
9_siCtrl_WDR5_peak_9088	chr19	56825729	56826853	+	2552	NA	promoter-TSS (NM_001322066)	promoter-TSS (NM_001322066)	-83	NM_001322064	79149	Hs.177688	NM_024303	ENSG00000131848	ZSCAN5A	ZNF495|ZSCAN5	zinc finger and SCAN domain containing 5A	protein-coding
9_siCtrl_WDR5_peak_8886	chr19	45393495	45395083	+	2550	NA	promoter-TSS (NM_001128917)	promoter-TSS (NM_001128917)	-188	NM_001128916	10452	Hs.655909	NM_006114	ENSG00000130204	TOMM40	C19orf1|D19S1177E|PER-EC1|PEREC1|TOM40	translocase of outer mitochondrial membrane 40	protein-coding
9_siCtrl_WDR5_peak_4264	chr12	112035779	112038168	+	2505	NA	promoter-TSS (NR_146497)	promoter-TSS (NR_146497)	146	NM_002973	6311	Hs.76253	NM_002973	ENSG00000204842	ATXN2	ATX2|SCA2|TNRC13	ataxin 2	protein-coding
9_siCtrl_WDR5_peak_7572	chr17	61627034	61628823	+	2490	NA	promoter-TSS (NM_005828)	promoter-TSS (NM_005828)	90	NM_005828	10238	Hs.410596	NM_005828	ENSG00000136485	DCAF7	AN11|HAN11|SWAN-1|WDR68	DDB1 and CUL4 associated factor 7	protein-coding
9_siCtrl_WDR5_peak_9829	chr2	86667619	86668938	+	2471	NA	promoter-TSS (NM_001146688)	promoter-TSS (NM_001146688)	-216	NM_018433	55818	Hs.557425	NM_018433	ENSG00000115548	KDM3A	JHDM2A|JHMD2A|JMJD1|JMJD1A|TSGA	lysine demethylase 3A	protein-coding
9_siCtrl_WDR5_peak_8761	chr19	37663113	37663841	+	2468	NA	promoter-TSS (NM_199126)	promoter-TSS (NM_199126)	120	NM_001288800	199704	Hs.659236	NM_152655	ENSG00000196967	ZNF585A	-	zinc finger protein 585A	protein-coding
9_siCtrl_WDR5_peak_5813	chr15	68569387	68571275	+	2461	NA	5' UTR (NM_015322, exon 1 of 2)	5' UTR (NM_015322, exon 1 of 2)	248	NM_015322	10116	Hs.362733	NM_015322	ENSG00000169018	FEM1B	F1A-ALPHA|F1AA|FEM1-beta	fem-1 homolog B	protein-coding
9_siCtrl_WDR5_peak_14034	chr5	151150415	151152017	+	2455	NA	promoter-TSS (NM_005754)	promoter-TSS (NM_005754)	-147	NR_132346	100652758	Hs.587054	NM_001278082		LOC100652758	-	uncharacterized LOC100652758	ncRNA
9_siCtrl_WDR5_peak_3853	chr12	54672985	54675596	+	2443	NA	promoter-TSS (NM_002136)	promoter-TSS (NM_002136)	-220	NR_135167	3178	Hs.546261	NM_002136	ENSG00000135486	HNRNPA1	ALS19|ALS20|HNRPA1|HNRPA1L3|IBMPFD3|UP 1|hnRNP A1|hnRNP-A1	heterogeneous nuclear ribonucleoprotein A1	protein-coding
9_siCtrl_WDR5_peak_14332	chr6	9398255	9399452	+	2442	NA	Intergenic	Intergenic	746411	NR_004855	728655	Hs.214343	NR_004855		HULC	HCCAT1|LINC00078|NCRNA00078	hepatocellular carcinoma up-regulated long non-coding RNA	ncRNA
9_siCtrl_WDR5_peak_7398	chr17	48784544	48785623	+	2424	NA	5' UTR (NM_052855, exon 1 of 5)	5' UTR (NM_052855, exon 1 of 5)	192	NM_052855	91369	Hs.463426	NM_052855	ENSG00000154945	ANKRD40	-	ankyrin repeat domain 40	protein-coding
9_siCtrl_WDR5_peak_10865	chr20	37075050	37076234	+	2422	NA	non-coding (NR_003239, exon 1 of 5)	non-coding (NR_003239, exon 1 of 5)	345	NR_003239	128439	Hs.16936	NM_139016	ENSG00000174365	SNHG11	C20orf198|LINC00101|NCRNA00101	small nucleolar RNA host gene 11	ncRNA
9_siCtrl_WDR5_peak_7352	chr17	46124652	46126412	+	2389	NA	promoter-TSS (NM_003204)	promoter-TSS (NM_003204)	-189	NM_001330262	4779	Hs.514284	NM_003204	ENSG00000082641	NFE2L1	LCR-F1|NRF1|TCF11	nuclear factor, erythroid 2 like 1	protein-coding
9_siCtrl_WDR5_peak_658	chr1	91965964	91967436	+	2385	NA	promoter-TSS (NM_001134420)	promoter-TSS (NM_001134420)	35	NM_001134420	8317	Hs.533573	NM_003503	ENSG00000097046	CDC7	CDC7L1|HsCDC7|Hsk1|huCDC7	cell division cycle 7	protein-coding
9_siCtrl_WDR5_peak_16220	chr7	134330718	134331944	+	2381	NA	promoter-TSS (NM_199186)	promoter-TSS (NM_199186)	-200	NM_199186	669	Hs.198365	NM_001724	ENSG00000172331	BPGM	DPGM|ECYT8	bisphosphoglycerate mutase	protein-coding
9_siCtrl_WDR5_peak_11694	chr3	14988531	14990573	+	2377	NA	promoter-TSS (NR_046252)	promoter-TSS (NR_046252)	-152	NR_046255	100505641	Hs.517821	NR_046251	ENSG00000225733	FGD5-AS1	-	FGD5 antisense RNA 1	ncRNA
9_siCtrl_WDR5_peak_4232	chr12	109914815	109915832	+	2374	NA	promoter-TSS (NM_001317399)	promoter-TSS (NM_001317399)	-105	NM_001270450	89910	Hs.374067	NM_130466	ENSG00000151148	UBE3B	BPIDS|KOS	ubiquitin protein ligase E3B	protein-coding
9_siCtrl_WDR5_peak_3004	chr11	63952486	63954245	+	2370	NA	promoter-TSS (NM_001282653)	promoter-TSS (NM_001282653)	-278	NM_006819	10963	Hs.337295	NM_006819	ENSG00000168439	STIP1	HEL-S-94n|HOP|IEF-SSP-3521|P60|STI1|STI1L	stress induced phosphoprotein 1	protein-coding
9_siCtrl_WDR5_peak_3836	chr12	53845555	53846819	+	2362	NA	intron (NM_001128911, intron 1 of 14)	CpG	301	NM_005016	5094	Hs.546271	NM_005016	ENSG00000197111	PCBP2	HNRNPE2|HNRPE2|hnRNP-E2	poly(rC) binding protein 2	protein-coding
9_siCtrl_WDR5_peak_2510	chr10	120428788	120429575	+	2361	NA	Intergenic	Intergenic	-74021	NM_004248	2834	Hs.248119	NM_004248	ENSG00000119973	PRLHR	GPR10|GR3|PrRPR	prolactin releasing hormone receptor	protein-coding
9_siCtrl_WDR5_peak_11310	chr22	19466272	19467834	+	2360	NA	promoter-TSS (NM_001178011)	promoter-TSS (NM_001178011)	64	NM_001369291	8318	Hs.474217	NM_003504	ENSG00000093009	CDC45	CDC45L|CDC45L2|MGORS7|PORC-PI-1	cell division cycle 45	protein-coding
9_siCtrl_WDR5_peak_11786	chr3	37034690	37035421	+	2348	NA	promoter-TSS (NM_014805)	promoter-TSS (NM_014805)	214	NM_001258274	4292	Hs.195364	NM_000249	ENSG00000076242	MLH1	COCA2|FCC2|HNPCC|HNPCC2|hMLH1	mutL homolog 1	protein-coding
9_siCtrl_WDR5_peak_15053	chr6	114291233	114293332	+	2343	NA	promoter-TSS (NR_033441)	promoter-TSS (NR_033441)	30	NM_001527	3066	Hs.3352	NM_001527	ENSG00000196591	HDAC2	HD2|KDAC2|RPD3|YAF1	histone deacetylase 2	protein-coding
9_siCtrl_WDR5_peak_13997	chr5	145826371	145827567	+	2338	NA	promoter-TSS (NM_006706)	promoter-TSS (NM_006706)	73	NM_006706	10915	Hs.443465	NM_006706	ENSG00000113649	TCERG1	CA150|TAF2S|Urn1	transcription elongation regulator 1	protein-coding
9_siCtrl_WDR5_peak_16030	chr7	100200518	100202446	+	2329	NA	non-coding (NR_038910, exon 1 of 9)	non-coding (NR_038910, exon 1 of 9)	179	NR_038910	100129845	Hs.714123	NR_038910	ENSG00000224729	PCOLCE-AS1	-	PCOLCE antisense RNA 1	ncRNA
9_siCtrl_WDR5_peak_16029	chr7	100183495	100184666	+	2322	NA	promoter-TSS (NM_002319)	promoter-TSS (NM_002319)	129	NM_033506	26261	Hs.283764	NM_012172	ENSG00000106336	FBXO24	FBX24	F-box protein 24	protein-coding
9_siCtrl_WDR5_peak_6875	chr17	4900827	4901281	+	2322	NA	promoter-TSS (NM_001167987)	promoter-TSS (NM_001167987)	-149	NM_001167985	388324	Hs.658926	NM_213726	ENSG00000196388	INCA1	HSD45	inhibitor of CDK, cyclin A1 interacting protein 1	protein-coding
9_siCtrl_WDR5_peak_17626	chr9	109623140	109625602	+	2319	NA	Intergenic	Intergenic	-1076	NM_001347997	58499	Hs.370379	NM_021224	ENSG00000148143	ZNF462	ZFPIP|Zfp462	zinc finger protein 462	protein-coding
9_siCtrl_WDR5_peak_11273	chr21	47604183	47605028	+	2310	NA	promoter-TSS (NM_032261)	promoter-TSS (NM_032261)	-232	NM_001142854	84221	Hs.381214	NM_032261	ENSG00000160284	SPATC1L	C21orf56	spermatogenesis and centriole associated 1 like	protein-coding
9_siCtrl_WDR5_peak_1287	chr1	183440936	183442193	+	2282	NA	promoter-TSS (NM_173156)	promoter-TSS (NM_173156)	-70	NM_173156	9887	Hs.591463	NM_014837	ENSG00000116698	SMG7	C1orf16|EST1C|SGA56M	SMG7 nonsense mediated mRNA decay factor	protein-coding
9_siCtrl_WDR5_peak_10484	chr2	220461639	220463124	+	2280	NA	promoter-TSS (NM_052902)	promoter-TSS (NM_052902)	-198	NM_052902	114790	Hs.22410	NM_052902	ENSG00000144589	STK11IP	LIP1|LKB1IP|STK11IP1	serine/threonine kinase 11 interacting protein	protein-coding
9_siCtrl_WDR5_peak_8362	chr19	4471231	4472534	+	2277	NA	promoter-TSS (NM_032631)	promoter-TSS (NM_032631)	-412	NM_001001520	84717	Hs.43071	NM_032631	ENSG00000167674	HDGFL2	HDGF-2|HDGF2|HDGFRP2|HRP-2|HRP2	HDGF like 2	protein-coding
9_siCtrl_WDR5_peak_15128	chr6	127836360	127838075	+	2274	NA	exon (NM_001012279, exon 2 of 12)	exon (NM_001012279, exon 2 of 12)	2952	NM_001012279	387104	Hs.319247	NM_001012279	ENSG00000255330	SOGA3	C6orf174|dJ403A15.3	SOGA family member 3	protein-coding
9_siCtrl_WDR5_peak_7520	chr17	57696101	57698275	+	2271	NA	promoter-TSS (NM_004859)	promoter-TSS (NM_004859)	-68	NM_004859	1213	Hs.491351	NM_004859	ENSG00000141367	CLTC	CHC|CHC17|CLH-17|CLTCL2|Hc|MRD56	clathrin heavy chain	protein-coding
9_siCtrl_WDR5_peak_10853	chr20	35723668	35724961	+	2260	NA	promoter-TSS (NM_002895)	promoter-TSS (NM_002895)	86	NM_183404	5933	Hs.207745	NM_002895	ENSG00000080839	RBL1	CP107|PRB1|p107	RB transcriptional corepressor like 1	protein-coding
9_siCtrl_WDR5_peak_4957	chr14	23938153	23939496	+	2257	NA	promoter-TSS (NM_015514)	promoter-TSS (NM_015514)	-88	NM_001042635	25983	Hs.9043	NM_015514	ENSG00000129460	NGDN	C14orf120|CANu1|LCP5|NGD|lpd-2	neuroguidin	protein-coding
9_siCtrl_WDR5_peak_14695	chr6	42515270	42516250	+	2255	NA	Intergenic	Intergenic	-16000	NM_015255	23304	Hs.529925	NM_015255	ENSG00000024048	UBR2	C6orf133|bA49A4.1|dJ242G1.1|dJ392M17.3	ubiquitin protein ligase E3 component n-recognin 2	protein-coding
9_siCtrl_WDR5_peak_8793	chr19	39390129	39390939	+	2252	NA	promoter-TSS (NR_040515)	promoter-TSS (NR_040515)	-32	NM_001193286	22933	Hs.466693	NM_012237	ENSG00000068903	SIRT2	SIR2|SIR2L|SIR2L2	sirtuin 2	protein-coding
9_siCtrl_WDR5_peak_5197	chr14	74607034	74607651	+	2247	NA	intron (NM_001024674, intron 5 of 5)	intron (NM_001024674, intron 5 of 5)	55686	NM_001024674	91750	Hs.612866	NM_001024674	ENSG00000205659	LIN52	C14orf46|c14_5549	lin-52 DREAM MuvB core complex component	protein-coding
9_siCtrl_WDR5_peak_1419	chr1	205600117	205601662	+	2236	NA	5' UTR (NM_001973, exon 1 of 5)	5' UTR (NM_001973, exon 1 of 5)	1111	NM_021795	2005	Hs.497520	NM_001973	ENSG00000158711	ELK4	SAP1	ETS transcription factor ELK4	protein-coding
9_siCtrl_WDR5_peak_3908	chr12	57482712	57483759	+	2225	NA	intron (NM_005967, intron 1 of 6)	intron (NM_005967, intron 1 of 6)	338	NM_005967	4665	Hs.159223	NM_005967	ENSG00000166886	NAB2	MADER	NGFI-A binding protein 2	protein-coding
9_siCtrl_WDR5_peak_8725	chr19	36119337	36120409	+	2222	NA	promoter-TSS (NM_001319113)	promoter-TSS (NM_001319113)	-45	NM_001319113	79171	Hs.5086	NM_024321	ENSG00000126254	RBM42	-	RNA binding motif protein 42	protein-coding
9_siCtrl_WDR5_peak_12567	chr3	195162470	195164138	+	2219	NA	intron (NM_012287, intron 1 of 22)	CpG	445	NM_012287	23527	Hs.593373	NM_012287	ENSG00000114331	ACAP2	CENTB2|CNT-B2	ArfGAP with coiled-coil, ankyrin repeat and PH domains 2	protein-coding
9_siCtrl_WDR5_peak_7760	chr17	74667450	74668563	+	2212	NA	promoter-TSS (NR_130916)	promoter-TSS (NR_130916)	-4	NR_130916	105274304	Hs.572495	NR_130916	ENSG00000261335	LOC105274304	-	uncharacterized LOC105274304	ncRNA
9_siCtrl_WDR5_peak_14162	chr5	171432987	171434048	+	2211	NA	5' UTR (NM_033645, exon 1 of 12)	5' UTR (NM_033645, exon 1 of 12)	360	NM_012300	23291	Hs.484138	NM_012300	ENSG00000072803	FBXW11	BTRC2|BTRCP2|FBW1B|FBXW1B|Fbw11|Hos	F-box and WD repeat domain containing 11	protein-coding
9_siCtrl_WDR5_peak_8235	chr18	72264211	72265864	+	2204	NA	promoter-TSS (NR_024484)	promoter-TSS (NR_024484)	34	NR_024484	400657	Hs.61508	NM_001008234	ENSG00000264247	LINC00909	-	long intergenic non-protein coding RNA 909	ncRNA
9_siCtrl_WDR5_peak_9841	chr2	88926061	88927810	+	2200	NA	promoter-TSS (NR_135540)	promoter-TSS (NR_135540)	47	NM_004836	9451	Hs.591589	NM_004836	ENSG00000172071	EIF2AK3	PEK|PERK|WRS	eukaryotic translation initiation factor 2 alpha kinase 3	protein-coding
9_siCtrl_WDR5_peak_788	chr1	110713639	110714510	+	2199	NA	intron (NM_001010898, intron 2 of 11)	intron (NM_001010898, intron 2 of 11)	20958	NM_001010898	388662	Hs.128382	NM_001010898	ENSG00000197106	SLC6A17	MRT48|NTT4	solute carrier family 6 member 17	protein-coding
9_siCtrl_WDR5_peak_13189	chr4	152681609	152682530	+	2191	NA	promoter-TSS (NM_004564)	promoter-TSS (NM_004564)	90	NM_004564	5188	Hs.119316	NM_004564	ENSG00000059691	GATB	HSPC199|PET112|PET112L	glutamyl-tRNA amidotransferase subunit B	protein-coding
9_siCtrl_WDR5_peak_957	chr1	150601319	150602608	+	2177	NA	promoter-TSS (NM_207047)	promoter-TSS (NM_207047)	125	NM_207042	2029	Hs.632456	NM_004436	ENSG00000143420	ENSA	ARPP-19e	endosulfine alpha	protein-coding
9_siCtrl_WDR5_peak_15207	chr6	143605091	143605609	+	2164	NA	exon (NM_001363721, exon 4 of 6)	exon (NM_001363721, exon 4 of 6)	119431	NM_001366361	51390	Hs.567501	NM_016108	ENSG00000146416	AIG1	AIG-1|dJ95L4.1	androgen induced 1	protein-coding
9_siCtrl_WDR5_peak_15141	chr6	131383160	131385057	+	2164	NA	intron (NM_001350307, intron 1 of 18)	CpG	277	NM_001431	2037	Hs.486470	NM_001431	ENSG00000079819	EPB41L2	4.1-G|4.1G	erythrocyte membrane protein band 4.1 like 2	protein-coding
9_siCtrl_WDR5_peak_15768	chr7	63385715	63387090	+	2160	NA	Intergenic	Intergenic	-72782	NR_145488	100419780	Hs.742917	NR_145488		ZNF722P	ZNF722	zinc finger protein 722, pseudogene	pseudo
9_siCtrl_WDR5_peak_8284	chr19	1248230	1249619	+	2156	NA	intron (NM_177401, intron 1 of 7)	CpG	372	NM_177401	90007	Hs.465529	NM_177401	ENSG00000167470	MIDN	-	midnolin	protein-coding
9_siCtrl_WDR5_peak_4906	chr13	113950858	113952050	+	2152	NA	promoter-TSS (NM_005561)	promoter-TSS (NM_005561)	-100	NM_005561	3916	Hs.494419	NM_005561	ENSG00000185896	LAMP1	CD107a|LAMPA|LGP120	lysosomal associated membrane protein 1	protein-coding
9_siCtrl_WDR5_peak_15255	chr6	151561403	151562826	+	2151	NA	intron (NM_005100, intron 2 of 4)	CpG-22646	1012	NM_005100	9590	Hs.371240	NM_005100	ENSG00000131016	AKAP12	AKAP250|SSeCKS	A-kinase anchoring protein 12	protein-coding
9_siCtrl_WDR5_peak_10980	chr20	48531647	48532615	+	2149	NA	promoter-TSS (NR_134564)	promoter-TSS (NR_134564)	-65	NM_006038	9825	Hs.48513	NM_006038	ENSG00000158480	SPATA2	PD1|PPP1R145|tamo	spermatogenesis associated 2	protein-coding
9_siCtrl_WDR5_peak_11460	chr22	38004018	38005210	+	2145	NA	promoter-TSS (NM_001172688)	promoter-TSS (NM_001172688)	133	NM_001172687	26088	Hs.499158	NM_013365	ENSG00000100083	GGA1	-	golgi associated, gamma adaptin ear containing, ARF binding protein 1	protein-coding
9_siCtrl_WDR5_peak_7508	chr17	56594857	56596864	+	2142	NA	promoter-TSS (NM_004687)	promoter-TSS (NM_004687)	-619	NM_004687	9110	Hs.514373	NM_004687	ENSG00000108389	MTMR4	FYVE-DSP2|ZFYVE11	myotubularin related protein 4	protein-coding
9_siCtrl_WDR5_peak_12751	chr4	39367319	39368371	+	2131	NA	intron (NM_001363495, intron 1 of 23)	CpG	137	NM_001204747	5981	Hs.507475	NM_002913	ENSG00000035928	RFC1	A1|CANVAS|MHCBFB|PO-GA|RECC1|RFC|RFC140	replication factor C subunit 1	protein-coding
9_siCtrl_WDR5_peak_14175	chr5	173043073	173044080	+	2127	NA	promoter-TSS (NM_138369)	promoter-TSS (NM_138369)	77	NM_138369	91272	Hs.425091	NM_138369	ENSG00000145919	BOD1	FAM44B	biorientation of chromosomes in cell division 1	protein-coding
9_siCtrl_WDR5_peak_11690	chr3	14257867	14258774	+	2117	NA	Intergenic	MER117|DNA|hAT-Charlie	38003	NM_014463	27258	Hs.111632	NM_014463	ENSG00000170860	LSM3	SMX4|USS2|YLR438C	LSM3 homolog, U6 small nuclear RNA and mRNA degradation associated	protein-coding
9_siCtrl_WDR5_peak_5650	chr15	50646294	50648081	+	2098	NA	promoter-TSS (NR_026891)	promoter-TSS (NR_026891)	-111	NR_026891	55056	Hs.511316	NM_017976	ENSG00000285410	GABPB1-IT1	-	GABPB1 intronic transcript	ncRNA
9_siCtrl_WDR5_peak_7489	chr17	55888176	55889372	+	2098	NA	Intergenic	Intergenic	38631	NM_016070	51649	Hs.5836	NM_016070	ENSG00000181610	MRPS23	CGI-138|HSPC329|MRP-S23	mitochondrial ribosomal protein S23	protein-coding
9_siCtrl_WDR5_peak_953	chr1	150459312	150460457	+	2095	NA	promoter-TSS (NR_073513)	promoter-TSS (NR_073513)	-11	NM_025150	80222	Hs.288974	NM_025150	ENSG00000143374	TARS2	COXPD21|TARSL1|thrRS	threonyl-tRNA synthetase 2, mitochondrial	protein-coding
9_siCtrl_WDR5_peak_10526	chr2	232571415	232573152	+	2094	NA	promoter-TSS (NM_002823)	promoter-TSS (NM_002823)	-952	NM_001099285	5757	Hs.459927	NM_002823	ENSG00000187514	PTMA	TMSA	prothymosin alpha	protein-coding
9_siCtrl_WDR5_peak_12497	chr3	184428516	184429953	+	2091	NA	promoter-TSS (NR_160768)	promoter-TSS (NR_160768)	618	NM_022149	64110	Hs.306123	NM_022149	ENSG00000177383	MAGEF1	MAGE-F1	MAGE family member F1	protein-coding
9_siCtrl_WDR5_peak_10342	chr2	201936011	201936998	+	2078	NA	promoter-TSS (NM_001321621)	promoter-TSS (NM_001321621)	-110	NM_001321628	285172	Hs.24701	NM_173822	ENSG00000155744	FAM126B	HYCC2	family with sequence similarity 126 member B	protein-coding
9_siCtrl_WDR5_peak_4484	chr12	133405076	133405908	+	2072	NA	promoter-TSS (NM_001172557)	promoter-TSS (NM_001172557)	-37	NM_001172557	2802	Hs.507333	NM_005895	ENSG00000090615	GOLGA3	GCP170|MEA-2	golgin A3	protein-coding
9_siCtrl_WDR5_peak_813	chr1	113498919	113500215	+	2057	NA	promoter-TSS (NM_003051)	promoter-TSS (NM_003051)	530	NR_103744	100506392	Hs.418285	NR_103743	ENSG00000226419	SLC16A1-AS1	-	SLC16A1 antisense RNA 1	ncRNA
9_siCtrl_WDR5_peak_3878	chr12	56435368	56436480	+	2055	NA	5' UTR (NM_001029, exon 1 of 4)	5' UTR (NM_001029, exon 1 of 4)	222	NM_001029	6231	Hs.447562	NM_001029	ENSG00000197728	RPS26	DBA10|S26|eS26	ribosomal protein S26	protein-coding
9_siCtrl_WDR5_peak_9756	chr2	74775295	74776845	+	2044	NA	promoter-TSS (NM_001197260)	promoter-TSS (NM_001197260)	-77	NM_001197260	1796	Hs.103854	NM_001381	ENSG00000115325	DOK1	P62DOK|pp62	docking protein 1	protein-coding
9_siCtrl_WDR5_peak_7256	chr17	41983589	41985712	+	2038	NA	5' UTR (NM_001278381, exon 1 of 14)	5' UTR (NM_001278381, exon 1 of 14)	254	NM_001278374	4355	Hs.514208	NM_005374	ENSG00000108852	MPP2	DLG2	membrane palmitoylated protein 2	protein-coding
9_siCtrl_WDR5_peak_6930	chr17	8094737	8095738	+	2031	NA	Intergenic	Intergenic	-1739	NM_017622	54785	Hs.129563	NM_017622	ENSG00000196544	BORCS6	C17orf59|PRO2472	BLOC-1 related complex subunit 6	protein-coding
9_siCtrl_WDR5_peak_7500	chr17	56083531	56085842	+	2027	NA	promoter-TSS (NR_034041)	promoter-TSS (NR_034041)	21	NR_034041	6426	Hs.68714	NM_006924	ENSG00000136450	SRSF1	ASF|SF2|SF2p33|SFRS1|SRp30a	serine and arginine rich splicing factor 1	protein-coding
9_siCtrl_WDR5_peak_1860	chr10	5931334	5932705	+	2025	NA	promoter-TSS (NM_001009941)	promoter-TSS (NM_001009941)	-147	NM_001258453	84893	Hs.498543	NM_032807	ENSG00000134452	FBH1	FBXO18|Fbx18|hFBH1	F-box DNA helicase 1	protein-coding
9_siCtrl_WDR5_peak_7373	chr17	47784704	47785913	+	2015	NA	promoter-TSS (NM_005827)	promoter-TSS (NM_005827)	18	NM_005827	10237	Hs.154073	NM_005827	ENSG00000121073	SLC35B1	UGTREL1	solute carrier family 35 member B1	protein-coding
9_siCtrl_WDR5_peak_7735	chr17	73662907	73663934	+	2012	NA	promoter-TSS (NM_004259)	promoter-TSS (NM_004259)	2	NM_013260	29115	Hs.655088	NM_013260	ENSG00000161526	SAP30BP	HCNGP|HTRG|HTRP	SAP30 binding protein	protein-coding
9_siCtrl_WDR5_peak_7681	chr17	71582253	71583150	+	2007	NA	intron (NM_001144952, intron 1 of 44)	intron (NM_001144952, intron 1 of 44)	57883	NM_001144952	54549	Hs.435719	NM_019064	ENSG00000069188	SDK2	-	sidekick cell adhesion molecule 2	protein-coding
9_siCtrl_WDR5_peak_5200	chr14	74724332	74725078	+	2007	NA	intron (NM_182894, intron 3 of 4)	CpG	18553	NM_182894	338917	Hs.449771	NM_182894	ENSG00000119614	VSX2	CHX10|HOX10|MCOP2|MCOPCB3|RET1	visual system homeobox 2	protein-coding
9_siCtrl_WDR5_peak_7534	chr17	58754283	58755461	+	2005	NA	promoter-TSS (NM_001099432)	promoter-TSS (NM_001099432)	-340	NM_001353145	54828	Hs.655028	NM_017679	ENSG00000141376	BCAS3	GAOB1|MAAB	BCAS3 microtubule associated cell migration factor	protein-coding
9_siCtrl_WDR5_peak_8717	chr19	35167541	35168948	+	2001	NA	promoter-TSS (NM_018443)	promoter-TSS (NM_018443)	-300	NR_110322	55900	Hs.436350	NM_018443	ENSG00000089335	ZNF302	HSD16|MST154|MSTP154|ZNF135L|ZNF140L|ZNF327	zinc finger protein 302	protein-coding
9_siCtrl_WDR5_peak_356	chr1	52343919	52345381	+	1999	NA	promoter-TSS (NM_001242361)	promoter-TSS (NM_001242361)	-41	NM_001101662	4898	Hs.584782	NM_002525	ENSG00000078618	NRDC	NRD1|hNRD1|hNRD2	nardilysin convertase	protein-coding
9_siCtrl_WDR5_peak_8987	chr19	50269511	50270577	+	1995	NA	promoter-TSS (NM_014203)	promoter-TSS (NM_014203)	-214	NM_130787	160	Hs.467125	NM_014203	ENSG00000196961	AP2A1	ADTAA|AP2-ALPHA|CLAPA1	adaptor related protein complex 2 subunit alpha 1	protein-coding
9_siCtrl_WDR5_peak_4389	chr12	123716420	123717811	+	1994	NA	promoter-TSS (NM_152269)	promoter-TSS (NM_152269)	573	NR_103517	10198	Hs.577404	NM_022782	ENSG00000051825	MPHOSPH9	MPP-9|MPP9	M-phase phosphoprotein 9	protein-coding
9_siCtrl_WDR5_peak_1738	chr1	235490307	235492825	+	1991	NA	promoter-TSS (NR_036605)	promoter-TSS (NR_036605)	-72	NM_016374	51742	Hs.575782	NM_016374	ENSG00000054267	ARID4B	BCAA|BRCAA1|RBBP1L1|RBP1L1|SAP180	AT-rich interaction domain 4B	protein-coding
9_siCtrl_WDR5_peak_7420	chr17	52863076	52863632	+	1984	NA	Intergenic	Intergenic	-114698	NM_001321175	10040	Hs.153504	NM_005486	ENSG00000141198	TOM1L1	SRCASM	target of myb1 like 1 membrane trafficking protein	protein-coding
9_siCtrl_WDR5_peak_9379	chr2	27885989	27887175	+	1983	NA	promoter-TSS (NM_014860)	promoter-TSS (NM_014860)	-101	NM_014860	9913	Hs.6232	NM_014860	ENSG00000119760	SUPT7L	SPT7L|STAF65|STAF65(gamma)|STAF65G|SUPT7H	SPT7 like, STAGA complex gamma subunit	protein-coding
9_siCtrl_WDR5_peak_506	chr1	63249299	63250298	+	1981	NA	promoter-TSS (NM_032852)	promoter-TSS (NM_032852)	-5	NM_032852	84938	Hs.7353	NM_032852	ENSG00000125703	ATG4C	APG4-C|APG4C|AUTL1|AUTL3	autophagy related 4C cysteine peptidase	protein-coding
9_siCtrl_WDR5_peak_1368	chr1	201798086	201798968	+	1980	NA	non-coding (NR_046696, exon 1 of 3)	non-coding (NR_046696, exon 1 of 3)	160	NR_046696	100873949	Hs.604842	NR_046696	ENSG00000231871	IPO9-AS1	-	IPO9 antisense RNA 1	ncRNA
9_siCtrl_WDR5_peak_3770	chr12	49245545	49246600	+	1979	NA	promoter-TSS (NM_004818)	promoter-TSS (NM_004818)	-126	NM_004818	9416	Hs.130098	NM_004818	ENSG00000174243	DDX23	PRPF28|SNRNP100|U5-100K|U5-100KD|prp28	DEAD-box helicase 23	protein-coding
9_siCtrl_WDR5_peak_3761	chr12	48499201	48500370	+	1964	NA	promoter-TSS (NM_001354737)	promoter-TSS (NM_001354737)	-10	NR_051991	29843	Hs.371957	NM_014554	ENSG00000079387	SENP1	SuPr-2	SUMO specific peptidase 1	protein-coding
9_siCtrl_WDR5_peak_8847	chr19	42748560	42749178	+	1964	NA	Intergenic	Intergenic	-2115	NM_019884	2931	Hs.466828	NM_019884	ENSG00000105723	GSK3A	-	glycogen synthase kinase 3 alpha	protein-coding
9_siCtrl_WDR5_peak_4956	chr14	23789763	23791616	+	1954	NA	promoter-TSS (NM_001360552)	promoter-TSS (NM_001360552)	23	NM_001360551	8106	Hs.707712	NM_004643	ENSG00000100836	PABPN1	OPMD|PAB2|PABII|PABP-2|PABP2	poly(A) binding protein nuclear 1	protein-coding
9_siCtrl_WDR5_peak_1019	chr1	154946309	154948452	+	1948	NA	promoter-TSS (NR_036212)	promoter-TSS (NR_036212)	223	NM_001826	1163	Hs.374378	NM_001826	ENSG00000173207	CKS1B	CKS1|PNAS-16|PNAS-18|ckshs1	CDC28 protein kinase regulatory subunit 1B	protein-coding
9_siCtrl_WDR5_peak_7738	chr17	73780266	73781836	+	1948	NA	promoter-TSS (NR_039892)	promoter-TSS (NR_039892)	131	NR_038131	85451	Hs.584768	NM_001080419	ENSG00000132478	UNK	UNKEMPT|ZC3H5|ZC3HDC5	unk zinc finger	protein-coding
9_siCtrl_WDR5_peak_7519	chr17	57642362	57643516	+	1940	NA	promoter-TSS (NM_001166301)	promoter-TSS (NM_001166301)	-32	NM_001166301	79665	Hs.29403	NM_024612	ENSG00000108406	DHX40	ARG147|DDX40|PAD	DEAH-box helicase 40	protein-coding
9_siCtrl_WDR5_peak_8624	chr19	19496017	19496814	+	1934	NA	promoter-TSS (NM_001300946)	promoter-TSS (NM_001300946)	-197	NM_017660	54815	Hs.118964	NM_017660	ENSG00000167491	GATAD2A	p66alpha	GATA zinc finger domain containing 2A	protein-coding
9_siCtrl_WDR5_peak_7347	chr17	46080303	46081604	+	1933	NA	Intergenic	Intergenic	-29295	NR_162100	113218499		NR_162100		MIR10226	-	microRNA 10226	ncRNA
9_siCtrl_WDR5_peak_8419	chr19	8454626	8455612	+	1932	NA	promoter-TSS (NR_049795)	promoter-TSS (NR_049795)	-125	NM_004218	9230	Hs.558403	NM_004218	ENSG00000185236	RAB11B	H-YPT3|NDAGSCW	RAB11B, member RAS oncogene family	protein-coding
9_siCtrl_WDR5_peak_7719	chr17	73042547	73043537	+	1928	NA	promoter-TSS (NM_001003785)	promoter-TSS (NM_001003785)	22	NM_001003785	10476	Hs.514465	NM_006356	ENSG00000167863	ATP5PD	APT5H|ATP5H|ATPQ	ATP synthase peripheral stalk subunit d	protein-coding
9_siCtrl_WDR5_peak_14155	chr5	170628180	170628728	+	1921	NA	intron (NM_022897, intron 19 of 27)	intron (NM_022897, intron 19 of 27)	-107798	NM_021025	30012	Hs.249125	NM_021025	ENSG00000164438	TLX3	HOX11L2|RNX	T cell leukemia homeobox 3	protein-coding
9_siCtrl_WDR5_peak_11747	chr3	28617046	28618292	+	1918	NA	intron (NR_038840, intron 1 of 4)	CpG	900	NR_038840	645206	Hs.376725	NR_038840		LINC00693	-	long intergenic non-protein coding RNA 693	ncRNA
9_siCtrl_WDR5_peak_3842	chr12	54120982	54121798	+	1910	NA	promoter-TSS (NM_020898)	promoter-TSS (NM_020898)	-154	NM_001143682	57658	Hs.156667	NM_020898	ENSG00000012822	CALCOCO1	Cocoa|PP13275|calphoglin	calcium binding and coiled-coil domain 1	protein-coding
9_siCtrl_WDR5_peak_14077	chr5	159545447	159547175	+	1910	NA	exon (NM_001267035, exon 1 of 3)	exon (NM_001267035, exon 1 of 3)	146	NR_146216	114825	Hs.744960	NM_052927	ENSG00000170234	PWWP2A	MST101	PWWP domain containing 2A	protein-coding
9_siCtrl_WDR5_peak_10556	chr2	237629647	237630157	+	1907	NA	Intergenic	Intergenic	151434	NM_020311	57007	Hs.471751	NM_020311	ENSG00000144476	ACKR3	CMKOR1|CXC-R7|CXCR-7|CXCR7|GPR159|RDC-1|RDC1	atypical chemokine receptor 3	protein-coding
9_siCtrl_WDR5_peak_15715	chr7	44529768	44530744	+	1905	NA	promoter-TSS (NM_015332)	promoter-TSS (NM_015332)	1	NM_015332	23386	Hs.488171	NM_015332	ENSG00000015676	NUDCD3	NudCL	NudC domain containing 3	protein-coding
9_siCtrl_WDR5_peak_14585	chr6	32144396	32146559	+	1894	NA	promoter-TSS (NM_006913).5	promoter-TSS (NM_006913).5	-354	NM_001371438
9_siCtrl_WDR5_peak_4415	chr12	125139492	125141477	+	1891	NA	Intergenic	Intergenic	-88326	NM_001077261	9612	Hs.137510	NM_006312	ENSG00000196498	NCOR2	CTG26|N-CoR2|SMAP270|SMRT|SMRTE|SMRTE-tau|TNRC14|TRAC|TRAC-1|TRAC1	nuclear receptor corepressor 2	protein-coding
9_siCtrl_WDR5_peak_3898	chr12	57039204	57040296	+	1888	NA	promoter-TSS (NR_002737)	promoter-TSS (NR_002737)	18	NM_001686	506	Hs.406510	NM_001686	ENSG00000110955	ATP5F1B	ATP5B|ATPMB|ATPSB|HEL-S-271	ATP synthase F1 subunit beta	protein-coding
9_siCtrl_WDR5_peak_1770	chr1	241610158	241611243	+	1888	NA	Intergenic	Intergenic	72385	NM_000143	2271	Hs.592490	NM_000143	ENSG00000091483	FH	FMRD|HLRCC|HsFH|LRCC|MCL|MCUL1	fumarate hydratase	protein-coding
9_siCtrl_WDR5_peak_8513	chr19	13001308	13002455	+	1885	NA	promoter-TSS (NM_000159)	promoter-TSS (NM_000159)	-62	NR_102317	2639	Hs.532699	NM_000159	ENSG00000105607	GCDH	ACAD5|GCD	glutaryl-CoA dehydrogenase	protein-coding
9_siCtrl_WDR5_peak_8583	chr19	17447571	17448638	+	1879	NA	promoter-TSS (NM_032620)	promoter-TSS (NM_032620)	-258	NM_001128855	84705	Hs.334885	NM_032620	ENSG00000130299	GTPBP3	COXPD23|GTPBG3|MSS1|MTGP1|THDF1	GTP binding protein 3, mitochondrial	protein-coding
9_siCtrl_WDR5_peak_14590	chr6	33167684	33169128	+	1878	NA	promoter-TSS (NM_001077516).2	promoter-TSS (NM_001077516).2	36	NM_001270401	6257	Hs.388034	NM_021976	ENSG00000204231	RXRB	DAUDI6|H-2RIIBP|NR2B2|RCoR-1	retinoid X receptor beta	protein-coding
9_siCtrl_WDR5_peak_5872	chr15	72667864	72668939	+	1877	NA	promoter-TSS (NR_027262)	promoter-TSS (NR_027262)	-46	NM_000520	3073	Hs.604479	NM_000520	ENSG00000213614	HEXA	TSD	hexosaminidase subunit alpha	protein-coding
9_siCtrl_WDR5_peak_8593	chr19	18043326	18044060	+	1875	NA	promoter-TSS (NM_001136203)	promoter-TSS (NM_001136203)	-131	NM_001136203	115098	Hs.100043	NM_138442	ENSG00000007080	CCDC124	-	coiled-coil domain containing 124	protein-coding
9_siCtrl_WDR5_peak_10351	chr2	202685204	202686004	+	1873	NA	intron (NM_139158, intron 4 of 13)	intron (NM_139158, intron 4 of 13)	14302	NM_001261435	65061	Hs.348711	NM_139158	ENSG00000138395	CDK15	ALS2CR7|PFTAIRE2|PFTK2	cyclin dependent kinase 15	protein-coding
9_siCtrl_WDR5_peak_15375	chr6	170190257	170191075	+	1873	NA	non-coding (NR_026781, exon 2 of 2)	non-coding (NR_026781, exon 2 of 2)	497	NR_026780	80069	Hs.677182	NM_025002	ENSG00000231690	LINC00574	C6orf208|CRALA|dJ182D15.1	long intergenic non-protein coding RNA 574	ncRNA
9_siCtrl_WDR5_peak_13962	chr5	140079606	140080664	+	1871	NA	intron (NM_144723, intron 1 of 5)	intron (NM_144723, intron 1 of 5)	103	NM_144723	153527	Hs.350194	NM_144723	ENSG00000146007	ZMAT2	Ptg-12|Snu23	zinc finger matrin-type 2	protein-coding
9_siCtrl_WDR5_peak_11441	chr22	35695705	35696757	+	1868	NA	intron (NM_001135732, intron 1 of 14)	intron (NM_001135732, intron 1 of 14)	344	NM_005488	10043	Hs.474705	NM_005488	ENSG00000100284	TOM1	-	target of myb1 membrane trafficking protein	protein-coding
9_siCtrl_WDR5_peak_4972	chr14	24701072	24702324	+	1862	NA	promoter-TSS (NR_104265)	promoter-TSS (NR_104265)	-107	NM_001199823	100528064	Hs.220963	NM_001199823	ENSG00000255526	NEDD8-MDP1	-	NEDD8-MDP1 readthrough	protein-coding
9_siCtrl_WDR5_peak_4167	chr12	104322957	104324538	+	1862	NA	promoter-TSS (NR_037425)	promoter-TSS (NR_037425)	242	NR_027249	253724	Hs.506549	NR_027249	ENSG00000214198	TTC41P	GNN|GNNP	tetratricopeptide repeat domain 41, pseudogene	pseudo
9_siCtrl_WDR5_peak_7625	chr17	66031528	66032479	+	1860	NA	promoter-TSS (NM_001320611)	promoter-TSS (NM_001320611)	-73	NM_001320611	3838	Hs.594238	NM_002266	ENSG00000182481	KPNA2	IPOA1|QIP2|RCH1|SRP1-alpha|SRP1alpha	karyopherin subunit alpha 2	protein-coding
9_siCtrl_WDR5_peak_15499	chr7	13506483	13507176	+	1855	NA	Intergenic	Intergenic	519310	NM_001163152	2115	Hs.22634	NM_004956	ENSG00000006468	ETV1	ER81	ETS variant 1	protein-coding
9_siCtrl_WDR5_peak_9504	chr2	44394587	44396773	+	1853	NA	promoter-TSS (NM_177969)	promoter-TSS (NM_177969)	-262	NM_177969	5495	Hs.416769	NM_002706	ENSG00000138032	PPM1B	PP2C-beta|PP2C-beta-X|PP2CB|PP2CBETA|PPC2BETAX	protein phosphatase, Mg2+/Mn2+ dependent 1B	protein-coding
9_siCtrl_WDR5_peak_3647	chr12	27166540	27167556	+	1851	NA	exon (NM_016551, exon 1 of 12)	exon (NM_016551, exon 1 of 12)	269	NM_016551	51768	Hs.438641	NM_016551	ENSG00000064115	TM7SF3	-	transmembrane 7 superfamily member 3	protein-coding
9_siCtrl_WDR5_peak_3116	chr11	71822873	71824112	+	1849	NA	promoter-TSS (NM_001278494)	promoter-TSS (NM_001278494)	-148	NM_001278491	25906	Hs.38044	NM_014042	ENSG00000110200	ANAPC15	APC15|C11orf51|HSPC020	anaphase promoting complex subunit 15	protein-coding
9_siCtrl_WDR5_peak_14596	chr6	33256554	33257781	+	1843	NA	promoter-TSS (NM_001164267).4	promoter-TSS (NM_001164267).4	-151	NM_001164267	9277	Hs.520063	NM_005452	ENSG00000227057	WDR46	BING4|C6orf11|FP221|UTP7	WD repeat domain 46	protein-coding
9_siCtrl_WDR5_peak_7378	chr17	47865336	47866983	+	1841	NA	5' UTR (NM_007067, exon 1 of 15)	5' UTR (NM_007067, exon 1 of 15)	116	NM_001199157	11143	Hs.21907	NM_007067	ENSG00000136504	KAT7	HBO1|HBOA|MYST2|ZC2HC7	lysine acetyltransferase 7	protein-coding
9_siCtrl_WDR5_peak_8923	chr19	47353660	47354577	+	1831	NA	promoter-TSS (NM_004069)	promoter-TSS (NM_004069)	-15	NM_004069	1175	Hs.119591	NM_004069	ENSG00000042753	AP2S1	AP17|CLAPS2|FBH3|FBHOk|HHC3	adaptor related protein complex 2 subunit sigma 1	protein-coding
9_siCtrl_WDR5_peak_7559	chr17	60555160	60557212	+	1829	NA	promoter-TSS (NM_001330418)	promoter-TSS (NM_001330418)	-293	NM_001330418	11011	Hs.445078	NM_006852	ENSG00000146872	TLK2	HsHPK|MRD57|PKU-ALPHA	tousled like kinase 2	protein-coding
9_siCtrl_WDR5_peak_12153	chr3	113414822	113416381	+	1829	NA	promoter-TSS (NR_111981)	promoter-TSS (NR_111981)	-108	NR_111981	205717	Hs.632570	NM_001009899	ENSG00000176542	USF3	KIAA2018	upstream transcription factor family member 3	protein-coding
9_siCtrl_WDR5_peak_461	chr1	60524891	60525683	+	1828	NA	intron (NM_152377, intron 2 of 11)	intron (NM_152377, intron 2 of 11)	14155	NM_152377	127795	Hs.47385	NM_152377	ENSG00000162598	C1orf87	CREF	chromosome 1 open reading frame 87	protein-coding
9_siCtrl_WDR5_peak_15720	chr7	44887186	44888688	+	1828	NA	promoter-TSS (NM_201436)	promoter-TSS (NM_201436)	-212	NM_201516	94239	Hs.488189	NM_012412	ENSG00000105968	H2AFV	H2A.Z-2|H2AV	H2A histone family member V	protein-coding
9_siCtrl_WDR5_peak_984	chr1	151762591	151763932	+	1827	NA	promoter-TSS (NM_001083964)	promoter-TSS (NM_001083964)	36	NR_146293	109729141	Hs.439525	NR_146292	ENSG00000203288	TDRKH-AS1	-	TDRKH antisense RNA 1	ncRNA
9_siCtrl_WDR5_peak_5593	chr15	44486793	44487990	+	1820	NA	promoter-TSS (NM_001322950)	promoter-TSS (NM_001322950)	78	NM_001322949	84978	Hs.578544	NM_032892	ENSG00000171877	FRMD5	-	FERM domain containing 5	protein-coding
9_siCtrl_WDR5_peak_5795	chr15	66796695	66797951	+	1820	NA	promoter-TSS (NM_001287822)	promoter-TSS (NM_001287822)	-98	NM_001287822	55055	Hs.21331	NM_017975	ENSG00000174442	ZWILCH	KNTC1AP|hZwilch	zwilch kinetochore protein	protein-coding
9_siCtrl_WDR5_peak_1714	chr1	234508747	234509821	+	1818	NA	promoter-TSS (NM_001206641)	promoter-TSS (NM_001206641)	55	NR_125961	101927765	Hs.596703	NR_125961	ENSG00000231663	COA6-AS1	-	COA6 antisense RNA 1	ncRNA
9_siCtrl_WDR5_peak_2983	chr11	62598764	62599591	+	1815	NA	promoter-TSS (NR_135084)	promoter-TSS (NR_135084)	346	NM_001244666	6811	Hs.654602	NM_003164	ENSG00000162236	STX5	SED5|STX5A	syntaxin 5	protein-coding
9_siCtrl_WDR5_peak_17175	chr9	6014893	6016273	+	1815	NA	promoter-TSS (NM_001243202)	promoter-TSS (NM_001243202)	41	NM_012416	26953	Hs.167496	NM_012416	ENSG00000137040	RANBP6	-	RAN binding protein 6	protein-coding
9_siCtrl_WDR5_peak_3867	chr12	56109392	56110495	+	1815	NA	promoter-TSS (NR_037657)	promoter-TSS (NR_037657)	125	NM_001487	2647	Hs.94672	NM_001487	ENSG00000135441	BLOC1S1	BLOS1|BORCS1|GCN5L1|MICoA|RT14	biogenesis of lysosomal organelles complex 1 subunit 1	protein-coding
9_siCtrl_WDR5_peak_1864	chr10	6244953	6246315	+	1815	NA	intron (NM_001323017, intron 1 of 14)	CpG-2555	739	NM_001363545	5209	Hs.195471	NM_004566	ENSG00000170525	PFKFB3	IPFK2|PFK2|iPFK-2	6-phosphofructo-2-kinase/fructose-2,6-biphosphatase 3	protein-coding
9_siCtrl_WDR5_peak_2478	chr10	114206188	114207268	+	1811	NA	promoter-TSS (NR_134523)	promoter-TSS (NR_134523)	-11	NM_001303134	64429	Hs.196990	NM_022494	ENSG00000023041	ZDHHC6	DHHC-6|ZNF376	zinc finger DHHC-type containing 6	protein-coding
9_siCtrl_WDR5_peak_6387	chr16	21529821	21532223	+	1807	NA	non-coding (NR_002594, exon 1 of 1)	non-coding (NR_002594, exon 1 of 1)	743	NR_002594	387254	Hs.448808	NR_002594		SLC7A5P2	IMAA|MMAA	solute carrier family 7 member 5 pseudogene 2	pseudo
9_siCtrl_WDR5_peak_1774	chr1	242011010	242012156	+	1806	NA	promoter-TSS (NM_130398)	promoter-TSS (NM_130398)	77	NM_130398	9156	Hs.498248	NM_003686	ENSG00000174371	EXO1	HEX1|hExoI	exonuclease 1	protein-coding
9_siCtrl_WDR5_peak_15124	chr6	126549081	126549992	+	1804	NA	Intergenic	Intergenic	-111399	NM_001286525	387103	Hs.486401	NM_001012507	ENSG00000203760	CENPW	C6orf173|CENP-W|CUG2	centromere protein W	protein-coding
9_siCtrl_WDR5_peak_4929	chr14	21737032	21738544	+	1803	NA	promoter-TSS (NM_004500)	promoter-TSS (NM_004500)	-150	NM_004500	3183	Hs.508848	NM_004500	ENSG00000092199	HNRNPC	C1|C2|HNRNP|HNRPC|SNRPC	heterogeneous nuclear ribonucleoprotein C (C1/C2)	protein-coding
9_siCtrl_WDR5_peak_1888	chr10	12237504	12238662	+	1802	NA	promoter-TSS (NM_001321647)	promoter-TSS (NM_001321647)	60	NM_001321648	11164	Hs.555956	NM_014142	ENSG00000165609	NUDT5	YSA1|YSA1H|YSAH1|hNUDT5	nudix hydrolase 5	protein-coding
9_siCtrl_WDR5_peak_14908	chr6	91296463	91297383	+	1801	NA	promoter-TSS (NM_145331)	promoter-TSS (NM_145331)	-132	NM_145332	6885	Hs.594838	NM_003188	ENSG00000135341	MAP3K7	CSCF|FMD2|MEKK7|TAK1|TGF1a	mitogen-activated protein kinase kinase kinase 7	protein-coding
9_siCtrl_WDR5_peak_2103	chr10	53458898	53460207	+	1800	NA	promoter-TSS (NM_015235)	promoter-TSS (NM_015235)	-197	NM_015235	23283	Hs.591358	NM_015235	ENSG00000177613	CSTF2T	CstF-64T	cleavage stimulation factor subunit 2 tau variant	protein-coding
9_siCtrl_WDR5_peak_8985	chr19	50179568	50181294	+	1796	NA	promoter-TSS (NM_001536)	promoter-TSS (NM_001536)	22	NR_033397	3276	Hs.20521	NM_001536	ENSG00000126457	PRMT1	ANM1|HCP1|HRMT1L2|IR1B4	protein arginine methyltransferase 1	protein-coding
9_siCtrl_WDR5_peak_8925	chr19	47551277	47552376	+	1795	NA	promoter-TSS (NM_017854)	promoter-TSS (NM_017854)	56	NM_017854	54958	Hs.105606	NM_017854	ENSG00000130748	TMEM160	-	transmembrane protein 160	protein-coding
9_siCtrl_WDR5_peak_16335	chr7	150725261	150725983	+	1794	NA	promoter-TSS (NM_001282292)	promoter-TSS (NM_001282292)	85	NM_001282292	11194	Hs.647118	NM_007188	ENSG00000197150	ABCB8	EST328128|M-ABC1|MABC1	ATP binding cassette subfamily B member 8	protein-coding
9_siCtrl_WDR5_peak_7042	chr17	21117133	21118146	+	1792	NA	non-coding (NR_024547, exon 1 of 3)	non-coding (NR_024547, exon 1 of 3)	269	NM_003876	8834	Hs.592945	NM_003876	ENSG00000178307	TMEM11	C17orf35|PM1|PMI	transmembrane protein 11	protein-coding
9_siCtrl_WDR5_peak_2754	chr11	18343456	18344600	+	1790	NA	promoter-TSS (NM_181508)	promoter-TSS (NM_181508)	-86	NM_005316	2965	Hs.577202	NM_005316	ENSG00000110768	GTF2H1	BTF2|P62|TFB1|TFIIH	general transcription factor IIH subunit 1	protein-coding
9_siCtrl_WDR5_peak_2896	chr11	46721806	46722833	+	1787	NA	promoter-TSS (NM_001184751)	promoter-TSS (NM_001184751)	-150	NM_004308	392	Hs.138860	NM_004308	ENSG00000175220	ARHGAP1	CDC42GAP|RHOGAP|RHOGAP1|p50rhoGAP	Rho GTPase activating protein 1	protein-coding
9_siCtrl_WDR5_peak_7371	chr17	47755476	47756097	+	1787	NA	promoter-TSS (NM_001007228)	promoter-TSS (NM_001007228)	-261	NM_001007230	8405	Hs.463382	NM_003563	ENSG00000121067	SPOP	BTBD32|TEF2	speckle type BTB/POZ protein	protein-coding
9_siCtrl_WDR5_peak_2208	chr10	76585138	76586724	+	1786	NA	promoter-TSS (NM_001256468)	promoter-TSS (NM_001256468)	-240	NM_001256468	23522	Hs.35758	NM_012330	ENSG00000156650	KAT6B	GTPTS|MORF|MOZ2|MYST4|ZC2HC6B|qkf|querkopf	lysine acetyltransferase 6B	protein-coding
9_siCtrl_WDR5_peak_8653	chr19	22816404	22817505	+	1785	NA	promoter-TSS (NM_020855)	promoter-TSS (NM_020855)	-172	NM_020855	57615	Hs.232108	NM_020855	ENSG00000229676	ZNF492	ZNF115	zinc finger protein 492	protein-coding
9_siCtrl_WDR5_peak_8831	chr19	41768973	41771757	+	1782	NA	promoter-TSS (NM_001301016)	promoter-TSS (NM_001301016)	88	NM_001321208	11100	Hs.155218	NM_007040	ENSG00000105323	HNRNPUL1	E1B-AP5|E1BAP5|HNRPUL1	heterogeneous nuclear ribonucleoprotein U like 1	protein-coding
9_siCtrl_WDR5_peak_9412	chr2	31225422	31226026	+	1779	NA	intron (NM_024572, intron 1 of 14)	intron (NM_024572, intron 1 of 14)	126782	NM_001253827	79623	Hs.468058	NM_024572	ENSG00000158089	GALNT14	GALNT15|GalNac-T10|GalNac-T14	polypeptide N-acetylgalactosaminyltransferase 14	protein-coding
9_siCtrl_WDR5_peak_978	chr1	151431513	151432538	+	1777	NA	promoter-TSS (NM_001194937)	promoter-TSS (NM_001194937)	-55	NM_145796	23126	Hs.489873	NM_015100	ENSG00000143442	POGZ	MRD37|WHSUS|ZNF280E|ZNF635|ZNF635m	pogo transposable element derived with ZNF domain	protein-coding
9_siCtrl_WDR5_peak_6466	chr16	29465207	29466306	+	1775	NA	promoter-TSS (NM_001039182)	promoter-TSS (NM_001039182)	-66	NM_178044	79008	Hs.728161	NM_024044	ENSG00000181625	SLX1B	GIYD2	SLX1 homolog B, structure-specific endonuclease subunit	protein-coding
9_siCtrl_WDR5_peak_88	chr1	11322263	11323152	+	1773	NA	promoter-TSS (NM_004958)	promoter-TSS (NM_004958)	-99	NM_004958	2475	Hs.338207	NM_004958	ENSG00000198793	MTOR	FRAP|FRAP1|FRAP2|RAFT1|RAPT1|SKS	mechanistic target of rapamycin kinase	protein-coding
9_siCtrl_WDR5_peak_16011	chr7	99697844	99699584	+	1765	NA	promoter-TSS (NM_182776)	promoter-TSS (NM_182776)	-311	NM_182776	4176	Hs.438720	NM_005916	ENSG00000166508	MCM7	CDC47|MCM2|P1.1-MCM3|P1CDC47|P85MCM|PNAS146|PPP1R104	minichromosome maintenance complex component 7	protein-coding
9_siCtrl_WDR5_peak_7573	chr17	61677977	61678805	+	1765	NA	5' UTR (NM_016360, exon 1 of 5)	5' UTR (NM_016360, exon 1 of 5)	137	NM_016360	51204	Hs.174134	NM_016360	ENSG00000136463	TACO1	CCDC44	translational activator of cytochrome c oxidase I	protein-coding
9_siCtrl_WDR5_peak_6190	chr16	638882	640130	+	1761	NA	promoter-TSS (NM_001172664)	promoter-TSS (NM_001172664)	149	NM_001172663	57799	Hs.459630	NM_021168	ENSG00000197562	RAB40C	RARL|RASL8C	RAB40C, member RAS oncogene family	protein-coding
9_siCtrl_WDR5_peak_17275	chr9	33024222	33025944	+	1758	NA	promoter-TSS (NM_001539)	promoter-TSS (NM_001539)	35	NR_160923	54840	Hs.20158	NM_017692	ENSG00000137074	APTX	AOA|AOA1|AXA1|EAOH|EOAHA|FHA-HIT	aprataxin	protein-coding
9_siCtrl_WDR5_peak_7514	chr17	57230943	57233433	+	1758	NA	promoter-TSS (NM_018304)	promoter-TSS (NM_018304)	359	NM_182620	348235	Hs.463607	NM_182620	ENSG00000182628	SKA2	FAM33A	spindle and kinetochore associated complex subunit 2	protein-coding
9_siCtrl_WDR5_peak_7574	chr17	61698932	61700018	+	1755	NA	promoter-TSS (NM_001363768)	promoter-TSS (NM_001363768)	-302	NM_001363768	4215	Hs.29282	NM_002401	ENSG00000198909	MAP3K3	MAPKKK3|MEKK3	mitogen-activated protein kinase kinase kinase 3	protein-coding
9_siCtrl_WDR5_peak_13923	chr5	137088998	137090999	+	1749	NA	promoter-TSS (NM_006805)	promoter-TSS (NM_006805)	54	NM_006805	10949	Hs.96996	NM_006805	ENSG00000177733	HNRNPA0	HNRPA0	heterogeneous nuclear ribonucleoprotein A0	protein-coding
9_siCtrl_WDR5_peak_4468	chr12	132194894	132196026	+	1743	NA	promoter-TSS (NM_004592)	promoter-TSS (NM_004592)	-175	NM_004592	6433	Hs.308171	NM_004592	ENSG00000061936	SFSWAP	SFRS8|SWAP	splicing factor SWAP	protein-coding
9_siCtrl_WDR5_peak_5244	chr14	77923482	77925010	+	1740	NA	promoter-TSS (NM_001193314)	promoter-TSS (NM_001193314)	36	NM_001321441	10598	Hs.204041	NM_012111	ENSG00000100591	AHSA1	AHA1|C14orf3|hAha1|p38	activator of HSP90 ATPase activity 1	protein-coding
9_siCtrl_WDR5_peak_1408	chr1	205160253	205161184	+	1738	NA	intron (NM_199462, intron 1 of 11)	intron (NM_199462, intron 1 of 11)	20112	NM_015375	25778	Hs.6874	NM_015375	ENSG00000133059	DSTYK	CAKUT1|DustyPK|HDCMD38P|RIP5|RIPK5|SPG23	dual serine/threonine and tyrosine protein kinase	protein-coding
9_siCtrl_WDR5_peak_3645	chr12	27090986	27092591	+	1737	NA	promoter-TSS (NM_018164)	promoter-TSS (NM_018164)	385	NM_001171887	26127	Hs.591162	NM_015633	ENSG00000111790	FGFR1OP2	HSPC123-like|WIT3.0	FGFR1 oncogene partner 2	protein-coding
9_siCtrl_WDR5_peak_14214	chr5	176778283	176779258	+	1737	NA	promoter-TSS (NM_006816)	promoter-TSS (NM_006816)	-101	NM_006816	10960	Hs.75864	NM_006816	ENSG00000169223	LMAN2	C5orf8|GP36B|VIP36	lectin, mannose binding 2	protein-coding
9_siCtrl_WDR5_peak_1193	chr1	169862477	169864430	+	1733	NA	promoter-TSS (NM_020423)	promoter-TSS (NM_020423)	-353	NM_181093	57147	Hs.435560	NM_020423	ENSG00000000457	SCYL3	PACE-1|PACE1	SCY1 like pseudokinase 3	protein-coding
9_siCtrl_WDR5_peak_2408	chr10	104004725	104005803	+	1733	NA	promoter-TSS (NM_001199379)	promoter-TSS (NM_001199379)	-25	NM_001199378	8729	Hs.290243	NM_004193	ENSG00000107862	GBF1	ARF1GEF	golgi brefeldin A resistant guanine nucleotide exchange factor 1	protein-coding
9_siCtrl_WDR5_peak_5113	chr14	60630610	60632622	+	1729	NA	intron (NM_001322280, intron 1 of 6)	intron (NM_001322280, intron 1 of 6)	500	NM_016029	51635	Hs.59719	NM_016029	ENSG00000100612	DHRS7	CGI-86|SDR34C1|retDSR4|retSDR4	dehydrogenase/reductase 7	protein-coding
9_siCtrl_WDR5_peak_10951	chr20	46669734	46670683	+	1728	NA	Intergenic	Intergenic	-51347	NR_110027	101927457	Hs.445823	NR_110027		LINC01522	-	long intergenic non-protein coding RNA 1522	ncRNA
9_siCtrl_WDR5_peak_8558	chr19	15529200	15530247	+	1726	NA	promoter-TSS (NR_111971)	promoter-TSS (NR_111971)	76	NM_014371	26993	Hs.399800	NM_014371	ENSG00000011243	AKAP8L	HA95|HAP95|NAKAP|NAKAP95	A-kinase anchoring protein 8 like	protein-coding
9_siCtrl_WDR5_peak_9006	chr19	51610596	51611936	+	1726	NA	intron (NM_145232, intron 1 of 2)	intron (NM_145232, intron 1 of 2)	400	NM_145232	90353	Hs.148425	NM_145232	ENSG00000142544	CTU1	ATPBD3|NCS6	cytosolic thiouridylase subunit 1	protein-coding
9_siCtrl_WDR5_peak_10714	chr20	18268530	18269589	+	1726	NA	promoter-TSS (NM_001283002)	promoter-TSS (NM_001283002)	-112	NM_001352458	7692	Hs.472221	NM_003434	ENSG00000125846	ZNF133	ZNF150|pHZ-13|pHZ-66	zinc finger protein 133	protein-coding
9_siCtrl_WDR5_peak_8540	chr19	14228461	14228952	+	1725	NA	promoter-TSS (NM_002730)	promoter-TSS (NM_002730)	-132	NM_002730	5566	Hs.631630	NM_002730	ENSG00000072062	PRKACA	PKACA|PPNAD4	protein kinase cAMP-activated catalytic subunit alpha	protein-coding
9_siCtrl_WDR5_peak_298	chr1	43388940	43390528	+	1724	NA	Intergenic	Intergenic	34805	NM_006516	6513	Hs.473721	NM_006516	ENSG00000117394	SLC2A1	CSE|DYT17|DYT18|DYT9|EIG12|GLUT|GLUT-1|GLUT1|GLUT1DS|HTLVR|PED|SDCHCN	solute carrier family 2 member 1	protein-coding
9_siCtrl_WDR5_peak_10611	chr20	306556	308760	+	1721	NA	3' UTR (NM_006943, exon 1 of 1)	3' UTR (NM_006943, exon 1 of 1)	1443	NM_006943	6666	Hs.43627	NM_006943	ENSG00000177732	SOX12	SOX22	SRY-box transcription factor 12	protein-coding
9_siCtrl_WDR5_peak_7345	chr17	46048084	46049078	+	1720	NA	intron (NM_001278198, intron 1 of 12)	CpG	102	NM_001278198	80279	Hs.20157	NM_025197	ENSG00000108465	CDK5RAP3	C53|HSF-27|IC53|LZAP|MST016|OK/SW-cl.114|PP1553	CDK5 regulatory subunit associated protein 3	protein-coding
9_siCtrl_WDR5_peak_8501	chr19	12779960	12781017	+	1718	NA	promoter-TSS (NM_032332)	promoter-TSS (NM_032332)	-79	NM_032332	84292	Hs.657204	NM_032332	ENSG00000123154	WDR83	MORG1	WD repeat domain 83	protein-coding
9_siCtrl_WDR5_peak_9702	chr2	70313184	70315892	+	1713	NA	promoter-TSS (NM_006196)	promoter-TSS (NM_006196)	-71	NM_006196	5093	Hs.2853	NM_006196	ENSG00000169564	PCBP1	HEL-S-85|HNRPE1|HNRPX|hnRNP-E1|hnRNP-X	poly(rC) binding protein 1	protein-coding
9_siCtrl_WDR5_peak_6994	chr17	17494697	17495490	+	1710	NA	promoter-TSS (NM_148172)	promoter-TSS (NM_148172)	-71	NM_001267551	10400	Hs.714193	NM_007169	ENSG00000133027	PEMT	PEAMT|PEMPT|PEMT2|PLMT|PNMT	phosphatidylethanolamine N-methyltransferase	protein-coding
9_siCtrl_WDR5_peak_8538	chr19	14191796	14192542	+	1710	NA	TTS (NM_001277378)	TTS (NM_001277378)	4426	NM_001277378	646457	Hs.569971	NM_001277378	ENSG00000188032	C19orf67	-	chromosome 19 open reading frame 67	protein-coding
9_siCtrl_WDR5_peak_3359	chr11	118306568	118307268	+	1709	NA	promoter-TSS (NM_001197104)	promoter-TSS (NM_001197104)	-287	NM_001197104	4297	Hs.258855	NM_005933	ENSG00000118058	KMT2A	ALL-1|CXXC7|HRX|HTRX1|MLL|MLL1|MLL1A|TRX1|WDSTS	lysine methyltransferase 2A	protein-coding
9_siCtrl_WDR5_peak_2421	chr10	104404073	104406128	+	1703	NA	intron (NM_001345950, intron 1 of 4)	intron (NM_001345950, intron 1 of 4)	848	NM_001345950	81603	Hs.336810	NM_030912	ENSG00000171206	TRIM8	GERP|RNF27	tripartite motif containing 8	protein-coding
9_siCtrl_WDR5_peak_14965	chr6	105307049	105307956	+	1701	NA	promoter-TSS (NM_001321083)	promoter-TSS (NM_001321083)	-81	NM_001321084	57531	Hs.434340	NM_020771	ENSG00000085382	HACE1	SPPRS	HECT domain and ankyrin repeat containing E3 ubiquitin protein ligase 1	protein-coding
9_siCtrl_WDR5_peak_14017	chr5	149737130	149737827	+	1700	NA	intron (NM_001008657, intron 1 of 17)	CpG	218	NM_000356	6949	Hs.519672	NM_000356	ENSG00000070814	TCOF1	MFD1|TCS|TCS1|treacle	treacle ribosome biogenesis factor 1	protein-coding
9_siCtrl_WDR5_peak_6491	chr16	30381653	30382711	+	1700	NA	promoter-TSS (NM_001324459)	promoter-TSS (NM_001324459)	-73	NM_001324459	29895	Hs.50889	NM_013292	ENSG00000180209	MYLPF	HUMMLC2B|MLC2B|MRLC2|MYL11	myosin light chain, phosphorylatable, fast skeletal muscle	protein-coding
9_siCtrl_WDR5_peak_8936	chr19	48111281	48112165	+	1699	NA	intron (NM_015711, intron 1 of 14)	CpG	270	NM_015711	29998	Hs.97244	NM_015711	ENSG00000063169	BICRA	GLTSCR1	BRD4 interacting chromatin remodeling complex associated protein	protein-coding
9_siCtrl_WDR5_peak_8392	chr19	6279864	6280514	+	1685	NA	promoter-TSS (NM_005934)	promoter-TSS (NM_005934)	-203	NM_005934	4298	Hs.10095	NM_005934	ENSG00000130382	MLLT1	ENL|LTG19|YEATS1	MLLT1 super elongation complex subunit	protein-coding
9_siCtrl_WDR5_peak_8251	chr18	77438970	77440230	+	1684	NA	promoter-TSS (NM_001318511)	promoter-TSS (NM_001318511)	145	NR_136643	284241		NR_136643	ENSG00000178412	LOC284241	-	uncharacterized LOC284241	ncRNA
9_siCtrl_WDR5_peak_17532	chr9	96927866	96929508	+	1684	NA	Intergenic	CpG	-9552	NR_029476	406881		NR_029476	ENSG00000199165	MIRLET7A1	LET7A1|MIRNLET7A1|let-7a-1	microRNA let-7a-1	ncRNA
9_siCtrl_WDR5_peak_16690	chr8	56684770	56686484	+	1679	NA	promoter-TSS (NM_001317902)	promoter-TSS (NM_001317902)	310	NM_001363177	137695	Hs.420076	NM_152417	ENSG00000167904	TMEM68	-	transmembrane protein 68	protein-coding
9_siCtrl_WDR5_peak_8939	chr19	48248243	48249242	+	1679	NA	promoter-TSS (NM_015710)	promoter-TSS (NM_015710)	-61	NM_015710	29997	Hs.421907	NM_015710	ENSG00000105373	NOP53	GLTSCR2|PICT-1|PICT1	NOP53 ribosome biogenesis factor	protein-coding
9_siCtrl_WDR5_peak_1454	chr1	208905439	208906191	+	1678	NA	intron (NR_146914, intron 3 of 3)	intron (NR_146914, intron 3 of 3)	3782	NR_146914	105372893	Hs.568720	NR_146914	ENSG00000232812	LINC01717	-	long intergenic non-protein coding RNA 1717	ncRNA
9_siCtrl_WDR5_peak_15163	chr6	135375302	135376343	+	1677	NA	exon (NM_001145158, exon 1 of 17)	exon (NM_001145158, exon 1 of 17)	138	NM_006620	10767	Hs.378532	NM_006620	ENSG00000112339	HBS1L	EF-1a|ERFS|HBS1|HSPC276|eRF3c	HBS1 like translational GTPase	protein-coding
9_siCtrl_WDR5_peak_958	chr1	150669277	150670074	+	1674	NA	promoter-TSS (NM_018178)	promoter-TSS (NM_018178)	-45	NM_018178	55204	Hs.203699	NM_018178	ENSG00000143457	GOLPH3L	GPP34R	golgi phosphoprotein 3 like	protein-coding
9_siCtrl_WDR5_peak_231	chr1	33501921	33502927	+	1670	NA	promoter-TSS (NR_134976)	promoter-TSS (NR_134976)	60	NM_001319142	204	Hs.470907	NM_001625	ENSG00000004455	AK2	ADK2	adenylate kinase 2	protein-coding
9_siCtrl_WDR5_peak_14553	chr6	30875502	30876244	+	1669	NA	promoter-TSS (NM_001517)	promoter-TSS (NM_001517)	-111	NM_001517	2968	Hs.485070	NM_001517	ENSG00000213780	GTF2H4	P52|TFB2|TFIIH	general transcription factor IIH subunit 4	protein-coding
9_siCtrl_WDR5_peak_15951	chr7	91056359	91056851	+	1661	NA	Intergenic	Intergenic	162857	NM_003505	8321	Hs.94234	NM_003505	ENSG00000157240	FZD1	-	frizzled class receptor 1	protein-coding
9_siCtrl_WDR5_peak_15206	chr6	143591927	143592600	+	1657	NA	intron (NM_001366354, intron 3 of 4)	intron (NM_001366354, intron 3 of 4)	106344	NM_001366361	51390	Hs.567501	NM_016108	ENSG00000146416	AIG1	AIG-1|dJ95L4.1	androgen induced 1	protein-coding
9_siCtrl_WDR5_peak_6873	chr17	4870141	4871310	+	1656	NA	TTS (NM_001171168)	TTS (NM_001171168)	387	NM_004890	9552	Hs.90436	NM_004890	ENSG00000091640	SPAG7	ACRP|FSA-1	sperm associated antigen 7	protein-coding
9_siCtrl_WDR5_peak_6258	chr16	3081171	3081908	+	1653	NA	promoter-TSS (NR_047572)	promoter-TSS (NR_047572)	-943	NR_047572	100128770	Hs.666223	NR_047572	ENSG00000205890	LOC100128770	-	uncharacterized LOC100128770	ncRNA
9_siCtrl_WDR5_peak_151	chr1	23856916	23858216	+	1648	NA	5' UTR (NM_004091, exon 1 of 7)	5' UTR (NM_004091, exon 1 of 7)	159	NM_004091	1870	Hs.194333	NM_004091	ENSG00000007968	E2F2	E2F-2	E2F transcription factor 2	protein-coding
9_siCtrl_WDR5_peak_12355	chr3	149824494	149825479	+	1647	NA	intron (NR_136187, intron 1 of 2)	intron (NR_136187, intron 1 of 2)	10756	NR_136187	105374313	Hs.151216	NR_136187		LOC105374313	-	uncharacterized LOC105374313	ncRNA
9_siCtrl_WDR5_peak_16424	chr8	10190226	10191610	+	1647	NA	intron (NM_001199729, intron 6 of 6)	intron (NM_001199729, intron 6 of 6)	-141157	NR_120604	101929191	Hs.595262	NR_120604	ENSG00000253641	LINCR-0001	-	uncharacterized LINCR-0001	ncRNA
9_siCtrl_WDR5_peak_5134	chr14	64804700	64806020	+	1644	NA	promoter-TSS (NM_001291723)	promoter-TSS (NM_001291723)	-29	NR_073496	2100	Hs.660607	NM_001437	ENSG00000140009	ESR2	ER-BETA|ESR-BETA|ESRB|ESTRB|Erb|NR3A2|ODG8	estrogen receptor 2	protein-coding
9_siCtrl_WDR5_peak_13007	chr4	102267054	102269246	+	1644	NA	promoter-TSS (NR_033874)	promoter-TSS (NR_033874)	533	NM_001130692	5530	Hs.435512	NM_000944	ENSG00000138814	PPP3CA	ACCIID|CALN|CALNA|CALNA1|CCN1|CNA1|IECEE|IECEE1|PPP2B	protein phosphatase 3 catalytic subunit alpha	protein-coding
9_siCtrl_WDR5_peak_3981	chr12	67662175	67664291	+	1643	NA	promoter-TSS (NM_018448)	promoter-TSS (NM_018448)	95	NM_001329674	55832	Hs.546407	NM_018448	ENSG00000111530	CAND1	TIP120|TIP120A	cullin associated and neddylation dissociated 1	protein-coding
9_siCtrl_WDR5_peak_6060	chr15	89631079	89631998	+	1641	NA	promoter-TSS (NM_152924)	promoter-TSS (NM_152924)	-149	NM_007011	11057	Hs.122337	NM_007011	ENSG00000140526	ABHD2	HS1-2|LABH2|PHPS1-2	abhydrolase domain containing 2	protein-coding
9_siCtrl_WDR5_peak_15874	chr7	73588117	73589365	+	1640	NA	promoter-TSS (NM_022170)	promoter-TSS (NM_022170)	55	NM_031992	7458	Hs.520943	NM_022170	ENSG00000106682	EIF4H	WBSCR1|WSCR1|eIF-4H	eukaryotic translation initiation factor 4H	protein-coding
9_siCtrl_WDR5_peak_9639	chr2	63815207	63816742	+	1639	NA	promoter-TSS (NM_001199112)	promoter-TSS (NM_001199112)	-123	NM_001316374	4190	Hs.526521	NM_005917	ENSG00000014641	MDH1	HEL-S-32|MDH-s|MDHA|MGC:1375|MOR2	malate dehydrogenase 1	protein-coding
9_siCtrl_WDR5_peak_7320	chr17	44301732	44303446	+	1637	NA	intron (NM_001193465, intron 1 of 15)	intron (NM_001193465, intron 1 of 15)	151	NM_001193465	284058	Hs.648744	NM_015443	ENSG00000120071	KANSL1	CENP-36|KDVS|KIAA1267|MSL1v1|NSL1|hMSL1v1	KAT8 regulatory NSL complex subunit 1	protein-coding
9_siCtrl_WDR5_peak_2069	chr10	46222174	46223048	+	1631	NA	promoter-TSS (NM_015262)	promoter-TSS (NM_015262)	-103	NR_159966	253725	Hs.365286	NM_015262	ENSG00000172661	WASHC2C	FAM21A|FAM21C|VPEF	WASH complex subunit 2C	protein-coding
9_siCtrl_WDR5_peak_9681	chr2	67929274	67929855	+	1631	NA	Intergenic	Intergenic	123130	NR_110271	101927701	Hs.348697	NR_110271	ENSG00000237013	LINC01812	-	long intergenic non-protein coding RNA 1812	ncRNA
9_siCtrl_WDR5_peak_9640	chr2	64067671	64069153	+	1629	NA	promoter-TSS (NM_006759)	promoter-TSS (NM_006759)	314	NM_001001521	7360	Hs.516217	NM_006759	ENSG00000169764	UGP2	UDPG|UDPGP|UDPGP2|UGP1|UGPP1|UGPP2|pHC379	UDP-glucose pyrophosphorylase 2	protein-coding
9_siCtrl_WDR5_peak_6523	chr16	30968164	30969762	+	1627	NA	promoter-TSS (NM_014712)	promoter-TSS (NM_014712)	-112	NM_014712	9739	Hs.297483	NM_014712	ENSG00000099381	SETD1A	KMT2F|Set1|Set1A	SET domain containing 1A, histone lysine methyltransferase	protein-coding
9_siCtrl_WDR5_peak_9195	chr2	5175124	5175676	+	1627	NA	Intergenic	Intergenic	-471588	NR_034134	727982	Hs.444391	NR_034134	ENSG00000231532	LINC01249	-	long intergenic non-protein coding RNA 1249	ncRNA
9_siCtrl_WDR5_peak_5084	chr14	55877987	55878941	+	1627	NA	exon (NM_014924, exon 1 of 10)	exon (NM_014924, exon 1 of 10)	112	NM_014924	22863	Hs.414809	NM_014924	ENSG00000126775	ATG14	ATG14L|BARKOR|KIAA0831	autophagy related 14	protein-coding
9_siCtrl_WDR5_peak_2895	chr11	46638358	46639528	+	1625	NA	promoter-TSS (NM_173811)	promoter-TSS (NM_173811)	117	NM_001346320	9776	Hs.127403	NM_014741	ENSG00000175224	ATG13	KIAA0652|PARATARG8	autophagy related 13	protein-coding
9_siCtrl_WDR5_peak_8394	chr19	6372363	6373199	+	1624	NA	promoter-TSS (NM_032306)	promoter-TSS (NM_032306)	-24	NM_032306	84266	Hs.111099	NM_032306	ENSG00000125652	ALKBH7	ABH7|SPATA11|UNQ6002	alkB homolog 7	protein-coding
9_siCtrl_WDR5_peak_11639	chr3	4508506	4509298	+	1622	NA	promoter-TSS (NM_001164674)	promoter-TSS (NM_001164674)	51	NM_182760	285362	Hs.350475	NM_182760	ENSG00000144455	SUMF1	AAPA3037|FGE|UNQ3037	sulfatase modifying factor 1	protein-coding
9_siCtrl_WDR5_peak_1586	chr1	221447423	221448579	+	1621	NA	Intergenic	Intergenic	61637	NR_024236	400804	Hs.722626	NR_024236	ENSG00000234754	C1orf140	-	uncharacterized LOC400804	ncRNA
9_siCtrl_WDR5_peak_5556	chr15	41624385	41626039	+	1618	NA	promoter-TSS (NM_001317860)	promoter-TSS (NM_001317860)	133	NM_001301136	51203	Hs.615092	NM_016359	ENSG00000137804	NUSAP1	ANKT|BM037|LNP|NUSAP|PRO0310p1|Q0310|SAPL	nucleolar and spindle associated protein 1	protein-coding
9_siCtrl_WDR5_peak_16166	chr7	128170736	128172392	+	1616	NA	Intergenic	CpG	54781	NM_018396	55798	Hs.433213	NM_018396	ENSG00000165055	METTL2B	METL|METTL2|METTL2A|PSENIP1	methyltransferase like 2B	protein-coding
9_siCtrl_WDR5_peak_11083	chr20	61592245	61593124	+	1616	NA	intron (NM_022082, intron 4 of 12)	intron (NM_022082, intron 4 of 12)	8623	NM_001302643	63910	Hs.512686	NM_022082	ENSG00000101194	SLC17A9	C20orf59|POROK8|VNUT	solute carrier family 17 member 9	protein-coding
9_siCtrl_WDR5_peak_10931	chr20	45034857	45035614	+	1615	NA	promoter-TSS (NM_133171)	promoter-TSS (NM_133171)	19	NM_133171	63916	Hs.210469	NM_022086	ENSG00000062598	ELMO2	CED-12|CED12|Ced-12A|ELMO-2|VMPI	engulfment and cell motility 2	protein-coding
9_siCtrl_WDR5_peak_7175	chr17	37843811	37844974	+	1613	NA	promoter-TSS (NM_033419)	promoter-TSS (NM_033419)	55	NM_001289936	2064	Hs.446352	NM_004448	ENSG00000141736	ERBB2	CD340|HER-2|HER-2/neu|HER2|MLN 19|NEU|NGL|TKR1	erb-b2 receptor tyrosine kinase 2	protein-coding
9_siCtrl_WDR5_peak_14440	chr6	24775048	24776007	+	1612	NA	promoter-TSS (NM_001251991)	promoter-TSS (NM_001251991)	-114	NM_001251991	51053	Hs.234896	NM_015895	ENSG00000112312	GMNN	Gem|MGORS6	geminin DNA replication inhibitor	protein-coding
9_siCtrl_WDR5_peak_7555	chr17	60004661	60005431	+	1610	NA	5' UTR (NM_001351695, exon 1 of 25)	5' UTR (NM_001351695, exon 1 of 25)	297	NM_001351695	57508	Hs.279646	NM_020748	ENSG00000108506	INTS2	INT2|KIAA1287	integrator complex subunit 2	protein-coding
9_siCtrl_WDR5_peak_7730	chr17	73389611	73390802	+	1610	NA	intron (NM_203506, intron 1 of 4)	intron (NM_203506, intron 1 of 4)	11553	NM_002086	2885	Hs.444356	NM_002086	ENSG00000177885	GRB2	ASH|EGFRBP-GRB2|Grb3-3|MST084|MSTP084|NCKAP2	growth factor receptor bound protein 2	protein-coding
9_siCtrl_WDR5_peak_9005	chr19	51307040	51308366	+	1610	NA	intron (NM_001290149, intron 1 of 5)	CpG	148	NM_032712	84798	Hs.256301	NM_032712	ENSG00000167747	C19orf48	-	chromosome 19 open reading frame 48	protein-coding
9_siCtrl_WDR5_peak_15397	chr7	1543597	1544313	+	1609	NA	promoter-TSS (NM_001080453)	promoter-TSS (NM_001080453)	70	NM_001080453	26173	Hs.532188	NM_001080453	ENSG00000164880	INTS1	INT1|NET28	integrator complex subunit 1	protein-coding
9_siCtrl_WDR5_peak_3855	chr12	54718364	54719339	+	1609	NA	promoter-TSS (NM_001271734)	promoter-TSS (NM_001271734)	-64	NR_073424	22818	Hs.505652	NM_016057	ENSG00000111481	COPZ1	CGI-120|COPZ|HSPC181|zeta-COP|zeta1-COP	coatomer protein complex subunit zeta 1	protein-coding
9_siCtrl_WDR5_peak_7228	chr17	40984822	40985909	+	1609	NA	promoter-TSS (NM_001330229)	promoter-TSS (NM_001330229)	-49	NM_001267045	10197	Hs.152978	NM_005789	ENSG00000131467	PSME3	HEL-S-283|Ki|PA28-gamma|PA28G|PA28gamma|REG-GAMMA	proteasome activator subunit 3	protein-coding
9_siCtrl_WDR5_peak_3520	chr12	6797838	6799101	+	1604	NA	promoter-TSS (NM_133476)	promoter-TSS (NM_133476)	72	NM_133476	171017	Hs.103315	NM_133476	ENSG00000126746	ZNF384	CAGH1|CAGH1A|CIZ|ERDA2|NMP4|NP|TNRC1	zinc finger protein 384	protein-coding
9_siCtrl_WDR5_peak_10747	chr20	21283222	21284726	+	1598	NA	promoter-TSS (NM_001317960)	promoter-TSS (NM_001317960)	5	NM_012255	22803	Hs.255932	NM_012255	ENSG00000088930	XRN2	-	5'-3' exoribonuclease 2	protein-coding
9_siCtrl_WDR5_peak_112	chr1	16693680	16694952	+	1594	NA	intron (NR_073500, intron 1 of 1)	intron (NR_073500, intron 1 of 1)	579	NR_073502	26099	Hs.252967	NM_001114600	ENSG00000055070	SZRD1	C1orf144	SUZ RNA binding domain containing 1	protein-coding
9_siCtrl_WDR5_peak_16984	chr8	121456914	121458005	+	1594	NA	promoter-TSS (NM_022045)	promoter-TSS (NM_022045)	-69	NM_014078	28998	Hs.333823	NM_014078	ENSG00000172172	MRPL13	L13|L13A|L13mt|RPL13|RPML13	mitochondrial ribosomal protein L13	protein-coding
9_siCtrl_WDR5_peak_8597	chr19	18303147	18304378	+	1592	NA	promoter-TSS (NM_032683)	promoter-TSS (NM_032683)	-266	NM_032683	84769	Hs.515254	NM_032683	ENSG00000254858	MPV17L2	FKSG24	MPV17 mitochondrial inner membrane protein like 2	protein-coding
9_siCtrl_WDR5_peak_6138	chr15	98503516	98504368	+	1590	NA	promoter-TSS (NM_183376)	promoter-TSS (NM_183376)	9	NM_183376	91947	Hs.6093	NM_183376	ENSG00000140450	ARRDC4	-	arrestin domain containing 4	protein-coding
9_siCtrl_WDR5_peak_5150	chr14	68162137	68163279	+	1589	NA	promoter-TSS (NM_001252650)	promoter-TSS (NM_001252650)	-227	NM_016026	51109	Hs.719925	NM_016026	ENSG00000072042	RDH11	ARSDR1|CGI82|HCBP12|MDT1|PSDR1|RALR1|RDJCSS|SCALD|SDR7C1	retinol dehydrogenase 11	protein-coding
9_siCtrl_WDR5_peak_3890	chr12	56726711	56728502	+	1589	NA	promoter-TSS (NM_001127460)	promoter-TSS (NM_001127460)	-104	NM_001127460	9924	Hs.273397	NM_014871	ENSG00000135473	PAN2	USP52	poly(A) specific ribonuclease subunit PAN2	protein-coding
9_siCtrl_WDR5_peak_7338	chr17	45726389	45728536	+	1589	NA	promoter-TSS (NM_001276453)	promoter-TSS (NM_001276453)	177	NM_002265	3837	Hs.532793	NM_002265	ENSG00000108424	KPNB1	IMB1|IPO1|IPOB|Impnb|NTF97	karyopherin subunit beta 1	protein-coding
9_siCtrl_WDR5_peak_9915	chr2	105953513	105954080	+	1589	NA	promoter-TSS (NM_024093)	promoter-TSS (NM_024093)	-201	NM_001286537	79074	Hs.549577	NM_024093	ENSG00000135974	C2orf49	asw	chromosome 2 open reading frame 49	protein-coding
9_siCtrl_WDR5_peak_7732	chr17	73452138	73453826	+	1589	NA	intron (NM_014738, intron 1 of 31)	intron (NM_014738, intron 1 of 31)	266	NM_001351202	9772	Hs.514474	NM_014738	ENSG00000177728	TMEM94	IDDCDF|KIAA0195	transmembrane protein 94	protein-coding
9_siCtrl_WDR5_peak_1317	chr1	192458206	192458657	+	1589	NA	Intergenic	Intergenic	-86472	NM_002922	5996	Hs.75256	NM_002922	ENSG00000090104	RGS1	1R20|BL34|HEL-S-87|IER1|IR20	regulator of G protein signaling 1	protein-coding
9_siCtrl_WDR5_peak_5014	chr14	36295306	36296469	+	1585	NA	intron (NM_032352, intron 1 of 9)	CpG	343	NM_032352	84312	Hs.525299	NM_032352	ENSG00000100916	BRMS1L	BRMS1	BRMS1 like transcriptional repressor	protein-coding
9_siCtrl_WDR5_peak_10331	chr2	200819925	200821093	+	1580	NA	promoter-TSS (NM_001039693)	promoter-TSS (NM_001039693)	-295	NR_109905	129450	Hs.204619	NM_152382	ENSG00000162971	TYW5	C2orf60|hTYW5	tRNA-yW synthesizing protein 5	protein-coding
9_siCtrl_WDR5_peak_3056	chr11	65769406	65770290	+	1579	NA	promoter-TSS (NM_032325)	promoter-TSS (NM_032325)	-126	NM_003860	8815	Hs.433759	NM_003860	ENSG00000175334	BANF1	BAF|BCRP1|D14S1460|NGPS	barrier to autointegration factor 1	protein-coding
9_siCtrl_WDR5_peak_9621	chr2	61243998	61245674	+	1577	NA	promoter-TSS (NM_002618)	promoter-TSS (NM_002618)	-19	NM_002618	5194	Hs.161377	NM_002618	ENSG00000162928	PEX13	NALD|PBD11A|PBD11B|ZWS	peroxisomal biogenesis factor 13	protein-coding
9_siCtrl_WDR5_peak_16537	chr8	27168403	27169488	+	1576	NA	promoter-TSS (NM_001304495)	promoter-TSS (NM_001304495)	-50	NM_173174	2185	Hs.491322	NM_004103	ENSG00000120899	PTK2B	CADTK|CAKB|FADK2|FAK2|PKB|PTK|PYK2|RAFTK	protein tyrosine kinase 2 beta	protein-coding
9_siCtrl_WDR5_peak_3535	chr12	7078947	7080413	+	1575	NA	promoter-TSS (NM_006331)	promoter-TSS (NM_006331)	147	NM_001144831	11331	Hs.504620	NM_001144831	ENSG00000215021	PHB2	BAP|BCAP37|Bap37|PNAS-141|REA|hBAP|p22	prohibitin 2	protein-coding
9_siCtrl_WDR5_peak_10657	chr20	3869384	3871059	+	1573	NA	promoter-TSS (NM_001324193)	promoter-TSS (NM_001324193)	187	NR_136715	80025	Hs.114180	NM_024960	ENSG00000125779	PANK2	C20orf48|HARP|HSS|NBIA1|PKAN	pantothenate kinase 2	protein-coding
9_siCtrl_WDR5_peak_2907	chr11	47447532	47448404	+	1569	NA	promoter-TSS (NM_002804)	promoter-TSS (NM_002804)	56	NM_002804	5702	Hs.250758	NM_002804	ENSG00000165916	PSMC3	TBP1	proteasome 26S subunit, ATPase 3	protein-coding
9_siCtrl_WDR5_peak_653	chr1	91300250	91301174	+	1566	NA	intron (NR_147930, intron 1 of 1)	intron (NR_147930, intron 1 of 1)	1006	NR_147932	105378853	Hs.546492	NR_135038	ENSG00000233593	LINC02609	-	long intergenic non-protein coding RNA 2609	ncRNA
9_siCtrl_WDR5_peak_7870	chr17	79678740	79679799	+	1563	NA	promoter-TSS (NM_001270888)	promoter-TSS (NM_001270888)	3	NM_001270953	1468	Hs.548187	NM_012140	ENSG00000183048	SLC25A10	DIC	solute carrier family 25 member 10	protein-coding
9_siCtrl_WDR5_peak_11545	chr22	43252744	43253790	+	1559	NA	promoter-TSS (NM_014570)	promoter-TSS (NM_014570)	12	NM_001142293	26286	Hs.685225	NM_014570	ENSG00000242247	ARFGAP3	ARFGAP1	ADP ribosylation factor GTPase activating protein 3	protein-coding
9_siCtrl_WDR5_peak_7578	chr17	61903952	61905657	+	1559	NA	promoter-TSS (NM_001199163)	promoter-TSS (NM_001199163)	13	NM_002805	5705	Hs.79387	NM_002805	ENSG00000087191	PSMC5	S8|SUG-1|SUG1|TBP10|TRIP1|p45|p45/SUG	proteasome 26S subunit, ATPase 5	protein-coding
9_siCtrl_WDR5_peak_8326	chr19	2950075	2950824	+	1558	NA	Intergenic	CpG	-5480	NM_021217	58492	Hs.38004	NM_021217	ENSG00000175691	ZNF77	pT1	zinc finger protein 77	protein-coding
9_siCtrl_WDR5_peak_9260	chr2	11605475	11606577	+	1557	NA	non-coding (NR_103490, exon 1 of 5)	non-coding (NR_103490, exon 1 of 5)	261	NM_212540	1876	Hs.603093	NM_198256	ENSG00000169016	E2F6	E2F-6	E2F transcription factor 6	protein-coding
9_siCtrl_WDR5_peak_17326	chr9	37079181	37080381	+	1554	NA	promoter-TSS (NR_036592)	promoter-TSS (NR_036592)	-112	NR_036592	100506710	Hs.446271	NR_036592	ENSG00000281649	EBLN3P	EBLN3	endogenous Bornavirus like nucleoprotein 3, pseudogene	pseudo
9_siCtrl_WDR5_peak_5554	chr15	41522638	41523823	+	1553	NA	promoter-TSS (NM_007236)	promoter-TSS (NM_007236)	-236	NM_007236	11261	Hs.406234	NM_007236	ENSG00000187446	CHP1	CHP|SLC9A1BP|SPAX9|Sid470p|p22|p24	calcineurin like EF-hand protein 1	protein-coding
9_siCtrl_WDR5_peak_5285	chr14	90848886	90850092	+	1551	NA	Intergenic	CpG	-13357	NM_001363669	801	Hs.282410	NM_006888	ENSG00000198668	CALM1	CALML2|CAM2|CAM3|CAMB|CAMC|CAMI|CAMIII|CPVT4|DD132|LQT14|PHKD|caM	calmodulin 1	protein-coding
9_siCtrl_WDR5_peak_13643	chr5	74062527	74063726	+	1546	NA	promoter-TSS (NM_001364506)	promoter-TSS (NM_001364506)	52	NR_073403	10412	Hs.482526	NM_014886	ENSG00000164346	NSA2	CDK105|HCL-G1|HCLG1|HUSSY-29|HUSSY29|TINP1	NSA2 ribosome biogenesis factor	protein-coding
9_siCtrl_WDR5_peak_3108	chr11	71639016	71640259	+	1546	NA	promoter-TSS (NR_029192)	promoter-TSS (NR_029192)	-131	NR_024148	55298	Hs.368554	NM_018320	ENSG00000137522	RNF121	-	ring finger protein 121	protein-coding
9_siCtrl_WDR5_peak_5213	chr14	75642902	75643853	+	1544	NA	promoter-TSS (NM_006827)	promoter-TSS (NM_006827)	-62	NM_006827	10972	Hs.74137	NM_006827	ENSG00000170348	TMED10	P24(DELTA)|S31I125|S31III125|TMP21|Tmp-21-I|p23|p24d1	transmembrane p24 trafficking protein 10	protein-coding
9_siCtrl_WDR5_peak_782	chr1	110229896	110231012	+	1543	NA	promoter-TSS (NM_146421)	promoter-TSS (NM_146421)	15	NM_000561	2944	Hs.301961	NM_000561	ENSG00000134184	GSTM1	GST1|GSTM1-1|GSTM1a-1a|GSTM1b-1b|GTH4|GTM1|H-B|MU|MU-1	glutathione S-transferase mu 1	protein-coding
9_siCtrl_WDR5_peak_9353	chr2	27008251	27009356	+	1542	NA	promoter-TSS (NM_001809)	promoter-TSS (NM_001809)	-80	NM_001042426	1058	Hs.1594	NM_001809	ENSG00000115163	CENPA	CENP-A|CenH3	centromere protein A	protein-coding
9_siCtrl_WDR5_peak_6226	chr16	2204896	2206111	+	1542	NA	promoter-TSS (NR_132114)	promoter-TSS (NR_132114)	-144	NR_132114	100507303	Hs.369728	NR_132114	ENSG00000260260	SNHG19	SNORD60HG	small nucleolar RNA host gene 19	ncRNA
9_siCtrl_WDR5_peak_9545	chr2	47925505	47926195	+	1541	NA	Intergenic	LTR8|LTR|ERV1	-84371	NM_000179	2956	Hs.445052	NM_000179	ENSG00000116062	MSH6	GTBP|GTMBP|HNPCC5|HSAP|p160	mutS homolog 6	protein-coding
9_siCtrl_WDR5_peak_1163	chr1	166808268	166809959	+	1540	NA	intron (NM_001314014, intron 1 of 3)	CpG	401	NM_017542	57645	Hs.432752	NM_017542	ENSG00000143157	POGK	BASS2|KRBOX2|LST003	pogo transposable element derived with KRAB domain	protein-coding
9_siCtrl_WDR5_peak_3857	chr12	54752686	54753351	+	1537	NA	intron (NR_120487, intron 1 of 3)	intron (NR_120487, intron 1 of 3)	5252	NM_020370	53831	Hs.306199	NM_020370	ENSG00000139572	GPR84	EX33|GPCR4	G protein-coupled receptor 84	protein-coding
9_siCtrl_WDR5_peak_4628	chr13	41837390	41838105	+	1536	NA	promoter-TSS (NM_004294)	promoter-TSS (NM_004294)	-35	NM_004294	9617	Hs.382176	NM_004294	ENSG00000120662	MTRF1	MRF1|MTTRF1|RF1	mitochondrial translation release factor 1	protein-coding
9_siCtrl_WDR5_peak_218	chr1	32110023	32110962	+	1536	NA	promoter-TSS (NM_001359651)	promoter-TSS (NM_001359651)	-15	NR_033686	553115	Hs.470417	NM_012392	ENSG00000162517	PEF1	ABP32|PEF1A	penta-EF-hand domain containing 1	protein-coding
9_siCtrl_WDR5_peak_4032	chr12	75904810	75905866	+	1533	NA	promoter-TSS (NM_007043)	promoter-TSS (NM_007043)	51	NM_007043	11103	Hs.645517	NM_007043	ENSG00000111615	KRR1	HRB2|RIP-1	KRR1 small subunit processome component homolog	protein-coding
9_siCtrl_WDR5_peak_397	chr1	54665431	54666644	+	1532	NA	promoter-TSS (NM_001353356)	promoter-TSS (NM_001353356)	197	NM_001330602	51253	Hs.584908	NM_016491	ENSG00000116221	MRPL37	L2mt|L37mt|MRP-L2|MRP-L37|MRPL2|RPML2	mitochondrial ribosomal protein L37	protein-coding
9_siCtrl_WDR5_peak_9708	chr2	70528415	70529240	+	1530	NA	exon (NM_001329753, exon 1 of 3)	exon (NM_001329753, exon 1 of 3)	372	NM_001329752	84908	Hs.516077	NM_032822	ENSG00000035141	FAM136A	-	family with sequence similarity 136 member A	protein-coding
9_siCtrl_WDR5_peak_10528	chr2	232645556	232646607	+	1529	NA	promoter-TSS (NM_001282949)	promoter-TSS (NM_001282949)	-44	NM_001291018	5147	Hs.516808	NM_002601	ENSG00000156973	PDE6D	JBTS22|PDED	phosphodiesterase 6D	protein-coding
9_siCtrl_WDR5_peak_16287	chr7	143579070	143580167	+	1529	NA	intron (NM_001206938, intron 1 of 8)	intron (NM_001206938, intron 1 of 8)	2845	NM_001206941	9747	Hs.735149	NM_014719	ENSG00000198420	TCAF1	FAM115A	TRPM8 channel associated factor 1	protein-coding
9_siCtrl_WDR5_peak_2334	chr10	98591288	98591918	+	1529	NA	promoter-TSS (NM_001170766)	promoter-TSS (NM_001170766)	-452	NM_001346516	84458	Hs.427927	NM_015652	ENSG00000196233	LCOR	C10orf12|MLR2	ligand dependent nuclear receptor corepressor	protein-coding
9_siCtrl_WDR5_peak_17139	chr8	146175735	146176485	+	1527	NA	intron (NM_001029976, intron 1 of 3)	CpG	156	NM_001029976	7564	Hs.493225	NM_006958	ENSG00000170631	ZNF16	HZF1|KOX9	zinc finger protein 16	protein-coding
9_siCtrl_WDR5_peak_7941	chr18	5237313	5238848	+	1526	NA	promoter-TSS (NR_026849)	promoter-TSS (NR_026849)	-19	NR_015389	339290	Hs.643553	NR_015389	ENSG00000263753	LINC00667	-	long intergenic non-protein coding RNA 667	ncRNA
9_siCtrl_WDR5_peak_3047	chr11	65479286	65479983	+	1525	NA	promoter-TSS (NM_182709)	promoter-TSS (NM_182709)	-89	NM_182709	10524	Hs.397010	NM_006388	ENSG00000172977	KAT5	ESA1|HTATIP|HTATIP1|PLIP|TIP|TIP60|ZC2HC5|cPLA2	lysine acetyltransferase 5	protein-coding
9_siCtrl_WDR5_peak_2889	chr11	46401733	46403639	+	1520	NA	promoter-TSS (NM_001270552)	promoter-TSS (NM_001270552)	68	NM_001012334	4192	Hs.82045	NM_002391	ENSG00000110492	MDK	ARAP|MK|NEGF2	midkine	protein-coding
9_siCtrl_WDR5_peak_7297	chr17	43224335	43226407	+	1520	NA	5' UTR (NM_006460, exon 1 of 1)	5' UTR (NM_006460, exon 1 of 1)	687	NM_006460	10614	Hs.586945	NM_006460	ENSG00000186834	HEXIM1	CLP1|EDG1|HIS1|MAQ1	HEXIM P-TEFb complex subunit 1	protein-coding
9_siCtrl_WDR5_peak_9740	chr2	74347024	74347923	+	1517	NA	Intergenic	CpG	27566	NM_212552	388962	Hs.61472	NM_212552	ENSG00000163170	BOLA3	MMDS2	bolA family member 3	protein-coding
9_siCtrl_WDR5_peak_11263	chr21	46973406	46974787	+	1516	NA	intron (NM_001352511, intron 1 of 5)	C-rich|Low_complexity|Low_complexity	8843	NM_001352511	6573	Hs.84190	NM_003056	ENSG00000173638	SLC19A1	CHMD|FOLT|IFC-1|IFC1|REFC|RFC|RFC1	solute carrier family 19 member 1	protein-coding
9_siCtrl_WDR5_peak_3474	chr12	860289	862213	+	1516	NA	promoter-TSS (NM_001184985)	promoter-TSS (NM_001184985)	-494	NM_014823	65125	Hs.744906	NM_014823	ENSG00000060237	WNK1	HSAN2|HSN2|KDP|PPP1R167|PRKWNK1|PSK|p65	WNK lysine deficient protein kinase 1	protein-coding
9_siCtrl_WDR5_peak_15183	chr6	139094071	139095270	+	1514	NA	promoter-TSS (NM_015439)	promoter-TSS (NM_015439)	13	NM_015439	25901	Hs.412019	NM_015439	ENSG00000024862	CCDC28A	C6orf80|CCRL1AP	coiled-coil domain containing 28A	protein-coding
9_siCtrl_WDR5_peak_7234	chr17	41321704	41323529	+	1512	NA	promoter-TSS (NM_001291572)	promoter-TSS (NM_001291572)	190	NM_031862	4077	Hs.277721	NM_005899	ENSG00000188554	NBR1	1A1-3B|IAI3B|M17S2|MIG19	NBR1 autophagy cargo receptor	protein-coding
9_siCtrl_WDR5_peak_6444	chr16	28503001	28504250	+	1511	NA	promoter-TSS (NM_001286110)	promoter-TSS (NM_001286110)	-2	NM_001042432	1201	Hs.534667	NM_000086	ENSG00000188603	CLN3	BTN1|BTS|JNCL	CLN3 lysosomal/endosomal transmembrane protein, battenin	protein-coding
9_siCtrl_WDR5_peak_4007	chr12	69080433	69081198	+	1511	NA	promoter-TSS (NM_001330192)	promoter-TSS (NM_001330192)	57	NM_001330192	57122	Hs.524574	NM_020401	ENSG00000111581	NUP107	NPHS11|NUP84|ODG6|ODG6; GAMOS7	nucleoporin 107	protein-coding
9_siCtrl_WDR5_peak_18012	chrX	49047284	49048322	+	1511	NA	intron (NM_003179, intron 6 of 6)	intron (NM_003179, intron 6 of 6)	-4977	NM_006150	4007	Hs.732712	NM_006150	ENSG00000012211	PRICKLE3	LMO6|Pk3	prickle planar cell polarity protein 3	protein-coding
9_siCtrl_WDR5_peak_8114	chr18	46065529	46067293	+	1511	NA	intron (NM_001142397, intron 2 of 12)	CpG-11781	1009	NM_014772	9811	Hs.145230	NM_014772	ENSG00000134030	CTIF	Gm672|KIAA0427	cap binding complex dependent translation initiation factor	protein-coding
9_siCtrl_WDR5_peak_9038	chr19	53695911	53696679	+	1507	NA	intron (NM_001353458, intron 1 of 4)	CpG	316	NM_001353458	79788	Hs.745230	NM_024733	ENSG00000197497	ZNF665	ZFP160L	zinc finger protein 665	protein-coding
9_siCtrl_WDR5_peak_1189	chr1	169336794	169337943	+	1505	NA	promoter-TSS (NM_001320973)	promoter-TSS (NM_001320973)	-65	NM_001320973	8548	Hs.130746	NM_003666	ENSG00000117475	BLZF1	GOLGIN-45|JEM-1|JEM-1s|JEM1	basic leucine zipper nuclear factor 1	protein-coding
9_siCtrl_WDR5_peak_9787	chr2	80592812	80593371	+	1503	NA	intron (NM_001282599, intron 1 of 11)	intron (NM_001282599, intron 1 of 11)	52587	NM_001282599	1496	Hs.167368	NM_004389	ENSG00000066032	CTNNA2	CAP-R|CAPR|CDCBM9|CT114|CTNR	catenin alpha 2	protein-coding
9_siCtrl_WDR5_peak_17801	chr9	133296979	133297703	+	1502	NA	intron (NM_001291815, intron 75 of 86)	intron (NM_001291815, intron 75 of 86)	-22753	NM_000050	445	Hs.160786	NM_000050	ENSG00000130707	ASS1	ASS|CTLN1	argininosuccinate synthase 1	protein-coding
9_siCtrl_WDR5_peak_7577	chr17	61850236	61852278	+	1501	NA	promoter-TSS (NM_020198)	promoter-TSS (NM_020198)	-273	NM_203499	11325	Hs.702010	NM_007372	ENSG00000198231	DDX42	DDX42P|RHELP|RNAHP|SF3B8|SF3b125	DEAD-box helicase 42	protein-coding
9_siCtrl_WDR5_peak_17452	chr9	84210876	84211409	+	1501	NA	intron (NM_001303103, intron 14 of 19)	intron (NM_001303103, intron 14 of 19)	93308	NM_001303103	7088	Hs.197320	NM_005077	ENSG00000196781	TLE1	ESG|ESG1|GRG1	TLE family member 1, transcriptional corepressor	protein-coding
9_siCtrl_WDR5_peak_3657	chr12	28342870	28344146	+	1500	NA	non-coding (NR_148936, exon 1 of 1)	non-coding (NR_148936, exon 1 of 1)	119	NM_001352087	55297	Hs.653125	NM_018318	ENSG00000123106	CCDC91	HSD8|p56	coiled-coil domain containing 91	protein-coding
9_siCtrl_WDR5_peak_17579	chr9	100684313	100685101	+	1498	NA	exon (NM_016481, exon 1 of 5)	exon (NM_016481, exon 1 of 5)	145	NM_016481	51531	Hs.9196	NM_016481	ENSG00000136932	TRMO	C9orf156|HSPC219|NAP1	tRNA methyltransferase O	protein-coding
9_siCtrl_WDR5_peak_8572	chr19	16770636	16771182	+	1498	NA	promoter-TSS (NM_024104)	promoter-TSS (NM_024104)	46	NM_001300925	79086	Hs.356467	NM_024104	ENSG00000214046	SMIM7	C19orf42	small integral membrane protein 7	protein-coding
9_siCtrl_WDR5_peak_4268	chr12	112279452	112280846	+	1493	NA	promoter-TSS (NR_152608)	promoter-TSS (NR_152608)	117	NM_139078	8550	Hs.333120	NM_003668	ENSG00000089022	MAPKAPK5	MAPKAP-K5|MK-5|MK5|PRAK	MAPK activated protein kinase 5	protein-coding
9_siCtrl_WDR5_peak_7762	chr17	74722154	74723355	+	1489	NA	promoter-TSS (NR_038193)	promoter-TSS (NR_038193)	-66	NM_001081461	23210	Hs.514505	NM_015167	ENSG00000070495	JMJD6	PSR|PTDSR|PTDSR1	jumonji domain containing 6, arginine demethylase and lysine hydroxylase	protein-coding
9_siCtrl_WDR5_peak_6699	chr16	69795844	69796768	+	1486	NA	promoter-TSS (NM_007014)	promoter-TSS (NM_007014)	71	NM_001270454	11060	Hs.408458	NM_007014	ENSG00000198373	WWP2	AIP2|WWp2-like	WW domain containing E3 ubiquitin protein ligase 2	protein-coding
9_siCtrl_WDR5_peak_1407	chr1	205090803	205091677	+	1485	NA	promoter-TSS (NM_001193272)	promoter-TSS (NM_001193272)	-134	NM_005057	5929	Hs.519230	NM_005057	ENSG00000117222	RBBP5	RBQ3|SWD1	RB binding protein 5, histone lysine methyltransferase complex subunit	protein-coding
9_siCtrl_WDR5_peak_7333	chr17	45177221	45178080	+	1480	NA	Intergenic	CpG	-40135	NM_001363805	100506084	Hs.559259	NM_001039083	ENSG00000228696	ARL17B	ARL17|ARL17A	ADP ribosylation factor like GTPase 17B	protein-coding
9_siCtrl_WDR5_peak_16641	chr8	41400467	41401071	+	1475	NA	3' UTR (NM_032336, exon 8 of 8)	3' UTR (NM_032336, exon 8 of 8)	13989	NM_032336	84296	Hs.656996	NM_032336	ENSG00000147536	GINS4	SLD5	GINS complex subunit 4	protein-coding
9_siCtrl_WDR5_peak_13564	chr5	65018095	65019468	+	1475	NA	promoter-TSS (NM_019072)	promoter-TSS (NM_019072)	749	NM_020726	57486	Hs.247460	NM_020726	ENSG00000123213	NLN	AGTBP|EP24.16|MEP|MOP	neurolysin	protein-coding
9_siCtrl_WDR5_peak_7113	chr17	30771218	30771991	+	1472	NA	promoter-TSS (NM_001270482)	promoter-TSS (NM_001270482)	76	NM_002815	5717	Hs.443379	NM_002815	ENSG00000108671	PSMD11	Rpn6|S9|p44.5	proteasome 26S subunit, non-ATPase 11	protein-coding
9_siCtrl_WDR5_peak_11152	chr21	30396778	30397522	+	1472	NA	intron (NM_001001992, intron 1 of 17)	CpG	161	NM_006447	10600	Hs.99819	NM_006447	ENSG00000156256	USP16	UBP-M|UBPM	ubiquitin specific peptidase 16	protein-coding
9_siCtrl_WDR5_peak_7125	chr17	33446245	33447203	+	1471	NA	promoter-TSS (NR_037712)	promoter-TSS (NR_037712)	53	NR_037711	5892	Hs.631757	NM_002878	ENSG00000185379	RAD51D	BROVCA4|R51H3|RAD51L3|TRAD	RAD51 paralog D	protein-coding
9_siCtrl_WDR5_peak_8373	chr19	4968466	4969317	+	1470	NA	promoter-TSS (NM_015015)	promoter-TSS (NM_015015)	-233	NM_001370093	23030	Hs.654816	NM_015015	ENSG00000127663	KDM4B	JMJD2B|TDRD14B	lysine demethylase 4B	protein-coding
9_siCtrl_WDR5_peak_7505	chr17	56429143	56430106	+	1467	NA	promoter-TSS (NR_073470)	promoter-TSS (NR_073470)	-62	NM_003168	6827	Hs.439481	NM_003168	ENSG00000213246	SUPT4H1	SPT4|SPT4H|SUPT4H|Supt4a	SPT4 homolog, DSIF elongation factor subunit	protein-coding
9_siCtrl_WDR5_peak_7246	chr17	41533832	41534546	+	1466	NA	Intergenic	Intergenic	12015	NR_031751	100313779		NR_031751	ENSG00000284344	MIR2117	-	microRNA 2117	ncRNA
9_siCtrl_WDR5_peak_10459	chr2	219260726	219261680	+	1465	NA	3' UTR (NM_000578, exon 15 of 15)	3' UTR (NM_000578, exon 15 of 15)	-1753	NM_001206878	58190	Hs.444468	NM_021198	ENSG00000144579	CTDSP1	NIF3|NLI-IF|NLIIF|SCP1	CTD small phosphatase 1	protein-coding
9_siCtrl_WDR5_peak_11360	chr22	24255449	24256973	+	1465	NA	Intergenic	CpG	-15094	NR_038911	284889	Hs.632772	NR_038911		MIF-AS1	MIF-AS	MIF antisense RNA 1	ncRNA
9_siCtrl_WDR5_peak_16876	chr8	95565261	95566159	+	1464	NA	promoter-TSS (NM_015496)	promoter-TSS (NM_015496)	-13	NM_015496	25962	Hs.202238	NM_015496	ENSG00000164944	VIRMA	KIAA1429|MSTP054|fSAP121	vir like m6A methyltransferase associated	protein-coding
9_siCtrl_WDR5_peak_7307	chr17	43697132	43698692	+	1463	NA	promoter-TSS (NR_027295)	promoter-TSS (NR_027295)	-69	NR_027295	147081	Hs.128813	NM_152466	ENSG00000204650	LINC02210	C17orf69|CRHR1-IT1	long intergenic non-protein coding RNA 2210	ncRNA
9_siCtrl_WDR5_peak_11865	chr3	47844087	47845281	+	1461	NA	promoter-TSS (NM_138615)	promoter-TSS (NM_138615)	56	NM_138615	22907	Hs.517948	NM_014966	ENSG00000132153	DHX30	DDX30|NEDMIAL|RETCOR	DExH-box helicase 30	protein-coding
9_siCtrl_WDR5_peak_8822	chr19	41082437	41083305	+	1459	NA	promoter-TSS (NM_138392)	promoter-TSS (NM_138392)	92	NM_138392	92799	Hs.26506	NM_138392	ENSG00000160410	SHKBP1	PP203|Sb1	SH3KBP1 binding protein 1	protein-coding
9_siCtrl_WDR5_peak_4897	chr13	112225144	112226030	+	1459	NA	Intergenic	Intergenic	-22769	NR_135814	105370369		NR_135814	ENSG00000215881	LINC02337	-	long intergenic non-protein coding RNA 2337	ncRNA
9_siCtrl_WDR5_peak_4228	chr12	109535299	109536276	+	1458	NA	promoter-TSS (NM_003362)	promoter-TSS (NM_003362)	-190	NM_003362	7374	Hs.191334	NM_003362	ENSG00000076248	UNG	DGU|HIGM4|HIGM5|UDG|UNG1|UNG15|UNG2	uracil DNA glycosylase	protein-coding
9_siCtrl_WDR5_peak_12156	chr3	114864928	114867207	+	1458	NA	promoter-TSS (NM_001348800)	promoter-TSS (NM_001348800)	68	NM_001348803	26137	Hs.202577	NM_015642	ENSG00000181722	ZBTB20	DPZF|HOF|ODA-8S|PRIMS|ZNF288	zinc finger and BTB domain containing 20	protein-coding
9_siCtrl_WDR5_peak_16499	chr8	22461783	22462808	+	1453	NA	promoter-TSS (NM_001363069)	promoter-TSS (NM_001363069)	25	NR_033902	57805	Hs.744848	NM_021174	ENSG00000158941	CCAR2	DBC-1|DBC1|KIAA1967|NET35|p30 DBC|p30DBC	cell cycle and apoptosis regulator 2	protein-coding
9_siCtrl_WDR5_peak_12075	chr3	88107255	88108867	+	1451	NA	promoter-TSS (NM_001350134)	promoter-TSS (NM_001350134)	85	NM_003663	8545	Hs.444818	NM_003663	ENSG00000163320	CGGBP1	CGGBP|p20-CGGBP	CGG triplet repeat binding protein 1	protein-coding
9_siCtrl_WDR5_peak_10717	chr20	18547063	18548479	+	1450	NA	promoter-TSS (NM_001348957)	promoter-TSS (NM_001348957)	-293	NM_001348957	388789	Hs.349092	NM_001348957	ENSG00000232388	SMIM26	LINC00493	small integral membrane protein 26	protein-coding
9_siCtrl_WDR5_peak_2525	chr10	121137007	121137803	+	1449	NA	promoter-TSS (NR_039829)	promoter-TSS (NR_039829)	-79	NR_039829	100616398		NR_039829	ENSG00000265719	MIR4681	-	microRNA 4681	ncRNA
9_siCtrl_WDR5_peak_8054	chr18	32869772	32871237	+	1447	NA	promoter-TSS (NM_001288711)	promoter-TSS (NM_001288711)	268	NR_024566	10778	Hs.314246	NM_006629	ENSG00000257267	ZNF271P	CT-ZFP48|HZF7|ZNF-EB|ZNF-dp|ZNF271|ZNFEB	zinc finger protein 271, pseudogene	pseudo
9_siCtrl_WDR5_peak_6716	chr16	71842462	71843088	+	1443	NA	promoter-TSS (NM_001030007)	promoter-TSS (NM_001030007)	-38	NM_001030007	164	Hs.461253	NM_001128	ENSG00000166747	AP1G1	ADTG|CLAPG1	adaptor related protein complex 1 subunit gamma 1	protein-coding
9_siCtrl_WDR5_peak_17728	chr9	128508190	128509201	+	1443	NA	promoter-TSS (NM_001330782)	promoter-TSS (NM_001330782)	-487	NR_122032	51145	Hs.104671	NM_016158		LOC51145	-	uncharacterized LOC51145	ncRNA
9_siCtrl_WDR5_peak_6488	chr16	30204689	30205647	+	1442	NA	promoter-TSS (NM_178044)	promoter-TSS (NM_178044)	4	NM_178044	79008	Hs.728161	NM_024044	ENSG00000181625	SLX1B	GIYD2	SLX1 homolog B, structure-specific endonuclease subunit	protein-coding
9_siCtrl_WDR5_peak_12421	chr3	169072426	169072965	+	1440	NA	intron (NM_001205194, intron 1 of 15)	intron (NM_001205194, intron 1 of 15)	-92960	NR_134932	105374205		NR_134932	ENSG00000241479	LOC105374205	-	uncharacterized LOC105374205	ncRNA
9_siCtrl_WDR5_peak_8220	chr18	67872512	67873964	+	1439	NA	promoter-TSS (NM_173630)	promoter-TSS (NM_173630)	-315	NM_001318520	25914	Hs.654809	NM_173630	ENSG00000176225	RTTN	MSSP	rotatin	protein-coding
9_siCtrl_WDR5_peak_13465	chr5	36241919	36243040	+	1437	NA	promoter-TSS (NM_001287341)	promoter-TSS (NM_001287341)	-98	NM_153013	133686	Hs.81907	NM_153013	ENSG00000152620	NADK2	C5orf33|DECRD|MNADK|NADKD1	NAD kinase 2, mitochondrial	protein-coding
9_siCtrl_WDR5_peak_8438	chr19	9945482	9946498	+	1436	NA	promoter-TSS (NR_038830)	promoter-TSS (NR_038830)	-4	NR_038830	5300	Hs.465849	NM_006221	ENSG00000127445	PIN1	DOD|UBL5	peptidylprolyl cis/trans isomerase, NIMA-interacting 1	protein-coding
9_siCtrl_WDR5_peak_13878	chr5	132386888	132388839	+	1436	NA	5' UTR (NM_002154, exon 1 of 19)	5' UTR (NM_002154, exon 1 of 19)	158	NM_002154	3308	Hs.90093	NM_002154	ENSG00000170606	HSPA4	APG-2|HEL-S-5a|HS24/P52|HSPH2|RY|hsp70|hsp70RY	heat shock protein family A (Hsp70) member 4	protein-coding
9_siCtrl_WDR5_peak_5895	chr15	74392209	74392942	+	1432	NA	promoter-TSS (NR_160652)	promoter-TSS (NR_160652)	-28	NR_160652	732265		NR_160652		LOC732265	-	COMM domain containing 4 pseudogene	pseudo
9_siCtrl_WDR5_peak_9111	chr19	57998773	57999430	+	1431	NA	promoter-TSS (NM_001291744)	promoter-TSS (NM_001291744)	-17	NM_001098494	79744	Hs.744339	NM_024691	ENSG00000105136	ZNF419	ZAPHIR|ZNF419A	zinc finger protein 419	protein-coding
9_siCtrl_WDR5_peak_4397	chr12	124086068	124087149	+	1430	NA	promoter-TSS (NM_020936)	promoter-TSS (NM_020936)	-38	NR_135105	57696	Hs.286173	NM_020936	ENSG00000111364	DDX55	-	DEAD-box helicase 55	protein-coding
9_siCtrl_WDR5_peak_16206	chr7	132766155	132767192	+	1426	NA	exon (NM_017812, exon 1 of 8)	exon (NM_017812, exon 1 of 8)	177	NM_017812	54927	Hs.655010	NM_017812	ENSG00000106554	CHCHD3	MICOS19|MINOS3|Mic19|PPP1R22	coiled-coil-helix-coiled-coil-helix domain containing 3	protein-coding
9_siCtrl_WDR5_peak_1373	chr1	202310013	202311340	+	1425	NA	intron (NM_001310326, intron 1 of 6)	AluYa5|SINE|Alu	388	NM_014176	29089	Hs.5199	NM_014176	ENSG00000077152	UBE2T	FANCT|HSPC150|PIG50	ubiquitin conjugating enzyme E2 T	protein-coding
9_siCtrl_WDR5_peak_5011	chr14	35590728	35592148	+	1425	NA	promoter-TSS (NM_014672)	promoter-TSS (NM_014672)	310	NM_017917	55012	Hs.530712	NM_017917	ENSG00000092020	PPP2R3C	C14orf10|G4-1|G5pr|GDRM|SPGF36	protein phosphatase 2 regulatory subunit B''gamma	protein-coding
9_siCtrl_WDR5_peak_2833	chr11	35639024	35640185	+	1425	NA	promoter-TSS (NM_014344)	promoter-TSS (NM_014344)	-404	NM_014344	24147	Hs.39384	NM_014344	ENSG00000179431	FJX1	-	four-jointed box kinase 1	protein-coding
9_siCtrl_WDR5_peak_14541	chr6	30524599	30525612	+	1421	NA	5' UTR (NM_005275, exon 1 of 12).6	5' UTR (NM_005275, exon 1 of 12).6	266	NM_005275	2794	Hs.83147	NM_005275	ENSG00000204590	GNL1	HSR1	G protein nucleolar 1 (putative)	protein-coding
9_siCtrl_WDR5_peak_9421	chr2	32502653	32503577	+	1421	NA	5' UTR (NM_032312, exon 1 of 6)	5' UTR (NM_032312, exon 1 of 6)	142	NM_032312	84272	Hs.468099	NM_032312	ENSG00000119820	YIPF4	FinGER4|Nbla11189	Yip1 domain family member 4	protein-coding
9_siCtrl_WDR5_peak_16692	chr8	57123613	57124624	+	1420	NA	promoter-TSS (NM_001011671)	promoter-TSS (NM_001011671)	-79	NM_001317858	79145	Hs.436913	NM_024300	ENSG00000170791	CHCHD7	COX23	coiled-coil-helix-coiled-coil-helix domain containing 7	protein-coding
9_siCtrl_WDR5_peak_8335	chr19	3185089	3186166	+	1420	NA	promoter-TSS (NM_001321463)	promoter-TSS (NM_001321463)	-301	NM_001321463	56926	Hs.657032	NM_020170	ENSG00000125912	NCLN	NET59	nicalin	protein-coding
9_siCtrl_WDR5_peak_6247	chr16	2731776	2732909	+	1418	NA	promoter-TSS (NM_018992)	promoter-TSS (NM_018992)	-182	NM_018992	54442	Hs.61960	NM_018992	ENSG00000167977	KCTD5	-	potassium channel tetramerization domain containing 5	protein-coding
9_siCtrl_WDR5_peak_10794	chr20	30697083	30697862	+	1417	NA	promoter-TSS (NM_001363731)	promoter-TSS (NM_001363731)	-45	NM_014742	9777	Hs.654665	NM_014742	ENSG00000101337	TM9SF4	dJ836N17.2	transmembrane 9 superfamily member 4	protein-coding
9_siCtrl_WDR5_peak_16258	chr7	139043787	139045664	+	1414	NA	promoter-TSS (NM_016019)	promoter-TSS (NM_016019)	85	NM_016019	51631	Hs.731488	NM_016019	ENSG00000146963	LUC7L2	CGI-59|CGI-74|LUC7B2	LUC7 like 2, pre-mRNA splicing factor	protein-coding
9_siCtrl_WDR5_peak_11133	chr21	27106778	27108852	+	1414	NA	5' UTR (NM_001003701, exon 1 of 4)	intron (NM_001197297, intron 1 of 9)	150	NM_001003703	522	Hs.246310	NM_001685	ENSG00000154723	ATP5PF	ATP5|ATP5A|ATP5J|ATPM|CF6|F6	ATP synthase peripheral stalk subunit F6	protein-coding
9_siCtrl_WDR5_peak_6530	chr16	31469810	31471084	+	1414	NA	5' UTR (NM_001105247, exon 1 of 6)	5' UTR (NM_001105247, exon 1 of 6)	130	NM_024742	79798	Hs.732945	NM_024742	ENSG00000140691	ARMC5	AIMAH2	armadillo repeat containing 5	protein-coding
9_siCtrl_WDR5_peak_416	chr1	55680180	55682091	+	1406	NA	promoter-TSS (NR_038320)	promoter-TSS (NR_038320)	54	NR_038320	100507634	Hs.735428	NR_038320		LOC100507634	-	uncharacterized LOC100507634	ncRNA
9_siCtrl_WDR5_peak_15430	chr7	4814706	4815620	+	1404	NA	promoter-TSS (NM_001364858)	promoter-TSS (NM_001364858)	-91	NR_157345	9907	Hs.558440	NM_014855	ENSG00000242802	AP5Z1	KIAA0415|SPG48|zeta	adaptor related protein complex 5 subunit zeta 1	protein-coding
9_siCtrl_WDR5_peak_10841	chr20	34329233	34330897	+	1404	NA	non-coding (NR_040724, exon 1 of 18)	non-coding (NR_040724, exon 1 of 18)	117	NM_001323423	9584	Hs.282901	NM_004902	ENSG00000131051	RBM39	CAPER|CAPERalpha|FSAP59|HCC1|RNPC2	RNA binding motif protein 39	protein-coding
9_siCtrl_WDR5_peak_15376	chr6	170238533	170239095	+	1403	NA	Intergenic	Intergenic	-39893	NR_026781	401288	Hs.556095	NM_207502	ENSG00000229214	LINC00242	C6orf122|NCRNA00242|dJ266L20.5	long intergenic non-protein coding RNA 242	ncRNA
9_siCtrl_WDR5_peak_10887	chr20	40321339	40322388	+	1401	NA	Intergenic	CpG	-74847	NM_032221	84181	Hs.740645	NM_032221	ENSG00000124177	CHD6	CHD-6|CHD5|RIGB	chromodomain helicase DNA binding protein 6	protein-coding
9_siCtrl_WDR5_peak_7466	chr17	55441276	55442213	+	1400	NA	intron (NM_001322250, intron 5 of 13)	intron (NM_001322250, intron 5 of 13)	107364	NM_170721	124540	Hs.658922	NM_138962	ENSG00000153944	MSI2	MSI2H	musashi RNA binding protein 2	protein-coding
9_siCtrl_WDR5_peak_330	chr1	46907946	46908550	+	1396	NA	intron (NR_045483, intron 7 of 8)	MIRb|SINE|MIR	7128	NR_121680	101929651	Hs.638707	NR_121680	ENSG00000224863	LINC01398	-	long intergenic non-protein coding RNA 1398	ncRNA
9_siCtrl_WDR5_peak_760	chr1	109234372	109236306	+	1396	NA	exon (NM_018061, exon 1 of 6)	exon (NM_018061, exon 1 of 6)	407	NM_001349765	55119	Hs.342307	NM_018061	ENSG00000134186	PRPF38B	NET1	pre-mRNA processing factor 38B	protein-coding
9_siCtrl_WDR5_peak_6187	chr16	577013	577858	+	1395	NA	promoter-TSS (NR_024121)	promoter-TSS (NR_024121)	-28	NR_024121	64493	Hs.721553	NR_024121		LINC00235	C16orf10|LA16c-356B8.1|NCRNA00235	long intergenic non-protein coding RNA 235	ncRNA
9_siCtrl_WDR5_peak_10854	chr20	35806924	35808249	+	1394	NA	promoter-TSS (NM_001324303)	promoter-TSS (NM_001324303)	137	NM_001324305	6185	Hs.370895	NM_002951	ENSG00000118705	RPN2	RIBIIR|RPN-II|RPNII|SWP1	ribophorin II	protein-coding
9_siCtrl_WDR5_peak_2097	chr10	51827071	51828044	+	1393	NA	promoter-TSS (NR_038275)	promoter-TSS (NR_038275)	6	NR_038275	100421577	Hs.712902	NR_038275	ENSG00000235618	FAM21EP	-	family with sequence similarity 21, member A pseudogene	pseudo
9_siCtrl_WDR5_peak_9049	chr19	54618498	54619394	+	1392	NA	promoter-TSS (NM_015629)	promoter-TSS (NM_015629)	109	NM_013342	29844	Hs.590939	NM_013342	ENSG00000105619	TFPT	FB1|INO80F|amida	TCF3 fusion partner	protein-coding
9_siCtrl_WDR5_peak_14643	chr6	36842214	36842908	+	1391	NA	promoter-TSS (NM_016059)	promoter-TSS (NM_016059)	18	NM_016059	51645	Hs.27693	NM_016059	ENSG00000137168	PPIL1	CGI-124|CYPL1|PPIase|hCyPX	peptidylprolyl isomerase like 1	protein-coding
9_siCtrl_WDR5_peak_8188	chr18	57567296	57568492	+	1390	NA	intron (NM_021127, intron 1 of 1)	intron (NM_021127, intron 1 of 1)	666	NM_021127	5366	Hs.96	NM_021127	ENSG00000141682	PMAIP1	APR|NOXA	phorbol-12-myristate-13-acetate-induced protein 1	protein-coding
9_siCtrl_WDR5_peak_7170	chr17	37356061	37357204	+	1390	NA	promoter-TSS (NM_001330200)	promoter-TSS (NM_001330200)	56	NM_001330200	6143	Hs.381061	NM_000981	ENSG00000108298	RPL19	L19	ribosomal protein L19	protein-coding
9_siCtrl_WDR5_peak_5026	chr14	45604822	45605612	+	1389	NA	promoter-TSS (NM_020937)	promoter-TSS (NM_020937)	75	NM_001308134	57697	Hs.509229	NM_020937	ENSG00000187790	FANCM	FAAP250|KIAA1596|POF15|SPGF28	FA complementation group M	protein-coding
9_siCtrl_WDR5_peak_1590	chr1	221631414	221632132	+	1388	NA	Intergenic	Intergenic	-122135	NR_024236	400804	Hs.722626	NR_024236	ENSG00000234754	C1orf140	-	uncharacterized LOC400804	ncRNA
9_siCtrl_WDR5_peak_8531	chr19	13905696	13906603	+	1387	NA	promoter-TSS (NM_001367834)	promoter-TSS (NM_001367834)	-108	NM_001367834	65249	Hs.466015	NM_023072	ENSG00000132003	ZSWIM4	-	zinc finger SWIM-type containing 4	protein-coding
9_siCtrl_WDR5_peak_305	chr1	44435287	44435986	+	1383	NA	promoter-TSS (NM_001384)	promoter-TSS (NM_001384)	-46	NM_001319166	1802	Hs.632398	NM_001384	ENSG00000132768	DPH2	DPH2L2	diphthamide biosynthesis 2	protein-coding
9_siCtrl_WDR5_peak_4340	chr12	120638271	120639508	+	1382	NA	promoter-TSS (NR_038924)	promoter-TSS (NR_038924)	25	NM_001002	6175	Hs.546285	NM_001002	ENSG00000089157	RPLP0	L10E|LP0|P0|PRLP0|RPP0	ribosomal protein lateral stalk subunit P0	protein-coding
9_siCtrl_WDR5_peak_7830	chr17	78388725	78389332	+	1379	NA	promoter-TSS (NM_001164638)	promoter-TSS (NM_001164638)	-60	NR_029376	100294362	Hs.657519	NR_029376	ENSG00000263069	LOC100294362	-	uncharacterized LOC100294362	ncRNA
9_siCtrl_WDR5_peak_9842	chr2	88990391	88991939	+	1377	NA	promoter-TSS (NM_144563)	promoter-TSS (NM_144563)	-26	NM_144563	22934	Hs.469264	NM_144563	ENSG00000153574	RPIA	RPI|RPIAD	ribose 5-phosphate isomerase A	protein-coding
9_siCtrl_WDR5_peak_6454	chr16	28985171	28986466	+	1377	NA	promoter-TSS (NM_001142448)	promoter-TSS (NM_001142448)	-281	NM_001142449	83985	Hs.617449	NM_032038	ENSG00000169682	SPNS1	HSpin1|LAT|PP2030|SLC62A1|SPIN1|SPINL|nrs	sphingolipid transporter 1 (putative)	protein-coding
9_siCtrl_WDR5_peak_2147	chr10	69523245	69524218	+	1376	NA	Intergenic	Intergenic	-67778	NM_013266	29119	Hs.21375	NM_013266	ENSG00000183230	CTNNA3	ARVD13|VR22	catenin alpha 3	protein-coding
9_siCtrl_WDR5_peak_5969	chr15	79164770	79166315	+	1375	NA	5' UTR (NM_001265604, exon 1 of 12)	intron (NM_206839, intron 1 of 12)	211	NM_001265605	10933	Hs.374503	NM_006791	ENSG00000185787	MORF4L1	Eaf3|FWP006|HsT17725|MEAF3|MORFRG15|MRG15|S863-6	mortality factor 4 like 1	protein-coding
9_siCtrl_WDR5_peak_8728	chr19	36208110	36208869	+	1374	NA	promoter-TSS (NM_014727)	promoter-TSS (NM_014727)	-432	NM_014727	9757	Hs.92236	NM_014727	ENSG00000272333	KMT2B	CXXC10|DYT28|HRX2|MLL1B|MLL2|MLL4|TRX2|WBP-7|WBP7	lysine methyltransferase 2B	protein-coding
9_siCtrl_WDR5_peak_4359	chr12	121789744	121790655	+	1372	NA	promoter-TSS (NM_001330489)	promoter-TSS (NM_001330489)	15	NM_001330489	51433	Hs.7101	NM_016237	ENSG00000089053	ANAPC5	APC5	anaphase promoting complex subunit 5	protein-coding
9_siCtrl_WDR5_peak_3007	chr11	64036993	64038091	+	1372	NA	TTS (NM_000932)	TTS (NM_000932)	-14269	NM_001170726	56834	Hs.523763	NM_020155	ENSG00000173264	GPR137	C11orf4|GPR137A|TM7SF1L1	G protein-coupled receptor 137	protein-coding
9_siCtrl_WDR5_peak_4270	chr12	112545892	112546647	+	1371	NA	intron (NM_024953, intron 1 of 23)	CpG	318	NM_024953	80018	Hs.530941	NM_024953	ENSG00000111300	NAA25	C12orf30|MDM20|NAP1	N(alpha)-acetyltransferase 25, NatB auxiliary subunit	protein-coding
9_siCtrl_WDR5_peak_8352	chr19	4182179	4182725	+	1370	NA	promoter-TSS (NM_133475)	promoter-TSS (NM_133475)	108	NM_001321059	51548	Hs.423756	NM_016539	ENSG00000077463	SIRT6	SIR2L6	sirtuin 6	protein-coding
9_siCtrl_WDR5_peak_13635	chr5	73351269	73351881	+	1367	NA	Intergenic	Intergenic	242204	NM_001244364	64283	Hs.482521	NM_001080479	ENSG00000214944	ARHGEF28	RGNEF|RIP2|p190RHOGEF	Rho guanine nucleotide exchange factor 28	protein-coding
9_siCtrl_WDR5_peak_2849	chr11	36615729	36616483	+	1366	NA	promoter-TSS (NM_001276727)	promoter-TSS (NM_001276727)	63	NM_001276726	119710	Hs.159376	NM_138787	ENSG00000166352	C11orf74	HEPIS|NWC	chromosome 11 open reading frame 74	protein-coding
9_siCtrl_WDR5_peak_8829	chr19	41256032	41257876	+	1365	NA	promoter-TSS (NM_001353807)	promoter-TSS (NM_001353807)	-154	NM_004596	6626	Hs.466775	NM_004596	ENSG00000077312	SNRPA	Mud1|U1-A|U1A	small nuclear ribonucleoprotein polypeptide A	protein-coding
9_siCtrl_WDR5_peak_7225	chr17	40925168	40926015	+	1364	NA	intron (NM_032353, intron 1 of 5)	intron (NM_032353, intron 1 of 5)	124	NM_032353	84313	Hs.500165	NM_032353	ENSG00000131475	VPS25	DERP9|EAP20|FAP20	vacuolar protein sorting 25 homolog	protein-coding
9_siCtrl_WDR5_peak_4788	chr13	79861909	79862513	+	1363	NA	Intergenic	Intergenic	118145	NM_001286631	64062	Hs.558528	NM_018605	ENSG00000139746	RBM26	ARRS2|C13orf10|PPP1R132|PRO1777|SE70-2|ZC3H17	RNA binding motif protein 26	protein-coding
9_siCtrl_WDR5_peak_17498	chr9	91932937	91933722	+	1361	NA	promoter-TSS (NM_001354702)	promoter-TSS (NM_001354702)	-86	NM_001354702	79048	Hs.59804	NM_024077	ENSG00000187742	SECISBP2	SBP2	SECIS binding protein 2	protein-coding
9_siCtrl_WDR5_peak_946	chr1	150207875	150209060	+	1358	NA	promoter-TSS (NM_001280559)	promoter-TSS (NM_001280559)	-7	NM_001280560	81611	Hs.656466	NM_030920	ENSG00000143401	ANP32E	LANP-L|LANPL	acidic nuclear phosphoprotein 32 family member E	protein-coding
9_siCtrl_WDR5_peak_8970	chr19	49479333	49479866	+	1356	NA	intron (NR_027763, intron 9 of 14)	intron (NR_027763, intron 9 of 14)	11033	NM_000146	2512	Hs.433670	NM_000146	ENSG00000087086	FTL	LFTD|NBIA3	ferritin light chain	protein-coding
9_siCtrl_WDR5_peak_14106	chr5	167622307	167622989	+	1356	NA	intron (NM_001368145, intron 14 of 26)	intron (NM_001368145, intron 14 of 26)	29798	NR_162139	113219458		NR_162139		MIR12125	-	microRNA 12125	ncRNA
9_siCtrl_WDR5_peak_7287	chr17	43024152	43025324	+	1355	NA	intron (NM_001264573, intron 1 of 14)	CpG	403	NM_001265577	146909	Hs.135094	NM_001080443	ENSG00000186185	KIF18B	-	kinesin family member 18B	protein-coding
9_siCtrl_WDR5_peak_6578	chr16	50775302	50776447	+	1355	NA	promoter-TSS (NM_001042412)	promoter-TSS (NM_001042412)	-87	NM_015247	1540	Hs.578973	NM_015247	ENSG00000083799	CYLD	BRSS|CDMT|CYLD1|CYLDI|EAC|MFT|MFT1|SBS|TEM|USPL2	CYLD lysine 63 deubiquitinase	protein-coding
9_siCtrl_WDR5_peak_1352	chr1	200708092	200709505	+	1354	NA	promoter-TSS (NM_001297707)	promoter-TSS (NM_001297707)	98	NM_001297707	23271	Hs.23585	NM_203459	ENSG00000118200	CAMSAP2	CAMSAP1L1	calmodulin regulated spectrin associated protein family member 2	protein-coding
9_siCtrl_WDR5_peak_6851	chr17	3539323	3540338	+	1354	NA	promoter-TSS (NM_004937)	promoter-TSS (NM_004937)	68	NM_001031681	1497	Hs.187667	NM_004937	ENSG00000040531	CTNS	CTNS-LSB|PQLC4|SLC66A4	cystinosin, lysosomal cystine transporter	protein-coding
9_siCtrl_WDR5_peak_7980	chr18	12948010	12949131	+	1354	NA	intron (NM_001013437, intron 1 of 8)	CpG	560	NM_001013437	81929	Hs.301048	NM_031216	ENSG00000085415	SEH1L	SEC13L|SEH1A|SEH1B|Seh1	SEH1 like nucleoporin	protein-coding
9_siCtrl_WDR5_peak_6583	chr16	51973193	51973933	+	1351	NA	Intergenic	Intergenic	134284	NM_001242473	388276	Hs.534669	NM_001242473		C16orf97	-	chromosome 16 open reading frame 97	protein-coding
9_siCtrl_WDR5_peak_7247	chr17	41545093	41546267	+	1351	NA	Intergenic	Intergenic	-15553	NR_136226	1659	Hs.463105	NM_004941	ENSG00000067596	DHX8	DDX8|Dhr2|HRH1|PRP22|PRPF22	DEAH-box helicase 8	protein-coding
9_siCtrl_WDR5_peak_11418	chr22	31364281	31365978	+	1350	NA	promoter-TSS (NR_152868)	promoter-TSS (NR_152868)	-68	NR_110492	55000	Hs.554829	NR_002323	ENSG00000253352	TUG1	LINC00080|NCRNA00080|TI-227H	taurine up-regulated 1	ncRNA
9_siCtrl_WDR5_peak_1927	chr10	17243073	17243995	+	1350	NA	intron (NM_004412, intron 1 of 10)	CpG	137	NM_001351219	1787	Hs.351665	NM_004412	ENSG00000107614	TRDMT1	DMNT2|DNMT2|MHSAIIP|PUMET|RNMT1	tRNA aspartic acid methyltransferase 1	protein-coding
9_siCtrl_WDR5_peak_7295	chr17	43138139	43139134	+	1348	NA	promoter-TSS (NM_001288654)	promoter-TSS (NM_001288654)	-49	NM_021079	4836	Hs.532790	NM_021079	ENSG00000136448	NMT1	NMT	N-myristoyltransferase 1	protein-coding
9_siCtrl_WDR5_peak_8232	chr18	71815167	71816331	+	1348	NA	promoter-TSS (NM_152676)	promoter-TSS (NM_152676)	-9	NM_014177	29090	Hs.532835	NM_014177	ENSG00000075336	TIMM21	C18orf55|HSPC154|TIM21	translocase of inner mitochondrial membrane 21	protein-coding
9_siCtrl_WDR5_peak_9287	chr2	19271594	19272566	+	1347	NA	Intergenic	Intergenic	-45354	NR_135287	400945	Hs.502854	NR_135287	ENSG00000236204	LINC01376	-	long intergenic non-protein coding RNA 1376	ncRNA
9_siCtrl_WDR5_peak_12464	chr3	179322012	179322943	+	1346	NA	promoter-TSS (NM_020409)	promoter-TSS (NM_020409)	-43	NM_177988	57129	Hs.283734	NM_020409	ENSG00000136522	MRPL47	CGI-204|L47mt|MRP-L47|NCM1	mitochondrial ribosomal protein L47	protein-coding
9_siCtrl_WDR5_peak_12345	chr3	148803540	148804785	+	1344	NA	promoter-TSS (NR_046648)	promoter-TSS (NR_046648)	43	NR_046648	100873945	Hs.742423	NR_046648	ENSG00000239718	HLTF-AS1	-	HLTF antisense RNA 1	ncRNA
9_siCtrl_WDR5_peak_6911	chr17	7475425	7476600	+	1340	NA	promoter-TSS (NM_001416)	promoter-TSS (NM_001416)	-131	NM_001416	1973	Hs.129673	NM_001416	ENSG00000161960	EIF4A1	DDX2A|EIF-4A|EIF4A|eIF-4A-I|eIF4A-I	eukaryotic translation initiation factor 4A1	protein-coding
9_siCtrl_WDR5_peak_863	chr1	118323547	118324243	+	1339	NA	Intergenic	Intergenic	148349	NM_017686	54834	Hs.310809	NM_017686	ENSG00000196505	GDAP2	MACROD3|SCAR27	ganglioside induced differentiation associated protein 2	protein-coding
9_siCtrl_WDR5_peak_2954	chr11	61559685	61561261	+	1339	NA	promoter-TSS (NM_014206)	promoter-TSS (NM_014206)	90	NM_004111	2237	Hs.409065	NM_004111	ENSG00000168496	FEN1	FEN-1|MF1|RAD2	flap structure-specific endonuclease 1	protein-coding
9_siCtrl_WDR5_peak_726	chr1	99744953	99745773	+	1338	NA	intron (NM_014839, intron 1 of 6)	intron (NM_014839, intron 1 of 6)	15515	NM_001166252	9890	Hs.13245	NM_014839	ENSG00000117600	PLPPR4	LPPR4|LPR4|PHP1|PRG-1|PRG1	phospholipid phosphatase related 4	protein-coding
9_siCtrl_WDR5_peak_7298	chr17	43238286	43239433	+	1338	NA	promoter-TSS (NM_001303442)	promoter-TSS (NM_001303442)	-353	NM_001303440	124790	Hs.56382	NM_144608	ENSG00000168517	HEXIM2	L3	HEXIM P-TEFb complex subunit 2	protein-coding
9_siCtrl_WDR5_peak_11635	chr3	3220743	3221846	+	1338	NA	intron (NM_016302, intron 1 of 10)	CpG	107	NM_016302	51185	Hs.18925	NM_016302	ENSG00000113851	CRBN	MRT2|MRT2A	cereblon	protein-coding
9_siCtrl_WDR5_peak_1073	chr1	156697816	156698867	+	1335	NA	promoter-TSS (NM_001303095)	promoter-TSS (NM_001303095)	80	NM_015997	51093	Hs.512597	NM_015997	ENSG00000143303	RRNAD1	C1orf66|CGI-41|METTL25B	ribosomal RNA adenine dimethylase domain containing 1	protein-coding
9_siCtrl_WDR5_peak_7770	chr17	75368792	75370055	+	1334	NA	promoter-TSS (NM_001113493)	promoter-TSS (NM_001113493)	4	NM_001113493	10801	Hs.440932	NM_006640	ENSG00000184640	SEPTIN9	AF17q25|MSF|MSF1|NAPB|PNUTL4|SEPT9|SINT1|SeptD1	septin 9	protein-coding
9_siCtrl_WDR5_peak_5196	chr14	74550780	74552197	+	1333	NA	promoter-TSS (NM_001024674)	promoter-TSS (NM_001024674)	-168	NM_001024674	91750	Hs.612866	NM_001024674	ENSG00000205659	LIN52	C14orf46|c14_5549	lin-52 DREAM MuvB core complex component	protein-coding
9_siCtrl_WDR5_peak_14860	chr6	84936998	84937853	+	1333	NA	promoter-TSS (NM_014895)	promoter-TSS (NM_014895)	-64	NM_001286206	22832	Hs.485865	NM_014895	ENSG00000135315	CEP162	C6orf84|KIAA1009|QN1	centrosomal protein 162	protein-coding
9_siCtrl_WDR5_peak_1078	chr1	156736697	156737955	+	1331	NA	promoter-TSS (NM_005973)	promoter-TSS (NM_005973)	-1	NM_005973	5546	Hs.516948	NM_005973	ENSG00000143294	PRCC	RCCP1|TPRC	proline rich mitotic checkpoint control factor	protein-coding
9_siCtrl_WDR5_peak_8499	chr19	12661681	12662872	+	1328	NA	promoter-TSS (NM_144976)	promoter-TSS (NM_144976)	20	NM_144976	163050	Hs.655615	NM_144976	ENSG00000249709	ZNF564	-	zinc finger protein 564	protein-coding
9_siCtrl_WDR5_peak_5783	chr15	65809303	65810234	+	1325	NA	promoter-TSS (NR_135486)	promoter-TSS (NR_135486)	-156	NM_197960	54878	Hs.458609	NM_017743	ENSG00000074603	DPP8	DP8|DPRP-1|DPRP1|MST097|MSTP097|MSTP135|MSTP141	dipeptidyl peptidase 8	protein-coding
9_siCtrl_WDR5_peak_238	chr1	35544680	35545718	+	1323	NA	intron (NM_001319955, intron 1 of 8)	CpG	213	NM_024772	79830	Hs.471243	NM_024772	ENSG00000197056	ZMYM1	MYM	zinc finger MYM-type containing 1	protein-coding
9_siCtrl_WDR5_peak_3226	chr11	86013024	86013632	+	1323	NA	promoter-TSS (NM_016401)	promoter-TSS (NM_016401)	46	NM_016401	51501	Hs.283322	NM_016401	ENSG00000149196	HIKESHI	C11orf73|HLD13|HSPC138|HSPC179|L7RN6|OPI10	heat shock protein nuclear import factor hikeshi	protein-coding
9_siCtrl_WDR5_peak_17519	chr9	95087327	95088258	+	1322	NA	promoter-TSS (NM_017948)	promoter-TSS (NM_017948)	42	NM_001286969	401541	Hs.713775	NM_001012267	ENSG00000188312	CENPP	CENP-P	centromere protein P	protein-coding
9_siCtrl_WDR5_peak_10689	chr20	10414377	10416315	+	1322	NA	promoter-TSS (NM_001009608)	promoter-TSS (NM_001009608)	-459	NM_170784	8195	Hs.472119	NM_018848	ENSG00000125863	MKKS	BBS6|HMCS|KMS|MKS	McKusick-Kaufman syndrome	protein-coding
9_siCtrl_WDR5_peak_9734	chr2	73964021	73964910	+	1322	NA	promoter-TSS (NM_016058)	promoter-TSS (NM_016058)	7	NM_016058	51002	Hs.157401	NM_016058	ENSG00000144034	TPRKB	CGI-121|CGI121|GAMOS5	TP53RK binding protein	protein-coding
9_siCtrl_WDR5_peak_1064	chr1	156426504	156427633	+	1322	NA	Intergenic	CpG	-27728	NR_135264	10485	Hs.380027	NM_006365	ENSG00000125462	C1orf61	CROC4	chromosome 1 open reading frame 61	protein-coding
9_siCtrl_WDR5_peak_11452	chr22	36877195	36878522	+	1321	NA	promoter-TSS (NM_012473)	promoter-TSS (NM_012473)	-171	NM_012473	25828	Hs.211929	NM_012473	ENSG00000100348	TXN2	COXPD29|MT-TRX|MTRX|TRX2|TXN	thioredoxin 2	protein-coding
9_siCtrl_WDR5_peak_5024	chr14	45553245	45553980	+	1320	NA	intron (NM_017922, intron 1 of 13)	intron (NM_017922, intron 1 of 13)	293	NM_017922	55015	Hs.274337	NM_017922	ENSG00000185246	PRPF39	-	pre-mRNA processing factor 39	protein-coding
9_siCtrl_WDR5_peak_17580	chr9	100745076	100747534	+	1320	NA	intron (NM_006401, intron 1 of 6)	CpG	682	NM_006401	10541	Hs.730654	NM_006401	ENSG00000136938	ANP32B	APRIL|PHAPI2|SSP29	acidic nuclear phosphoprotein 32 family member B	protein-coding
9_siCtrl_WDR5_peak_903	chr1	145610391	145611886	+	1320	NA	promoter-TSS (NM_001303456)	promoter-TSS (NM_001303456)	120	NM_014455	27246	Hs.523550	NM_014455	ENSG00000265491	RNF115	BCA2|ZNF364	ring finger protein 115	protein-coding
9_siCtrl_WDR5_peak_6271	chr16	3507578	3508555	+	1318	NA	promoter-TSS (NM_001317095)	promoter-TSS (NM_001317095)	21	NM_001317098	79903	Hs.513296	NM_024845	ENSG00000122390	NAA60	HAT4|NAT15|NatF|hNaa60	N(alpha)-acetyltransferase 60, NatF catalytic subunit	protein-coding
9_siCtrl_WDR5_peak_14258	chr5	180650083	180650913	+	1316	NA	promoter-TSS (NR_039781)	promoter-TSS (NR_039781)	217	NR_045218	90933	Hs.441488	NM_033549	ENSG00000146063	TRIM41	RINCK	tripartite motif containing 41	protein-coding
9_siCtrl_WDR5_peak_1680	chr1	230222862	230223506	+	1314	NA	intron (NM_004481, intron 1 of 15)	intron (NM_004481, intron 1 of 15)	20199	NM_004481	2590	Hs.743964	NM_004481	ENSG00000143641	GALNT2	GalNAc-T2	polypeptide N-acetylgalactosaminyltransferase 2	protein-coding
9_siCtrl_WDR5_peak_9297	chr2	20549790	20551243	+	1312	NA	promoter-TSS (NM_001282752)	promoter-TSS (NM_001282752)	89	NM_001352927	23369	Hs.467824	NM_015317	ENSG00000055917	PUM2	PUMH2|PUML2	pumilio RNA binding family member 2	protein-coding
9_siCtrl_WDR5_peak_6706	chr16	70332818	70333710	+	1312	NA	intron (NM_001014449, intron 1 of 9)	intron (NM_001014449, intron 1 of 9)	308	NM_001257175	11269	Hs.221761	NM_007242	ENSG00000157349	DDX19B	DBP5|DDX19|RNAh	DEAD-box helicase 19B	protein-coding
9_siCtrl_WDR5_peak_11492	chr22	39915107	39917348	+	1310	NA	promoter-TSS (NM_001675)	promoter-TSS (NM_001675)	-337	NM_001675	468	Hs.496487	NM_001675	ENSG00000128272	ATF4	CREB-2|CREB2|TAXREB67|TXREB	activating transcription factor 4	protein-coding
9_siCtrl_WDR5_peak_3797	chr12	50372659	50373447	+	1310	NA	Intergenic	Intergenic	6323	NM_001652	363	Hs.54505	NM_001652	ENSG00000086159	AQP6	AQP2L|KID	aquaporin 6	protein-coding
9_siCtrl_WDR5_peak_9120	chr19	58144197	58144913	+	1310	NA	promoter-TSS (NR_049754)	promoter-TSS (NR_049754)	19	NM_001265599	10520	Hs.590977	NM_006385	ENSG00000121417	ZNF211	C2H2-25|CH2H2-25|ZNF-25	zinc finger protein 211	protein-coding
9_siCtrl_WDR5_peak_11863	chr3	47563507	47564344	+	1308	NA	Intergenic	Intergenic	-8723	NM_001031703	54859	Hs.311100	NM_017713	ENSG00000163832	ELP6	C3orf75|TMEM103	elongator acetyltransferase complex subunit 6	protein-coding
9_siCtrl_WDR5_peak_14744	chr6	49430495	49431645	+	1306	NA	promoter-TSS (NM_018132)	promoter-TSS (NM_018132)	-13	NM_018132	55166	Hs.88663	NM_018132	ENSG00000031691	CENPQ	C6orf139|CENP-Q	centromere protein Q	protein-coding
9_siCtrl_WDR5_peak_7086	chr17	28443528	28444636	+	1306	NA	promoter-TSS (NR_036149)	promoter-TSS (NR_036149)	-15	NR_029945	494335		NR_029945	ENSG00000283935	MIR423	MIRN423|hsa-mir-423|mir-423	microRNA 423	ncRNA
9_siCtrl_WDR5_peak_14172	chr5	172482973	172484717	+	1305	NA	intron (NM_001168393, intron 1 of 3)	CpG	490	NM_153607	153222	Hs.484195	NM_153607	ENSG00000164463	CREBRF	C5orf41|LRF	CREB3 regulatory factor	protein-coding
9_siCtrl_WDR5_peak_8617	chr19	19173749	19175183	+	1304	NA	promoter-TSS (NM_001321544)	promoter-TSS (NM_001321544)	-337	NM_178526	284439	Hs.303669	NM_178526	ENSG00000181035	SLC25A42	MECREN	solute carrier family 25 member 42	protein-coding
9_siCtrl_WDR5_peak_5163	chr14	69864352	69865681	+	1304	NA	promoter-TSS (NM_001330185)	promoter-TSS (NM_001330185)	0	NM_004450	2079	Hs.509791	NM_004450	ENSG00000100632	ERH	DROER	ERH mRNA splicing and mitosis factor	protein-coding
9_siCtrl_WDR5_peak_521	chr1	65314414	65314938	+	1302	NA	intron (NM_001321855, intron 13 of 25)	intron (NM_001321855, intron 13 of 25)	103918	NM_018211	55225	Hs.591443	NM_018211	ENSG00000162437	RAVER2	-	ribonucleoprotein, PTB binding 2	protein-coding
9_siCtrl_WDR5_peak_13966	chr5	140699747	140701127	+	1301	NA	promoter-TSS (NM_005642)	promoter-TSS (NM_005642)	-86	NM_005642	6879	Hs.438838	NM_005642	ENSG00000178913	TAF7	TAF2F|TAFII55	TATA-box binding protein associated factor 7	protein-coding
9_siCtrl_WDR5_peak_12508	chr3	185654581	185656226	+	1301	NA	intron (NM_004593, intron 1 of 8)	CpG	399	NM_004593	6434	Hs.533122	NM_004593	ENSG00000136527	TRA2B	Htra2-beta|PPP1R156|SFRS10|SRFS10|TRA2-BETA|TRAN2B	transformer 2 beta homolog	protein-coding
9_siCtrl_WDR5_peak_6584	chr16	52410716	52411282	+	1301	NA	Intergenic	Intergenic	118523	NR_135281	283854	Hs.266768	NR_135281	ENSG00000260887	CASC22	LINC01373|LincRNA-ENST00000515084|TCONS_00024290	cancer susceptibility 22	ncRNA
9_siCtrl_WDR5_peak_7868	chr17	79650157	79651756	+	1298	NA	promoter-TSS (NM_004712)	promoter-TSS (NM_004712)	-2	NM_001040025	339231	Hs.658789	NM_001040025	ENSG00000214087	ARL16	-	ADP ribosylation factor like GTPase 16	protein-coding
9_siCtrl_WDR5_peak_7883	chr17	79980417	79981598	+	1297	NA	promoter-TSS (NM_144999)	promoter-TSS (NM_144999)	-174	NM_144999	201255	Hs.143774	NM_144999	ENSG00000169683	LRRC45	-	leucine rich repeat containing 45	protein-coding
9_siCtrl_WDR5_peak_5049	chr14	51410525	51411533	+	1297	NA	exon (NM_001163940, exon 1 of 19)	exon (NM_001163940, exon 1 of 19)	172	NM_002863	5836	Hs.282417	NM_002863	ENSG00000100504	PYGL	GSD6	glycogen phosphorylase L	protein-coding
9_siCtrl_WDR5_peak_8993	chr19	50379297	50380707	+	1297	NA	promoter-TSS (NM_001168222)	promoter-TSS (NM_001168222)	-496	NM_001278159	84335	Hs.515542	NM_032375	ENSG00000204673	AKT1S1	Lobe|PRAS40	AKT1 substrate 1	protein-coding
9_siCtrl_WDR5_peak_17875	chr9	139760489	139761296	+	1295	NA	promoter-TSS (NM_001281297)	promoter-TSS (NM_001281297)	-104	NM_153200	8721	Hs.174050	NM_003792	ENSG00000107223	EDF1	CFAP280|EDF-1|MBF1	endothelial differentiation related factor 1	protein-coding
9_siCtrl_WDR5_peak_2844	chr11	36262070	36262763	+	1294	NA	Intergenic	Intergenic	48558	NM_001307937	29099	Hs.99443	NM_014186	ENSG00000110442	COMMD9	C11orf55|HSPC166|LINC00610	COMM domain containing 9	protein-coding
9_siCtrl_WDR5_peak_16589	chr8	36877449	36878719	+	1292	NA	Intergenic	Intergenic	-101387	NR_031672	100302233		NR_031672	ENSG00000221641	MIR1268A	MIR1268|MIRN1268|hsa-mir-1268|hsa-mir-1268a	microRNA 1268a	ncRNA
9_siCtrl_WDR5_peak_810	chr1	113333614	113334393	+	1292	NA	Intergenic	Intergenic	59262	NR_103746	100996702	Hs.632431	NR_103746	ENSG00000215866	LINC01356	-	long intergenic non-protein coding RNA 1356	ncRNA
9_siCtrl_WDR5_peak_14971	chr6	105667986	105668957	+	1291	NA	Intergenic	HERVL-int|LTR|ERVL	-40582	NM_022361	64208	Hs.458336	NM_022361	ENSG00000132429	POPDC3	POP3|bA355M14.1	popeye domain containing 3	protein-coding
9_siCtrl_WDR5_peak_16172	chr7	128694419	128695604	+	1290	NA	promoter-TSS (NR_002187)	promoter-TSS (NR_002187)	216	NM_012470	23534	Hs.193613	NM_012470	ENSG00000064419	TNPO3	IPO12|LGMD1F|LGMDD2|MTR10A|TRN-SR|TRN-SR2|TRNSR	transportin 3	protein-coding
9_siCtrl_WDR5_peak_11957	chr3	56716604	56717799	+	1289	NA	promoter-TSS (NM_001365636)	promoter-TSS (NM_001365636)	64	NM_001363940	23272	Hs.116877	NM_015224	ENSG00000163946	TASOR	C3orf63|FAM208A|RAP140|TASOR1|se89-1	transcription activation suppressor	protein-coding
9_siCtrl_WDR5_peak_3851	chr12	54582387	54583140	+	1285	NA	promoter-TSS (NM_001351246)	promoter-TSS (NM_001351246)	6	NM_001351240	23583	Hs.632721	NM_014311	ENSG00000123415	SMUG1	FDG|HMUDG|UNG3	single-strand-selective monofunctional uracil-DNA glycosylase 1	protein-coding
9_siCtrl_WDR5_peak_14688	chr6	41888618	41889633	+	1284	NA	promoter-TSS (NM_001305455)	promoter-TSS (NM_001305455)	-112	NM_004053	705	Hs.106880	NM_004053	ENSG00000112578	BYSL	BYSTIN|Enp1	bystin like	protein-coding
9_siCtrl_WDR5_peak_14500	chr6	28048399	28049337	+	1284	NA	5' UTR (NM_003447, exon 1 of 4)	5' UTR (NM_003447, exon 1 of 4)	522	NM_003447	7718	Hs.55481	NM_003447	ENSG00000197279	ZNF165	CT53|LD65|ZSCAN7	zinc finger protein 165	protein-coding
9_siCtrl_WDR5_peak_17876	chr9	139780381	139781404	+	1283	NA	promoter-TSS (NM_021138)	promoter-TSS (NM_021138)	-76	NM_021138	7186	Hs.522506	NM_021138	ENSG00000127191	TRAF2	MGC:45012|RNF117|TRAP|TRAP3	TNF receptor associated factor 2	protein-coding
9_siCtrl_WDR5_peak_3718	chr12	42297806	42298435	+	1283	NA	Intergenic	Intergenic	140129	NR_135040	101927038	Hs.98588	NR_135040	ENSG00000257784	LINC02400	-	long intergenic non-protein coding RNA 2400	ncRNA
9_siCtrl_WDR5_peak_17536	chr9	97372286	97373011	+	1282	NA	intron (NM_000507, intron 3 of 6)	intron (NM_000507, intron 3 of 6)	-16542	NM_003837	8789	Hs.61255	NM_003837	ENSG00000130957	FBP2	-	fructose-bisphosphatase 2	protein-coding
9_siCtrl_WDR5_peak_18062	chrX	70752265	70754144	+	1282	NA	intron (NM_181673, intron 1 of 21)	intron (NM_181673, intron 1 of 21)	250	NM_181672	8473	Hs.405410	NM_003605	ENSG00000147162	OGT	HINCUT-1|HRNT1|MRX106|O-GLCNAC|OGT1	O-linked N-acetylglucosamine (GlcNAc) transferase	protein-coding
9_siCtrl_WDR5_peak_8727	chr19	36193072	36193771	+	1281	NA	Intergenic	CpG	-2039	NM_001316902	27033	Hs.99430	NM_014383	ENSG00000011590	ZBTB32	FAXF|FAZF|Rog|TZFP|ZNF538	zinc finger and BTB domain containing 32	protein-coding
9_siCtrl_WDR5_peak_6333	chr16	12009004	12010382	+	1278	NA	5' UTR (NM_001130006, exon 1 of 15)	5' UTR (NM_001130006, exon 1 of 15)	120	NM_002094	2935	Hs.528780	NM_002094	ENSG00000103342	GSPT1	551G9.2|ETF3A|GST1|eRF3a	G1 to S phase transition 1	protein-coding
9_siCtrl_WDR5_peak_15138	chr6	131131282	131132063	+	1278	NA	Intergenic	Intergenic	-16873	NM_001195597	100507203	Hs.388715	NM_001195597	ENSG00000256162	SMLR1	-	small leucine rich protein 1	protein-coding
9_siCtrl_WDR5_peak_16963	chr8	110345994	110346881	+	1277	NA	promoter-TSS (NM_020189)	promoter-TSS (NM_020189)	-121	NM_032869	84955	Hs.380291	NM_032869	ENSG00000120526	NUDCD1	CML66|OVA66	NudC domain containing 1	protein-coding
9_siCtrl_WDR5_peak_13437	chr5	31531776	31532752	+	1276	NA	promoter-TSS (NM_018356)	promoter-TSS (NM_018356)	-64	NM_013235	29102	Hs.97997	NM_013235	ENSG00000113360	DROSHA	ETOHI2|HSA242976|RANSE3L|RN3|RNASE3L|RNASEN	drosha ribonuclease III	protein-coding
9_siCtrl_WDR5_peak_3008	chr11	64038175	64039057	+	1275	NA	intron (NM_004322, intron 2 of 2)	(CA)n|Simple_repeat|Simple_repeat	-13195	NM_001170726	56834	Hs.523763	NM_020155	ENSG00000173264	GPR137	C11orf4|GPR137A|TM7SF1L1	G protein-coupled receptor 137	protein-coding
9_siCtrl_WDR5_peak_3468	chr12	497792	499246	+	1274	NA	promoter-TSS (NM_001130147)	promoter-TSS (NM_001130147)	3	NM_001130147	84318	Hs.631656	NM_032358	ENSG00000120647	CCDC77	-	coiled-coil domain containing 77	protein-coding
9_siCtrl_WDR5_peak_3270	chr11	105892488	105893609	+	1274	NA	promoter-TSS (NM_001318747)	promoter-TSS (NM_001318747)	-34	NM_001318750	84437	Hs.266782	NM_032424	ENSG00000170903	MSANTD4	KIAA1826	Myb/SANT DNA binding domain containing 4 with coiled-coils	protein-coding
9_siCtrl_WDR5_peak_11735	chr3	24033301	24034037	+	1274	NA	Intergenic	Intergenic	46057	NM_001145425	9975	Hs.37288	NM_005126	ENSG00000174738	NR1D2	BD73|EAR-1R|REVERBB|REVERBbeta|RVR	nuclear receptor subfamily 1 group D member 2	protein-coding
9_siCtrl_WDR5_peak_4168	chr12	104350480	104351554	+	1274	NA	promoter-TSS (NM_001135570)	promoter-TSS (NM_001135570)	-24	NM_001135570	728568	Hs.42547	NM_001135570	ENSG00000204954	C12orf73	-	chromosome 12 open reading frame 73	protein-coding
9_siCtrl_WDR5_peak_11909	chr3	50388200	50388763	+	1273	NA	promoter-TSS (NM_006545)	promoter-TSS (NM_006545)	188	NM_001291284	11068	Hs.149443	NM_007022	ENSG00000114395	CYB561D2	101F6|TSP10|XXcos-LUCA11.4	cytochrome b561 family member D2	protein-coding
9_siCtrl_WDR5_peak_18124	chrX	103401205	103401968	+	1271	NA	5' UTR (NM_001012755, exon 1 of 2)	5' UTR (NM_001012755, exon 1 of 2)	104	NM_001012755	401612	Hs.660022	NM_001012755	ENSG00000269743	SLC25A53	MCART6	solute carrier family 25 member 53	protein-coding
9_siCtrl_WDR5_peak_6850	chr17	2951902	2952677	+	1268	NA	Intergenic	CpG	14612	NM_014566	8386	Hs.553508	NM_014566	ENSG00000262628	OR1D5	C17orf2|OR17-2|OR17-30|OR17-31|OR1D4	olfactory receptor family 1 subfamily D member 5	protein-coding
9_siCtrl_WDR5_peak_15986	chr7	97735972	97736803	+	1268	NA	5' UTR (NM_014916, exon 1 of 14)	5' UTR (NM_014916, exon 1 of 14)	213	NM_014916	22853	Hs.444179	NM_014916	ENSG00000164715	LMTK2	AATYK2|BREK|KPI-2|KPI2|LMR2|PPP1R100|cprk|hBREK	lemur tyrosine kinase 2	protein-coding
9_siCtrl_WDR5_peak_1421	chr1	205718738	205720020	+	1267	NA	promoter-TSS (NM_022731)	promoter-TSS (NM_022731)	-69	NM_022731	64710	Hs.213061	NM_022731	ENSG00000069275	NUCKS1	JC7|NUCKS	nuclear casein kinase and cyclin dependent kinase substrate 1	protein-coding
9_siCtrl_WDR5_peak_3496	chr12	2921528	2922555	+	1267	NA	promoter-TSS (NR_146317)	promoter-TSS (NR_146317)	49	NR_146317	283440	Hs.448720	NR_033958	ENSG00000256150	ITFG2-AS1	-	ITFG2 antisense RNA 1	ncRNA
9_siCtrl_WDR5_peak_2257	chr10	85899037	85899908	+	1266	NA	intron (NM_014394, intron 1 of 8)	CpG	207	NM_014394	27069	Hs.352656	NM_014394	ENSG00000165678	GHITM	DERP2|HSPC282|MICS1|My021|PTD010|TMBIM5	growth hormone inducible transmembrane protein	protein-coding
9_siCtrl_WDR5_peak_6469	chr16	29623694	29625486	+	1265	NA	non-coding (NR_135317, exon 1 of 12)	non-coding (NR_135317, exon 1 of 12)	448	NR_135317	440354	Hs.552700	NR_002473		SMG1P2	-	SMG1 pseudogene 2	pseudo
9_siCtrl_WDR5_peak_772	chr1	109791509	109792202	+	1265	NA	promoter-TSS (NM_001408)	promoter-TSS (NM_001408)	-306	NM_001408	1952	Hs.57652	NM_001408	ENSG00000143126	CELSR2	ADGRC2|CDHF10|EGFL2|Flamingo1|MEGF3	cadherin EGF LAG seven-pass G-type receptor 2	protein-coding
9_siCtrl_WDR5_peak_9953	chr2	113032671	113033937	+	1265	NA	5' UTR (NM_198581, exon 1 of 12)	5' UTR (NM_198581, exon 1 of 12)	130	NM_198581	376940	Hs.190477	NM_198581	ENSG00000188177	ZC3H6	ZC3HDC6	zinc finger CCCH-type containing 6	protein-coding
9_siCtrl_WDR5_peak_5228	chr14	76952484	76953162	+	1265	NA	intron (NM_004452, intron 7 of 10)	intron (NM_004452, intron 7 of 10)	115133	NM_004452	2103	Hs.435845	NM_004452	ENSG00000119715	ESRRB	DFNB35|ERR2|ERRb|ESRL2|NR3B2	estrogen related receptor beta	protein-coding
9_siCtrl_WDR5_peak_3792	chr12	50100817	50101725	+	1264	NA	promoter-TSS (NM_001367835)	promoter-TSS (NM_001367835)	-83	NM_198900	91010	Hs.179838	NM_175736	ENSG00000161791	FMNL3	FHOD3|FRL2|WBP-3|WBP3	formin like 3	protein-coding
9_siCtrl_WDR5_peak_6085	chr15	90808099	90809505	+	1264	NA	promoter-TSS (NR_028052)	promoter-TSS (NR_028052)	-93	NM_001033088	51335	Hs.135471	NM_016645	ENSG00000182768	NGRN	DSC92	neugrin, neurite outgrowth associated	protein-coding
9_siCtrl_WDR5_peak_15757	chr7	55433043	55434408	+	1262	NA	exon (NM_018697, exon 1 of 9)	exon (NM_018697, exon 1 of 9)	584	NM_018697	55915	Hs.595384	NM_018697	ENSG00000132434	LANCL2	GPR69B|TASP	LanC like 2	protein-coding
9_siCtrl_WDR5_peak_15193	chr6	142468227	142468863	+	1262	NA	promoter-TSS (NM_001324308)	promoter-TSS (NM_001324308)	145	NM_016485	51534	Hs.431367	NM_016485	ENSG00000009844	VTA1	C6orf55|DRG-1|DRG1|HSPC228|LIP5|My012|SBP1	vesicle trafficking 1	protein-coding
9_siCtrl_WDR5_peak_197	chr1	28240689	28241867	+	1260	NA	promoter-TSS (NM_001355129)	promoter-TSS (NM_001355129)	30	NM_001355128	6118	Hs.79411	NM_002946	ENSG00000117748	RPA2	REPA2|RP-A p32|RP-A p34|RPA32	replication protein A2	protein-coding
9_siCtrl_WDR5_peak_6086	chr15	90895079	90895892	+	1259	NA	promoter-TSS (NM_001004309)	promoter-TSS (NM_001004309)	-31	NM_001004309	342132	Hs.55307	NM_001004309	ENSG00000196391	ZNF774	-	zinc finger protein 774	protein-coding
9_siCtrl_WDR5_peak_14623	chr6	34855350	34856307	+	1259	NA	promoter-TSS (NM_005643)	promoter-TSS (NM_005643)	-9	NM_005643	6882	Hs.112444	NM_005643	ENSG00000064995	TAF11	MGC:15243|PRO2134|TAF2I|TAFII28	TATA-box binding protein associated factor 11	protein-coding
9_siCtrl_WDR5_peak_2891	chr11	46450519	46451042	+	1259	NA	intron (NM_001267782, intron 16 of 19)	intron (NM_001267782, intron 16 of 19)	-22577	NR_036118	100422825		NR_036118	ENSG00000283497	MIR3160-2	mir-3160-2	microRNA 3160-2	ncRNA
9_siCtrl_WDR5_peak_1546	chr1	216894880	216895556	+	1258	NA	intron (NM_001243513, intron 1 of 7)	intron (NM_001243513, intron 1 of 7)	1553	NM_001438	2104	Hs.444225	NM_001438	ENSG00000196482	ESRRG	ERR-gamma|ERR3|ERRg|ERRgamma|NR3B3	estrogen related receptor gamma	protein-coding
9_siCtrl_WDR5_peak_6025	chr15	85258675	85259746	+	1258	NA	intron (NM_001271918, intron 1 of 6)	CpG	160	NM_014300	23478	Hs.9534	NM_014300	ENSG00000140612	SEC11A	1810012E07Rik|SEC11L1|SPC18|SPCS4A|sid2895	SEC11 homolog A, signal peptidase complex subunit	protein-coding
9_siCtrl_WDR5_peak_3065	chr11	66205870	66206671	+	1257	NA	promoter-TSS (NM_170738)	promoter-TSS (NM_170738)	49	NR_120588	65003	Hs.418450	NM_016050	ENSG00000174547	MRPL11	CGI-113|L11MT|MRP-L11	mitochondrial ribosomal protein L11	protein-coding
9_siCtrl_WDR5_peak_860	chr1	117663950	117665111	+	1257	NA	promoter-TSS (NM_025188)	promoter-TSS (NM_025188)	-159	NM_001145635	80263	Hs.301526	NM_025188	ENSG00000134253	TRIM45	RNF99	tripartite motif containing 45	protein-coding
9_siCtrl_WDR5_peak_8530	chr19	13885012	13885619	+	1257	NA	promoter-TSS (NM_014047)	promoter-TSS (NM_014047)	45	NM_014047	28974	Hs.231616	NM_014047	ENSG00000104979	C19orf53	HSPC023|LYDG10	chromosome 19 open reading frame 53	protein-coding
9_siCtrl_WDR5_peak_17329	chr9	37486574	37487523	+	1256	NA	intron (NM_022490, intron 2 of 11)	L2b|LINE|L2	1103	NM_022490	64425	Hs.591087	NM_022490	ENSG00000137054	POLR1E	PAF53|PRAF1	RNA polymerase I subunit E	protein-coding
9_siCtrl_WDR5_peak_4333	chr12	119740047	119740907	+	1256	NA	intron (NR_024246, intron 1 of 3)	intron (NR_024246, intron 1 of 3)	708	NR_024246	144742	Hs.524782	NR_024246	ENSG00000281196	LINC00934	-	long intergenic non-protein coding RNA 934	ncRNA
9_siCtrl_WDR5_peak_635	chr1	88928028	88929008	+	1254	NA	Intergenic	CpG	-221309	NM_001320707	5586	Hs.440833	NM_006256	ENSG00000065243	PKN2	PAK2|PRK2|PRKCL2|PRO2042|Pak-2|STK7	protein kinase N2	protein-coding
9_siCtrl_WDR5_peak_2497	chr10	118469559	118470107	+	1254	NA	intron (NM_001330164, intron 2 of 12)	intron (NM_001330164, intron 2 of 12)	32244	NM_025015	259217	Hs.648448	NM_025015	ENSG00000165868	HSPA12A	-	heat shock protein family A (Hsp70) member 12A	protein-coding
9_siCtrl_WDR5_peak_4665	chr13	46355488	46356691	+	1253	NA	3' UTR (NM_198849, exon 2 of 2)	3' UTR (NM_198849, exon 2 of 2)	69799	NM_198849	283514	Hs.368483	NM_198849	ENSG00000215475	SIAH3	-	siah E3 ubiquitin protein ligase family member 3	protein-coding
9_siCtrl_WDR5_peak_2977	chr11	62521273	62522079	+	1253	NA	promoter-TSS (NM_001363108)	promoter-TSS (NM_001363108)	-44	NM_024784	79842	Hs.147554	NM_024784	ENSG00000185670	ZBTB3	-	zinc finger and BTB domain containing 3	protein-coding
9_siCtrl_WDR5_peak_5122	chr14	61611879	61612918	+	1253	NA	Intergenic	Intergenic	135658	NM_001017970	161291	Hs.146180	NM_001017970	ENSG00000182107	TMEM30B	CDC50B	transmembrane protein 30B	protein-coding
9_siCtrl_WDR5_peak_9004	chr19	51196967	51199107	+	1253	NA	intron (NM_016148, intron 15 of 23)	G-rich|Low_complexity|Low_complexity	25022	NM_016148	50944	Hs.274255	NM_016148	ENSG00000161681	SHANK1	SPANK-1|SSTRIP|synamon	SH3 and multiple ankyrin repeat domains 1	protein-coding
9_siCtrl_WDR5_peak_4422	chr12	125398707	125399813	+	1252	NA	promoter-TSS (NR_049820)	promoter-TSS (NR_049820)	-64	NM_021009	7316	Hs.520348	NM_021009	ENSG00000150991	UBC	HMG20	ubiquitin C	protein-coding
9_siCtrl_WDR5_peak_17839	chr9	136242155	136243531	+	1252	NA	promoter-TSS (NM_033161)	promoter-TSS (NM_033161)	88	NM_033161	6836	Hs.512465	NM_033161	ENSG00000148248	SURF4	ERV29	surfeit 4	protein-coding
9_siCtrl_WDR5_peak_10920	chr20	44600096	44601135	+	1252	NA	intron (NM_022095, intron 1 of 27)	CpG-16708	227	NM_022095	63925	Hs.174193	NM_022095	ENSG00000198026	ZNF335	MCPH10|NIF-1|NIF1|NIF2	zinc finger protein 335	protein-coding
9_siCtrl_WDR5_peak_508	chr1	63988479	63989709	+	1245	NA	promoter-TSS (NM_032437)	promoter-TSS (NM_032437)	-102	NM_032437	84455	Hs.652324	NM_032437	ENSG00000203965	EFCAB7	-	EF-hand calcium binding domain 7	protein-coding
9_siCtrl_WDR5_peak_9977	chr2	120770298	120771351	+	1244	NA	5' UTR (NM_001184938, exon 1 of 17)	5' UTR (NM_001184938, exon 1 of 17)	171	NR_138472	57669	Hs.369232	NM_020909	ENSG00000115109	EPB41L5	BE37|YMO1|YRT	erythrocyte membrane protein band 4.1 like 5	protein-coding
9_siCtrl_WDR5_peak_11437	chr22	34225497	34226225	+	1244	NA	intron (NM_001362953, intron 1 of 14)	intron (NM_001362953, intron 1 of 14)	90555	NM_133642	9215	Hs.474667	NM_004737	ENSG00000133424	LARGE1	LARGE|MDC1D|MDDGA6|MDDGB6	LARGE xylosyl- and glucuronyltransferase 1	protein-coding
9_siCtrl_WDR5_peak_7233	chr17	41276422	41278461	+	1243	NA	promoter-TSS (NM_007297)	promoter-TSS (NM_007297)	59	NM_007294	672	Hs.194143	NM_007294	ENSG00000012048	BRCA1	BRCAI|BRCC1|BROVCA1|FANCS|IRIS|PNCA4|PPP1R53|PSCP|RNF53	BRCA1 DNA repair associated	protein-coding
9_siCtrl_WDR5_peak_699	chr1	95538005	95538840	+	1243	NA	promoter-TSS (NM_001305242)	promoter-TSS (NM_001305242)	85	NR_131032	199857	Hs.408927	NM_144988	ENSG00000172339	ALG14	CMS15	ALG14 UDP-N-acetylglucosaminyltransferase subunit	protein-coding
9_siCtrl_WDR5_peak_4390	chr12	123848817	123850377	+	1242	NA	promoter-TSS (NM_001167856)	promoter-TSS (NM_001167856)	102	NR_157805	112268105	Hs.7012	NR_157805		SBNO1-AS1	-	SBNO1 antisense RNA 1	ncRNA
9_siCtrl_WDR5_peak_2072	chr10	46951303	46952155	+	1242	NA	TTS (NM_001370184)	TTS (NM_001370184)	257	NR_155739	101927699	Hs.663831	NR_155739		LOC101927699	-	uncharacterized LOC101927699	ncRNA
9_siCtrl_WDR5_peak_16905	chr8	100024946	100025906	+	1242	NA	promoter-TSS (NM_017890)	promoter-TSS (NM_017890)	-68	NM_152564	157680	Hs.191540	NM_015243	ENSG00000132549	VPS13B	CHS1|COH1	vacuolar protein sorting 13 homolog B	protein-coding
9_siCtrl_WDR5_peak_14254	chr5	180287318	180288839	+	1240	NA	intron (NM_152283, intron 1 of 2)	CpG	208	NM_152283	643836	Hs.509227	NM_152283	ENSG00000196670	ZFP62	ZET|ZNF755	ZFP62 zinc finger protein	protein-coding
9_siCtrl_WDR5_peak_17041	chr8	131652539	131653261	+	1239	NA	Intergenic	MIRb|SINE|MIR	-196980	NM_018482	50807	Hs.655552	NM_018482	ENSG00000153317	ASAP1	AMAP1|CENTB4|DDEF1|PAG2|PAP|ZG14P	ArfGAP with SH3 domain, ankyrin repeat and PH domain 1	protein-coding
9_siCtrl_WDR5_peak_11188	chr21	35987238	35987973	+	1239	NA	promoter-TSS (NM_004414)	promoter-TSS (NM_004414)	-193	NM_004414	1827	Hs.282326	NM_004414	ENSG00000159200	RCAN1	ADAPT78|CSP1|DSC1|DSCR1|MCIP1|RCN1	regulator of calcineurin 1	protein-coding
9_siCtrl_WDR5_peak_5189	chr14	73924800	73925742	+	1239	NA	promoter-TSS (NM_003744)	promoter-TSS (NM_003744)	15	NM_001005745	8650	Hs.525443	NM_003744	ENSG00000133961	NUMB	C14orf41|S171|c14_5527	NUMB endocytic adaptor protein	protein-coding
9_siCtrl_WDR5_peak_7163	chr17	36981297	36982082	+	1239	NA	promoter-TSS (NR_039880)	promoter-TSS (NR_039880)	-86	NR_073428	54883	Hs.406223	NM_017748	ENSG00000273559	CWC25	CCDC49	CWC25 spliceosome associated protein homolog	protein-coding
9_siCtrl_WDR5_peak_17835	chr9	136023683	136024580	+	1237	NA	intron (NM_001042368, intron 1 of 17)	MIR3|SINE|MIR	466	NM_001042368	5900	Hs.106185	NM_006266	ENSG00000160271	RALGDS	RGDS|RGF|RalGEF	ral guanine nucleotide dissociation stimulator	protein-coding
9_siCtrl_WDR5_peak_5663	chr15	52093603	52094215	+	1235	NA	intron (NM_014548, intron 8 of 9)	intron (NM_014548, intron 8 of 9)	-27941	NM_014547	29766	Hs.4998	NM_014547	ENSG00000138594	TMOD3	UTMOD	tropomodulin 3	protein-coding
9_siCtrl_WDR5_peak_7586	chr17	62340710	62341722	+	1234	NA	promoter-TSS (NM_001288732)	promoter-TSS (NM_001288732)	-596	NM_001288732	55852	Hs.175414	NM_018469	ENSG00000136478	TEX2	HT008|TMEM96	testis expressed 2	protein-coding
9_siCtrl_WDR5_peak_8992	chr19	50369936	50370943	+	1234	NA	exon (NM_007254, exon 2 of 17)	exon (NM_007254, exon 2 of 17)	394	NM_007254	11284	Hs.78016	NM_007254	ENSG00000039650	PNKP	AOA4|EIEE10|MCSZ|PNK	polynucleotide kinase 3'-phosphatase	protein-coding
9_siCtrl_WDR5_peak_10829	chr20	33459631	33460749	+	1233	NA	intron (NM_178026, intron 1 of 14)	intron (NM_178026, intron 1 of 14)	469	NM_178026	2686	Hs.433738	NM_178026	ENSG00000131067	GGT7	D20S101|GGT4|GGTL3|GGTL5	gamma-glutamyltransferase 7	protein-coding
9_siCtrl_WDR5_peak_11092	chr20	62289326	62290139	+	1232	NA	non-coding (NR_037882, exon 1 of 38)	non-coding (NR_037882, exon 1 of 38)	569	NR_037882	100533107	Hs.745057	NR_037882	ENSG00000026036	RTEL1-TNFRSF6B	-	RTEL1-TNFRSF6B readthrough (NMD candidate)	ncRNA
9_siCtrl_WDR5_peak_7663	chr17	71114755	71115884	+	1232	NA	Intergenic	Intergenic	-26492	NM_001352692	201266	Hs.221127	NM_139177	ENSG00000133195	SLC39A11	C17orf26|ZIP-11|ZIP11	solute carrier family 39 member 11	protein-coding
9_siCtrl_WDR5_peak_12821	chr4	52708368	52710266	+	1232	NA	promoter-TSS (NM_001287755)	promoter-TSS (NM_001287755)	-2	NM_001040402	23142	Hs.605388	NM_015115	ENSG00000109184	DCUN1D4	-	defective in cullin neddylation 1 domain containing 4	protein-coding
9_siCtrl_WDR5_peak_4030	chr12	74931447	74932759	+	1230	NA	exon (NM_001136262, exon 1 of 1)	exon (NM_001136262, exon 1 of 1)	488	NM_001136262	552889	Hs.744849	NM_001136262	ENSG00000253719	ATXN7L3B	lnc-SCA7	ataxin 7 like 3B	protein-coding
9_siCtrl_WDR5_peak_16571	chr8	30601245	30602450	+	1230	NA	intron (NM_001282189, intron 1 of 8)	intron (NM_001282189, intron 1 of 8)	165	NM_001282199	7993	Hs.153678	NM_005671	ENSG00000104691	UBXN8	D8S2298E|REP8|UBXD6	UBX domain protein 8	protein-coding
9_siCtrl_WDR5_peak_10842	chr20	34359364	34360676	+	1230	NA	promoter-TSS (NM_016436)	promoter-TSS (NM_016436)	83	NM_016436	51230	Hs.517044	NM_016436	ENSG00000025293	PHF20	C20orf104|GLEA2|HCA58|NZF|TDRD20A|TZP	PHD finger protein 20	protein-coding
9_siCtrl_WDR5_peak_11570	chr22	46067450	46068585	+	1230	NA	exon (NM_013236, exon 1 of 12)	exon (NM_013236, exon 1 of 12)	303	NM_013236	25814	Hs.475125	NM_013236	ENSG00000130638	ATXN10	E46L|HUMEEP|SCA10	ataxin 10	protein-coding
9_siCtrl_WDR5_peak_16402	chr8	6565409	6566772	+	1229	NA	promoter-TSS (NM_018361)	promoter-TSS (NM_018361)	-73	NM_018361	55326	Hs.624002	NM_018361	ENSG00000155189	AGPAT5	1AGPAT5|LPAATE	1-acylglycerol-3-phosphate O-acyltransferase 5	protein-coding
9_siCtrl_WDR5_peak_1624	chr1	226270969	226272002	+	1229	NA	non-coding (NR_146920, exon 1 of 4)	non-coding (NR_146920, exon 1 of 4)	209	NR_146920	105373113	Hs.149726	NR_146920		LINC01703	lncPARP1	long intergenic non-protein coding RNA 1703	ncRNA
9_siCtrl_WDR5_peak_16776	chr8	74883994	74885014	+	1228	NA	promoter-TSS (NM_001204864)	promoter-TSS (NM_001204864)	18	NM_001204857	6921	Hs.533437	NM_005648	ENSG00000154582	ELOC	SIII|TCEB1	elongin C	protein-coding
9_siCtrl_WDR5_peak_17635	chr9	110879996	110880843	+	1226	NA	Intergenic	Intergenic	-628369	NM_004235	9314	Hs.376206	NM_004235	ENSG00000136826	KLF4	EZF|GKLF	Kruppel like factor 4	protein-coding
9_siCtrl_WDR5_peak_2391	chr10	103211278	103211791	+	1226	NA	intron (NM_001256856, intron 2 of 13)	intron (NM_001256856, intron 2 of 13)	97612	NM_033637	8945	Hs.643802	NM_003939	ENSG00000166167	BTRC	BETA-TRCP|FBW1A|FBXW1|FBXW1A|FWD1|bTrCP|bTrCP1|betaTrCP	beta-transducin repeat containing E3 ubiquitin protein ligase	protein-coding
9_siCtrl_WDR5_peak_16433	chr8	11058661	11059487	+	1226	NA	promoter-TSS (NR_138152)	promoter-TSS (NR_138152)	-199	NR_138154	286046	Hs.657083	NM_173683	ENSG00000171044	XKR6	C8orf21|C8orf5|C8orf7|XRG6	XK related 6	protein-coding
9_siCtrl_WDR5_peak_17327	chr9	37119726	37121135	+	1224	NA	promoter-TSS (NM_001289120)	promoter-TSS (NM_001289120)	-39	NR_110317	84186	Hs.654700	NM_032226	ENSG00000147905	ZCCHC7	AIR1|HSPC086	zinc finger CCHC-type containing 7	protein-coding
9_siCtrl_WDR5_peak_9052	chr19	54640931	54641912	+	1224	NA	promoter-TSS (NM_014516)	promoter-TSS (NM_014516)	-57	NM_014516	4849	Hs.343571	NM_014516	ENSG00000088038	CNOT3	LENG2|NOT3|NOT3H	CCR4-NOT transcription complex subunit 3	protein-coding
9_siCtrl_WDR5_peak_4922	chr14	20937492	20938894	+	1224	NA	intron (NM_000270, intron 1 of 5)	intron (NM_000270, intron 1 of 5)	655	NM_000270	4860	Hs.75514	NM_000270	ENSG00000198805	PNP	NP|PRO1837|PUNP	purine nucleoside phosphorylase	protein-coding
9_siCtrl_WDR5_peak_7836	chr17	78518385	78519367	+	1223	NA	5' UTR (NM_020761, exon 1 of 34)	5' UTR (NM_020761, exon 1 of 34)	238	NM_001163034	57521	Hs.133044	NM_020761	ENSG00000141564	RPTOR	KOG1|Mip1	regulatory associated protein of MTOR complex 1	protein-coding
9_siCtrl_WDR5_peak_4254	chr12	110939338	110940473	+	1223	NA	promoter-TSS (NM_001286535)	promoter-TSS (NM_001286535)	11	NM_016226	51699	Hs.600114	NM_016226	ENSG00000111237	VPS29	DC15|DC7|PEP11	VPS29 retromer complex component	protein-coding
9_siCtrl_WDR5_peak_6838	chr17	2239138	2240145	+	1222	NA	exon (NM_018128, exon 1 of 15)	exon (NM_018128, exon 1 of 15)	1037	NM_018128	55720	Hs.388170	NM_018128	ENSG00000167721	TSR1	-	TSR1 ribosome maturation factor	protein-coding
9_siCtrl_WDR5_peak_999	chr1	154192024	154193088	+	1222	NA	promoter-TSS (NM_014847)	promoter-TSS (NM_014847)	-92	NM_001127320	9898	Hs.490551	NM_014847	ENSG00000143569	UBAP2L	NICE-4|NICE4	ubiquitin associated protein 2 like	protein-coding
9_siCtrl_WDR5_peak_14754	chr6	52148954	52150014	+	1222	NA	promoter-TSS (NM_002388)	promoter-TSS (NM_002388)	56	NM_001366371	4172	Hs.179565	NM_002388	ENSG00000112118	MCM3	HCC5|P1-MCM3|P1.h|RLFB	minichromosome maintenance complex component 3	protein-coding
9_siCtrl_WDR5_peak_6635	chr16	58426038	58426992	+	1219	NA	exon (NM_001126130, exon 1 of 2)	exon (NM_001126130, exon 1 of 2)	140	NM_022770	64785	Hs.47125	NM_022770	ENSG00000181938	GINS3	PSF3	GINS complex subunit 3	protein-coding
9_siCtrl_WDR5_peak_392	chr1	54303534	54304470	+	1218	NA	promoter-TSS (NM_018087)	promoter-TSS (NM_018087)	-33	NM_001168551	55706	Hs.476525	NM_018087	ENSG00000058804	NDC1	NET3|TMEM48	NDC1 transmembrane nucleoporin	protein-coding
9_siCtrl_WDR5_peak_11773	chr3	33480965	33482700	+	1217	NA	promoter-TSS (NM_014517)	promoter-TSS (NM_014517)	38	NM_001128160	7342	Hs.729120	NM_014517	ENSG00000153560	UBP1	LBP-1B|LBP-1a|LBP1A|LBP1B	upstream binding protein 1	protein-coding
9_siCtrl_WDR5_peak_5920	chr15	75628045	75628884	+	1217	NA	promoter-TSS (NM_001284377)	promoter-TSS (NM_001284377)	60	NM_001321848	54939	Hs.351327	NM_017828	ENSG00000140365	COMMD4	-	COMM domain containing 4	protein-coding
9_siCtrl_WDR5_peak_15889	chr7	75039234	75040188	+	1217	NA	non-coding (NR_033322, exon 1 of 11)	non-coding (NR_033322, exon 1 of 11)	106	NR_104013	155400	Hs.436034	NM_001039575	ENSG00000223705	NSUN5P1	NSUN5B|WBSCR20B	NSUN5 pseudogene 1	pseudo
9_siCtrl_WDR5_peak_6172	chr15	101834587	101835988	+	1217	NA	intron (NR_135508, intron 1 of 7)	CpG	166	NR_135507	6627	Hs.528763	NM_003090	ENSG00000131876	SNRPA1	Lea1|U2A'	small nuclear ribonucleoprotein polypeptide A'	protein-coding
9_siCtrl_WDR5_peak_14199	chr5	175815149	175816669	+	1217	NA	promoter-TSS (NM_001256539)	promoter-TSS (NM_001256539)	19	NM_001256539	51491	Hs.696283	NM_016391	ENSG00000048162	NOP16	HSPC111|HSPC185	NOP16 nucleolar protein	protein-coding
9_siCtrl_WDR5_peak_7409	chr17	49230476	49231807	+	1216	NA	intron (NM_000269, intron 1 of 4)	CpG	221	NM_000269	4830	Hs.463456	NM_000269	ENSG00000239672	NME1	AWD|GAAD|NB|NBS|NDKA|NDPK-A|NDPKA|NM23|NM23-H1	NME/NM23 nucleoside diphosphate kinase 1	protein-coding
9_siCtrl_WDR5_peak_9053	chr19	54663006	54664075	+	1215	NA	promoter-TSS (NM_024316)	promoter-TSS (NM_024316)	-81	NM_024316	79165	Hs.590974	NM_024316	ENSG00000105617	LENG1	-	leukocyte receptor cluster member 1	protein-coding
9_siCtrl_WDR5_peak_10512	chr2	227663425	227665062	+	1214	NA	promoter-TSS (NM_001349069)	promoter-TSS (NM_001349069)	-632	NM_001349069	84236	Hs.471514	NM_032276	ENSG00000144468	RHBDD1	RHBDL4|RRP4	rhomboid domain containing 1	protein-coding
9_siCtrl_WDR5_peak_967	chr1	151137893	151138994	+	1213	NA	promoter-TSS (NM_001204856)	promoter-TSS (NM_001204856)	-55	NM_024041	79005	Hs.732060	NM_024041	ENSG00000163156	SCNM1	-	sodium channel modifier 1	protein-coding
9_siCtrl_WDR5_peak_10817	chr20	32398785	32399466	+	1213	NA	promoter-TSS (NR_110623)	promoter-TSS (NR_110623)	-29	NM_176812	128866	Hs.472471	NM_176812	ENSG00000101421	CHMP4B	C20orf178|CHMP4A|CTPP3|CTRCT31|SNF7|SNF7-2|Shax1|VPS32B|Vps32-2|dJ553F4.4	charged multivesicular body protein 4B	protein-coding
9_siCtrl_WDR5_peak_297	chr1	43311734	43312547	+	1211	NA	promoter-TSS (NM_015911)	promoter-TSS (NM_015911)	-104	NM_015911	51058	Hs.20879	NM_015911	ENSG00000164011	ZNF691	Zfp691	zinc finger protein 691	protein-coding
9_siCtrl_WDR5_peak_3200	chr11	78830493	78831478	+	1211	NA	intron (NM_001098816, intron 4 of 33)	intron (NM_001098816, intron 4 of 33)	282168	NR_030598	100126333		NR_030598	ENSG00000211997	MIR708	MIRN708|hsa-mir-708	microRNA 708	ncRNA
9_siCtrl_WDR5_peak_5329	chr14	96000511	96001824	+	1209	NA	promoter-TSS (NR_001459)	promoter-TSS (NR_001459)	42	NR_003138	283596	Hs.448753	NR_001459		SNHG10	C14orf62|LINC00063|NCRNA00063	small nucleolar RNA host gene 10	ncRNA
9_siCtrl_WDR5_peak_17465	chr9	86322177	86323577	+	1208	NA	promoter-TSS (NM_013438)	promoter-TSS (NM_013438)	-4	NM_013438	29979	Hs.9589	NM_013438	ENSG00000135018	UBQLN1	DA41|DSK2|PLIC-1|UBQN|XDRP1	ubiquilin 1	protein-coding
9_siCtrl_WDR5_peak_954	chr1	150487474	150488143	+	1208	NA	promoter-TSS (NR_051960)	promoter-TSS (NR_051960)	-425	NR_051960	100874054	Hs.576460	NR_051960	ENSG00000228126	FALEC	FAL1|LINC00568|ncRNA-a1	focally amplified long non-coding RNA in epithelial cancer	ncRNA
9_siCtrl_WDR5_peak_6218	chr16	1876793	1877676	+	1208	NA	promoter-TSS (NM_005326)	promoter-TSS (NM_005326)	9	NM_001018104	81889	Hs.513265	NM_031208	ENSG00000180185	FAHD1	C16orf36|YISKL	fumarylacetoacetate hydrolase domain containing 1	protein-coding
9_siCtrl_WDR5_peak_8934	chr19	47987245	47987703	+	1207	NA	promoter-TSS (NR_038452)	promoter-TSS (NR_038452)	2	NM_001291296	11133	Hs.25441	NM_007059	ENSG00000118162	KPTN	2E4|MRT41	kaptin, actin binding protein	protein-coding
9_siCtrl_WDR5_peak_8953	chr19	48972192	48973102	+	1205	NA	promoter-TSS (NM_004228)	promoter-TSS (NM_004228)	21	NM_004228	9266	Hs.144011	NM_004228	ENSG00000105443	CYTH2	ARNO|CTS18|CTS18.1|PSCD2|PSCD2L|SEC7L|Sec7p-L|Sec7p-like|cytohesin-2	cytohesin 2	protein-coding
9_siCtrl_WDR5_peak_2929	chr11	57479474	57480536	+	1204	NA	promoter-TSS (NM_153450)	promoter-TSS (NM_153450)	10	NR_037645	51075	Hs.654965	NM_015959	ENSG00000213593	TMX2	CGI-31|PDIA12|PIG26|TXNDC14	thioredoxin related transmembrane protein 2	protein-coding
9_siCtrl_WDR5_peak_13736	chr5	98263567	98265965	+	1204	NA	promoter-TSS (NR_036530)	promoter-TSS (NR_036530)	-72	NR_036530	100289230	Hs.552095	NR_036530		LOC100289230	-	uncharacterized LOC100289230	ncRNA
9_siCtrl_WDR5_peak_1498	chr1	212208072	212209678	+	1204	NA	promoter-TSS (NM_015434)	promoter-TSS (NM_015434)	-20	NM_001286230	51514	Hs.656473	NM_016448	ENSG00000143476	DTL	CDT2|DCAF2|L2DTL|RAMP	denticleless E3 ubiquitin protein ligase homolog	protein-coding
9_siCtrl_WDR5_peak_12683	chr4	8442008	8442958	+	1204	NA	promoter-TSS (NM_152544)	promoter-TSS (NM_152544)	-21	NM_152544	152992	Hs.566191	NM_024950	ENSG00000155275	TRMT44	C4orf23|METTL19|TRM44	tRNA methyltransferase 44 homolog	protein-coding
9_siCtrl_WDR5_peak_8408	chr19	7694094	7695227	+	1202	NA	promoter-TSS (NM_001171155)	promoter-TSS (NM_001171155)	-19	NM_001171155	100131801	Hs.728837	NM_001171155	ENSG00000229833	PET100	C19orf79	PET100 cytochrome c oxidase chaperone	protein-coding
9_siCtrl_WDR5_peak_5965	chr15	78963808	78964634	+	1202	NA	Intergenic	Intergenic	-30669	NM_000750	1143	Hs.624178	NM_000750	ENSG00000117971	CHRNB4	-	cholinergic receptor nicotinic beta 4 subunit	protein-coding
9_siCtrl_WDR5_peak_11368	chr22	24951177	24952201	+	1202	NA	promoter-TSS (NM_001284254)	promoter-TSS (NM_001284254)	71	NR_103819	6634	Hs.356549	NM_004175	ENSG00000100028	SNRPD3	SMD3|Sm-D3	small nuclear ribonucleoprotein D3 polypeptide	protein-coding
9_siCtrl_WDR5_peak_5317	chr14	93896087	93897827	+	1202	NA	promoter-TSS (NM_001346218)	promoter-TSS (NM_001346218)	-328	NM_001346218	57578	Hs.126561	NM_020818	ENSG00000133958	UNC79	KIAA1409	unc-79 homolog, NALCN channel complex subunit	protein-coding
9_siCtrl_WDR5_peak_7548	chr17	59489669	59490824	+	1200	NA	non-coding (NR_160788, exon 1 of 1)	non-coding (NR_160788, exon 1 of 1)	1134	NR_160788	388407	Hs.434459	NM_203425		C17orf82	-	chromosome 17 open reading frame 82	ncRNA
9_siCtrl_WDR5_peak_14151	chr5	170171191	170171744	+	1199	NA	Intergenic	CpG	-39256	NM_001291985	2568	Hs.26225	NM_014211	ENSG00000094755	GABRP	-	gamma-aminobutyric acid type A receptor pi subunit	protein-coding
9_siCtrl_WDR5_peak_8086	chr18	42322564	42323438	+	1196	NA	intron (NM_001130110, intron 2 of 3)	CT-rich|Low_complexity|Low_complexity	62148	NM_015559	26040	Hs.435458	NM_015559	ENSG00000152217	SETBP1	MRD29|SEB	SET binding protein 1	protein-coding
9_siCtrl_WDR5_peak_1919	chr10	15677867	15678338	+	1196	NA	intron (NM_001291494, intron 12 of 28)	intron (NM_001291494, intron 12 of 28)	83819	NM_003638	8516	Hs.171311	NM_003638	ENSG00000077943	ITGA8	-	integrin subunit alpha 8	protein-coding
9_siCtrl_WDR5_peak_13342	chr4	190970529	190971326	+	1193	NA	Intergenic	Intergenic	-14730	NR_121644	100419743		NR_121644	ENSG00000281591	DBET	DBE-T|DUX4L30	D4Z4 binding element transcript	ncRNA
9_siCtrl_WDR5_peak_10577	chr2	240322635	240323865	+	1192	NA	promoter-TSS (NR_135576)	promoter-TSS (NR_135576)	120	NR_135575	101928111	Hs.534680	NR_135575	ENSG00000222020	HDAC4-AS1	-	HDAC4 antisense RNA 1	ncRNA
9_siCtrl_WDR5_peak_7399	chr17	48796569	48797604	+	1192	NA	5' UTR (NM_006107, exon 1 of 11)	5' UTR (NM_006107, exon 1 of 11)	122	NM_001330330	51747	Hs.130293	NM_006107	ENSG00000108848	LUC7L3	CRA|CREAP-1|CROP|LUC7A|OA48-18|hLuc7A	LUC7 like 3 pre-mRNA splicing factor	protein-coding
9_siCtrl_WDR5_peak_9070	chr19	55972608	55973619	+	1192	NA	promoter-TSS (NM_024710)	promoter-TSS (NM_024710)	-104	NM_024710	79763	Hs.467306	NM_024710	ENSG00000063241	ISOC2	-	isochorismatase domain containing 2	protein-coding
9_siCtrl_WDR5_peak_7223	chr17	40896336	40897566	+	1191	NA	intron (NM_001321082, intron 1 of 19)	CpG	107	NM_001321079	2145	Hs.194669	NM_001991	ENSG00000108799	EZH1	KMT6B	enhancer of zeste 1 polycomb repressive complex 2 subunit	protein-coding
9_siCtrl_WDR5_peak_14822	chr6	73233786	73234199	+	1190	NA	Intergenic	Intergenic	-97579	NM_001160133	56479	Hs.445324	NM_019842	ENSG00000185760	KCNQ5	Kv7.5|MRD46	potassium voltage-gated channel subfamily Q member 5	protein-coding
9_siCtrl_WDR5_peak_8432	chr19	9731595	9732522	+	1189	NA	promoter-TSS (NR_122038)	promoter-TSS (NR_122038)	-100	NR_122038	284385	Hs.651747	NM_001242812	ENSG00000267106	ZNF561-AS1	C19orf82	ZNF561 antisense RNA 1 (head to head)	ncRNA
9_siCtrl_WDR5_peak_1587	chr1	221483423	221483964	+	1187	NA	Intergenic	Intergenic	25945	NR_024236	400804	Hs.722626	NR_024236	ENSG00000234754	C1orf140	-	uncharacterized LOC400804	ncRNA
9_siCtrl_WDR5_peak_15428	chr7	4681462	4682169	+	1185	NA	Intergenic	CpG	-40111	NM_001037165	221937	Hs.487393	NM_001037165	ENSG00000164916	FOXK1	FOXK1L	forkhead box K1	protein-coding
9_siCtrl_WDR5_peak_3832	chr12	53715084	53715598	+	1185	NA	promoter-TSS (NM_001173466)	promoter-TSS (NM_001173466)	53	NM_001173466	8086	Hs.369144	NM_015665	ENSG00000094914	AAAS	AAA|AAASb|ADRACALA|ADRACALIN|ALADIN|GL003	aladin WD repeat nucleoporin	protein-coding
9_siCtrl_WDR5_peak_18173	chrX	130036622	130037537	+	1184	NA	5' UTR (NM_006375, exon 1 of 15)	5' UTR (NM_006375, exon 1 of 15)	212	NM_006375	10495	Hs.171458	NM_006375	ENSG00000165675	ENOX2	APK1|COVA1|tNOX	ecto-NOX disulfide-thiol exchanger 2	protein-coding
9_siCtrl_WDR5_peak_7842	chr17	79008296	79009090	+	1183	NA	promoter-TSS (NR_026857)	promoter-TSS (NR_026857)	-174	NR_026857	440465	Hs.448889	NM_001004336	ENSG00000226137	BAIAP2-DT	BAIAP2-AS1|lnc-BAIAP2	BAIAP2 divergent transcript	ncRNA
9_siCtrl_WDR5_peak_2487	chr10	115613637	115615131	+	1183	NA	promoter-TSS (NM_001271816)	promoter-TSS (NM_001271816)	-36	NM_198514	374354	Hs.369924	NM_198514	ENSG00000196865	NHLRC2	FINCA	NHL repeat containing 2	protein-coding
9_siCtrl_WDR5_peak_17712	chr9	127177078	127177977	+	1182	NA	intron (NM_002799, intron 1 of 7)	CpG	194	NM_002799	5695	Hs.213470	NM_002799	ENSG00000136930	PSMB7	Z	proteasome subunit beta 7	protein-coding
9_siCtrl_WDR5_peak_7323	chr17	44438383	44439721	+	1182	NA	5' UTR (NM_001103154, exon 1 of 5)	5' UTR (NM_001103154, exon 1 of 5)	101	NM_001363805	100506084	Hs.559259	NM_001039083	ENSG00000228696	ARL17B	ARL17|ARL17A	ADP ribosylation factor like GTPase 17B	protein-coding
9_siCtrl_WDR5_peak_560	chr1	68696978	68698770	+	1182	NA	intron (NM_024911, intron 1 of 11)	intron (NM_024911, intron 1 of 11)	332	NM_024911	79971	Hs.647659	NM_024911	ENSG00000116729	WLS	C1orf139|EVI|GPR177|MRP|mig-14	Wnt ligand secretion mediator	protein-coding
9_siCtrl_WDR5_peak_2650	chr11	809183	810261	+	1182	NA	promoter-TSS (NM_001004)	promoter-TSS (NM_001004)	-245	NM_001004	6181	Hs.437594	NM_001004	ENSG00000177600	RPLP2	D11S2243E|LP2|P2|RPP2	ribosomal protein lateral stalk subunit P2	protein-coding
9_siCtrl_WDR5_peak_3307	chr11	111944665	111945362	+	1182	NA	promoter-TSS (NM_138789)	promoter-TSS (NM_138789)	-10	NM_001301019	55216	Hs.195060	NM_018195	ENSG00000150776	NKAPD1	C11orf57	NKAP domain containing 1	protein-coding
9_siCtrl_WDR5_peak_10661	chr20	5093248	5094169	+	1181	NA	promoter-TSS (NM_014145)	promoter-TSS (NM_014145)	14	NM_001009923	29058	Hs.472024	NM_014145	ENSG00000089063	TMEM230	C20orf30|HSPC274|dJ1116H23.2.1	transmembrane protein 230	protein-coding
9_siCtrl_WDR5_peak_8351	chr19	4065534	4067756	+	1180	NA	intron (NM_015898, intron 1 of 2)	CpG-12573	252	NM_015898	51341	Hs.591384	NM_015898	ENSG00000178951	ZBTB7A	FBI-1|FBI1|LRF|TIP21|ZBTB7|ZNF857A|pokemon	zinc finger and BTB domain containing 7A	protein-coding
9_siCtrl_WDR5_peak_3249	chr11	95257576	95258256	+	1180	NA	Intergenic	Intergenic	265030	NM_001330357	143684	Hs.288304	NM_144664	ENSG00000077458	FAM76B	-	family with sequence similarity 76 member B	protein-coding
9_siCtrl_WDR5_peak_8467	chr19	11456608	11457286	+	1180	NA	promoter-TSS (NM_001321113)	promoter-TSS (NM_001321113)	-3	NM_001321112	374882	Hs.8036	NM_033408	ENSG00000105518	TMEM205	UNQ501	transmembrane protein 205	protein-coding
9_siCtrl_WDR5_peak_16646	chr8	41909290	41910016	+	1179	NA	promoter-TSS (NM_006766)	promoter-TSS (NM_006766)	-148	NM_006766	7994	Hs.491577	NM_006766	ENSG00000083168	KAT6A	MOZ|MRD32|MYST-3|MYST3|RUNXBP2|ZC2HC6A|ZNF220	lysine acetyltransferase 6A	protein-coding
9_siCtrl_WDR5_peak_14246	chr5	179498917	179499598	+	1176	NA	promoter-TSS (NM_001280801)	promoter-TSS (NM_001280801)	-498	NM_001280801	55819	Hs.484363	NM_018434	ENSG00000113269	RNF130	G1RZFP|GOLIATH|GP	ring finger protein 130	protein-coding
9_siCtrl_WDR5_peak_1219	chr1	174967898	174969686	+	1174	NA	promoter-TSS (NM_014412)	promoter-TSS (NM_014412)	221	NM_001007214	27101	Hs.508524	NM_014412	ENSG00000116161	CACYBP	GIG5|PNAS-107|S100A6BP|SIP	calcyclin binding protein	protein-coding
9_siCtrl_WDR5_peak_12234	chr3	126701372	126701903	+	1171	NA	Intergenic	CpG	-5800	NM_032242	5361	Hs.432329	NM_032242	ENSG00000114554	PLXNA1	NOV|NOVP|PLEXIN-A1|PLXN1	plexin A1	protein-coding
9_siCtrl_WDR5_peak_4226	chr12	109490011	109490716	+	1171	NA	promoter-TSS (NM_032663)	promoter-TSS (NM_032663)	-18	NM_032663	84749	Hs.486434	NM_032663	ENSG00000135093	USP30	-	ubiquitin specific peptidase 30	protein-coding
9_siCtrl_WDR5_peak_5370	chr14	100842082	100843162	+	1170	NA	promoter-TSS (NM_173701)	promoter-TSS (NM_173701)	42	NM_173701	7453	Hs.497599	NM_004184	ENSG00000140105	WARS	GAMMA-2|HMN9|IFI53|IFP53	tryptophanyl-tRNA synthetase	protein-coding
9_siCtrl_WDR5_peak_2315	chr10	96122238	96123121	+	1169	NA	promoter-TSS (NM_022451)	promoter-TSS (NM_022451)	17	NM_022451	64318	Hs.74899	NM_022451	ENSG00000173145	NOC3L	AD24|C10orf117|FAD24	NOC3 like DNA replication regulator	protein-coding
9_siCtrl_WDR5_peak_13770	chr5	110427602	110428509	+	1167	NA	exon (NM_139281, exon 1 of 23)	exon (NM_139281, exon 1 of 23)	185	NM_139281	134430	Hs.533237	NM_139281	ENSG00000134987	WDR36	GLC1G|TA-WDRP|TAWDRP|UTP21	WD repeat domain 36	protein-coding
9_siCtrl_WDR5_peak_10147	chr2	163332134	163332668	+	1166	NA	intron (NM_173162, intron 5 of 7)	intron (NM_173162, intron 5 of 7)	131523	NM_001330270	25801	Hs.377894	NM_012198	ENSG00000115271	GCA	GCL	grancalcin	protein-coding
9_siCtrl_WDR5_peak_13634	chr5	73349810	73350493	+	1165	NA	Intergenic	Intergenic	240780	NM_001244364	64283	Hs.482521	NM_001080479	ENSG00000214944	ARHGEF28	RGNEF|RIP2|p190RHOGEF	Rho guanine nucleotide exchange factor 28	protein-coding
9_siCtrl_WDR5_peak_14120	chr5	168214899	168215590	+	1165	NA	intron (NM_001271946, intron 11 of 35)	intron (NM_001271946, intron 11 of 35)	-19984	NR_029632	407001		NR_029632	ENSG00000207739	MIR218-2	MIRN218-2|mir-218-2	microRNA 218-2	ncRNA
9_siCtrl_WDR5_peak_16493	chr8	21999290	22000029	+	1165	NA	promoter-TSS (NM_025232)	promoter-TSS (NM_025232)	-239	NM_001316965	80346	Hs.289063	NM_025232	ENSG00000168476	REEP4	C8orf20|PP432|Yip2c	receptor accessory protein 4	protein-coding
9_siCtrl_WDR5_peak_8507	chr19	12847591	12848674	+	1163	NA	promoter-TSS (NM_004317)	promoter-TSS (NM_004317)	-179	NM_004317	439	Hs.465985	NM_004317	ENSG00000198356	GET3	ARSA-I|ARSA1|ASNA-I|ASNA1|TRC40	guided entry of tail-anchored proteins factor 3, ATPase	protein-coding
9_siCtrl_WDR5_peak_18015	chrX	49125314	49126741	+	1162	NA	promoter-TSS (NM_033215)	promoter-TSS (NM_033215)	-229	NM_001184745	89801	Hs.433652	NM_033215	ENSG00000049769	PPP1R3F	HB2E|LL0XNC01-7P3.1|R3F	protein phosphatase 1 regulatory subunit 3F	protein-coding
9_siCtrl_WDR5_peak_9364	chr2	27407593	27408441	+	1162	NA	Intergenic	MLT1L|LTR|ERVL-MaLR	-26882	NM_080592	51374	Hs.9527	NM_016085	ENSG00000138085	ATRAID	APR--3|APR-3|APR3|C2orf28|HSPC013|PRO240|p18	all-trans retinoic acid induced differentiation factor	protein-coding
9_siCtrl_WDR5_peak_6521	chr16	30933359	30935548	+	1161	NA	promoter-TSS (NM_001282351)	promoter-TSS (NM_001282351)	77	NM_001282351	54620	Hs.152149	NM_019085	ENSG00000099364	FBXL19	CXXC11|Fbl19|JHDM1C	F-box and leucine rich repeat protein 19	protein-coding
9_siCtrl_WDR5_peak_8208	chr18	61089190	61090491	+	1161	NA	promoter-TSS (NM_004869)	promoter-TSS (NM_004869)	-131	NM_004869	9525	Hs.126550	NM_004869	ENSG00000119541	VPS4B	MIG1|SKD1|SKD1B|VPS4-2	vacuolar protein sorting 4 homolog B	protein-coding
9_siCtrl_WDR5_peak_8754	chr19	37263439	37264564	+	1160	NA	promoter-TSS (NM_001294306)	promoter-TSS (NM_001294306)	-19	NM_001294306	728485	Hs.157101	NM_001294306		LOC728485	-	uncharacterized LOC728485	protein-coding
9_siCtrl_WDR5_peak_13485	chr5	41903845	41904874	+	1160	NA	promoter-TSS (NM_175921)	promoter-TSS (NM_175921)	-87	NM_175921	285636	Hs.29899	NM_175921	ENSG00000205765	C5orf51	-	chromosome 5 open reading frame 51	protein-coding
9_siCtrl_WDR5_peak_4899	chr13	113000757	113001359	+	1159	NA	Intergenic	Intergenic	-15519	NR_126345	104266956		NR_126345	ENSG00000223626	LINC01044	-	long intergenic non-protein coding RNA 1044	ncRNA
9_siCtrl_WDR5_peak_11157	chr21	32470763	32471683	+	1159	NA	Intergenic	Intergenic	-60428	NM_001099219	728299	Hs.580875	NM_001099219	ENSG00000206102	KRTAP19-8	-	keratin associated protein 19-8	protein-coding
9_siCtrl_WDR5_peak_8655	chr19	23432718	23433536	+	1158	NA	promoter-TSS (NM_001355404)	promoter-TSS (NM_001355404)	69	NM_001355405	440519	Hs.675814	NM_001355404	ENSG00000196081	ZNF724	ZNF724P	zinc finger protein 724	protein-coding
9_siCtrl_WDR5_peak_9662	chr2	65556463	65557103	+	1157	NA	intron (NM_001128210, intron 4 of 5)	intron (NM_001128210, intron 4 of 5)	37129	NM_001128210	200734	Hs.59332	NM_181784	ENSG00000198369	SPRED2	Spred-2	sprouty related EVH1 domain containing 2	protein-coding
9_siCtrl_WDR5_peak_9192	chr2	3652551	3653426	+	1155	NA	promoter-TSS (NM_001255986)	promoter-TSS (NM_001255986)	-654	NM_001255988	78989	Hs.32603	NM_024027	ENSG00000118004	COLEC11	3MC2|CL-K1-I|CL-K1-II|CL-K1-IIa|CL-K1-IIb|CLK1	collectin subfamily member 11	protein-coding
9_siCtrl_WDR5_peak_7589	chr17	62501103	62503734	+	1155	NA	promoter-TSS (NM_001320597)	promoter-TSS (NM_001320597)	-11	NM_004396	1655	Hs.279806	NM_004396	ENSG00000108654	DDX5	G17P1|HLR1|HUMP68|p68	DEAD-box helicase 5	protein-coding
9_siCtrl_WDR5_peak_17000	chr8	124408198	124409229	+	1152	NA	promoter-TSS (NM_014109)	promoter-TSS (NM_014109)	-26	NM_014109	29028	Hs.370834	NM_014109	ENSG00000156802	ATAD2	ANCCA|CT137|PRO2000	ATPase family AAA domain containing 2	protein-coding
9_siCtrl_WDR5_peak_15959	chr7	92157397	92158433	+	1151	NA	promoter-TSS (NM_001282677)	promoter-TSS (NM_001282677)	-81	NM_001282678	5189	Hs.164682	NM_000466	ENSG00000127980	PEX1	HMLR1|PBD1A|PBD1B|ZWS|ZWS1	peroxisomal biogenesis factor 1	protein-coding
9_siCtrl_WDR5_peak_7405	chr17	49012129	49012881	+	1149	NA	Intergenic	Intergenic	-67166	NM_001243877	10140	Hs.703321	NM_005749	ENSG00000141232	TOB1	APRO5|APRO6|PIG49|TOB|TROB|TROB1	transducer of ERBB2, 1	protein-coding
9_siCtrl_WDR5_peak_1750	chr1	236958156	236959500	+	1148	NA	5' UTR (NM_000254, exon 1 of 33)	5' UTR (NM_000254, exon 1 of 33)	236	NM_001291940	4548	Hs.498187	NM_000254	ENSG00000116984	MTR	HMAG|MS|cblG	5-methyltetrahydrofolate-homocysteine methyltransferase	protein-coding
9_siCtrl_WDR5_peak_13062	chr4	119606064	119607056	+	1148	NA	promoter-TSS (NM_020961)	promoter-TSS (NM_020961)	13	NM_020961	57721	Hs.596872	NM_020961	ENSG00000145388	METTL14	hMETTL14	methyltransferase like 14	protein-coding
9_siCtrl_WDR5_peak_15736	chr7	48018611	48019491	+	1147	NA	non-coding (NR_037917, exon 1 of 9)	non-coding (NR_037917, exon 1 of 9)	161	NM_004507	3364	Hs.152983	NM_004507	ENSG00000136273	HUS1	hHUS1	HUS1 checkpoint clamp component	protein-coding
9_siCtrl_WDR5_peak_13002	chr4	100484519	100485381	+	1146	NA	promoter-TSS (NM_152292)	promoter-TSS (NM_152292)	-70	NM_152292	93587	Hs.380412	NM_152292	ENSG00000145331	TRMT10A	HEL-S-88|MSSGM|MSSGM1|RG9MTD2|TRM10	tRNA methyltransferase 10A	protein-coding
9_siCtrl_WDR5_peak_4489	chr12	133532212	133533188	+	1146	NA	intron (NM_183238, intron 1 of 4)	CpG	192	NM_001164715	100289635	Hs.29698	NM_183238	ENSG00000196458	ZNF605	-	zinc finger protein 605	protein-coding
9_siCtrl_WDR5_peak_6453	chr16	28961839	28962741	+	1144	NA	promoter-TSS (NM_032815)	promoter-TSS (NM_032815)	-28	NM_032815	84901	Hs.513470	NM_032815	ENSG00000176953	NFATC2IP	ESC2|NIP45|RAD60	nuclear factor of activated T cells 2 interacting protein	protein-coding
9_siCtrl_WDR5_peak_11462	chr22	38082136	38082653	+	1144	NA	promoter-TSS (NM_024313)	promoter-TSS (NM_024313)	44	NM_024313	79159	Hs.632778	NM_024313	ENSG00000273899	NOL12	Nop25|dJ37E16.7	nucleolar protein 12	protein-coding
9_siCtrl_WDR5_peak_16118	chr7	112090384	112091489	+	1143	NA	intron (NM_001007245, intron 2 of 12)	CpG	373	NR_120333	3475	Hs.7879	NM_001550	ENSG00000006652	IFRD1	PC4|TIS7	interferon related developmental regulator 1	protein-coding
9_siCtrl_WDR5_peak_12174	chr3	119216779	119217902	+	1143	NA	promoter-TSS (NM_016589)	promoter-TSS (NM_016589)	-54	NM_016589	51300	Hs.477287	NM_016589	ENSG00000113845	TIMMDC1	C3orf1|MC1DN31	translocase of inner mitochondrial membrane domain containing 1	protein-coding
9_siCtrl_WDR5_peak_8592	chr19	17970331	17971386	+	1142	NA	intron (NM_000980, intron 1 of 4)	CpG	139	NM_000980	6142	Hs.337766	NM_000980	ENSG00000105640	RPL18A	L18A	ribosomal protein L18a	protein-coding
9_siCtrl_WDR5_peak_8567	chr19	16606725	16607455	+	1141	NA	promoter-TSS (NM_001288834)	promoter-TSS (NM_001288834)	-87	NM_145046	125972	Hs.304020	NM_145046	ENSG00000269058	CALR3	CMH19|CRT2|CT93	calreticulin 3	protein-coding
9_siCtrl_WDR5_peak_11371	chr22	25888539	25889784	+	1140	NA	Intergenic	Intergenic	37548	NR_106875	102466198		NR_106875	ENSG00000277872	MIR6817	hsa-mir-6817	microRNA 6817	ncRNA
9_siCtrl_WDR5_peak_17080	chr8	143209655	143210631	+	1138	NA	Intergenic	Intergenic	-47557	NR_039682	100616268		NR_039682	ENSG00000265247	MIR4472-1	-	microRNA 4472-1	ncRNA
9_siCtrl_WDR5_peak_2554	chr10	124739626	124740492	+	1138	NA	exon (NM_001363531, exon 1 of 6)	exon (NM_001363531, exon 1 of 6)	142	NM_001363531	118672	Hs.281004	NM_153336	ENSG00000179988	PSTK	C10orf89	phosphoseryl-tRNA kinase	protein-coding
9_siCtrl_WDR5_peak_7053	chr17	26698604	26699657	+	1138	NA	exon (NM_015077, exon 1 of 13)	exon (NM_015077, exon 1 of 13)	415	NM_015077	23098	Hs.743510	NM_015077	ENSG00000004139	SARM1	MyD88-5|SAMD2|SARM	sterile alpha and TIR motif containing 1	protein-coding
9_siCtrl_WDR5_peak_1429	chr1	206589369	206590738	+	1138	NA	intron (NM_001170637, intron 8 of 19)	intron (NM_001170637, intron 8 of 19)	32686	NR_120535	100996712	Hs.497575	NM_001271887		SRGAP2D	-	SLIT-ROBO Rho GTPase activating protein 2D (pseudogene)	pseudo
9_siCtrl_WDR5_peak_4612	chr13	39675328	39675867	+	1136	NA	Intergenic	Intergenic	63004	NM_001012754	387921	Hs.507783	NM_001012754	ENSG00000188811	NHLRC3	-	NHL repeat containing 3	protein-coding
9_siCtrl_WDR5_peak_792	chr1	110880485	110882743	+	1136	NA	promoter-TSS (NM_001201545)	promoter-TSS (NM_001201545)	179	NR_036595	440600	Hs.649375	NR_036595	ENSG00000227963	RBM15-AS1	AS-RBM15	RBM15 antisense RNA 1	ncRNA
9_siCtrl_WDR5_peak_10256	chr2	182242973	182243603	+	1136	NA	intron (NR_130784, intron 4 of 4)	intron (NR_130784, intron 4 of 4)	-72909	NR_039637	100616213		NR_039637	ENSG00000266705	MIR4437	mir-4437	microRNA 4437	ncRNA
9_siCtrl_WDR5_peak_13691	chr5	81573534	81574449	+	1135	NA	promoter-TSS (NM_001349373)	promoter-TSS (NM_001349373)	182	NM_001025	6228	Hs.527193	NM_001025	ENSG00000186468	RPS23	BTDD|MABAS|MCINS|PAMAS|S23|uS12	ribosomal protein S23	protein-coding
9_siCtrl_WDR5_peak_5172	chr14	70826013	70826854	+	1135	NA	promoter-TSS (NM_016468)	promoter-TSS (NM_016468)	-33	NM_016468	51241	Hs.709581	NM_016468	ENSG00000133983	COX16	C14orf112|HSPC203|hCOX16	cytochrome c oxidase assembly factor COX16	protein-coding
9_siCtrl_WDR5_peak_16732	chr8	66057188	66057995	+	1134	NA	Intergenic	Intergenic	34984	NR_038901	552859	Hs.156997	NR_038901	ENSG00000280725	LINC00251	C8orf25|NCRNA00251	long intergenic non-protein coding RNA 251	ncRNA
9_siCtrl_WDR5_peak_8441	chr19	10304472	10305984	+	1133	NA	intron (NM_001379, intron 1 of 39)	CpG	401	NM_001318731	1786	Hs.202672	NM_001379	ENSG00000130816	DNMT1	ADCADN|AIM|CXXC9|DNMT|HSN1E|MCMT|m.HsaI	DNA methyltransferase 1	protein-coding
9_siCtrl_WDR5_peak_14713	chr6	43139036	43139684	+	1133	NA	promoter-TSS (NM_001292001)	promoter-TSS (NM_001292001)	353	NM_003131	6722	Hs.520140	NM_003131	ENSG00000112658	SRF	MCM1	serum response factor	protein-coding
9_siCtrl_WDR5_peak_14730	chr6	44224874	44225484	+	1132	NA	promoter-TSS (NM_001286520)	promoter-TSS (NM_001286520)	86	NM_001286520	347734	Hs.182885	NM_178148	ENSG00000157593	SLC35B2	PAPST1|SLL|UGTrel4	solute carrier family 35 member B2	protein-coding
9_siCtrl_WDR5_peak_7873	chr17	79817979	79819328	+	1131	NA	promoter-TSS (NM_000918)	promoter-TSS (NM_000918)	-242	NM_000918	5034	Hs.464336	NM_000918	ENSG00000185624	P4HB	CLCRP1|DSI|ERBA2L|GIT|P4Hbeta|PDI|PDIA1|PHDB|PO4DB|PO4HB|PROHB	prolyl 4-hydroxylase subunit beta	protein-coding
9_siCtrl_WDR5_peak_7344	chr17	46018307	46019425	+	1131	NA	promoter-TSS (NR_103856)	promoter-TSS (NR_103856)	-71	NM_018129	55163	Hs.631742	NM_018129	ENSG00000108439	PNPO	HEL-S-302|PDXPO	pyridoxamine 5'-phosphate oxidase	protein-coding
9_siCtrl_WDR5_peak_11792	chr3	38065666	38066564	+	1127	NA	promoter-TSS (NM_001130964)	promoter-TSS (NM_001130964)	-104	NM_001130964	5333	Hs.80776	NM_006225	ENSG00000187091	PLCD1	NDNC3|PLC-III	phospholipase C delta 1	protein-coding
9_siCtrl_WDR5_peak_1599	chr1	222885498	222887088	+	1127	NA	promoter-TSS (NM_001288580)	promoter-TSS (NM_001288580)	-370	NM_001288580	148362	Hs.534965	NM_144695	ENSG00000162819	BROX	C1orf58	BRO1 domain and CAAX motif containing	protein-coding
9_siCtrl_WDR5_peak_1432	chr1	206785442	206785980	+	1126	NA	5' UTR (NM_001201478, exon 1 of 13)	5' UTR (NM_001201478, exon 1 of 13)	107	NM_006893	1939	Hs.497581	NM_006893	ENSG00000143486	EIF2D	HCA56|LGTN	eukaryotic translation initiation factor 2D	protein-coding
9_siCtrl_WDR5_peak_9852	chr2	96874085	96875051	+	1126	NA	promoter-TSS (NM_020151)	promoter-TSS (NM_020151)	5	NM_020151	56910	Hs.469331	NM_020151	ENSG00000084090	STARD7	GTT1	StAR related lipid transfer domain containing 7	protein-coding
9_siCtrl_WDR5_peak_7882	chr17	79935266	79936067	+	1125	NA	intron (NR_045351, intron 1 of 14)	CpG	161	NM_001330528	79058	Hs.298351	NM_024083	ENSG00000169696	ASPSCR1	ASPCR1|ASPL|ASPS|RCC17|TUG|UBXD9|UBXN9	ASPSCR1 tether for SLC2A4, UBX domain containing	protein-coding
9_siCtrl_WDR5_peak_8832	chr19	41815960	41816577	+	1124	NA	promoter-TSS (NM_001346100)	promoter-TSS (NM_001346100)	-114	NM_001346100	90324	Hs.437497	NM_052848	ENSG00000142039	CCDC97	-	coiled-coil domain containing 97	protein-coding
9_siCtrl_WDR5_peak_6379	chr16	19940241	19941150	+	1123	NA	Intergenic	Intergenic	-43739	NM_001304771	51704	Hs.148685	NM_016235	ENSG00000167191	GPRC5B	RAIG-2|RAIG2	G protein-coupled receptor class C group 5 member B	protein-coding
9_siCtrl_WDR5_peak_4400	chr12	124196381	124197468	+	1123	NA	promoter-TSS (NM_012463)	promoter-TSS (NM_012463)	24	NM_012463	23545	Hs.25786	NM_012463	ENSG00000185344	ATP6V0A2	A2|ARCL|ARCL2A|ATP6A2|ATP6N1D|J6B7|RTF|STV1|TJ6|TJ6M|TJ6S|VPH1|WSS	ATPase H+ transporting V0 subunit a2	protein-coding
9_siCtrl_WDR5_peak_3561	chr12	12419363	12420584	+	1123	NA	promoter-TSS (NM_002336)	promoter-TSS (NM_002336)	5	NM_002336	4040	Hs.584775	NM_002336	ENSG00000070018	LRP6	ADCAD2|STHAG7	LDL receptor related protein 6	protein-coding
9_siCtrl_WDR5_peak_6885	chr17	6543430	6544711	+	1123	NA	promoter-TSS (NM_014804)	promoter-TSS (NM_014804)	-39	NR_147088	9851	Hs.28070	NM_014804	ENSG00000198920	KIAA0753	MNR|OFIP	KIAA0753	protein-coding
9_siCtrl_WDR5_peak_16536	chr8	26893633	26894285	+	1121	NA	Intergenic	Intergenic	12521	NR_031680	100313884		NR_031680	ENSG00000221616	MIR548H4	MIR548H-4|MIRN548H4|hsa-mir-548h-4	microRNA 548h-4	ncRNA
9_siCtrl_WDR5_peak_12391	chr3	157776358	157776967	+	1121	NA	Intergenic	Intergenic	47290	NM_003030	6474	Hs.55967	NM_003030	ENSG00000168779	SHOX2	OG12|OG12X|SHOT	short stature homeobox 2	protein-coding
9_siCtrl_WDR5_peak_18071	chrX	71792239	71793093	+	1121	NA	promoter-TSS (NM_018486)	promoter-TSS (NM_018486)	27	NM_001166422	55869	Hs.310536	NM_018486	ENSG00000147099	HDAC8	CDA07|CDLS5|HD8|HDACL1|KDAC8|MRXS6|RPD3|WTS	histone deacetylase 8	protein-coding
9_siCtrl_WDR5_peak_10634	chr20	2489210	2490087	+	1120	NA	promoter-TSS (NM_001282496)	promoter-TSS (NM_001282496)	-87	NM_001321800	79175	Hs.516846	NM_024325	ENSG00000088876	ZNF343	dJ734P14.5	zinc finger protein 343	protein-coding
9_siCtrl_WDR5_peak_7195	chr17	38803483	38804852	+	1120	NA	promoter-TSS (NM_003079)	promoter-TSS (NM_003079)	-97	NM_003079	6605	Hs.743978	NM_003079	ENSG00000073584	SMARCE1	BAF57|CSS5	SWI/SNF related, matrix associated, actin dependent regulator of chromatin, subfamily e, member 1	protein-coding
9_siCtrl_WDR5_peak_2481	chr10	114737019	114737628	+	1119	NA	intron (NM_001363501, intron 4 of 13)	intron (NM_001363501, intron 4 of 13)	27314	NM_001146285	6934	Hs.593995	NM_030756	ENSG00000148737	TCF7L2	TCF-4|TCF4	transcription factor 7 like 2	protein-coding
9_siCtrl_WDR5_peak_11227	chr21	42427209	42427898	+	1119	NA	Intergenic	Intergenic	92438	NR_024100	284835	Hs.106234	NR_024100	ENSG00000226496	LINC00323	C21orf130|NCRNA00323|PRED42	long intergenic non-protein coding RNA 323	ncRNA
9_siCtrl_WDR5_peak_5594	chr15	44580196	44581482	+	1117	NA	promoter-TSS (NR_157849)	promoter-TSS (NR_157849)	-78	NR_157849	113201	Hs.512867	NM_138423	ENSG00000166734	CASC4	H63	cancer susceptibility 4	protein-coding
9_siCtrl_WDR5_peak_11097	chr20	62587202	62588195	+	1117	NA	promoter-TSS (NR_148442)	promoter-TSS (NR_148442)	71	NR_148437	54963	Hs.504998	NM_017859	ENSG00000198276	UCKL1	UCK1L|URKL1	uridine-cytidine kinase 1 like 1	protein-coding
9_siCtrl_WDR5_peak_11012	chr20	50807572	50809086	+	1117	NA	promoter-TSS (NM_022088)	promoter-TSS (NM_022088)	-11	NM_022088	55734	Hs.473082	NM_018197	ENSG00000020256	ZFP64	ZNF338	ZFP64 zinc finger protein	protein-coding
9_siCtrl_WDR5_peak_14805	chr6	70294840	70295623	+	1116	NA	Intergenic	Intergenic	211127	NM_001363722	55788	Hs.271643	NM_018368	ENSG00000168216	LMBRD1	C6orf209|LMBD1|MAHCF|NESI	LMBR1 domain containing 1	protein-coding
9_siCtrl_WDR5_peak_10638	chr20	2644435	2645155	+	1115	NA	promoter-TSS (NM_006899)	promoter-TSS (NM_006899)	67	NR_136344	3420	Hs.436405	NM_006899	ENSG00000101365	IDH3B	RP46	isocitrate dehydrogenase (NAD(+)) 3 beta	protein-coding
9_siCtrl_WDR5_peak_8596	chr19	18168725	18169734	+	1115	NA	TTS (NM_001290024)	TTS (NM_001290024)	28515	NM_153701	3594	Hs.567294	NM_005535	ENSG00000096996	IL12RB1	CD212|IL-12R-BETA1|IL12RB|IMD30	interleukin 12 receptor subunit beta 1	protein-coding
9_siCtrl_WDR5_peak_9705	chr2	70417526	70418290	+	1115	NA	promoter-TSS (NM_001348758)	promoter-TSS (NM_001348758)	-65	NM_001348763	54980	Hs.720049	NM_017880	ENSG00000115998	C2orf42	-	chromosome 2 open reading frame 42	protein-coding
9_siCtrl_WDR5_peak_5210	chr14	75530016	75531121	+	1114	NA	intron (NM_001302617, intron 1 of 2)	intron (NM_001302617, intron 1 of 2)	159	NM_001107	97	Hs.18573	NM_001107	ENSG00000119640	ACYP1	ACYPE	acylphosphatase 1	protein-coding
9_siCtrl_WDR5_peak_991	chr1	153894592	153896302	+	1113	NA	promoter-TSS (NM_020699)	promoter-TSS (NM_020699)	1	NM_020699	57459	Hs.4779	NM_020699	ENSG00000143614	GATAD2B	MRD18|P66beta|p68	GATA zinc finger domain containing 2B	protein-coding
9_siCtrl_WDR5_peak_1793	chr1	244137629	244138606	+	1112	NA	intron (NR_033883, intron 1 of 11)	intron (NR_033883, intron 1 of 11)	57413	NR_033883	339529	Hs.209374	NR_033883	ENSG00000226828	LINC02774	-	long intergenic non-protein coding RNA 2774	ncRNA
9_siCtrl_WDR5_peak_14751	chr6	51417832	51418525	+	1112	NA	Intergenic	Intergenic	-68490	NR_125840	101927082	Hs.730296	NR_125840		LOC101927082	-	uncharacterized LOC101927082	ncRNA
9_siCtrl_WDR5_peak_9071	chr19	55987402	55988583	+	1112	NA	promoter-TSS (NM_033113)	promoter-TSS (NM_033113)	8	NM_033113	89887	Hs.525209	NM_033113	ENSG00000197483	ZNF628	ZEC|Zfp628	zinc finger protein 628	protein-coding
9_siCtrl_WDR5_peak_9102	chr19	57751635	57752428	+	1112	NA	promoter-TSS (NM_001145078)	promoter-TSS (NM_001145078)	31	NM_001023563	390980	Hs.22488	NM_001023563	ENSG00000204524	ZNF805	-	zinc finger protein 805	protein-coding
9_siCtrl_WDR5_peak_4810	chr13	95253431	95254776	+	1111	NA	promoter-TSS (NM_180989)	promoter-TSS (NM_180989)	-8	NM_180989	160897	Hs.439363	NM_180989	ENSG00000152749	GPR180	ITR	G protein-coupled receptor 180	protein-coding
9_siCtrl_WDR5_peak_6476	chr16	29984360	29984904	+	1111	NA	promoter-TSS (NM_001252043)	promoter-TSS (NM_001252043)	-557	NM_001252043	9344	Hs.291623	NM_004783	ENSG00000149930	TAOK2	MAP3K17|PSK|PSK1|PSK1-BETA|TAO1|TAO2	TAO kinase 2	protein-coding
9_siCtrl_WDR5_peak_487	chr1	61543442	61544029	+	1111	NA	intron (NM_001145511, intron 1 of 10)	intron (NM_001145511, intron 1 of 10)	836	NM_001145511	4774	Hs.740757	NM_005595	ENSG00000162599	NFIA	BRMUTD|CTF|NF-I/A|NF1-A|NFI-A|NFI-L	nuclear factor I A	protein-coding
9_siCtrl_WDR5_peak_6206	chr16	1401574	1402322	+	1109	NA	promoter-TSS (NM_032520)	promoter-TSS (NM_032520)	16	NM_032520	84572	Hs.241575	NM_032520	ENSG00000090581	GNPTG	C16orf27|GNPTAG|LP2537|RJD9	N-acetylglucosamine-1-phosphate transferase subunit gamma	protein-coding
9_siCtrl_WDR5_peak_5618	chr15	46570219	46570842	+	1108	NA	Intergenic	Intergenic	573137	NR_135680	105370802	Hs.447522	NR_135680	ENSG00000259200	LOC105370802	-	uncharacterized LOC105370802	ncRNA
9_siCtrl_WDR5_peak_12802	chr4	45065341	45066127	+	1107	NA	Intergenic	Intergenic	-337083	NM_001270880	132789	Hs.21398	NM_138335	ENSG00000163281	GNPDA2	GNP2|SB52	glucosamine-6-phosphate deaminase 2	protein-coding
9_siCtrl_WDR5_peak_2728	chr11	12821749	12823025	+	1107	NA	intron (NM_021961, intron 3 of 12)	L2b|LINE|L2	126419	NM_021961	7003	Hs.655331	NM_021961	ENSG00000187079	TEAD1	AA|NTEF-1|REF1|TCF-13|TCF13|TEAD-1|TEF-1	TEA domain transcription factor 1	protein-coding
9_siCtrl_WDR5_peak_15830	chr7	69837650	69838262	+	1107	NA	intron (NM_015570, intron 4 of 18)	intron (NM_015570, intron 4 of 18)	-759174	NM_022479	64409	Hs.488591	NM_022479	ENSG00000185274	GALNT17	GALNACT17|GALNT16|GALNT20|GALNTL3|GalNAc-T17|GalNAc-T19|GalNAc-T5L|WBSCR17	polypeptide N-acetylgalactosaminyltransferase 17	protein-coding
9_siCtrl_WDR5_peak_2910	chr11	47600226	47600874	+	1105	NA	promoter-TSS (NM_001318716)	promoter-TSS (NM_001318716)	17	NM_001318720	55709	Hs.718483	NM_016506	ENSG00000123444	KBTBD4	BKLHD4|HSPC252	kelch repeat and BTB domain containing 4	protein-coding
9_siCtrl_WDR5_peak_16269	chr7	140714133	140715084	+	1104	NA	promoter-TSS (NM_016071)	promoter-TSS (NM_016071)	-129	NM_016071	51650	Hs.416207	NM_016071	ENSG00000090263	MRPS33	CGI-139|MRP-S33|PTD003|S33mt	mitochondrial ribosomal protein S33	protein-coding
9_siCtrl_WDR5_peak_10959	chr20	47025724	47026610	+	1104	NA	Intergenic	Intergenic	37513	NR_026958	284749	Hs.299080	NR_026958	ENSG00000235621	LINC00494	-	long intergenic non-protein coding RNA 494	ncRNA
9_siCtrl_WDR5_peak_14902	chr6	90927935	90929678	+	1103	NA	intron (NM_001170794, intron 1 of 6)	intron (NM_001170794, intron 1 of 6)	77756	NM_021813	60468	Hs.269764	NM_021813	ENSG00000112182	BACH2	BTBD25|IMD60	BTB domain and CNC homolog 2	protein-coding
9_siCtrl_WDR5_peak_14838	chr6	80246395	80247731	+	1103	NA	promoter-TSS (NM_181714)	promoter-TSS (NM_181714)	84	NM_001122769	167691	Hs.21945	NM_181714	ENSG00000135338	LCA5	C6orf152	lebercilin LCA5	protein-coding
9_siCtrl_WDR5_peak_1274	chr1	182602746	182603306	+	1102	NA	Intergenic	Intergenic	18751	NR_036490	284648	Hs.253475	NR_036490	ENSG00000261504	LINC01686	-	long intergenic non-protein coding RNA 1686	ncRNA
9_siCtrl_WDR5_peak_7887	chr17	80055321	80057314	+	1102	NA	promoter-TSS (NM_004104)	promoter-TSS (NM_004104)	-205	NM_004104	2194	Hs.83190	NM_004104	ENSG00000169710	FASN	FAS|OA-519|SDR27X1	fatty acid synthase	protein-coding
9_siCtrl_WDR5_peak_7414	chr17	49879292	49880726	+	1102	NA	intron (NM_001082533, intron 4 of 9)	intron (NM_001082533, intron 4 of 9)	356065	NM_020178	56934	Hs.463466	NM_020178	ENSG00000154975	CA10	CA-RPX|CARPX|HUCEP-15	carbonic anhydrase 10	protein-coding
9_siCtrl_WDR5_peak_5863	chr15	71145563	71146468	+	1101	NA	5' UTR (NM_001286679, exon 1 of 3)	5' UTR (NM_001286679, exon 1 of 3)	142	NM_001286679	55323	Hs.416755	NM_018357	ENSG00000166173	LARP6	ACHN	La ribonucleoprotein domain family member 6	protein-coding
9_siCtrl_WDR5_peak_3128	chr11	72145188	72145873	+	1101	NA	promoter-TSS (NM_001258392)	promoter-TSS (NM_001258392)	45	NM_001258393	81570	Hs.523877	NM_030813	ENSG00000162129	CLPB	ANKCLB|HSP78|MEGCANN|MGCA7|SKD3	ClpB homolog, mitochondrial AAA ATPase chaperonin	protein-coding
9_siCtrl_WDR5_peak_3083	chr11	67250514	67251234	+	1100	NA	promoter-TSS (NM_001302959)	promoter-TSS (NM_001302959)	-113	NM_001302959	9049	Hs.412433	NM_003977	ENSG00000110711	AIP	ARA9|FKBP16|FKBP37|PITA1|SMTPHN|XAP-2|XAP2	aryl hydrocarbon receptor interacting protein	protein-coding
9_siCtrl_WDR5_peak_7268	chr17	42264142	42264783	+	1100	NA	promoter-TSS (NR_148390)	promoter-TSS (NR_148390)	-109	NM_001353182	79089	Hs.181391	NM_024107	ENSG00000168591	TMUB2	FP2653	transmembrane and ubiquitin like domain containing 2	protein-coding
9_siCtrl_WDR5_peak_10504	chr2	224821980	224822619	+	1100	NA	exon (NM_022915, exon 1 of 4)	exon (NM_022915, exon 1 of 4)	119	NM_022915	65080	Hs.203559	NM_022915	ENSG00000135900	MRPL44	COXPD16|L44MT|MRP-L44	mitochondrial ribosomal protein L44	protein-coding
9_siCtrl_WDR5_peak_16375	chr7	156742103	156743015	+	1098	NA	exon (NM_138400, exon 1 of 11)	exon (NM_138400, exon 1 of 11)	153	NM_001353366	64434	Hs.15825	NM_138400	ENSG00000146909	NOM1	C7orf3|PPP1R113|SGD1	nucleolar protein with MIF4G domain 1	protein-coding
9_siCtrl_WDR5_peak_1891	chr10	13021986	13023177	+	1097	NA	intron (NM_001282658, intron 6 of 6)	intron (NM_001282658, intron 6 of 6)	21132	NM_031455	83643	Hs.498720	NM_031455	ENSG00000151468	CCDC3	-	coiled-coil domain containing 3	protein-coding
9_siCtrl_WDR5_peak_7656	chr17	70470824	70471297	+	1094	NA	intron (NR_137281, intron 1 of 4)	intron (NR_137281, intron 1 of 4)	117883	NR_152515	100499467	Hs.157726	NR_036488	ENSG00000227036	LINC00673	ERRLR01|HI-LNC75|HILNC75|LUCAIR1|SLNCR|SLNCR1	long intergenic non-protein coding RNA 673	ncRNA
9_siCtrl_WDR5_peak_3313	chr11	112481951	112482882	+	1093	NA	Intergenic	Intergenic	-55891	NR_104155	387810	Hs.512255	NR_104155	ENSG00000255484	LINC02764	-	long intergenic non-protein coding RNA 2764	ncRNA
9_siCtrl_WDR5_peak_7935	chr18	3261387	3262375	+	1092	NA	promoter-TSS (NM_033546)	promoter-TSS (NM_033546)	-65	NR_130143	104968399	Hs.464472	NR_130143	ENSG00000264235	LOC104968399	-	uncharacterized LOC104968399	ncRNA
9_siCtrl_WDR5_peak_1374	chr1	202317467	202318110	+	1092	NA	promoter-TSS (NM_001167857)	promoter-TSS (NM_001167857)	-39	NM_002481	4660	Hs.444403	NM_002481	ENSG00000077157	PPP1R12B	MYPT2|PP1bp55	protein phosphatase 1 regulatory subunit 12B	protein-coding
9_siCtrl_WDR5_peak_12140	chr3	111697214	111698327	+	1091	NA	promoter-TSS (NM_001272069)	promoter-TSS (NM_001272069)	-103	NM_001272069	55347	Hs.477115	NM_018394	ENSG00000144827	ABHD10	-	abhydrolase domain containing 10	protein-coding
9_siCtrl_WDR5_peak_9103	chr19	57791083	57792458	+	1090	NA	promoter-TSS (NR_136528)	promoter-TSS (NR_136528)	-68	NR_136528	105372476	Hs.341780	NR_136528	ENSG00000267871	ZNF460-AS1	-	ZNF460 antisense RNA 1	ncRNA
9_siCtrl_WDR5_peak_4623	chr13	41344922	41345581	+	1090	NA	promoter-TSS (NM_005830)	promoter-TSS (NM_005830)	75	NM_005830	10240	Hs.596607	NM_005830	ENSG00000102738	MRPS31	IMOGN38|MRP-S31|S31mt	mitochondrial ribosomal protein S31	protein-coding
9_siCtrl_WDR5_peak_9242	chr2	9770039	9771653	+	1088	NA	intron (NM_006826, intron 1 of 5)	CpG-14702	280	NM_006826	10971	Hs.74405	NM_006826	ENSG00000134308	YWHAQ	14-3-3|1C5|HS1	tyrosine 3-monooxygenase/tryptophan 5-monooxygenase activation protein theta	protein-coding
9_siCtrl_WDR5_peak_8691	chr19	32836363	32837211	+	1088	NA	intron (NM_014910, intron 1 of 5)	CpG	271	NM_001136156	22847	Hs.205392	NM_014910	ENSG00000168813	ZNF507	-	zinc finger protein 507	protein-coding
9_siCtrl_WDR5_peak_2976	chr11	62493993	62496414	+	1088	NA	promoter-TSS (NR_037946)	promoter-TSS (NR_037946)	-274	NM_001079559	221092	Hs.657058	NM_001079559	ENSG00000214753	HNRNPUL2	HNRPUL2|SAF-A2	heterogeneous nuclear ribonucleoprotein U like 2	protein-coding
9_siCtrl_WDR5_peak_10253	chr2	180871400	180872281	+	1088	NA	5' UTR (NM_020943, exon 1 of 20)	5' UTR (NM_020943, exon 1 of 20)	184	NM_020943	57703	Hs.311363	NM_020943	ENSG00000163510	CWC22	EIF4GL|NCM|fSAPb	CWC22 spliceosome associated protein homolog	protein-coding
9_siCtrl_WDR5_peak_13118	chr4	140477634	140478664	+	1087	NA	promoter-TSS (NM_030648)	promoter-TSS (NM_030648)	-226	NM_001306200	80854	Hs.480792	NM_030648	ENSG00000145391	SETD7	KMT7|SET7|SET7/9|SET9	SET domain containing 7, histone lysine methyltransferase	protein-coding
9_siCtrl_WDR5_peak_1240	chr1	179197937	179198830	+	1087	NA	exon (NM_007314, exon 1 of 12)	exon (NM_007314, exon 1 of 12)	429	NM_001168236	27	Hs.159472	NM_005158	ENSG00000143322	ABL2	ABLL|ARG	ABL proto-oncogene 2, non-receptor tyrosine kinase	protein-coding
9_siCtrl_WDR5_peak_3611	chr12	21653955	21654954	+	1087	NA	promoter-TSS (NM_016072)	promoter-TSS (NM_016072)	115	NM_002907	5965	Hs.235069	NM_002907	ENSG00000004700	RECQL	RECQL1|RecQ1	RecQ like helicase	protein-coding
9_siCtrl_WDR5_peak_4378	chr12	122750563	122751592	+	1087	NA	promoter-TSS (NM_001351019)	promoter-TSS (NM_001351019)	-36	NM_001351021	65082	Hs.487883	NM_022916	ENSG00000139719	VPS33A	MPSPS	VPS33A core subunit of CORVET and HOPS complexes	protein-coding
9_siCtrl_WDR5_peak_6981	chr17	16283412	16284930	+	1085	NA	promoter-TSS (NM_018955)	promoter-TSS (NM_018955)	64	NM_001281716	7314	Hs.356190	NM_018955	ENSG00000170315	UBB	HEL-S-50	ubiquitin B	protein-coding
9_siCtrl_WDR5_peak_3374	chr11	118972295	118973244	+	1084	NA	promoter-TSS (NM_001382)	promoter-TSS (NM_001382)	-206	NM_001382	1798	Hs.524081	NM_001382	ENSG00000172269	DPAGT1	ALG7|CDG-Ij|CDG1J|CMS13|CMSTA2|D11S366|DGPT|DPAGT|DPAGT2|G1PT|GPT|UAGT|UGAT	dolichyl-phosphate N-acetylglucosaminephosphotransferase 1	protein-coding
9_siCtrl_WDR5_peak_13344	chr5	9859	11967	+	1083	NA	Intergenic	(CCCTAA)n|Simple_repeat|Simple_repeat	-81370	NM_052909	153478	Hs.535800	NM_052909	ENSG00000153404	PLEKHG4B	-	pleckstrin homology and RhoGEF domain containing G4B	protein-coding
9_siCtrl_WDR5_peak_14621	chr6	34724452	34725701	+	1083	NA	promoter-TSS (NM_003093)	promoter-TSS (NM_003093)	205	NR_029472	6631	Hs.1063	NM_003093	ENSG00000124562	SNRPC	U1C|Yhc1	small nuclear ribonucleoprotein polypeptide C	protein-coding
9_siCtrl_WDR5_peak_5836	chr15	70283441	70283935	+	1083	NA	Intergenic	Intergenic	88119	NR_030714	693214		NR_030714	ENSG00000207965	MIR629	MIRN629|hsa-mir-629|mir-629	microRNA 629	ncRNA
9_siCtrl_WDR5_peak_11309	chr22	19434787	19435797	+	1081	NA	exon (NM_173793, exon 1 of 3)	exon (NM_173793, exon 1 of 3)	463	NM_173793	128977	Hs.659565	NM_173793	ENSG00000242259	C22orf39	-	chromosome 22 open reading frame 39	protein-coding
9_siCtrl_WDR5_peak_11456	chr22	37171604	37172680	+	1080	NA	promoter-TSS (NR_033531)	promoter-TSS (NR_033531)	21	NM_001363003	11020	Hs.415172	NM_006860	ENSG00000100360	IFT27	BBS19|RABL4|RAYL	intraflagellar transport 27	protein-coding
9_siCtrl_WDR5_peak_15718	chr7	44645926	44646963	+	1079	NA	intron (NM_001165036, intron 1 of 22)	CpG	218	NM_002541	4967	Hs.488181	NM_002541	ENSG00000105953	OGDH	AKGDH|E1k|OGDC	oxoglutarate dehydrogenase	protein-coding
9_siCtrl_WDR5_peak_5913	chr15	75165199	75165802	+	1079	NA	intron (NM_005697, intron 1 of 8)	CpG	206	NM_005697	10066	Hs.458917	NM_005697	ENSG00000140497	SCAMP2	-	secretory carrier membrane protein 2	protein-coding
9_siCtrl_WDR5_peak_8272	chr19	796956	798195	+	1079	NA	intron (NM_002819, intron 1 of 14)	CpG	123	NM_002819	5725	Hs.172550	NM_002819	ENSG00000011304	PTBP1	HNRNP-I|HNRNPI|HNRPI|PTB|PTB-1|PTB-T|PTB2|PTB3|PTB4|pPTB	polypyrimidine tract binding protein 1	protein-coding
9_siCtrl_WDR5_peak_15145	chr6	131948805	131949606	+	1079	NA	5' UTR (NM_001270521, exon 1 of 30)	5' UTR (NM_001270521, exon 1 of 30)	177	NM_001270522	9439	Hs.29679	NM_004830	ENSG00000112282	MED23	ARC130|CRSP130|CRSP133|CRSP3|DRIP130|MRT18|SUR-2|SUR2	mediator complex subunit 23	protein-coding
9_siCtrl_WDR5_peak_7198	chr17	39942664	39943531	+	1077	NA	promoter-TSS (NM_001352774)	promoter-TSS (NM_001352774)	-77	NM_001352774	3728	Hs.514174	NM_002230	ENSG00000173801	JUP	CTNNG|DP3|DPIII|PDGB|PKGB	junction plakoglobin	protein-coding
9_siCtrl_WDR5_peak_17939	chrX	19470080	19470613	+	1077	NA	intron (NM_001001671, intron 6 of 28)	(GAGAA)n|Simple_repeat|Simple_repeat	63033	NM_001001671	389840	Hs.713701	NM_001001671	ENSG00000180815	MAP3K15	ASK3|bA723P2.3	mitogen-activated protein kinase kinase kinase 15	protein-coding
9_siCtrl_WDR5_peak_12930	chr4	82087050	82087482	+	1077	NA	intron (NR_125908, intron 1 of 4)	intron (NR_125908, intron 1 of 4)	1172	NR_125908	101928942	Hs.664002	NR_125908	ENSG00000251059	LOC101928942	-	uncharacterized LOC101928942	ncRNA
9_siCtrl_WDR5_peak_14875	chr6	88299311	88300236	+	1073	NA	promoter-TSS (NM_001350505)	promoter-TSS (NM_001350505)	-12	NM_181837	23595	Hs.410228	NM_012381	ENSG00000135336	ORC3	LAT|LATHEO|ORC3L	origin recognition complex subunit 3	protein-coding
9_siCtrl_WDR5_peak_1691	chr1	231114052	231115307	+	1073	NA	promoter-TSS (NM_001122835)	promoter-TSS (NM_001122835)	-72	NM_024525	79573	Hs.424788	NM_024525	ENSG00000143643	TTC13	-	tetratricopeptide repeat domain 13	protein-coding
9_siCtrl_WDR5_peak_1106	chr1	161123520	161124229	+	1073	NA	exon (NM_016406, exon 1 of 6)	exon (NM_016406, exon 1 of 6)	106	NM_016406	51506	Hs.301412	NM_016406	ENSG00000143222	UFC1	HSPC155|NEDSG	ubiquitin-fold modifier conjugating enzyme 1	protein-coding
9_siCtrl_WDR5_peak_17265	chr9	26946773	26947783	+	1073	NA	promoter-TSS (NM_001031689)	promoter-TSS (NM_001031689)	-20	NM_001099222	80173	Hs.145402	NM_025103	ENSG00000096872	IFT74	BBS20|CCDC2|CMG-1|CMG1	intraflagellar transport 74	protein-coding
9_siCtrl_WDR5_peak_9065	chr19	55850701	55851520	+	1073	NA	promoter-TSS (NM_032701)	promoter-TSS (NM_032701)	-134	NM_032701	84787	Hs.590982	NM_032701	ENSG00000133247	KMT5C	SUV420H2|Suv4-20h2	lysine methyltransferase 5C	protein-coding
9_siCtrl_WDR5_peak_15765	chr7	56173827	56174676	+	1073	NA	promoter-TSS (NM_016139)	promoter-TSS (NM_016139)	72	NM_001320327	51142	Hs.389996	NM_016139	ENSG00000106153	CHCHD2	C7orf17|MIX17B|MNRR1|NS2TP|PARK22	coiled-coil-helix-coiled-coil-helix domain containing 2	protein-coding
9_siCtrl_WDR5_peak_4537	chr13	26795480	26797093	+	1071	NA	promoter-TSS (NM_183044)	promoter-TSS (NM_183044)	165	NM_005977	6049	Hs.136885	NM_005977	ENSG00000127870	RNF6	-	ring finger protein 6	protein-coding
9_siCtrl_WDR5_peak_993	chr1	153930735	153931409	+	1070	NA	promoter-TSS (NM_181715)	promoter-TSS (NM_181715)	16	NM_181715	200186	Hs.406392	NM_181715	ENSG00000160741	CRTC2	TORC-2|TORC2	CREB regulated transcription coactivator 2	protein-coding
9_siCtrl_WDR5_peak_8233	chr18	71958969	71959889	+	1070	NA	promoter-TSS (NM_001914)	promoter-TSS (NM_001914)	-231	NM_148923	1528	Hs.465413	NM_001914	ENSG00000166347	CYB5A	CYB5|MCB5|METAG	cytochrome b5 type A	protein-coding
9_siCtrl_WDR5_peak_2393	chr10	103245548	103246327	+	1070	NA	intron (NM_003939, intron 3 of 13)	intron (NM_003939, intron 3 of 13)	102077	NM_001174084	27343	Hs.523230	NM_013274	ENSG00000166169	POLL	BETAN|POLKAPPA	DNA polymerase lambda	protein-coding
9_siCtrl_WDR5_peak_8846	chr19	42746210	42747492	+	1070	NA	promoter-TSS (NM_019884)	promoter-TSS (NM_019884)	-97	NM_019884	2931	Hs.466828	NM_019884	ENSG00000105723	GSK3A	-	glycogen synthase kinase 3 alpha	protein-coding
9_siCtrl_WDR5_peak_6709	chr16	70473031	70473453	+	1070	NA	promoter-TSS (NM_006927)	promoter-TSS (NM_006927)	-239	NM_006927	6483	Hs.368611	NM_006927	ENSG00000157350	ST3GAL2	Gal-NAc6S|SIAT4B|ST3GALII|ST3GalA.2	ST3 beta-galactoside alpha-2,3-sialyltransferase 2	protein-coding
9_siCtrl_WDR5_peak_5874	chr15	72928924	72929897	+	1070	NA	promoter-TSS (NR_135684)	promoter-TSS (NR_135684)	-114	NR_135685	102723640	Hs.154829	NR_135684	ENSG00000259783	LINC02259	-	long intergenic non-protein coding RNA 2259	ncRNA
9_siCtrl_WDR5_peak_13287	chr4	175204183	175205491	+	1069	NA	promoter-TSS (NM_001145314)	promoter-TSS (NM_001145314)	-218	NM_001145314	80817	Hs.555989	NM_030633	ENSG00000164118	CEP44	KIAA1712|PS1TP3	centrosomal protein 44	protein-coding
9_siCtrl_WDR5_peak_6675	chr16	67840156	67841018	+	1068	NA	promoter-TSS (NM_001320240)	promoter-TSS (NM_001320240)	-124	NM_020850	57610	Hs.368569	NM_020850	ENSG00000141084	RANBP10	-	RAN binding protein 10	protein-coding
9_siCtrl_WDR5_peak_10340	chr2	201828005	201828924	+	1068	NA	promoter-TSS (NR_033915)	promoter-TSS (NR_033915)	-81	NM_006190	4999	Hs.444870	NM_006190	ENSG00000115942	ORC2	ORC2L	origin recognition complex subunit 2	protein-coding
9_siCtrl_WDR5_peak_17056	chr8	135961388	135962184	+	1067	NA	Intergenic	Intergenic	99608	NR_125427	101927845	Hs.559609	NR_125427	ENSG00000251218	LOC101927845	-	uncharacterized LOC101927845	ncRNA
9_siCtrl_WDR5_peak_10189	chr2	172864626	172865312	+	1067	NA	intron (NM_001322279, intron 1 of 9)	CpG	109	NM_199227	254042	Hs.298250	NM_199227	ENSG00000172878	METAP1D	MAP 1D|MAP1D|MetAP 1D|Metap1l	methionyl aminopeptidase type 1D, mitochondrial	protein-coding
9_siCtrl_WDR5_peak_17812	chr9	134000486	134001648	+	1067	NA	promoter-TSS (NM_005085)	promoter-TSS (NM_005085)	94	NM_001318324	8021	Hs.654530	NM_005085	ENSG00000126883	NUP214	CAIN|CAN	nucleoporin 214	protein-coding
9_siCtrl_WDR5_peak_12693	chr4	10868037	10868770	+	1066	NA	Intergenic	Intergenic	-182011	NM_052964	116449	Hs.62772	NM_052964	ENSG00000109684	CLNK	MIST	cytokine dependent hematopoietic cell linker	protein-coding
9_siCtrl_WDR5_peak_10009	chr2	128820633	128821190	+	1066	NA	Intergenic	Intergenic	-27863	NR_027671	56886	Hs.743306	NM_020120	ENSG00000136731	UGGT1	HUGT1|UGCGL1|UGT1	UDP-glucose glycoprotein glucosyltransferase 1	protein-coding
9_siCtrl_WDR5_peak_16236	chr7	135821624	135822199	+	1066	NA	Intergenic	Intergenic	-159804	NM_145808	136319	Hs.602015	NM_145808	ENSG00000105887	MTPN	GCDP|V-1	myotrophin	protein-coding
9_siCtrl_WDR5_peak_7389	chr17	48449993	48451005	+	1065	NA	promoter-TSS (NM_152463)	promoter-TSS (NM_152463)	46	NM_016504	51264	Hs.7736	NM_016504	ENSG00000108826	MRPL27	L27mt	mitochondrial ribosomal protein L27	protein-coding
9_siCtrl_WDR5_peak_5526	chr15	38746086	38746952	+	1065	NA	intron (NM_173611, intron 1 of 7)	CpG	191	NM_173611	283742	Hs.6799	NM_173611	ENSG00000171262	FAM98B	-	family with sequence similarity 98 member B	protein-coding
9_siCtrl_WDR5_peak_1794	chr1	244211056	244212243	+	1065	NA	promoter-TSS (NM_001278196)	promoter-TSS (NM_001278196)	-592	NM_001278196	10472	Hs.69997	NM_006352	ENSG00000179456	ZBTB18	C2H2-171|MRD22|RP58|TAZ-1|ZNF238	zinc finger and BTB domain containing 18	protein-coding
9_siCtrl_WDR5_peak_1490	chr1	211431868	211434059	+	1064	NA	promoter-TSS (NM_018254)	promoter-TSS (NM_018254)	-326	NM_018254	55758	Hs.356399	NM_018254	ENSG00000117625	RCOR3	-	REST corepressor 3	protein-coding
9_siCtrl_WDR5_peak_7006	chr17	17942078	17943027	+	1063	NA	promoter-TSS (NM_145691)	promoter-TSS (NM_145691)	-70	NM_145691	91647	Hs.528889	NM_145691	ENSG00000171953	ATPAF2	ATP12|ATP12p|LP3663|MC5DN1	ATP synthase mitochondrial F1 complex assembly factor 2	protein-coding
9_siCtrl_WDR5_peak_11240	chr21	44526960	44527928	+	1063	NA	intron (NM_001025204, intron 1 of 8)	CpG	236	NM_001320650	102724594	Hs.365116	NM_001320646	ENSG00000275895	U2AF1L5	-	U2 small nuclear RNA auxiliary factor 1 like 5	protein-coding
9_siCtrl_WDR5_peak_12605	chr4	330471	332168	+	1063	NA	promoter-TSS (NM_001348277)	promoter-TSS (NM_001348277)	-284	NM_001348278	7700	Hs.654355	NM_003441	ENSG00000131127	ZNF141	D4S90|pHZ-44	zinc finger protein 141	protein-coding
9_siCtrl_WDR5_peak_9008	chr19	52074241	52074831	+	1061	NA	promoter-TSS (NM_007147)	promoter-TSS (NM_007147)	0	NM_007147	7728	Hs.119014	NM_007147	ENSG00000105497	ZNF175	OTK18	zinc finger protein 175	protein-coding
9_siCtrl_WDR5_peak_8913	chr19	46498153	46499082	+	1060	NA	promoter-TSS (NM_001267723)	promoter-TSS (NM_001267723)	-108	NM_001267723	729440	Hs.515479	NM_001080402	ENSG00000104983	CCDC61	-	coiled-coil domain containing 61	protein-coding
9_siCtrl_WDR5_peak_11497	chr22	41032190	41033377	+	1060	NA	promoter-TSS (NM_020831)	promoter-TSS (NM_020831)	-60	NM_001282662	57591	Hs.654688	NM_020831	ENSG00000196588	MRTFA	BSAC|MAL|MKL|MKL1|MRTF-A	myocardin related transcription factor A	protein-coding
9_siCtrl_WDR5_peak_11098	chr20	62612257	62612795	+	1060	NA	promoter-TSS (NM_012469)	promoter-TSS (NM_012469)	41	NM_012469	24148	Hs.31334	NM_012469	ENSG00000101161	PRPF6	ANT-1|ANT1|C20orf14|Prp6|RP60|SNRNP102|TOM|U5-102K|hPrp6	pre-mRNA processing factor 6	protein-coding
9_siCtrl_WDR5_peak_6355	chr16	15644313	15644990	+	1059	NA	intron (NM_001142469, intron 2 of 5)	MIRb|SINE|MIR	48528	NM_001142469	89927	Hs.401798	NM_033201	ENSG00000166780	BMERB1	C16orf45|MINP	bMERB domain containing 1	protein-coding
9_siCtrl_WDR5_peak_9963	chr2	114341292	114342280	+	1058	NA	intron (NR_024077, intron 1 of 10)	CpG	556	NR_024077	375260	Hs.446466	NM_198943	ENSG00000146556	WASH2P	FAM39B	WASP family homolog 2, pseudogene	pseudo
9_siCtrl_WDR5_peak_4302	chr12	117127615	117128587	+	1057	NA	Intergenic	Intergenic	47773	NM_001353625	79794	Hs.120170	NM_024738	ENSG00000111412	C12orf49	-	chromosome 12 open reading frame 49	protein-coding
9_siCtrl_WDR5_peak_12651	chr4	4249574	4250510	+	1056	NA	promoter-TSS (NM_001297551)	promoter-TSS (NM_001297551)	-73	NM_032927	85013	Hs.12845	NM_032927	ENSG00000132406	TMEM128	-	transmembrane protein 128	protein-coding
9_siCtrl_WDR5_peak_5966	chr15	78973884	78974517	+	1056	NA	Intergenic	Intergenic	-40648	NM_000750	1143	Hs.624178	NM_000750	ENSG00000117971	CHRNB4	-	cholinergic receptor nicotinic beta 4 subunit	protein-coding
9_siCtrl_WDR5_peak_9718	chr2	71453723	71454577	+	1054	NA	promoter-TSS (NM_020459)	promoter-TSS (NM_020459)	83	NM_020459	400961	Hs.416735	NM_020459	ENSG00000124374	PAIP2B	-	poly(A) binding protein interacting protein 2B	protein-coding
9_siCtrl_WDR5_peak_8825	chr19	41195991	41196635	+	1054	NA	promoter-TSS (NM_001289980)	promoter-TSS (NM_001289980)	243	NM_004756	9253	Hs.326953	NM_004756	ENSG00000105245	NUMBL	CAG3A|CTG3a|NBL|NUMB-R|NUMBLIKE|NUMBR|TNRC23	NUMB like endocytic adaptor protein	protein-coding
9_siCtrl_WDR5_peak_6943	chr17	8533786	8534681	+	1054	NA	promoter-TSS (NM_001256095)	promoter-TSS (NM_001256095)	-154	NM_001256095	4628	Hs.16355	NM_005964	ENSG00000133026	MYH10	NMMHC-IIB|NMMHCB	myosin heavy chain 10	protein-coding
9_siCtrl_WDR5_peak_7459	chr17	55037810	55038512	+	1053	NA	exon (NM_004645, exon 1 of 7)	exon (NM_004645, exon 1 of 7)	250	NM_004645	8161	Hs.532795	NM_004645	ENSG00000121058	COIL	CLN80|p80-coilin	coilin	protein-coding
9_siCtrl_WDR5_peak_12463	chr3	179280517	179281357	+	1053	NA	5' UTR (NM_178042, exon 1 of 14)	5' UTR (NM_178042, exon 1 of 14)	223	NM_004301	86	Hs.435326	NM_004301	ENSG00000136518	ACTL6A	ACTL6|ARPN-BETA|Arp4|BAF53A|INO80K	actin like 6A	protein-coding
9_siCtrl_WDR5_peak_14306	chr6	5471885	5472795	+	1053	NA	intron (NM_001318872, intron 4 of 6)	intron (NM_001318872, intron 4 of 6)	-14032	NR_125848	101927972	Hs.668417	NR_125846	ENSG00000269985	LOC101927972	-	uncharacterized LOC101927972	ncRNA
9_siCtrl_WDR5_peak_12515	chr3	186500656	186502329	+	1052	NA	intron (NM_001967, intron 1 of 10)	CpG	126	NM_001967	1974	Hs.518475	NM_001967	ENSG00000156976	EIF4A2	BM-010|DDX2B|EIF4A|EIF4F|eIF-4A-II|eIF4A-II	eukaryotic translation initiation factor 4A2	protein-coding
9_siCtrl_WDR5_peak_7180	chr17	38136898	38137562	+	1051	NA	exon (NM_002809, exon 1 of 12)	exon (NM_002809, exon 1 of 12)	170	NM_002809	5709	Hs.12970	NM_002809	ENSG00000108344	PSMD3	P58|RPN3|S3|TSTA2	proteasome 26S subunit, non-ATPase 3	protein-coding
9_siCtrl_WDR5_peak_776	chr1	109968595	109969757	+	1050	NA	promoter-TSS (NM_002790)	promoter-TSS (NM_002790)	-106	NM_001199774	5686	Hs.485246	NM_002790	ENSG00000143106	PSMA5	PSC5|ZETA	proteasome subunit alpha 5	protein-coding
9_siCtrl_WDR5_peak_15789	chr7	66093312	66094297	+	1049	NA	promoter-TSS (NM_153033)	promoter-TSS (NM_153033)	-64	NM_001167961	154881	Hs.546627	NM_153033	ENSG00000243335	KCTD7	CLN14|EPM3	potassium channel tetramerization domain containing 7	protein-coding
9_siCtrl_WDR5_peak_5042	chr14	50778581	50779879	+	1049	NA	promoter-TSS (NM_024884)	promoter-TSS (NM_024884)	188	NM_001003805	27109	Hs.438489	NM_015684	ENSG00000125375	DMAC2L	ATP5S|ATPW|FB|HSU79253	distal membrane arm assembly complex 2 like	protein-coding
9_siCtrl_WDR5_peak_3674	chr12	31226217	31228055	+	1049	NA	promoter-TSS (NR_038927)	promoter-TSS (NR_038927)	342	NM_004399	1663	Hs.443960	NM_004399	ENSG00000013573	DDX11	CHL1|CHLR1|KRG2|WABS	DEAD/H-box helicase 11	protein-coding
9_siCtrl_WDR5_peak_5788	chr15	66161402	66162935	+	1049	NA	intron (NM_004663, intron 1 of 4)	CpG	339	NM_004663	8766	Hs.321541	NM_004663	ENSG00000103769	RAB11A	YL8	RAB11A, member RAS oncogene family	protein-coding
9_siCtrl_WDR5_peak_3839	chr12	53894214	53895631	+	1048	NA	promoter-TSS (NM_134324)	promoter-TSS (NM_134324)	-145	NM_134323	6895	Hs.326	NM_004178	ENSG00000139546	TARBP2	LOQS|TRBP|TRBP1|TRBP2	TARBP2 subunit of RISC loading complex	protein-coding
9_siCtrl_WDR5_peak_10037	chr2	133843127	133843626	+	1048	NA	intron (NM_207363, intron 6 of 19)	intron (NM_207363, intron 6 of 19)	170246	NR_135572	101928185	Hs.680114	NR_135572	ENSG00000233729	NCKAP5-AS1	-	NCKAP5 antisense RNA 1	ncRNA
9_siCtrl_WDR5_peak_16564	chr8	30013611	30014158	+	1048	NA	promoter-TSS (NM_006571)	promoter-TSS (NM_006571)	-1	NM_006571	10671	Hs.158427	NM_006571	ENSG00000104671	DCTN6	WS-3|WS3|p27	dynactin subunit 6	protein-coding
9_siCtrl_WDR5_peak_3870	chr12	56211037	56212556	+	1046	NA	promoter-TSS (NM_033082)	promoter-TSS (NM_033082)	-29	NM_014182	29095	Hs.534450	NM_014182	ENSG00000123353	ORMDL2	HSPC160|MST095|MSTP095|adoplin-2	ORMDL sphingolipid biosynthesis regulator 2	protein-coding
9_siCtrl_WDR5_peak_2612	chr10	131908790	131910001	+	1046	NA	promoter-TSS (NR_034125)	promoter-TSS (NR_034125)	-301	NM_001355042	387723	Hs.127394	NM_001355042	ENSG00000237489	C10orf143	LINC00959	chromosome 10 open reading frame 143	protein-coding
9_siCtrl_WDR5_peak_7056	chr17	26988693	26989611	+	1046	NA	promoter-TSS (NM_006923)	promoter-TSS (NM_006923)	55	NR_045585	6388	Hs.514036	NM_006923	ENSG00000132581	SDF2	-	stromal cell derived factor 2	protein-coding
9_siCtrl_WDR5_peak_4632	chr13	42534714	42535658	+	1045	NA	promoter-TSS (NR_039974)	promoter-TSS (NR_039974)	35	NM_001009814	23078	Hs.368282	NM_015058	ENSG00000102763	VWA8	KIAA0564|P7BP2	von Willebrand factor A domain containing 8	protein-coding
9_siCtrl_WDR5_peak_15383	chr6	170862712	170864014	+	1045	NA	promoter-TSS (NM_001172085)	promoter-TSS (NM_001172085)	-58	NM_001172085	6908	Hs.590872	NM_003194	ENSG00000112592	TBP	GTF2D|GTF2D1|HDL4|SCA17|TFIID	TATA-box binding protein	protein-coding
9_siCtrl_WDR5_peak_2184	chr10	74114030	74114959	+	1044	NA	intron (NM_001002762, intron 1 of 7)	CpG	183	NR_157570	54788	Hs.500013	NM_017626	ENSG00000148719	DNAJB12	DJ10	DnaJ heat shock protein family (Hsp40) member B12	protein-coding
9_siCtrl_WDR5_peak_2364	chr10	101379821	101381055	+	1042	NA	promoter-TSS (NM_031212)	promoter-TSS (NM_031212)	-242	NM_031212	81894	Hs.403790	NM_031212	ENSG00000155287	SLC25A28	MFRN2|MRS3/4|MRS4L|NPD016	solute carrier family 25 member 28	protein-coding
9_siCtrl_WDR5_peak_9112	chr19	58010932	58011698	+	1042	NA	promoter-TSS (NM_001304337)	promoter-TSS (NM_001304337)	9	NR_130705	374928	Hs.579576	NM_198542	ENSG00000152439	ZNF773	ZNF419B	zinc finger protein 773	protein-coding
9_siCtrl_WDR5_peak_12246	chr3	127842239	127843360	+	1041	NA	promoter-TSS (NM_003707)	promoter-TSS (NM_003707)	-144	NM_001319084	8607	Hs.272822	NM_003707	ENSG00000175792	RUVBL1	ECP-54|ECP54|INO80H|NMP 238|NMP238|PONTIN|Pontin52|RVB1|TIH1|TIP49|TIP49A	RuvB like AAA ATPase 1	protein-coding
9_siCtrl_WDR5_peak_8536	chr19	14062575	14063777	+	1041	NA	promoter-TSS (NM_138353)	promoter-TSS (NM_138353)	-110	NM_138353	90379	Hs.443636	NM_138353	ENSG00000132017	DCAF15	C19orf72	DDB1 and CUL4 associated factor 15	protein-coding
9_siCtrl_WDR5_peak_10517	chr2	230785785	230787663	+	1041	NA	promoter-TSS (NM_001348331)	promoter-TSS (NM_001348331)	1	NM_001348323	9320	Hs.572642	NM_004238	ENSG00000153827	TRIP12	MRD49|TRIP-12|ULF	thyroid hormone receptor interactor 12	protein-coding
9_siCtrl_WDR5_peak_8730	chr19	36239090	36239712	+	1041	NA	promoter-TSS (NM_019104)	promoter-TSS (NM_019104)	-76	NM_019104	55957	Hs.529100	NM_019104	ENSG00000267796	LIN37	F25965|ZK418.4|lin-37	lin-37 DREAM MuvB core complex component	protein-coding
9_siCtrl_WDR5_peak_17672	chr9	117021922	117022424	+	1040	NA	intron (NM_032888, intron 28 of 60)	intron (NM_032888, intron 28 of 60)	50459	NR_030255	619556		NR_030255	ENSG00000207726	MIR455	MIRN455|hsa-mir-455|mir-455	microRNA 455	ncRNA
9_siCtrl_WDR5_peak_566	chr1	70686798	70687902	+	1040	NA	exon (NM_001350608, exon 2 of 13)	exon (NM_001350608, exon 2 of 13)	287	NM_001350605	9295	Hs.479693	NM_004768	ENSG00000116754	SRSF11	NET2|SFRS11|dJ677H15.2|p54	serine and arginine rich splicing factor 11	protein-coding
9_siCtrl_WDR5_peak_5395	chr14	104028498	104029668	+	1040	NA	promoter-TSS (NM_001302652)	promoter-TSS (NM_001302652)	68	NM_001015048	9529	Hs.5443	NM_004873	ENSG00000166170	BAG5	BAG-5	BCL2 associated athanogene 5	protein-coding
9_siCtrl_WDR5_peak_5773	chr15	65425412	65426723	+	1040	NA	promoter-TSS (NM_005707)	promoter-TSS (NM_005707)	79	NM_005707	10081	Hs.458596	NM_005707	ENSG00000090470	PDCD7	ES18|HES18	programmed cell death 7	protein-coding
9_siCtrl_WDR5_peak_6882	chr17	5371804	5372802	+	1040	NA	promoter-TSS (NR_135644)	promoter-TSS (NR_135644)	-1	NM_020162	56919	Hs.250456	NM_020162	ENSG00000005100	DHX33	DDX33	DEAH-box helicase 33	protein-coding
9_siCtrl_WDR5_peak_9145	chr19	58891709	58893043	+	1039	NA	promoter-TSS (NM_138466)	promoter-TSS (NM_138466)	21	NR_049780	116412	Hs.222236	NM_138466	ENSG00000152475	ZNF837	-	zinc finger protein 837	protein-coding
9_siCtrl_WDR5_peak_6179	chr15	102501520	102502451	+	1039	NA	intron (NR_003659, intron 1 of 10)	CpG	969	NR_003659	374666	Hs.459573	NM_199163		WASH3P	FAM39DP	WASP family homolog 3, pseudogene	pseudo
9_siCtrl_WDR5_peak_8379	chr19	5340918	5341407	+	1039	NA	promoter-TSS (NM_002850)	promoter-TSS (NM_002850)	-339	NM_002850	5802	Hs.744928	NM_002850	ENSG00000105426	PTPRS	PTPSIGMA|R-PTP-S|R-PTP-sigma	protein tyrosine phosphatase receptor type S	protein-coding
9_siCtrl_WDR5_peak_10389	chr2	206949408	206950847	+	1038	NA	intron (NM_017759, intron 1 of 10)	CpG	771	NM_017759	54891	Hs.445036	NM_017759	ENSG00000114933	INO80D	-	INO80 complex subunit D	protein-coding
9_siCtrl_WDR5_peak_9283	chr2	18304367	18305034	+	1037	NA	Intergenic	L2a|LINE|L2	244766	NM_002252	3790	Hs.414489	NM_002252	ENSG00000170745	KCNS3	KV9.3	potassium voltage-gated channel modifier subfamily S member 3	protein-coding
9_siCtrl_WDR5_peak_12775	chr4	41824176	41824756	+	1037	NA	Intergenic	Intergenic	60162	NR_104143	101927074	Hs.611425	NR_104143	ENSG00000245870	LINC00682	-	long intergenic non-protein coding RNA 682	ncRNA
9_siCtrl_WDR5_peak_7211	chr17	40539836	40541268	+	1035	NA	promoter-TSS (NM_001369519)	promoter-TSS (NM_001369519)	-39	NM_139276	6774	Hs.463059	NM_003150	ENSG00000168610	STAT3	ADMIO|ADMIO1|APRF|HIES	signal transducer and activator of transcription 3	protein-coding
9_siCtrl_WDR5_peak_241	chr1	36022703	36023711	+	1035	NA	promoter-TSS (NM_001014841)	promoter-TSS (NM_001014841)	-186	NM_001014841	23154	Hs.121870	NM_014284	ENSG00000020129	NCDN	-	neurochondrin	protein-coding
9_siCtrl_WDR5_peak_2485	chr10	115110072	115110530	+	1033	NA	Intergenic	Intergenic	-200289	NM_001177660	3026	Hs.422542	NM_004132	ENSG00000148702	HABP2	FSAP|HABP|HGFAL|NMTC5|PHBP	hyaluronan binding protein 2	protein-coding
9_siCtrl_WDR5_peak_4044	chr12	76741717	76742616	+	1031	NA	promoter-TSS (NM_024685)	promoter-TSS (NM_024685)	29	NM_024685	79738	Hs.96322	NM_024685	ENSG00000179941	BBS10	C12orf58	Bardet-Biedl syndrome 10	protein-coding
9_siCtrl_WDR5_peak_11174	chr21	34143348	34144688	+	1031	NA	promoter-TSS (NM_013329)	promoter-TSS (NM_013329)	48	NM_016631	94104	Hs.644004	NM_013329	ENSG00000159086	PAXBP1	BM020|C21orf66|FSAP105|GCFC|GCFC1	PAX3 and PAX7 binding protein 1	protein-coding
9_siCtrl_WDR5_peak_12883	chr4	74123461	74125393	+	1031	NA	promoter-TSS (NM_015574)	promoter-TSS (NM_015574)	88	NM_198889	26057	Hs.601206	NM_015574	ENSG00000132466	ANKRD17	GTAR|MASK2|NY-BR-16	ankyrin repeat domain 17	protein-coding
9_siCtrl_WDR5_peak_2577	chr10	126848089	126849171	+	1029	NA	promoter-TSS (NM_001321012)	promoter-TSS (NM_001321012)	-104	NM_001321012	1488	Hs.501345	NM_001329	ENSG00000175029	CTBP2	-	C-terminal binding protein 2	protein-coding
9_siCtrl_WDR5_peak_3092	chr11	68227598	68228883	+	1029	NA	promoter-TSS (NR_147970)	promoter-TSS (NR_147970)	20	NR_147966	55291	Hs.503022	NM_018312	ENSG00000110075	PPP6R3	C11orf23|PP6R3|SAP190|SAPL|SAPLa|SAPS3	protein phosphatase 6 regulatory subunit 3	protein-coding
9_siCtrl_WDR5_peak_9912	chr2	105654563	105655725	+	1029	NA	promoter-TSS (NR_110603)	promoter-TSS (NR_110603)	-190	NR_110603	102724691	Hs.606390	NR_110603	ENSG00000224509	LOC102724691	-	uncharacterized LOC102724691	ncRNA
9_siCtrl_WDR5_peak_1000	chr1	154193386	154194201	+	1029	NA	promoter-TSS (NM_001297720)	promoter-TSS (NM_001297720)	362	NM_014847	9898	Hs.490551	NM_014847	ENSG00000143569	UBAP2L	NICE-4|NICE4	ubiquitin associated protein 2 like	protein-coding
9_siCtrl_WDR5_peak_5227	chr14	76934207	76934654	+	1029	NA	intron (NM_004452, intron 5 of 10)	intron (NM_004452, intron 5 of 10)	96740	NM_004452	2103	Hs.435845	NM_004452	ENSG00000119715	ESRRB	DFNB35|ERR2|ERRb|ESRL2|NR3B2	estrogen related receptor beta	protein-coding
9_siCtrl_WDR5_peak_3025	chr11	64863353	64864133	+	1029	NA	promoter-TSS (NM_013265)	promoter-TSS (NM_013265)	57	NR_073519	738	Hs.277517	NM_013265	ENSG00000149823	VPS51	ANG2|ANG3|C11orf2|C11orf3|FFR	VPS51 subunit of GARP complex	protein-coding
9_siCtrl_WDR5_peak_16971	chr8	117778472	117779237	+	1027	NA	promoter-TSS (NM_032334)	promoter-TSS (NM_032334)	91	NM_032334	84294	Hs.86970	NM_032334	ENSG00000147679	UTP23	C8orf53	UTP23 small subunit processome component	protein-coding
9_siCtrl_WDR5_peak_5642	chr15	49170009	49170965	+	1026	NA	exon (NM_014335, exon 1 of 1)	exon (NM_014335, exon 1 of 1)	156	NM_014335	23741	Hs.255973	NM_014335	ENSG00000255302	EID1	C15orf3|CRI1|EID-1|IRO45620|PNAS-22|PTD014|RBP21	EP300 interacting inhibitor of differentiation 1	protein-coding
9_siCtrl_WDR5_peak_9660	chr2	65356573	65357891	+	1026	NA	promoter-TSS (NM_004161)	promoter-TSS (NM_004161)	8	NM_004161	5861	Hs.310645	NM_004161	ENSG00000138069	RAB1A	RAB1|YPT1	RAB1A, member RAS oncogene family	protein-coding
9_siCtrl_WDR5_peak_17930	chrX	16900952	16901954	+	1025	NA	Intergenic	Intergenic	-12968	NM_002893	5931	Hs.495755	NM_002893	ENSG00000102054	RBBP7	RbAp46	RB binding protein 7, chromatin remodeling factor	protein-coding
9_siCtrl_WDR5_peak_2424	chr10	104503224	104503998	+	1025	NA	promoter-TSS (NM_001083913)	promoter-TSS (NM_001083913)	-94	NM_001083913	54838	Hs.500897	NM_017787	ENSG00000166272	WBP1L	C10orf26|OPA1L|OPAL1	WW domain binding protein 1 like	protein-coding
9_siCtrl_WDR5_peak_9864	chr2	97523403	97524152	+	1024	NA	promoter-TSS (NM_016466)	promoter-TSS (NM_016466)	-24	NM_016466	51239	Hs.709507	NM_016466	ENSG00000213337	ANKRD39	-	ankyrin repeat domain 39	protein-coding
9_siCtrl_WDR5_peak_4153	chr12	101801415	101802259	+	1024	NA	promoter-TSS (NM_001177)	promoter-TSS (NM_001177)	-239	NM_001301068	400	Hs.372616	NM_001177	ENSG00000120805	ARL1	ARFL1	ADP ribosylation factor like GTPase 1	protein-coding
9_siCtrl_WDR5_peak_9108	chr19	57922216	57922822	+	1023	NA	promoter-TSS (NM_001330617)	promoter-TSS (NM_001330617)	4	NM_001330617	7565	Hs.729403	NM_006959	ENSG00000186272	ZNF17	HPF3|KOX10	zinc finger protein 17	protein-coding
9_siCtrl_WDR5_peak_13780	chr5	112196617	112197429	+	1023	NA	promoter-TSS (NM_003135)	promoter-TSS (NM_003135)	39	NM_001204199	6728	Hs.637001	NM_003135	ENSG00000153037	SRP19	-	signal recognition particle 19	protein-coding
9_siCtrl_WDR5_peak_7867	chr17	79632874	79634326	+	1019	NA	promoter-TSS (NR_130938)	promoter-TSS (NR_130938)	35	NM_001039842	339229	Hs.405942	NM_001039842	ENSG00000204237	OXLD1	C17orf90	oxidoreductase like domain containing 1	protein-coding
9_siCtrl_WDR5_peak_7364	chr17	47491721	47492726	+	1019	NA	promoter-TSS (NM_001281715)	promoter-TSS (NM_001281715)	-3	NM_001281496	5245	Hs.514303	NM_002634	ENSG00000167085	PHB	HEL-215|HEL-S-54e|PHB1	prohibitin	protein-coding
9_siCtrl_WDR5_peak_10150	chr2	163823726	163824151	+	1019	NA	Intergenic	Intergenic	-128661	NM_173162	90134	Hs.657413	NM_033272	ENSG00000184611	KCNH7	ERG3|HERG3|Kv11.3	potassium voltage-gated channel subfamily H member 7	protein-coding
9_siCtrl_WDR5_peak_1037	chr1	155210385	155211261	+	1018	NA	intron (NM_001005741, intron 2 of 11)	intron (NM_001005741, intron 2 of 11)	217	NM_000157	2629	Hs.282997	NM_000157	ENSG00000177628	GBA	GBA1|GCB|GLUC	glucosylceramidase beta	protein-coding
9_siCtrl_WDR5_peak_11065	chr20	58012607	58013205	+	1018	NA	Intergenic	Intergenic	137240	NM_001302455	1908	Hs.1408	NM_000114	ENSG00000124205	EDN3	ET-3|ET3|HSCR4|PPET3|WS4B	endothelin 3	protein-coding
9_siCtrl_WDR5_peak_3813	chr12	51632281	51633394	+	1016	NA	intron (NM_001136267, intron 1 of 3)	CpG	227	NM_014764	9802	Hs.369761	NM_014764	ENSG00000183283	DAZAP2	PRTB	DAZ associated protein 2	protein-coding
9_siCtrl_WDR5_peak_15393	chr7	1177598	1178204	+	1015	NA	promoter-TSS (NM_001350970)	promoter-TSS (NM_001350970)	-8	NM_001134395	84310	Hs.653258	NM_032350	ENSG00000146540	C7orf50	YCR016W	chromosome 7 open reading frame 50	protein-coding
9_siCtrl_WDR5_peak_7643	chr17	69028763	69029346	+	1014	NA	Intergenic	Intergenic	169266	NR_104152	101928165	Hs.407613	NR_104152	ENSG00000260785	CASC17	LINC00600	cancer susceptibility 17	ncRNA
9_siCtrl_WDR5_peak_250	chr1	36851445	36852052	+	1012	NA	promoter-TSS (NM_001282547)	promoter-TSS (NM_001282547)	-223	NM_001282546	83931	Hs.471768	NM_032017	ENSG00000196182	STK40	SHIK|SgK495	serine/threonine kinase 40	protein-coding
9_siCtrl_WDR5_peak_15722	chr7	44925006	44925810	+	1012	NA	promoter-TSS (NM_033224)	promoter-TSS (NM_033224)	-279	NM_033224	5814	Hs.349150	NM_033224	ENSG00000146676	PURB	PURBETA	purine rich element binding protein B	protein-coding
9_siCtrl_WDR5_peak_11291	chr22	18110871	18111972	+	1012	NA	promoter-TSS (NM_001696)	promoter-TSS (NM_001696)	94	NM_001696	529	Hs.517338	NM_001696	ENSG00000131100	ATP6V1E1	ARCL2C|ATP6E|ATP6E2|ATP6V1E|P31|Vma4	ATPase H+ transporting V1 subunit E1	protein-coding
9_siCtrl_WDR5_peak_6676	chr16	67875678	67876487	+	1012	NA	promoter-TSS (NM_020457)	promoter-TSS (NM_020457)	-141	NM_020457	57215	Hs.632200	NM_020457	ENSG00000168286	THAP11	CTG-B43a|CTG-B45d|HRIHFB2206|RONIN	THAP domain containing 11	protein-coding
9_siCtrl_WDR5_peak_11972	chr3	58291803	58292469	+	1010	NA	5' UTR (NM_001098783, exon 1 of 6)	5' UTR (NM_001098783, exon 1 of 6)	164	NM_001348714	109703458	Hs.446320	NM_001348712	ENSG00000255154	HTD2	-	hydroxyacyl-thioester dehydratase type 2	protein-coding
9_siCtrl_WDR5_peak_7012	chr17	18217583	18219085	+	1010	NA	promoter-TSS (NM_001320759)	promoter-TSS (NM_001320759)	-26	NM_004618	7156	Hs.592115	NM_004618	ENSG00000177302	TOP3A	MGRISCE2|PEOB5|TOP3|ZGRF7	DNA topoisomerase III alpha	protein-coding
9_siCtrl_WDR5_peak_8885	chr19	45147187	45148148	+	1010	NA	intron (NM_006505, intron 1 of 7)	CpG	457	NM_001135769	5817	Hs.171844	NM_006505	ENSG00000073008	PVR	CD155|HVED|NECL5|Necl-5|PVS|TAGE4	PVR cell adhesion molecule	protein-coding
9_siCtrl_WDR5_peak_9570	chr2	54013584	54014744	+	1009	NA	promoter-TSS (NM_016115)	promoter-TSS (NM_016115)	-17	NM_015701	27248	Hs.438336	NM_015701	ENSG00000068912	ERLEC1	C2orf30|CIM|CL24936|CL25084|HEL117|XTP3-B|XTP3TPB	endoplasmic reticulum lectin 1	protein-coding
9_siCtrl_WDR5_peak_16130	chr7	120590444	120591161	+	1009	NA	promoter-TSS (NM_198267)	promoter-TSS (NM_198267)	-29	NM_019071	54556	Hs.489811	NM_019071	ENSG00000071243	ING3	Eaf4|ING2|MEAF4|p47ING3	inhibitor of growth family member 3	protein-coding
9_siCtrl_WDR5_peak_8579	chr19	17377897	17378638	+	1009	NA	promoter-TSS (NM_014173)	promoter-TSS (NM_014173)	15	NM_014173	29086	Hs.190722	NM_014173	ENSG00000105393	BABAM1	C19orf62|HSPC142|MERIT40|NBA1	BRISC and BRCA1 A complex member 1	protein-coding
9_siCtrl_WDR5_peak_4603	chr13	37478305	37478811	+	1009	NA	intron (NM_005905, intron 1 of 5)	intron (NM_005905, intron 1 of 5)	15817	NM_005905	4093	Hs.123119	NM_005905	ENSG00000120693	SMAD9	MADH6|MADH9|PPH2|SMAD8|SMAD8/9|SMAD8A|SMAD8B	SMAD family member 9	protein-coding
9_siCtrl_WDR5_peak_5649	chr15	49912923	49913685	+	1009	NA	promoter-TSS (NM_001144955)	promoter-TSS (NM_001144955)	59	NM_020234	56986	Hs.127432	NM_020234	ENSG00000104047	DTWD1	MDS009	DTW domain containing 1	protein-coding
9_siCtrl_WDR5_peak_5100	chr14	58893457	58894714	+	1008	NA	promoter-TSS (NM_001244190)	promoter-TSS (NM_001244190)	-18	NM_001244191	9786	Hs.232532	NM_014749	ENSG00000100578	KIAA0586	JBTS23|SRTD14|Talpid3	KIAA0586	protein-coding
9_siCtrl_WDR5_peak_6020	chr15	85174213	85174994	+	1007	NA	promoter-TSS (NR_003654)	promoter-TSS (NR_003654)	-88	NR_004859	54581	Hs.658114	NM_022050		SCAND2P	SCAND2	SCAN domain containing 2 pseudogene	pseudo
9_siCtrl_WDR5_peak_11878	chr3	48955859	48956954	+	1007	NA	non-coding (NR_146083, exon 1 of 16)	non-coding (NR_146083, exon 1 of 16)	131	NM_001317334	10425	Hs.633601	NM_006321	ENSG00000177479	ARIH2	ARI2|TRIAD1	ariadne RBR E3 ubiquitin protein ligase 2	protein-coding
9_siCtrl_WDR5_peak_7715	chr17	73007967	73009420	+	1006	NA	promoter-TSS (NM_001545)	promoter-TSS (NM_001545)	-72	NM_001303265	3396	Hs.407955	NM_001545	ENSG00000167862	MRPL58	DS-1|DS1|ICT1|MRP-L58	mitochondrial ribosomal protein L58	protein-coding
9_siCtrl_WDR5_peak_1842	chr10	1033983	1034895	+	1005	NA	promoter-TSS (NM_012341)	promoter-TSS (NM_012341)	65	NM_012341	23560	Hs.215766	NM_012341	ENSG00000107937	GTPBP4	CRFG|NGB|NOG1	GTP binding protein 4	protein-coding
9_siCtrl_WDR5_peak_13292	chr4	177454386	177454863	+	1005	NA	Intergenic	ERVL-E-int|LTR|ERVL	213507	NM_021928	60559	Hs.42194	NM_021928	ENSG00000129128	SPCS3	PRO3567|SPC22/23|SPC3|YLR066W	signal peptidase complex subunit 3	protein-coding
9_siCtrl_WDR5_peak_6895	chr17	7142609	7143286	+	1005	NA	promoter-TSS (NM_024297)	promoter-TSS (NM_024297)	-171	NM_001284517	79142	Hs.644724	NM_024297	ENSG00000040633	PHF23	hJUNE-1b	PHD finger protein 23	protein-coding
9_siCtrl_WDR5_peak_10321	chr2	198363794	198365476	+	1005	NA	promoter-TSS (NM_001202485)	promoter-TSS (NM_001202485)	-71	NM_002156	3329	Hs.595053	NM_002156	ENSG00000144381	HSPD1	CPN60|GROEL|HLD4|HSP-60|HSP60|HSP65|HuCHA60|SPG13	heat shock protein family D (Hsp60) member 1	protein-coding
9_siCtrl_WDR5_peak_12905	chr4	78078006	78078604	+	1005	NA	promoter-TSS (NM_004354)	promoter-TSS (NM_004354)	-55	NM_004354	901	Hs.740456	NM_004354	ENSG00000138764	CCNG2	-	cyclin G2	protein-coding
9_siCtrl_WDR5_peak_1354	chr1	200980785	200981278	+	1003	NA	intron (NM_017596, intron 1 of 33)	intron (NM_017596, intron 1 of 33)	11811	NM_017596	23046	Hs.169182	NM_017596	ENSG00000116852	KIF21B	-	kinesin family member 21B	protein-coding
9_siCtrl_WDR5_peak_15960	chr7	92218956	92219802	+	1002	NA	promoter-TSS (NM_001288584)	promoter-TSS (NM_001288584)	-16	NM_001288584	257415	Hs.18564	NM_152789	ENSG00000234545	FAM133B	-	family with sequence similarity 133 member B	protein-coding
9_siCtrl_WDR5_peak_385	chr1	53940349	53941126	+	1000	NA	Intergenic	Intergenic	15665	NM_033067	63948	Hs.131654	NM_033067	ENSG00000143006	DMRTB1	-	DMRT like family B with proline rich C-terminal 1	protein-coding
9_siCtrl_WDR5_peak_10196	chr2	174218955	174220282	+	1000	NA	promoter-TSS (NM_031942)	promoter-TSS (NM_031942)	18	NM_031942	83879	Hs.470654	NM_031942	ENSG00000144354	CDCA7	ICF3|JPO1	cell division cycle associated 7	protein-coding
9_siCtrl_WDR5_peak_11172	chr21	33984404	33985730	+	999	NA	promoter-TSS (NM_021254)	promoter-TSS (NM_021254)	114	NM_001350335	56683	Hs.5811	NM_017835	ENSG00000159079	CFAP298	C21orf48|C21orf59|CILD26|FBB18|Kur	cilia and flagella associated protein 298	protein-coding
9_siCtrl_WDR5_peak_10476	chr2	220094086	220094935	+	998	NA	promoter-TSS (NM_001042410)	promoter-TSS (NM_001042410)	-18	NM_001042410	55139	Hs.437647	NM_018089	ENSG00000163516	ANKZF1	Vms1|ZNF744	ankyrin repeat and zinc finger peptidyl tRNA hydrolase 1	protein-coding
9_siCtrl_WDR5_peak_3279	chr11	107798416	107799904	+	997	NA	promoter-TSS (NM_017516)	promoter-TSS (NM_017516)	-14	NM_017516	54734	Hs.354906	NM_017516	ENSG00000179331	RAB39A	RAB39	RAB39A, member RAS oncogene family	protein-coding
9_siCtrl_WDR5_peak_1034	chr1	155188439	155189055	+	997	NA	intron (NR_002188, intron 1 of 12)	intron (NR_002188, intron 1 of 12)	8578	NR_002188	2630	Hs.719930	NR_002188	ENSG00000160766	GBAP1	Beta-GC|GBA|GBAP|GC|GLUC	glucosylceramidase beta pseudogene 1	pseudo
9_siCtrl_WDR5_peak_13674	chr5	78908204	78908909	+	994	NA	5' UTR (NM_001297744, exon 1 of 16)	5' UTR (NM_001297744, exon 1 of 16)	292	NM_001114393	167153	Hs.418198	NM_173797	ENSG00000164329	TENT2	APD4|GLD2|PAPD4|TUT2	terminal nucleotidyltransferase 2	protein-coding
9_siCtrl_WDR5_peak_9087	chr19	56652195	56653111	+	992	NA	promoter-TSS (NM_018337)	promoter-TSS (NM_018337)	-3	NM_001253792	55311	Hs.24545	NM_018337	ENSG00000167685	ZNF444	EZF-2|EZF2|ZSCAN17	zinc finger protein 444	protein-coding
9_siCtrl_WDR5_peak_5785	chr15	65903013	65903946	+	992	NA	promoter-TSS (NM_001366364)	promoter-TSS (NM_001366364)	-10	NM_001207059	81556	Hs.6686	NM_030800	ENSG00000138614	INTS14	C15orf44|VWA9	integrator complex subunit 14	protein-coding
9_siCtrl_WDR5_peak_8996	chr19	50528364	50529701	+	990	NA	promoter-TSS (NM_001006656)	promoter-TSS (NM_001006656)	-227	NM_001025778	51231	Hs.443330	NM_016440	ENSG00000105053	VRK3	-	VRK serine/threonine kinase 3	protein-coding
9_siCtrl_WDR5_peak_12606	chr4	467428	468279	+	990	NA	non-coding (NR_002451, exon 1 of 3)	non-coding (NR_002451, exon 1 of 3)	145	NR_002451	79963	Hs.677493	NM_024903	ENSG00000251595	ABCA11P	ABCA11|EST1133530	ATP binding cassette subfamily A member 11, pseudogene	pseudo
9_siCtrl_WDR5_peak_11244	chr21	45079107	45080153	+	990	NA	promoter-TSS (NM_007031)	promoter-TSS (NM_007031)	189	NM_015056	23076	Hs.565725	NM_015056	ENSG00000160208	RRP1B	KIAA0179|NNP1L|Nnp1|PPP1R136|RRP1	ribosomal RNA processing 1B	protein-coding
9_siCtrl_WDR5_peak_10122	chr2	158899617	158900828	+	990	NA	intron (NM_001135098, intron 2 of 8)	intron (NM_001135098, intron 2 of 8)	48531	NM_001135098	151531	Hs.128427	NM_173355	ENSG00000007001	UPP2	UDRPASE2|UP2|UPASE2	uridine phosphorylase 2	protein-coding
9_siCtrl_WDR5_peak_10325	chr2	198939688	198940176	+	990	NA	intron (NM_006226, intron 1 of 5)	LFSINE_Vert|SINE|SINE	270615	NM_006226	5334	Hs.153322	NM_006226	ENSG00000115896	PLCL1	PLCE|PLCL|PLDL1|PPP1R127|PRIP	phospholipase C like 1 (inactive)	protein-coding
9_siCtrl_WDR5_peak_7866	chr17	79603683	79604296	+	990	NA	promoter-TSS (NM_001290212)	promoter-TSS (NM_001290212)	149	NM_017921	55666	Hs.464333	NM_017921	ENSG00000182446	NPLOC4	NPL4	NPL4 homolog, ubiquitin recognition factor	protein-coding
9_siCtrl_WDR5_peak_8468	chr19	11484782	11485883	+	990	NA	promoter-TSS (NM_175871)	promoter-TSS (NM_175871)	-51	NM_175871	126074	Hs.631619	NM_175871	ENSG00000173928	SWSAP1	C19orf39|SWS1AP1|ZSWIM7AP1	SWIM-type zinc finger 7 associated protein 1	protein-coding
9_siCtrl_WDR5_peak_16020	chr7	100025563	100026314	+	989	NA	promoter-TSS (NM_001194990)	promoter-TSS (NM_001194990)	388	NM_017984	55063	Hs.105191	NM_017984	ENSG00000078487	ZCWPW1	ZCW1	zinc finger CW-type and PWWP domain containing 1	protein-coding
9_siCtrl_WDR5_peak_9401	chr2	29928746	29930000	+	989	NA	intron (NM_004304, intron 2 of 28)	intron (NM_004304, intron 2 of 28)	215079	NM_004304	238	Hs.654469	NM_004304	ENSG00000171094	ALK	CD246|NBLST3	ALK receptor tyrosine kinase	protein-coding
9_siCtrl_WDR5_peak_8564	chr19	16295804	16296684	+	989	NA	promoter-TSS (NM_014077)	promoter-TSS (NM_014077)	23	NM_014077	26017	Hs.631614	NM_014077	ENSG00000105058	FAM32A	OTAG-12|OTAG12	family with sequence similarity 32 member A	protein-coding
9_siCtrl_WDR5_peak_15610	chr7	32529456	32530250	+	989	NA	non-coding (NR_024466, exon 1 of 5)	non-coding (NR_024466, exon 1 of 5)	139	NM_012322	23658	Hs.424908	NM_012322	ENSG00000106355	LSM5	YER146W	LSM5 homolog, U6 small nuclear RNA and mRNA degradation associated	protein-coding
9_siCtrl_WDR5_peak_6369	chr16	19078513	19079510	+	988	NA	promoter-TSS (NM_016138)	promoter-TSS (NM_016138)	2	NR_119379	102723385	Hs.569608	NR_119379	ENSG00000261465	LOC102723385	-	uncharacterized LOC102723385	ncRNA
9_siCtrl_WDR5_peak_16521	chr8	25316382	25316874	+	987	NA	promoter-TSS (NM_017634)	promoter-TSS (NM_017634)	-121	NM_152562	157313	Hs.33366	NM_152562	ENSG00000184661	CDCA2	PPP1R81|Repo-Man	cell division cycle associated 2	protein-coding
9_siCtrl_WDR5_peak_1103	chr1	161015106	161016325	+	986	NA	promoter-TSS (NM_001276373)	promoter-TSS (NM_001276373)	52	NM_207005	7391	Hs.414880	NM_007122	ENSG00000158773	USF1	FCHL|FCHL1|HYPLIP1|MLTF|MLTFI|UEF|bHLHb11	upstream transcription factor 1	protein-coding
9_siCtrl_WDR5_peak_9558	chr2	50199829	50200280	+	984	NA	intron (NM_001330087, intron 15 of 16)	intron (NM_001330087, intron 15 of 16)	1287	NM_001320157	9378	Hs.637685	NM_004801	ENSG00000179915	NRXN1	Hs.22998|PTHSL2|SCZD17	neurexin 1	protein-coding
9_siCtrl_WDR5_peak_1403	chr1	204485207	204485882	+	984	NA	promoter-TSS (NM_001278516)	promoter-TSS (NM_001278516)	10	NM_002393	4194	Hs.497492	NM_002393	ENSG00000198625	MDM4	HDMX|MDMX|MRP1	MDM4 regulator of p53	protein-coding
9_siCtrl_WDR5_peak_5312	chr14	93455186	93455956	+	984	NA	intron (NM_001142593, intron 5 of 10)	intron (NM_001142593, intron 5 of 10)	47748	NM_001363707	3705	Hs.308122	NM_014216	ENSG00000100605	ITPK1	ITRPK1	inositol-tetrakisphosphate 1-kinase	protein-coding
9_siCtrl_WDR5_peak_9637	chr2	63277288	63278313	+	984	NA	promoter-TSS (NR_130153)	promoter-TSS (NR_130153)	-165	NR_130153	5013	Hs.734360	NM_014562	ENSG00000115507	OTX1	-	orthodenticle homeobox 1	protein-coding
9_siCtrl_WDR5_peak_5768	chr15	64994717	64995799	+	983	NA	5' UTR (NM_001301302, exon 1 of 5)	5' UTR (NM_001301302, exon 1 of 5)	222	NM_001301302	4947	Hs.744924	NM_002537	ENSG00000180304	OAZ2	AZ2	ornithine decarboxylase antizyme 2	protein-coding
9_siCtrl_WDR5_peak_13934	chr5	138088581	138089607	+	982	NA	promoter-TSS (NM_001290310)	promoter-TSS (NM_001290310)	19	NM_001290307	1495	Hs.445981	NM_001903	ENSG00000044115	CTNNA1	CAP102|MDPT2	catenin alpha 1	protein-coding
9_siCtrl_WDR5_peak_7710	chr17	72772049	72773028	+	982	NA	promoter-TSS (NM_017728)	promoter-TSS (NM_017728)	-54	NM_001305079	26151	Hs.144058	NM_015654	ENSG00000109065	NAT9	EBSP, hNATL	N-acetyltransferase 9 (putative)	protein-coding
9_siCtrl_WDR5_peak_11440	chr22	35653348	35654289	+	980	NA	intron (NM_001362972, intron 1 of 9)	CpG	332	NR_027780	10042	Hs.588815	NM_005487	ENSG00000100281	HMGXB4	HMG2L1|HMGBCG|THC211630	HMG-box containing 4	protein-coding
9_siCtrl_WDR5_peak_15213	chr6	144416315	144417280	+	980	NA	promoter-TSS (NM_031287)	promoter-TSS (NM_031287)	-87	NM_031287	83443	Hs.110695	NM_031287	ENSG00000169976	SF3B5	SF3b10|Ysf3	splicing factor 3b subunit 5	protein-coding
9_siCtrl_WDR5_peak_11970	chr3	57741527	57742448	+	979	NA	promoter-TSS (NM_001304420)	promoter-TSS (NM_001304420)	-996	NM_001304421	7871	Hs.476432	NM_007159	ENSG00000163681	SLMAP	SLAP	sarcolemma associated protein	protein-coding
9_siCtrl_WDR5_peak_5873	chr15	72765899	72767882	+	979	NA	promoter-TSS (NR_135678)	promoter-TSS (NR_135678)	219	NM_005744	25820	Hs.268787	NM_005744	ENSG00000166233	ARIH1	ARI|HARI|HHARI|UBCH7BP	ariadne RBR E3 ubiquitin protein ligase 1	protein-coding
9_siCtrl_WDR5_peak_16273	chr7	141437646	141438551	+	979	NA	promoter-TSS (NM_001256513)	promoter-TSS (NM_001256513)	-23	NM_001256511	6742	Hs.490394	NM_003143	ENSG00000106028	SSBP1	Mt-SSB|SOSS-B1|SSBP|mtSSB	single stranded DNA binding protein 1	protein-coding
9_siCtrl_WDR5_peak_1977	chr10	27442972	27444226	+	978	NA	promoter-TSS (NM_014263)	promoter-TSS (NM_014263)	-154	NM_001172303	84930	Hs.276905	NM_032844	ENSG00000120539	MASTL	GREATWALL|GW|GWL|MAST-L|THC2	microtubule associated serine/threonine kinase like	protein-coding
9_siCtrl_WDR5_peak_17247	chr9	21334721	21335632	+	978	NA	5' UTR (NM_018847, exon 1 of 1)	5' UTR (NM_018847, exon 1 of 1)	227	NM_018847	55958	Hs.701778	NM_018847	ENSG00000198642	KLHL9	-	kelch like family member 9	protein-coding
9_siCtrl_WDR5_peak_4880	chr13	109440010	109440866	+	977	NA	intron (NM_015011, intron 5 of 34)	intron (NM_015011, intron 5 of 34)	158479	NM_001198950	23026	Hs.656587	NM_015011	ENSG00000041515	MYO16	MYAP3|MYR8|Myo16b|NYAP3|PPP1R107	myosin XVI	protein-coding
9_siCtrl_WDR5_peak_2816	chr11	32604925	32606206	+	976	NA	intron (NM_001307929, intron 1 of 7)	CpG	188	NM_001307929	10480	Hs.502244	NM_006360	ENSG00000149100	EIF3M	B5|GA17|PCID1|TANGO7|hfl-B5	eukaryotic translation initiation factor 3 subunit M	protein-coding
9_siCtrl_WDR5_peak_8068	chr18	36152627	36153113	+	976	NA	Intergenic	Intergenic	915772	NR_036202	100422857		NR_036202	ENSG00000266530	MIR4318	-	microRNA 4318	ncRNA
9_siCtrl_WDR5_peak_15498	chr7	13451229	13451887	+	976	NA	Intergenic	Intergenic	574581	NM_001163152	2115	Hs.22634	NM_004956	ENSG00000006468	ETV1	ER81	ETS variant 1	protein-coding
9_siCtrl_WDR5_peak_14337	chr6	10694390	10695435	+	975	NA	promoter-TSS (NR_026737)	promoter-TSS (NR_026737)	-63	NR_148536	347744	Hs.61389	NM_001145020	ENSG00000137434	C6orf52	-	chromosome 6 open reading frame 52	protein-coding
9_siCtrl_WDR5_peak_866	chr1	119682511	119683342	+	975	NA	promoter-TSS (NR_125977)	promoter-TSS (NR_125977)	-93	NR_125975	101929147	Hs.697821	NR_125974	ENSG00000231365	WARS2-AS1	-	WARS2 antisense RNA 1	ncRNA
9_siCtrl_WDR5_peak_12211	chr3	123304034	123304617	+	975	NA	promoter-TSS (NM_198402)	promoter-TSS (NM_198402)	-35	NR_038266	100506826	Hs.556600	NR_038266	ENSG00000239523	MYLK-AS1	-	MYLK antisense RNA 1	ncRNA
9_siCtrl_WDR5_peak_12633	chr4	2010390	2011325	+	975	NA	promoter-TSS (NM_005663)	promoter-TSS (NM_005663)	-156	NM_005663	7469	Hs.21771	NM_005663	ENSG00000185049	NELFA	NELF-A|P/OKcl.15|WHSC2	negative elongation factor complex member A	protein-coding
9_siCtrl_WDR5_peak_14041	chr5	153825111	153826105	+	975	NA	promoter-TSS (NR_037897)	promoter-TSS (NR_037897)	51	NM_001131063	79685	Hs.592566	NM_024632	ENSG00000164576	SAP30L	NS4ATP2	SAP30 like	protein-coding
9_siCtrl_WDR5_peak_5847	chr15	70509367	70510431	+	974	NA	Intergenic	MIR3|SINE|MIR	-119643	NM_001282979	7090	Hs.287362	NM_005078	ENSG00000140332	TLE3	ESG|ESG3|GRG3|HsT18976	TLE family member 3, transcriptional corepressor	protein-coding
9_siCtrl_WDR5_peak_17257	chr9	23826155	23826650	+	973	NA	promoter-TSS (NM_001351463)	promoter-TSS (NM_001351463)	-164	NM_001351457	1993	Hs.166109	NM_004432	ENSG00000107105	ELAVL2	HEL-N1|HELN1|HUB	ELAV like RNA binding protein 2	protein-coding
9_siCtrl_WDR5_peak_2906	chr11	47429666	47430160	+	973	NA	promoter-TSS (NM_152264)	promoter-TSS (NM_152264)	-133	NM_152264	91252	Hs.523664	NM_152264	ENSG00000165915	SLC39A13	EDSSPD3|LZT-Hs9|SCDEDS|ZIP13	solute carrier family 39 member 13	protein-coding
9_siCtrl_WDR5_peak_841	chr1	116681180	116681920	+	972	NA	Intergenic	AluSx1|SINE|Alu	27174	NM_152367	126868	Hs.376194	NM_152367	ENSG00000173212	MAB21L3	C1orf161	mab-21 like 3	protein-coding
9_siCtrl_WDR5_peak_7554	chr17	59940258	59941445	+	972	NA	promoter-TSS (NM_032043)	promoter-TSS (NM_032043)	69	NM_032043	83990	Hs.128903	NM_032043	ENSG00000136492	BRIP1	BACH1|FANCJ|OF	BRCA1 interacting protein C-terminal helicase 1	protein-coding
9_siCtrl_WDR5_peak_16214	chr7	133543582	133544360	+	971	NA	intron (NM_021807, intron 11 of 17)	intron (NM_021807, intron 11 of 17)	-34330	NR_120513	101928861	Hs.675747	NR_120513		LOC101928861	-	uncharacterized LOC101928861	ncRNA
9_siCtrl_WDR5_peak_2835	chr11	35684021	35685071	+	970	NA	5' UTR (NM_017583, exon 1 of 5)	5' UTR (NM_017583, exon 1 of 5)	223	NM_017583	54765	Hs.192103	NM_017583	ENSG00000166326	TRIM44	AN3|DIPB|HSA249128|MC7	tripartite motif containing 44	protein-coding
9_siCtrl_WDR5_peak_11594	chr22	46731224	46731978	+	968	NA	promoter-TSS (NM_001282782)	promoter-TSS (NM_001282782)	-10	NM_001282785	55687	Hs.439524	NM_018006	ENSG00000100416	TRMU	LCAL3|MTO2|MTU1|TRMT|TRMT1	tRNA 5-methylaminomethyl-2-thiouridylate methyltransferase	protein-coding
9_siCtrl_WDR5_peak_1136	chr1	163290798	163292201	+	968	NA	promoter-TSS (NM_001254748)	promoter-TSS (NM_001254748)	82	NM_001254748	8490	Hs.24950	NM_003617	ENSG00000143248	RGS5	MST092|MST106|MST129|MSTP032|MSTP092|MSTP106|MSTP129	regulator of G protein signaling 5	protein-coding
9_siCtrl_WDR5_peak_17776	chr9	131842779	131843673	+	967	NA	promoter-TSS (NM_020438)	promoter-TSS (NM_020438)	-164	NR_072983	57171	Hs.21701	NM_020438	ENSG00000167130	DOLPP1	LSFR2	dolichyldiphosphatase 1	protein-coding
9_siCtrl_WDR5_peak_4499	chr12	133841370	133841999	+	967	NA	Intergenic	(TTAGGG)n|Simple_repeat|Simple_repeat	-29262	NM_001191054	647589	Hs.703008	NM_001191054	ENSG00000227059	ANHX	-	anomalous homeobox	protein-coding
9_siCtrl_WDR5_peak_15210	chr6	144164004	144165263	+	967	NA	intron (NM_001329953, intron 1 of 10)	CpG	158	NM_032860	84946	Hs.185675	NM_032860	ENSG00000135521	LTV1	C6orf93|dJ468K18.4	LTV1 ribosome biogenesis factor	protein-coding
9_siCtrl_WDR5_peak_3115	chr11	71813803	71814999	+	966	NA	promoter-TSS (NM_017907)	promoter-TSS (NM_017907)	-58	NM_017907	55004	Hs.731528	NM_017907	ENSG00000149357	LAMTOR1	C11orf59|PDRO|Ragulator1|p18|p27RF-Rho	late endosomal/lysosomal adaptor, MAPK and MTOR activator 1	protein-coding
9_siCtrl_WDR5_peak_2162	chr10	70715347	70716414	+	966	NA	promoter-TSS (NM_001256910)	promoter-TSS (NM_001256910)	-46	NM_004728	9188	Hs.223141	NM_004728	ENSG00000165732	DDX21	GUA|GURDB|RH-II/GU|RH-II/GuA	DExD-box helicase 21	protein-coding
9_siCtrl_WDR5_peak_6189	chr16	619661	620507	+	966	NA	TTS (NM_001301159)	TTS (NM_001301159)	116	NM_004204	9091	Hs.741878	NM_004204	ENSG00000007541	PIGQ	GPI1|c407A10.1	phosphatidylinositol glycan anchor biosynthesis class Q	protein-coding
9_siCtrl_WDR5_peak_1810	chr1	245132936	245134828	+	966	NA	intron (NR_026587, intron 1 of 5)	CpG	251	NR_026587	84288	Hs.134857	NM_032328	ENSG00000203666	EFCAB2	CFAP200|DRC8	EF-hand calcium binding domain 2	protein-coding
9_siCtrl_WDR5_peak_12558	chr3	194489791	194490444	+	965	NA	promoter-TSS (NR_146990)	promoter-TSS (NR_146990)	-679	NR_146990	105374293		NR_146990	ENSG00000230401	LINC01972	-	long intergenic non-protein coding RNA 1972	ncRNA
9_siCtrl_WDR5_peak_3915	chr12	57881568	57882286	+	965	NA	promoter-TSS (NM_004990)	promoter-TSS (NM_004990)	76	NM_004990	4141	Hs.632707	NM_004990	ENSG00000166986	MARS	CMT2U|ILFS2|ILLD|METRS|MRS|MTRNS|SPG70	methionyl-tRNA synthetase	protein-coding
9_siCtrl_WDR5_peak_17328	chr9	37464825	37466954	+	965	NA	promoter-TSS (NM_014872)	promoter-TSS (NM_014872)	-442	NM_014872	9925	Hs.161276	NM_014872	ENSG00000168795	ZBTB5	-	zinc finger and BTB domain containing 5	protein-coding
9_siCtrl_WDR5_peak_7028	chr17	19290477	19291134	+	964	NA	promoter-TSS (NM_001198695)	promoter-TSS (NM_001198695)	-302	NM_001198695	4239	Hs.296049	NM_002404	ENSG00000166482	MFAP4	-	microfibril associated protein 4	protein-coding
9_siCtrl_WDR5_peak_14950	chr6	99872787	99874028	+	964	NA	promoter-TSS (NM_001322418)	promoter-TSS (NM_001322418)	-186	NM_015491	25957	Hs.520287	NM_015491	ENSG00000132424	PNISR	C6orf111|HSPC306|SFRS18|SRrp130|bA98I9.2	PNN interacting serine and arginine rich protein	protein-coding
9_siCtrl_WDR5_peak_11481	chr22	39077632	39078411	+	963	NA	promoter-TSS (NM_020243)	promoter-TSS (NM_020243)	59	NM_020243	56993	Hs.595072	NM_020243	ENSG00000100216	TOMM22	1C9-2|MST065|MSTP065|TOM22	translocase of outer mitochondrial membrane 22	protein-coding
9_siCtrl_WDR5_peak_3567	chr12	12837319	12838030	+	963	NA	intron (NM_006143, intron 2 of 3)	intron (NM_006143, intron 2 of 3)	11443	NM_006143	2842	Hs.657862	NM_006143	ENSG00000183150	GPR19	-	G protein-coupled receptor 19	protein-coding
9_siCtrl_WDR5_peak_4026	chr12	72602688	72603303	+	963	NA	Intergenic	Intergenic	-63534	NM_013381	29953	Hs.199814	NM_013381	ENSG00000072657	TRHDE	PAP-II|PGPEP2|TRH-DE	thyrotropin releasing hormone degrading enzyme	protein-coding
9_siCtrl_WDR5_peak_3421	chr11	125773940	125774695	+	963	NA	promoter-TSS (NM_013264)	promoter-TSS (NM_013264)	-86	NM_013264	29118	Hs.420263	NM_013264	ENSG00000109832	DDX25	GRTH	DEAD-box helicase 25	protein-coding
9_siCtrl_WDR5_peak_10529	chr2	232650716	232651489	+	962	NA	promoter-TSS (NM_022730)	promoter-TSS (NM_022730)	9	NM_001282952	64708	Hs.335061	NM_022730	ENSG00000144524	COPS7B	CSN7B|SGN7b	COP9 signalosome subunit 7B	protein-coding
9_siCtrl_WDR5_peak_5205	chr14	75179420	75180125	+	962	NA	promoter-TSS (NM_001318508)	promoter-TSS (NM_001318508)	11	NM_001039479	9870	Hs.497417	NM_014821	ENSG00000119682	AREL1	FIEL1|KIAA0317	apoptosis resistant E3 ubiquitin protein ligase 1	protein-coding
9_siCtrl_WDR5_peak_8229	chr18	70710432	70710908	+	961	NA	Intergenic	L2a|LINE|L2	174395	NR_134647	100505797	Hs.145111	NR_134647	ENSG00000263958	LOC100505797	-	myosin heavy chain IB-like	ncRNA
9_siCtrl_WDR5_peak_17598	chr9	102860854	102862222	+	961	NA	promoter-TSS (NM_001318382)	promoter-TSS (NM_001318382)	13	NM_014425	27130	Hs.558477	NM_014425	ENSG00000119509	INVS	INV|NPH2|NPHP2	inversin	protein-coding
9_siCtrl_WDR5_peak_10108	chr2	153573340	153575557	+	961	NA	promoter-TSS (NM_001365601)	promoter-TSS (NM_001365601)	41	NR_024526	151188	Hs.643580	NM_152522	ENSG00000177917	ARL6IP6	AIP-6|AIP6|PFAAP1	ADP ribosylation factor like GTPase 6 interacting protein 6	protein-coding
9_siCtrl_WDR5_peak_14150	chr5	170040759	170042005	+	961	NA	intron (NM_014592, intron 1 of 7)	intron (NM_014592, intron 1 of 7)	67092	NR_136214	105377716	Hs.570880	NR_136214	ENSG00000253591	LOC105377716	-	uncharacterized LOC105377716	ncRNA
9_siCtrl_WDR5_peak_14075	chr5	159305849	159306746	+	961	NA	Intergenic	Intergenic	-7906	NR_109891	101927766	Hs.638568	NR_109891	ENSG00000253311	LINC01847	-	long intergenic non-protein coding RNA 1847	ncRNA
9_siCtrl_WDR5_peak_8163	chr18	53705444	53705846	+	961	NA	intron (NR_148972, intron 6 of 8)	intron (NR_148972, intron 6 of 8)	-3864	NR_146510	102724698		NR_146510	ENSG00000267057	LINC01905	-	long intergenic non-protein coding RNA 1905	ncRNA
9_siCtrl_WDR5_peak_15863	chr7	72424763	72425631	+	961	NA	non-coding (NR_033323, exon 1 of 11)	non-coding (NR_033323, exon 1 of 11)	105	NR_033323	260294	Hs.510927	NM_148936	ENSG00000106133	NSUN5P2	NOL1R2|NSUN5C|WBSCR20B|WBSCR20C	NSUN5 pseudogene 2	pseudo
9_siCtrl_WDR5_peak_6292	chr16	5083426	5084215	+	959	NA	non-coding (NR_038913, exon 1 of 2)	non-coding (NR_038913, exon 1 of 2)	116	NM_016256	51172	Hs.21334	NM_016256	ENSG00000103174	NAGPA	APAA|UCE	N-acetylglucosamine-1-phosphodiester alpha-N-acetylglucosaminidase	protein-coding
9_siCtrl_WDR5_peak_2711	chr11	10878555	10880512	+	959	NA	promoter-TSS (NR_034137)	promoter-TSS (NR_034137)	67	NM_021211	58486	Hs.655066	NM_021211	ENSG00000236287	ZBED5	Buster1	zinc finger BED-type containing 5	protein-coding
9_siCtrl_WDR5_peak_8096	chr18	43677744	43678896	+	958	NA	promoter-TSS (NM_001001935)	promoter-TSS (NM_001001935)	-1	NM_001257335	498	Hs.298280	NM_004046	ENSG00000152234	ATP5F1A	ATP5A|ATP5A1|ATP5AL2|ATPM|COXPD22|HEL-S-123m|MC5DN4|MOM2|OMR|ORM|hATP1	ATP synthase F1 subunit alpha	protein-coding
9_siCtrl_WDR5_peak_13663	chr5	77655154	77656320	+	958	NA	promoter-TSS (NM_004866)	promoter-TSS (NM_004866)	628	NR_105014	728769	Hs.586193	NR_105014	ENSG00000245556	SCAMP1-AS1	-	SCAMP1 antisense RNA 1	ncRNA
9_siCtrl_WDR5_peak_15391	chr7	915607	916802	+	958	NA	promoter-TSS (NM_015949)	promoter-TSS (NM_015949)	13	NM_015949	51608	Hs.107387	NM_015949	ENSG00000239857	GET4	C7orf20|CEE|CGI-20|TRC35	guided entry of tail-anchored proteins factor 4	protein-coding
9_siCtrl_WDR5_peak_11857	chr3	47204611	47205533	+	957	NA	promoter-TSS (NR_033373)	promoter-TSS (NR_033373)	395	NM_014159	29072	Hs.517941	NM_012271	ENSG00000181555	SETD2	HBP231|HIF-1|HIP-1|HSPC069|HYPB|KMT3A|LLS|SET2|p231HBP	SET domain containing 2, histone lysine methyltransferase	protein-coding
9_siCtrl_WDR5_peak_7052	chr17	26684195	26685136	+	957	NA	promoter-TSS (NM_015584)	promoter-TSS (NM_015584)	-5	NM_152464	147007	Hs.594696	NM_152464	ENSG00000244045	TMEM199	C17orf32|CDG2P|VMA12|VPH2	transmembrane protein 199	protein-coding
9_siCtrl_WDR5_peak_8443	chr19	10362532	10363158	+	957	NA	promoter-TSS (NM_015956)	promoter-TSS (NM_015956)	-45	NM_015956	51073	Hs.279652	NM_015956	ENSG00000105364	MRPL4	CGI-28|L4mt	mitochondrial ribosomal protein L4	protein-coding
9_siCtrl_WDR5_peak_10601	chr2	242576542	242577615	+	956	NA	promoter-TSS (NM_178326)	promoter-TSS (NM_178326)	-30	NM_178326	23192	Hs.283610	NM_013325	ENSG00000168397	ATG4B	APG4B|AUTL1	autophagy related 4B cysteine peptidase	protein-coding
9_siCtrl_WDR5_peak_17087	chr8	143751137	143751616	+	956	NA	promoter-TSS (NM_003724)	promoter-TSS (NM_003724)	9	NM_001077527	8629	Hs.535903	NM_003724	ENSG00000234616	JRK	JH8|jerky	Jrk helix-turn-helix protein	protein-coding
9_siCtrl_WDR5_peak_3465	chr12	74012	74974	+	956	NA	intron (NR_130745, intron 1 of 10)	CpG	768	NR_130745	100288778	Hs.459573	NR_130745	ENSG00000226210	WASH8P	-	WAS protein family homolog 8, pseudogene	pseudo
9_siCtrl_WDR5_peak_378	chr1	53703747	53704508	+	956	NA	promoter-TSS (NM_002370)	promoter-TSS (NM_002370)	63	NM_002370	4116	Hs.421576	NM_002370	ENSG00000162385	MAGOH	MAGOH1|MAGOHA	mago homolog, exon junction complex subunit	protein-coding
9_siCtrl_WDR5_peak_2274	chr10	88853638	88854728	+	954	NA	promoter-TSS (NM_019054)	promoter-TSS (NM_019054)	-339	NM_001318900	2746	Hs.500409	NM_005271	ENSG00000148672	GLUD1	GDH|GDH1|GLUD	glutamate dehydrogenase 1	protein-coding
9_siCtrl_WDR5_peak_10191	chr2	173099304	173100062	+	953	NA	Intergenic	CpG	131949	NR_126376	104326193	Hs.600690	NR_126376	ENSG00000236651	DLX2-DT	DLX2-AS1|TCONS_00003049	DLX2 divergent transcript	ncRNA
9_siCtrl_WDR5_peak_685	chr1	94344150	94345114	+	953	NA	intron (NM_014597, intron 1 of 6)	CpG	130	NM_014597	30836	Hs.85769	NM_014597	ENSG00000067334	DNTTIP2	ERBP|FCF2|HSU15552|LPTS-RP2|TdIF2	deoxynucleotidyltransferase terminal interacting protein 2	protein-coding
9_siCtrl_WDR5_peak_8989	chr19	50316047	50316977	+	953	NA	promoter-TSS (NM_001352262)	promoter-TSS (NM_001352262)	37	NR_033269	80199	Hs.288800	NM_025129	ENSG00000010361	FUZ	CPLANE3|FY|NTD	fuzzy planar cell polarity protein	protein-coding
9_siCtrl_WDR5_peak_732	chr1	100408860	100409711	+	952	NA	Intergenic	LTR14B|LTR|ERVK	-26267	NM_001271684	23443	Hs.448979	NM_012243	ENSG00000117620	SLC35A3	AMRS	solute carrier family 35 member A3	protein-coding
9_siCtrl_WDR5_peak_16328	chr7	150075879	150076853	+	952	NA	promoter-TSS (NM_173680)	promoter-TSS (NM_173680)	-53	NM_173680	285971	Hs.655734	NM_173680	ENSG00000196456	ZNF775	-	zinc finger protein 775	protein-coding
9_siCtrl_WDR5_peak_14714	chr6	43149108	43150508	+	952	NA	promoter-TSS (NM_015089)	promoter-TSS (NM_015089)	-126	NM_015089	23113	Hs.485434	NM_015089	ENSG00000112659	CUL9	H7AP1|PARC	cullin 9	protein-coding
9_siCtrl_WDR5_peak_16010	chr7	99686203	99687132	+	951	NA	promoter-TSS (NM_006833)	promoter-TSS (NM_006833)	75	NM_006833	10980	Hs.15591	NM_006833	ENSG00000168090	COPS6	CSN6|MOV34-34KD	COP9 signalosome subunit 6	protein-coding
9_siCtrl_WDR5_peak_4503	chr13	20436669	20439025	+	951	NA	promoter-TSS (NM_001142684)	promoter-TSS (NM_001142684)	-58	NM_001142684	9205	Hs.530988	NM_014242	ENSG00000132950	ZMYM5	HSPC050|MYM|ZNF198L1|ZNF237	zinc finger MYM-type containing 5	protein-coding
9_siCtrl_WDR5_peak_18002	chrX	48659584	48660148	+	950	NA	promoter-TSS (NR_135592)	promoter-TSS (NR_135592)	61	NM_001321225	10013	Hs.6764	NM_006044	ENSG00000094631	HDAC6	CPBHM|HD6|JM21|PPP1R90	histone deacetylase 6	protein-coding
9_siCtrl_WDR5_peak_3871	chr12	56222901	56223891	+	949	NA	promoter-TSS (NR_036476)	promoter-TSS (NR_036476)	4	NR_036478	440104	Hs.731828	NM_001013700	ENSG00000182796	TMEM198B	-	transmembrane protein 198B (pseudogene)	pseudo
9_siCtrl_WDR5_peak_983	chr1	151735545	151736592	+	948	NA	promoter-TSS (NM_031420)	promoter-TSS (NM_031420)	-96	NR_125331	65005	Hs.288936	NM_031420	ENSG00000143436	MRPL9	L9mt	mitochondrial ribosomal protein L9	protein-coding
9_siCtrl_WDR5_peak_4443	chr12	127882493	127883023	+	947	NA	Intergenic	MLT1E|LTR|ERVL-MaLR	-58141	NR_110057	101927616	Hs.637827	NR_110057	ENSG00000256362	LINC02375	-	long intergenic non-protein coding RNA 2375	ncRNA
9_siCtrl_WDR5_peak_15824	chr7	69598983	69599477	+	947	NA	intron (NM_001127232, intron 3 of 4)	intron (NM_001127232, intron 3 of 4)	535769	NM_001127232	26053	Hs.21631	NM_015570	ENSG00000158321	AUTS2	FBRSL2|MRD26	activator of transcription and developmental regulator AUTS2	protein-coding
9_siCtrl_WDR5_peak_892	chr1	145096087	145096806	+	945	NA	promoter-TSS (NM_004892)	promoter-TSS (NM_004892)	38	NM_004892	9554	Hs.632438	NM_004892	ENSG00000265808	SEC22B	ERS-24|SEC22L1	SEC22 homolog B, vesicle trafficking protein (gene/pseudogene)	protein-coding
9_siCtrl_WDR5_peak_16179	chr7	129690754	129691631	+	945	NA	promoter-TSS (NM_016478)	promoter-TSS (NM_016478)	33	NM_001363701	51530	Hs.194157	NM_016478	ENSG00000091732	ZC3HC1	HSPC216|NIPA	zinc finger C3HC-type containing 1	protein-coding
9_siCtrl_WDR5_peak_7536	chr17	59222367	59222980	+	945	NA	intron (NM_001353146, intron 23 of 25)	intron (NM_001353146, intron 23 of 25)	222392	NR_136397	101927855	Hs.662123	NR_136397	ENSG00000267131	LOC101927855	-	uncharacterized LOC101927855	ncRNA
9_siCtrl_WDR5_peak_1043	chr1	155278342	155279234	+	944	NA	5' UTR (NM_001135821, exon 1 of 11)	5' UTR (NM_001135821, exon 1 of 11)	131	NM_001242824	2224	Hs.335918	NM_002004	ENSG00000160752	FDPS	FPPS|FPS|POROK9	farnesyl diphosphate synthase	protein-coding
9_siCtrl_WDR5_peak_13768	chr5	110074231	110075369	+	944	NA	promoter-TSS (NM_001303249)	promoter-TSS (NM_001303249)	92	NR_138151	91137	Hs.75639	NM_138773	ENSG00000164209	SLC25A46	HMSN6B	solute carrier family 25 member 46	protein-coding
9_siCtrl_WDR5_peak_18077	chrX	73756281	73757389	+	942	NA	Intergenic	Intergenic	77624	NM_183353	51132	Hs.653288	NM_016120	ENSG00000131263	RLIM	MRX61|NY-REN-43|RNF12|TOKAS	ring finger protein, LIM domain interacting	protein-coding
9_siCtrl_WDR5_peak_7250	chr17	41560954	41561868	+	942	NA	promoter-TSS (NM_001322218)	promoter-TSS (NM_001322218)	68	NM_001302623	1659	Hs.463105	NM_004941	ENSG00000067596	DHX8	DDX8|Dhr2|HRH1|PRP22|PRPF22	DEAH-box helicase 8	protein-coding
9_siCtrl_WDR5_peak_1757	chr1	237911389	237912005	+	942	NA	intron (NM_001035, intron 80 of 104)	LTR16D|LTR|ERVL	-113778	NR_027247	100130331	Hs.661736	NR_027247	ENSG00000237250	LOC100130331	-	POTE ankyrin domain family, member F pseudogene	pseudo
9_siCtrl_WDR5_peak_8299	chr19	1568421	1568828	+	941	NA	promoter-TSS (NM_203304)	promoter-TSS (NM_203304)	-300	NM_001174118	399664	Hs.436495	NM_203304	ENSG00000181588	MEX3D	MEX-3D|MEX3|OK/SW-cl.4|RKHD1|RNF193|TINO	mex-3 RNA binding family member D	protein-coding
9_siCtrl_WDR5_peak_16785	chr8	77315798	77316451	+	941	NA	Intergenic	Intergenic	-2765	NR_105006	101926978	Hs.615028	NR_105006	ENSG00000254300	LINC01111	-	long intergenic non-protein coding RNA 1111	ncRNA
9_siCtrl_WDR5_peak_1113	chr1	161195346	161196364	+	941	NA	promoter-TSS (NM_001286374)	promoter-TSS (NM_001286374)	5	NM_001286374	84134	Hs.321653	NM_032174	ENSG00000158882	TOMM40L	TOMM40B	translocase of outer mitochondrial membrane 40 like	protein-coding
9_siCtrl_WDR5_peak_14215	chr5	176852801	176854332	+	941	NA	promoter-TSS (NM_002082)	promoter-TSS (NM_002082)	-111	NM_001004105	2870	Hs.235116	NM_002082	ENSG00000198055	GRK6	GPRK6	G protein-coupled receptor kinase 6	protein-coding
9_siCtrl_WDR5_peak_10054	chr2	136287673	136289851	+	940	NA	promoter-TSS (NM_032143)	promoter-TSS (NM_032143)	26	NM_032143	84083	Hs.658422	NM_032143	ENSG00000121988	ZRANB3	4933425L19Rik|AH2	zinc finger RANBP2-type containing 3	protein-coding
9_siCtrl_WDR5_peak_16543	chr8	27949968	27950977	+	939	NA	promoter-TSS (NM_001284220)	promoter-TSS (NM_001284220)	-112	NM_001284225	55140	Hs.491336	NM_018091	ENSG00000134014	ELP3	KAT9	elongator acetyltransferase complex subunit 3	protein-coding
9_siCtrl_WDR5_peak_2329	chr10	97889444	97890514	+	938	NA	promoter-TSS (NM_001330738)	promoter-TSS (NM_001330738)	-58	NM_001330736	9849	Hs.600823	NM_014803	ENSG00000177853	ZNF518A	ZNF518	zinc finger protein 518A	protein-coding
9_siCtrl_WDR5_peak_17891	chr9	140472984	140473631	+	938	NA	promoter-TSS (NM_138778)	promoter-TSS (NM_138778)	70	NM_001346389	92715	Hs.292570	NM_138778	ENSG00000148399	DPH7	C9orf112|RRT2|WDR85	diphthamide biosynthesis 7	protein-coding
9_siCtrl_WDR5_peak_3583	chr12	14956040	14956988	+	937	NA	promoter-TSS (NM_016312)	promoter-TSS (NM_016312)	-90	NM_175874	144608	Hs.659951	NM_175874	ENSG00000182993	C12orf60	-	chromosome 12 open reading frame 60	protein-coding
9_siCtrl_WDR5_peak_6212	chr16	1727900	1728865	+	937	NA	TTS (NM_020825)	TTS (NM_020825)	102	NM_144570	90861	Hs.513261	NM_144570	ENSG00000206053	JPT2	C16orf34|HN1L|L11	Jupiter microtubule associated homolog 2	protein-coding
9_siCtrl_WDR5_peak_13354	chr5	1345086	1345719	+	936	NA	promoter-TSS (NM_030782)	promoter-TSS (NM_030782)	-188	NM_030782	81037	Hs.444673	NM_030782	ENSG00000049656	CLPTM1L	CRR9	CLPTM1 like	protein-coding
9_siCtrl_WDR5_peak_11315	chr22	20067150	20068678	+	935	NA	intron (NM_001190326, intron 1 of 12)	GC_rich|Low_complexity|Low_complexity	150	NM_022720	54487	Hs.643452	NM_022720	ENSG00000128191	DGCR8	C22orf12|DGCRK6|Gy1|pasha	DGCR8 microprocessor complex subunit	protein-coding
9_siCtrl_WDR5_peak_5579	chr15	43621965	43623166	+	935	NA	promoter-TSS (NM_001324364)	promoter-TSS (NM_001324364)	16	NM_001324364	161823	Hs.533913	NM_001012969	ENSG00000168803	ADAL	-	adenosine deaminase like	protein-coding
9_siCtrl_WDR5_peak_966	chr1	151042903	151043592	+	935	NA	promoter-TSS (NM_001323912)	promoter-TSS (NM_001323912)	10	NM_001323909	126626	Hs.15671	NM_144618	ENSG00000143458	GABPB2	GABPB-2	GA binding protein transcription factor subunit beta 2	protein-coding
9_siCtrl_WDR5_peak_14291	chr6	3231270	3232465	+	935	NA	non-coding (NR_147505, exon 1 of 2)	non-coding (NR_147505, exon 1 of 2)	230	NR_147505	100422781	Hs.664539	NR_147505		LOC100422781	-	uncharacterized LOC100422781	ncRNA
9_siCtrl_WDR5_peak_2684	chr11	8008485	8009190	+	934	NA	promoter-TSS (NM_003754)	promoter-TSS (NM_003754)	-47	NM_003754	8665	Hs.516023	NM_003754	ENSG00000175390	EIF3F	EIF3S5|MRT67|eIF3-p47	eukaryotic translation initiation factor 3 subunit F	protein-coding
9_siCtrl_WDR5_peak_17988	chrX	47414845	47416065	+	933	NA	Intergenic	Intergenic	-5044	NM_001256196	369	Hs.446641	NM_001654	ENSG00000078061	ARAF	A-RAF|ARAF1|PKS2|RAFA1	A-Raf proto-oncogene, serine/threonine kinase	protein-coding
9_siCtrl_WDR5_peak_5088	chr14	56582119	56583026	+	933	NA	Intergenic	Intergenic	-2557	NM_021255	57161	Hs.657926	NM_021255	ENSG00000139946	PELI2	-	pellino E3 ubiquitin protein ligase family member 2	protein-coding
9_siCtrl_WDR5_peak_16793	chr8	78042836	78043339	+	933	NA	Intergenic	Intergenic	-129807	NM_001172086	5828	Hs.437966	NM_000318	ENSG00000164751	PEX2	PAF1|PBD5A|PBD5B|PMP3|PMP35|PXMP3|RNF72|ZWS3	peroxisomal biogenesis factor 2	protein-coding
9_siCtrl_WDR5_peak_14304	chr6	5003688	5004472	+	932	NA	promoter-TSS (NR_126016)	promoter-TSS (NR_126016)	30	NR_126015	100129461	Hs.131700	NR_126015	ENSG00000272142	LYRM4-AS1	-	LYRM4 antisense RNA 1	ncRNA
9_siCtrl_WDR5_peak_5819	chr15	69111908	69113817	+	932	NA	intron (NM_006305, intron 1 of 6)	CpG	372	NM_006305	8125	Hs.458747	NM_006305	ENSG00000140350	ANP32A	C15orf1|HPPCn|I1PP2A|LANP|MAPM|PHAP1|PHAPI|PP32	acidic nuclear phosphoprotein 32 family member A	protein-coding
9_siCtrl_WDR5_peak_2441	chr10	106028242	106029216	+	930	NA	promoter-TSS (NR_039702)	promoter-TSS (NR_039702)	98	NM_001191013	119391	Hs.107384	NM_183239	ENSG00000065621	GSTO2	GSTO 2-2|bA127L20.1	glutathione S-transferase omega 2	protein-coding
9_siCtrl_WDR5_peak_12240	chr3	127347506	127347949	+	930	NA	promoter-TSS (NM_015720)	promoter-TSS (NM_015720)	-301	NM_015720	50512	Hs.591290	NM_015720	ENSG00000114631	PODXL2	EG|PODLX2	podocalyxin like 2	protein-coding
9_siCtrl_WDR5_peak_7529	chr17	58469008	58470659	+	930	NA	promoter-TSS (NM_032582)	promoter-TSS (NM_032582)	-339	NM_032582	84669	Hs.132868	NM_032582	ENSG00000170832	USP32	NY-REN-60|USP10	ubiquitin specific peptidase 32	protein-coding
9_siCtrl_WDR5_peak_7160	chr17	36908559	36909406	+	929	NA	promoter-TSS (NR_104194)	promoter-TSS (NR_104194)	-12	NR_104194	5691	Hs.82793	NM_002795	ENSG00000277791	PSMB3	HC10-II	proteasome subunit beta 3	protein-coding
9_siCtrl_WDR5_peak_4720	chr13	52733140	52734219	+	929	NA	promoter-TSS (NM_002498)	promoter-TSS (NM_002498)	-9	NM_152720	4752	Hs.409989	NM_002498	ENSG00000136098	NEK3	HSPK36	NIMA related kinase 3	protein-coding
9_siCtrl_WDR5_peak_9123	chr19	58257831	58258676	+	928	NA	promoter-TSS (NR_145328)	promoter-TSS (NR_145328)	70	NM_173632	284309	Hs.720254	NM_173632	ENSG00000152443	ZNF776	-	zinc finger protein 776	protein-coding
9_siCtrl_WDR5_peak_7404	chr17	49008457	49009233	+	928	NA	Intergenic	CpG	-63506	NM_001243877	10140	Hs.703321	NM_005749	ENSG00000141232	TOB1	APRO5|APRO6|PIG49|TOB|TROB|TROB1	transducer of ERBB2, 1	protein-coding
9_siCtrl_WDR5_peak_9201	chr2	5549953	5550460	+	928	NA	Intergenic	Intergenic	281044	NR_110580	102723818	Hs.128107	NR_110580		LINC01248	-	long intergenic non-protein coding RNA 1248	ncRNA
9_siCtrl_WDR5_peak_16756	chr8	71580901	71581928	+	927	NA	promoter-TSS (NM_016027)	promoter-TSS (NM_016027)	6	NM_016027	51110	Hs.118554	NM_016027	ENSG00000147592	LACTB2	CGI-83	lactamase beta 2	protein-coding
9_siCtrl_WDR5_peak_10393	chr2	207307286	207308080	+	927	NA	promoter-TSS (NM_003812)	promoter-TSS (NM_003812)	-573	NM_003812	8745	Hs.370287	NM_003812	ENSG00000114948	ADAM23	MDC-3|MDC3	ADAM metallopeptidase domain 23	protein-coding
9_siCtrl_WDR5_peak_15129	chr6	127839353	127840862	+	927	NA	promoter-TSS (NM_001012279)	promoter-TSS (NM_001012279)	62	NM_001012279	387104	Hs.319247	NM_001012279	ENSG00000255330	SOGA3	C6orf174|dJ403A15.3	SOGA family member 3	protein-coding
9_siCtrl_WDR5_peak_18049	chrX	64754273	64755075	+	926	NA	promoter-TSS (NM_001170649)	promoter-TSS (NM_001170649)	12	NM_031206	81887	Hs.522675	NM_031206	ENSG00000001497	LAS1L	Las1-like|WTS|dJ475B7.2	LAS1 like, ribosome biogenesis factor	protein-coding
9_siCtrl_WDR5_peak_5766	chr15	64679491	64680386	+	926	NA	promoter-TSS (NR_135855)	promoter-TSS (NR_135855)	-52	NR_109934	9768	Hs.81892	NM_014736	ENSG00000166803	PCLAF	KIAA0101|L5|NS5ATP9|OEATC|OEATC-1|OEATC1|PAF|PAF15|p15(PAF)|p15/PAF|p15PAF	PCNA clamp associated factor	protein-coding
9_siCtrl_WDR5_peak_7869	chr17	79669821	79670956	+	925	NA	promoter-TSS (NM_002949)	promoter-TSS (NM_002949)	-9	NM_002949	6182	Hs.109059	NM_002949	ENSG00000262814	MRPL12	5c5-2|L12mt|MRP-L31/34|MRPL7|MRPL7/L12|RPML12	mitochondrial ribosomal protein L12	protein-coding
9_siCtrl_WDR5_peak_9541	chr2	47403020	47404488	+	925	NA	promoter-TSS (NM_001305624)	promoter-TSS (NM_001305624)	8	NM_001305624	805	Hs.468442	NM_001743	ENSG00000143933	CALM2	CALM|CALML2|CAM1|CAM3|CAMC|CAMII|CAMIII|LQT15|PHKD|PHKD2|caM	calmodulin 2	protein-coding
9_siCtrl_WDR5_peak_1649	chr1	228353327	228353931	+	924	NA	promoter-TSS (NR_103540)	promoter-TSS (NR_103540)	124	NM_001010867	200205	Hs.237017	NM_001010867	ENSG00000181873	IBA57	C1orf69|MMDS3|SPG74	iron-sulfur cluster assembly factor IBA57	protein-coding
9_siCtrl_WDR5_peak_9296	chr2	20423112	20424828	+	924	NA	intron (NM_001006946, intron 2 of 5)	CpG	921	NM_002997	6382	Hs.224607	NM_002997	ENSG00000115884	SDC1	CD138|SDC|SYND1|syndecan	syndecan 1	protein-coding
9_siCtrl_WDR5_peak_795	chr1	111505695	111507296	+	924	NA	promoter-TSS (NM_018372)	promoter-TSS (NM_018372)	49	NM_018372	55791	Hs.25245	NM_018372	ENSG00000121931	LRIF1	C1orf103|HBiX1|RIF1	ligand dependent nuclear receptor interacting factor 1	protein-coding
9_siCtrl_WDR5_peak_15324	chr6	160389536	160390236	+	922	NA	promoter-TSS (NM_000876)	promoter-TSS (NM_000876)	-245	NM_000876	3482	Hs.487062	NM_000876	ENSG00000197081	IGF2R	CD222|CI-M6PR|CIMPR|M6P-R|M6P/IGF2R|MPR 300|MPR1|MPR300|MPRI	insulin like growth factor 2 receptor	protein-coding
9_siCtrl_WDR5_peak_12618	chr4	1283066	1284037	+	919	NA	promoter-TSS (NM_001297430)	promoter-TSS (NM_001297430)	-128	NR_123716	10296	Hs.139896	NM_005882	ENSG00000090316	MAEA	EMLP|EMP|GID9|HLC-10|P44EMLP|PIG5	macrophage erythroblast attacher	protein-coding
9_siCtrl_WDR5_peak_4524	chr13	24144117	24144872	+	919	NA	promoter-TSS (NM_148957)	promoter-TSS (NM_148957)	-15	NM_001204459	55504	Hs.149168	NM_018647	ENSG00000127863	TNFRSF19	TAJ|TAJ-alpha|TRADE|TROY	TNF receptor superfamily member 19	protein-coding
9_siCtrl_WDR5_peak_11653	chr3	9437739	9439866	+	919	NA	promoter-TSS (NM_001349451)	promoter-TSS (NM_001349451)	376	NR_132780	440944	Hs.598958	NM_001013713	ENSG00000206573	THUMPD3-AS1	SETD5-AS1	THUMPD3 antisense RNA 1	ncRNA
9_siCtrl_WDR5_peak_17685	chr9	120681735	120682227	+	919	NA	Intergenic	Intergenic	215300	NM_003266	7099	Hs.174312	NM_003266	ENSG00000136869	TLR4	ARMD10|CD284|TLR-4|TOLL	toll like receptor 4	protein-coding
9_siCtrl_WDR5_peak_2778	chr11	22370886	22371686	+	919	NA	intron (NM_020346, intron 3 of 11)	intron (NM_020346, intron 3 of 11)	11359	NM_020346	57084	Hs.242821	NM_020346	ENSG00000091664	SLC17A6	DNPI|VGLUT2	solute carrier family 17 member 6	protein-coding
9_siCtrl_WDR5_peak_11617	chr22	50638737	50639704	+	919	NA	promoter-TSS (NM_031454)	promoter-TSS (NM_031454)	-220	NM_031454	83642	Hs.365405	NM_031454	ENSG00000073169	SELENOO	SELO	selenoprotein O	protein-coding
9_siCtrl_WDR5_peak_11139	chr21	27926700	27927260	+	919	NA	intron (NR_135515, intron 3 of 3)	intron (NR_135515, intron 3 of 3)	18625	NM_001320768	116159	Hs.37445	NM_052954	ENSG00000166265	CYYR1	C21orf95	cysteine and tyrosine rich 1	protein-coding
9_siCtrl_WDR5_peak_13996	chr5	145582692	145583587	+	918	NA	promoter-TSS (NM_018989)	promoter-TSS (NM_018989)	-29	NM_018989	54439	Hs.61441	NM_018989	ENSG00000091009	RBM27	ARRS1|Psc1|ZC3H18|ZC3H20	RNA binding motif protein 27	protein-coding
9_siCtrl_WDR5_peak_7217	chr17	40729013	40730381	+	918	NA	promoter-TSS (NM_001256014)	promoter-TSS (NM_001256014)	37	NM_001256014	29893	Hs.383019	NM_013290	ENSG00000131470	PSMC3IP	GT198|HOP2|HUMGT198A|ODG3|TBPIP	PSMC3 interacting protein	protein-coding
9_siCtrl_WDR5_peak_4355	chr12	121453757	121454502	+	918	NA	intron (NM_001286198, intron 1 of 6)	intron (NM_001286198, intron 1 of 6)	161	NM_001286198	64897	Hs.528671	NM_022895	ENSG00000157895	C12orf43	Custos	chromosome 12 open reading frame 43	protein-coding
9_siCtrl_WDR5_peak_8926	chr19	47614916	47616360	+	918	NA	intron (NM_015168, intron 2 of 14)	CpG	1395	NM_015168	23211	Hs.104661	NM_015168	ENSG00000130749	ZC3H4	C19orf7	zinc finger CCCH-type containing 4	protein-coding
9_siCtrl_WDR5_peak_11504	chr22	41252134	41253458	+	918	NA	promoter-TSS (NM_001204827)	promoter-TSS (NM_001204827)	-153	NM_003932	6767	Hs.712713	NM_003932	ENSG00000100380	ST13	AAG2|FAM10A1|FAM10A4|HIP|HOP|HSPABP|HSPABP1|P48|PRO0786|SNC6	ST13 Hsp70 interacting protein	protein-coding
9_siCtrl_WDR5_peak_17689	chr9	123341991	123343041	+	918	NA	promoter-TSS (NR_073555)	promoter-TSS (NR_073555)	-68	NM_001272039	55755	Hs.269560	NM_018249	ENSG00000136861	CDK5RAP2	C48|Cep215|MCPH3	CDK5 regulatory subunit associated protein 2	protein-coding
9_siCtrl_WDR5_peak_4494	chr12	133656490	133657896	+	917	NA	5' UTR (NM_001300776, exon 1 of 4)	5' UTR (NM_001300776, exon 1 of 4)	404	NM_001300777	7699	Hs.181552	NM_003440	ENSG00000196387	ZNF140	pHZ-39	zinc finger protein 140	protein-coding
9_siCtrl_WDR5_peak_10815	chr20	32307817	32308554	+	916	NA	promoter-TSS (NM_007238)	promoter-TSS (NM_007238)	-69	NM_007238	11264	Hs.654857	NM_007238	ENSG00000101417	PXMP4	PMP24	peroxisomal membrane protein 4	protein-coding
9_siCtrl_WDR5_peak_3776	chr12	49453674	49454954	+	916	NA	Intergenic	CpG	-5207	NM_003482	8085	Hs.731384	NM_003482	ENSG00000167548	KMT2D	AAD10|ALR|CAGL114|KABUK1|KMS|MLL2|MLL4|TNRC21	lysine methyltransferase 2D	protein-coding
9_siCtrl_WDR5_peak_3824	chr12	53400048	53401105	+	916	NA	intron (NM_001417, intron 1 of 14)	CpG	336	NM_001417	1975	Hs.648394	NM_001417	ENSG00000063046	EIF4B	EIF-4B|PRO1843	eukaryotic translation initiation factor 4B	protein-coding
9_siCtrl_WDR5_peak_14987	chr6	107076972	107078065	+	916	NA	promoter-TSS (NM_018292)	promoter-TSS (NM_018292)	65	NM_018292	55278	Hs.406917	NM_018292	ENSG00000130348	QRSL1	GatA	glutaminyl-tRNA amidotransferase subunit QRSL1	protein-coding
9_siCtrl_WDR5_peak_3537	chr12	7282587	7283292	+	915	NA	promoter-TSS (NM_001329454)	promoter-TSS (NM_001329454)	-28	NM_014718	9746	Hs.535378	NM_014718	ENSG00000139182	CLSTN3	CDHR14|CSTN3|alcbeta	calsyntenin 3	protein-coding
9_siCtrl_WDR5_peak_7060	chr17	27046706	27048037	+	915	NA	promoter-TSS (NR_000013)	promoter-TSS (NR_000013)	-197	NR_000013	26808		NR_000013	ENSG00000238423	SNORD42B	RNU42B|U42B	small nucleolar RNA, C/D box 42B	snoRNA
9_siCtrl_WDR5_peak_10202	chr2	175199260	175200101	+	915	NA	promoter-TSS (NM_001145250)	promoter-TSS (NM_001145250)	-2	NM_001145250	100131390		NM_001145250	ENSG00000217236	SP9	ZNF990	Sp9 transcription factor	protein-coding
9_siCtrl_WDR5_peak_9109	chr19	57946266	57946974	+	915	NA	promoter-TSS (NM_001321954)	promoter-TSS (NM_001321954)	-73	NM_001321952	388567	Hs.467358	NM_001023561	ENSG00000186230	ZNF749	-	zinc finger protein 749	protein-coding
9_siCtrl_WDR5_peak_6052	chr15	89009910	89011230	+	915	NA	promoter-TSS (NM_022163)	promoter-TSS (NM_022163)	49	NM_022163	26589	Hs.534261	NM_022163	ENSG00000259494	MRPL46	C15orf4|LIECG2|P2ECSL	mitochondrial ribosomal protein L46	protein-coding
9_siCtrl_WDR5_peak_12383	chr3	156272632	156273498	+	915	NA	promoter-TSS (NM_001308204)	promoter-TSS (NM_001308204)	-76	NM_007107	6747	Hs.518346	NM_007107	ENSG00000114850	SSR3	TRAPG	signal sequence receptor subunit 3	protein-coding
9_siCtrl_WDR5_peak_6250	chr16	2827245	2827947	+	915	NA	promoter-TSS (NM_207013)	promoter-TSS (NM_207013)	-315	NM_007108	6923	Hs.172772	NM_007108	ENSG00000103363	ELOB	SIII|TCEB2	elongin B	protein-coding
9_siCtrl_WDR5_peak_10339	chr2	201753313	201754610	+	912	NA	promoter-TSS (NM_001136039)	promoter-TSS (NM_001136039)	-89	NM_001136039	60491	Hs.145284	NM_021824	ENSG00000196290	NIF3L1	ALS2CR1|CALS-7|MDS015	NGG1 interacting factor 3 like 1	protein-coding
9_siCtrl_WDR5_peak_3554	chr12	10765750	10766405	+	911	NA	promoter-TSS (NM_001300739)	promoter-TSS (NM_001300739)	131	NR_135121	55110	Hs.104650	NM_018048	ENSG00000111196	MAGOHB	MGN2|mago|magoh	mago homolog B, exon junction complex subunit	protein-coding
9_siCtrl_WDR5_peak_10119	chr2	158695251	158696400	+	911	NA	promoter-TSS (NM_001347667)	promoter-TSS (NM_001347667)	-683	NM_001347667	90	Hs.470316	NM_001105	ENSG00000115170	ACVR1	ACTRI|ACVR1A|ACVRLK2|ALK2|FOP|SKR1|TSRI	activin A receptor type 1	protein-coding
9_siCtrl_WDR5_peak_3326	chr11	113367816	113368463	+	911	NA	Intergenic	Intergenic	-22019	NM_000795	1813	Hs.73893	NM_000795	ENSG00000149295	DRD2	D2DR|D2R	dopamine receptor D2	protein-coding
9_siCtrl_WDR5_peak_5362	chr14	100339999	100340396	+	910	NA	intron (NM_004434, intron 3 of 21)	L2b|LINE|L2	80447	NM_004434	2009	Hs.12451	NM_004434	ENSG00000066629	EML1	BH|ELP79|EMAP|EMAPL|HuEMAP	EMAP like 1	protein-coding
9_siCtrl_WDR5_peak_4988	chr14	31676123	31677666	+	910	NA	5' UTR (NM_015382, exon 1 of 43)	5' UTR (NM_015382, exon 1 of 43)	105	NM_015382	25831	Hs.708017	NM_015382	ENSG00000092148	HECTD1	EULIR	HECT domain E3 ubiquitin protein ligase 1	protein-coding
9_siCtrl_WDR5_peak_6567	chr16	49598655	49599256	+	910	NA	intron (NM_001330533, intron 3 of 5)	intron (NM_001330533, intron 3 of 5)	-46459	NR_144553	1596	Hs.684517	NR_144553	ENSG00000260089	ADAM3B	CYRN2	ADAM metallopeptidase domain 3B (pseudogene)	pseudo
9_siCtrl_WDR5_peak_7284	chr17	42885050	42885567	+	910	NA	intron (NM_001080383, intron 1 of 2)	intron (NM_001080383, intron 1 of 2)	22347	NM_005497	10052	Hs.712052	NM_005497	ENSG00000182963	GJC1	CX45|GJA7	gap junction protein gamma 1	protein-coding
9_siCtrl_WDR5_peak_1642	chr1	227751007	227751826	+	909	NA	exon (NM_001367911, exon 1 of 3)	exon (NM_001367911, exon 1 of 3)	159	NM_001367911	339500	Hs.30323	NM_032755	ENSG00000181450	ZNF678	-	zinc finger protein 678	protein-coding
9_siCtrl_WDR5_peak_8475	chr19	11639510	11640057	+	909	NA	promoter-TSS (NM_001243204)	promoter-TSS (NM_001243204)	-103	NM_001243204	51295	Hs.515146	NM_016581	ENSG00000130159	ECSIT	SITPEC	ECSIT signalling integrator	protein-coding
9_siCtrl_WDR5_peak_13562	chr5	64919706	64921360	+	909	NA	promoter-TSS (NM_001365341)	promoter-TSS (NM_001365341)	-25	NM_001243737	80006	Hs.591760	NM_024941	ENSG00000113597	TRAPPC13	C5orf44|SHLD3	trafficking protein particle complex 13	protein-coding
9_siCtrl_WDR5_peak_10677	chr20	8112684	8113650	+	909	NA	5' UTR (NM_015192, exon 1 of 32)	5' UTR (NM_015192, exon 1 of 32)	254	NM_182734	23236	Hs.431173	NM_015192	ENSG00000182621	PLCB1	EIEE12|PI-PLC|PLC-154|PLC-I|PLC-beta-1|PLC154|PLCB1A|PLCB1B	phospholipase C beta 1	protein-coding
9_siCtrl_WDR5_peak_15628	chr7	35292956	35294079	+	908	NA	5' UTR (NM_001077653, exon 1 of 8)	5' UTR (NM_001077653, exon 1 of 8)	194	NM_001166220	57057	Hs.404167	NM_020417	ENSG00000164532	TBX20	ASD4	T-box transcription factor 20	protein-coding
9_siCtrl_WDR5_peak_7658	chr17	70771605	70772526	+	906	NA	intron (NM_001352691, intron 7 of 10)	intron (NM_001352691, intron 7 of 10)	-135454	NR_033876	400619	Hs.447555	NR_033876	ENSG00000227036	LINC00511	LCAL5|onco-lncRNA-12	long intergenic non-protein coding RNA 511	ncRNA
9_siCtrl_WDR5_peak_7898	chr17	80415954	80417048	+	906	NA	promoter-TSS (NM_012336)	promoter-TSS (NM_012336)	-39	NM_031968	26502	Hs.256526	NM_012336	ENSG00000141562	NARF	IOP2	nuclear prelamin A recognition factor	protein-coding
9_siCtrl_WDR5_peak_17639	chr9	111881483	111882579	+	906	NA	exon (NM_032012, exon 1 of 18)	exon (NM_032012, exon 1 of 18)	196	NM_032012	23731	Hs.308074	NM_032012	ENSG00000106771	TMEM245	C9orf5|CG-2|CG2	transmembrane protein 245	protein-coding
9_siCtrl_WDR5_peak_3318	chr11	112742436	112743521	+	906	NA	Intergenic	Intergenic	-89164	NM_181351	4684	Hs.503878	NM_000615	ENSG00000149294	NCAM1	CD56|MSK39|NCAM	neural cell adhesion molecule 1	protein-coding
9_siCtrl_WDR5_peak_11796	chr3	38206291	38207345	+	905	NA	promoter-TSS (NM_005109)	promoter-TSS (NM_005109)	-210	NM_005109	9943	Hs.475970	NM_005109	ENSG00000172939	OXSR1	OSR1	oxidative stress responsive kinase 1	protein-coding
9_siCtrl_WDR5_peak_3327	chr11	113390657	113391622	+	905	NA	Intergenic	Intergenic	-45019	NM_000795	1813	Hs.73893	NM_000795	ENSG00000149295	DRD2	D2DR|D2R	dopamine receptor D2	protein-coding
9_siCtrl_WDR5_peak_8387	chr19	5790498	5791296	+	905	NA	intron (NM_020175, intron 1 of 12)	CpG	277	NM_020175	56931	Hs.284297	NM_020175	ENSG00000141994	DUS3L	DUS3	dihydrouridine synthase 3 like	protein-coding
9_siCtrl_WDR5_peak_16315	chr7	148958717	148960007	+	905	NA	promoter-TSS (NR_144366)	promoter-TSS (NR_144366)	75	NM_001195220	100289678	Hs.490512	NM_001195220	ENSG00000204946	ZNF783	-	zinc finger family member 783	protein-coding
9_siCtrl_WDR5_peak_4863	chr13	103248356	103249990	+	905	NA	promoter-TSS (NM_001367947)	promoter-TSS (NM_001367947)	-163	NM_003291	7174	Hs.432424	NM_003291	ENSG00000134900	TPP2	TPP-2|TPP-II|TPPII	tripeptidyl peptidase 2	protein-coding
9_siCtrl_WDR5_peak_11327	chr22	21212118	21213728	+	904	NA	promoter-TSS (NM_004782)	promoter-TSS (NM_004782)	176	NM_058004	5297	Hs.529438	NM_002650	ENSG00000241973	PI4KA	PI4K-ALPHA|PIK4CA|PMGYCHA|pi4K230	phosphatidylinositol 4-kinase alpha	protein-coding
9_siCtrl_WDR5_peak_17157	chr9	2843784	2844599	+	904	NA	promoter-TSS (NM_014878)	promoter-TSS (NM_014878)	-96	NM_014878	9933	Hs.493309	NM_014878	ENSG00000080608	PUM3	HA-8|HLA-HA8|KIAA0020|PEN|PUF-A|PUF6|XTP5	pumilio RNA binding family member 3	protein-coding
9_siCtrl_WDR5_peak_2310	chr10	94753433	94753973	+	903	NA	intron (NM_001319195, intron 18 of 21)	intron (NM_001319195, intron 18 of 21)	-66852	NM_183374	340665	Hs.369993	NM_183374	ENSG00000187553	CYP26C1	FFDD4	cytochrome P450 family 26 subfamily C member 1	protein-coding
9_siCtrl_WDR5_peak_9324	chr2	24269928	24270765	+	902	NA	promoter-TSS (NM_025203)	promoter-TSS (NM_025203)	-50	NM_001142319	80304	Hs.24624	NM_025203	ENSG00000163026	WDCP	C2orf44|MMAP|PP384	WD repeat and coiled coil containing	protein-coding
9_siCtrl_WDR5_peak_15890	chr7	75071533	75072401	+	902	NA	intron (NM_001099415, intron 3 of 14)	CpG	32362	NR_104013	155400	Hs.436034	NM_001039575	ENSG00000223705	NSUN5P1	NSUN5B|WBSCR20B	NSUN5 pseudogene 1	pseudo
9_siCtrl_WDR5_peak_2012	chr10	32667358	32667996	+	902	NA	promoter-TSS (NM_001282391)	promoter-TSS (NM_001282391)	20	NM_001282391	80314	Hs.167805	NM_025209	ENSG00000120616	EPC1	Epl1	enhancer of polycomb homolog 1	protein-coding
9_siCtrl_WDR5_peak_14296	chr6	3568374	3569022	+	901	NA	Intergenic	Intergenic	-111905	NM_015482	63027	Hs.713588	NM_015482	ENSG00000137266	SLC22A23	C6orf85	solute carrier family 22 member 23	protein-coding
9_siCtrl_WDR5_peak_9252	chr2	10829640	10830522	+	900	NA	promoter-TSS (NM_001261392)	promoter-TSS (NM_001261392)	20	NM_024894	79954	Hs.222494	NM_024894	ENSG00000115761	NOL10	PQBP5	nucleolar protein 10	protein-coding
9_siCtrl_WDR5_peak_16599	chr8	37238051	37238838	+	900	NA	intron (NR_031672, intron 2 of 2).2	intron (NR_031672, intron 2 of 2).2	112987	NR_121620	100507420	Hs.105962	NR_121620		LINC01605	LincDUSP	long intergenic non-protein coding RNA 1605	ncRNA
9_siCtrl_WDR5_peak_3840	chr12	54019628	54020370	+	899	NA	promoter-TSS (NM_001366556)	promoter-TSS (NM_001366556)	167	NM_001366561	11016	Hs.12286	NM_006856	ENSG00000170653	ATF7	ATFA	activating transcription factor 7	protein-coding
9_siCtrl_WDR5_peak_12109	chr3	101395232	101396243	+	899	NA	exon (NM_014415, exon 1 of 11)	exon (NM_014415, exon 1 of 11)	239	NM_014415	27107	Hs.655286	NM_014415	ENSG00000066422	ZBTB11	MRT69|ZNF-U69274|ZNF913	zinc finger and BTB domain containing 11	protein-coding
9_siCtrl_WDR5_peak_4931	chr14	21905102	21905793	+	898	NA	promoter-TSS (NM_020920)	promoter-TSS (NM_020920)	-13	NM_020920	57680	Hs.530698	NM_020920	ENSG00000100888	CHD8	AUTS18|HELSNF1	chromodomain helicase DNA binding protein 8	protein-coding
9_siCtrl_WDR5_peak_4504	chr13	20531573	20533114	+	897	NA	promoter-TSS (NM_001353165)	promoter-TSS (NM_001353165)	-467	NM_197968	7750	Hs.507433	NM_003453	ENSG00000121741	ZMYM2	FIM|MYM|RAMP|SCLL|ZNF198	zinc finger MYM-type containing 2	protein-coding
9_siCtrl_WDR5_peak_1736	chr1	235291359	235292531	+	897	NA	promoter-TSS (NR_002956)	promoter-TSS (NR_002956)	207	NM_014765	9804	Hs.533192	NM_014765	ENSG00000173726	TOMM20	MAS20|MOM19|TOM20	translocase of outer mitochondrial membrane 20	protein-coding
9_siCtrl_WDR5_peak_12364	chr3	150264395	150264978	+	897	NA	promoter-TSS (NM_014445)	promoter-TSS (NM_014445)	112	NM_032025	83939	Hs.655782	NM_032025	ENSG00000144895	EIF2A	CDA02|EIF-2A|MST089|MSTP004|MSTP089	eukaryotic translation initiation factor 2A	protein-coding
9_siCtrl_WDR5_peak_9825	chr2	86422011	86423327	+	896	NA	5' UTR (NM_001100169, exon 1 of 15)	5' UTR (NM_001100169, exon 1 of 15)	224	NM_006839	10989	Hs.148559	NM_006839	ENSG00000132305	IMMT	HMP|MICOS60|MINOS2|Mic60|P87|P87/89|P89|PIG4|PIG52	inner membrane mitochondrial protein	protein-coding
9_siCtrl_WDR5_peak_3846	chr12	54411757	54412684	+	896	NA	intron (NM_014620, intron 1 of 3)	intron (NM_014620, intron 1 of 3)	1548	NR_003084	3222	Hs.549040	NM_018953	ENSG00000172789	HOXC5	CP11|HOX3|HOX3D	homeobox C5	protein-coding
9_siCtrl_WDR5_peak_17130	chr8	145911244	145911947	+	896	NA	promoter-TSS (NM_001308208)	promoter-TSS (NM_001308208)	-364	NM_001308208	80728	Hs.148988	NM_025251	ENSG00000147799	ARHGAP39	CrGAP|Vilse	Rho GTPase activating protein 39	protein-coding
9_siCtrl_WDR5_peak_15867	chr7	72935674	72937074	+	896	NA	5' UTR (NM_032408, exon 1 of 20)	5' UTR (NM_032408, exon 1 of 20)	249	NM_001370402	9031	Hs.743372	NM_023005	ENSG00000009954	BAZ1B	WBSCR10|WBSCR9|WSTF	bromodomain adjacent to zinc finger domain 1B	protein-coding
9_siCtrl_WDR5_peak_8514	chr19	13029744	13030223	+	895	NA	intron (NM_001105578, intron 1 of 5)	CpG	124	NM_001105578	256126	Hs.655173	NM_001105578	ENSG00000161860	SYCE2	CESC1	synaptonemal complex central element protein 2	protein-coding
9_siCtrl_WDR5_peak_9630	chr2	62081313	62082381	+	895	NA	promoter-TSS (NM_001201543)	promoter-TSS (NM_001201543)	-652	NR_037710	84140	Hs.440466	NM_032180	ENSG00000170264	FAM161A	RP28	FAM161 centrosomal protein A	protein-coding
9_siCtrl_WDR5_peak_2864	chr11	44192879	44193455	+	895	NA	exon (NM_207122, exon 8 of 14)	exon (NM_207122, exon 8 of 14)	75420	NM_000401	2132	Hs.368404	NM_000401	ENSG00000151348	EXT2	SOTV|SSMS	exostosin glycosyltransferase 2	protein-coding
9_siCtrl_WDR5_peak_17151	chr9	2234299	2235323	+	893	NA	Intergenic	Intergenic	76355	NM_001289400	6595	Hs.298990	NM_003070	ENSG00000080503	SMARCA2	BAF190|BRM|NCBRS|SNF2|SNF2L2|SNF2LA|SWI2|Sth1p|hBRM|hSNF2a	SWI/SNF related, matrix associated, actin dependent regulator of chromatin, subfamily a, member 2	protein-coding
9_siCtrl_WDR5_peak_14792	chr6	58287202	58287983	+	893	NA	intron (NR_132995, intron 1 of 5)	CpG-22260	132	NR_132997	106660613	Hs.561539	NR_003660	ENSG00000283352	LINC00680-GUSBP4	-	LINC00680-GUSBP4 readthrough	pseudo
9_siCtrl_WDR5_peak_2	chr1	28784	29583	+	892	NA	intron (NR_024540, intron 1 of 10)	CpG	187	NR_024540	653635	Hs.446466	NR_024540		WASH7P	FAM39F|WASH5P	WASP family homolog 7, pseudogene	pseudo
9_siCtrl_WDR5_peak_16062	chr7	102212653	102213226	+	892	NA	exon (NM_001097615, exon 1 of 9)	exon (NM_001097615, exon 1 of 9)	129	NM_001097615	548644	Hs.610255	NM_001015884	ENSG00000168255	POLR2J3	POLR2J2|RPB11b1|RPB11b2	RNA polymerase II subunit J3	protein-coding
9_siCtrl_WDR5_peak_15836	chr7	69995093	69995799	+	892	NA	intron (NM_015570, intron 5 of 18)	intron (NM_015570, intron 5 of 18)	-601684	NM_022479	64409	Hs.488591	NM_022479	ENSG00000185274	GALNT17	GALNACT17|GALNT16|GALNT20|GALNTL3|GalNAc-T17|GalNAc-T19|GalNAc-T5L|WBSCR17	polypeptide N-acetylgalactosaminyltransferase 17	protein-coding
9_siCtrl_WDR5_peak_4198	chr12	107167677	107168975	+	891	NA	promoter-TSS (NM_001330147)	promoter-TSS (NM_001330147)	-134	NR_147131	55188	Hs.131306	NM_018157	ENSG00000111785	RIC8B	RIC8|hSyn	RIC8 guanine nucleotide exchange factor B	protein-coding
9_siCtrl_WDR5_peak_12903	chr4	77996425	77997519	+	891	NA	promoter-TSS (NM_001348133)	promoter-TSS (NM_001348133)	153	NM_001348140	10983	Hs.518827	NM_006835	ENSG00000118816	CCNI	CCNI1|CYC1|CYI	cyclin I	protein-coding
9_siCtrl_WDR5_peak_3059	chr11	66035980	66036788	+	890	NA	intron (NM_030981, intron 1 of 5)	CpG	274	NM_030981	81876	Hs.300816	NM_030981	ENSG00000174903	RAB1B	-	RAB1B, member RAS oncogene family	protein-coding
9_siCtrl_WDR5_peak_10532	chr2	233415026	233416018	+	889	NA	promoter-TSS (NM_145702)	promoter-TSS (NM_145702)	6	NM_001330202	9470	Hs.292026	NM_004846	ENSG00000135930	EIF4E2	4E-LP|4EHP|EIF4EL3|IF4e|h4EHP	eukaryotic translation initiation factor 4E family member 2	protein-coding
9_siCtrl_WDR5_peak_2717	chr11	11484933	11485369	+	889	NA	intron (NM_001363464, intron 1 of 9)	intron (NM_001363464, intron 1 of 9)	-110354	NM_001256686	283106	Hs.654675	NM_001256686	ENSG00000254598	CSNK2A3	CSNK2A1P	casein kinase 2 alpha 3	protein-coding
9_siCtrl_WDR5_peak_8756	chr19	37328598	37329724	+	888	NA	promoter-TSS (NM_001242802)	promoter-TSS (NM_001242802)	128	NM_206894	388536	Hs.282067	NM_206894	ENSG00000197863	ZNF790	-	zinc finger protein 790	protein-coding
9_siCtrl_WDR5_peak_8557	chr19	15489829	15491084	+	888	NA	TTS (NR_111971)	TTS (NR_111971)	142	NM_005858	10270	Hs.594496	NM_005858	ENSG00000105127	AKAP8	AKAP 95|AKAP-8|AKAP-95|AKAP95	A-kinase anchoring protein 8	protein-coding
9_siCtrl_WDR5_peak_10756	chr20	23401818	23402686	+	888	NA	promoter-TSS (NR_104266)	promoter-TSS (NR_104266)	-96	NM_001283018	63908	Hs.269471	NM_022080	ENSG00000125814	NAPB	SNAP-BETA|SNAPB	NSF attachment protein beta	protein-coding
9_siCtrl_WDR5_peak_2417	chr10	104261724	104262823	+	888	NA	intron (NM_005736, intron 1 of 10)	CpG	196	NM_005736	10121	Hs.153961	NM_005736	ENSG00000138107	ACTR1A	ARP1|Arp1A|CTRN1	actin related protein 1A	protein-coding
9_siCtrl_WDR5_peak_607	chr1	84944410	84945475	+	888	NA	promoter-TSS (NM_025065)	promoter-TSS (NM_025065)	-7	NM_025065	80135	Hs.481202	NM_025065	ENSG00000117133	RPF1	BXDC5	ribosome production factor 1 homolog	protein-coding
9_siCtrl_WDR5_peak_5224	chr14	76584125	76584629	+	888	NA	Intergenic	Intergenic	-33851	NM_001322029	55668	Hs.410231	NM_017926	ENSG00000089916	GPATCH2L	C14orf118	G-patch domain containing 2 like	protein-coding
9_siCtrl_WDR5_peak_3146	chr11	73587458	73588578	+	888	NA	promoter-TSS (NM_001267805)	promoter-TSS (NM_001267805)	-26	NM_025155	80227	Hs.525017	NM_025155	ENSG00000175575	PAAF1	PAAF|Rpn14|WDR71	proteasomal ATPase associated factor 1	protein-coding
9_siCtrl_WDR5_peak_8648	chr19	21579609	21580324	+	888	NA	promoter-TSS (NM_145326)	promoter-TSS (NM_145326)	31	NM_175910	284443	Hs.656558	NM_145326	ENSG00000196268	ZNF493	-	zinc finger protein 493	protein-coding
9_siCtrl_WDR5_peak_1123	chr1	161735920	161736485	+	888	NA	promoter-TSS (NM_007348)	promoter-TSS (NM_007348)	92	NM_007348	22926	Hs.492740	NM_007348	ENSG00000118217	ATF6	ACHM7|ATF6A	activating transcription factor 6	protein-coding
9_siCtrl_WDR5_peak_2903	chr11	47270101	47270926	+	887	NA	promoter-TSS (NM_001357016)	promoter-TSS (NM_001357016)	67	NM_001130102	10062	Hs.438863	NM_005693	ENSG00000025434	NR1H3	LXR-a|LXRA|RLD-1	nuclear receptor subfamily 1 group H member 3	protein-coding
9_siCtrl_WDR5_peak_10627	chr20	1446933	1447736	+	887	NA	intron (NM_001206736, intron 1 of 8)	CpG	1003	NM_001206736	55968	Hs.12865	NM_016143	ENSG00000088833	NSFL1C	P47|UBX1|UBXD10|UBXN2C|dJ776F14.1	NSFL1 cofactor	protein-coding
9_siCtrl_WDR5_peak_11655	chr3	9773102	9773921	+	887	NA	promoter-TSS (NM_004634)	promoter-TSS (NM_004634)	77	NM_004634	7862	Hs.1004	NM_004634	ENSG00000156983	BRPF1	BR140|IDDDFP	bromodomain and PHD finger containing 1	protein-coding
9_siCtrl_WDR5_peak_17303	chr9	35102258	35103435	+	887	NA	intron (NM_001287032, intron 1 of 9)	CpG	282	NM_013442	30968	Hs.3439	NM_013442	ENSG00000165283	STOML2	HSPC108|SLP-2	stomatin like 2	protein-coding
9_siCtrl_WDR5_peak_12327	chr3	141867508	141868808	+	887	NA	5' UTR (NM_001178138, exon 1 of 14)	5' UTR (NM_001178138, exon 1 of 14)	228	NM_001178138	7029	Hs.379018	NM_006286	ENSG00000114126	TFDP2	DP2	transcription factor Dp-2	protein-coding
9_siCtrl_WDR5_peak_17832	chr9	135819499	135820664	+	887	NA	promoter-TSS (NM_000368)	promoter-TSS (NM_000368)	-61	NM_000368	7248	Hs.370854	NM_000368	ENSG00000165699	TSC1	LAM|TSC	TSC complex subunit 1	protein-coding
9_siCtrl_WDR5_peak_1114	chr1	161244277	161245196	+	887	NA	intron (NM_001102566, intron 1 of 2)	intron (NM_001102566, intron 1 of 2)	16201	NM_001102566	654790	Hs.433150	NM_001102566	ENSG00000248485	PCP4L1	IQM1	Purkinje cell protein 4 like 1	protein-coding
9_siCtrl_WDR5_peak_8903	chr19	46087312	46088112	+	887	NA	intron (NM_025136, intron 1 of 1)	intron (NM_025136, intron 1 of 1)	348	NM_025136	80207	Hs.466945	NM_025136	ENSG00000125741	OPA3	MGA3	outer mitochondrial membrane lipid metabolism regulator OPA3	protein-coding
9_siCtrl_WDR5_peak_6222	chr16	2021645	2022317	+	887	NA	promoter-TSS (NM_006453)	promoter-TSS (NM_006453)	-73	NM_006453	10607	Hs.513267	NM_006453	ENSG00000183751	TBL3	SAZD|UTP13	transducin beta like 3	protein-coding
9_siCtrl_WDR5_peak_11968	chr3	57678284	57679275	+	886	NA	promoter-TSS (NM_152678)	promoter-TSS (NM_152678)	25	NM_152678	201627	Hs.91085	NM_152678	ENSG00000174839	DENND6A	AFI1A|FAM116A	DENN domain containing 6A	protein-coding
9_siCtrl_WDR5_peak_1895	chr10	13389123	13390099	+	885	NA	intron (NM_012247, intron 1 of 8)	intron (NM_012247, intron 1 of 8)	682	NM_012247	22929	Hs.124027	NM_012247	ENSG00000086475	SEPHS1	SELD|SPS|SPS1	selenophosphate synthetase 1	protein-coding
9_siCtrl_WDR5_peak_9264	chr2	12095533	12096463	+	885	NA	Intergenic	Intergenic	-51244	NR_110196	100506457	Hs.197824	NR_110196	ENSG00000224184	MIR3681HG	-	MIR3681 host gene	ncRNA
9_siCtrl_WDR5_peak_7886	chr17	80023368	80024100	+	884	NA	promoter-TSS (NM_022156)	promoter-TSS (NM_022156)	-54	NM_022156	64118	Hs.514599	NM_022156	ENSG00000169718	DUS1L	DUS1|PP3111	dihydrouridine synthase 1 like	protein-coding
9_siCtrl_WDR5_peak_16340	chr7	150924068	150925005	+	884	NA	promoter-TSS (NM_007189)	promoter-TSS (NM_007189)	-76	NM_005692	114483834	Hs.654958	NM_005692		LOC114483834	-	ABCF2-H2B readthrough	protein-coding
9_siCtrl_WDR5_peak_6471	chr16	29801813	29802666	+	883	NA	promoter-TSS (NM_001256270)	promoter-TSS (NM_001256270)	-50	NM_001256270	3835	Hs.612151	NM_007317	ENSG00000079616	KIF22	A-328A3.2|KID|KNSL4|OBP|OBP-1|OBP-2|SEMDJL2	kinesin family member 22	protein-coding
9_siCtrl_WDR5_peak_3700	chr12	38710296	38710932	+	883	NA	promoter-TSS (NM_001308340)	promoter-TSS (NM_001308340)	38	NM_001013620	144245	Hs.259305	NM_001013620	ENSG00000175548	ALG10B	ALG10|KCR1	ALG10 alpha-1,2-glucosyltransferase B	protein-coding
9_siCtrl_WDR5_peak_4018	chr12	70636648	70638197	+	882	NA	promoter-TSS (NR_037615)	promoter-TSS (NR_037615)	-72	NR_037615	4848	Hs.133350	NM_014515	ENSG00000111596	CNOT2	CDC36|HSPC131|NOT2|NOT2H	CCR4-NOT transcription complex subunit 2	protein-coding
9_siCtrl_WDR5_peak_11598	chr22	47157973	47158989	+	881	NA	promoter-TSS (NM_001284303)	promoter-TSS (NM_001284303)	-33	NM_001284304	25771	Hs.435044	NM_014346	ENSG00000054611	TBC1D22A	C22orf4|HSC79E021	TBC1 domain family member 22A	protein-coding
9_siCtrl_WDR5_peak_6937	chr17	8197930	8198694	+	880	NA	non-coding (NR_135483, exon 1 of 7)	non-coding (NR_135483, exon 1 of 7)	349	NM_001320877	399512	Hs.118918	NM_201520	ENSG00000125434	SLC25A35	-	solute carrier family 25 member 35	protein-coding
9_siCtrl_WDR5_peak_12365	chr3	150321089	150321768	+	880	NA	intron (NM_016275, intron 1 of 5)	CpG	320	NM_016275	51714	Hs.369052	NM_016275	ENSG00000198843	SELENOT	SELT	selenoprotein T	protein-coding
9_siCtrl_WDR5_peak_7266	chr17	42218997	42219888	+	880	NA	5' UTR (NM_001171251, exon 1 of 10)	5' UTR (NM_001171251, exon 1 of 10)	144	NM_001171251	78995	Hs.437059	NM_024032	ENSG00000125319	C17orf53	-	chromosome 17 open reading frame 53	protein-coding
9_siCtrl_WDR5_peak_5008	chr14	35451816	35452498	+	880	NA	promoter-TSS (NM_003136)	promoter-TSS (NM_003136)	-41	NM_003136	6729	Hs.167535	NM_003136	ENSG00000100883	SRP54	-	signal recognition particle 54	protein-coding
9_siCtrl_WDR5_peak_2875	chr11	45070376	45071266	+	880	NA	Intergenic	Intergenic	-44743	NM_001359633	56981	Hs.178715	NM_001256695	ENSG00000019485	PRDM11	PFM8	PR/SET domain 11	protein-coding
9_siCtrl_WDR5_peak_3551	chr12	9599576	9601319	+	879	NA	intron (NR_033399, intron 1 of 26)	CpG	321	NR_033399	440081	Hs.447869	NM_004400		DDX12P	CHLR2|DDX12	DEAD/H-box helicase 12, pseudogene	pseudo
9_siCtrl_WDR5_peak_13003	chr4	100815170	100815874	+	878	NA	promoter-TSS (NM_021970)	promoter-TSS (NM_021970)	62	NM_021970	8649	Hs.433332	NM_021970	ENSG00000109270	LAMTOR3	MAP2K1IP1|MAPBP|MAPKSP1|MP1|PRO0633|Ragulator3	late endosomal/lysosomal adaptor, MAPK and MTOR activator 3	protein-coding
9_siCtrl_WDR5_peak_14655	chr6	37427655	37428390	+	878	NA	intron (NM_015050, intron 10 of 23)	intron (NM_015050, intron 10 of 23)	27025	NM_015050	23070	Hs.520102	NM_015050	ENSG00000137200	CMTR1	FTSJD2|KIAA0082|MTr1|hMTr1	cap methyltransferase 1	protein-coding
9_siCtrl_WDR5_peak_17160	chr9	3524813	3527408	+	878	NA	promoter-TSS (NM_001282116)	promoter-TSS (NM_001282116)	-109	NM_001282116	5991	Hs.136829	NM_002919	ENSG00000080298	RFX3	-	regulatory factor X3	protein-coding
9_siCtrl_WDR5_peak_14110	chr5	168006112	168006967	+	878	NA	promoter-TSS (NM_024594)	promoter-TSS (NM_024594)	-166	NM_024594	79646	Hs.388400	NM_024594	ENSG00000120137	PANK3	-	pantothenate kinase 3	protein-coding
9_siCtrl_WDR5_peak_5876	chr15	73075590	73076961	+	878	NA	promoter-TSS (NM_001365225)	promoter-TSS (NM_001365225)	-176	NM_001365228	83440	Hs.562587	NM_031284	ENSG00000159322	ADPGK	2610017G09Rik|ADP-GK	ADP dependent glucokinase	protein-coding
9_siCtrl_WDR5_peak_4948	chr14	23503693	23504557	+	878	NA	promoter-TSS (NM_002797)	promoter-TSS (NM_002797)	-16	NM_002797	5693	Hs.422990	NM_002797	ENSG00000100804	PSMB5	LMPX|MB1|X	proteasome subunit beta 5	protein-coding
9_siCtrl_WDR5_peak_10971	chr20	47662852	47663844	+	878	NA	promoter-TSS (NR_110624)	promoter-TSS (NR_110624)	499	NM_001316	1434	Hs.90073	NM_001316	ENSG00000124207	CSE1L	CAS|CSE1|XPO2	chromosome segregation 1 like	protein-coding
9_siCtrl_WDR5_peak_12400	chr3	159206229	159206694	+	877	NA	intron (NM_001197108, intron 1 of 6)	intron (NM_001197108, intron 1 of 6)	206026	NR_037483	100500803		NR_037483	ENSG00000263634	MIR3919	-	microRNA 3919	ncRNA
9_siCtrl_WDR5_peak_9863	chr2	97481564	97482292	+	877	NA	promoter-TSS (NM_017623)	promoter-TSS (NM_017623)	-77	NM_017623	26505	Hs.711617	NM_017623	ENSG00000168763	CNNM3	ACDP3	cyclin and CBS domain divalent metal cation transport mediator 3	protein-coding
9_siCtrl_WDR5_peak_4024	chr12	72233122	72234278	+	877	NA	intron (NR_027449, intron 1 of 15)	intron (NR_027449, intron 1 of 15)	161	NR_027449	64786	Hs.284630	NM_022771	ENSG00000121749	TBC1D15	RAB7-GAP	TBC1 domain family member 15	protein-coding
9_siCtrl_WDR5_peak_16862	chr8	93639713	93640507	+	877	NA	intron (NR_125827, intron 3 of 4)	intron (NR_125827, intron 3 of 4)	27612	NR_125827	102724710	Hs.125714	NR_125827	ENSG00000253634	LOC102724710	-	uncharacterized LOC102724710	ncRNA
9_siCtrl_WDR5_peak_12933	chr4	82729158	82729755	+	877	NA	Intergenic	Intergenic	-336395	NM_001300736	153020	Hs.591696	NM_152545	ENSG00000138670	RASGEF1B	GPIG4	RasGEF domain family member 1B	protein-coding
9_siCtrl_WDR5_peak_14407	chr6	20706995	20707585	+	877	NA	intron (NM_017774, intron 5 of 15)	intron (NM_017774, intron 5 of 15)	172602	NM_017774	54901	Hs.657604	NM_017774	ENSG00000145996	CDKAL1	-	CDK5 regulatory subunit associated protein 1 like 1	protein-coding
9_siCtrl_WDR5_peak_16463	chr8	17103613	17104918	+	876	NA	promoter-TSS (NM_152415)	promoter-TSS (NM_152415)	101	NM_001322094	29883	Hs.587465	NM_013354	ENSG00000198791	CNOT7	CAF-1|CAF1|Caf1a|hCAF-1	CCR4-NOT transcription complex subunit 7	protein-coding
9_siCtrl_WDR5_peak_3522	chr12	6832772	6834056	+	876	NA	promoter-TSS (NM_001164093)	promoter-TSS (NM_001164093)	-39	NM_001164093	50813	Hs.530823	NM_016319	ENSG00000111652	COPS7A	CSN7|CSN7A|SGN7a	COP9 signalosome subunit 7A	protein-coding
9_siCtrl_WDR5_peak_357	chr1	52498546	52499633	+	875	NA	non-coding (NR_046405, exon 3 of 3)	non-coding (NR_046405, exon 3 of 3)	393	NM_138417	112970	Hs.476033	NM_138417	ENSG00000198841	KTI12	SBBI81|TOT4	KTI12 chromatin associated homolog	protein-coding
9_siCtrl_WDR5_peak_6389	chr16	21831328	21832355	+	875	NA	Intergenic	CpG	-1346	NR_003370	730092	Hs.31290	NR_003370		RRN3P1	-	RRN3 homolog, RNA polymerase I transcription factor pseudogene 1	pseudo
9_siCtrl_WDR5_peak_8497	chr19	12551275	12552373	+	875	NA	promoter-TSS (NM_005815)	promoter-TSS (NM_005815)	11	NM_005815	10224	Hs.636894	NM_005815	ENSG00000180855	ZNF443	ZK1	zinc finger protein 443	protein-coding
9_siCtrl_WDR5_peak_11993	chr3	62304161	62305313	+	874	NA	promoter-TSS (NM_001291942)	promoter-TSS (NM_001291942)	40	NM_001291942	57415	Hs.47166	NM_020685	ENSG00000114405	C3orf14	HT021	chromosome 3 open reading frame 14	protein-coding
9_siCtrl_WDR5_peak_7896	chr17	80376203	80376796	+	874	NA	promoter-TSS (NR_033265)	promoter-TSS (NR_033265)	-37	NM_175902	79701	Hs.187505	NM_024648	ENSG00000181396	OGFOD3	C17orf101	2-oxoglutarate and iron dependent oxygenase domain containing 3	protein-coding
9_siCtrl_WDR5_peak_8263	chr19	507198	508109	+	874	NA	exon (NM_033513, exon 1 of 2)	exon (NM_033513, exon 1 of 2)	156	NM_033513	91978	Hs.369613	NM_033513	ENSG00000141933	TPGS1	C19orf20|GTRGEO22|PGs1	tubulin polyglutamylase complex subunit 1	protein-coding
9_siCtrl_WDR5_peak_16069	chr7	102789379	102790373	+	874	NA	promoter-TSS (NM_001122838)	promoter-TSS (NM_001122838)	-330	NM_001122838	222236	Hs.324271	NM_198990	ENSG00000161048	NAPEPLD	C7orf18|FMP30|NAPE-PLD	N-acyl phosphatidylethanolamine phospholipase D	protein-coding
9_siCtrl_WDR5_peak_8367	chr19	4723423	4724169	+	873	NA	promoter-TSS (NM_001365987)	promoter-TSS (NM_001365987)	58	NM_139159	91039	Hs.515081	NM_139159	ENSG00000142002	DPP9	DP9|DPLP9|DPP IX|DPRP-2|DPRP2	dipeptidyl peptidase 9	protein-coding
9_siCtrl_WDR5_peak_2736	chr11	14541269	14542343	+	872	NA	intron (NM_148976, intron 2 of 10)	CpG	185	NM_001143937	5682	Hs.102798	NM_002786	ENSG00000129084	PSMA1	HC2|HEL-S-275|NU|PROS30	proteasome subunit alpha 1	protein-coding
9_siCtrl_WDR5_peak_1296	chr1	184723231	184724600	+	872	NA	promoter-TSS (NM_001319960)	promoter-TSS (NM_001319960)	77	NM_001319960	80267	Hs.523811	NM_025191	ENSG00000116406	EDEM3	C1orf22	ER degradation enhancing alpha-mannosidase like protein 3	protein-coding
9_siCtrl_WDR5_peak_11217	chr21	40357628	40358277	+	872	NA	Intergenic	Intergenic	-8252	NR_109962	101928435	Hs.385528	NR_109962	ENSG00000232837	LINC01700	-	long intergenic non-protein coding RNA 1700	ncRNA
9_siCtrl_WDR5_peak_11003	chr20	49772899	49773716	+	870	NA	Intergenic	MIRb|SINE|MIR	-133663	NM_002237	3755	Hs.118695	NM_002237	ENSG00000026559	KCNG1	K13|KCNG|KV6.1|kH2	potassium voltage-gated channel modifier subfamily G member 1	protein-coding
9_siCtrl_WDR5_peak_14836	chr6	79787638	79788649	+	870	NA	promoter-TSS (NM_017934)	promoter-TSS (NM_017934)	-172	NM_017934	55023	Hs.511817	NM_017934	ENSG00000146247	PHIP	BRWD2|DCAF14|DIDOD|WDR11|ndrp	pleckstrin homology domain interacting protein	protein-coding
9_siCtrl_WDR5_peak_10203	chr2	175259932	175260970	+	870	NA	promoter-TSS (NM_004882)	promoter-TSS (NM_004882)	-6	NM_001193528	79634	Hs.470679	NM_024583	ENSG00000144306	SCRN3	SES3	secernin 3	protein-coding
9_siCtrl_WDR5_peak_6261	chr16	3184264	3185430	+	870	NA	promoter-TSS (NM_004220)	promoter-TSS (NM_004220)	36	NR_110900	100507458	Hs.522143	NR_110900		ZNF213-AS1	-	ZNF213 antisense RNA 1 (head to head)	ncRNA
9_siCtrl_WDR5_peak_6209	chr16	1524541	1525490	+	869	NA	promoter-TSS (NM_001287)	promoter-TSS (NM_001287)	14	NM_001287	1186	Hs.459649	NM_001287	ENSG00000103249	CLCN7	CLC-7|CLC7|OPTA2|OPTB4|PPP1R63	chloride voltage-gated channel 7	protein-coding
9_siCtrl_WDR5_peak_9269	chr2	13756339	13757210	+	869	NA	Intergenic	MLT1A1|LTR|ERVL-MaLR	-609636	NR_038434	100506474	Hs.242196	NR_038434	ENSG00000225649	LOC100506474	-	uncharacterized LOC100506474	ncRNA
9_siCtrl_WDR5_peak_16228	chr7	135242392	135243477	+	869	NA	intron (NM_015135, intron 1 of 42)	intron (NM_015135, intron 1 of 42)	269	NM_015135	23165	Hs.743250	NM_015135	ENSG00000155561	NUP205	C7orf14|NPHS13	nucleoporin 205	protein-coding
9_siCtrl_WDR5_peak_6005	chr15	83418635	83419971	+	868	NA	promoter-TSS (NR_110099)	promoter-TSS (NR_110099)	-13	NR_110100	100505616	Hs.513091	NR_110096	ENSG00000250988	SNHG21	FSD2-AS1|SCARNA15HG	small nucleolar RNA host gene 21	ncRNA
9_siCtrl_WDR5_peak_839	chr1	116512129	116512623	+	868	NA	intron (NR_125970, intron 1 of 4)	intron (NR_125970, intron 1 of 4)	-6758	NM_018420	55356	Hs.125482	NM_018420	ENSG00000163393	SLC22A15	FLIPT1|PRO34686	solute carrier family 22 member 15	protein-coding
9_siCtrl_WDR5_peak_10357	chr2	203102625	203103568	+	868	NA	intron (NR_163943, intron 1 of 5)	CpG	224	NM_001005782	7341	Hs.81424	NM_003352	ENSG00000116030	SUMO1	DAP1|GMP1|OFC10|PIC1|SENP2|SMT3|SMT3C|SMT3H3|UBL1	small ubiquitin like modifier 1	protein-coding
9_siCtrl_WDR5_peak_10708	chr20	16710302	16711355	+	868	NA	intron (NM_003092, intron 1 of 6)	CpG	157	NM_003092	6629	Hs.280378	NM_003092	ENSG00000125870	SNRPB2	Msl1|U2B''	small nuclear ribonucleoprotein polypeptide B2	protein-coding
9_siCtrl_WDR5_peak_1254	chr1	180471254	180472318	+	868	NA	promoter-TSS (NM_032360)	promoter-TSS (NM_032360)	-74	NM_032360	84320	Hs.200051	NM_032360	ENSG00000230124	ACBD6	-	acyl-CoA binding domain containing 6	protein-coding
9_siCtrl_WDR5_peak_1522	chr1	214537872	214538763	+	868	NA	intron (NM_005401, intron 17 of 18)	intron (NM_005401, intron 17 of 18)	83815	NM_020197	56950	Hs.66170	NM_020197	ENSG00000143499	SMYD2	HSKM-B|KMT3C|ZMYND14	SET and MYND domain containing 2	protein-coding
9_siCtrl_WDR5_peak_17761	chr9	131133184	131133966	+	867	NA	promoter-TSS (NM_001135947)	promoter-TSS (NM_001135947)	-23	NM_001265582	81605	Hs.495229	NM_030914	ENSG00000167118	URM1	C9orf74	ubiquitin related modifier 1	protein-coding
9_siCtrl_WDR5_peak_4066	chr12	82751663	82752664	+	867	NA	promoter-TSS (NM_001319675)	promoter-TSS (NM_001319675)	3	NM_014167	29080	Hs.582627	NM_014167	ENSG00000133773	CCDC59	BR22|HSPC128|TAP26	coiled-coil domain containing 59	protein-coding
9_siCtrl_WDR5_peak_5503	chr15	34516777	34517663	+	867	NA	promoter-TSS (NM_001286420)	promoter-TSS (NM_001286420)	3	NM_001286420	51234	Hs.250905	NM_016454	ENSG00000128463	EMC4	PIG17|TMEM85	ER membrane protein complex subunit 4	protein-coding
9_siCtrl_WDR5_peak_2953	chr11	61196933	61197887	+	866	NA	promoter-TSS (NM_024811)	promoter-TSS (NM_024811)	-27	NM_024811	79869	Hs.718984	NM_024811	ENSG00000149532	CPSF7	CFIm59	cleavage and polyadenylation specific factor 7	protein-coding
9_siCtrl_WDR5_peak_3698	chr12	34175122	34175766	+	866	NA	promoter-TSS (NM_032834)	promoter-TSS (NM_032834)	13	NM_032834	84920	Hs.102971	NM_032834	ENSG00000139133	ALG10	ALG10A|DIE2|KCR1	ALG10 alpha-1,2-glucosyltransferase	protein-coding
9_siCtrl_WDR5_peak_11343	chr22	22020121	22020784	+	866	NA	intron (NM_014337, intron 1 of 19)	CpG	151	NM_148175	23759	Hs.438587	NM_014337	ENSG00000100023	PPIL2	CYC4|CYP60|Cyp-60|UBOX7|hCyP-60	peptidylprolyl isomerase like 2	protein-coding
9_siCtrl_WDR5_peak_5582	chr15	43784661	43785659	+	866	NA	intron (NM_005657, intron 1 of 27)	intron (NM_005657, intron 1 of 27)	194	NM_001141980	7158	Hs.440968	NM_005657	ENSG00000067369	TP53BP1	53BP1|TDRD30|p202|p53BP1	tumor protein p53 binding protein 1	protein-coding
9_siCtrl_WDR5_peak_17405	chr9	72748631	72749315	+	866	NA	intron (NM_001347990, intron 7 of 11)	intron (NM_001347990, intron 7 of 11)	41831	NR_040076	100507244	Hs.556816	NR_040076	ENSG00000204706	MAMDC2-AS1	-	MAMDC2 antisense RNA 1	ncRNA
9_siCtrl_WDR5_peak_15578	chr7	28581842	28582576	+	866	NA	intron (NM_182898, intron 4 of 10)	intron (NM_182898, intron 4 of 10)	106975	NM_004904	9586	Hs.437075	NM_004904	ENSG00000146592	CREB5	CRE-BPA|CREB-5|CREBPA	cAMP responsive element binding protein 5	protein-coding
9_siCtrl_WDR5_peak_7069	chr17	27277911	27279625	+	865	NA	promoter-TSS (NM_001033561)	promoter-TSS (NM_001033561)	-232	NM_020889	57649	Hs.444173	NM_020889	ENSG00000109118	PHF12	PF1	PHD finger protein 12	protein-coding
9_siCtrl_WDR5_peak_8582	chr19	17419984	17420967	+	865	NA	intron (NM_024050, intron 1 of 4)	intron (NM_024050, intron 1 of 4)	103	NM_024050	79016	Hs.466154	NM_024050	ENSG00000130311	DDA1	C19orf58|PCIA1	DET1 and DDB1 associated 1	protein-coding
9_siCtrl_WDR5_peak_6185	chr16	420276	420736	+	865	NA	promoter-TSS (NM_006428)	promoter-TSS (NM_006428)	32	NM_006428	10573	Hs.513230	NM_006428	ENSG00000086504	MRPL28	MAAT1|p15	mitochondrial ribosomal protein L28	protein-coding
9_siCtrl_WDR5_peak_10912	chr20	44044448	44045094	+	865	NA	promoter-TSS (NR_047691)	promoter-TSS (NR_047691)	-10	NR_047693	51604	Hs.437388	NM_015937	ENSG00000124155	PIGT	CGI-06|MCAHS3|NDAP|PNH2	phosphatidylinositol glycan anchor biosynthesis class T	protein-coding
9_siCtrl_WDR5_peak_8764	chr19	37742227	37743176	+	864	NA	promoter-TSS (NR_110718)	promoter-TSS (NR_110718)	-86	NR_110719	101927667	Hs.633102	NR_110718	ENSG00000226686	LINC01535	-	long intergenic non-protein coding RNA 1535	ncRNA
9_siCtrl_WDR5_peak_14427	chr6	23003772	23004838	+	864	NA	Intergenic	Intergenic	-286152	NR_134613	105374972	Hs.484889	NR_134613		LOC105374972	-	uncharacterized LOC105374972	ncRNA
9_siCtrl_WDR5_peak_15955	chr7	91763311	91764657	+	864	NA	promoter-TSS (NM_000786)	promoter-TSS (NM_000786)	75	NM_001146152	1595	Hs.417077	NM_000786	ENSG00000001630	CYP51A1	CP51|CYP51|CYPL1|LDM|P450-14DM|P450L1	cytochrome P450 family 51 subfamily A member 1	protein-coding
9_siCtrl_WDR5_peak_12541	chr3	193310467	193311710	+	863	NA	promoter-TSS (NM_130831)	promoter-TSS (NM_130831)	91	NM_001354664	4976	Hs.594504	NM_015560	ENSG00000198836	OPA1	BERHS|MGM1|MTDPS14|NPG|NTG|largeG	OPA1 mitochondrial dynamin like GTPase	protein-coding
9_siCtrl_WDR5_peak_842	chr1	116907224	116908853	+	863	NA	Intergenic	Intergenic	-7828	NM_000701	476	Hs.371889	NM_000701	ENSG00000163399	ATP1A1	CMT2DD|HOMGSMR2	ATPase Na+/K+ transporting subunit alpha 1	protein-coding
9_siCtrl_WDR5_peak_6611	chr16	56484740	56485944	+	863	NA	promoter-TSS (NM_018233)	promoter-TSS (NM_018233)	-94	NM_001324361	55239	Hs.231883	NM_018233	ENSG00000087263	OGFOD1	TPA1	2-oxoglutarate and iron dependent oxygenase domain containing 1	protein-coding
9_siCtrl_WDR5_peak_15176	chr6	137753116	137753984	+	863	NA	Intergenic	Intergenic	61981	NM_175747	167826	Hs.195398	NM_175747	ENSG00000177468	OLIG3	Bhlhb7|bHLHe20	oligodendrocyte transcription factor 3	protein-coding
9_siCtrl_WDR5_peak_4792	chr13	80376698	80377282	+	863	NA	Intergenic	Intergenic	-1531	NR_125785	102724076	Hs.208617	NR_125785	ENSG00000229011	LINC01038	-	long intergenic non-protein coding RNA 1038	ncRNA
9_siCtrl_WDR5_peak_6041	chr15	87316997	87317469	+	863	NA	intron (NM_152336, intron 23 of 24)	intron (NM_152336, intron 23 of 24)	-158878	NR_135682	105370954	Hs.668501	NR_135682	ENSG00000259636	LOC105370954	-	uncharacterized LOC105370954	ncRNA
9_siCtrl_WDR5_peak_9990	chr2	122512927	122513601	+	861	NA	promoter-TSS (NM_004622)	promoter-TSS (NM_004622)	37	NM_004622	7247	Hs.75066	NM_004622	ENSG00000211460	TSN	BCLF-1|C3PO|RCHF1|REHF-1|TBRBP|TRSLN	translin	protein-coding
9_siCtrl_WDR5_peak_7998	chr18	20824152	20824694	+	861	NA	intron (NM_001256438, intron 7 of 9)	intron (NM_001256438, intron 7 of 9)	88634	NM_138375	91768	Hs.11108	NM_138375	ENSG00000134508	CABLES1	CABL1|CABLES|HsT2563|IK3-1	Cdk5 and Abl enzyme substrate 1	protein-coding
9_siCtrl_WDR5_peak_5681	chr15	55879515	55881401	+	861	NA	promoter-TSS (NM_001330326)	promoter-TSS (NM_001330326)	85	NM_001330326	26108	Hs.87194	NM_015617	ENSG00000171016	PYGO1	-	pygopus family PHD finger 1	protein-coding
9_siCtrl_WDR5_peak_11884	chr3	49141749	49142589	+	861	NA	promoter-TSS (NR_073590)	promoter-TSS (NR_073590)	21	NM_005051	5859	Hs.79322	NM_005051	ENSG00000172053	QARS	GLNRS|MSCCA|PRO2195	glutaminyl-tRNA synthetase	protein-coding
9_siCtrl_WDR5_peak_11275	chr21	47705708	47706691	+	861	NA	promoter-TSS (NM_001314025)	promoter-TSS (NM_001314025)	-45	NM_001314026	54059	Hs.474066	NM_058181	ENSG00000182362	YBEY	C21orf57	ybeY metalloendoribonuclease	protein-coding
9_siCtrl_WDR5_peak_793	chr1	110949781	110950678	+	860	NA	promoter-TSS (NR_102697)	promoter-TSS (NR_102697)	-202	NR_102697	101410535	Hs.559121	NR_102697		LAMTOR5-AS1	-	LAMTOR5 antisense RNA 1	ncRNA
9_siCtrl_WDR5_peak_7208	chr17	40306519	40307279	+	860	NA	intron (NM_201434, intron 1 of 6)	intron (NM_201434, intron 1 of 6)	108	NM_001252039	5878	Hs.650382	NM_004583	ENSG00000108774	RAB5C	L1880|RAB5CL|RAB5L|RABL	RAB5C, member RAS oncogene family	protein-coding
9_siCtrl_WDR5_peak_15394	chr7	1199522	1200500	+	859	NA	promoter-TSS (NM_001365381)	promoter-TSS (NM_001365381)	1	NR_110066	101927021	Hs.529566	NR_110065		LOC101927021	-	uncharacterized LOC101927021	ncRNA
9_siCtrl_WDR5_peak_13242	chr4	170948467	170949138	+	859	NA	Intergenic	CpG	-1256	NM_021647	9848	Hs.593942	NM_021647	ENSG00000198948	MFAP3L	NYD-sp9	microfibril associated protein 3 like	protein-coding
9_siCtrl_WDR5_peak_2846	chr11	36310635	36311238	+	859	NA	promoter-TSS (NM_014186)	promoter-TSS (NM_014186)	38	NM_001307937	29099	Hs.99443	NM_014186	ENSG00000110442	COMMD9	C11orf55|HSPC166|LINC00610	COMM domain containing 9	protein-coding
9_siCtrl_WDR5_peak_10885	chr20	39766244	39767235	+	858	NA	promoter-TSS (NR_109889)	promoter-TSS (NR_109889)	-99	NR_109889	101927117	Hs.668593	NR_109889	ENSG00000226648	PLCG1-AS1	TOP1-AS1	PLCG1 antisense RNA 1	ncRNA
9_siCtrl_WDR5_peak_9503	chr2	44222598	44223788	+	858	NA	promoter-TSS (NM_133259)	promoter-TSS (NM_133259)	-65	NM_133259	10128	Hs.368084	NM_133259	ENSG00000138095	LRPPRC	CLONE-23970|GP130|LRP130|LSFC	leucine rich pentatricopeptide repeat containing	protein-coding
9_siCtrl_WDR5_peak_1394	chr1	203764473	203765664	+	858	NA	intron (NM_001350264, intron 1 of 17)	CpG	403	NM_001319239	9877	Hs.532399	NM_014827	ENSG00000058673	ZC3H11A	ZC3HDC11A	zinc finger CCCH-type containing 11A	protein-coding
9_siCtrl_WDR5_peak_17825	chr9	135363927	135364490	+	858	NA	intron (NM_207417, intron 2 of 6)	intron (NM_207417, intron 2 of 6)	78610	NM_207417	389799	Hs.201709	NM_207417	ENSG00000188523	CFAP77	C9orf171	cilia and flagella associated protein 77	protein-coding
9_siCtrl_WDR5_peak_13068	chr4	120375508	120376329	+	857	NA	promoter-TSS (NR_135112)	promoter-TSS (NR_135112)	-20	NR_037630	645513	Hs.677546	NR_037630	ENSG00000245958	LOC645513	-	septin 7 pseudogene	pseudo
9_siCtrl_WDR5_peak_7191	chr17	38573722	38574738	+	856	NA	promoter-TSS (NM_001067)	promoter-TSS (NM_001067)	-82	NM_001067	7153	Hs.156346	NM_001067	ENSG00000131747	TOP2A	TOP2|TP2A	DNA topoisomerase II alpha	protein-coding
9_siCtrl_WDR5_peak_4859	chr13	101326760	101327428	+	856	NA	promoter-TSS (NM_001350577)	promoter-TSS (NM_001350577)	-45	NR_146794	84899	Hs.190983	NM_032813	ENSG00000125247	TMTC4	-	transmembrane O-mannosyltransferase targeting cadherins 4	protein-coding
9_siCtrl_WDR5_peak_6477	chr16	30006641	30007859	+	855	NA	promoter-TSS (NM_001304562)	promoter-TSS (NM_001304562)	167	NM_001197323	8479	Hs.567370	NM_003609	ENSG00000149929	HIRIP3	-	HIRA interacting protein 3	protein-coding
9_siCtrl_WDR5_peak_11940	chr3	53381155	53381955	+	855	NA	promoter-TSS (NM_001290206)	promoter-TSS (NM_001290206)	15	NM_001290205	55802	Hs.476353	NM_018403	ENSG00000272886	DCP1A	HSA275986|Nbla00360|SMAD4IP1|SMIF	decapping mRNA 1A	protein-coding
9_siCtrl_WDR5_peak_4979	chr14	24911261	24912467	+	855	NA	promoter-TSS (NR_110032)	promoter-TSS (NR_110032)	143	NM_020195	56948	Hs.643552	NM_020195	ENSG00000100445	SDR39U1	C14orf124|HCDI	short chain dehydrogenase/reductase family 39U member 1	protein-coding
9_siCtrl_WDR5_peak_5611	chr15	45694044	45695751	+	855	NA	promoter-TSS (NM_001321015)	promoter-TSS (NM_001321015)	363	NM_024063	79029	Hs.369657	NM_024063	ENSG00000171763	SPATA5L1	-	spermatogenesis associated 5 like 1	protein-coding
9_siCtrl_WDR5_peak_11517	chr22	41864187	41865614	+	855	NA	promoter-TSS (NM_032758)	promoter-TSS (NM_032758)	-204	NM_032758	84844	Hs.474980	NM_032758	ENSG00000100410	PHF5A	INI|Rds3|SAP14b|SF3B7|SF3b14b|bK223H9.2	PHD finger protein 5A	protein-coding
9_siCtrl_WDR5_peak_7325	chr17	44656268	44657639	+	855	NA	intron (NM_001113738, intron 1 of 3).2	CpG	125	NM_001039083	100506084	Hs.559259	NM_001039083	ENSG00000228696	ARL17B	ARL17|ARL17A	ADP ribosylation factor like GTPase 17B	protein-coding
9_siCtrl_WDR5_peak_595	chr1	78147943	78149632	+	855	NA	promoter-TSS (NM_015534)	promoter-TSS (NM_015534)	325	NM_001308237	26009	Hs.480506	NM_015534	ENSG00000036549	ZZZ3	ATAC1	zinc finger ZZ-type containing 3	protein-coding
9_siCtrl_WDR5_peak_7794	chr17	76374447	76375130	+	854	NA	promoter-TSS (NR_110601)	promoter-TSS (NR_110601)	58	NR_110602	9489	Hs.654671	NM_024419	ENSG00000087157	PGS1	-	phosphatidylglycerophosphate synthase 1	protein-coding
9_siCtrl_WDR5_peak_8865	chr19	44439119	44439828	+	853	NA	promoter-TSS (NM_003425)	promoter-TSS (NM_003425)	-39	NM_003425	7596	Hs.381285	NM_003425	ENSG00000124459	ZNF45	KOX5|ZNF13	zinc finger protein 45	protein-coding
9_siCtrl_WDR5_peak_14578	chr6	31926379	31927235	+	851	NA	promoter-TSS (NM_002904).4	promoter-TSS (NM_002904).4	-59	NM_002904	7936	Hs.423935	NM_002904	ENSG00000204356	NELFE	D6S45|NELF-E|RD|RDBP|RDP	negative elongation factor complex member E	protein-coding
9_siCtrl_WDR5_peak_6991	chr17	17183829	17184664	+	851	NA	promoter-TSS (NM_001199125)	promoter-TSS (NM_001199125)	-234	NM_001199125	8533	Hs.6076	NM_003653	ENSG00000141030	COPS3	CSN3|SGN3	COP9 signalosome subunit 3	protein-coding
9_siCtrl_WDR5_peak_2559	chr10	124913327	124914320	+	851	NA	promoter-TSS (NM_004725)	promoter-TSS (NM_004725)	63	NM_001007793	9184	Hs.418533	NM_004725	ENSG00000154473	BUB3	BUB3L|hBUB3	BUB3 mitotic checkpoint protein	protein-coding
9_siCtrl_WDR5_peak_9508	chr2	44907434	44908099	+	850	NA	intron (NM_024766, intron 3 of 10)	intron (NM_024766, intron 3 of 10)	258261	NR_147194	107985879	Hs.436392	NR_147194	ENSG00000259439	LINC01833	K21.1|RP11-89	long intergenic non-protein coding RNA 1833	ncRNA
9_siCtrl_WDR5_peak_7737	chr17	73774662	73775907	+	850	NA	intron (NM_005324, intron 1 of 3)	CpG-11127	576	NM_005324	3021	Hs.180877	NM_005324	ENSG00000132475	H3F3B	H3.3B	H3 histone family member 3B	protein-coding
9_siCtrl_WDR5_peak_5806	chr15	67834538	67835508	+	850	NA	promoter-TSS (NM_145160)	promoter-TSS (NM_145160)	-18	NM_145160	5607	Hs.114198	NM_002757	ENSG00000137764	MAP2K5	HsT17454|MAPKK5|MEK5|PRKMK5	mitogen-activated protein kinase kinase 5	protein-coding
9_siCtrl_WDR5_peak_14476	chr6	26596855	26597638	+	850	NA	promoter-TSS (NM_013375)	promoter-TSS (NM_013375)	65	NM_013375	29777	Hs.254406	NM_013375	ENSG00000146109	ABT1	Esf2|hABT1	activator of basal transcription 1	protein-coding
9_siCtrl_WDR5_peak_2132	chr10	64563868	64565097	+	850	NA	promoter-TSS (NM_032804)	promoter-TSS (NM_032804)	2	NM_032804	84890	Hs.99821	NM_032804	ENSG00000181915	ADO	C10orf22	2-aminoethanethiol dioxygenase	protein-coding
9_siCtrl_WDR5_peak_17610	chr9	106855892	106857100	+	849	NA	promoter-TSS (NM_001265602)	promoter-TSS (NM_001265602)	-45	NM_001265602	10592	Hs.119023	NM_006444	ENSG00000136824	SMC2	CAP-E|CAPE|SMC-2|SMC2L1	structural maintenance of chromosomes 2	protein-coding
9_siCtrl_WDR5_peak_2785	chr11	26307246	26307699	+	849	NA	non-coding (NR_132968, exon 3 of 3)	non-coding (NR_132968, exon 3 of 3)	2082	NR_132968	105376599	Hs.125537	NR_132968	ENSG00000254819	ANO3-AS1	-	ANO3 antisense RNA 1	ncRNA
9_siCtrl_WDR5_peak_1760	chr1	238395135	238395838	+	849	NA	Intergenic	Intergenic	253831	NR_015407	339535	Hs.532047	NR_015407	ENSG00000215808	LINC01139	LINK-A|LINKA	long intergenic non-protein coding RNA 1139	ncRNA
9_siCtrl_WDR5_peak_5129	chr14	62416956	62417457	+	849	NA	intron (NM_001367663, intron 1 of 7)	intron (NM_001367663, intron 1 of 7)	22793	NM_001367663	83851	Hs.404139	NM_031914	ENSG00000139973	SYT16	CHR14SYT|SYT14L|Strep14|syt14r	synaptotagmin 16	protein-coding
9_siCtrl_WDR5_peak_1996	chr10	29934989	29935822	+	849	NA	intron (NM_003174, intron 3 of 35)	intron (NM_003174, intron 3 of 35)	-11505	NM_021738	6840	Hs.499209	NM_003174	ENSG00000197321	SVIL	-	supervillin	protein-coding
9_siCtrl_WDR5_peak_16744	chr8	67578966	67580058	+	848	NA	promoter-TSS (NM_025054)	promoter-TSS (NM_025054)	-46	NM_025054	80124	Hs.632066	NM_025054	ENSG00000175073	VCPIP1	DUBA3|VCIP135	valosin containing protein interacting protein 1	protein-coding
9_siCtrl_WDR5_peak_15443	chr7	5462616	5465567	+	848	NA	promoter-TSS (NM_001080495)	promoter-TSS (NM_001080495)	-914	NM_001080495	84629	Hs.520638	NM_001013722	ENSG00000182095	TNRC18	CAGL79|TNRC18A	trinucleotide repeat containing 18	protein-coding
9_siCtrl_WDR5_peak_15237	chr6	149866906	149867654	+	847	NA	promoter-TSS (NM_139126)	promoter-TSS (NM_139126)	-101	NM_139126	85313	Hs.744238	NM_139126	ENSG00000131013	PPIL4	HDCME13P	peptidylprolyl isomerase like 4	protein-coding
9_siCtrl_WDR5_peak_16314	chr7	148936604	148937022	+	847	NA	promoter-TSS (NM_012256)	promoter-TSS (NM_012256)	71	NM_012256	7988	Hs.490510	NM_012256	ENSG00000170260	ZNF212	C2H2-150|ZNF182|ZNFC150	zinc finger protein 212	protein-coding
9_siCtrl_WDR5_peak_10280	chr2	187350430	187351754	+	847	NA	5' UTR (NM_018471, exon 1 of 10)	5' UTR (NM_018471, exon 1 of 10)	105	NM_018471	55854	Hs.741180	NM_018471	ENSG00000065548	ZC3H15	HT010|LEREPO4|MSTP012	zinc finger CCCH-type containing 15	protein-coding
9_siCtrl_WDR5_peak_11933	chr3	52739545	52740580	+	846	NA	promoter-TSS (NM_014041)	promoter-TSS (NM_014041)	37	NM_018446	55830	Hs.297304	NM_018446	ENSG00000016864	GLT8D1	AD-017|MSTP139	glycosyltransferase 8 domain containing 1	protein-coding
9_siCtrl_WDR5_peak_11420	chr22	31742290	31743448	+	846	NA	promoter-TSS (NM_014323)	promoter-TSS (NM_014323)	124	NR_120386	54944	Hs.648259	NM_017834		LINC01521	-	long intergenic non-protein coding RNA 1521	ncRNA
9_siCtrl_WDR5_peak_13995	chr5	145561964	145562506	+	846	NA	promoter-TSS (NM_020117)	promoter-TSS (NM_020117)	-22	NM_020117	51520	Hs.432674	NM_016460	ENSG00000133706	LARS	HSPC192|ILFS1|LARS1|LEURS|LEUS|LFIS|LRS|PIG44|RNTLS|hr025Cl	leucyl-tRNA synthetase	protein-coding
9_siCtrl_WDR5_peak_9110	chr19	57988265	57989357	+	846	NA	5' UTR (NM_001330613, exon 1 of 3)	5' UTR (NM_001330613, exon 1 of 3)	123	NM_001144068	400720	Hs.388810	NM_001024596	ENSG00000197128	ZNF772	-	zinc finger protein 772	protein-coding
9_siCtrl_WDR5_peak_15671	chr7	40173552	40174537	+	846	NA	promoter-TSS (NM_001193313)	promoter-TSS (NM_001193313)	177	NM_138701	136647	Hs.654989	NM_138701	ENSG00000168303	MPLKIP	ABHS|C7orf11|ORF20|TTD4	M-phase specific PLK1 interacting protein	protein-coding
9_siCtrl_WDR5_peak_7317	chr17	43983405	43984062	+	846	NA	intron (NM_016835, intron 1 of 13).2	intron (NM_016835, intron 1 of 13).2	10584	NR_024560	100130148	Hs.669307	NR_024560	ENSG00000279685	MAPT-IT1	-	MAPT intronic transcript 1	ncRNA
9_siCtrl_WDR5_peak_5310	chr14	93383491	93384183	+	845	NA	Intergenic	Intergenic	-5658	NM_001275	1113	Hs.150793	NM_001275	ENSG00000100604	CHGA	CGA	chromogranin A	protein-coding
9_siCtrl_WDR5_peak_15870	chr7	73097305	73098335	+	845	NA	promoter-TSS (NR_045512)	promoter-TSS (NR_045512)	-37	NM_032317	84277	Hs.647046	NM_032317	ENSG00000176410	DNAJC30	WBSCR18	DnaJ heat shock protein family (Hsp40) member C30	protein-coding
9_siCtrl_WDR5_peak_7382	chr17	48171930	48173086	+	845	NA	promoter-TSS (NM_002611)	promoter-TSS (NM_002611)	-131	NM_001199900	5164	Hs.256667	NM_002611	ENSG00000005882	PDK2	PDHK2|PDKII	pyruvate dehydrogenase kinase 2	protein-coding
9_siCtrl_WDR5_peak_7570	chr17	61554111	61555246	+	845	NA	exon (NM_000789, exon 1 of 25)	exon (NM_000789, exon 1 of 25)	256	NM_000789	1636	Hs.298469	NM_000789	ENSG00000159640	ACE	ACE1|CD143|DCP|DCP1	angiotensin I converting enzyme	protein-coding
9_siCtrl_WDR5_peak_5653	chr15	51057347	51058247	+	845	NA	5' UTR (NM_032802, exon 1 of 15)	5' UTR (NM_032802, exon 1 of 15)	106	NM_032802	84888	Hs.401537	NM_032802	ENSG00000138600	SPPL2A	IMP3|PSL2	signal peptide peptidase like 2A	protein-coding
9_siCtrl_WDR5_peak_1627	chr1	226373947	226374959	+	844	NA	promoter-TSS (NM_022735)	promoter-TSS (NM_022735)	-11	NM_022735	64746	Hs.520207	NM_022735	ENSG00000182827	ACBD3	GCP60|GOCAP1|GOLPH1|PAP7	acyl-CoA binding domain containing 3	protein-coding
9_siCtrl_WDR5_peak_8074	chr18	39547682	39548191	+	843	NA	intron (NM_002647, intron 3 of 24)	intron (NM_002647, intron 3 of 24)	12737	NM_001308020	5289	Hs.464971	NM_002647	ENSG00000078142	PIK3C3	VPS34|Vps34|hVps34	phosphatidylinositol 3-kinase catalytic subunit type 3	protein-coding
9_siCtrl_WDR5_peak_10458	chr2	219134410	219135551	+	842	NA	promoter-TSS (NM_001077399)	promoter-TSS (NM_001077399)	-120	NM_001302545	14	Hs.83347	NM_001087	ENSG00000127837	AAMP	-	angio associated migratory cell protein	protein-coding
9_siCtrl_WDR5_peak_4867	chr13	103497803	103498849	+	842	NA	5' UTR (NM_000123, exon 1 of 15)	5' UTR (NM_000123, exon 1 of 15)	135	NM_000123	2073	Hs.258429	NM_000123	ENSG00000134899	ERCC5	COFS3|ERCC5-201|ERCM2|UVDR|XPG|XPGC	ERCC excision repair 5, endonuclease	protein-coding
9_siCtrl_WDR5_peak_16691	chr8	56986467	56987370	+	842	NA	promoter-TSS (NR_002437)	promoter-TSS (NR_002437)	147	NM_001146227	6224	Hs.8102	NM_001023	ENSG00000008988	RPS20	S20|uS10	ribosomal protein S20	protein-coding
9_siCtrl_WDR5_peak_10292	chr2	190626938	190628215	+	842	NA	promoter-TSS (NR_102429)	promoter-TSS (NR_102429)	-58	NM_022353	64172	Hs.60772	NM_022353	ENSG00000128694	OSGEPL1	OSGEPL|Qri7	O-sialoglycoprotein endopeptidase like 1	protein-coding
9_siCtrl_WDR5_peak_16232	chr7	135457012	135458689	+	842	NA	Intergenic	Intergenic	-24289	NM_001369697	389558	Hs.55200	NM_205855	ENSG00000189320	FAM180A	UNQ1940	family with sequence similarity 180 member A	protein-coding
9_siCtrl_WDR5_peak_11906	chr3	50329527	50330166	+	841	NA	TTS (NM_001200031)	TTS (NM_001200031)	180	NM_006764	7866	Hs.315177	NM_006764	ENSG00000214706	IFRD2	IFNRP|SKMc15|SM15	interferon related developmental regulator 2	protein-coding
9_siCtrl_WDR5_peak_7354	chr17	46184669	46185607	+	840	NA	5' UTR (NM_001330320, exon 1 of 7)	5' UTR (NM_001330320, exon 1 of 7)	191	NM_013323	29916	Hs.15827	NM_013323	ENSG00000002919	SNX11	-	sorting nexin 11	protein-coding
9_siCtrl_WDR5_peak_5422	chr14	105956816	105958054	+	839	NA	promoter-TSS (NM_001367178)	promoter-TSS (NM_001367178)	-148	NM_001367178	283643	Hs.720306	NM_173608	ENSG00000185347	TEDC1	C14orf80	tubulin epsilon and delta complex 1	protein-coding
9_siCtrl_WDR5_peak_7729	chr17	73285225	73285944	+	839	NA	promoter-TSS (NM_001126122)	promoter-TSS (NM_001126122)	-54	NM_001126122	60386	Hs.514470	NM_021734	ENSG00000125454	SLC25A19	DNC|MCPHA|MUP1|THMD3|THMD4|TPC	solute carrier family 25 member 19	protein-coding
9_siCtrl_WDR5_peak_15569	chr7	27702069	27702841	+	839	NA	promoter-TSS (NM_152740)	promoter-TSS (NM_152740)	47	NM_152740	11112	Hs.406758	NM_152740	ENSG00000106049	HIBADH	NS5ATP1	3-hydroxyisobutyrate dehydrogenase	protein-coding
9_siCtrl_WDR5_peak_8523	chr19	13227109	13227961	+	838	NA	promoter-TSS (NM_001136035)	promoter-TSS (NM_001136035)	19	NM_001351760	55621	Hs.515169	NM_017722	ENSG00000104907	TRMT1	MRT68|TRM1	tRNA methyltransferase 1	protein-coding
9_siCtrl_WDR5_peak_7845	chr17	79196436	79197524	+	838	NA	promoter-TSS (NM_001319228)	promoter-TSS (NM_001319228)	-215	NM_001009811	22994	Hs.514578	NM_014984	ENSG00000141577	CEP131	AZ1|AZI1|ZA1	centrosomal protein 131	protein-coding
9_siCtrl_WDR5_peak_7874	chr17	79828411	79829937	+	838	NA	promoter-TSS (NM_001301242)	promoter-TSS (NM_001301242)	39	NM_001185078	396	Hs.159161	NM_004309	ENSG00000141522	ARHGDIA	GDIA1|HEL-S-47e|NPHS8|RHOGDI|RHOGDI-1	Rho GDP dissociation inhibitor alpha	protein-coding
9_siCtrl_WDR5_peak_1213	chr1	173683640	173684651	+	838	NA	promoter-TSS (NM_014458)	promoter-TSS (NM_014458)	25	NM_014458	27252	Hs.495035	NM_014458	ENSG00000076321	KLHL20	KHLHX|KLEIP|KLHLX	kelch like family member 20	protein-coding
9_siCtrl_WDR5_peak_7752	chr17	74349731	74350510	+	837	NA	promoter-TSS (NM_002766)	promoter-TSS (NM_002766)	-123	NM_002766	5635	Hs.77498	NM_002766	ENSG00000161542	PRPSAP1	PAP39	phosphoribosyl pyrophosphate synthetase associated protein 1	protein-coding
9_siCtrl_WDR5_peak_5760	chr15	64385388	64386756	+	837	NA	promoter-TSS (NM_032231)	promoter-TSS (NM_032231)	-35	NM_032231	84191	Hs.439548	NM_032231	ENSG00000166797	CIAO2A	CIA2A|FAM96A	cytosolic iron-sulfur assembly component 2A	protein-coding
9_siCtrl_WDR5_peak_17936	chrX	18693123	18693600	+	837	NA	Intergenic	CpG	-3138	NM_000330	6247	Hs.715725	NM_000330	ENSG00000102104	RS1	RS|XLRS1	retinoschisin 1	protein-coding
9_siCtrl_WDR5_peak_4479	chr12	133287036	133288019	+	837	NA	promoter-TSS (NM_001170544)	promoter-TSS (NM_001170544)	99	NM_138575	192111	Hs.102558	NM_138575	ENSG00000247077	PGAM5	BXLBV68	PGAM family member 5, mitochondrial serine/threonine protein phosphatase	protein-coding
9_siCtrl_WDR5_peak_6887	chr17	6915412	6916295	+	837	NA	promoter-TSS (NR_040089)	promoter-TSS (NR_040089)	117	NR_037717	100529209	Hs.511801	NR_037717	ENSG00000161939	RNASEK-C17orf49	BAP18|C17orf49	RNASEK-C17orf49 readthrough	ncRNA
9_siCtrl_WDR5_peak_2801	chr11	28131640	28132269	+	837	NA	intron (NM_001113528, intron 2 of 6)	CpG	2019	NM_152636	196074	Hs.243326	NM_152636	ENSG00000169519	METTL15	METT5D1	methyltransferase like 15	protein-coding
9_siCtrl_WDR5_peak_9752	chr2	74739996	74740820	+	837	NA	Intergenic	Intergenic	-1169	NM_016170	3196	Hs.168586	NM_016170	ENSG00000115297	TLX2	HOX11L1|NCX	T cell leukemia homeobox 2	protein-coding
9_siCtrl_WDR5_peak_9027	chr19	52956563	52957531	+	837	NA	intron (NM_001099694, intron 1 of 5)	CpG	241	NM_001099694	147660	Hs.157287	NM_152472	ENSG00000258405	ZNF578	-	zinc finger protein 578	protein-coding
9_siCtrl_WDR5_peak_5945	chr15	77712791	77713721	+	836	NA	promoter-TSS (NM_001304504)	promoter-TSS (NM_001304504)	26	NM_001304504	10363	Hs.69594	NM_018200	ENSG00000140382	HMG20A	HMGX1|HMGXB1	high mobility group 20A	protein-coding
9_siCtrl_WDR5_peak_11137	chr21	27652956	27653642	+	836	NA	Intergenic	Intergenic	-109853	NM_001136131	351	Hs.434980	NM_000484	ENSG00000142192	APP	AAA|ABETA|ABPP|AD1|APPI|CTFgamma|CVAP|PN-II|PN2|preA4	amyloid beta precursor protein	protein-coding
9_siCtrl_WDR5_peak_17706	chr9	125702980	125703636	+	836	NA	promoter-TSS (NM_012197)	promoter-TSS (NM_012197)	9	NM_012197	23637	Hs.271341	NM_012197	ENSG00000011454	RABGAP1	GAPCENA|TBC1D11	RAB GTPase activating protein 1	protein-coding
9_siCtrl_WDR5_peak_1321	chr1	193073865	193075033	+	836	NA	exon (NM_197962, exon 1 of 4)	exon (NM_197962, exon 1 of 4)	159	NM_197962	51022	Hs.458283	NM_016066	ENSG00000023572	GLRX2	CGI-133|GRX2	glutaredoxin 2	protein-coding
9_siCtrl_WDR5_peak_5575	chr15	43212140	43213671	+	835	NA	promoter-TSS (NM_173500)	promoter-TSS (NM_173500)	71	NM_173500	146057	Hs.646511	NM_173500	ENSG00000128881	TTBK2	SCA11|TTBK	tau tubulin kinase 2	protein-coding
9_siCtrl_WDR5_peak_12639	chr4	2470241	2471666	+	835	NA	promoter-TSS (NM_001185009)	promoter-TSS (NM_001185009)	120	NM_001185010	6047	Hs.66394	NM_002938	ENSG00000063978	RNF4	RES4-26|SLX5|SNURF	ring finger protein 4	protein-coding
9_siCtrl_WDR5_peak_13708	chr5	91181311	91181784	+	835	NA	Intergenic	Intergenic	-502413	NM_020801	57561	Hs.24684	NM_020801	ENSG00000113369	ARRDC3	TLIMP	arrestin domain containing 3	protein-coding
9_siCtrl_WDR5_peak_10863	chr20	36661111	36662627	+	835	NA	promoter-TSS (NM_014657)	promoter-TSS (NM_014657)	-11	NM_014657	9675	Hs.655481	NM_014657	ENSG00000101407	TTI1	KIAA0406|smg-10	TELO2 interacting protein 1	protein-coding
9_siCtrl_WDR5_peak_16175	chr7	128864241	128865145	+	835	NA	promoter-TSS (NM_015328)	promoter-TSS (NM_015328)	-178	NM_015328	23382	Hs.600789	NM_015328	ENSG00000158467	AHCYL2	ADOHCYASE3|IRBIT2	adenosylhomocysteinase like 2	protein-coding
9_siCtrl_WDR5_peak_17612	chr9	107644418	107645299	+	834	NA	intron (NM_005502, intron 5 of 49)	intron (NM_005502, intron 5 of 49)	45578	NM_005502	19	Hs.659274	NM_005502	ENSG00000165029	ABCA1	ABC-1|ABC1|CERP|HDLDT1|TGD	ATP binding cassette subfamily A member 1	protein-coding
9_siCtrl_WDR5_peak_12563	chr3	194853743	194854165	+	834	NA	intron (NM_152531, intron 3 of 3)	intron (NM_152531, intron 3 of 3)	1355	NR_036089	100422926		NR_036089	ENSG00000265333	MIR3137	-	microRNA 3137	ncRNA
9_siCtrl_WDR5_peak_67	chr1	8086082	8086958	+	834	NA	promoter-TSS (NM_018948)	promoter-TSS (NM_018948)	-151	NM_018948	54206	Hs.605445	NM_018948	ENSG00000116285	ERRFI1	GENE-33|MIG-6|MIG6|RALT	ERBB receptor feedback inhibitor 1	protein-coding
9_siCtrl_WDR5_peak_7862	chr17	79481467	79482477	+	833	NA	Intergenic	CpG-11343	-2147	NM_001614	71	Hs.514581	NM_001614	ENSG00000184009	ACTG1	ACT|ACTG|DFNA20|DFNA26|HEL-176	actin gamma 1	protein-coding
9_siCtrl_WDR5_peak_1291	chr1	184020427	184021296	+	832	NA	promoter-TSS (NM_052965)	promoter-TSS (NM_052965)	-3	NM_001127394	116461	Hs.548197	NM_052965	ENSG00000198860	TSEN15	C1orf19|PCH2F|sen15	tRNA splicing endonuclease subunit 15	protein-coding
9_siCtrl_WDR5_peak_17668	chr9	116172303	116173378	+	832	NA	promoter-TSS (NM_001278629)	promoter-TSS (NM_001278629)	115	NM_017443	54107	Hs.108112	NM_017443	ENSG00000148229	POLE3	CHARAC17|CHRAC17|CHRAC2|YBL1|p17	DNA polymerase epsilon 3, accessory subunit	protein-coding
9_siCtrl_WDR5_peak_12164	chr3	115770450	115770893	+	830	NA	intron (NM_002338, intron 2 of 6)	intron (NM_002338, intron 2 of 6)	-146698	NR_145779	109623450		NR_145779		SNORD155	-	small nucleolar RNA, C/D box 155	snoRNA
9_siCtrl_WDR5_peak_7888	chr17	80170312	80171324	+	829	NA	promoter-TSS (NM_198082)	promoter-TSS (NM_198082)	-100	NM_001367828	284001	Hs.631724	NM_152675	ENSG00000176155	CCDC57	-	coiled-coil domain containing 57	protein-coding
9_siCtrl_WDR5_peak_565	chr1	70670785	70671739	+	829	NA	promoter-TSS (NM_001350608)	promoter-TSS (NM_001350608)	0	NM_017768	55631	Hs.147836	NM_017768	ENSG00000066557	LRRC40	dJ677H15.1	leucine rich repeat containing 40	protein-coding
9_siCtrl_WDR5_peak_10789	chr20	30467566	30468399	+	827	NA	intron (NR_160277, intron 1 of 12)	intron (NR_160277, intron 1 of 12)	362	NM_001367620	164395	Hs.712915	NM_001008409	ENSG00000131044	TTLL9	C20orf125	tubulin tyrosine ligase like 9	protein-coding
9_siCtrl_WDR5_peak_4950	chr14	23564634	23565335	+	827	NA	promoter-TSS (NM_014977)	promoter-TSS (NM_014977)	-161	NM_014977	22985	Hs.124490	NM_014977	ENSG00000100813	ACIN1	ACINUS|ACN|fSAP152	apoptotic chromatin condensation inducer 1	protein-coding
9_siCtrl_WDR5_peak_7594	chr17	62915091	62916126	+	827	NA	promoter-TSS (NM_001303255)	promoter-TSS (NM_001303255)	1	NM_199340	374819	Hs.551962	NM_199340	ENSG00000176809	LRRC37A3	LRRC37|LRRC37A	leucine rich repeat containing 37 member A3	protein-coding
9_siCtrl_WDR5_peak_8342	chr19	3500373	3500917	+	827	NA	promoter-TSS (NM_001145165)	promoter-TSS (NM_001145165)	27	NM_031304	83475	Hs.515064	NM_031304	ENSG00000129932	DOHH	HLRC1|hDOHH	deoxyhypusine hydroxylase	protein-coding
9_siCtrl_WDR5_peak_2066	chr10	45496060	45496867	+	827	NA	promoter-TSS (NR_126421)	promoter-TSS (NR_126421)	92	NM_006963	7570	Hs.462693	NM_006963	ENSG00000165512	ZNF22	HKR-T1|KOX15|ZNF422|Zfp422	zinc finger protein 22	protein-coding
9_siCtrl_WDR5_peak_15971	chr7	93633125	93633884	+	827	NA	intron (NR_133908, intron 1 of 6)	CpG	163	NR_133909	10282	Hs.489132	NM_005868	ENSG00000105829	BET1	HBET1	Bet1 golgi vesicular membrane trafficking protein	protein-coding
9_siCtrl_WDR5_peak_4509	chr13	21347359	21348137	+	827	NA	intron (NM_001318939, intron 1 of 4)	CpG	349	NM_174928	221143	Hs.26674	NM_174928	ENSG00000150456	EEF1AKMT1	ESP13|N6AMT2	EEF1A lysine methyltransferase 1	protein-coding
9_siCtrl_WDR5_peak_14179	chr5	173941798	173942405	+	827	NA	intron (NR_125806, intron 2 of 5)	intron (NR_125806, intron 2 of 5)	178744	NR_125806	101928176	Hs.436014	NR_125806	ENSG00000249306	LINC01411	-	long intergenic non-protein coding RNA 1411	ncRNA
9_siCtrl_WDR5_peak_14913	chr6	91605543	91606253	+	827	NA	Intergenic	Intergenic	-309107	NM_145332	6885	Hs.594838	NM_003188	ENSG00000135341	MAP3K7	CSCF|FMD2|MEKK7|TAK1|TGF1a	mitogen-activated protein kinase kinase kinase 7	protein-coding
9_siCtrl_WDR5_peak_16417	chr8	9413021	9413978	+	826	NA	promoter-TSS (NM_003747)	promoter-TSS (NM_003747)	77	NM_003747	8658	Hs.370267	NM_003747	ENSG00000173273	TNKS	ARTD5|PARP-5a|PARP5A|PARPL|TIN1|TINF1|TNKS1|pART5	tankyrase	protein-coding
9_siCtrl_WDR5_peak_10810	chr20	31988825	31989579	+	826	NA	intron (NM_016408, intron 1 of 13)	CpG	123	NM_016408	51654	Hs.435952	NM_016082	ENSG00000101391	CDK5RAP1	C20orf34|C42|CGI-05|HSPC167	CDK5 regulatory subunit associated protein 1	protein-coding
9_siCtrl_WDR5_peak_13694	chr5	82372910	82373919	+	826	NA	promoter-TSS (NM_003401)	promoter-TSS (NM_003401)	48	NM_003401	7518	Hs.567359	NM_003401	ENSG00000152422	XRCC4	SSMED	X-ray repair cross complementing 4	protein-coding
9_siCtrl_WDR5_peak_9115	chr19	58089946	58090568	+	826	NA	promoter-TSS (NM_001353405)	promoter-TSS (NM_001353405)	22	NM_017879	55659	Hs.247711	NM_017879	ENSG00000083817	ZNF416	-	zinc finger protein 416	protein-coding
9_siCtrl_WDR5_peak_6528	chr16	31128745	31129270	+	826	NA	promoter-TSS (NM_182958)	promoter-TSS (NM_182958)	22	NM_182958	84148	Hs.533803	NM_032188	ENSG00000103510	KAT8	MOF|MYST1|ZC2HC8|hMOF	lysine acetyltransferase 8	protein-coding
9_siCtrl_WDR5_peak_995	chr1	153939570	153940621	+	826	NA	promoter-TSS (NR_045658)	promoter-TSS (NR_045658)	106	NM_014437	27173	Hs.7854	NM_014437	ENSG00000143570	SLC39A1	ZIP1|ZIRTL	solute carrier family 39 member 1	protein-coding
9_siCtrl_WDR5_peak_16816	chr8	82754747	82755106	+	826	NA	promoter-TSS (NR_145472)	promoter-TSS (NR_145472)	-405	NM_022133	64089	Hs.492121	NM_022133	ENSG00000104497	SNX16	-	sorting nexin 16	protein-coding
9_siCtrl_WDR5_peak_6641	chr16	58718146	58718861	+	826	NA	promoter-TSS (NM_001308384)	promoter-TSS (NM_001308384)	171	NM_001369610	55238	Hs.10499	NM_018231	ENSG00000103042	SLC38A7	SNAT7	solute carrier family 38 member 7	protein-coding
9_siCtrl_WDR5_peak_14897	chr6	90710529	90711401	+	826	NA	intron (NM_021813, intron 6 of 8)	intron (NM_021813, intron 6 of 8)	106777	NM_032602	84694	Hs.334499	NM_032602	ENSG00000135355	GJA10	CX62	gap junction protein alpha 10	protein-coding
9_siCtrl_WDR5_peak_10199	chr2	174828214	174830842	+	825	NA	promoter-TSS (NM_001017371)	promoter-TSS (NM_001017371)	902	NM_001172712	6670	Hs.531587	NM_003111	ENSG00000172845	SP3	SPR2	Sp3 transcription factor	protein-coding
9_siCtrl_WDR5_peak_6105	chr15	93177462	93178396	+	825	NA	intron (NM_207446, intron 1 of 2)	MLT2B4|LTR|ERVL	21076	NM_207446	400451	Hs.27373	NM_207446	ENSG00000185442	FAM174B	-	family with sequence similarity 174 member B	protein-coding
9_siCtrl_WDR5_peak_6595	chr16	53536666	53537977	+	825	NA	promoter-TSS (NM_022476)	promoter-TSS (NM_022476)	-105	NM_001308325	64400	Hs.380897	NM_022476	ENSG00000166971	AKTIP	FT1|FTS	AKT interacting protein	protein-coding
9_siCtrl_WDR5_peak_1331	chr1	197643354	197643780	+	824	NA	intron (NM_144977, intron 3 of 15)	intron (NM_144977, intron 3 of 15)	101043	NM_001300858	163486	Hs.125056	NM_019049	ENSG00000213047	DENND1B	C1ORF18|C1orf218|FAM31B	DENN domain containing 1B	protein-coding
9_siCtrl_WDR5_peak_13598	chr5	70220482	70221308	+	823	NA	5' UTR (NM_022874, exon 1 of 8).2	5' UTR (NM_022874, exon 1 of 8).2	127	NM_022876	6607	Hs.202179	NM_017411	ENSG00000205571	SMN2	BCD541|C-BCD541|GEMIN1|SMNC|TDRD16B	survival of motor neuron 2, centromeric	protein-coding
9_siCtrl_WDR5_peak_16618	chr8	37962329	37963313	+	822	NA	promoter-TSS (NM_001261832)	promoter-TSS (NM_001261832)	-190	NM_001282272	9070	Hs.521530	NM_004674	ENSG00000129691	ASH2L	ASH2|ASH2L1|ASH2L2|Bre2	ASH2 like, histone lysine methyltransferase complex subunit	protein-coding
9_siCtrl_WDR5_peak_9776	chr2	76894883	76895329	+	821	NA	Intergenic	Intergenic	-317985	NR_110284	101927907	Hs.382185	NR_110284	ENSG00000234653	LOC101927907	-	uncharacterized LOC101927907	ncRNA
9_siCtrl_WDR5_peak_18161	chrX	124570371	124570958	+	821	NA	Intergenic	HUERS-P3-int|LTR|ERV1	116944	NM_001195272	100129520		NM_001195272	ENSG00000282815	TEX13C	-	TEX13 family member C	protein-coding
9_siCtrl_WDR5_peak_4741	chr13	59193480	59193921	+	821	NA	Intergenic	Intergenic	-386449	NR_132367	106144531	Hs.736640	NR_132367	ENSG00000232954	LINC00374	-	long intergenic non-protein coding RNA 374	ncRNA
9_siCtrl_WDR5_peak_11713	chr3	18411085	18411622	+	821	NA	intron (NM_001131010, intron 9 of 10)	intron (NM_001131010, intron 9 of 10)	55478	NM_002971	6304	Hs.517717	NM_002971	ENSG00000182568	SATB1	-	SATB homeobox 1	protein-coding
9_siCtrl_WDR5_peak_16752	chr8	71094220	71094572	+	821	NA	intron (NM_001321703, intron 4 of 22)	intron (NM_001321703, intron 4 of 22)	-110909	NM_024504	63978	Hs.736037	NM_024504	ENSG00000147596	PRDM14	PFM11	PR/SET domain 14	protein-coding
9_siCtrl_WDR5_peak_15319	chr6	160147540	160149208	+	820	NA	promoter-TSS (NM_001270531)	promoter-TSS (NM_001270531)	13	NM_001322819	6648	Hs.487046	NM_000636	ENSG00000112096	SOD2	IPO-B|IPOB|MNSOD|MVCD6|Mn-SOD	superoxide dismutase 2	protein-coding
9_siCtrl_WDR5_peak_4169	chr12	104359157	104360338	+	818	NA	promoter-TSS (NM_003211)	promoter-TSS (NM_003211)	97	NM_003211	6996	Hs.584809	NM_003211	ENSG00000139372	TDG	hTDG	thymine DNA glycosylase	protein-coding
9_siCtrl_WDR5_peak_1610	chr1	224517540	224518470	+	818	NA	promoter-TSS (NM_002533)	promoter-TSS (NM_002533)	-114	NM_001243147	4931	Hs.497867	NM_002533	ENSG00000143748	NVL	NVL2	nuclear VCP like	protein-coding
9_siCtrl_WDR5_peak_1060	chr1	156182573	156183240	+	818	NA	TTS (NM_001286184)	TTS (NM_001286184)	127	NM_001199664	100527963	Hs.530479	NM_001199661	ENSG00000260238	PMF1-BGLAP	PMF-1|PMF1	PMF1-BGLAP readthrough	protein-coding
9_siCtrl_WDR5_peak_16017	chr7	99775239	99775698	+	818	NA	promoter-TSS (NM_152742)	promoter-TSS (NM_152742)	-73	NM_012447	10734	Hs.592283	NM_012447	ENSG00000066923	STAG3	-	stromal antigen 3	protein-coding
9_siCtrl_WDR5_peak_15086	chr6	119091387	119091884	+	818	NA	Intergenic	Intergenic	-12236	NR_037662	100287632	Hs.334026	NR_037662		SELENOKP3	-	selenoprotein K pseudogene 3	pseudo
9_siCtrl_WDR5_peak_14555	chr6	31126060	31126933	+	818	NA	promoter-TSS (NM_019052).2	promoter-TSS (NM_019052).2	130	NM_007109	6941	Hs.584807	NM_007109	ENSG00000137310	TCF19	SC1|TCF-19	transcription factor 19	protein-coding
9_siCtrl_WDR5_peak_12577	chr3	196014175	196015189	+	817	NA	promoter-TSS (NM_001312673)	promoter-TSS (NM_001312673)	-85	NM_001312673	5130	Hs.135997	NM_005017	ENSG00000161217	PCYT1A	CCTA|CT|CTA|CTPCT|PCYT1|SMDCRD	phosphate cytidylyltransferase 1, choline, alpha	protein-coding
9_siCtrl_WDR5_peak_14579	chr6	31939502	31940560	+	817	NA	promoter-TSS (NM_005510).4	promoter-TSS (NM_005510).4	-116	NM_005510	1797	Hs.153299	NM_005510	ENSG00000204348	DXO	DOM3L|DOM3Z|NG6|RAI1	decapping exoribonuclease	protein-coding
9_siCtrl_WDR5_peak_3348	chr11	117198186	117199409	+	817	NA	intron (NM_014956, intron 1 of 32)	CpG	227	NM_014956	22897	Hs.504009	NM_014956	ENSG00000110274	CEP164	NPHP15	centrosomal protein 164	protein-coding
9_siCtrl_WDR5_peak_2276	chr10	88963293	88963938	+	817	NA	Intergenic	Intergenic	-21590	NM_001099338	728118	Hs.710565	NM_001099338	ENSG00000184923	NUTM2A	FAM22A	NUT family member 2A	protein-coding
9_siCtrl_WDR5_peak_13772	chr5	110722003	110722702	+	817	NA	intron (NM_001323374, intron 5 of 11)	intron (NM_001323374, intron 5 of 11)	-125572	NR_040093	100505678	Hs.745061	NR_040093	ENSG00000246859	STARD4-AS1	-	STARD4 antisense RNA 1	ncRNA
9_siCtrl_WDR5_peak_14564	chr6	31632485	31634172	+	816	NA	promoter-TSS (NM_001320)	promoter-TSS (NM_001320)	79	NM_001199240	7918	Hs.247478	NM_033177	ENSG00000204438	GPANK1	ANKRD59|BAT4|D6S54E|G5|GPATCH10	G-patch domain and ankyrin repeats 1	protein-coding
9_siCtrl_WDR5_peak_17886	chr9	140134885	140136079	+	816	NA	promoter-TSS (NM_006088)	promoter-TSS (NM_006088)	-257	NM_006088	10383	Hs.433615	NM_006088	ENSG00000188229	TUBB4B	Beta2|LCAEOD|TUBB2|TUBB2C	tubulin beta 4B class IVb	protein-coding
9_siCtrl_WDR5_peak_5838	chr15	70325934	70326419	+	816	NA	Intergenic	CpG	45631	NR_030714	693214		NR_030714	ENSG00000207965	MIR629	MIRN629|hsa-mir-629|mir-629	microRNA 629	ncRNA
9_siCtrl_WDR5_peak_5386	chr14	103058174	103059263	+	816	NA	promoter-TSS (NM_015156)	promoter-TSS (NM_015156)	-268	NM_015156	23186	Hs.510521	NM_015156	ENSG00000089902	RCOR1	COREST|RCOR	REST corepressor 1	protein-coding
9_siCtrl_WDR5_peak_11808	chr3	39447875	39448907	+	815	NA	intron (NM_002295, intron 1 of 6)	CpG	180	NM_002295	3921	Hs.449909	NM_002295	ENSG00000168028	RPSA	37LRP|67LR|ICAS|LAMBR|LAMR1|LBP|LBP/p40|LRP|LRP/LR|NEM/1CHD4|SA|lamR|p40	ribosomal protein SA	protein-coding
9_siCtrl_WDR5_peak_14508	chr6	28219665	28220308	+	815	NA	promoter-TSS (NM_019110)	promoter-TSS (NM_019110)	61	NM_019110	387032	Hs.44720	NM_019110	ENSG00000187626	ZKSCAN4	P1P373C6|ZNF307|ZNF427|ZSCAN36	zinc finger with KRAB and SCAN domains 4	protein-coding
9_siCtrl_WDR5_peak_6500	chr16	30545712	30547576	+	815	NA	promoter-TSS (NM_001305019)	promoter-TSS (NM_001305019)	-353	NM_001305018	65988	Hs.592032	NM_023931	ENSG00000169955	ZNF747	-	zinc finger protein 747	protein-coding
9_siCtrl_WDR5_peak_15658	chr7	38948305	38948983	+	815	NA	intron (NM_014396, intron 1 of 28)	intron (NM_014396, intron 1 of 28)	147	NM_014396	27072	Hs.592184	NM_014396	ENSG00000006715	VPS41	HVPS41|HVSP41|hVps41p	VPS41 subunit of HOPS complex	protein-coding
9_siCtrl_WDR5_peak_4108	chr12	95466498	95467551	+	815	NA	intron (NM_001032287, intron 1 of 11)	CpG	370	NM_001032287	7181	Hs.108301	NM_003297	ENSG00000120798	NR2C1	TR2	nuclear receptor subfamily 2 group C member 1	protein-coding
9_siCtrl_WDR5_peak_3507	chr12	4757860	4758699	+	814	NA	promoter-TSS (NM_005002)	promoter-TSS (NM_005002)	-1	NM_005002	4704	Hs.75227	NM_005002	ENSG00000139180	NDUFA9	CC6|CI-39k|CI39k|COQ11|MC1DN26|NDUFS2L|SDR22E1	NADH:ubiquinone oxidoreductase subunit A9	protein-coding
9_siCtrl_WDR5_peak_17298	chr9	34988952	34990057	+	813	NA	promoter-TSS (NM_001135004)	promoter-TSS (NM_001135004)	-128	NR_109756	101926900	Hs.545814	NR_109756	ENSG00000281491	DNAJB5-DT	DNAJB5-AS1	DNAJB5 divergent transcript	ncRNA
9_siCtrl_WDR5_peak_5693	chr15	57179034	57180250	+	812	NA	non-coding (NR_015419, exon 4 of 4)	non-coding (NR_015419, exon 4 of 4)	-30646	NM_001322151	6938	Hs.511504	NM_003205	ENSG00000140262	TCF12	CRS3|HEB|HTF4|HsT17266|TCF-12|bHLHb20|p64	transcription factor 12	protein-coding
9_siCtrl_WDR5_peak_8738	chr19	36605391	36606854	+	812	NA	promoter-TSS (NM_001281)	promoter-TSS (NM_001281)	234	NR_155756	1155	Hs.31053	NM_001281	ENSG00000105254	TBCB	CG22|CKAP1|CKAPI	tubulin folding cofactor B	protein-coding
9_siCtrl_WDR5_peak_4383	chr12	123010807	123012420	+	811	NA	promoter-TSS (NM_023012)	promoter-TSS (NM_023012)	-130	NR_036434	65117	Hs.432996	NM_023012	ENSG00000111011	RSRC2	-	arginine and serine rich coiled-coil 2	protein-coding
9_siCtrl_WDR5_peak_12403	chr3	159557507	159558342	+	811	NA	5' UTR (NM_001197109, exon 1 of 7)	5' UTR (NM_001197109, exon 1 of 7)	274	NM_001197109	29970	Hs.134665	NM_014575	ENSG00000151967	SCHIP1	SCHIP-1	schwannomin interacting protein 1	protein-coding
9_siCtrl_WDR5_peak_11669	chr3	10325228	10325683	+	811	NA	promoter-TSS (NR_026829)	promoter-TSS (NR_026829)	-648	NR_026829	84657	Hs.302131	NM_001039102	ENSG00000231177	LINC00852	C3orf42|GHRL-AS2|GHRLOS2|NAG73	long intergenic non-protein coding RNA 852	ncRNA
9_siCtrl_WDR5_peak_2196	chr10	75489789	75490625	+	810	NA	promoter-TSS (NR_026592)	promoter-TSS (NR_026592)	57	NR_160425	113939925		NR_160425		BMS1P4-AGAP5	-	BMS1P4-AGAP5 readthough	pseudo
9_siCtrl_WDR5_peak_2782	chr11	22646692	22647793	+	810	NA	exon (NM_022725, exon 1 of 1)	exon (NM_022725, exon 1 of 1)	145	NM_022725	2188	Hs.632151	NM_022725	ENSG00000183161	FANCF	FAF	FA complementation group F	protein-coding
9_siCtrl_WDR5_peak_10041	chr2	134878632	134879470	+	810	NA	intron (NM_001371457, intron 1 of 16)	CpG	1545	NM_001371457
9_siCtrl_WDR5_peak_14874	chr6	88182314	88182996	+	810	NA	promoter-TSS (NM_001168398)	promoter-TSS (NM_001168398)	12	NM_001168398	10559	Hs.423163	NM_006416	ENSG00000164414	SLC35A1	CDG2F|CMPST|CST|hCST	solute carrier family 35 member A1	protein-coding
9_siCtrl_WDR5_peak_1499	chr1	212458086	212458785	+	810	NA	promoter-TSS (NM_006243)	promoter-TSS (NM_006243)	-72	NR_125984	101929541	Hs.632493	NR_125982	ENSG00000226251	LINC02608	-	long intergenic non-protein coding RNA 2608	ncRNA
9_siCtrl_WDR5_peak_12076	chr3	88198330	88199464	+	809	NA	promoter-TSS (NM_173824)	promoter-TSS (NM_173824)	119	NM_001195308	8545	Hs.444818	NM_003663	ENSG00000163320	CGGBP1	CGGBP|p20-CGGBP	CGG triplet repeat binding protein 1	protein-coding
9_siCtrl_WDR5_peak_5829	chr15	69744367	69745881	+	808	NA	promoter-TSS (NM_213725)	promoter-TSS (NM_213725)	-33	NM_213725	6176	Hs.356502	NM_001003	ENSG00000137818	RPLP1	LP1|P1|RPP1	ribosomal protein lateral stalk subunit P1	protein-coding
9_siCtrl_WDR5_peak_3178	chr11	76541666	76542545	+	808	NA	Intergenic	Intergenic	-29857	NM_001300953	55331	Hs.23862	NM_018367	ENSG00000078124	ACER3	APHC|PHCA|PLDECO	alkaline ceramidase 3	protein-coding
9_siCtrl_WDR5_peak_4276	chr12	112856305	112857319	+	808	NA	promoter-TSS (NM_080601)	promoter-TSS (NM_080601)	61	NM_080601	5781	Hs.506852	NM_002834	ENSG00000179295	PTPN11	BPTP3|CFC|JMML|METCDS|NS1|PTP-1D|PTP2C|SH-PTP2|SH-PTP3|SHP2	protein tyrosine phosphatase non-receptor type 11	protein-coding
9_siCtrl_WDR5_peak_8014	chr18	22747972	22748520	+	807	NA	intron (NM_001308225, intron 4 of 6)	intron (NM_001308225, intron 4 of 6)	-180303	NR_146903	105372030		NR_146903		LINC01894	-	long intergenic non-protein coding RNA 1894	ncRNA
9_siCtrl_WDR5_peak_16230	chr7	135401390	135401971	+	807	NA	intron (NM_001318192, intron 2 of 15)	L3|LINE|CR1	11254	NM_012450	26266	Hs.490241	NM_012450	ENSG00000164707	SLC13A4	NAS2|SUT-1|SUT1	solute carrier family 13 member 4	protein-coding
9_siCtrl_WDR5_peak_12083	chr3	96951465	96952096	+	807	NA	intron (NM_001080448, intron 4 of 17)	MER50|LTR|ERV1	-206671	NM_173655	285220	Hs.272208	NM_173655	ENSG00000080224	EPHA6	EHK-2|EHK2|EK12|EPA6|HEK12|PRO57066	EPH receptor A6	protein-coding
9_siCtrl_WDR5_peak_4116	chr12	96252595	96253515	+	806	NA	promoter-TSS (NR_135014)	promoter-TSS (NR_135014)	325	NM_003095	6636	Hs.105465	NM_003095	ENSG00000139343	SNRPF	SMF|Sm-F|snRNP-F	small nuclear ribonucleoprotein polypeptide F	protein-coding
9_siCtrl_WDR5_peak_12000	chr3	64013381	64013814	+	806	NA	Intergenic	Intergenic	-3911	NM_001271780	9861	Hs.152536	NM_014814	ENSG00000163636	PSMD6	Rpn7|S10|SGA-113M|p42A|p44S10	proteasome 26S subunit, non-ATPase 6	protein-coding
9_siCtrl_WDR5_peak_1832	chr1	249152380	249153567	+	806	NA	5' UTR (NM_001136036, exon 1 of 12)	5' UTR (NM_001136036, exon 1 of 12)	311	NM_001193328	55657	Hs.377705	NM_017865	ENSG00000171163	ZNF692	AREBP|Zfp692	zinc finger protein 692	protein-coding
9_siCtrl_WDR5_peak_3575	chr12	12966123	12966756	+	805	NA	intron (NM_016355, intron 1 of 11)	intron (NM_016355, intron 1 of 11)	159	NM_201224	51202	Hs.719938	NM_016355	ENSG00000213782	DDX47	E4-DBP|HQ0256|MSTP162|RRP3	DEAD-box helicase 47	protein-coding
9_siCtrl_WDR5_peak_10525	chr2	232328255	232330630	+	805	NA	promoter-TSS (NM_005381)	promoter-TSS (NM_005381)	-247	NM_005381	4691	Hs.79110	NM_005381	ENSG00000115053	NCL	C23|Nsr1	nucleolin	protein-coding
9_siCtrl_WDR5_peak_10242	chr2	178483160	178483988	+	805	NA	promoter-TSS (NM_152275)	promoter-TSS (NM_152275)	-104	NM_152275	92104	Hs.128384	NM_152275	ENSG00000197557	TTC30A	IFT70A|TTC30B	tetratricopeptide repeat domain 30A	protein-coding
9_siCtrl_WDR5_peak_11183	chr21	35013417	35015783	+	805	NA	promoter-TSS (NM_001331011)	promoter-TSS (NM_001331011)	-207	NM_001331009	6453	Hs.90221	NM_003024	ENSG00000205726	ITSN1	ITSN|SH3D1A|SH3P17	intersectin 1	protein-coding
9_siCtrl_WDR5_peak_15879	chr7	74267225	74268140	+	804	NA	5' UTR (NM_001281447, exon 1 of 3)	5' UTR (NM_001281447, exon 1 of 3)	190	NM_173537	84163	Hs.647017	NM_173537	ENSG00000196275	GTF2IRD2	FP630|GTF2IRD2 alpha|GTF2IRD2A	GTF2I repeat domain containing 2	protein-coding
9_siCtrl_WDR5_peak_10713	chr20	18118174	18119204	+	803	NA	exon (NM_001164811, exon 1 of 2)	exon (NM_001164811, exon 1 of 2)	182	NM_001164811	100303755	Hs.488051	NM_001164811	ENSG00000232838	PET117	CSRP2BP	PET117 cytochrome c oxidase chaperone	protein-coding
9_siCtrl_WDR5_peak_12354	chr3	149687906	149689666	+	803	NA	promoter-TSS (NR_036538)	promoter-TSS (NR_036538)	-104	NM_002628	5217	Hs.91747	NM_002628	ENSG00000070087	PFN2	D3S1319E|PFL	profilin 2	protein-coding
9_siCtrl_WDR5_peak_11914	chr3	51422014	51423120	+	803	NA	promoter-TSS (NM_006010)	promoter-TSS (NM_006010)	-155	NM_006010	7873	Hs.436446	NM_006010	ENSG00000145050	MANF	ARMET|ARP	mesencephalic astrocyte derived neurotrophic factor	protein-coding
9_siCtrl_WDR5_peak_2762	chr11	19373850	19375099	+	802	NA	intron (NM_001111018, intron 1 of 37)	intron (NM_001111018, intron 1 of 37)	2203	NM_001111018	89797	Hs.64341	NM_145117	ENSG00000166833	NAV2	HELAD1|POMFIL2|RAINB1|STEERIN2|UNC53H2	neuron navigator 2	protein-coding
9_siCtrl_WDR5_peak_16979	chr8	120119681	120120104	+	802	NA	3' UTR (NM_001324095, exon 8 of 8)	3' UTR (NM_001324095, exon 8 of 8)	-38871	NR_134297	101927513	Hs.676598	NR_134297	ENSG00000254278	LOC101927513	-	uncharacterized LOC101927513	ncRNA
9_siCtrl_WDR5_peak_3926	chr12	58087644	58088294	+	801	NA	promoter-TSS (NM_006812)	promoter-TSS (NM_006812)	54	NM_006812	10956	Hs.527861	NM_006812	ENSG00000135506	OS9	ERLEC2|OS-9	OS9 endoplasmic reticulum lectin	protein-coding
9_siCtrl_WDR5_peak_17272	chr9	32551824	32552900	+	800	NA	TTS (NM_002493)	TTS (NM_002493)	130	NR_146061	100129250	Hs.664395	NM_001349118	ENSG00000235453	SMIM27	C9orf133|TOPORS-AS1	small integral membrane protein 27	protein-coding
9_siCtrl_WDR5_peak_2313	chr10	95461973	95463110	+	800	NA	promoter-TSS (NM_001347712)	promoter-TSS (NM_001347712)	175	NM_001347714	118924	Hs.586650	NM_145246	ENSG00000148690	FRA10AC1	C10orf4|F26C11.1-like|FRA10A	FRA10A associated CGG repeat 1	protein-coding
9_siCtrl_WDR5_peak_6654	chr16	66586123	66586979	+	800	NA	promoter-TSS (NM_181640)	promoter-TSS (NM_181640)	72	NM_001204098	100529251	Hs.698621	NM_001202509	ENSG00000254788	CKLF-CMTM1	-	CKLF-CMTM1 readthrough	protein-coding
9_siCtrl_WDR5_peak_5174	chr14	71066862	71067831	+	800	NA	promoter-TSS (NM_005466)	promoter-TSS (NM_005466)	61	NM_005466	10001	Hs.497353	NM_005466	ENSG00000133997	MED6	ARC33|NY-REN-28	mediator complex subunit 6	protein-coding
9_siCtrl_WDR5_peak_11648	chr3	9004712	9005590	+	799	NA	promoter-TSS (NM_020165)	promoter-TSS (NM_020165)	5	NM_020165	56852	Hs.375684	NM_020165	ENSG00000070950	RAD18	RNF73	RAD18 E3 ubiquitin protein ligase	protein-coding
9_siCtrl_WDR5_peak_15965	chr7	92397934	92398496	+	799	NA	intron (NM_001145306, intron 3 of 7)	intron (NM_001145306, intron 3 of 7)	65058	NM_001259	1021	Hs.119882	NM_001259	ENSG00000105810	CDK6	MCPH12|PLSTIRE	cyclin dependent kinase 6	protein-coding
9_siCtrl_WDR5_peak_15043	chr6	112552433	112553124	+	799	NA	intron (NM_001105206, intron 2 of 38)	intron (NM_001105206, intron 2 of 38)	-5019	NR_121193	101927640	Hs.510007	NR_121193		LOC101927640	-	uncharacterized LOC101927640	ncRNA
9_siCtrl_WDR5_peak_10821	chr20	32889988	32891184	+	798	NA	5' UTR (NM_001322085, exon 1 of 10)	5' UTR (NM_001322085, exon 1 of 10)	210	NM_001322084	191	Hs.388004	NM_000687	ENSG00000101444	AHCY	SAHH|adoHcyase	adenosylhomocysteinase	protein-coding
9_siCtrl_WDR5_peak_5944	chr15	77389683	77390389	+	797	NA	Intergenic	Intergenic	-26585	NM_001168412	10099	Hs.744863	NM_005724	ENSG00000140391	TSPAN3	TM4-A|TM4SF8|TSPAN-3	tetraspanin 3	protein-coding
9_siCtrl_WDR5_peak_10847	chr20	34824102	34825046	+	797	NA	5' UTR (NM_015511, exon 1 of 4)	5' UTR (NM_015511, exon 1 of 4)	174	NM_001271874	25980	Hs.11314	NM_015511	ENSG00000131043	AAR2	C20orf4|CGI-23	AAR2 splicing factor	protein-coding
9_siCtrl_WDR5_peak_11702	chr3	15642552	15643790	+	797	NA	promoter-TSS (NM_001281725)	promoter-TSS (NM_001281725)	-81	NM_001370753	686	Hs.444197	NM_001281723	ENSG00000169814	BTD	-	biotinidase	protein-coding
9_siCtrl_WDR5_peak_16208	chr7	132937523	132938182	+	797	NA	promoter-TSS (NM_021807)	promoter-TSS (NM_021807)	18	NM_021807	60412	Hs.321273	NM_021807	ENSG00000131558	EXOC4	SEC8|SEC8L1|Sec8p	exocyst complex component 4	protein-coding
9_siCtrl_WDR5_peak_12108	chr3	101292553	101293691	+	797	NA	promoter-TSS (NM_020357)	promoter-TSS (NM_020357)	98	NM_020357	57092	Hs.732633	NM_020357	ENSG00000081154	PCNP	-	PEST proteolytic signal containing nuclear protein	protein-coding
9_siCtrl_WDR5_peak_6897	chr17	7146083	7146528	+	796	NA	promoter-TSS (NM_007278)	promoter-TSS (NM_007278)	-537	NM_007278	11337	Hs.647421	NM_007278	ENSG00000170296	GABARAP	ATG8A|GABARAP-a|MM46	GABA type A receptor-associated protein	protein-coding
9_siCtrl_WDR5_peak_2047	chr10	43277855	43278719	+	796	NA	promoter-TSS (NM_014753)	promoter-TSS (NM_014753)	44	NM_014753	9790	Hs.10848	NM_014753	ENSG00000165733	BMS1	ACC|BMS1L	BMS1 ribosome biogenesis factor	protein-coding
9_siCtrl_WDR5_peak_10412	chr2	208889950	208890564	+	796	NA	promoter-TSS (NM_001080475)	promoter-TSS (NM_001080475)	-6	NM_001080475	389072	Hs.159188	NM_001080475	ENSG00000178385	PLEKHM3	DAPR|PLEKHM1L	pleckstrin homology domain containing M3	protein-coding
9_siCtrl_WDR5_peak_10917	chr20	44519437	44520247	+	795	NA	promoter-TSS (NM_080749)	promoter-TSS (NM_080749)	84	NM_080749	140825	Hs.517094	NM_080749	ENSG00000124257	NEURL2	C20orf163|OZZ|OZZ-E3	neuralized E3 ubiquitin protein ligase 2	protein-coding
9_siCtrl_WDR5_peak_5410	chr14	105219108	105219887	+	795	NA	promoter-TSS (NM_006427)	promoter-TSS (NM_006427)	13	NM_021709	10572	Hs.112058	NM_006427	ENSG00000184990	SIVA1	CD27BP|SIVA|Siva-1|Siva-2	SIVA1 apoptosis inducing factor	protein-coding
9_siCtrl_WDR5_peak_3789	chr12	49961620	49962577	+	794	NA	promoter-TSS (NM_006337)	promoter-TSS (NM_006337)	-170	NM_001278341	10445	Hs.25313	NM_006337	ENSG00000187778	MCRS1	ICP22BP|INO80Q|MCRS2|MSP58|P78	microspherule protein 1	protein-coding
9_siCtrl_WDR5_peak_3751	chr12	46553883	46554871	+	794	NA	Intergenic	Intergenic	105922	NM_001278389	81539	Hs.533770	NM_030674	ENSG00000111371	SLC38A1	ATA1|NAT2|SAT1|SNAT1	solute carrier family 38 member 1	protein-coding
9_siCtrl_WDR5_peak_10970	chr20	47537744	47538740	+	794	NA	promoter-TSS (NM_006420)	promoter-TSS (NM_006420)	-6	NM_006420	10564	Hs.62578	NM_006420	ENSG00000124198	ARFGEF2	BIG2|PVNH2|dJ1164I10.1	ADP ribosylation factor guanine nucleotide exchange factor 2	protein-coding
9_siCtrl_WDR5_peak_7275	chr17	42422086	42423205	+	794	NA	5' UTR (NM_002087, exon 1 of 13)	5' UTR (NM_002087, exon 1 of 13)	191	NM_002087	2896	Hs.514220	NM_002087	ENSG00000030582	GRN	CLN11|GEP|GP88|PCDGF|PEPI|PGRN	granulin precursor	protein-coding
9_siCtrl_WDR5_peak_6826	chr17	1466088	1466596	+	794	NA	promoter-TSS (NM_006224)	promoter-TSS (NM_006224)	-256	NM_006224	5306	Hs.429819	NM_006224	ENSG00000174238	PITPNA	HEL-S-36|PI-TPalpha|PITPN|VIB1A	phosphatidylinositol transfer protein alpha	protein-coding
9_siCtrl_WDR5_peak_5131	chr14	64108212	64109291	+	794	NA	promoter-TSS (NM_001008726)	promoter-TSS (NM_001008726)	-162	NM_080666	112840	Hs.655666	NM_080666	ENSG00000140006	WDR89	C14orf150|MSTP050	WD repeat domain 89	protein-coding
9_siCtrl_WDR5_peak_14205	chr5	176037243	176037858	+	794	NA	promoter-TSS (NM_052899)	promoter-TSS (NM_052899)	-393	NM_052899	114787	Hs.150549	NM_052899	ENSG00000169258	GPRIN1	GRIN1	G protein regulated inducer of neurite outgrowth 1	protein-coding
9_siCtrl_WDR5_peak_941	chr1	150038946	150040257	+	794	NA	promoter-TSS (NM_001279354)	promoter-TSS (NM_001279354)	162	NM_001279353	11311	Hs.443750	NM_007259	ENSG00000136631	VPS45	H1|H1VPS45|SCN5|VPS45A|VPS45B|VPS54A|VSP45|VSP45A	vacuolar protein sorting 45 homolog	protein-coding
9_siCtrl_WDR5_peak_11094	chr20	62338792	62339848	+	793	NA	promoter-TSS (NM_001267546)	promoter-TSS (NM_001267546)	8	NM_001134758	10139	Hs.389277	NM_003224	ENSG00000101246	ARFRP1	ARL18|ARP|Arp1	ADP ribosylation factor related protein 1	protein-coding
9_siCtrl_WDR5_peak_4392	chr12	123942272	123943274	+	793	NA	promoter-TSS (NM_022717)	promoter-TSS (NM_022717)	87	NR_104103	11066	Hs.632738	NM_007020	ENSG00000184209	SNRNP35	HM-1|U1SNRNPBP	small nuclear ribonucleoprotein U11/U12 subunit 35	protein-coding
9_siCtrl_WDR5_peak_8686	chr19	31513928	31514507	+	793	NA	Intergenic	MER70A|LTR|ERVL	-144199	NR_147209	107985312	Hs.211053	NR_147209	ENSG00000267777	LINC01791	-	long intergenic non-protein coding RNA 1791	ncRNA
9_siCtrl_WDR5_peak_10878	chr20	38199718	38200487	+	793	NA	Intergenic	LTR3A|LTR|ERVK	-346711	NR_027124	339568	Hs.434319	NR_027124	ENSG00000230324	LINC01734	-	long intergenic non-protein coding RNA 1734	ncRNA
9_siCtrl_WDR5_peak_3826	chr12	53573684	53574810	+	792	NA	promoter-TSS (NM_001004304)	promoter-TSS (NM_001004304)	183	NM_015989	51380	Hs.279815	NM_015989	ENSG00000139631	CSAD	CSD|PCAP	cysteine sulfinic acid decarboxylase	protein-coding
9_siCtrl_WDR5_peak_9166	chr2	677150	677851	+	792	NA	promoter-TSS (NM_001352681)	promoter-TSS (NM_001352681)	-94	NM_152834	129787	Hs.6729	NM_152834	ENSG00000151353	TMEM18	lncND	transmembrane protein 18	protein-coding
9_siCtrl_WDR5_peak_4668	chr13	46626369	46627383	+	792	NA	promoter-TSS (NM_001076788)	promoter-TSS (NM_001076788)	5	NM_001330567	23091	Hs.136102	NM_015070	ENSG00000123200	ZC3H13	KIAA0853|Xio	zinc finger CCCH-type containing 13	protein-coding
9_siCtrl_WDR5_peak_9583	chr2	55495869	55496620	+	792	NA	promoter-TSS (NM_001005369)	promoter-TSS (NM_001005369)	71	NM_001005369	4528	Hs.149894	NM_002453	ENSG00000085760	MTIF2	-	mitochondrial translational initiation factor 2	protein-coding
9_siCtrl_WDR5_peak_17577	chr9	100395069	100396485	+	792	NA	promoter-TSS (NM_001351504)	promoter-TSS (NM_001351504)	72	NM_001351505	4686	Hs.595669	NM_002486	ENSG00000136937	NCBP1	CBP80|NCBP|Sto1	nuclear cap binding protein subunit 1	protein-coding
9_siCtrl_WDR5_peak_15107	chr6	122792310	122793128	+	791	NA	promoter-TSS (NM_001270393)	promoter-TSS (NM_001270393)	233	NM_020755	57515	Hs.146668	NM_020755	ENSG00000111897	SERINC1	TDE1L|TDE2|TMS-2|TMS2	serine incorporator 1	protein-coding
9_siCtrl_WDR5_peak_2228	chr10	78850311	78851017	+	791	NA	intron (NM_001322832, intron 9 of 27)	intron (NM_001322832, intron 9 of 27)	-49925	NR_120654	101929310	Hs.666457	NR_120654	ENSG00000225497	KCNMA1-AS2	-	KCNMA1 antisense RNA 2	ncRNA
9_siCtrl_WDR5_peak_1074	chr1	156710620	156711313	+	791	NA	promoter-TSS (NM_145729)	promoter-TSS (NM_145729)	-86	NM_024540	79590	Hs.418233	NM_024540	ENSG00000143314	MRPL24	L24mt|MRP-L18|MRP-L24	mitochondrial ribosomal protein L24	protein-coding
9_siCtrl_WDR5_peak_6050	chr15	88971216	88972359	+	791	NA	Intergenic	(TC)n|Simple_repeat|Simple_repeat	38832	NM_022163	26589	Hs.534261	NM_022163	ENSG00000259494	MRPL46	C15orf4|LIECG2|P2ECSL	mitochondrial ribosomal protein L46	protein-coding
9_siCtrl_WDR5_peak_2200	chr10	75544908	75545632	+	790	NA	promoter-TSS (NM_001367799)	promoter-TSS (NM_001367799)	-94	NM_001242487	23053	Hs.65135	NM_015037	ENSG00000214655	ZSWIM8	KIAA0913	zinc finger SWIM-type containing 8	protein-coding
9_siCtrl_WDR5_peak_8009	chr18	22006143	22007668	+	790	NA	intron (NM_018439, intron 1 of 10)	CpG	271	NM_018439	55364	Hs.515317	NM_018439	ENSG00000154059	IMPACT	RWDD5	impact RWD domain protein	protein-coding
9_siCtrl_WDR5_peak_17276	chr9	33076085	33076825	+	790	NA	intron (NM_018225, intron 1 of 11)	intron (NM_018225, intron 1 of 11)	217	NM_018225	55234	Hs.655351	NM_018225	ENSG00000122692	SMU1	BWD|SMU-1|fSAP57	SMU1 DNA replication regulator and spliceosomal factor	protein-coding
9_siCtrl_WDR5_peak_185	chr1	27226468	27227200	+	790	NA	exon (NM_022078, exon 1 of 7)	exon (NM_022078, exon 1 of 7)	124	NM_022078	63906	Hs.10903	NM_022078	ENSG00000198746	GPATCH3	GPATC3	G-patch domain containing 3	protein-coding
9_siCtrl_WDR5_peak_16075	chr7	103766793	103767371	+	790	NA	3' UTR (NM_002553, exon 14 of 14)	3' UTR (NM_002553, exon 14 of 14)	81379	NM_002553	5001	Hs.432948	NM_002553	ENSG00000164815	ORC5	ORC5L|ORC5P|ORC5T|PPP1R117	origin recognition complex subunit 5	protein-coding
9_siCtrl_WDR5_peak_3703	chr12	40012681	40014306	+	790	NA	5' UTR (NM_005164, exon 1 of 10)	5' UTR (NM_005164, exon 1 of 10)	112	NM_005164	225	Hs.117852	NM_005164	ENSG00000173208	ABCD2	ABC39|ALDL1|ALDR|ALDRP|hALDR	ATP binding cassette subfamily D member 2	protein-coding
9_siCtrl_WDR5_peak_3600	chr12	17525412	17525808	+	789	NA	Intergenic	Intergenic	216402	NR_146522	105369678		NR_146522		LINC02378	-	long intergenic non-protein coding RNA 2378	ncRNA
9_siCtrl_WDR5_peak_10896	chr20	42285773	42286884	+	789	NA	Intergenic	CpG	-9331	NM_001278610	4605	Hs.179718	NM_002466	ENSG00000101057	MYBL2	B-MYB|BMYB	MYB proto-oncogene like 2	protein-coding
9_siCtrl_WDR5_peak_10753	chr20	23330829	23331987	+	789	NA	promoter-TSS (NM_013248)	promoter-TSS (NM_013248)	-20	NM_013248	29107	Hs.516933	NM_013248	ENSG00000132661	NXT1	MTR2|P15	nuclear transport factor 2 like export factor 1	protein-coding
9_siCtrl_WDR5_peak_5455	chr15	28331365	28331782	+	789	NA	intron (NM_001300984, intron 1 of 22)	L1MDa|LINE|L1	12888	NM_001300984	4948	Hs.654411	NM_000275	ENSG00000104044	OCA2	BEY|BEY1|BEY2|BOCA|D15S12|EYCL|EYCL2|EYCL3|HCL3|P|PED|SHEP1	OCA2 melanosomal transmembrane protein	protein-coding
9_siCtrl_WDR5_peak_17759	chr9	131084294	131085613	+	789	NA	promoter-TSS (NM_001305942)	promoter-TSS (NM_001305942)	106	NM_001329863	26995	Hs.632685	NM_015679	ENSG00000167112	TRUB2	CLONE24922	TruB pseudouridine synthase family member 2	protein-coding
9_siCtrl_WDR5_peak_9288	chr2	19358165	19359149	+	789	NA	Intergenic	Intergenic	-131931	NR_135287	400945	Hs.502854	NR_135287	ENSG00000236204	LINC01376	-	long intergenic non-protein coding RNA 1376	ncRNA
9_siCtrl_WDR5_peak_5055	chr14	51915518	51916785	+	789	NA	Intergenic	Intergenic	-39695	NM_001042481	122786	Hs.434914	NM_152330	ENSG00000139926	FRMD6	C14orf31|EX1|Willin|c14_5320	FERM domain containing 6	protein-coding
9_siCtrl_WDR5_peak_14925	chr6	95188031	95188791	+	789	NA	Intergenic	Intergenic	760390	NR_152795	643432	Hs.509936	NR_015362		TSG1	-	tumor suppressor TSG1	ncRNA
9_siCtrl_WDR5_peak_7515	chr17	57286938	57287660	+	788	NA	promoter-TSS (NM_018149)	promoter-TSS (NM_018149)	-72	NM_018149	55181	Hs.7296	NM_018149	ENSG00000167447	SMG8	C17orf71	SMG8 nonsense mediated mRNA decay factor	protein-coding
9_siCtrl_WDR5_peak_5716	chr15	59980810	59981654	+	788	NA	promoter-TSS (NM_001320675)	promoter-TSS (NM_001320675)	-107	NM_001320675	663	Hs.592515	NM_004330	ENSG00000140299	BNIP2	BNIP-2|NIP2	BCL2 interacting protein 2	protein-coding
9_siCtrl_WDR5_peak_10923	chr20	44774148	44774980	+	788	NA	Intergenic	Intergenic	27611	NM_001322421	958	Hs.472860	NM_001250	ENSG00000101017	CD40	Bp50|CDW40|TNFRSF5|p50	CD40 molecule	protein-coding
9_siCtrl_WDR5_peak_5309	chr14	93333619	93334390	+	788	NA	Intergenic	Intergenic	39823	NR_135253	101929002	Hs.639356	NR_135253	ENSG00000258499	LINC02287	-	long intergenic non-protein coding RNA 2287	ncRNA
9_siCtrl_WDR5_peak_16072	chr7	102984803	102985477	+	787	NA	promoter-TSS (NM_014377)	promoter-TSS (NM_014377)	74	NM_014377	27000	Hs.558476	NM_014377	ENSG00000105821	DNAJC2	MPHOSPH11|MPP11|ZRF1|ZUO1	DnaJ heat shock protein family (Hsp40) member C2	protein-coding
9_siCtrl_WDR5_peak_6556	chr16	48277938	48278706	+	786	NA	exon (NM_001348078, exon 1 of 17)	exon (NM_001348078, exon 1 of 17)	111	NM_031490	83752	Hs.295923	NM_031490	ENSG00000102910	LONP2	LONP|LONPL|PLON|PSLON	lon peptidase 2, peroxisomal	protein-coding
9_siCtrl_WDR5_peak_16494	chr8	22102275	22103145	+	786	NA	promoter-TSS (NM_001722)	promoter-TSS (NM_001722)	64	NM_001722	661	Hs.148342	NM_001722	ENSG00000168495	POLR3D	BN51T|RPC4|RPC53|TSBN51	RNA polymerase III subunit D	protein-coding
9_siCtrl_WDR5_peak_5254	chr14	81687324	81688193	+	786	NA	promoter-TSS (NM_001278940)	promoter-TSS (NM_001278940)	-24	NM_201595	2957	Hs.592334	NM_015859	ENSG00000165417	GTF2A1	TF2A1|TFIIA|TFIIA-42|TFIIAL	general transcription factor IIA subunit 1	protein-coding
9_siCtrl_WDR5_peak_8618	chr19	19248768	19249633	+	786	NA	promoter-TSS (NM_001256766)	promoter-TSS (NM_001256766)	87	NM_017814	54929	Hs.631629	NM_017814	ENSG00000064545	TMEM161A	AROS-29	transmembrane protein 161A	protein-coding
9_siCtrl_WDR5_peak_3612	chr12	21809873	21810983	+	786	NA	5' UTR (NM_001174097, exon 1 of 8)	5' UTR (NM_001174097, exon 1 of 8)	300	NM_001174097	3945	Hs.446149	NM_002300	ENSG00000111716	LDHB	HEL-S-281|LDH-B|LDH-H|LDHBD|TRG-5	lactate dehydrogenase B	protein-coding
9_siCtrl_WDR5_peak_5533	chr15	40330844	40331803	+	786	NA	promoter-TSS (NM_003134)	promoter-TSS (NM_003134)	59	NM_003134	6727	Hs.533732	NM_003134	ENSG00000140319	SRP14	ALURBP	signal recognition particle 14	protein-coding
9_siCtrl_WDR5_peak_8759	chr19	37406677	37407590	+	786	NA	promoter-TSS (NM_198539)	promoter-TSS (NM_198539)	60	NM_001037232	374899	Hs.720312	NM_001037232	ENSG00000185869	ZNF829	-	zinc finger protein 829	protein-coding
9_siCtrl_WDR5_peak_4158	chr12	102799754	102800201	+	786	NA	intron (NM_000618, intron 3 of 3)	intron (NM_000618, intron 3 of 3)	72351	NM_001111284	3479	Hs.160562	NM_000618	ENSG00000017427	IGF1	IGF|IGF-I|IGFI|MGF	insulin like growth factor 1	protein-coding
9_siCtrl_WDR5_peak_9055	chr19	54959936	54960915	+	785	NA	promoter-TSS (NR_126418)	promoter-TSS (NR_126418)	48	NM_052925	114823	Hs.502378	NM_052925	ENSG00000167615	LENG8	pp13842	leukocyte receptor cluster member 8	protein-coding
9_siCtrl_WDR5_peak_7226	chr17	40950364	40951206	+	785	NA	promoter-TSS (NM_001330222)	promoter-TSS (NM_001330222)	-63	NM_001040431	28958	Hs.16059	NM_001040431	ENSG00000183978	COA3	CCDC56|COX25|HSPC009|MITRAC12	cytochrome c oxidase assembly factor 3	protein-coding
9_siCtrl_WDR5_peak_6327	chr16	11439076	11439818	+	785	NA	promoter-TSS (NR_135174)	promoter-TSS (NR_135174)	131	NM_152308	116028	Hs.347524	NM_152308	ENSG00000175643	RMI2	BLAP18|C16orf75	RecQ mediated genome instability 2	protein-coding
9_siCtrl_WDR5_peak_18084	chrX	75369038	75369843	+	785	NA	Intergenic	CpG	-23324	NM_001300888	51260	Hs.370100	NM_016500	ENSG00000102390	PBDC1	CXorf26	polysaccharide biosynthesis domain containing 1	protein-coding
9_siCtrl_WDR5_peak_12190	chr3	122134499	122135556	+	785	NA	promoter-TSS (NR_125405)	promoter-TSS (NR_125405)	-26	NR_125405	102723582	Hs.675056	NR_125405	ENSG00000272758	LOC102723582	-	uncharacterized LOC102723582	ncRNA
9_siCtrl_WDR5_peak_5059	chr14	52455902	52456900	+	785	NA	exon (NM_016039, exon 1 of 8)	exon (NM_016039, exon 1 of 8)	137	NM_016039	51637	Hs.534457	NM_016039	ENSG00000087302	RTRAF	C14orf166|CGI-99|CGI99|CLE|CLE7|LCRP369|RLLM1|hCLE|hCLE1	RNA transcription, translation and transport factor	protein-coding
9_siCtrl_WDR5_peak_2643	chr11	560550	561247	+	785	NA	promoter-TSS (NM_003475)	promoter-TSS (NM_003475)	-72	NM_001143993	8045	Hs.72925	NM_003475	ENSG00000099849	RASSF7	C11orf13|HRAS1|HRC1	Ras association domain family member 7	protein-coding
9_siCtrl_WDR5_peak_3873	chr12	56320433	56321371	+	784	NA	promoter-TSS (NM_001143853)	promoter-TSS (NM_001143853)	7	NM_001143853	84305	Hs.505687	NM_032345	ENSG00000170473	PYM1	PYM|WIBG	PYM homolog 1, exon junction complex associated factor	protein-coding
9_siCtrl_WDR5_peak_6830	chr17	1627629	1628369	+	784	NA	promoter-TSS (NM_001163809)	promoter-TSS (NM_001163809)	1	NM_001163811	124997	Hs.234572	NM_152348	ENSG00000167716	WDR81	CAMRQ2|HYC3|PPP1R166|SORF-2	WD repeat domain 81	protein-coding
9_siCtrl_WDR5_peak_7286	chr17	42976318	42977062	+	784	NA	promoter-TSS (NM_001258353)	promoter-TSS (NM_001258353)	46	NM_001258353	9343	Hs.151787	NM_004247	ENSG00000108883	EFTUD2	MFDGA|MFDM|SNRNP116|Snrp116|Snu114|U5-116KD	elongation factor Tu GTP binding domain containing 2	protein-coding
9_siCtrl_WDR5_peak_7464	chr17	55333162	55334734	+	783	NA	promoter-TSS (NM_170721)	promoter-TSS (NM_170721)	64	NM_001322251	124540	Hs.658922	NM_138962	ENSG00000153944	MSI2	MSI2H	musashi RNA binding protein 2	protein-coding
9_siCtrl_WDR5_peak_2513	chr10	120591708	120592223	+	783	NA	Intergenic	Intergenic	-77483	NM_153810	143384	Hs.420024	NM_153810	ENSG00000151893	CACUL1	C10orf46|CAC1	CDK2 associated cullin domain 1	protein-coding
9_siCtrl_WDR5_peak_7986	chr18	14132002	14132715	+	781	NA	promoter-TSS (NM_145287)	promoter-TSS (NM_145287)	76	NM_145287	162655	Hs.352635	NM_145287	ENSG00000175322	ZNF519	HsT2362	zinc finger protein 519	protein-coding
9_siCtrl_WDR5_peak_8325	chr19	2944728	2945730	+	781	NA	promoter-TSS (NM_021217)	promoter-TSS (NM_021217)	-260	NM_021217	58492	Hs.38004	NM_021217	ENSG00000175691	ZNF77	pT1	zinc finger protein 77	protein-coding
9_siCtrl_WDR5_peak_2164	chr10	70939404	70940449	+	781	NA	promoter-TSS (NM_001323585)	promoter-TSS (NM_001323585)	-64	NM_001301683	6832	Hs.106469	NM_003171	ENSG00000156502	SUPV3L1	SUV3	Suv3 like RNA helicase	protein-coding
9_siCtrl_WDR5_peak_14835	chr6	79576711	79577856	+	780	NA	promoter-TSS (NM_001010844)	promoter-TSS (NM_001010844)	15	NM_001010844	134728	Hs.656212	NM_001010844	ENSG00000146243	IRAK1BP1	AIP70|SIMPL	interleukin 1 receptor associated kinase 1 binding protein 1	protein-coding
9_siCtrl_WDR5_peak_11558	chr22	44350769	44351692	+	780	NA	promoter-TSS (NM_015380)	promoter-TSS (NM_015380)	-92	NM_015380	25813	Hs.505824	NM_015380	ENSG00000100347	SAMM50	CGI-51|OMP85|SAM50|TOB55|TRG-3|YNL026W	SAMM50 sorting and assembly machinery component	protein-coding
9_siCtrl_WDR5_peak_18083	chrX	75364928	75365638	+	780	NA	Intergenic	CpG	-27481	NM_001300888	51260	Hs.370100	NM_016500	ENSG00000102390	PBDC1	CXorf26	polysaccharide biosynthesis domain containing 1	protein-coding
9_siCtrl_WDR5_peak_6415	chr16	25122454	25123332	+	780	NA	promoter-TSS (NM_001032391)	promoter-TSS (NM_001032391)	-17	NR_120306	102723510	Hs.569596	NR_120306		LCMT1-AS1	-	LCMT1 antisense RNA 1	ncRNA
[truncated: 16,593 more rows]

## Sheet: siMYCN_WDR5_p-7
PeakID (cmd=annotatePeaks.pl p-7narrowpeak/10_siMYCN_WDR5_macspeaks.txt hg19)	Chr	Start	End	Strand	Peak Score	Focus Ratio/Region Size	Annotation	Detailed Annotation	Distance to TSS	Nearest PromoterID	Entrez ID	Nearest Unigene	Nearest Refseq	Nearest Ensembl	Gene Name	Gene Alias	Gene Description	Gene Type
[truncated: 15,612 more rows]
