# Supplementary material for: MYCN drives oncogenesis by cooperating with the histone methyltransferase G9a and the WDR5 adaptor to orchestrate global gene transcription
Source: PLoS Biol. 2024 Mar 28;22(3):e3002240. doi: 10.1371/journal.pbio.3002240 (PMC11003700; doi:10.1371/journal.pbio.3002240)
Supplement: S6 Table — (XLSX) [file pbio.3002240.s013.xlsx]

## Sheet: siMYCN_RNA_IMR32_48h_q<0.05_1.5
Table S6. Genes commonly and differentially regulated by MYCN and WDR5 in IMR32 cells.
Gene ID	Chromosome	Start	Stop	Length	Strand	Total counts	Maximum counts	Geometric mean	Arithmetic mean	P-value (siMYCN vs. siCtrl)	FDR step up (siMYCN vs. siCtrl)	Ratio (siMYCN vs. siCtrl)	Log2(Ratio) (siMYCN vs. siCtrl)	Fold change (siMYCN vs. siCtrl)	LSMean(siMYCN) (siMYCN vs. siCtrl)	LSMean(siCtrl) (siMYCN vs. siCtrl)	FC 95% lower limit (siMYCN vs. siCtrl)	FC 95% upper limit (siMYCN vs. siCtrl)
AASS	7	122073549	122144256	70707	-	88.0019	19.5693	14.0862	14.667	2.57294e-06	4.55754e-05	0.569085	-0.813284	-1.75721	10.639	18.695	-2.02168	-1.52733
ABAT	16	8674596	8784576	109980	+	61.4666	14.638	9.76324	10.2444	9.5763e-05	0.000690811	1.77895	0.831028	1.77895	13.116	7.37287	1.43546	2.20464
ABCA17P	16	2339150	2426700	87550	+	7.95791	1.83058	1.2834	1.32632	0.0215042	0.049283	0.639684	-0.644569	-1.56327	1.03486	1.61777	-2.23714	-1.09239
ABCA3	16	2275881	2340747	64866	-	73.812	17.7681	11.7908	12.302	0.000460529	0.00230656	1.67494	0.744109	1.67494	15.406	9.19796	1.33241	2.10552
ABCB6	2	219209772	219218995	9223	-	72.7401	16.5182	11.6909	12.1233	1.85119e-05	0.000201708	0.591773	-0.756885	-1.68984	9.01418	15.2325	-1.9837	-1.43951
ABCC4	13	95019835	95301476	281641	-	398.331	86.0894	63.7279	66.3884	1.50863e-08	1.35207e-06	0.562924	-0.828987	-1.77644	47.8227	84.9541	-1.93555	-1.63041
ABCC9	12	21797401	21942530	145129	-	14.4535	3.70571	2.25249	2.40892	0.000122008	0.000837879	0.486081	-1.04073	-2.05727	1.57586	3.24197	-2.70109	-1.56691
ABCE1	4	145098288	145129525	31237	+	2018.03	431.332	326.784	336.339	4.72674e-07	1.39362e-05	0.624886	-0.678334	-1.60029	258.693	413.985	-1.76534	-1.45067
ABLIM1	10	114431113	114768062	336949	-	1013.49	216.455	165.304	168.915	5.6609e-07	1.56026e-05	0.66358	-0.591659	-1.50698	134.756	203.074	-1.64416	-1.38124
AC000093.1	22	19717220	19724773	7553	+	7.41716	1.98452	1.1641	1.23619	0.013014	0.0329254	1.7594	0.815085	1.7594	1.5764	0.895986	1.14883	2.69447
AC002467.1	7	107739999	107744582	4583	-	7.06231	1.89392	1.03916	1.17705	0.00158302	0.00609429	2.36319	1.24073	2.36319	1.65414	0.699962	1.45565	3.83654
AC004453.1	7	44467897	44468305	408	+	265.667	59.2409	43.1679	44.2779	7.55798e-05	0.000576237	0.660477	-0.598419	-1.51406	35.2242	53.3315	-1.75735	-1.30445
AC004477.3	17	48066704	48067294	590	-	8.17743	1.81221	1.33039	1.36291	0.0190402	0.0447734	1.50456	0.58934	1.50456	1.63747	1.08834	1.08344	2.08935
AC005225.4	14	73580694	73582919	2225	+	11.6644	2.62387	1.85041	1.94406	0.00109897	0.00458316	1.81686	0.861444	1.81686	2.50781	1.3803	1.34072	2.46209
AC005537.2	7	42954135	43113932	159797	-	10.6926	3.3525	1.41636	1.7821	4.91319e-06	7.54713e-05	3.93172	1.97516	3.93172	2.84148	0.722708	2.72858	5.66536
AC005670.3	17	46983287	47100324	117037	-	471.87	95.6147	76.9824	78.6451	2.24129e-07	8.64142e-06	1.51332	0.597719	1.51332	94.7076	62.5826	1.3964	1.64003
AC006963.2	X	117894632	117895684	1052	-	14.0643	4.21025	2.09865	2.34404	0.00041058	0.00211189	2.35865	1.23796	2.35865	3.29226	1.39582	1.61597	3.44267
AC007068.1	12	9695384	9696228	844	+	640.829	150.882	101.295	106.805	7.53162e-08	4.18277e-06	0.524908	-0.929865	-1.9051	73.5293	140.08	-2.13127	-1.70293
AC007182.2	14	75595805	75596207	402	-	32.9134	6.99818	5.35246	5.48557	0.00117268	0.00480034	0.663389	-0.592073	-1.50741	4.37549	6.59566	-1.86026	-1.22149
AC007405.4	2	170766878	170778730	11852	+	9.42191	2.45602	1.44851	1.57032	0.0163626	0.0395774	1.76875	0.822732	1.76875	2.00632	1.13431	1.08638	2.87973
AC008026.1	17	62516321	62516768	447	-	20.8892	4.8509	3.36653	3.48153	0.00132192	0.00526628	0.617932	-0.694481	-1.6183	2.65938	4.30368	-2.07531	-1.26193
AC008038.1	7	133034607	133035921	1314	-	4454.32	972.293	723.849	742.386	1.76289e-05	0.000194542	0.656988	-0.606061	-1.5221	588.705	896.067	-1.73078	-1.33857
AC008966.1	5	53109816	53127674	17858	+	14.1062	3.12598	2.27637	2.35103	0.00287078	0.00974912	1.60992	0.686991	1.60992	2.90045	1.80161	1.22055	2.1235
AC009275.1	7	134368737	134432535	63798	-	11.1742	2.94477	1.68381	1.86237	8.9016e-05	0.000652222	2.41015	1.26912	2.41015	2.63248	1.09225	1.74693	3.32518
AC009549.1	11	19710934	19712620	1686	-	11.7605	2.89458	1.85567	1.96009	0.000389686	0.00202676	1.92129	0.942077	1.92129	2.57825	1.34193	1.44572	2.55331
AC010168.2	12	14762504	14767932	5428	-	7.9866	1.75433	1.26932	1.3311	0.00151485	0.00589095	1.84556	0.884057	1.84556	1.72664	0.935563	1.33669	2.54815
AC010478.1	5	51372736	51383333	10597	-	83.56	17.7587	13.5036	13.9267	5.54801e-06	8.19258e-05	1.64047	0.714108	1.64047	17.3047	10.5486	1.43594	1.87413
AC010680.2	2	178578790	178580907	2117	+	10.7443	2.2934	1.74207	1.79071	0.0141072	0.0350814	1.50602	0.590743	1.50602	2.1523	1.42913	1.09719	2.06718
AC010931.1	15	74125915	74129342	3427	-	275.363	63.7074	43.5421	45.8939	5.20823e-08	3.24806e-06	1.91097	0.934307	1.91097	60.2562	31.5317	1.71431	2.13019
AC011472.3	19	11322156	11324196	2040	+	23.5646	5.52536	3.7678	3.92743	0.000847223	0.00373225	1.6959	0.762053	1.6959	4.94123	2.91363	1.31037	2.19486
AC011504.1	19	30553956	30558059	4103	+	25.754	5.68354	4.10232	4.29233	0.00267075	0.00922256	1.65374	0.725732	1.65374	5.34973	3.23493	1.22396	2.23442
AC012435.2	15	74478070	74490287	12217	-	18.837	4.77726	2.88292	3.13949	5.02016e-05	0.000425143	2.22726	1.15527	2.22726	4.33338	1.94561	1.69011	2.93511
AC013394.1	15	92883413	92949231	65818	+	10.8117	2.25613	1.74329	1.80195	0.00769269	0.0214738	1.57947	0.65944	1.57947	2.20675	1.39715	1.14896	2.17128
AC015712.6	15	100849831	100876837	27006	+	13.1258	2.94477	2.06701	2.18763	0.000498489	0.00245043	1.90247	0.927876	1.90247	2.86783	1.50742	1.41592	2.55622
AC016717.2	2	225698514	225703655	5141	+	24.1705	6.79775	3.66682	4.02842	0.000229749	0.0013607	2.19854	1.13654	2.19854	5.53792	2.51891	1.5847	3.05015
AC018521.5	17	47891229	47895813	4584	-	12.2326	2.99212	1.92151	2.03877	0.000778719	0.00348262	1.91205	0.935121	1.91205	2.67731	1.40023	1.39719	2.61664
AC019069.1	2	74832655	74833988	1333	-	111.288	24.2081	17.9707	18.548	4.45128e-06	7.01271e-05	0.608733	-0.716119	-1.64276	14.0369	23.0592	-1.87221	-1.44142
AC021074.1	3	142827096	142827729	633	-	9.78498	2.7092	1.52181	1.63083	0.00567033	0.0168025	0.530975	-0.913284	-1.88333	1.13121	2.13045	-2.80429	-1.26482
AC021092.1	19	44103007	44113184	10177	-	214.173	44.337	34.8445	35.6954	2.08835e-05	0.000220967	1.52025	0.604305	1.52025	43.0639	28.3269	1.33345	1.7332
AC022107.1	5	69186359	69189453	3094	-	12.9247	3.08418	2.04828	2.15412	0.000575482	0.00275681	1.85018	0.887665	1.85018	2.79668	1.51157	1.39295	2.45749
AC022148.1	19	37545470	37549172	3702	-	9.09327	2.24048	1.40148	1.51555	0.00563428	0.016709	1.92011	0.94119	1.92011	1.99309	1.03801	1.24624	2.95835
AC022336.2	3	124723788	124726326	2538	+	14.4582	4.40508	2.03196	2.4097	3.88336e-05	0.000352472	3.07521	1.62068	3.07521	3.63679	1.18262	2.11269	4.47624
AC022364.1	12	28163298	28190739	27441	-	16.5945	4.24177	2.5197	2.76575	2.11892e-05	0.000222981	2.3547	1.23554	2.3547	3.88261	1.64888	1.80259	3.0759
AC023024.2	15	101299656	101301649	1993	-	21.3106	4.92834	3.44835	3.55177	0.0015038	0.00585256	0.632903	-0.659943	-1.58002	2.75329	4.35025	-2.00523	-1.24498
AC024560.5	3	197665316	197674864	9548	+	24.8328	6.73764	3.44056	4.1388	0.00136043	0.00538799	2.66507	1.41417	2.66507	6.01909	2.25851	1.51208	4.69722
AC025048.2	17	60122642	60135744	13102	-	7.44365	1.631	1.20531	1.24061	0.00802104	0.0223122	1.6133	0.690019	1.6133	1.53176	0.949456	1.16567	2.23283
AC025171.1	5	43013060	43067453	54393	-	23.9821	5.1646	3.88939	3.99701	0.00111441	0.00462049	1.56052	0.642027	1.56052	4.87199	3.12203	1.24827	1.95088
AC026273.1	2	94195806	94208380	12574	-	9.57861	2.35582	1.51646	1.59644	0.00948563	0.0255793	1.68844	0.755693	1.68844	2.00524	1.18763	1.15272	2.47314
AC026748.3	5	1345197	1350787	5590	+	12.9044	3.17129	2.03548	2.15073	0.000369023	0.00194546	1.91324	0.936016	1.91324	2.82494	1.47652	1.44406	2.53486
AC027228.2	15	78589123	78591277	2154	-	467.127	107.539	72.9595	77.8545	1.37007e-09	3.81279e-07	2.06847	1.04857	2.06847	104.964	50.7448	1.89733	2.25505
AC027313.1	5	106415576	106417242	1666	-	9.28599	2.10518	1.46662	1.54767	0.00268425	0.00925029	1.81453	0.8596	1.81453	1.99556	1.09977	1.2781	2.57611
AC027644.3	7	66739829	66740386	557	-	9.1049	2.02737	1.46321	1.51748	0.00292644	0.00989595	1.70023	0.765727	1.70023	1.911	1.12397	1.25106	2.31066
AC044787.1	15	47730144	47730936	792	-	92.4138	20.1702	15.0092	15.4023	0.000109575	0.000768729	0.650889	-0.619516	-1.53636	12.1452	18.6594	-1.80267	-1.30939
AC046134.2	3	139389761	139782700	392939	+	30.446	7.46815	4.78831	5.07433	0.000150521	0.000985966	1.89112	0.919243	1.89112	6.63838	3.51028	1.47321	2.42759
AC055839.2	17	5499439	5501146	1707	-	54.9256	13.5195	8.56716	9.15426	5.36253e-06	8.01891e-05	2.03858	1.02756	2.03858	12.2832	6.02536	1.6831	2.46914
AC064799.1	15	71341158	71341713	555	-	184.351	41.3065	29.4205	30.7251	2.89494e-07	1.01959e-05	0.556573	-0.845356	-1.79671	21.9723	39.4779	-2.01875	-1.59909
AC068205.2	11	43578889	43840031	261142	+	7.81394	1.91988	1.23837	1.30232	0.0145748	0.0359731	0.595393	-0.748086	-1.67956	0.972041	1.63261	-2.5095	-1.1241
AC068700.1	8	78605952	78609706	3754	+	28.5476	6.88546	4.37866	4.75793	5.62226e-06	8.25228e-05	2.24785	1.16855	2.24785	6.58596	2.92989	1.80535	2.79882
AC073508.3	17	40648300	40649719	1419	+	10.2632	2.61684	1.62392	1.71053	0.00138282	0.00545907	1.85011	0.887613	1.85011	2.22073	1.20032	1.34878	2.53779
AC073861.1	3	101576489	101576948	459	-	550.226	128.804	86.5088	91.7043	1.89936e-08	1.61661e-06	0.505809	-0.983336	-1.97703	61.6079	121.801	-2.19368	-1.78178
AC079776.1	2	129992889	129994041	1152	+	55.2815	13.4022	8.91112	9.21358	0.000191898	0.00119328	1.6224	0.698127	1.6224	11.4003	7.02684	1.34001	1.96429
AC083843.3	8	134792020	134798273	6253	-	20.3908	4.86651	3.22161	3.39846	0.00121995	0.00494596	0.560261	-0.835828	-1.78488	2.44065	4.35627	-2.40743	-1.32332
AC083899.1	2	87125198	87196630	71432	+	17.337	4.22712	2.75181	2.8895	0.0144184	0.0356586	0.610896	-0.711002	-1.63694	2.19156	3.58745	-2.32791	-1.15106
AC090114.2	7	128524016	128531070	7054	-	34.9776	9.29752	5.15542	5.82959	5.68798e-06	8.3179e-05	2.62474	1.39217	2.62474	8.44263	3.21656	2.01435	3.42007
AC090517.5	15	56795460	56918500	123040	-	14.2929	3.83949	2.22577	2.38215	0.000395091	0.00205014	2.01404	1.01009	2.01404	3.18359	1.5807	1.49036	2.72172
AC092329.4	19	23259906	23274252	14346	-	29.0216	6.14947	4.66006	4.83694	0.000567839	0.00272599	1.65596	0.727671	1.65596	6.03155	3.64232	1.30691	2.09825
AC093503.3	19	46636810	46639162	2352	-	8.38377	2.76301	1.01285	1.39729	1.20318e-06	2.63473e-05	5.30677	2.40783	5.30677	2.35148	0.44311	3.61696	7.78603
AC093849.2	4	173509633	173511765	2132	+	157.658	35.0757	25.5635	26.2763	5.74124e-06	8.3527e-05	1.58316	0.662805	1.58316	32.2082	20.3443	1.39892	1.79166
AC095057.3	4	40166675	40167832	1157	+	8.32553	2.01747	1.31624	1.38759	0.00621342	0.0180831	1.75693	0.813061	1.75693	1.76856	1.00662	1.20291	2.56613
AC097376.3	4	139411927	139454035	42108	-	17.1153	3.66962	2.75399	2.85254	0.00163919	0.00626818	1.6367	0.710786	1.6367	3.54136	2.16373	1.25484	2.13476
AC104083.1	4	155734448	155737063	2615	+	32.8315	7.57065	5.22463	5.47192	0.00490465	0.0149291	0.623008	-0.682678	-1.60512	4.2009	6.74293	-2.18931	-1.17681
AC105052.4	7	102579104	102679296	100192	-	8.42166	1.79347	1.35002	1.40361	0.00767383	0.0214389	1.65026	0.722691	1.65026	1.74799	1.05922	1.16434	2.33896
AC106881.1	4	95549129	95552458	3329	+	8.56503	2.40114	1.2785	1.42751	0.00155026	0.00599589	2.307	1.20602	2.307	1.99169	0.863324	1.48952	3.57312
AC108047.1	2	190534855	190569777	34922	+	16.0981	4.07869	2.44191	2.68301	0.000588249	0.00280704	2.16709	1.11576	2.16709	3.67172	1.69431	1.49502	3.14127
AC108488.3	2	3568505	3575101	6596	-	23.5626	5.98413	3.66803	3.9271	1.71745e-05	0.000191294	2.08615	1.06085	2.08615	5.30922	2.54498	1.6708	2.60476
AC113935.1	1	77129114	77129669	555	+	1160.13	245.101	187.926	193.356	7.4449e-07	1.85206e-05	0.6274	-0.672542	-1.59388	149.086	237.625	-1.76592	-1.4386
AC124068.1	15	89201091	89201769	678	-	29.5087	7.09792	4.74427	4.91812	0.00164579	0.00628594	1.60359	0.681301	1.60359	6.05828	3.77796	1.24675	2.06255
AC124242.1	8	18084386	18097645	13259	+	8.4992	1.9625	1.35754	1.41653	0.00364439	0.0117567	1.73991	0.799013	1.73991	1.79907	1.034	1.24691	2.42783
AC136621.1	16	55704119	55706423	2304	+	112.819	29.7318	16.1998	18.8032	2.81889e-09	5.37296e-07	3.04184	1.60495	3.04184	28.3022	9.30428	2.63995	3.50492
AC139768.1	12	51201684	51202582	898	-	12.7144	3.3525	1.91152	2.11906	0.000160123	0.00103188	2.36554	1.24217	2.36554	2.97885	1.25927	1.68078	3.32928
AC144530.1	3	197850400	197850955	555	-	9.28058	2.20859	1.47689	1.54676	0.00543003	0.0161967	0.58234	-0.780066	-1.71721	1.13849	1.95503	-2.44233	-1.20737
AC241584.1	1	147082338	147083579	1241	-	7.07577	1.80203	1.13254	1.1793	0.0182894	0.0433523	0.613734	-0.704314	-1.62937	0.897017	1.46157	-2.39219	-1.1098
AC244033.2	1	150045660	150067702	22042	-	44.449	9.30499	7.24939	7.40817	0.000218411	0.00131529	1.50587	0.590594	1.50587	8.90367	5.91266	1.27473	1.77892
AC244197.3	X	149477104	149540927	63823	-	7.75011	2.29043	1.1715	1.29169	0.000734682	0.003342	2.30668	1.20582	2.30668	1.80211	0.781257	1.5629	3.40443
ACAD11	3	132558138	132660083	101945	-	83.3697	17.4736	13.5405	13.8949	1.06199e-05	0.000132095	0.635425	-0.654207	-1.57375	10.7974	16.9925	-1.79335	-1.38104
ACAP2	3	195274745	195443045	168300	-	405.324	96.7985	63.587	67.554	1.67468e-07	7.14935e-06	0.503445	-0.990095	-1.98632	45.2424	89.8656	-2.26004	-1.74574
ACAP3	1	1292390	1309610	17220	-	11.2184	3.36037	1.70934	1.86974	0.000767849	0.00344997	2.17407	1.1204	2.17407	2.56134	1.17813	1.5095	3.13122
ACP2	11	47239302	47248907	9605	-	66.3816	14.4063	10.7862	11.0636	0.000597969	0.0028424	1.50126	0.586174	1.50126	13.2808	8.84642	1.24081	1.81638
ACSF2	17	50426158	50474846	48688	+	32.3011	7.70156	5.19857	5.38352	0.00157261	0.00606674	1.59595	0.674415	1.59595	6.61941	4.14763	1.24951	2.03844
ACSL6	5	131949973	132012244	62271	-	24.3623	6.22762	3.87902	4.06038	0.00063896	0.00299249	1.75057	0.807826	1.75057	5.16837	2.95239	1.35644	2.25923
ACSS1	20	25006230	25058981	52751	-	47.0589	9.9115	7.60633	7.84315	4.92031e-05	0.000418269	0.613841	-0.704062	-1.62909	5.96645	9.71985	-1.92579	-1.3781
ACSS2	20	34872146	34927963	55817	+	94.8631	21.0363	15.3262	15.8105	2.40019e-05	0.000245701	1.62048	0.696423	1.62048	19.5541	12.0669	1.39357	1.88434
ACTN2	1	236664141	236764632	100491	+	12.4316	3.12532	1.9259	2.07194	0.000365026	0.00193555	0.482335	-1.05189	-2.07325	1.34837	2.79551	-2.84159	-1.51266
ACTRT3	3	169766921	169769562	2641	-	7.54044	1.79531	1.21352	1.25674	0.0138158	0.0345153	1.60617	0.68362	1.60617	1.54904	0.964437	1.12286	2.2975
ADAM19	5	157395534	157575776	180242	-	102.328	22.289	16.5426	17.0547	5.8404e-06	8.46233e-05	1.62882	0.703829	1.62882	21.1342	12.9752	1.4273	1.85879
ADAMTS20	12	43353866	43552204	198338	-	59.3954	14.8079	8.80324	9.89923	2.75173e-07	9.83768e-06	0.379898	-1.39632	-2.63229	5.45069	14.3478	-3.19386	-2.16946
ADAMTS4	1	161184302	161199055	14753	-	149.746	34.4313	23.9934	24.9576	2.22086e-05	0.0002321	1.69913	0.764798	1.69913	31.4221	18.4931	1.43924	2.00596
ADAMTS7	15	78759206	78811465	52259	-	11.7862	3.13021	1.86885	1.96437	0.00433127	0.0135401	1.74557	0.803697	1.74557	2.4978	1.43094	1.24714	2.44319
ADAMTSL1	9	17906563	18910951	1004388	+	27.9765	6.70489	4.3822	4.66275	0.000203843	0.00125107	1.92175	0.942424	1.92175	6.13375	3.19175	1.4692	2.51371
ADAT2	6	143422832	143450696	27864	-	118.254	26.5209	18.705	19.709	1.51506e-06	3.08321e-05	0.530137	-0.915563	-1.8863	13.6569	25.7611	-2.19208	-1.62318
ADCY5	3	123282296	123449759	167463	-	22.8731	5.06351	3.60196	3.81219	3.783e-05	0.000347323	1.94984	0.963353	1.94984	5.0397	2.58468	1.56075	2.43592
ADCY7	16	50246137	50318136	71999	+	32.4697	7.99416	5.1829	5.41162	0.00024389	0.0014196	1.73717	0.796739	1.73717	6.86907	3.95417	1.38483	2.17915
ADGRA2	8	37784191	37844897	60706	+	142.045	33.9476	22.9683	23.6741	0.000527922	0.00256807	1.5379	0.62096	1.5379	28.6918	18.6565	1.26834	1.86474
ADGRG1	16	57610652	57665581	54929	+	49.1802	14.3158	6.95891	8.1967	9.55876e-08	4.77339e-06	3.18278	1.67029	3.18278	12.4742	3.91926	2.59003	3.9112
ADGRG6	6	142301854	142446267	144413	+	28.4492	6.26032	4.61302	4.74153	0.0024315	0.00858256	1.51446	0.598803	1.51446	5.71165	3.77141	1.1942	1.9206
ADGRL1	19	14147743	14206188	58445	-	206.465	47.7382	33.4847	34.4108	0.000120153	0.000827495	1.53389	0.617196	1.53389	41.6612	27.1605	1.30758	1.79937
ADSS1	14	104724186	104747326	23140	+	9.50323	2.58759	1.43002	1.58387	0.000228597	0.00135565	2.39274	1.25866	2.39274	2.23406	0.933683	1.67835	3.41119
ADSS2	1	244408494	244451910	43416	-	566.955	122.443	91.8282	94.4925	5.14062e-07	1.48333e-05	0.624166	-0.679998	-1.60214	72.6268	116.358	-1.76877	-1.45121
AEN	15	88621337	88632282	10945	+	357.671	78.0211	57.8871	59.6118	1.25316e-06	2.70479e-05	0.62187	-0.685315	-1.60805	45.7136	73.51	-1.79462	-1.44088
AF127577.4	21	14818843	15014431	195588	-	189.707	43.6591	30.4474	31.6178	1.35118e-06	2.85445e-05	1.71572	0.778812	1.71572	39.9506	23.2851	1.51373	1.94466
AF131215.6	8	11104691	11106705	2014	-	17.9435	3.89613	2.88996	2.99058	0.00195226	0.00720872	1.61546	0.691945	1.61546	3.69431	2.28685	1.23767	2.10857
AFF1	4	86935002	87141055	206053	+	502.283	105.988	81.5188	83.7138	1.29837e-07	5.91612e-06	0.630951	-0.664401	-1.58491	64.7712	102.656	-1.72481	-1.45635
AFF3	2	99545419	100192429	647010	-	386.185	80.6845	62.9022	64.3641	3.12434e-07	1.06141e-05	1.53519	0.618418	1.53519	77.9517	50.7765	1.40882	1.6729
AFF4	5	132875395	132963635	88240	-	2071.4	457.016	334.323	345.233	5.08501e-08	3.21568e-06	1.65463	0.726509	1.65463	430.367	260.099	1.5208	1.80024
AGPAT4	6	161129967	161274062	144095	-	277.223	60.7054	44.8469	46.2038	1.93184e-06	3.68219e-05	1.6128	0.68957	1.6128	57.0404	35.3673	1.43726	1.80979
AGPAT5	8	6708642	6761504	52862	+	1306.97	279.577	211.737	217.828	3.18688e-06	5.43859e-05	0.633218	-0.659227	-1.57924	168.909	266.747	-1.77426	-1.40565
AHNAK	11	62433542	62556236	122694	-	1337.33	363.826	181.467	222.889	1.59828e-10	1.03357e-07	3.72651	1.89783	3.72651	351.464	94.3145	3.27806	4.23631
AHNAK2	14	104937244	104978375	41131	-	16.7705	4.23495	2.48695	2.79508	0.000247848	0.00143555	2.39121	1.25774	2.39121	3.94173	1.64842	1.64164	3.48303
AIDAP2	4	158270378	158278677	8299	+	7.97871	1.75273	1.29277	1.32979	0.0192455	0.045162	1.52844	0.612061	1.52844	1.60771	1.05186	1.08205	2.15899
AJAP1	1	4654609	4792535	137926	+	7.06944	2.21993	1.00053	1.17824	5.23687e-05	0.000439371	3.13467	1.64831	3.13467	1.78655	0.569931	2.1261	4.6217
AJUBA	14	22971177	22982552	11375	-	10.3225	2.85744	1.48486	1.72042	7.37565e-06	9.98147e-05	0.331191	-1.59426	-3.0194	0.856057	2.58478	-4.09963	-2.22381
AK1	9	127866486	127877676	11190	-	40.1509	10.055	6.3459	6.69182	0.00116475	0.00477945	1.76476	0.819471	1.76476	8.54284	4.8408	1.33692	2.32952
AK4	1	65147549	65232146	84597	+	519.426	112.647	84.0442	86.571	1.96387e-07	8.00512e-06	0.616696	-0.697369	-1.62154	66.0458	107.096	-1.77855	-1.4784
AK4P1	17	31345519	31346191	672	+	32.3233	8.33836	5.03352	5.38722	0.000579009	0.00277175	0.522802	-0.935662	-1.91277	3.69904	7.07541	-2.59421	-1.41033
AKAP6	14	32329298	32837685	508387	+	113.712	25.7434	18.1656	18.952	1.37276e-06	2.8862e-05	1.77989	0.831785	1.77989	24.269	13.6351	1.55646	2.03539
AKR1C1	10	4963253	4983284	20031	+	13.9649	3.6738	1.97814	2.32749	1.99927e-06	3.78937e-05	3.19195	1.67444	3.19195	3.54452	1.11046	2.40756	4.23189
AKR1C2	10	4987400	5018032	30632	-	13.5623	3.23209	2.08601	2.26039	3.98925e-05	0.000358476	2.23228	1.15852	2.23228	3.12214	1.39864	1.70656	2.91995
AKTIP	16	53491040	53504412	13372	-	55.2439	11.2752	8.99346	9.20731	0.000159834	0.0010305	1.51957	0.60366	1.51957	11.106	7.30865	1.28816	1.79254
AL049830.1	14	30821419	30821844	425	+	7.81184	2.0951	1.20237	1.30197	0.00932169	0.0252496	0.533783	-0.905674	-1.87342	0.906219	1.69773	-2.97272	-1.18063
AL049838.1	14	57993545	57994526	981	-	13.506	3.3525	2.1335	2.251	0.00421511	0.013232	1.73288	0.793173	1.73288	2.85465	1.64734	1.22438	2.45257
AL049840.2	14	103682362	103684016	1654	-	8.70161	1.94811	1.39622	1.45027	0.0085022	0.0233388	1.63838	0.712268	1.63838	1.80117	1.09936	1.15758	2.31888
AL050341.2	1	40256427	40257968	1541	-	24.1763	5.47779	3.83261	4.02938	0.00179452	0.00674963	1.71879	0.781391	1.71879	5.09466	2.9641	1.26764	2.3305
AL121871.1	X	92676519	92676955	436	-	31.7986	7.34868	5.06785	5.29976	0.000142355	0.000942507	0.565076	-0.823484	-1.76967	3.82699	6.77253	-2.20845	-1.41807
AL122020.1	14	90766531	90766990	459	+	12.8195	3.163	1.98703	2.13658	0.00451015	0.0139383	0.541424	-0.88517	-1.84698	1.50095	2.77222	-2.75525	-1.23812
AL133260.1	6	151099529	151099934	405	+	6.85449	1.72447	1.05907	1.14242	0.00752475	0.0211008	0.526546	-0.92537	-1.89917	0.788098	1.49673	-2.97842	-1.21099
AL133338.1	6	100881471	100882988	1517	+	13.1827	2.71826	2.14053	2.19712	0.00249886	0.00876316	1.57623	0.656474	1.57623	2.68855	1.70569	1.21886	2.03837
AL138478.1	14	89156743	89157575	832	+	26.1665	6.60255	4.04094	4.36108	0.0199456	0.0464266	1.64225	0.715675	1.64225	5.42113	3.30103	1.04014	2.59292
AL139100.2	6	34744176	34744674	498	+	7.38981	1.84473	1.1598	1.23163	0.0142997	0.0354519	0.580081	-0.785674	-1.7239	0.904318	1.55895	-2.66133	-1.11667
AL158212.3	10	112823490	112827727	4237	+	66.7547	14.1798	10.718	11.1258	5.10099e-06	7.70444e-05	1.72381	0.785599	1.72381	14.0823	8.16928	1.4903	1.99391
AL161772.1	13	20699307	20703719	4412	-	25.2936	5.94037	4.02939	4.21561	0.000646535	0.00302077	1.73539	0.79526	1.73539	5.34894	3.08227	1.34109	2.24563
AL162581.1	6	52995620	52995951	331	+	7.01291	2.18026	1.05021	1.16882	0.00437566	0.0136442	2.19173	1.13207	2.19173	1.60523	0.732403	1.35985	3.53251
AL353743.1	9	85805359	85849543	44184	+	45.1856	10.1459	7.30251	7.53093	0.000219868	0.00132126	0.624907	-0.678286	-1.60024	5.79249	9.26936	-1.93855	-1.32097
AL353746.1	9	27937617	27944498	6881	-	8.62184	2.20959	1.2701	1.43697	0.00330334	0.0109168	2.22531	1.15401	2.22531	1.98289	0.89106	1.32521	3.73678
AL353759.1	6	26160765	26172803	12038	-	10.7474	2.62765	1.71723	1.79123	0.0017821	0.00671039	1.7521	0.809084	1.7521	2.28075	1.30172	1.29971	2.36195
AL355032.1	14	101677943	101678381	438	+	25.2433	6.2057	3.9778	4.20722	9.77941e-05	0.000701353	0.524922	-0.929826	-1.90505	2.89649	5.51796	-2.41937	-1.50006
AL355802.1	6	43538822	43539704	882	-	9.58621	2.77522	1.47922	1.5977	0.0103775	0.0274402	0.540287	-0.888202	-1.85087	1.12085	2.07455	-2.8716	-1.19296
AL356019.2	14	20260480	20264309	3829	-	11.3002	2.67886	1.81992	1.88337	0.0161409	0.0391321	0.649599	-0.622379	-1.53941	1.48331	2.28343	-2.15966	-1.0973
AL356599.1	6	145799409	145887431	88022	+	36.0333	8.64453	5.52971	6.00554	0.000678295	0.00313182	2.00525	1.00378	2.00525	8.01438	3.9967	1.4236	2.82454
AL358115.1	1	165889725	165900996	11271	-	7.03436	1.57312	1.07766	1.17239	0.0204303	0.0473836	0.562401	-0.83033	-1.77809	0.844027	1.50076	-3.03961	-1.04014
AL358781.1	9	131497479	131500192	2713	-	298.351	67.7911	47.6185	49.7251	7.10405e-08	4.02255e-06	0.555762	-0.847462	-1.79933	35.5264	63.9239	-1.99183	-1.62544
AL390195.2	1	111438638	111441365	2727	-	19.9199	6.27231	3.04801	3.31999	0.0140043	0.0348767	0.544979	-0.875728	-1.83493	2.3422	4.29777	-2.84106	-1.18511
AL391069.2	1	151346967	151348028	1061	+	19.0726	4.32702	3.06761	3.17877	0.0139773	0.0348225	1.50346	0.588283	1.50346	3.81803	2.5395	1.08861	2.0764
AL392083.1	10	1290018	1293003	2985	-	9.15579	2.2806	1.46781	1.52596	0.0121779	0.0312069	1.62029	0.696255	1.62029	1.8872	1.16473	1.13938	2.30418
AL392172.1	1	222815022	222837385	22363	+	24.6335	5.44691	3.98416	4.10558	0.0028606	0.00971944	0.646298	-0.629728	-1.54727	3.22351	4.98765	-1.98621	-1.20534
AL445433.1	1	99008218	99008475	257	+	8.66262	2.10986	1.37654	1.44377	0.0090345	0.024546	0.59153	-0.757477	-1.69053	1.07322	1.81432	-2.46014	-1.16168
AL450306.1	10	77782866	77793177	10311	+	116.058	27.6667	18.726	19.343	0.000282972	0.00159362	1.57627	0.656511	1.57627	23.6697	15.0163	1.30238	1.90775
AL450405.1	6	117998975	117999449	474	+	611.522	127.342	99.4074	101.92	2.48911e-07	9.27966e-06	0.641454	-0.640583	-1.55896	79.6576	124.183	-1.70083	-1.42892
AL591846.2	1	206695837	206696270	433	-	58.7777	12.9619	9.4908	9.79628	3.85087e-05	0.000350699	0.611606	-0.709325	-1.63504	7.4354	12.1572	-1.9246	-1.38904
AL592424.1	1	151130075	151131611	1536	-	9.43903	2.6753	1.42462	1.57317	0.00387858	0.0123794	2.08341	1.05895	2.08341	2.12593	1.02041	1.31691	3.29604
AL691432.2	1	1613758	1615796	2038	-	12.5214	3.08418	1.98284	2.0869	0.0021329	0.00772822	1.78547	0.836305	1.78547	2.67539	1.49842	1.29328	2.46498
AL929602.1	14	19324708	19327717	3009	-	7.73829	2.15852	1.11767	1.28971	0.0120808	0.0309934	0.471601	-1.08436	-2.12044	0.826625	1.7528	-4.02286	-1.11767
ALDH1A3	15	100877714	100916627	38913	+	221.066	53.5173	33.6538	36.8443	1.5807e-09	3.89655e-07	2.36734	1.24326	2.36734	51.8053	21.8834	2.13395	2.62625
ALDOC	17	28573115	28576949	3834	-	30.9458	7.96347	4.71008	5.15764	1.22931e-06	2.65996e-05	2.36026	1.23895	2.36026	7.24549	3.06978	1.93794	2.87463
ALG3	3	184242301	184249549	7248	-	72.2709	18.0552	11.6183	12.0452	0.000262366	0.00150068	0.613021	-0.705993	-1.63127	9.1554	14.9349	-1.99287	-1.33527
ALK	2	29192774	29921587	728813	-	244.841	67.9418	33.2817	40.8069	1.68023e-10	1.03357e-07	3.72016	1.89537	3.72016	64.3233	17.2905	3.27322	4.22813
ALPL	1	21509397	21578411	69014	+	12.8958	2.6699	2.08533	2.1493	0.0125335	0.0319006	1.5057	0.590439	1.5057	2.58308	1.71553	1.09833	2.06417
AMER2	13	25161684	25172289	10605	-	75.5764	19.2089	11.662	12.5961	3.92954e-07	1.22531e-05	2.18841	1.12989	2.18841	17.291	7.90115	1.86483	2.56814
AMER3	2	130755435	130768135	12700	+	278.784	59.4825	44.8181	46.4639	9.66569e-08	4.78522e-06	1.71149	0.775251	1.71149	58.656	34.2719	1.55465	1.88415
AMFR	16	56361452	56425546	64094	-	134.138	30.4418	21.5206	22.3563	1.52798e-06	3.10482e-05	1.72593	0.787374	1.72593	28.3099	16.4027	1.51841	1.96181
AMOTL2	3	134355874	134375480	19606	-	115.907	25.6796	18.3846	19.3178	1.74212e-07	7.29078e-06	1.8814	0.911804	1.8814	25.227	13.4087	1.6692	2.12058
ANK1	8	41653220	41896763	243543	-	46.3595	12.8208	6.9503	7.72659	5.49733e-07	1.54046e-05	2.51063	1.32805	2.51063	11.0514	4.40182	2.06745	3.04882
ANK2	4	112818032	113384222	566190	+	1890.67	424.843	301.539	315.111	1.35652e-08	1.27484e-06	1.80711	0.853681	1.80711	405.712	224.509	1.65569	1.97237
ANK2-AS1	4	112973272	113071963	98691	-	8.03929	1.79819	1.29308	1.33988	0.00889671	0.0242301	1.63831	0.712209	1.63831	1.66405	1.01571	1.16337	2.30715
ANK3	10	60026298	60733491	707193	-	493.504	117.948	75.9952	82.2506	4.24718e-09	6.54625e-07	2.22287	1.15242	2.22287	113.459	51.0418	1.99983	2.47078
ANKRD20A19P	13	23939557	23946783	7226	-	6.80668	1.62276	1.09222	1.13445	0.0138867	0.0346605	1.6379	0.711844	1.6379	1.40878	0.860115	1.12622	2.38204
ANKRD7	7	118214669	118496172	281503	+	8.04974	2.26523	1.25546	1.34162	0.0105949	0.0279253	1.81059	0.856459	1.81059	1.72856	0.954693	1.18291	2.77134
ANO4	12	100717526	101128642	411116	+	80.3182	18.0687	12.9149	13.3864	1.73464e-05	0.000192575	1.68279	0.750855	1.68279	16.7933	9.97943	1.43732	1.97018
ANO8	19	17323223	17334856	11633	-	18.0818	4.66627	2.86337	3.01363	0.00647377	0.0187068	1.68112	0.749425	1.68112	3.77922	2.24804	1.19905	2.35702
ANOS2P	Y	13703902	13915825	211923	+	12.5292	3.3287	1.9883	2.0882	0.0083871	0.0231166	0.594347	-0.750623	-1.68252	1.55689	2.6195	-2.38986	-1.18453
ANXA11	10	80150889	80205573	54684	-	70.4835	16.7094	11.2356	11.7473	2.76361e-05	0.000272396	1.76876	0.822736	1.76876	15.0089	8.48558	1.47295	2.12397
AOX1	2	200586014	200677065	91051	+	25.6229	5.85036	4.07753	4.27049	4.70094e-05	0.000405726	0.545735	-0.873726	-1.83239	3.01547	5.52551	-2.25059	-1.4919
AP001107.5	11	66409158	66417138	7980	+	13.9929	3.31433	2.25128	2.33215	0.0194937	0.0456259	1.52669	0.610412	1.52669	2.8183	1.84601	1.0954	2.12781
AP001372.2	11	74493366	74498534	5168	+	15.2574	3.80552	2.44985	2.54291	0.00248457	0.00872208	1.65478	0.726636	1.65478	3.17009	1.91572	1.25079	2.18924
AP001469.3	21	46251549	46254134	2585	-	7.10259	1.6331	1.14107	1.18377	0.0132845	0.0334348	1.62536	0.700758	1.62536	1.46574	0.901793	1.12385	2.35066
AP006333.1	11	64103188	64119174	15986	+	19.9022	4.68563	3.12246	3.31704	0.000269359	0.00153273	1.92025	0.941296	1.92025	4.36233	2.27175	1.45567	2.5331
AP006333.2	11	64118272	64119211	939	-	10.7058	2.37665	1.691	1.7843	0.000598404	0.00284347	1.8985	0.924859	1.8985	2.33741	1.23119	1.40762	2.56056
AP2A1	19	49766968	49807114	40146	+	64.3148	14.8233	10.4222	10.7191	0.000166263	0.00106184	1.56421	0.64543	1.56421	13.0777	8.36058	1.31334	1.86298
AP2A2	11	924894	1012246	87352	+	258.767	57.677	42.1108	43.1278	1.88649e-05	0.000204419	1.51744	0.601644	1.51744	51.9925	34.2632	1.33631	1.72314
APBA1	9	69427532	69672372	244840	-	359.639	78.872	57.7304	59.9399	1.11538e-07	5.33373e-06	1.7259	0.787345	1.7259	75.9016	43.9781	1.56337	1.90532
APBB1	11	6395124	6419415	24291	-	108.775	27.6647	17.2526	18.1292	6.70136e-05	0.000531472	1.792	0.841574	1.792	23.2719	12.9865	1.46349	2.19426
APBB3	5	140558268	140564782	6514	-	28.4866	6.35918	4.54601	4.74777	0.00036559	0.00193565	1.73008	0.790838	1.73008	6.01743	3.47812	1.35783	2.20438
APC2	19	1446302	1473245	26943	+	25.7256	8.07479	3.69884	4.2876	6.21454e-05	0.000500306	2.771	1.4704	2.771	6.30121	2.27399	1.94197	3.95393
APH1B	15	63276018	63309127	33109	+	244.472	52.6418	39.6206	40.7453	8.36489e-07	2.02871e-05	1.59928	0.67742	1.59928	50.1394	31.3513	1.44172	1.77405
APLP1	19	35867899	35879793	11894	+	160.046	43.4073	24.4988	26.6743	5.50938e-07	1.54046e-05	2.2492	1.16941	2.2492	36.9296	16.419	1.8971	2.66666
APRT	16	88809339	88811938	2599	-	11.5922	2.85691	1.83224	1.93203	0.00187957	0.00701238	0.549153	-0.86472	-1.82099	1.36976	2.49431	-2.5172	-1.31733
AQP11	11	77589391	77610357	20966	+	10.515	2.35584	1.69472	1.75251	0.00844867	0.0232248	1.58477	0.664278	1.58477	2.14899	1.35602	1.14767	2.18835
ARF5	7	127588386	127591701	3315	+	137.164	30.9891	22.274	22.8606	0.000129315	0.000874477	1.52382	0.607696	1.52382	27.6054	18.1159	1.29825	1.7886
ARF6	14	49893082	49897055	3973	+	631.601	136.461	102.678	105.267	3.93935e-05	0.000355172	0.661231	-0.596774	-1.51233	83.8002	126.734	-1.73488	-1.31833
ARFGEF3	6	138161939	138344664	182725	+	8.64907	2.54373	1.26159	1.44151	0.00119763	0.00487739	2.46568	1.30199	2.46568	2.05115	0.831877	1.52897	3.97626
ARHGAP1	11	46677080	46700620	23540	-	79.5146	17.3057	12.9078	13.2524	0.000358633	0.00190668	1.52088	0.604905	1.52088	15.9907	10.5141	1.26941	1.82216
ARHGAP18	6	129576132	129710178	134046	-	41.4034	9.1419	6.70096	6.90057	0.000129629	0.000875821	0.623777	-0.680897	-1.60314	5.30174	8.4994	-1.91989	-1.33864
ARHGAP29	1	94148988	94275069	126081	-	379.879	77.8881	61.9617	63.3132	5.9568e-07	1.6155e-05	1.51288	0.597301	1.51288	76.2355	50.3909	1.38456	1.6531
ARHGAP33	19	35774532	35788823	14291	+	8.07147	2.48578	1.2236	1.34524	0.00158048	0.0060919	2.20462	1.14053	2.20462	1.85092	0.839566	1.46603	3.31532
ARHGAP36	X	131058346	131089886	31540	+	29.0641	7.20323	4.33367	4.84402	5.61835e-07	1.55487e-05	2.59925	1.3781	2.59925	6.99636	2.69168	2.12043	3.1862
ARHGEF10	8	1823926	1958642	134716	+	96.3296	19.9493	15.6118	16.0549	0.000162809	0.00104665	0.646544	-0.62918	-1.54669	12.6085	19.5014	-1.84163	-1.29898
ARHGEF10L	1	17539698	17697875	158177	+	10.9549	2.90005	1.64472	1.82582	0.000216173	0.00130543	2.39315	1.25891	2.39315	2.57546	1.07618	1.67984	3.40936
ARHGEF26	3	154121003	154257828	136825	+	18.2382	4.59863	2.79676	3.0397	2.48531e-05	0.000251005	0.445628	-1.16609	-2.24403	1.87403	4.20537	-2.8976	-1.73787
ARHGEF28	5	73626158	73941994	315836	+	46.7054	11.2352	7.28298	7.78423	6.35636e-06	8.95116e-05	2.04387	1.0313	2.04387	10.4538	5.1147	1.67923	2.48769
ARHGEF3	3	56727418	57079330	351912	-	79.0818	16.6262	12.8793	13.1803	3.51355e-05	0.000327028	1.52714	0.610834	1.52714	15.9296	10.431	1.3285	1.75549
ARHGEF40	14	21070273	21090249	19976	+	29.4759	6.77774	4.64309	4.91265	1.4239e-05	0.000165263	1.95403	0.966454	1.95403	6.49923	3.32606	1.60144	2.38426
ARID3BP1	1	81501794	81503469	1675	+	12.7026	2.73302	2.04293	2.11709	0.000964251	0.00414788	1.70429	0.76917	1.70429	2.66846	1.56573	1.31054	2.21635
ARL2	11	65014160	65022185	8025	+	34.34	7.56666	5.49408	5.72333	0.00151738	0.00589761	0.612178	-0.707977	-1.63351	4.34653	7.10012	-2.13059	-1.2524
ARL4D	17	43398993	43401138	2145	+	515.341	111.948	83.1455	85.8901	1.7346e-07	7.29078e-06	1.65821	0.729625	1.65821	107.158	64.6226	1.5073	1.82423
ARL8A	1	202133404	202144744	11340	-	98.7432	21.3125	16.0952	16.4572	6.31912e-05	0.000506565	1.50197	0.586853	1.50197	19.759	13.1554	1.303	1.73131
ARRDC2	19	18001132	18014103	12971	+	12.5559	3.07653	2.02083	2.09266	0.0119816	0.0307991	0.642998	-0.637113	-1.55521	1.63795	2.54736	-2.14999	-1.12498
ARSD	X	2903972	2929350	25378	-	45.0614	11.3698	6.81844	7.51023	6.79479e-06	9.38445e-05	2.34417	1.22908	2.34417	10.5289	4.49153	1.85016	2.97008
ARSJ	4	113900284	113979728	79444	-	11.6252	2.97566	1.79423	1.93754	0.000234104	0.00137865	0.46634	-1.10055	-2.14436	1.23239	2.64269	-2.92252	-1.57339
ASAP3	1	23428563	23484569	56006	-	34.8388	7.64125	5.65999	5.80646	0.0012957	0.0051847	1.51595	0.600226	1.51595	6.99721	4.61571	1.22741	1.87234
ASL	7	66075800	66094698	18898	+	11.439	3.28452	1.81169	1.9065	0.0125111	0.0318616	1.68875	0.755953	1.68875	2.39487	1.41814	1.17349	2.43024
ASTN2	9	116425225	117415071	989846	-	137.137	32.7282	21.7009	22.8561	1.2785e-06	2.74539e-05	1.88164	0.91199	1.88164	29.849	15.8633	1.62602	2.17745
ATCAY	19	3879864	3928083	48219	+	458.783	115.584	69.9619	76.4638	2.50599e-08	1.96032e-06	2.3178	1.21276	2.3178	106.835	46.0931	2.03219	2.64355
ATF7IP2	16	10326434	10483639	157205	+	83.6572	17.6799	13.6319	13.9429	6.40833e-05	0.000512553	0.662474	-0.594064	-1.50949	11.1121	16.7736	-1.74532	-1.30553
ATG4C	1	62784132	62865517	81385	+	149.452	33.1867	24.1306	24.9087	0.000106586	0.000751658	0.628909	-0.669078	-1.59006	19.2341	30.5833	-1.88761	-1.3394
ATG9B	7	151012209	151024500	12291	-	13.3505	2.9706	2.16355	2.22508	0.00355867	0.011549	0.633973	-0.657507	-1.57735	1.72664	2.72352	-2.06412	-1.20538
ATL1	14	50532509	50634018	101509	+	261.779	56.788	42.4195	43.6299	8.35127e-07	2.02871e-05	1.59995	0.67803	1.59995	53.6978	33.5621	1.44207	1.77512
ATP13A2	1	16985958	17011929	25971	-	9.47137	2.62387	1.44616	1.57856	0.00257318	0.0089496	2.05125	1.0365	2.05125	2.12243	1.0347	1.3478	3.12186
ATP1A3	19	41966582	41997498	30916	-	469.114	109.59	75.9477	78.1857	0.00073942	0.00335663	1.50595	0.590675	1.50595	93.9714	62.4	1.24447	1.82237
ATP1B1	1	169105697	169132723	27026	+	2705.81	592.002	436.282	450.968	4.97433e-08	3.16045e-06	1.66679	0.737074	1.66679	563.726	338.21	1.53003	1.81578
ATP1B2	17	7646627	7657771	11144	+	9.81061	2.6699	1.36624	1.6351	0.000514996	0.00251242	2.84358	1.50771	2.84358	2.41938	0.850823	1.69854	4.76051
ATP1B3	3	141876124	141926550	50426	+	419.952	95.2162	66.336	69.9919	4.94759e-09	6.90266e-07	0.517446	-0.950519	-1.93257	47.7342	92.2496	-2.1112	-1.76905
ATP2A3	17	3923870	3964465	40595	-	10.0047	2.44644	1.5252	1.66745	0.000367389	0.00194138	2.22398	1.15315	2.22398	2.30049	1.0344	1.56052	3.16953
ATP2B3	X	153517676	153582940	65264	+	97.4764	22.5093	15.7273	16.2461	4.85633e-05	0.000414904	1.62214	0.6979	1.62214	20.1007	12.3915	1.37717	1.91069
ATP2B4	1	203626561	203744082	117521	+	454.295	97.7232	72.6902	75.7158	6.82185e-08	3.92851e-06	1.76538	0.81998	1.76538	96.6719	54.7598	1.59987	1.94802
ATP6V0A1	17	42458844	42522612	63768	+	703.803	146.61	114.284	117.301	2.00753e-07	8.07094e-06	1.57331	0.653799	1.57331	143.434	91.1672	1.442	1.71657
ATP6V0D1	16	67438014	67481182	43168	-	103.715	24.3045	16.6777	17.2858	0.000755585	0.00340844	1.59333	0.672042	1.59333	21.2406	13.331	1.28319	1.97843
ATP6V0E2	7	149872968	149891205	18237	+	97.8145	21.6807	15.7506	16.3024	8.27074e-06	0.000108773	1.67097	0.740689	1.67097	20.3977	12.2071	1.44612	1.93078
ATP6V0E2-AS1	7	149867697	149880611	12914	-	17.5609	3.92629	2.80734	2.92682	0.000299141	0.00165845	1.76772	0.821886	1.76772	3.73867	2.11497	1.39013	2.24785
ATP6V1G2	6	31544462	31548428	3966	-	104.783	27.1134	15.3081	17.4638	1.54571e-08	1.35832e-06	2.82334	1.4974	2.82334	25.7922	9.13534	2.41582	3.2996
ATP8A2	13	25371974	26025852	653878	+	66.6137	17.4986	9.25882	11.1023	4.60647e-09	6.719e-07	3.43983	1.78234	3.43983	17.2034	5.00122	2.91639	4.05721
ATP9A	20	51596514	51768391	171877	-	900.439	190.478	145.798	150.073	8.13097e-08	4.31516e-06	1.61387	0.690522	1.61387	185.318	114.828	1.48376	1.75539
B3GALNT2	1	235447190	235504453	57263	-	694.654	158.303	109.251	115.776	1.18827e-09	3.63284e-07	0.503456	-0.990063	-1.98627	77.5386	154.013	-2.15261	-1.83279
B3GNT4	12	122203681	122208953	5272	+	7.86247	1.8765	1.24018	1.31041	0.00610647	0.017838	1.78038	0.832187	1.78038	1.67821	0.942613	1.20855	2.62278
B4GALNT1	12	57623409	57633240	9831	-	326.226	73.6592	52.8757	54.3709	1.2986e-05	0.00015471	1.56656	0.647597	1.56656	66.3731	42.3688	1.37256	1.78798
B4GALNT3	12	459939	563510	103571	+	26.1369	6.35469	4.10724	4.35615	0.0110713	0.0289803	0.611329	-0.709979	-1.63578	3.3054	5.40691	-2.40644	-1.11192
BAALC	8	103140713	103230306	89593	+	106.391	25.4603	16.877	17.7319	1.43722e-06	2.96042e-05	1.85934	0.894788	1.85934	23.0609	12.4028	1.60878	2.14892
BACE2	21	41167801	41282531	114730	+	12.8215	3.25925	1.92559	2.13691	2.79026e-05	0.000274622	0.403306	-1.31005	-2.47951	1.22828	3.04554	-3.32327	-1.84998
BACH2	6	89926528	90296909	370381	-	150.787	33.1427	24.2178	25.1312	3.90759e-07	1.22411e-05	1.72338	0.785237	1.72338	31.8064	18.4559	1.54141	1.92682
BAK1	6	33572547	33580294	7747	-	45.9938	10.6389	7.30176	7.66564	3.72169e-05	0.0003421	0.548952	-0.865248	-1.82165	5.43344	9.89784	-2.22396	-1.49212
BASP1	5	17065598	17276844	211246	+	2268.11	464.045	369.779	378.018	2.24922e-07	8.64734e-06	1.51532	0.59962	1.51532	455.463	300.573	1.3976	1.64295
BAZ1A	14	34752731	34875648	122917	-	1112.59	239.762	180.645	185.431	1.40891e-07	6.30266e-06	0.635118	-0.654904	-1.57451	144.052	226.811	-1.71262	-1.44754
BBS12	4	122732702	122744943	12241	+	35.1822	8.15726	5.58166	5.8637	5.21706e-05	0.000438253	1.83585	0.876446	1.83585	7.59199	4.13541	1.48832	2.26452
BCAS4	20	50794894	50882677	87783	+	87.6903	20.3786	14.0134	14.615	1.10287e-05	0.000135806	1.75358	0.810302	1.75358	18.6148	10.6153	1.48976	2.06411
BCAT1	12	24810024	24949102	139078	-	6017.42	1307.96	969.8	1002.9	3.74722e-07	1.18358e-05	0.60243	-0.731134	-1.65994	754.079	1251.73	-1.8412	-1.49653
BCHE	3	165772904	165837463	64559	-	130.643	28.1715	21.1787	21.7739	1.14774e-05	0.00014031	0.632377	-0.661142	-1.58133	16.8702	26.6775	-1.80758	-1.38341
BCL11A	2	60450520	60554468	103948	-	431.947	93.0365	70.3352	71.9912	2.5136e-06	4.4936e-05	0.656209	-0.607773	-1.52391	57.0475	86.9349	-1.6914	-1.373
BCL2	18	63123346	63320129	196783	-	705.03	153.935	114.097	117.505	1.04302e-07	5.07738e-06	1.62061	0.696538	1.62061	145.333	89.6776	1.48588	1.76756
BCL7C	16	30833626	30894961	61335	-	22.1857	5.01917	3.52917	3.69761	0.00174287	0.0065865	1.70101	0.766387	1.70101	4.65727	2.73795	1.26817	2.28157
BCL9L	11	118893875	118925609	31734	-	36.8853	8.1936	5.94729	6.14754	0.000195216	0.00121019	1.63911	0.712911	1.63911	7.63628	4.6588	1.34506	1.99744
BDKRB2	14	96204679	96244167	39488	+	22.0791	6.76665	3.09706	3.67985	7.03803e-07	1.79709e-05	3.28404	1.71547	3.28404	5.64177	1.71794	2.5403	4.24552
BLACAT1	1	205434885	205457092	22207	-	8.656	2.18831	1.378	1.44267	0.00725699	0.0205157	0.584697	-0.774238	-1.71029	1.06459	1.82075	-2.45103	-1.19341
BMERB1	16	15434475	15625029	190554	+	138.994	31.6695	22.5445	23.1656	2.90605e-05	0.000283339	1.56236	0.643726	1.56236	28.2498	18.0815	1.3551	1.80131
BMF	15	40087890	40108893	21003	-	45.2751	11.5539	6.96964	7.54584	1.01984e-06	2.34726e-05	2.22027	1.15074	2.22027	10.4052	4.68646	1.85528	2.65708
BMS1P22	22	15805263	15820885	15622	-	7.35197	1.81158	1.15464	1.22533	0.00129236	0.00517595	0.508771	-0.974911	-1.96552	0.826383	1.62427	-2.7777	-1.39082
BOD1	5	173607145	173616660	9515	-	355.826	74.0231	57.9386	59.3044	5.6866e-07	1.56099e-05	0.650684	-0.619971	-1.53684	46.7545	71.8544	-1.68413	-1.40244
BORA	13	72727749	72756199	28450	+	177.292	38.2257	28.5273	29.5487	3.59602e-07	1.1532e-05	0.588641	-0.76454	-1.69883	21.8974	37.2	-1.89208	-1.52531
BRF1	14	105209286	105315590	106304	-	30.1229	7.01443	4.87434	5.02048	0.00280565	0.00956875	1.52994	0.613476	1.52994	6.07211	3.96885	1.19988	1.9508
BRINP1	9	119153458	119369436	215978	-	23.9275	5.9381	3.73807	3.98792	5.896e-05	0.000480956	2.01049	1.00755	2.01049	5.32649	2.64935	1.57681	2.56344
BRSK1	19	55282072	55312563	30491	+	40.4528	10.0809	6.33442	6.74213	9.02614e-06	0.000115673	2.00455	1.00328	2.00455	8.9963	4.48795	1.64767	2.43872
BTBD11	12	107318421	107659643	341222	+	295.207	71.126	44.7332	49.2011	4.43035e-09	6.58856e-07	2.4074	1.26748	2.4074	69.5233	28.879	2.14154	2.70626
BTBD9	6	38168451	38640149	471698	-	99.9032	21.7906	16.2314	16.6505	0.000152839	0.000997764	1.52159	0.605581	1.52159	20.0947	13.2064	1.29091	1.7935
BTD	3	15601341	15722312	120971	+	103.527	22.289	16.8212	17.2545	1.62818e-05	0.000183924	1.5562	0.638028	1.5562	21.0089	13.5001	1.36153	1.7787
BTN3A2	6	26365159	26378321	13162	+	15.1513	3.52205	2.3675	2.52522	0.000105492	0.000745104	0.492525	-1.02173	-2.03035	1.66662	3.38383	-2.64768	-1.55696
BX679664.3	1	108992282	108992837	555	+	1134.99	247.573	182.684	189.164	3.7866e-08	2.58808e-06	0.591053	-0.758641	-1.6919	140.544	237.785	-1.84349	-1.55276
C11orf68	11	65916810	65919063	2253	-	25.5877	5.98005	4.12422	4.26461	0.00610681	0.017838	1.54851	0.63088	1.54851	5.18247	3.34675	1.17853	2.03463
C11orf71	11	114391443	114400512	9069	-	26.9899	6.18833	4.37645	4.49831	0.00500244	0.0151789	1.50319	0.58803	1.50319	5.40256	3.59406	1.17266	1.92689
C11orf80	11	66744451	66843329	98878	+	30.109	6.7502	4.9036	5.01817	0.00123184	0.00497955	1.50136	0.586269	1.50136	6.02399	4.01236	1.22181	1.84486
C11orf96	11	43925342	43943879	18537	+	33.1439	9.3444	4.77363	5.52398	2.65806e-07	9.6419e-06	2.98459	1.57753	2.98459	8.27529	2.77267	2.40715	3.70057
C12orf57	12	6942978	6946004	3026	+	88.7599	20.8132	14.4148	14.7933	0.000570873	0.00273732	1.50511	0.589865	1.50511	17.7761	11.8105	1.25272	1.80834
C12orf66	12	64186316	64222297	35981	-	90.0059	19.855	14.6184	15.001	2.98245e-05	0.000289122	0.642133	-0.639056	-1.55731	11.7318	18.2701	-1.79603	-1.35032
C14orf132	14	96039324	96093890	54566	+	3132.07	709.291	500.839	522.011	8.38744e-08	4.43387e-06	1.76485	0.819544	1.76485	666.417	377.606	1.5968	1.95059
C15orf39	15	75195643	75212170	16527	+	41.5312	9.33111	6.64464	6.92187	0.00242141	0.00854917	0.624708	-0.678747	-1.60075	5.32299	8.52076	-2.11026	-1.21426
C15orf62	15	40769980	40772450	2470	+	16.2355	4.55717	2.43458	2.70592	4.76114e-05	0.000409355	2.44753	1.29133	2.44753	3.84207	1.56977	1.81327	3.30366
C18orf25	18	46173553	46266993	93440	+	287.9	59.5614	46.7761	47.9834	2.54629e-07	9.41501e-06	0.635857	-0.653226	-1.57268	37.3023	58.6646	-1.71904	-1.43878
C18orf32	18	49477250	49487253	10003	-	278.305	73.9109	41.2139	46.3841	1.19624e-06	2.62378e-05	2.56445	1.35865	2.56445	66.7423	26.0259	2.0595	3.19322
C1QBP	17	5432777	5448831	16054	-	1119.55	244.599	181.158	186.592	3.0153e-07	1.04097e-05	0.619628	-0.690527	-1.61387	142.771	230.414	-1.77593	-1.4666
C1QL1	17	44959693	44968304	8611	-	29.3494	8.42378	4.5034	4.89156	0.00018945	0.0011804	2.12393	1.08674	2.12393	6.65145	3.13167	1.58815	2.84045
C1QL4	12	49332409	49337189	4780	-	19.6881	4.6032	3.11389	3.28135	0.000490955	0.00241955	1.8277	0.870031	1.8277	4.24183	2.32086	1.38849	2.40584
C1orf61	1	156404250	156456764	52514	-	23.9086	5.42805	3.82898	3.98477	0.000743352	0.00336785	0.592874	-0.754202	-1.6867	2.9663	5.00325	-2.16411	-1.31461
C2orf16	2	27537386	27582722	45336	+	52.2981	11.8241	8.28948	8.71635	1.98293e-05	0.000212977	1.84553	0.884034	1.84553	11.3064	6.12635	1.52445	2.23424
C2orf27A	2	131647990	131767405	119415	+	47.5182	10.394	7.64695	7.91971	3.07929e-05	0.000294294	0.593043	-0.753792	-1.68622	5.89654	9.94287	-1.9961	-1.42444
C3orf18	3	50558025	50571028	13003	-	19.8389	4.83336	3.17307	3.30648	0.00399432	0.0126801	1.62675	0.701989	1.62675	4.09541	2.51755	1.20823	2.19022
C3orf52	3	112086335	112131005	44670	+	11.9129	3.32869	1.64327	1.98548	1.01033e-05	0.000126483	0.294358	-1.76436	-3.39723	0.903059	3.0679	-4.84153	-2.38378
C3orf67	3	58717365	59050085	332720	-	25.0855	5.30665	4.03793	4.18092	0.000140954	0.000934904	1.69077	0.757683	1.69077	5.25425	3.1076	1.38	2.07153
C3orf80	3	160225496	160228214	2718	+	16.475	4.24141	2.4879	2.74584	6.24816e-05	0.000501916	0.424561	-1.23596	-2.35537	1.63668	3.855	-3.18513	-1.74178
C4orf50	4	5897373	6200556	303183	-	9.44331	2.06823	1.48725	1.57389	0.00540805	0.0161454	1.77165	0.825092	1.77165	2.01207	1.1357	1.20649	2.60155
C6orf120	6	169702190	169704857	2667	+	336.405	77.7153	54.2198	56.0675	6.1481e-06	8.76736e-05	0.609117	-0.71521	-1.64172	42.4477	69.6873	-1.87834	-1.43491
C7orf25	7	42908726	42912306	3580	-	12.9844	3.46398	1.99585	2.16407	0.00193625	0.00715937	1.99408	0.995721	1.99408	2.88258	1.44557	1.3514	2.94239
CA12	15	63321378	63381847	60469	-	129.263	33.4877	18.4965	21.5438	3.84198e-09	6.27346e-07	0.325227	-1.62048	-3.07478	10.5742	32.5134	-3.56412	-2.65262
CABLES1	18	23134564	23260468	125904	+	46.5263	10.7928	7.48325	7.75438	5.42509e-05	0.000450512	0.59481	-0.749499	-1.68121	5.78424	9.72452	-2.01038	-1.40594
CABLES2	20	62388632	62407286	18654	-	63.9106	14.3618	10.4096	10.6518	0.000215349	0.00130395	1.50408	0.588882	1.50408	12.796	8.50752	1.27571	1.77333
CACNA1C	12	1970786	2697951	727165	+	67.7136	14.1314	11.0172	11.2856	0.000144316	0.000953629	1.51951	0.603611	1.51951	13.6126	8.95855	1.29101	1.78846
CACNA2D2	3	50362799	50504245	141446	-	21.7462	5.16461	3.44946	3.62437	0.000190775	0.00118756	1.83217	0.873557	1.83217	4.68932	2.55943	1.43661	2.33667
CACNB1	17	39173453	39197704	24251	-	23.574	5.70824	3.66637	3.929	1.79653e-05	0.000197342	2.09167	1.06465	2.09167	5.31634	2.54167	1.66865	2.62193
CACNB3	12	48813794	48828942	15148	+	89.0283	21.8188	13.9823	14.8381	2.05648e-06	3.88149e-05	1.96891	0.9774	1.96891	19.6805	9.99561	1.67241	2.31799
CACNG2	22	36563921	36703559	139638	-	6.76076	1.56515	1.06457	1.12679	0.00863824	0.0236451	1.78381	0.834961	1.78381	1.44405	0.809534	1.1776	2.70207
CACNG4	17	66964707	67033399	68692	+	334.168	79.1439	52.8517	55.6947	6.8227e-07	1.76833e-05	1.88199	0.912257	1.88199	72.7392	38.6502	1.64104	2.15831
CACNG5	17	66835117	66894752	59635	+	16.2513	3.59627	2.61933	2.70855	0.00335549	0.0110567	1.59454	0.673142	1.59454	3.32922	2.08788	1.20425	2.11133
CACNG7	19	53909335	53943942	34607	+	10.7305	2.62766	1.69382	1.78842	0.00440276	0.0136971	1.77482	0.827672	1.77482	2.2878	1.28903	1.24224	2.53573
CADM1	11	115169218	115504958	335740	-	944.775	223.223	144.652	157.462	7.30245e-11	8.984e-08	2.30455	1.20448	2.30455	219.624	95.3005	2.13734	2.48484
CADM4	19	43622368	43639851	17483	-	40.0343	9.01533	6.39534	6.67238	5.96345e-05	0.00048558	1.7557	0.812047	1.7557	8.50217	4.8426	1.4403	2.14017
CADPS	3	62398346	62875417	477071	-	20.6328	4.86809	3.19692	3.43881	6.49348e-05	0.000517528	2.08937	1.06307	2.08937	4.65139	2.22622	1.60492	2.72004
CALB1	8	90058608	90095476	36868	-	127.703	36.1372	17.4708	21.2838	1.20519e-08	1.209e-06	3.58505	1.84199	3.58505	33.2837	9.28401	2.97259	4.32371
CALCOCO1	12	53708517	53727746	19229	-	73.0919	15.6566	11.7354	12.182	5.45635e-06	8.09658e-05	1.71897	0.781548	1.71897	15.4032	8.96072	1.48549	1.98916
CALM1	14	90396502	90408269	11767	+	3572.37	747.982	578.203	595.395	2.22677e-08	1.79375e-06	1.62158	0.697397	1.62158	736.563	454.226	1.50444	1.74784
CAMK1	3	9757347	9769993	12646	-	19.2085	4.77876	3.04635	3.20142	0.00209952	0.00764195	1.72719	0.788426	1.72719	4.05506	2.34778	1.27183	2.34558
CAMK2N1	1	20482391	20486211	3820	-	119.078	27.2345	18.8964	19.8463	2.88461e-06	5.01122e-05	1.84227	0.881486	1.84227	25.7275	13.9651	1.57845	2.15019
CAMK2N2	3	184259213	184261554	2341	-	22.8222	5.52382	3.66201	3.8037	0.00572851	0.0169451	1.57281	0.653345	1.57281	4.65056	2.95684	1.1697	2.11483
CAMTA2	17	4967992	4987676	19684	-	27.4809	6.26032	4.3844	4.58014	0.0183218	0.0434009	1.51205	0.596502	1.51205	5.51374	3.64654	1.07647	2.12388
CAPN1	11	65180566	65212007	31441	+	57.0094	15.0522	8.95057	9.50156	0.000613191	0.00289829	1.83723	0.877535	1.83723	12.3054	6.69776	1.39974	2.41147
CAPN5	11	77066961	77126156	59195	+	29.1415	7.50316	4.53305	4.85692	2.3643e-05	0.000242578	2.0658	1.0467	2.0658	6.54538	3.16846	1.64589	2.59282
CARNMT1	9	74980790	75028424	47634	-	88.6752	22.188	14.0342	14.7792	9.77945e-05	0.000701353	0.55452	-0.850689	-1.80336	10.5439	19.0145	-2.24141	-1.45093
CASC2	10	118046279	118210159	163880	+	12.3692	3.28928	1.92452	2.06153	0.00086308	0.00378854	1.98377	0.988242	1.98377	2.74123	1.38183	1.42218	2.76711
CASP3	4	184627696	184649510	21814	-	579.409	142.492	88.486	96.5682	1.85308e-09	4.38679e-07	2.32091	1.21469	2.32091	134.979	58.1577	2.09394	2.57248
CASP9	1	15490832	15526535	35703	-	16.5585	3.54449	2.68218	2.75976	0.00130065	0.00519993	1.59794	0.676215	1.59794	3.39494	2.12457	1.25513	2.03438
CASTOR2	7	74964705	75031529	66824	+	98.8242	23.1167	15.9286	16.4707	0.000330775	0.0017927	1.58914	0.668247	1.58914	20.2185	12.7229	1.30444	1.93599
CASZ1	1	10636604	10796651	160047	-	9.10285	2.01747	1.45883	1.51714	0.0164916	0.0398325	1.58104	0.660876	1.58104	1.85868	1.1756	1.09559	2.28159
CBSL	21	6444869	6468041	23172	-	82.3881	18.22	13.3508	13.7314	0.000859153	0.00377375	0.663459	-0.591921	-1.50725	10.9533	16.5094	-1.84611	-1.2306
CBX4	17	79833156	79839441	6285	-	94.892	21.5771	15.2859	15.8153	0.000153505	0.00100067	1.61297	0.689718	1.61297	19.5254	12.1053	1.33604	1.9473
CBX6	22	38861422	38872250	10828	-	175.008	38.5671	28.1614	29.168	4.43832e-06	7.00861e-05	0.597587	-0.742778	-1.6734	21.8209	36.5151	-1.91655	-1.46109
CCDC144B	17	18537800	18625618	87818	-	66.1245	14.2221	10.713	11.0208	0.00108142	0.00451833	0.66314	-0.592614	-1.50798	8.78856	13.2529	-1.86103	-1.2219
CCDC149	4	24806117	24980205	174088	-	11.8552	3.03815	1.80781	1.97587	0.000761106	0.00342635	2.14219	1.09909	2.14219	2.6941	1.25764	1.47376	3.11381
CCDC150	2	196639554	196763491	123937	+	18.0309	3.98433	2.9141	3.00516	0.00683632	0.0195842	0.65579	-0.608695	-1.52488	2.38044	3.62988	-2.03152	-1.14459
CCDC181	1	169394870	169460670	65800	-	58.4301	12.5456	9.47199	9.73836	7.9167e-05	0.00059484	0.633435	-0.658733	-1.5787	7.55293	11.9238	-1.86108	-1.33916
CCDC3	10	12896625	13099653	203028	-	626.342	141.771	99.8835	104.39	1.2788e-07	5.88639e-06	1.79881	0.847039	1.79881	134.184	74.5963	1.61509	2.00342
CCDC86	11	60842113	60851082	8969	+	59.2468	16.5111	8.95686	9.87446	7.06278e-06	9.65461e-05	0.427016	-1.22764	-2.34183	5.90961	13.8393	-2.96283	-1.85099
CCDC88C	14	91271323	91417845	146522	-	74.7121	15.8841	12.1124	12.452	7.49231e-05	0.000572844	0.637979	-0.64842	-1.56745	9.69991	15.2041	-1.84328	-1.33289
CCDC92	12	123918660	123972832	54172	-	47.8544	12.1063	7.57145	7.97574	0.000245944	0.00142848	1.80192	0.849538	1.80192	10.2584	5.69304	1.41799	2.28982
CCHCR1	6	31142439	31158239	15800	-	25.7638	6.20656	4.18232	4.29397	0.00392177	0.0124937	1.50377	0.58858	1.50377	5.15794	3.43001	1.18271	1.91197
CCKAR	4	26481396	26490485	9089	-	65.6679	15.7857	10.2708	10.9447	2.26308e-06	4.14991e-05	0.495201	-1.01391	-2.01938	7.2496	14.6397	-2.40039	-1.69885
CCM2	7	44999475	45076470	76995	+	35.206	8.14759	5.64134	5.86766	0.00432194	0.0135172	1.58867	0.667817	1.58867	7.20198	4.53335	1.20254	2.09877
CCNA1	13	36431520	36442871	11351	+	20.7135	5.3397	3.13018	3.45225	4.26409e-05	0.000376425	2.33911	1.22596	2.33911	4.83673	2.06776	1.75134	3.12415
CCND1	11	69641156	69654475	13319	+	5491.3	1183.49	885.774	915.216	1.25442e-07	5.81372e-06	1.65638	0.728034	1.65638	1141.36	689.07	1.50964	1.81738
CCNDBP1	15	43185118	43197178	12060	+	203.51	44.6014	32.9702	33.9184	2.16305e-06	4.01011e-05	1.59839	0.676623	1.59839	41.7296	26.1072	1.42573	1.79196
CCNG2	4	77157207	77433389	276182	+	301.685	71.2217	48.0875	50.2808	4.05811e-07	1.2596e-05	1.8005	0.848401	1.8005	64.6532	35.9084	1.59558	2.03175
CCSER1	4	90127535	91601914	1474379	+	42.1109	9.34139	6.78118	7.01849	0.000184289	0.00115462	1.64418	0.717364	1.64418	8.72834	5.30864	1.34672	2.00732
CCT4	2	61868085	61888672	20587	-	4711.47	981.405	768.737	785.245	1.09738e-07	5.27874e-06	0.663387	-0.592078	-1.50742	626.338	944.152	-1.62342	-1.39971
CCT7	2	73233420	73253022	19602	+	2866.31	629.916	464.575	477.718	7.74656e-07	1.92004e-05	0.631099	-0.664062	-1.58454	369.674	585.763	-1.75318	-1.43212
CD151	11	832887	839832	6945	+	27.0279	6.11596	4.36247	4.50465	0.00324396	0.0107599	1.55108	0.633274	1.55108	5.47774	3.53156	1.19913	2.00633
CD163L1	12	7346685	7479898	133213	-	48.0616	10.7368	7.76367	8.01026	6.03191e-05	0.000489087	1.63178	0.706446	1.63178	9.93319	6.08734	1.37568	1.93556
CD200	3	112332347	112362813	30466	+	80.5343	20.4379	12.5038	13.4224	3.86097e-07	1.21513e-05	2.11979	1.08392	2.11979	18.2401	8.60468	1.81868	2.47075
CD247	1	167430640	167518611	87971	-	7.49356	2.47601	1.07453	1.24893	0.000932324	0.00403184	0.37327	-1.42171	-2.67903	0.678944	1.81891	-4.35839	-1.64675
CD248	11	66314494	66317045	2551	-	42.4034	11.9682	6.67996	7.06723	0.00933831	0.02527	1.66499	0.735509	1.66499	8.83069	5.30376	1.189	2.33152
CD276	15	73683966	73714515	30549	+	250.068	55.6057	40.5814	41.678	7.29971e-05	0.000563531	1.53178	0.615209	1.53178	50.4321	32.9239	1.31643	1.78236
CD302	2	159768628	159798256	29628	-	31.0633	7.06193	4.97571	5.17722	0.0147362	0.0362724	0.661886	-0.595345	-1.51083	4.12391	6.23054	-2.08011	-1.09736
CD3EAP	19	45406209	45410767	4558	+	46.6503	11.372	7.20822	7.77505	1.96915e-06	3.74207e-05	0.461733	-1.11487	-2.16575	4.91197	10.6381	-2.61153	-1.79607
CD59	11	33703010	33736480	33470	-	432.141	90.6677	70.3139	72.0234	1.20803e-06	2.64108e-05	1.53901	0.622	1.53901	87.3133	56.7335	1.39351	1.6997
CD9	12	6199715	6238272	38557	+	144.608	36.2687	21.473	24.1013	6.20206e-09	7.99357e-07	2.64334	1.40236	2.64334	34.9723	13.2303	2.31287	3.02103
CD99L2	X	150766336	150898817	132481	-	105.566	23.7061	17.0626	17.5943	5.26716e-05	0.000441638	1.59857	0.676779	1.59857	21.647	13.5415	1.36126	1.87725
CDC42EP3	2	37641882	37738469	96587	-	1281.46	283.958	203.844	213.577	3.56094e-09	6.25846e-07	1.84535	0.883892	1.84535	277.03	150.124	1.70394	1.99849
CDC42EP4	17	73283624	73312006	28382	-	846.306	177.259	138.116	141.051	4.31388e-07	1.31934e-05	1.50149	0.58639	1.50149	169.328	112.774	1.38038	1.63322
CDC42P6	4	22727375	22727951	576	-	100.737	21.042	16.3227	16.7896	1.17694e-05	0.000142848	1.59365	0.672332	1.59365	20.6324	12.9467	1.39034	1.82669
CDH6	5	31193686	31329147	135461	+	35.0038	9.95535	4.83497	5.83397	6.17611e-08	3.71776e-06	3.49688	1.80607	3.49688	9.07327	2.59467	2.82195	4.33324
CDH7	18	65750252	65890338	140086	+	203.597	43.9474	33.1365	33.9328	1.81215e-05	0.000198583	0.658028	-0.60378	-1.51969	26.9341	40.9316	-1.72667	-1.33753
CDIPT	16	29858357	29863415	5058	-	56.7507	12.5205	9.22764	9.45845	0.00044761	0.00225942	1.51396	0.598328	1.51396	11.3922	7.52474	1.26249	1.81552
CDK5R2	2	218959666	218962156	2490	+	75.5288	18.5966	11.845	12.5881	1.13057e-05	0.000138713	1.95778	0.96922	1.95778	16.6644	8.51188	1.61412	2.37461
CDK6-AS1	7	92836483	92917188	80705	+	79.5144	17.9399	12.578	13.2524	8.25685e-07	2.01697e-05	1.90665	0.93104	1.90665	17.3861	9.11868	1.65304	2.19917
CDKN1C	11	2883213	2885774	2561	-	25.4292	5.92063	3.94204	4.23819	0.000126973	0.000863482	2.03866	1.02762	2.03866	5.68687	2.78952	1.54264	2.69418
CDKN2D	19	10566460	10569060	2600	-	14.5576	4.05083	2.25496	2.42627	0.000526655	0.00256283	2.03165	1.02265	2.03165	3.25191	1.60062	1.47536	2.7977
CDS2	20	5126879	5197888	71009	+	602.319	130.201	97.6929	100.387	5.65336e-07	1.56026e-05	1.58289	0.662559	1.58289	123.041	77.732	1.43559	1.74529
CDYL2	16	80597907	80804599	206692	-	59.1524	13.113	9.49362	9.85874	8.4842e-06	0.00011072	1.72611	0.787526	1.72611	12.4847	7.23282	1.48009	2.01303
CEBPB	20	50190830	50192669	1839	+	10.3446	2.38078	1.62576	1.7241	0.00121311	0.00492266	0.526628	-0.925145	-1.89887	1.1895	2.25871	-2.64971	-1.3608
CELF3	1	151700058	151716804	16746	-	169.414	44.3281	24.8708	28.2357	4.68131e-09	6.719e-07	2.772	1.47093	2.772	41.5002	14.9712	2.41888	3.17667
CELF5	19	3224661	3297077	72416	+	57.4818	14.0892	8.89833	9.5803	1.00961e-06	2.33158e-05	2.14886	1.10357	2.14886	13.0757	6.08493	1.80802	2.55396
CELF6	15	72284727	72320158	35431	-	35.6549	8.9462	5.35436	5.94248	4.33826e-06	6.8989e-05	2.4492	1.29231	2.4492	8.43925	3.44572	1.93141	3.1058
CEMIP	15	80779343	80951777	172434	+	12.8363	3.31434	1.79666	2.13938	1.47471e-05	0.00016956	3.19297	1.6749	3.19297	3.2583	1.02046	2.23785	4.55574
CEMIP2	9	71683366	71816691	133325	-	114.999	24.2369	18.6633	19.1665	6.72059e-05	0.000532266	1.54474	0.62736	1.54474	23.2693	15.0636	1.32205	1.80493
CEP19	3	196706277	196712251	5974	-	34.5988	7.38443	5.56532	5.76646	3.81132e-05	0.000348845	1.70502	0.769791	1.70502	7.2694	4.26352	1.42832	2.03533
CFLAR	2	201116154	201176688	60534	+	30.7988	7.48569	4.8942	5.13313	0.00015299	0.000998273	1.79568	0.844531	1.79568	6.59408	3.67219	1.42838	2.25743
CGNL1	15	57375967	57550728	174761	+	19.7083	4.66627	3.14295	3.28472	0.00123063	0.0049773	1.71921	0.781745	1.71921	4.15351	2.41594	1.30474	2.26535
CHKB	22	50578959	50601456	22497	-	13.2587	3.42055	2.12112	2.20978	0.00424127	0.0133049	1.67494	0.744113	1.67494	2.76735	1.65221	1.23345	2.27447
CHL1	3	196763	409418	212655	+	132.583	34.1637	18.7827	22.0971	1.05052e-09	3.59935e-07	3.20703	1.68124	3.20703	33.6894	10.5049	2.80112	3.67177
CHN2	7	29146569	29514329	367760	+	134.887	29.6027	21.592	22.4812	1.16108e-06	2.56746e-05	1.75389	0.810559	1.75389	28.6356	16.3269	1.5415	1.99555
CHODL	21	17901263	18267374	366111	+	18.8115	4.52339	2.98529	3.13525	0.000695943	0.0032002	0.559018	-0.839034	-1.78885	2.24842	4.02209	-2.35668	-1.35784
CHPT1	12	101696947	101744141	47194	+	180.704	40.315	28.9275	30.1174	2.00983e-07	8.07094e-06	0.566911	-0.818805	-1.76394	21.793	38.4417	-1.96698	-1.58187
CHRDL1	X	110673856	110795820	121964	-	73.913	17.0934	11.6718	12.3188	8.8672e-07	2.12389e-05	0.518895	-0.946485	-1.92717	8.41688	16.2208	-2.23061	-1.66501
CHRFAM7A	15	30360566	30393850	33284	-	10.53	2.55035	1.67564	1.755	0.00279607	0.0095433	1.75925	0.814962	1.75925	2.23792	1.27208	1.27482	2.42777
CHRM1	11	62908679	62921808	13129	-	10.7702	2.94609	1.58956	1.79504	0.000113673	0.000792143	2.58728	1.37143	2.58728	2.58929	1.00078	1.80843	3.70156
CHRM2	7	136868669	137020256	151587	+	245.524	57.0563	39.1251	40.9206	4.89571e-07	1.43097e-05	1.80398	0.851184	1.80398	52.6537	29.1875	1.59387	2.04179
CHRNA3	15	78593052	78621296	28244	-	6967.04	1476.27	1127.39	1161.17	1.15064e-08	1.17967e-06	1.62711	0.702315	1.62711	1438.35	883.991	1.51592	1.74646
CHRNA5	15	78565520	78595270	29750	+	1214.09	255.893	197.635	202.348	6.33394e-07	1.67757e-05	1.53177	0.615197	1.53177	244.849	159.847	1.39716	1.67935
CHST8	19	33621953	33773510	151557	+	14.66	3.86671	2.26033	2.44334	0.0122113	0.0312629	1.76203	0.817237	1.76203	3.11744	1.76923	1.12166	2.76799
CIAPIN1P	18	26599408	26600339	931	+	10.0727	2.20191	1.61423	1.67878	0.00418417	0.0131501	1.67957	0.748089	1.67957	2.10454	1.25303	1.21768	2.31665
CIART	1	150282543	150287094	4551	+	22.3141	5.58084	3.41924	3.71901	0.000167555	0.00106757	0.466854	-1.09896	-2.142	2.36729	5.07073	-2.90678	-1.57843
CIB2	15	78104606	78131536	26930	-	32.4613	7.91748	5.13385	5.41022	0.000655153	0.0030468	1.79428	0.843408	1.79428	6.94809	3.87235	1.37544	2.34066
CIDECP1	3	10014238	10026366	12128	-	13.3113	2.89947	2.11272	2.21855	0.00979536	0.0262029	1.62386	0.69943	1.62386	2.74605	1.69106	1.12435	2.3453
CKMT1A	15	43692886	43699223	6337	+	274.284	63.3645	42.7366	45.7141	5.04523e-09	6.96706e-07	0.47746	-1.06655	-2.09442	29.5462	61.8819	-2.31344	-1.89612
CKMT1B	15	43593054	43604902	11848	+	318.004	85.2865	48.0865	53.0006	2.60203e-07	9.54288e-06	0.41998	-1.25161	-2.38106	31.3515	74.6498	-2.82462	-2.00716
CLASP2	3	33496245	33718357	222112	-	855.333	185.642	137.603	142.555	1.12301e-08	1.16905e-06	1.7046	0.769431	1.7046	179.694	105.417	1.57771	1.84169
CLCN3P1	9	14921013	15146402	225389	-	46.4727	10.5044	7.4292	7.74545	2.19181e-05	0.000229758	1.76364	0.818559	1.76364	9.88566	5.60525	1.47728	2.10552
CLCN4	X	10156945	10237661	80716	+	175.203	36.5488	28.52	29.2006	8.26112e-06	0.000108753	1.52854	0.612153	1.52854	35.3043	23.0968	1.35631	1.72264
CLCN5	X	49922596	50099236	176640	+	302.103	66.3098	48.4137	50.3505	1.41115e-07	6.30266e-06	1.74611	0.804142	1.74611	64.0306	36.6705	1.57443	1.9365
CLDN10	13	95433604	95579760	146156	+	19.1738	3.99207	3.09435	3.19563	0.00350817	0.01144	0.639306	-0.64542	-1.5642	2.4925	3.89875	-2.05748	-1.18917
CLDN15	7	101232092	101238821	6729	-	9.96015	2.16873	1.60801	1.66003	0.010095	0.0268559	0.638298	-0.647697	-1.56667	1.29353	2.02652	-2.16889	-1.13166
CLEC2D	12	9664969	9699554	34585	+	84.7332	21.1481	13.3813	14.1222	5.23029e-05	0.000439091	0.541955	-0.883755	-1.84517	9.92714	18.3173	-2.27365	-1.49744
CLIP2	7	74289407	74405936	116529	+	28.7263	8.97615	4.20829	4.78771	0.000108335	0.000761213	2.54412	1.34717	2.54412	6.87364	2.70178	1.79347	3.60895
CLIP3	19	36014660	36033344	18684	-	245.18	68.4943	34.8006	40.8633	6.82761e-10	3.07993e-07	3.17663	1.6675	3.17663	62.1591	19.5676	2.79383	3.61188
CLSTN2	3	139935185	140577398	642213	+	117.633	29.9452	17.5916	19.6055	7.5063e-09	8.81723e-07	2.56762	1.36043	2.56762	28.2202	10.9908	2.25099	2.9288
CLSTN3	12	7129698	7158946	29248	+	36.2863	8.60761	5.80591	6.04772	7.87026e-05	0.00059303	1.74207	0.800802	1.74207	7.68438	4.41106	1.42911	2.12356
CLTB	5	176392455	176416570	24115	-	22.3116	5.06351	3.6235	3.71861	0.00221857	0.00795758	1.52751	0.611182	1.52751	4.49471	2.9425	1.20827	1.9311
CLU	8	27596917	27614701	17784	-	46.5004	14.1316	6.33659	7.75007	2.84464e-07	1.01041e-05	3.57836	1.8393	3.57836	12.1146	3.38552	2.77403	4.6159
CLUH	17	2689386	2712664	23278	-	36.6043	9.53198	5.71992	6.10071	0.00122132	0.00495001	0.546917	-0.870606	-1.82843	4.31385	7.88757	-2.50587	-1.33413
CLVS1	8	61057158	61501646	444488	+	135.211	29.3553	21.5161	22.5352	4.56782e-07	1.36762e-05	1.83107	0.872684	1.83107	29.1505	15.9199	1.6135	2.07797
CMC4	X	155061622	155071137	9515	-	16.0589	3.87535	2.55318	2.67649	0.00455925	0.0140547	1.67537	0.744483	1.67537	3.35214	2.00083	1.20452	2.33029
CNGB1	16	57882340	57971129	88789	-	13.7423	4.32702	1.78907	2.29038	1.33163e-06	2.82904e-05	4.18742	2.06606	4.18742	3.69771	0.883053	3.00189	5.84114
CNIH2	11	66278175	66285302	7127	+	34.2536	8.41934	5.4794	5.70894	0.000225828	0.00134513	1.7188	0.781403	1.7188	7.21828	4.1996	1.38177	2.13803
CNKSR3	6	154387515	154510686	123171	-	166.966	39.6853	25.6814	27.8276	7.90495e-09	9.14339e-07	2.24484	1.16662	2.24484	38.5033	17.1519	2.00393	2.51472
CNNM1	10	99329356	99394331	64975	+	170.665	41.0023	27.0142	28.4442	3.42799e-07	1.11316e-05	0.529151	-0.918249	-1.88982	19.6858	37.2026	-2.14885	-1.66201
CNR1	6	88139864	88166360	26496	-	154.729	38.1983	23.188	25.7881	2.34642e-09	5.02382e-07	2.54784	1.34928	2.54784	37.0389	14.5373	2.26656	2.86404
CNTN1	12	40692439	41072416	379977	+	908.549	213.663	141.478	151.425	3.43113e-10	1.78591e-07	2.10508	1.07387	2.10508	205.316	97.5338	1.94797	2.27485
CNTN2	1	205042937	205078290	35353	+	2133.57	520.749	329.529	355.595	1.33711e-08	1.27484e-06	2.17586	1.12159	2.17586	487.254	223.936	1.94012	2.44024
CNTN5	11	99020949	100358886	1337937	+	15.3627	4.07869	2.21757	2.56045	3.23533e-06	5.49911e-05	2.95357	1.56246	2.95357	3.82564	1.29526	2.23957	3.8952
COBLL1	2	164653624	164843680	190056	-	41.0996	9.66565	6.64127	6.84993	0.000350025	0.00187451	0.625965	-0.675847	-1.59753	5.27418	8.42568	-1.95014	-1.30868
COL14A1	8	120059780	120373574	313794	+	20.8096	4.42816	3.37502	3.46826	0.000772208	0.00346265	0.631507	-0.663129	-1.58351	2.68492	4.25161	-1.97364	-1.2705
COL1A1	17	50184101	50201633	17532	-	18.1343	4.66627	2.88555	3.02238	0.000760388	0.0034244	1.77007	0.823804	1.77007	3.86259	2.18217	1.35354	2.31477
COL4A1	13	110148963	110307158	158195	-	78.2753	20.712	11.8365	13.0459	9.13339e-08	4.62641e-06	0.411976	-1.27937	-2.42732	7.61287	18.4789	-2.83947	-2.075
COL5A1	9	134641803	134844844	203041	+	196.625	46.2608	30.5306	32.7709	1.26043e-08	1.24507e-06	2.13249	1.09254	2.13249	44.6186	20.9232	1.90841	2.38287
COL6A1	21	45981769	46005051	23282	+	83.5681	20.8522	12.8699	13.928	1.04536e-06	2.38968e-05	2.18989	1.13086	2.18989	19.1234	8.73259	1.83505	2.61335
COL6A2	21	46098112	46132849	34737	+	14.9285	4.18892	2.29409	2.48808	0.000438963	0.00222106	2.1039	1.07307	2.1039	3.37296	1.60319	1.5127	2.92616
COL6A6	3	130560334	130678156	117822	+	13.2637	3.13021	2.0593	2.21061	0.000154485	0.00100471	2.08569	1.06052	2.08569	2.98841	1.43282	1.56109	2.78657
COLGALT2	1	183929854	184037730	107876	-	39.9673	8.47288	6.49423	6.66121	0.000289299	0.00161914	0.647163	-0.627799	-1.54521	5.23432	8.0881	-1.85616	-1.28635
COQ8A	1	226897536	226987546	90010	+	132.282	29.5541	21.4266	22.0471	1.33071e-05	0.00015728	0.628999	-0.668871	-1.58983	17.0259	27.0682	-1.82205	-1.38721
CORO1A	16	30182827	30189077	6250	+	9.02976	2.61363	1.35907	1.50496	0.00359564	0.0116439	2.18659	1.12868	2.18659	2.06536	0.944559	1.40156	3.41132
CORO2A	9	98120975	98192638	71663	-	74.75	16.2951	11.987	12.4583	3.15075e-06	5.38373e-05	1.73995	0.799043	1.73995	15.8228	9.09385	1.51204	2.00221
CPEB2	4	15002674	15070154	67480	+	40.6184	10.3939	6.29777	6.76974	1.76481e-05	0.000194542	2.08646	1.06106	2.08646	9.15275	4.38673	1.66976	2.60716
CPEB3	10	92046692	92291079	244387	-	40.2841	9.2098	6.39466	6.71402	2.41003e-05	0.000245965	1.84143	0.880826	1.84143	8.70224	4.72581	1.51723	2.2349
CPLX3	15	74826627	74831803	5176	+	11.8851	2.76416	1.89529	1.98084	0.00247503	0.00870374	0.576664	-0.794198	-1.73411	1.44899	2.5127	-2.36286	-1.27267
CPNE2	16	57092583	57148370	55787	+	71.3124	16.203	11.472	11.8854	0.000305823	0.00168446	1.61602	0.692446	1.61602	14.6842	9.08662	1.3164	1.98383
CPPED1	16	12659799	12803888	144089	-	80.021	16.8474	12.9602	13.3368	8.01485e-05	0.000600914	1.57427	0.654682	1.57427	16.312	10.3616	1.33364	1.85832
CPT1C	19	49690898	49713732	22834	+	69.4065	17.676	11.0064	11.5677	7.45678e-05	0.000571296	1.80125	0.849001	1.80125	14.8765	8.25898	1.46266	2.21822
CRACR2A	12	3606633	3764820	158187	-	18.507	4.48866	2.98836	3.0845	0.00271411	0.00932842	0.630312	-0.665861	-1.58651	2.38506	3.78394	-2.05804	-1.22302
CRAT	9	129094794	129111190	16396	-	17.8311	4.51114	2.77324	2.97186	0.000426874	0.00217772	2.00023	1.00017	2.00023	3.96263	1.98109	1.48079	2.70188
CREB5	7	28299321	28825895	526574	+	126.497	32.7604	18.3605	21.0828	1.50561e-09	3.89655e-07	2.92146	1.54669	2.92146	31.4131	10.7525	2.56972	3.32135
CRTC1	19	18683678	18782334	98656	+	14.1268	3.08418	2.27672	2.35447	0.00164879	0.00629039	1.65018	0.722624	1.65018	2.9321	1.77684	1.26509	2.15249
CRTC2	1	153947669	153958616	10947	-	38.7333	8.746	6.2734	6.45555	0.00305806	0.0102641	1.51196	0.596417	1.51196	7.77125	5.13986	1.19618	1.91109
CRYL1	13	20403666	20525874	122208	-	8.88023	2.40114	1.37017	1.48004	0.00643628	0.0186155	1.89696	0.923686	1.89696	1.93829	1.02179	1.22502	2.93746
CSPG4P10	15	82459472	82477259	17787	+	7.56133	1.66674	1.19035	1.26022	0.0211991	0.048782	1.64193	0.715389	1.64193	1.56642	0.954017	1.05135	2.56424
CSPG4P12	15	85191438	85213906	22468	+	14.4591	3.54378	2.28283	2.40985	0.00520596	0.0156665	1.72607	0.787492	1.72607	3.0517	1.76801	1.21164	2.45892
CSRNP2	12	51061205	51083665	22460	-	611.21	126.984	99.4904	101.868	1.2332e-07	5.7747e-06	1.5447	0.627327	1.5447	123.673	80.0631	1.42661	1.67256
CSRNP3	2	165469647	165689408	219761	+	368.894	79.0274	59.9	61.4824	4.64117e-06	7.21941e-05	1.55516	0.637064	1.55516	74.8407	48.1241	1.38322	1.74847
CTNNA2	2	79185231	80648862	1463631	+	250.829	59.7314	38.5034	41.8048	1.46979e-09	3.89655e-07	2.27205	1.18399	2.27205	58.057	25.5527	2.05964	2.50637
CTNNAL1	9	108942569	109013523	70954	-	328.825	73.3979	52.6332	54.8042	3.3714e-08	2.37298e-06	0.565463	-0.822496	-1.76846	39.5918	70.0166	-1.93858	-1.61327
CTNNBIP1	1	9848276	9910337	62061	-	38.3743	9.52852	6.04156	6.39572	0.000112909	0.000788037	1.88399	0.913789	1.88399	8.35611	4.43533	1.48704	2.38689
CTSC	11	88293592	88337762	44170	-	459.483	96.608	74.0576	76.5805	1.99661e-08	1.67827e-06	0.594229	-0.750908	-1.68285	57.0889	96.0722	-1.82264	-1.55379
CTSF	11	66563464	66568842	5378	-	20.6003	4.571	3.29967	3.43339	0.00189119	0.00704085	0.606171	-0.722202	-1.6497	2.59153	4.27524	-2.18063	-1.24804
CTSK	1	150796208	150808261	12053	-	6.77537	1.66662	1.07926	1.12923	0.019276	0.0452035	1.65879	0.730129	1.65879	1.40903	0.849431	1.10826	2.4828
CTSO	4	155924118	155953867	29749	-	18.2604	4.39446	2.91247	3.04339	0.000250323	0.00144585	1.79167	0.841305	1.79167	3.90645	2.18034	1.40975	2.27705
CU633906.7	21	6215291	6217682	2391	-	8.68537	2.21916	1.37862	1.44756	0.0051857	0.0156159	0.569238	-0.812897	-1.75674	1.0502	1.84492	-2.50799	-1.23051
CUL4A	13	113208193	113267109	58916	+	402.68	93.7986	63.2399	67.1133	6.9145e-09	8.50672e-07	0.500432	-0.998753	-1.99827	44.768	89.4587	-2.19943	-1.81551
CXXC4	4	104468308	104494902	26594	-	21.3817	4.95191	3.43721	3.56362	0.000469495	0.00233556	0.594852	-0.749397	-1.68109	2.65834	4.46891	-2.11992	-1.3331
CYB5D2	17	4143168	4187311	44143	+	15.9798	4.32702	2.47155	2.66331	0.00250076	0.0087653	1.93932	0.955551	1.93932	3.51442	1.81219	1.34466	2.79696
CYGB	17	76527356	76551176	23820	-	10.2344	2.39371	1.65561	1.70574	0.0175585	0.04196	1.5312	0.61466	1.5312	2.0637	1.34777	1.10467	2.12241
CYLD	16	50742050	50801936	59886	+	313.73	68.8978	50.7736	52.2883	7.78991e-07	1.92726e-05	1.61401	0.690647	1.61401	64.5704	40.0063	1.4531	1.79273
CYRIA	2	16549459	16666332	116873	-	107.236	25.0417	16.5588	17.8727	2.12505e-08	1.74293e-06	2.20338	1.13972	2.20338	24.5867	11.1586	1.95054	2.48901
CYTH2	19	48469208	48482315	13107	+	105.668	23.6601	17.1571	17.6114	2.10067e-05	0.00022175	1.56113	0.642595	1.56113	21.47	13.7528	1.36053	1.79131
CYTH3	7	6161776	6272645	110869	-	341.813	77.3771	53.975	56.9688	8.60042e-09	9.57422e-07	1.93555	0.952742	1.93555	75.1246	38.8131	1.7629	2.1251
CYYR1	21	26466209	26573287	107078	-	212.803	54.8257	31.7619	35.4671	2.55149e-09	5.14204e-07	0.386455	-1.37163	-2.58762	19.7719	51.1624	-2.91588	-2.29632
DAAM1	14	59188646	59371406	182760	+	285.653	64.5558	45.9202	47.6088	1.07323e-06	2.42761e-05	1.69298	0.759564	1.69298	59.8598	35.3577	1.50202	1.90821
DAAM2	6	39792298	39904878	112580	+	37.3554	9.49247	5.78215	6.22591	9.81559e-06	0.000124377	0.471232	-1.08549	-2.12209	3.98829	8.46352	-2.63229	-1.71078
DACT3	19	46647551	46661183	13632	-	96.6986	25.9131	13.2923	16.1164	5.04463e-10	2.43818e-07	3.59156	1.84461	3.59156	25.2128	7.02003	3.12747	4.12452
DAPK3	19	3958453	3971124	12671	-	16.1212	3.98674	2.58101	2.68686	0.0125979	0.0320525	1.59206	0.670892	1.59206	3.30057	2.07315	1.15002	2.20401
DAZAP2	12	51238724	51271363	32639	+	1106.24	231.828	178.665	184.373	1.04426e-08	1.11275e-06	0.604444	-0.726318	-1.65441	138.918	229.827	-1.7789	-1.53864
DBF4	7	87876216	87909554	33338	+	536.786	117.11	87.1559	89.4644	1.59958e-05	0.000181451	0.649283	-0.623081	-1.54016	70.4399	108.489	-1.75328	-1.35294
DBF4P1	10	64168959	64170851	1892	-	125.467	27.9445	20.3734	20.9112	1.38185e-05	0.000161359	0.640476	-0.642783	-1.56134	16.3284	25.4941	-1.78038	-1.36924
DBNDD1	16	90004871	90020129	15258	-	22.651	5.20161	3.64	3.77516	0.00371441	0.0119428	1.59177	0.670631	1.59177	4.63713	2.91319	1.20446	2.10362
DBNDD2	20	45406057	45410611	4554	+	19.9193	4.33734	3.22062	3.31988	0.00285339	0.00969739	0.641086	-0.641411	-1.55985	2.5938	4.04596	-2.02353	-1.20242
DBX2	12	45014672	45051100	36428	-	9.65336	2.01747	1.57412	1.60889	0.0101549	0.0269833	1.51112	0.595614	1.51112	1.93637	1.28142	1.12776	2.02478
DCAF13P1	7	106125371	106126701	1330	+	6.56676	1.3829	1.05212	1.09446	0.0192765	0.0452035	0.623882	-0.680656	-1.60287	0.840965	1.34796	-2.3851	-1.07718
DCAF4	14	72926377	72959704	33327	+	68.1905	16.4413	10.7531	11.3651	4.57606e-06	7.14276e-05	0.520959	-0.940759	-1.91954	7.78553	14.9446	-2.2796	-1.61635
DCBLD1	6	117453817	117569859	116042	+	18.9353	4.52339	3.05724	3.15589	0.00240119	0.00849551	0.627374	-0.672603	-1.59395	2.43327	3.8785	-2.05966	-1.23354
DCC	18	52340197	53535904	1195707	+	295.385	77.2738	42.4572	49.2309	1.18347e-10	9.99401e-08	3.04026	1.6042	3.04026	74.0916	24.3701	2.73732	3.37673
DCLK2	4	150078445	150257439	178994	+	66.585	13.9015	10.8651	11.0975	6.15641e-05	0.000497296	1.50325	0.588086	1.50325	13.3285	8.86647	1.30345	1.73368
DCP1A	3	53283429	53347587	64158	-	493.313	102.998	80.077	82.2189	9.68855e-08	4.78522e-06	0.631244	-0.66373	-1.58417	63.6327	100.805	-1.71989	-1.45916
DCTN1	2	74361154	74392088	30934	-	808.045	185.959	129.706	134.674	8.03888e-06	0.000106448	1.68092	0.749251	1.68092	168.88	100.469	1.45541	1.94137
DCX	X	111293779	111412430	118651	-	2133.84	506.975	326.06	355.641	4.43741e-11	7.54772e-08	2.32676	1.21832	2.32676	497.475	213.806	2.16358	2.50225
DDAH2	6	31727038	31730618	3580	-	81.2206	22.5093	12.3609	13.5368	5.06076e-06	7.6602e-05	2.27476	1.18572	2.27476	18.8062	8.26732	1.82943	2.8285
DDC	7	50458436	50565406	106970	-	102.737	22.8775	16.6402	17.1229	1.24247e-05	0.000149861	1.59757	0.675882	1.59757	21.062	13.1837	1.39313	1.83202
DDN	12	48995149	48999376	4227	-	59.5585	16.29	8.45463	9.92641	1.27606e-06	2.74539e-05	0.328689	-1.60521	-3.04239	4.91116	14.9417	-3.94693	-2.34515
DDR1	6	30876421	30900157	23736	+	139.073	35.5821	21.9065	23.1788	2.24223e-05	0.000233237	1.88227	0.912477	1.88227	30.2739	16.0837	1.54945	2.28659
DDX10	11	108665069	108940928	275859	+	529.019	120.576	84.3953	88.1698	3.2199e-08	2.30555e-06	0.554165	-0.851613	-1.80452	62.877	113.463	-1.98357	-1.64163
DDX21	10	68956170	68985069	28899	+	3133.97	686.362	501.418	522.328	4.35353e-09	6.54625e-07	0.56398	-0.826283	-1.77311	376.709	667.947	-1.91289	-1.64354
DDX31	9	132592997	132670402	77405	-	123.326	27.1079	19.6062	20.5543	2.97178e-07	1.03386e-05	0.54099	-0.886325	-1.84846	14.4319	26.6767	-2.09013	-1.63474
DDX58	9	32455302	32526209	70907	-	17.978	3.99098	2.90151	2.99634	0.00134287	0.0053356	1.62102	0.696899	1.62102	3.70628	2.28639	1.26345	2.07978
DENND11	7	141656728	141702167	45439	-	417.475	89.4183	67.4666	69.5791	7.03714e-08	4.00141e-06	0.608209	-0.717361	-1.64417	52.6283	86.53	-1.79198	-1.50856
DENND2A	7	140518420	140673994	155574	-	90.9331	23.0591	13.7657	15.1555	4.59883e-06	7.17004e-05	2.32602	1.21786	2.32602	21.1977	9.11331	1.85815	2.91169
DENND5B	12	31382226	31591137	208911	-	818.564	174.508	131.627	136.427	1.10179e-08	1.15585e-06	1.71069	0.77458	1.71069	172.196	100.659	1.5827	1.84904
DEPDC1B	5	60596912	60700191	103279	-	308.773	63.8976	50.3123	51.4622	1.28087e-05	0.000153535	0.665459	-0.587577	-1.50272	41.125	61.7994	-1.69566	-1.33173
DFFA	1	10456522	10472530	16008	-	442.347	96.4286	70.666	73.7245	3.93526e-08	2.63643e-06	0.559247	-0.838443	-1.78812	52.8848	94.5642	-1.96685	-1.62563
DGCR2	22	19036282	19122455	86173	-	92.2891	21.5886	14.9421	15.3815	0.00124117	0.00501546	1.51403	0.598397	1.51403	18.5265	12.2365	1.2317	1.86109
DGKI	7	137381037	137847093	466056	-	411.946	99.7114	62.8387	68.6576	1.05012e-09	3.59935e-07	2.33992	1.22646	2.33992	96.2019	41.1133	2.12059	2.58193
DHODH	16	72008588	72027665	19077	+	11.5058	2.63421	1.86586	1.91764	0.0069409	0.0198227	0.64461	-0.633501	-1.55132	1.50325	2.33203	-2.07471	-1.15997
DHRS12	13	51767993	51804163	36170	-	13.9252	3.12998	2.19568	2.32086	0.000210285	0.00127996	1.92897	0.94783	1.92897	3.05696	1.58477	1.4757	2.52146
DHRS2	14	23630115	23645640	15525	+	28.6797	8.01867	4.37306	4.77995	1.44358e-05	0.000166832	2.2786	1.18815	2.2786	6.64405	2.91585	1.7871	2.90526
DHX33	17	5440917	5468983	28066	-	589.625	124.924	95.8307	98.2708	1.44532e-07	6.37118e-06	0.639204	-0.645651	-1.56445	76.641	119.901	-1.70001	-1.43969
DHX37	12	124946825	124989132	42307	-	59.2761	13.4658	9.47888	9.87935	0.00251853	0.00880931	0.629139	-0.668548	-1.58947	7.6304	12.1283	-2.08729	-1.21039
DIMT1	5	62347284	62403940	56656	-	216.315	49.831	34.1502	36.0525	1.95381e-07	7.98817e-06	0.520561	-0.941861	-1.921	24.685	47.42	-2.17718	-1.69497
DIRAS3	1	68045886	68051632	5746	-	94.1159	23.2436	14.0932	15.686	1.09074e-06	2.44792e-05	2.47566	1.30781	2.47566	22.3458	9.0262	2.00786	3.05245
DKC1	X	154762742	154777690	14948	+	999.212	228.369	160.14	166.535	6.50511e-08	3.81098e-06	0.574056	-0.800737	-1.74199	121.47	211.6	-1.91606	-1.58374
DKK1	10	52314281	52318043	3762	+	234.623	50.3462	37.975	39.1039	8.31099e-07	2.0254e-05	1.61624	0.692644	1.61624	48.3146	29.8932	1.45385	1.79677
DKK3	11	11956207	12009770	53563	-	143.648	34.263	21.9609	23.9414	5.33534e-09	7.29325e-07	2.31922	1.21364	2.31922	33.4569	14.4259	2.07013	2.59828
DLEU1	13	50082169	50906857	824688	+	104.138	25.3143	16.1117	17.3564	2.61159e-07	9.54863e-06	0.46406	-1.10762	-2.15489	11.0028	23.7099	-2.50685	-1.85235
DLG2	11	83455012	85627923	2172911	-	8.60992	2.40114	1.20208	1.43499	7.44775e-05	0.000571296	3.1649	1.66216	3.1649	2.18089	0.689086	2.07375	4.83017
DLGAP2	8	737596	1708475	970879	+	8.88945	2.01747	1.43257	1.48157	0.00954033	0.0256883	1.6109	0.687867	1.6109	1.82823	1.13491	1.15625	2.24433
DMD	X	31097677	33339442	2241765	-	11.1067	2.28555	1.77989	1.85112	0.013647	0.0341693	0.637732	-0.648977	-1.56806	1.44165	2.26059	-2.24443	-1.09551
DMPK	19	45769709	45782553	12844	-	11.9301	2.89947	1.91159	1.98835	0.0152782	0.0373416	1.58867	0.667819	1.58867	2.44051	1.5362	1.12669	2.24008
DNAAF5	7	726699	786476	59777	+	203.035	46.6104	31.7942	33.8392	9.90782e-09	1.06415e-06	0.490782	-1.02684	-2.03756	22.2805	45.398	-2.2565	-1.83987
DNAH10OS	12	123925461	123934985	9524	-	36.6745	8.95734	5.67495	6.11242	1.81224e-05	0.000198583	2.10538	1.07408	2.10538	8.28817	3.93666	1.6735	2.64871
DNAJA1P3	X	107351650	107352844	1194	-	12.2362	2.71407	1.98104	2.03937	0.0104539	0.0276153	0.651142	-0.618957	-1.53576	1.60848	2.47025	-2.07757	-1.13525
DNAJB2	2	219279267	219286901	7634	+	29.8218	6.93141	4.82194	4.9703	0.000669207	0.00309938	1.59003	0.669056	1.59003	6.10258	3.83802	1.28091	1.97375
DNAJB5	9	34989641	34998901	9260	+	151.439	35.0296	24.2674	25.2398	1.68361e-06	3.32132e-05	1.73545	0.795314	1.73545	32.0257	18.4538	1.52263	1.97803
DNAJC12	10	67796669	67838189	41520	-	271.817	57.7552	43.9547	45.3028	1.73063e-07	7.29078e-06	0.611231	-0.710212	-1.63604	34.3718	56.2338	-1.79572	-1.49057
DNAJC2	7	103312289	103344831	32542	-	390.203	83.1133	63.3178	65.0338	6.7876e-07	1.76308e-05	0.633116	-0.659458	-1.57949	50.4238	79.6438	-1.74357	-1.43085
DNAJC4	11	64230278	64234287	4009	+	6.86559	1.84134	1.07203	1.14427	0.00695509	0.0198572	1.86885	0.902148	1.86885	1.49081	0.797718	1.22741	2.84549
DNASE1L1	X	154401236	154412113	10877	-	20.158	4.75854	3.23054	3.35966	0.000997715	0.00424861	1.68219	0.750342	1.68219	4.21416	2.50516	1.29848	2.17929
DNER	2	229357629	229714556	356927	-	19.0997	4.46511	2.99831	3.18329	0.000326338	0.00177648	1.91259	0.935531	1.91259	4.1807	2.18588	1.44317	2.5347
DNM3	1	171841498	172418467	576969	+	52.0665	11.9682	8.25808	8.67776	4.23364e-06	6.78837e-05	1.87138	0.904103	1.87138	11.3112	6.04431	1.58827	2.20496
DOC2A	16	30005514	30023271	17757	-	10.4841	2.39746	1.6818	1.74735	0.00377325	0.0120917	0.597162	-0.743805	-1.67459	1.30663	2.18807	-2.29076	-1.22415
DOC2B	17	142789	181651	38862	-	170.627	47.5962	25.0249	28.4379	3.50514e-07	1.12941e-05	2.71288	1.43982	2.71288	41.5573	15.3185	2.21729	3.31922
DOK4	16	57471922	57487328	15406	-	45.7435	10.8174	7.32749	7.62392	0.000537937	0.00261115	1.65619	0.727868	1.65619	9.50735	5.7405	1.31224	2.09029
DOK6	18	69400888	69849088	448200	+	158.04	33.9006	25.6074	26.34	7.64751e-06	0.000102582	1.58822	0.667413	1.58822	32.3263	20.3538	1.39639	1.80641
DPF3	14	72619296	72894117	274821	-	87.4529	19.0774	14.0996	14.5755	3.1479e-06	5.38373e-05	1.67294	0.742387	1.67294	18.245	10.9059	1.46849	1.90586
DPH2	1	43970000	43973370	3370	+	51.6024	12.0537	8.14228	8.60039	2.66387e-06	4.66971e-05	0.516686	-0.952639	-1.93541	5.85976	11.341	-2.2809	-1.64225
DPP6	7	153887097	154894286	1007189	+	83.424	18.9649	13.137	13.904	4.41778e-07	1.34049e-05	1.96236	0.972589	1.96236	18.4209	9.38712	1.7058	2.25751
DPY19L1	7	34928876	35038272	109396	-	320.44	70.4256	51.3931	53.4067	4.534e-07	1.3605e-05	0.579164	-0.787957	-1.72663	39.1742	67.6392	-1.9351	-1.54061
DPYSL2	8	26514031	26658179	144148	+	2007.04	418.215	327.347	334.506	2.48435e-07	9.27966e-06	1.50969	0.594255	1.50969	402.441	266.572	1.39255	1.63669
DPYSL3	5	147390808	147510069	119261	-	1120.18	249.396	178.4	186.697	2.18469e-08	1.78105e-06	1.82295	0.866275	1.82295	241.123	132.271	1.66105	2.00063
DPYSL4	10	132186948	132205760	18812	+	94.7447	22.7395	15.2823	15.7908	0.00061833	0.00291766	1.56585	0.646948	1.56585	19.2732	12.3084	1.2745	1.9238
DRAXIN	1	11691710	11725858	34148	+	175.952	46.5835	24.7957	29.3254	1.08591e-09	3.59935e-07	3.26236	1.70591	3.26236	44.8906	13.7602	2.84274	3.74392
DRC3	17	17972813	18016890	44077	+	10.9948	2.71826	1.75869	1.83247	0.00623109	0.0181306	1.65891	0.730237	1.65891	2.28658	1.37836	1.1912	2.31027
DSTNP2	12	6884682	6885787	1105	+	29.4309	6.49076	4.77147	4.90514	0.000653496	0.00304248	1.56365	0.644917	1.56365	5.9836	3.82669	1.26757	1.92888
DTNA	18	34493290	34891845	398555	+	83.299	20.0239	12.6338	13.8832	2.73621e-08	2.03287e-06	2.40752	1.26755	2.40752	19.6178	8.14855	2.0951	2.76651
DTX1	12	113056709	113098029	41320	+	69.3091	16.8475	11.1548	11.5515	0.000376935	0.00197792	1.61236	0.689174	1.61236	14.2593	8.84374	1.31374	1.97886
DUS3L	19	5784832	5791226	6394	-	10.1743	2.32003	1.63032	1.69572	0.0178619	0.0425713	0.641524	-0.640426	-1.55879	1.32541	2.06603	-2.25057	-1.07965
DUSP10	1	221701424	221742090	40666	-	52.921	15.0062	7.52762	8.82017	5.45572e-08	3.34082e-06	3.13218	1.64717	3.13218	13.3713	4.26902	2.58305	3.79804
DUSP16	12	12473282	12562864	89582	-	471.595	103.153	74.9038	78.5992	2.63598e-08	1.99726e-06	1.85805	0.893793	1.85805	102.196	55.0019	1.68488	2.04903
DUSP6	12	89347235	89352502	5267	-	40.4574	8.94669	6.50141	6.74291	0.00337499	0.0111074	1.54882	0.631174	1.54882	8.19482	5.29099	1.18571	2.02314
DUSP8	11	1554051	1572272	18221	-	23.455	6.66619	2.90278	3.90916	8.87822e-08	4.5511e-06	4.92704	2.30072	4.92704	6.49923	1.31909	3.70316	6.55541
DUXAP9	14	19062316	19131168	68852	+	152.207	32.8296	24.5489	25.3678	7.19193e-06	9.80144e-05	0.608498	-0.716676	-1.64339	19.1934	31.5423	-1.8867	-1.43146
DYRK1B	19	39825350	39834202	8852	-	11.8417	3.68258	1.74314	1.97361	0.000266008	0.00151766	2.55622	1.35401	2.55622	2.83727	1.10995	1.75251	3.7285
E2F5	8	85177154	85217159	40005	+	148.649	32.6521	23.9828	24.7748	2.06351e-06	3.88935e-05	0.6042	-0.726902	-1.65508	18.6622	30.8874	-1.86968	-1.46511
E2F7	12	77021248	77065570	44322	-	290.807	63.5173	47.0411	48.4678	7.09198e-07	1.80294e-05	0.616796	-0.697134	-1.62128	36.9802	59.9553	-1.80118	-1.45935
EARS2	16	23520754	23557732	36978	-	235.657	50.2317	38.1475	39.2761	2.57878e-06	4.56191e-05	0.623482	-0.68158	-1.6039	30.1672	48.385	-1.80402	-1.42597
EBF3	10	129835283	129973054	137771	-	1980.53	441.402	321.307	330.088	1.41787e-06	2.92948e-05	1.5686	0.64948	1.5686	403.158	257.017	1.4123	1.7422
EBNA1BP2	1	43164175	43270937	106762	-	126.967	27.0324	20.5603	21.1611	5.41503e-05	0.000450512	0.636546	-0.651663	-1.57098	16.4615	25.8607	-1.83941	-1.34172
ECE1	1	21217247	21345573	128326	-	72.364	16.111	11.6933	12.0607	0.000139015	0.000924015	1.592	0.670836	1.592	14.8152	9.30609	1.3305	1.90489
EEF1A2	20	63488014	63499186	11172	-	83.7472	23.0156	12.9782	13.9579	0.000348044	0.0018664	1.96241	0.972627	1.96241	18.4924	9.42331	1.48106	2.60021
EEF1AKMT3	12	57771492	57782542	11050	+	20.1828	4.84169	3.18763	3.36381	0.00846973	0.0232638	0.607263	-0.719606	-1.64673	2.54186	4.18576	-2.36219	-1.14797
EEF1AKMT4	3	184249672	184258760	9088	+	10.2729	2.51862	1.57279	1.71214	0.000324715	0.00177121	0.454126	-1.13884	-2.20203	1.06941	2.35488	-3.09708	-1.56565
EEF1G	11	62559596	62574087	14491	-	2660.09	561.382	431.951	443.348	1.24412e-05	0.000149926	0.651162	-0.618911	-1.53572	349.683	537.014	-1.74288	-1.35318
EEF2K	16	22206278	22288739	82461	+	181.349	39.4241	29.2261	30.2248	3.4787e-07	1.12625e-05	0.595346	-0.748199	-1.67969	22.5584	37.8913	-1.86567	-1.51226
EFCAB2	1	244969705	245127165	157460	+	30.2349	7.66972	4.75815	5.03916	0.00067961	0.00313575	1.83157	0.87308	1.83157	6.51905	3.55927	1.38222	2.427
EFNA2	19	1285873	1301432	15559	+	43.8686	9.47295	7.08353	7.31143	0.000280462	0.00158146	1.60338	0.681119	1.60338	9.00599	5.61687	1.31335	1.95747
EFNB3	17	7705202	7711373	6171	+	140.215	32.6361	22.4719	23.3692	6.41143e-06	8.99128e-05	1.71855	0.781195	1.71855	29.546	17.1923	1.48224	1.99254
EFR3B	2	25042076	25159136	117060	+	222.959	51.3734	35.3832	37.1599	4.20408e-07	1.29011e-05	1.85495	0.891378	1.85495	48.2879	26.0319	1.63371	2.10615
EGLN3	14	33924227	34462775	538548	-	16.6794	3.83303	2.68964	2.7799	0.00504648	0.0152783	0.638234	-0.647844	-1.56682	2.16602	3.39378	-2.08666	-1.17649
ELAC1	18	50967991	50988122	20131	+	43.5858	9.62058	6.96229	7.2643	4.9918e-05	0.000423536	1.75496	0.811439	1.75496	9.25498	5.27361	1.44541	2.1308
ELAVL3	19	11451326	11481047	29721	-	665.642	144.169	107.754	110.94	4.43069e-07	1.34114e-05	1.60831	0.685549	1.60831	136.814	85.0666	1.45695	1.7754
ELAVL4	1	50024029	50203773	179744	+	3327.6	746.47	538.848	554.6	5.12667e-06	7.73458e-05	1.57916	0.659161	1.57916	679.138	430.062	1.39779	1.78407
ELFN1	7	1688119	1747955	59836	+	10.4014	3.13021	1.54932	1.73356	0.000185167	0.00115798	2.47714	1.30868	2.47714	2.47	0.997119	1.73078	3.54535
ELK3	12	96194375	96269825	75450	+	349.096	77.5593	56.3027	58.1827	9.44401e-07	2.20662e-05	0.604869	-0.725305	-1.65325	43.8577	72.5077	-1.85024	-1.47723
ELMOD1	11	107591091	107666780	75689	+	17.4883	4.33293	2.74114	2.91472	0.000175704	0.00110956	0.509376	-0.973196	-1.96319	1.96729	3.86215	-2.56849	-1.50053
ELN	7	74027789	74069908	42119	+	13.6	3.95877	1.90844	2.26667	2.74539e-05	0.000270994	3.1258	1.64423	3.1258	3.43456	1.09878	2.16589	4.51115
EML2	19	45606994	45645630	38636	-	13.5364	3.08418	2.1692	2.25606	0.00398184	0.0126493	1.64764	0.720399	1.64764	2.80792	1.70421	1.21338	2.23732
ENO1	1	8861000	8879191	18191	-	1989.82	438.865	322.437	331.637	1.34624e-05	0.000158837	0.640934	-0.641751	-1.56022	259.069	404.206	-1.78102	-1.3668
ENO1P1	1	236483165	236484469	1304	+	26.1847	5.93889	4.16534	4.36412	0.000116672	0.00080875	0.553457	-0.853457	-1.80683	3.10965	5.61859	-2.26227	-1.44307
ENO2	12	6913745	6923699	9954	+	425.014	94.317	68.2102	70.8356	2.06588e-07	8.23108e-06	1.72303	0.784946	1.72303	89.6442	52.0271	1.55215	1.91272
ENO3	17	4948092	4957132	9040	+	36.5683	7.73331	5.94907	6.09472	0.00045487	0.00228414	1.5269	0.610606	1.5269	7.36557	4.82387	1.2638	1.84477
ENPP2	8	119557086	119673454	116368	-	90.3096	21.0947	13.9691	15.0516	6.69411e-07	1.74214e-05	2.14574	1.10147	2.14574	20.5337	9.56952	1.81633	2.53488
ENTR1	9	136401922	136410615	8693	-	97.2828	22.1403	15.5563	16.2138	2.29306e-05	0.000236886	0.577526	-0.792042	-1.73152	11.8716	20.556	-2.05574	-1.45844
EPB41L1	20	36091504	36232800	141296	+	215.135	49.4708	34.2518	35.8558	2.20515e-07	8.57538e-06	1.824	0.867102	1.824	46.318	25.3937	1.62384	2.04883
EPB41L2	6	130839347	131063323	223976	-	761.984	159.475	123.243	126.997	2.64175e-08	1.99726e-06	0.612018	-0.708354	-1.63394	96.4315	157.563	-1.76537	-1.51229
EPB41L3	18	5392381	5630701	238320	-	636.824	136.743	102.713	106.137	2.6119e-08	1.997e-06	1.67046	0.740246	1.67046	132.785	79.4899	1.5409	1.81091
EPHX1	1	225810092	225845564	35472	+	31.1039	7.50316	4.90879	5.18399	4.31754e-05	0.000380173	1.9001	0.926076	1.9001	6.79293	3.57504	1.53002	2.35969
EPHX2	8	27490781	27545565	54784	+	17.6748	4.07869	2.8345	2.94579	0.001526	0.0059241	1.6719	0.741492	1.6719	3.68657	2.20502	1.27706	2.18882
EPOP	17	38671703	38674958	3255	-	91.4227	21.2325	14.6832	15.2371	1.67556e-05	0.00018771	0.591124	-0.758468	-1.69169	11.3216	19.1526	-1.98289	-1.44326
ERBB2	17	39687914	39730427	42513	+	6.72257	1.97943	1.01534	1.12043	0.00289683	0.00981866	2.18516	1.12774	2.18516	1.53733	0.703529	1.3867	3.44339
ERLIN1	10	100150094	100186034	35940	-	322.208	67.278	52.5159	53.7014	7.18605e-07	1.81096e-05	0.656304	-0.607565	-1.52368	42.5579	64.8449	-1.66997	-1.39021
ERMAP	1	42817122	42844992	27870	+	21.2948	5.29167	3.4323	3.54913	0.0147473	0.0362758	1.50465	0.589432	1.50465	4.26423	2.83403	1.11421	2.03191
ESF1	20	13714322	13784887	70565	-	488.415	109.179	78.513	81.4024	1.56168e-05	0.000178197	0.604661	-0.725801	-1.65382	61.3474	101.457	-1.92594	-1.42015
ETFB	19	51345169	51366389	21220	-	15.521	3.54449	2.5034	2.58684	0.00633812	0.0183748	1.57245	0.653017	1.57245	3.16249	2.01118	1.17667	2.10136
ETNK2	1	204131062	204152045	20983	-	64.2725	15.5586	10.1876	10.7121	0.000217368	0.00131147	1.77176	0.825181	1.77176	13.6947	7.72946	1.40037	2.24164
ETV1	7	13891229	13991426	100197	-	239.418	54.6005	38.4558	39.903	5.55455e-07	1.5462e-05	1.71144	0.77521	1.71144	50.3729	29.4331	1.52721	1.91789
ETV5	3	186046314	186110319	64005	-	536.982	115.63	86.0463	89.497	7.11352e-09	8.67272e-07	1.75813	0.814043	1.75813	114.097	64.8968	1.62564	1.90142
EXOSC5	19	41386374	41397360	10986	-	11.0322	2.66646	1.672	1.8387	0.00440082	0.0136943	0.499225	-1.00224	-2.0031	1.22453	2.45287	-3.20421	-1.25224
EXOSC7	3	44975241	45036067	60826	+	111.922	24.1072	18.1416	18.6536	8.19201e-06	0.000108264	0.628536	-0.669932	-1.591	14.3988	22.9085	-1.81264	-1.39646
EYS	6	63719980	65707227	1987247	-	55.7578	12.5723	8.74959	9.29297	5.34916e-07	1.51761e-05	2.0147	1.01056	2.0147	12.4208	6.16511	1.73707	2.33669
FADS2	11	61792980	61867355	74375	+	723.807	165.694	117.136	120.635	3.33275e-05	0.000313597	1.56733	0.648306	1.56733	147.292	93.9768	1.35449	1.81361
FAH	15	80152490	80186947	34457	+	24.0075	5.34603	3.88475	4.00125	0.000981125	0.00420089	0.631498	-0.663149	-1.58354	3.0975	4.90501	-1.98831	-1.26117
FAIM2	12	49866896	49904218	37322	-	103.785	28.9076	14.872	17.2976	5.16874e-08	3.23836e-06	3.02355	1.59624	3.02355	25.9969	8.59816	2.51333	3.63734
FAM114A1	4	38867677	38945740	78063	+	20.6735	4.53036	3.34163	3.44559	0.00189701	0.00706056	1.57769	0.657814	1.57769	4.21779	2.67339	1.22825	2.02655
FAM120B	6	170290703	170407066	116363	+	316.298	76.603	47.9545	52.7164	1.20799e-09	3.63284e-07	0.414836	-1.26939	-2.41059	30.9133	74.5194	-2.67324	-2.17374
FAM131A	3	184335926	184348422	12496	+	14.3008	3.87215	2.01682	2.38347	8.47902e-05	0.00062806	2.94702	1.55926	2.94702	3.5592	1.20773	1.95577	4.44067
FAM131B	7	143353400	143362771	9371	-	114.831	28.8615	17.8505	19.1384	1.3793e-06	2.88948e-05	2.07682	1.05437	2.07682	25.8365	12.4404	1.75305	2.46038
FAM155A	13	107163510	107867497	703987	-	36.5508	7.47504	5.90513	6.0918	0.00164295	0.0062808	1.53983	0.622772	1.53983	7.38659	4.79701	1.2143	1.95263
FAM160A1	4	151409176	151670504	261328	+	14.1472	3.42828	2.23185	2.35787	0.00241641	0.00853819	0.558864	-0.83943	-1.78934	1.69063	3.02512	-2.49488	-1.28333
FAM161B	14	73931501	73950415	18914	-	59.2256	13.5987	9.59456	9.87093	0.00034004	0.00183364	1.55424	0.636206	1.55424	12.0128	7.72907	1.28733	1.87648
FAM162A	3	122384176	122412335	28159	+	89.8582	19.8217	14.5836	14.9764	2.44237e-05	0.000248703	0.637451	-0.649614	-1.56875	11.6604	18.2923	-1.80791	-1.36123
FAM167A	8	11421476	11475909	54433	-	122.333	26.8646	19.8852	20.3888	6.6704e-05	0.000529757	1.5267	0.610419	1.5267	24.639	16.1387	1.31503	1.77244
FAM168A	11	73400487	73598190	197703	-	707.879	147.732	115.291	117.98	2.2969e-07	8.74218e-06	1.53314	0.616487	1.53314	142.81	93.1491	1.41087	1.666
FAM20C	7	192571	260773	68202	+	42.2803	9.52852	6.84882	7.04672	0.000660023	0.00306628	1.55005	0.632313	1.55005	8.5667	5.52673	1.26084	1.90559
FAM214B	9	35104112	35116342	12230	-	13.1665	3.63655	1.93	2.19441	0.000100057	0.000714176	2.62779	1.39385	2.62779	3.17904	1.20978	1.8375	3.75798
FAM218A	4	164956948	164959123	2175	+	18.0943	4.51724	2.86134	3.01572	0.000647593	0.00302411	1.82359	0.866785	1.82359	3.89535	2.13608	1.37493	2.41866
FAM219A	9	34398184	34458571	60387	-	156.684	38.2518	24.5542	26.114	3.34246e-07	1.09884e-05	2.00349	1.00251	2.00349	34.8388	17.3891	1.74253	2.30353
FAM228B	2	24076526	24169641	93115	+	13.8838	3.67796	2.20063	2.31396	0.00112348	0.00465382	1.81304	0.858412	1.81304	2.98276	1.64517	1.35242	2.43054
FAM234A	16	234521	272184	37663	+	55.5527	12.5102	9.0396	9.25878	0.000328623	0.00178533	1.51201	0.596472	1.51201	11.146	7.37159	1.26875	1.80192
FAM241B	10	69630247	69633597	3350	+	23.027	5.01748	3.66658	3.83784	0.00351437	0.0114492	1.64671	0.719584	1.64671	4.77559	2.90009	1.2043	2.25164
FAM47E	4	76214040	76283784	69744	+	12.9581	3.41245	1.98736	2.15968	0.000175328	0.00110823	2.19198	1.13224	2.19198	2.96617	1.35319	1.60312	2.99715
FAM66B	8	7298744	7355360	56616	-	14.2742	3.49846	2.17325	2.37903	0.00191143	0.00710251	2.02922	1.02092	2.02922	3.18734	1.57072	1.34352	3.06489
FAM66C	12	8180209	8216152	35943	+	11.3723	2.70396	1.77929	1.89538	0.00189072	0.00704085	1.88812	0.916951	1.88812	2.47823	1.31254	1.32698	2.68656
FAM66D	8	12115767	12177551	61784	+	25.2938	5.67671	3.94005	4.21563	0.000306366	0.00168607	1.94366	0.958776	1.94366	5.56706	2.86421	1.4498	2.60575
FAM72A	1	206186179	206204415	18236	-	188.055	41.0139	30.0505	31.3425	2.29972e-07	8.74218e-06	0.560895	-0.834198	-1.78287	22.5254	40.1597	-1.99563	-1.59279
FAM72D	1	145095974	145112697	16723	+	177.627	36.3999	28.8898	29.6045	6.37189e-06	8.9637e-05	0.648571	-0.624663	-1.54185	23.2936	35.9153	-1.73635	-1.36914
FAM86C2P	11	67791648	67805337	13689	-	8.15188	1.967	1.27561	1.35865	0.00247202	0.00869834	0.520024	-0.943349	-1.92299	0.929629	1.78766	-2.78685	-1.3269
FAM89B	11	65572349	65574199	1850	+	28.1819	8.79103	4.31344	4.69699	0.000857172	0.00376749	2.06353	1.04511	2.06353	6.32759	3.06639	1.48008	2.87697
FAS	10	88990531	89017060	26529	+	9.27717	2.05381	1.50497	1.54619	0.00694152	0.0198227	0.634343	-0.656665	-1.57643	1.20026	1.89213	-2.13161	-1.16585
FAT1	4	186587794	186726723	138929	-	169.297	41.1034	27.2998	28.2162	9.057e-05	0.000661459	0.623798	-0.68085	-1.60308	21.679	34.7533	-1.90194	-1.35119
FAT3	11	92352096	92896471	544375	+	21.9283	4.77721	3.54351	3.65471	0.000425376	0.00217361	0.612515	-0.707182	-1.63261	2.77649	4.53294	-2.02837	-1.31407
FAXC	6	99271168	99350063	78895	-	519.584	111.131	84.5271	86.5974	4.6236e-07	1.37822e-05	1.54664	0.629138	1.54664	105.186	68.0091	1.41253	1.69348
FBL	19	39834458	39846380	11922	-	516.063	119.578	82.35	86.0105	4.37921e-06	6.93956e-05	0.569651	-0.811849	-1.75546	62.4291	109.592	-2.0361	-1.5135
FBLIM1	1	15756607	15786595	29988	+	15.5949	4.0048	2.36871	2.59914	1.84816e-05	0.000201541	2.36632	1.24265	2.36632	3.65408	1.5442	1.81793	3.08015
FBN2	5	128257909	128659186	401277	-	65.6997	16.6431	9.96098	10.95	2.99376e-07	1.03884e-05	0.41917	-1.25439	-2.38567	6.46841	15.4315	-2.83948	-2.00439
FBXL16	16	692498	705809	13311	-	45.5984	11.8761	7.28104	7.59974	0.000470982	0.00233987	1.69574	0.761914	1.69574	9.56114	5.63833	1.34507	2.13782
FCHSD1	5	141639302	141651419	12117	-	6.36073	1.4868	1.0117	1.06012	0.0036694	0.0118233	1.82087	0.864629	1.82087	1.36862	0.751627	1.27153	2.60755
FGF14	13	101710804	102402458	691654	-	56.3626	12.0166	9.05086	9.39376	6.42934e-05	0.000513626	1.6826	0.750695	1.6826	11.7841	7.00347	1.39749	2.02588
FGF19	11	69698238	69704023	5785	-	6.77017	1.79531	1.03165	1.12836	0.00136036	0.00538799	2.18891	1.13021	2.18891	1.54904	0.707678	1.44732	3.31048
FGFR2	10	121478332	121598459	120127	-	60.8173	13.0367	9.71138	10.1362	2.08507e-05	0.000220966	0.567315	-0.817778	-1.76269	7.33793	12.9345	-2.10561	-1.47562
FGFR3	4	1793293	1808873	15580	+	7.74334	1.9334	1.21347	1.29056	0.00220269	0.00791685	1.92557	0.945284	1.92557	1.69885	0.882261	1.3336	2.78031
FGFRL1	4	1009936	1026899	16963	+	21.1033	5.64862	3.26159	3.51722	0.000107701	0.000758336	0.475417	-1.07273	-2.10342	2.26667	4.76776	-2.76431	-1.60053
FHIT	3	59747277	61251460	1504183	-	6.30522	1.47309	1.00756	1.05087	0.0104354	0.027577	1.69807	0.763898	1.69807	1.32276	0.778978	1.15678	2.49265
FHOD1	16	67229387	67247482	18095	-	7.70773	1.76526	1.23695	1.28462	0.0133013	0.0334646	0.61543	-0.700334	-1.62488	0.978803	1.59044	-2.34076	-1.12794
FICD	12	108515277	108525838	10561	+	19.4924	4.29797	3.13405	3.24873	0.00103357	0.00437103	1.65449	0.726387	1.65449	4.04974	2.44773	1.28442	2.13119
FILIP1	6	75291859	75493801	201942	-	8.83792	2.7154	1.01728	1.47299	1.42379e-05	0.000165263	5.54623	2.47151	5.54623	2.49595	0.450026	3.25563	9.44848
FILIP1L	3	99830141	100114514	284373	-	10.3357	2.45602	1.58839	1.72262	7.45412e-05	0.000571296	2.2549	1.17306	2.2549	2.38676	1.05848	1.68502	3.0175
FJX1	11	35618460	35620866	2406	+	58.9236	13.6171	9.44482	9.8206	1.65608e-05	0.000186198	0.578161	-0.790457	-1.72962	7.19557	12.4456	-2.0403	-1.46625
FKBP1B	2	24049701	24063682	13981	+	52.7093	11.0992	8.45733	8.78488	0.000251691	0.00145251	1.65581	0.727535	1.65581	10.9542	6.6156	1.33666	2.05115
FKBP4P7	9	62710036	62711399	1363	-	8.46412	1.99847	1.31491	1.41069	0.0036778	0.0118448	0.521319	-0.93976	-1.91821	0.966817	1.85456	-2.87948	-1.27785
FKBP8	19	18531751	18544078	12327	-	50.678	13.7173	8.06733	8.44633	0.0150145	0.0368167	1.56649	0.647533	1.56649	10.3106	6.58201	1.14245	2.14791
FKRP	19	46746046	46776989	30943	+	46.9724	11.0993	7.51171	7.82873	3.42671e-05	0.00032026	1.75083	0.808043	1.75083	9.96556	5.69189	1.45847	2.10181
FLNC	7	128830377	128859275	28898	+	182.062	41.8423	29.4239	30.3436	0.000325333	0.00177386	1.55114	0.63333	1.55114	36.8989	23.7882	1.28803	1.868
FLOT1	6	30727709	30742733	15024	-	425.735	93.1203	69.0132	70.9559	1.73193e-05	0.000192575	1.56115	0.642608	1.56115	86.5024	55.4094	1.36512	1.78533
FLOT2	17	28879335	28897734	18399	-	85.8533	19.8855	13.7194	14.3089	3.19947e-05	0.000304489	1.7374	0.796933	1.7374	18.1634	10.4543	1.45386	2.07625
FMN1	15	32765544	33194715	429171	-	92.8292	20.2504	14.8495	15.4715	1.15589e-06	2.56746e-05	1.77234	0.825653	1.77234	19.7817	11.1614	1.55473	2.0204
FMNL1	17	45221444	45247320	25876	+	8.7647	2.08402	1.41709	1.46078	0.0176392	0.0421231	1.54934	0.631655	1.54934	1.77556	1.14601	1.10453	2.17328
FMO5	1	147175351	147243051	67700	-	6.96694	1.66662	1.10548	1.16116	0.00348321	0.0113778	1.82285	0.866197	1.82285	1.49963	0.822684	1.27454	2.60706
FN3K	17	82735615	82751197	15582	+	26.5601	6.53651	4.30038	4.42668	0.00483591	0.0147497	1.51389	0.598257	1.51389	5.33158	3.52178	1.17652	1.94799
FNDC4	2	27491883	27495201	3318	-	50.4969	11.507	8.13999	8.41615	0.0047978	0.0146566	1.51959	0.603685	1.51959	10.1517	6.68056	1.17555	1.96432
FNDC5	1	32862268	32872483	10215	-	402.517	91.5093	63.6136	67.0861	2.20659e-08	1.78813e-06	1.91892	0.940294	1.91892	88.2058	45.9664	1.73489	2.12247
FO393411.1	6	39958414	39958834	420	-	25.5129	5.74477	4.09324	4.25216	0.000150254	0.000985102	0.58134	-0.782545	-1.72016	3.1264	5.37792	-2.12435	-1.39288
FP565260.1	21	5130871	5154659	23788	-	33.988	7.36151	5.46982	5.66467	0.00681676	0.0195447	0.663098	-0.592705	-1.50807	4.51715	6.81218	-2.00619	-1.13363
FRAS1	4	78057323	78544270	486947	+	42.7086	11.5493	6.40327	7.11809	6.24059e-07	1.66248e-05	0.398027	-1.32906	-2.51239	4.05313	10.1831	-3.05989	-2.06285
FRAT2	10	97332497	97334730	2233	-	29.9851	7.31292	4.85705	4.99752	0.00252511	0.00882322	0.654042	-0.612545	-1.52895	3.95224	6.0428	-1.933	-1.20936
FRMD4B	3	69168782	69542584	373802	-	164.329	37.5224	26.0972	27.3881	1.10645e-06	2.47497e-05	0.543381	-0.879964	-1.84033	19.2852	35.491	-2.11545	-1.60099
FRMPD3	X	107522450	107605252	82802	+	33.2092	7.88276	5.061	5.53487	1.67201e-06	3.31292e-05	2.33281	1.22207	2.33281	7.7483	3.32144	1.9056	2.8558
FSCN1	7	5592816	5606656	13840	+	225.159	55.3179	36.4131	37.5265	0.00101605	0.00431701	1.51519	0.5995	1.51519	45.2131	29.8399	1.2413	1.84952
FTH1P16	11	77734475	77735027	552	-	7.86288	2.11206	1.22416	1.31048	0.00706012	0.0200998	1.87881	0.90982	1.87881	1.71053	0.910431	1.24167	2.8429
FTH1P20	2	180872867	180873415	548	-	46.6386	10.0904	7.59333	7.77309	0.000486079	0.00240252	1.50283	0.58768	1.50283	9.33474	6.21145	1.24986	1.80699
FXYD6	11	117836976	117877487	40511	-	697.124	152.821	113.401	116.187	2.22443e-05	0.000232278	1.51245	0.59689	1.51245	139.885	92.4892	1.33028	1.71958
FYCO1	3	45917899	45995825	77926	-	42.834	9.33109	6.91499	7.139	7.80356e-05	0.000589646	0.610031	-0.713046	-1.63926	5.40985	8.86815	-1.95791	-1.37248
FZD8	10	35638249	35642279	4030	-	38.2965	8.61815	6.15149	6.38275	0.000154497	0.00100471	0.595929	-0.746789	-1.67805	4.76671	7.99879	-2.05708	-1.36886
GAB2	11	78215293	78418349	203056	-	146.634	36.1346	22.5054	24.4391	1.35394e-08	1.27484e-06	2.26733	1.18099	2.26733	33.9185	14.9597	2.00926	2.55855
GABARAP	17	7240008	7242450	2442	-	1195.8	249.207	194.829	199.299	4.42321e-06	7.00109e-05	1.50529	0.590045	1.50529	239.496	159.102	1.35139	1.67672
GABBR1	6	29555629	29633977	78348	-	56.241	14.0396	8.70253	9.37351	6.62477e-07	1.72742e-05	2.16204	1.11239	2.16204	12.8182	5.92877	1.83054	2.55358
GABRA2	4	46248427	46475231	226804	-	25.7995	6.14225	4.13236	4.29992	0.00019801	0.00122319	0.578607	-0.789344	-1.72829	3.1521	5.44774	-2.151	-1.38865
GABRA5	15	26866911	26949209	82298	+	111.229	25.627	17.2536	18.5381	8.63536e-08	4.47748e-06	0.467803	-1.09603	-2.13765	11.8166	25.2597	-2.44586	-1.86828
GABRB2	5	161288429	161549045	260616	-	25.57	7.42781	3.55622	4.26167	1.58836e-06	3.18448e-05	0.301585	-1.72936	-3.31581	1.97491	6.54842	-4.41246	-2.49172
GABRG3	15	26971181	27541985	570804	+	12.2571	2.99008	1.96651	2.04285	0.00345205	0.0112951	1.66503	0.735545	1.66503	2.55262	1.53308	1.23285	2.24871
GAL	11	68683779	68691176	7397	+	318.471	71.5783	51.3869	53.0786	1.28212e-06	2.74539e-05	1.64665	0.719538	1.64665	66.0472	40.1099	1.46826	1.84673
GALNT12	9	98807670	98850082	42412	+	18.8903	4.53313	3.01925	3.14839	0.00179903	0.00676286	0.595603	-0.747576	-1.67897	2.35045	3.94633	-2.2247	-1.26711
GALNT17	7	71132144	71713601	581457	+	85.2312	19.0569	13.876	14.2052	0.000151146	0.00098958	1.50511	0.589865	1.50511	17.0694	11.341	1.28473	1.76328
GALNT4	12	89519412	89524797	5385	-	21.7581	5.53817	3.10324	3.62636	3.06439e-05	0.000293371	0.345411	-1.53361	-2.8951	1.86201	5.39071	-4.13787	-2.02559
GALNT6	12	51351247	51392868	41621	-	45.0873	13.4412	5.68111	7.51456	4.31095e-09	6.54625e-07	4.73849	2.24443	4.73849	12.4101	2.619	3.85726	5.82103
GAP43	3	115623510	115721491	97981	+	285.887	71.6699	41.9233	47.6479	2.94617e-10	1.66127e-07	2.8009	1.48589	2.8009	70.2239	25.0719	2.51922	3.11407
GAR1	4	109815510	109824741	9231	+	205.831	46.0423	32.7356	34.3052	4.95686e-07	1.43951e-05	0.54697	-0.870467	-1.82826	24.2589	44.3514	-2.07658	-1.60963
GARNL3	9	127224265	127393661	169396	+	79.444	16.4899	12.8859	13.2407	2.40618e-05	0.000245757	1.5791	0.659104	1.5791	16.2137	10.2677	1.3664	1.82491
GAS5	1	173858559	173868883	10324	-	726.739	172.249	113.572	121.123	1.11631e-09	3.59935e-07	0.485407	-1.04273	-2.06013	79.1622	163.084	-2.24093	-1.89391
GCH1	14	54842008	54902827	60819	-	633.726	165.382	94.4314	105.621	8.07725e-10	3.31241e-07	2.60359	1.3805	2.60359	152.622	58.6199	2.33679	2.90085
GCHFR	15	40764068	40767709	3641	+	25.277	8.15097	3.7278	4.21284	0.000220973	0.00132458	2.4525	1.29425	2.4525	5.98522	2.44046	1.71168	3.51394
GCNT1	9	76419850	76651204	231354	+	9.34538	2.8128	1.39178	1.55756	0.000230453	0.00136308	0.400829	-1.31894	-2.49483	0.891353	2.22377	-3.595	-1.73135
GCOM1	15	57591908	57714746	122838	+	20.1232	4.66303	3.17665	3.35386	0.000228199	0.00135389	1.87655	0.908082	1.87655	4.37586	2.33186	1.44782	2.43223
GCSHP5	1	168055901	168056423	522	-	96.2036	20.958	15.6716	16.0339	2.52945e-05	0.000253504	0.656808	-0.606457	-1.52252	12.7126	19.3552	-1.73856	-1.33332
GDI1	X	154436913	154443468	6555	+	763.633	184.173	120.437	127.272	2.39646e-06	4.34433e-05	1.89077	0.918976	1.89077	166.49	88.0541	1.61587	2.21245
GDPD5	11	75434640	75525942	91302	-	7.75383	2.40114	1.11651	1.2923	0.000776798	0.00347633	2.69377	1.42963	2.69377	1.88489	0.69972	1.69278	4.28668
GEMIN5	5	154887411	154938212	50801	-	569.601	126.285	92.303	94.9335	5.42727e-07	1.53335e-05	0.626973	-0.673524	-1.59496	73.1675	116.7	-1.76041	-1.44506
GFRA2	8	21690398	21812358	121960	-	646.412	149.28	103.194	107.735	5.23074e-07	1.49963e-05	1.77563	0.828332	1.77563	137.841	77.6295	1.57439	2.00259
GGACT	13	100530164	100589529	59365	-	8.44758	1.9961	1.33433	1.40793	0.0218142	0.0498163	1.6326	0.70717	1.6326	1.74625	1.06961	1.06591	2.50057
GKAP1	9	83739425	83829517	90092	-	116.931	26.0687	18.835	19.4885	5.67753e-05	0.000466793	0.612824	-0.706456	-1.63179	14.8101	24.1669	-1.9327	-1.37773
GLDC	9	6532467	6645730	113263	-	86.5956	20.6114	13.2632	14.4326	2.52144e-08	1.96066e-06	0.435024	-1.20083	-2.29873	8.75041	20.1148	-2.61929	-2.01739
GLDCP1	4	56593004	56595682	2678	+	17.8393	5.21062	2.70177	2.97321	0.000124308	0.000850892	0.436292	-1.19663	-2.29204	1.8063	4.14013	-3.12511	-1.68105
GLIDR	9	39748514	39810098	61584	-	38.0124	8.6062	6.16357	6.3354	0.00125244	0.00504443	1.526	0.609752	1.526	7.65465	5.01616	1.22803	1.89626
GLIPR2	9	36136536	36163914	27378	+	95.8442	21.1284	15.623	15.974	6.04134e-05	0.000489087	1.50337	0.588199	1.50337	19.186	12.762	1.30519	1.73164
GLO1	6	38675925	38703146	27221	-	3525.16	735.225	574.515	587.527	4.93642e-07	1.43666e-05	0.659697	-0.600124	-1.51585	467.061	707.993	-1.65394	-1.38929
GLRX	5	95751319	95822727	71408	-	146.4	30.8513	23.6033	24.4001	6.57008e-07	1.71842e-05	1.67398	0.743283	1.67398	30.5501	18.25	1.49747	1.8713
GMIP	19	19629476	19643658	14182	-	50.4218	10.9555	8.12291	8.40363	9.30537e-05	0.000674141	1.64678	0.719647	1.64678	10.4572	6.35008	1.36846	1.9817
GNAO1	16	56191489	56357445	165956	+	484.166	105.687	78.5981	80.6943	2.53073e-05	0.000253504	1.53785	0.620912	1.53785	97.7958	63.5927	1.34298	1.76098
GNAZ	22	23070519	23125033	54514	+	73.6288	15.8808	11.8604	12.2715	2.48538e-05	0.000251005	1.65877	0.730115	1.65877	15.312	9.23093	1.41208	1.94856
GNG2	14	51826195	51979343	153148	+	573.982	135.295	90.4981	95.6636	2.0093e-08	1.67851e-06	1.94399	0.959021	1.94399	126.338	64.9891	1.75551	2.15271
GNL3	3	52681156	52694498	13342	+	910.344	196.93	145.832	151.724	4.81713e-09	6.79065e-07	0.568097	-0.815792	-1.76026	109.934	193.514	-1.89864	-1.63197
GOLGA6L10	15	82339993	82349476	9483	-	20.1578	4.16375	3.22038	3.35963	0.0154432	0.0376525	0.664935	-0.588716	-1.50391	2.68351	4.03575	-2.12615	-1.06377
GOLGA7B	10	97849843	97871581	21738	+	97.7098	22.6474	15.7484	16.285	0.000165996	0.00106064	1.60566	0.683171	1.60566	20.0703	12.4997	1.33219	1.93528
GOLGA8A	15	34379068	34437467	58399	-	75.8527	17.527	12.1655	12.6421	0.000195124	0.00121018	0.604796	-0.72548	-1.65345	9.52881	15.7554	-2.02945	-1.34711
GPAT4	8	41577187	41625002	47815	+	701.451	149.001	113.365	116.908	7.45152e-08	4.18277e-06	1.63955	0.713296	1.63955	145.235	88.5823	1.50434	1.78691
GPATCH4	1	156594487	156601497	7010	-	355.055	82.8115	56.5551	59.1759	8.48116e-08	4.43967e-06	0.549543	-0.863696	-1.81969	41.9733	76.3785	-2.02191	-1.6377
GPM6B	X	13770939	13938639	167700	-	172.26	39.4717	27.3819	28.71	1.86945e-06	3.59875e-05	0.548666	-0.865999	-1.8226	20.3429	37.077	-2.10541	-1.57778
GPR137C	14	52552836	52637714	84878	+	77.9176	22.1034	11.5422	12.9863	2.29104e-07	8.74218e-06	2.63415	1.39734	2.63415	18.8257	7.14679	2.18431	3.17664
GPR153	1	6247353	6261099	13746	-	9.59862	2.62387	1.44169	1.59977	0.000444209	0.00224477	2.3491	1.23211	2.3491	2.2442	0.955342	1.60192	3.44479
GPR155	2	174431571	174487095	55524	-	150.24	34.2514	23.4531	25.04	2.35393e-08	1.87387e-06	2.07248	1.05136	2.07248	33.7806	16.2995	1.84989	2.32186
GPR162	12	6821624	6829973	8349	+	36.0989	9.16027	5.66153	6.01648	2.87987e-05	0.000281599	1.96612	0.97535	1.96612	7.97616	4.05681	1.58423	2.44006
GPR173	X	53048789	53080616	31827	+	62.6388	13.9935	10.1474	10.4398	6.04181e-05	0.000489087	1.58877	0.667909	1.58877	12.8141	8.06545	1.35237	1.86648
GPR26	10	123666355	123697400	31045	+	108.673	25.3144	17.2347	18.1122	7.84424e-07	1.93716e-05	0.534808	-0.902908	-1.86983	12.6225	23.6019	-2.14462	-1.63025
GPRC5B	16	19856691	19886168	29477	-	22.086	5.28305	3.57503	3.681	0.00614904	0.0179381	0.660407	-0.598572	-1.51422	2.92815	4.43385	-1.97576	-1.16049
GPRIN3	4	89236383	89307801	71418	-	1257.73	292.874	199.108	209.622	9.11701e-08	4.62641e-06	1.88343	0.913363	1.88343	273.846	145.398	1.68299	2.10774
GPX3	5	151020438	151028993	8555	+	32.2842	9.24186	4.78284	5.3807	3.38355e-06	5.68814e-05	2.6065	1.38212	2.6065	7.77751	2.98389	2.04253	3.3262
GPX8	5	55160167	55167298	7131	+	19.2742	5.17903	2.66447	3.21237	3.09818e-07	1.05611e-05	0.285844	-1.8067	-3.49841	1.42822	4.99652	-4.49895	-2.72039
GREB1L	18	21242242	21525418	283176	+	364.134	79.1597	58.8475	60.689	6.86195e-07	1.76982e-05	1.63092	0.705684	1.63092	75.2427	46.1352	1.46689	1.81328
GRIK5	19	41998321	42069499	71178	-	19.2657	4.87939	3.0106	3.21095	0.000382246	0.00199794	1.9536	0.966133	1.9536	4.24763	2.17426	1.46348	2.60786
GRIN3A	9	101569352	101738648	169296	-	9.50311	2.85402	1.4442	1.58385	0.000759266	0.00342163	2.2219	1.1518	2.2219	2.18453	0.983177	1.52863	3.2296
GRINA	8	143990056	143993416	3360	+	62.4822	14.9142	10.0294	10.4137	3.04735e-05	0.00029248	1.70138	0.766706	1.70138	13.1175	7.7099	1.43481	2.01748
GRIP1	12	66347431	67069163	721732	-	298.101	70.1348	47.3635	49.6835	3.18437e-07	1.0642e-05	0.543596	-0.879394	-1.8396	34.9933	64.3737	-2.07909	-1.6277
GRPEL1	4	7058895	7068065	9170	-	255.289	54.9723	41.3672	42.5481	1.39857e-06	2.9163e-05	0.626507	-0.674598	-1.59615	32.7778	52.3184	-1.78041	-1.43096
GSDME	7	24698355	24757941	59586	-	152.978	32.8202	24.9238	25.4963	6.99611e-06	9.59254e-05	1.523	0.606915	1.523	30.7815	20.2111	1.35666	1.70974
GSG1L	16	27787528	28063715	276187	-	72.1919	18.8913	10.8893	12.032	7.49266e-08	4.18277e-06	2.46007	1.2987	2.46007	17.1092	6.95476	2.10357	2.87699
GTF2H2B	5	70415352	70448016	32664	+	49.3055	10.7024	7.9944	8.21759	0.000342149	0.00184164	0.644798	-0.633081	-1.55087	6.44296	9.99222	-1.87454	-1.28309
GTF2IRD2	7	74796144	74851552	55408	-	43.7333	10.623	6.83044	7.28888	0.000289127	0.00161885	1.90738	0.93159	1.90738	9.5637	5.01406	1.44644	2.5152
GTF2IRD2B	7	75092573	75149818	57245	+	91.0531	22.1138	14.5804	15.1755	5.98408e-05	0.000486382	1.70113	0.766496	1.70113	19.1146	11.2364	1.41669	2.04268
GUCY1A1	4	155666711	155732350	65639	+	91.603	19.5997	14.8931	15.2672	1.98513e-05	0.000213044	0.645053	-0.632511	-1.55026	11.973	18.5613	-1.77462	-1.35426
H1-0	22	37805093	37807437	2344	+	416.467	85.7099	67.9696	69.4112	5.36697e-07	1.51948e-05	1.50474	0.589511	1.50474	83.3985	55.424	1.38017	1.64055
H19	11	1995176	2001471	6295	-	93.0774	26.9282	13.0294	15.5129	1.34899e-08	1.27484e-06	3.32127	1.73174	3.32127	23.846	7.17978	2.78263	3.96419
H2AC11	6	27133042	27135292	2250	+	7.94865	1.94811	1.25486	1.32478	0.0174535	0.0417385	1.66209	0.733001	1.66209	1.65426	0.995288	1.09121	2.53164
H2AC6	6	26124145	26139117	14972	+	29.0739	8.56187	3.94899	4.84564	6.05362e-08	3.6737e-06	3.71743	1.8943	3.71743	7.63693	2.05436	2.97162	4.65041
H2BC19P	1	149842875	149846487	3612	+	21.6046	5.28027	3.36418	3.60076	0.000302562	0.00167194	1.97053	0.978587	1.97053	4.77721	2.42432	1.47177	2.63832
H2BC21	1	149884459	149886653	2194	-	29.6906	8.20113	3.99405	4.94843	5.25406e-08	3.26161e-06	3.83669	1.93986	3.83669	7.85065	2.0462	3.05771	4.81412
H2BC5	6	26158146	26171350	13204	+	12.6312	3.85083	1.61077	2.1052	3.2356e-07	1.07438e-05	4.56726	2.19133	4.56726	3.45413	0.756281	3.36406	6.20078
H2BC9	6	26251651	26253711	2060	+	14.5741	3.17624	2.35598	2.42902	0.00248769	0.00872853	1.59941	0.677538	1.59941	2.98913	1.8689	1.2246	2.08893
H3C6	6	26224199	26227474	3275	+	7.93341	2.71593	1.07698	1.32224	0.00017546	0.00110854	3.34382	1.7415	3.34382	2.03568	0.60879	2.06353	5.41844
H4C15	1	149854045	149861211	7166	-	17.1217	4.30918	2.63938	2.85361	0.000467003	0.00232978	2.05265	1.03749	2.05265	3.83763	1.8696	1.47392	2.85863
HAGH	16	1795620	1827158	31538	-	32.1629	8.42378	5.13431	5.36048	0.0052241	0.0157141	1.61413	0.690756	1.61413	6.6198	4.10116	1.20605	2.16029
HCN2	19	589881	617160	27279	+	9.8273	2.76196	1.52575	1.63788	0.00262529	0.00909344	1.95615	0.968018	1.95615	2.16765	1.10812	1.34474	2.84555
HCN3	1	155277463	155289849	12386	+	49.9199	11.8301	7.95508	8.31998	0.000274634	0.00155768	1.72595	0.787394	1.72595	10.5357	6.10427	1.37263	2.17023
HCN4	15	73319859	73368959	49100	-	50.6386	10.9095	8.21819	8.43977	0.000739882	0.00335663	1.52029	0.604345	1.52029	10.1821	6.69746	1.24439	1.85736
HDAC11	3	13479724	13506425	26701	+	7.31292	1.65722	1.16436	1.21882	0.00599285	0.0175772	1.74249	0.801153	1.74249	1.5488	0.88884	1.20782	2.51386
HEATR1	1	236549005	236604517	55512	-	1329.39	273.295	216.994	221.565	7.75319e-08	4.2308e-06	0.66446	-0.589747	-1.50498	176.9	266.231	-1.61644	-1.40121
HECTD4	12	112160188	112382440	222252	-	418.127	93.0745	67.1287	69.6878	1.74592e-05	0.000193193	1.66838	0.738448	1.66838	87.1433	52.2323	1.42606	1.95187
HECW1	7	43112629	43566002	453373	+	10.6038	3.7717	1.3515	1.76729	5.28084e-05	0.000442238	4.07936	2.02834	4.07936	2.83872	0.695873	2.49952	6.65774
HEG1	3	124965710	125055998	90288	-	507.913	113.846	80.5711	84.6521	9.23639e-09	1.00803e-06	1.87836	0.909475	1.87836	110.485	58.8196	1.71712	2.05475
HELB	12	66302493	66343644	41151	+	37.1944	8.17031	6.05996	6.19906	0.00045363	0.00228206	0.661614	-0.595938	-1.51146	4.93663	7.46149	-1.81574	-1.25816
HELZ2	20	63558086	63574240	16154	-	8.36301	2.39371	1.21786	1.39384	0.00909	0.0246869	2.20187	1.13873	2.20187	1.91703	0.870637	1.23685	3.91985
HERC3	4	88592434	88708542	116108	+	62.6526	13.5397	10.1405	10.4421	0.000910337	0.00396256	1.52707	0.610767	1.52707	12.62	8.26419	1.23529	1.88777
HEYL	1	39623435	39639644	16209	-	11.1134	2.90005	1.69459	1.85223	0.000502134	0.00246298	2.18378	1.12683	2.18378	2.54092	1.16354	1.52129	3.13478
HGSNAT	8	43140464	43202856	62392	+	163.091	37.6013	25.1627	27.1818	2.05524e-08	1.70635e-06	2.20287	1.13938	2.20287	37.3902	16.9734	1.95031	2.48813
HIF3A	19	46297046	46343434	46388	+	6.82154	1.53505	1.09138	1.13692	0.00584065	0.0172079	1.72755	0.78873	1.72755	1.44019	0.833658	1.20963	2.46723
HIVEP3	1	41506365	42035926	529561	-	27.0328	7.56564	4.14828	4.50547	2.88639e-05	0.000281905	2.19735	1.13576	2.19735	6.19269	2.81826	1.71128	2.82148
HLF	17	55264960	55325188	60228	+	65.1989	14.9984	10.5507	10.8665	8.50917e-05	0.000629948	0.62811	-0.670911	-1.59208	8.38438	13.3486	-1.88396	-1.34542
HMCN1	1	185734391	186190950	456559	+	41.2556	10.4902	6.58194	6.87593	0.000329585	0.0017884	0.581379	-0.782449	-1.72005	5.05574	8.69611	-2.16319	-1.36768
HMGCLL1	6	55434369	55579215	144846	-	6.64566	2.06132	1.00148	1.10761	0.00175613	0.0066255	2.27655	1.18685	2.27655	1.53914	0.676083	1.48003	3.50174
HMGN3-AS1	6	79233718	79236798	3080	+	18.3092	4.39765	2.87919	3.05153	0.000206345	0.00126014	1.92994	0.948554	1.92994	4.02005	2.083	1.48346	2.51078
HMX3	10	123135970	123139424	3454	+	94.1857	20.9299	15.1482	15.6976	2.59465e-06	4.57802e-05	1.70092	0.766315	1.70092	19.7713	11.6239	1.49083	1.94062
HNF4G	8	75407914	75566835	158921	+	21.7521	5.23759	3.45253	3.62535	0.00147927	0.00577414	0.575875	-0.796172	-1.73649	2.64964	4.60107	-2.32441	-1.29727
HNRNPKP3	11	43120762	43269394	148632	-	18.1296	4.21325	2.90492	3.0216	0.0013101	0.00522997	1.68262	0.750708	1.68262	3.79047	2.25272	1.28781	2.19847
HOXD-AS2	2	176121611	176137099	15488	-	13.8501	3.56044	2.19609	2.30835	0.00267765	0.00923698	1.76821	0.822288	1.76821	2.94895	1.66776	1.29052	2.42271
HPDL	1	45326895	45328680	1785	+	19.2936	4.46469	3.0235	3.2156	6.94578e-05	0.000543337	0.502186	-0.993707	-1.99129	2.14997	4.28122	-2.54833	-1.55602
HR	8	22114419	22133385	18966	-	30.2908	7.68728	4.80223	5.04846	0.00627629	0.0182378	1.65022	0.722656	1.65022	6.28708	3.80985	1.19486	2.27911
HRK	12	116856144	116881442	25298	-	371.465	80.82	59.6689	61.9108	1.98033e-07	8.02389e-06	1.71367	0.777091	1.71367	78.1928	45.6288	1.54559	1.90003
HS3ST2	16	22814162	22916339	102177	+	11.8959	3.07	1.73376	1.98266	0.00281356	0.00958609	2.24968	1.16972	2.24968	2.7451	1.22021	1.33986	3.77731
HS3ST4	16	25691959	26137686	445727	+	46.8253	9.69487	7.62807	7.80421	0.000269442	0.00153273	1.51092	0.595424	1.51092	9.3922	6.21623	1.27102	1.79609
HSD11B1L	19	5680604	5688524	7920	+	6.93531	1.9334	1.05931	1.15589	0.00187469	0.00700062	2.1528	1.10621	2.1528	1.57853	0.733244	1.42479	3.25279
HSP90AB2P	4	13333414	13338658	5244	+	23.0698	5.01032	3.66308	3.84496	0.00456817	0.014079	0.609176	-0.715069	-1.64156	2.91113	4.7788	-2.2775	-1.18319
HSPA9P1	2	221961737	221963766	2029	+	35.489	8.18005	5.71387	5.91483	0.000316916	0.00173566	0.609673	-0.713892	-1.64022	4.48056	7.34911	-2.02711	-1.32717
HSPD1	2	197486584	197516738	30154	-	8971.74	1890.64	1447.37	1495.29	3.94032e-09	6.27346e-07	0.598769	-0.739929	-1.67009	1120.03	1870.55	-1.78642	-1.56134
HSPD1P1	5	21882585	21884311	1726	+	873.6	184.93	140.782	145.6	1.18133e-08	1.20203e-06	0.594222	-0.750926	-1.68287	108.54	182.66	-1.8156	-1.55985
HSPD1P4	12	56511002	56512704	1702	+	210.458	45.8556	33.7171	35.0763	9.66841e-08	4.78522e-06	0.569079	-0.813299	-1.75723	25.4432	44.7094	-1.94341	-1.58888
HSPD1P5	4	144845625	144847345	1720	+	20.0998	5.11487	3.22386	3.34997	0.00178674	0.00672319	0.603466	-0.728657	-1.6571	2.52153	4.17841	-2.1597	-1.27146
HSPD1P6	3	36767117	36784168	17051	-	75.3584	16.7009	12.0672	12.5597	1.15157e-05	0.000140652	0.576246	-0.795244	-1.73537	9.18321	15.9363	-2.03842	-1.47737
HSPE1	2	197500140	197503450	3310	+	1350.8	327.057	205.012	225.133	5.01955e-11	7.54772e-08	0.415785	-1.26609	-2.40509	132.233	318.033	-2.59618	-2.22806
HSPE1P2	14	63601509	63601815	306	+	89.7121	22.2109	13.5042	14.952	3.0942e-07	1.05611e-05	0.408085	-1.29306	-2.45047	8.66666	21.2374	-2.93715	-2.04443
HSPE1P3	15	90634725	90635034	309	+	59.1162	15.5462	8.83691	9.8527	1.21787e-06	2.6583e-05	0.398332	-1.32796	-2.51047	5.61332	14.0921	-3.10151	-2.03206
HSPE1P4	12	101873316	101873624	308	-	11.3707	3.45747	1.54848	1.89512	2.70208e-05	0.0002675	0.289247	-1.78963	-3.45725	0.850353	2.93988	-5.17028	-2.31179
HTR3A	11	113974881	113990314	15433	+	90.8156	20.0236	14.62	15.1359	1.75169e-05	0.000193674	1.66518	0.73568	1.66518	18.9136	11.3583	1.42557	1.94507
IARS1	9	92210207	92293757	83550	-	2573.84	543.144	417.955	428.973	3.60799e-08	2.47853e-06	0.634109	-0.657197	-1.57702	332.922	525.024	-1.69794	-1.4647
ICA1	7	8113184	8262688	149504	-	106.967	24.1208	16.8272	17.8278	1.28402e-07	5.8904e-06	1.97932	0.985008	1.97932	23.6879	11.9677	1.74569	2.24422
ICA1L	2	202773150	202871986	98836	-	97.5189	20.7878	15.8173	16.2532	4.73112e-06	7.33153e-05	1.5938	0.672468	1.5938	19.974	12.5323	1.40901	1.80282
ID4	6	19837370	19842198	4828	+	31.2565	9.77994	4.12316	5.20942	4.94071e-05	0.000419727	3.55484	1.82978	3.55484	8.13142	2.28742	2.25052	5.61509
IDS	X	149476988	149521097	44109	-	832.94	180.835	134.762	138.823	7.95877e-08	4.31516e-06	1.62445	0.699947	1.62445	171.854	105.793	1.49206	1.76857
IER5L	9	129175552	129178262	2710	-	9.20572	2.39254	1.43186	1.53429	0.00200182	0.00735161	1.95522	0.967328	1.95522	2.03022	1.03836	1.34661	2.83888
IFI27L2	14	94127779	94130254	2475	-	18.0955	4.38568	2.76631	3.01591	2.50183e-05	0.00025154	2.27108	1.18338	2.27108	4.18784	1.84398	1.74872	2.94947
IFRD2	3	50287732	50292919	5187	-	34.5377	7.41379	5.59482	5.75629	0.00113905	0.00469819	0.648868	-0.624004	-1.54115	4.53046	6.98211	-1.92174	-1.23593
IFT22	7	101310914	101321824	10910	-	95.9703	21.1564	15.5311	15.995	6.76916e-05	0.000534053	1.58149	0.661286	1.58149	19.598	12.3921	1.3437	1.86136
IGDCC4	15	65381484	65422948	41464	-	48.4546	10.6258	7.88377	8.07576	0.000381965	0.00199734	0.66043	-0.598523	-1.51417	6.42421	9.72731	-1.81535	-1.26295
IGF2	11	2129112	2141239	12127	-	10.8732	3.35397	1.36367	1.81221	1.1829e-06	2.60295e-05	4.73625	2.24374	4.73625	2.99257	0.631844	3.32717	6.74207
IKBKB	8	42271302	42332654	61352	+	52.7433	11.8015	8.4944	8.79055	4.45119e-05	0.000389991	0.600851	-0.73492	-1.66431	6.59876	10.9824	-1.97755	-1.40068
IL12RB2	1	67307364	67397091	89727	+	16.9781	4.18606	2.56376	2.82968	5.38561e-06	8.03566e-05	0.406635	-1.29819	-2.45921	1.63603	4.02333	-3.13076	-1.9317
IL17RA	22	17084954	17115695	30741	+	97.7749	22.141	15.8547	16.2958	6.29182e-05	0.000504726	1.561	0.642466	1.561	19.8655	12.7262	1.33566	1.82434
ILK	11	6603708	6610875	7167	+	144.028	31.0737	23.328	24.0047	2.77475e-05	0.000273295	1.57824	0.658321	1.57824	29.3884	18.6209	1.3641	1.826
ING4	12	6650301	6663143	12842	-	76.5277	16.0189	12.3686	12.7546	6.81601e-06	9.38445e-05	1.63963	0.71337	1.63963	15.8453	9.66395	1.43093	1.87877
INKA2-AS1	1	111739579	111747799	8220	+	105.77	23.5668	16.8524	17.6283	3.47928e-06	5.80581e-05	1.79732	0.845847	1.79732	22.6528	12.6037	1.54491	2.09097
INSR	19	7112255	7294415	182160	-	171.689	35.9961	27.8572	28.6148	8.32129e-07	2.0254e-05	1.59065	0.669614	1.59065	35.1387	22.0908	1.43547	1.7626
INSRR	1	156840063	156859118	19055	-	17.8239	4.97145	2.63062	2.97065	7.41447e-05	0.000569274	2.53851	1.34398	2.53851	4.26225	1.67904	1.81256	3.55522
INSYN1	15	73735431	73752748	17317	-	11.1858	2.57784	1.80908	1.86429	0.00944632	0.0255064	1.56276	0.644094	1.56276	2.27367	1.45491	1.15056	2.12263
IPO4	14	24180219	24188870	8651	-	69.5231	16.5467	11.08	11.5872	9.32226e-05	0.000675003	0.574018	-0.800833	-1.74211	8.4513	14.7231	-2.14049	-1.41787
IPO5	13	97953658	98024297	70639	+	3660.86	761.329	597.604	610.143	1.02659e-07	5.01545e-06	0.666212	-0.585947	-1.50102	487.915	732.372	-1.61457	-1.39547
IQCN	19	18257097	18274510	17413	-	7.37049	2.16356	1.07713	1.22841	0.00206491	0.0075505	2.39271	1.25865	2.39271	1.73268	0.724149	1.44609	3.95899
IQGAP2	5	76403285	76708133	304848	+	9.79597	2.19032	1.5674	1.63266	0.00302771	0.0101748	0.581584	-0.78194	-1.71944	1.20073	2.06459	-2.35767	-1.25398
IQSEC1	3	12897043	13283282	386239	-	531.196	117.833	84.9083	88.5326	4.53128e-08	2.97679e-06	1.77921	0.83124	1.77921	113.355	63.7105	1.61711	1.95757
IQSEC3	12	66767	178456	111689	+	9.72819	2.71593	1.49167	1.62137	0.00789145	0.0219924	1.94951	0.963112	1.94951	2.14332	1.09941	1.25338	3.03227
IRF9	14	24161265	24166566	5301	+	10.3775	2.67306	1.6623	1.72958	0.0151091	0.0370017	1.59315	0.671879	1.59315	2.12519	1.33396	1.12029	2.26559
IRGQ	19	43584369	43596136	11767	-	345.079	76.1354	55.1452	57.5132	2.59288e-07	9.53516e-06	1.77308	0.826256	1.77308	73.5468	41.4797	1.58363	1.98518
IRS2	13	109752695	109786584	33889	-	91.9478	19.5598	14.9659	15.3246	0.000136321	0.000911481	1.50601	0.59073	1.50601	18.419	12.2303	1.28545	1.76441
ISLR2	15	74100311	74138541	38230	+	122.947	31.3933	19.1769	20.4911	3.98278e-05	0.000358133	1.96853	0.977121	1.96853	27.1767	13.8056	1.5756	2.45946
ITGA6	2	172427354	172506460	79106	+	18.2012	4.86809	2.74076	3.03354	7.8019e-06	0.00010392	2.46624	1.30231	2.46624	4.31674	1.75033	1.91844	3.17046
ITGB3	17	47253827	47313744	59917	+	11.0902	2.85402	1.67974	1.84836	0.000828457	0.00366869	2.19506	1.13426	2.19506	2.53971	1.15701	1.47927	3.25722
ITM2B	13	48232612	48270358	37746	+	1073.29	247.647	173.602	178.881	4.02773e-06	6.54348e-05	1.59763	0.675932	1.59763	220.036	137.726	1.41509	1.80372
JAG1	20	10637684	10674000	36316	-	39.1399	10.1026	5.72503	6.52332	4.43975e-07	1.34114e-05	2.78745	1.47894	2.78745	9.60193	3.4447	2.2497	3.45374
JAKMIP2	5	147585438	147782776	197338	-	415.094	89.3678	67.1451	69.1823	8.09079e-08	4.31516e-06	1.63156	0.706255	1.63156	85.7858	52.5789	1.49729	1.77787
JAKMIP3	10	132036336	132184859	148523	+	13.7641	3.77464	2.00531	2.29402	1.11213e-05	0.000136822	2.82263	1.49704	2.82263	3.38781	1.20023	2.09597	3.80122
JAM3	11	134069071	134152002	82931	+	592.262	122.966	96.4364	98.7103	3.3685e-07	1.10378e-05	0.651247	-0.618723	-1.53552	77.8621	119.559	-1.67471	-1.40789
JCAD	10	30012803	30115495	102692	-	41.3144	9.27982	6.69273	6.88573	0.000215879	0.00130423	0.631406	-0.66336	-1.58377	5.32999	8.44147	-1.90592	-1.31607
JPH1	8	74234700	74321541	86841	-	96.762	22.9498	15.0954	16.127	4.53293e-07	1.3605e-05	0.485495	-1.04247	-2.05976	10.5414	21.7126	-2.39424	-1.772
JUN	1	58780791	58784048	3257	-	186.968	47.366	27.9707	31.1614	1.27472e-08	1.25006e-06	2.54762	1.34915	2.54762	44.7553	17.5675	2.21995	2.92365
JUND	19	18279694	18281623	1929	-	235.764	55.5135	37.3427	39.294	4.24322e-06	6.79387e-05	1.84459	0.883302	1.84459	50.9608	27.6272	1.57097	2.16588
JUP	17	41754604	41786932	32328	-	17.7644	5.38573	2.44702	2.96073	9.52894e-06	0.000121198	3.37474	1.75478	3.37474	4.5679	1.35356	2.39523	4.75481
KALRN	3	124080023	124726326	646303	+	212.327	48.0907	33.7986	35.3878	4.50716e-08	2.97538e-06	1.83811	0.878221	1.83811	45.838	24.9376	1.66174	2.03319
KAT2A	17	42113111	42121368	8257	-	84.5944	17.5544	13.6775	14.0991	0.000280369	0.00158146	0.640182	-0.643447	-1.56206	11.0061	17.1921	-1.89229	-1.28946
KAT2B	3	20040446	20154405	113959	+	22.7822	5.26279	3.57418	3.79703	5.06637e-05	0.000428252	1.97578	0.982422	1.97578	5.0421	2.55196	1.56143	2.50008
KAZN	1	13892792	15118044	1225252	+	57.3542	12.1848	9.33823	9.55903	8.27082e-05	0.000616245	1.53077	0.614257	1.53077	11.5638	7.55425	1.31248	1.78536
KCND2	7	120273175	120750338	477163	+	13.7899	3.63655	1.97125	2.29831	6.58336e-05	0.000523766	2.86914	1.52062	2.86914	3.4086	1.18802	1.95282	4.21543
KCNG3	2	42442017	42493983	51966	-	16.4395	4.33076	2.4063	2.73992	5.36128e-05	0.000447866	0.380166	-1.3953	-2.63043	1.50942	3.97042	-3.70725	-1.86638
KCNH7	2	162371407	162838768	467361	-	67.0807	15.0937	10.7058	11.1801	3.8058e-05	0.000348706	1.75184	0.80887	1.75184	14.2347	8.12556	1.4528	2.11244
KCNJ6	21	37607373	38121346	513973	-	31.5668	7.50316	5.00405	5.26113	5.29072e-05	0.000442791	1.85245	0.889438	1.85245	6.83341	3.68884	1.49947	2.28853
KCNJ8	12	21764955	21775601	10646	-	126.753	32.9301	19.0648	21.1256	3.57227e-08	2.46651e-06	0.402446	-1.31313	-2.48481	12.1244	30.1267	-2.87803	-2.14531
KCNK12	2	47509290	47570986	61696	-	28.1408	5.9068	4.59006	4.69013	0.00084414	0.00372276	0.665995	-0.586417	-1.50151	3.74984	5.63043	-1.82847	-1.23302
KCNK3	2	26692690	26733421	40731	+	177.059	39.6399	28.5378	29.5098	2.43102e-05	0.000247893	1.63339	0.70787	1.63339	36.6076	22.4121	1.40159	1.90353
KCNK5	6	39188971	39229476	40505	-	9.28186	2.19032	1.48807	1.54698	0.00949332	0.0255872	0.610589	-0.711726	-1.63776	1.17295	1.92101	-2.31099	-1.16066
KCNMA1	10	76869601	77638370	768769	-	37.0801	8.20113	6.02277	6.18001	0.000452703	0.00227833	1.54342	0.626129	1.54342	7.50041	4.85961	1.2731	1.87114
KCNN1	19	17951293	18000081	48788	+	16.3545	4.05083	2.55015	2.72575	7.05798e-05	0.000550454	2.05908	1.042	2.05908	3.66943	1.78207	1.59304	2.66144
KCNQ2	20	63400210	63472678	72468	-	101.737	26.56	16.1552	16.9561	0.000227661	0.00135141	1.75052	0.807785	1.75052	21.5828	12.3294	1.40245	2.18498
KCTD12	13	76880175	76886406	6231	-	938.341	215.118	150.354	156.39	1.70146e-06	3.34678e-05	0.582157	-0.780521	-1.71775	115.088	197.692	-1.95361	-1.51037
KCTD16	5	144170873	144485687	314814	+	22.3004	5.52593	3.54963	3.71674	0.00193196	0.00714908	1.69367	0.760157	1.69367	4.67387	2.7596	1.26726	2.26357
KCTD17	22	37051736	37063391	11655	+	17.67	4.14289	2.84127	2.945	0.0105015	0.0277193	1.55703	0.638797	1.55703	3.58654	2.30345	1.1456	2.11623
KCTD21	11	78171249	78188627	17378	-	35.2208	7.483	5.71286	5.87013	0.00106104	0.00445379	1.52992	0.613457	1.52992	7.0997	4.64057	1.23252	1.89908
KCTD7	7	66628767	66649068	20301	+	194.349	44.6029	31.2667	32.3916	5.26329e-06	7.88794e-05	1.67179	0.741397	1.67179	40.5361	24.247	1.45709	1.91813
KDM5B	1	202724495	202808488	83993	-	1323.26	281.599	214.697	220.543	1.43989e-06	2.9614e-05	1.56763	0.648581	1.56763	269.298	171.787	1.41052	1.74222
KIAA0232	4	6781375	6884171	102796	+	803.204	166.985	130.22	133.867	3.18126e-08	2.29e-06	1.60205	0.679922	1.60205	164.841	102.894	1.48541	1.72786
KIAA1324L	7	86876906	87059655	182749	-	218.522	47.1449	35.1411	36.4204	2.17568e-07	8.48514e-06	1.70592	0.770548	1.70592	45.9217	26.919	1.53843	1.89165
KIAA1522	1	32741830	32774971	33141	+	84.4539	19.2872	13.6246	14.0757	5.076e-05	0.000428798	1.62838	0.703433	1.62838	17.4408	10.7105	1.38083	1.9203
KIAA1671	22	24952730	25197449	244719	+	19.8329	4.29797	3.19649	3.30548	0.00399213	0.0126761	1.56605	0.647127	1.56605	4.03464	2.57632	1.18317	2.07282
KIF13B	8	29067278	29263125	195847	-	64.1826	14.7229	10.0977	10.6971	6.86953e-07	1.76982e-05	1.97665	0.98306	1.97665	14.2069	7.18733	1.70468	2.29202
KIF1A	2	240713761	240821037	107276	-	698.382	159.083	112.945	116.397	0.000114395	0.000795939	1.55619	0.638019	1.55619	141.723	91.0706	1.32087	1.83344
KIF1B	1	10210805	10381604	170799	+	1094.73	225.204	178.598	182.455	3.752e-07	1.18358e-05	1.50554	0.590281	1.50554	219.269	145.641	1.38463	1.63701
KIF1C	17	4997950	5028402	30452	+	28.927	6.40513	4.70684	4.82117	0.000783395	0.00350122	0.654916	-0.610618	-1.52691	3.81585	5.82648	-1.86797	-1.24813
KIF25-AS1	6	167992822	167997111	4289	-	9.23186	1.99342	1.4805	1.53864	0.00206691	0.00755578	1.73337	0.793583	1.73337	1.95147	1.12582	1.28059	2.34625
KIF26A	14	104138723	104180895	42172	+	142.13	34.4313	22.8833	23.6884	3.029e-05	0.000291949	1.64418	0.71737	1.64418	29.4594	17.9174	1.40277	1.92714
KIF3C	2	25926598	25982750	56152	-	673.903	158.436	106.54	112.317	3.40174e-08	2.37298e-06	1.90868	0.932572	1.90868	147.405	77.2291	1.72005	2.11799
KIF5A	12	57550044	57586634	36590	+	211.046	52.4294	32.4447	35.1744	1.45459e-08	1.32114e-06	2.24161	1.16454	2.24161	48.647	21.7018	1.98806	2.52749
KIF5C	2	148875227	149026760	151533	+	3469.03	737.608	563.982	578.171	7.57244e-08	4.18277e-06	1.55802	0.63971	1.55802	704.296	452.047	1.44213	1.68321
KIFAP3	1	169921326	170085209	163883	-	394.852	80.7296	64.251	65.8086	2.15611e-06	4.01011e-05	1.53419	0.617478	1.53419	79.6806	51.9366	1.38139	1.7039
KIFBP	10	68988721	69043545	54824	+	345.178	71.8794	55.9278	57.5297	1.65481e-07	7.13202e-06	1.60846	0.685681	1.60846	70.9493	44.1101	1.47062	1.75922
KIRREL1	1	157993273	158100263	106990	+	210.964	47.6087	33.9683	35.1607	1.16796e-06	2.57847e-05	0.596098	-0.746378	-1.67758	26.2631	44.0583	-1.88829	-1.49037
KLC1	14	103561896	103714250	152354	+	674.787	148.52	107.156	112.465	5.69142e-09	7.57033e-07	1.86633	0.900204	1.86633	146.456	78.4729	1.71435	2.03178
KLF10	8	102648784	102655726	6942	-	369.211	81.5709	59.8479	61.5352	6.57819e-06	9.15871e-05	1.57279	0.653327	1.57279	75.235	47.8353	1.38897	1.78095
KLF12	13	73686089	73995057	308968	-	571.031	124.419	92.6713	95.1718	5.53567e-07	1.54462e-05	1.57611	0.65637	1.57611	116.456	73.8879	1.43117	1.73573
KLF9	9	70384597	70414625	30028	-	64.1753	16.4744	9.6164	10.6959	1.19027e-06	2.61493e-05	0.403681	-1.30871	-2.4772	6.15201	15.2398	-3.05688	-2.00745
KLHDC8A	1	205336065	205357091	21026	-	85.6458	19.5633	13.8768	14.2743	0.0010515	0.00442334	1.51549	0.599786	1.51549	17.1995	11.3491	1.23891	1.85382
KLHDC8B	3	49171598	49176487	4889	+	18.3662	4.55717	2.72803	3.06104	1.89048e-06	3.62892e-05	2.65317	1.40772	2.65317	4.44625	1.67582	2.09777	3.35563
KLHL13	X	117897813	118117341	219528	-	1258.93	273.258	200.535	209.822	1.8801e-09	4.38679e-07	1.83137	0.872921	1.83137	271.431	148.212	1.7006	1.97219
KLHL14	18	32672673	32773024	100351	-	7.0571	1.7618	1.12124	1.17618	0.00940224	0.0254125	0.573638	-0.801788	-1.74326	0.857507	1.49486	-2.55392	-1.18992
KLHL31	6	53647916	53665757	17841	-	7.38371	2.14311	1.11017	1.23062	0.000334431	0.00180745	0.413223	-1.27501	-2.42	0.71966	1.74158	-3.52032	-1.6636
KMT5C	19	55339853	55348122	8269	+	16.3768	4.03204	2.60388	2.72946	0.00373967	0.0119983	1.68634	0.753895	1.68634	3.42682	2.03211	1.22408	2.32317
KRBA2	17	8356902	8376705	19803	-	31.3623	7.77325	4.65971	5.22705	1.88101e-05	0.000204136	2.50484	1.32472	2.50484	7.47134	2.98276	1.87573	3.34496
L1CAM	X	153861514	153886174	24660	-	447.735	118.53	66.2146	74.6226	2.59721e-09	5.14204e-07	2.68293	1.42381	2.68293	108.722	40.5235	2.36972	3.03753
LAMA1	18	6941742	7117798	176056	-	13.2849	3.4797	1.98956	2.21414	2.36163e-05	0.000242489	0.397875	-1.32961	-2.51335	1.26041	3.16787	-3.35918	-1.8805
LASP1	17	38869859	38921771	51912	+	206.035	45.3409	33.4315	34.3391	1.38898e-05	0.000161905	1.55898	0.640601	1.55898	41.8401	26.8381	1.36638	1.77872
LBH	2	30231534	30323731	92197	+	31.3374	7.97337	4.74538	5.2229	1.40288e-06	2.9208e-05	2.40982	1.26893	2.40982	7.38235	3.06344	1.96384	2.9571
LDB2	4	16501541	16898679	397138	-	44.3046	10.2381	6.87881	7.3841	2.31055e-06	4.21979e-05	0.472888	-1.08043	-2.11467	4.74151	10.0267	-2.54398	-1.7578
LDB3	10	86668449	86736069	67620	+	23.5271	5.01748	3.75095	3.92119	0.00252967	0.00882785	1.6472	0.720014	1.6472	4.87985	2.96252	1.22406	2.21661
LDHA	11	18394560	18408426	13866	+	6454.8	1480.6	1027.84	1075.8	7.43203e-09	8.81723e-07	0.547005	-0.870375	-1.82814	760.783	1390.82	-1.98845	-1.68075
LDHAP3	2	41819747	41820755	1008	+	7.63742	1.71002	1.21481	1.2729	0.00253935	0.00885696	0.552368	-0.856298	-1.81039	0.905857	1.63995	-2.53979	-1.29046
LDHAP4	9	14921337	14922335	998	-	246.685	57.1178	39.4587	41.1142	3.16594e-07	1.06314e-05	0.566704	-0.819332	-1.76459	29.7435	52.485	-1.9773	-1.57476
LDHAP5	10	118932674	118933296	622	-	9.04603	2.32775	1.4244	1.50767	0.00276866	0.00947443	0.540459	-0.887743	-1.85028	1.05791	1.95743	-2.63774	-1.29791
LDOC1	X	141111605	141177130	65525	-	65.1167	14.2237	10.5971	10.8528	0.000252076	0.00145349	1.50912	0.593709	1.50912	13.0549	8.65066	1.27342	1.78845
LGALS3	14	55124110	55145424	21314	+	18.5975	4.92542	2.80681	3.09959	1.42245e-05	0.000165263	2.41961	1.27478	2.41961	4.38634	1.81283	1.862	3.14421
LGALS3BP	17	78971238	78979948	8710	-	50.289	13.3491	7.33541	8.3815	7.42994e-07	1.85206e-05	2.78904	1.47977	2.78904	12.3389	4.42408	2.22799	3.49138
LGR5	12	71439798	71586311	146513	+	18.8754	4.18606	3.01413	3.1459	0.000665095	0.0030835	0.577044	-0.793248	-1.73297	2.30218	3.98961	-2.25227	-1.33341
LHX6	9	122202577	122229627	27050	-	16.8508	4.33293	2.61912	2.80846	0.000180832	0.00113717	0.490296	-1.02828	-2.03959	1.84792	3.769	-2.712	-1.53389
LIMK1	7	74082933	74122526	39593	+	57.3199	13.9015	9.1443	9.55331	0.000771155	0.00346023	1.68717	0.754607	1.68717	11.9963	7.11031	1.32582	2.147
LIN28B	6	104936616	105083333	146717	+	848.831	184.883	137.472	141.472	2.7551e-07	9.83768e-06	0.623164	-0.682316	-1.60471	108.628	174.316	-1.76196	-1.4615
LINC00294	11	33076149	33079455	3306	+	317.969	70.2278	50.5037	52.9949	4.1115e-07	1.27325e-05	1.84011	0.879791	1.84011	68.6709	37.3189	1.62127	2.08848
LINC00467	1	211382736	211435571	52835	+	71.1893	15.7882	11.4467	11.8649	0.000137362	0.00091663	1.64375	0.716994	1.64375	14.754	8.97578	1.35638	1.99202
LINC00652	20	18786065	18794580	8515	-	7.66895	1.71047	1.21693	1.27816	0.00449537	0.0139085	1.777	0.829441	1.777	1.63578	0.920533	1.23365	2.55966
LINC00654	20	5482736	5526710	43974	-	139.93	31.5175	22.2901	23.3217	9.01613e-07	2.14438e-05	1.81158	0.857247	1.81158	30.0536	16.5898	1.58592	2.06935
LINC00963	9	129476946	129513688	36742	+	58.1778	13.3412	9.40676	9.6963	0.000118972	0.000821038	1.59809	0.67635	1.59809	11.9284	7.46417	1.33883	1.90755
LINC01006	7	156388922	156640655	251733	-	13.6302	3.17129	2.18153	2.2717	0.000882886	0.0038617	1.7418	0.800581	1.7418	2.88631	1.65708	1.33076	2.27981
LINC01011	6	2987967	2991174	3207	+	9.13831	2.67527	1.3864	1.52305	0.0033518	0.0110472	2.10729	1.07539	2.10729	2.0658	0.980307	1.36485	3.2536
LINC01122	2	58427799	59063767	635968	+	15.575	4.3575	2.31448	2.59583	2.96187e-05	0.000287539	2.54991	1.35044	2.54991	3.72919	1.46248	1.88297	3.45308
LINC01224	19	23399233	23416076	16843	-	149.224	32.1651	24.2014	24.8707	3.04306e-05	0.00029248	1.55924	0.640846	1.55924	30.3054	19.4359	1.34923	1.80194
LINC01234	12	113583886	113773727	189841	-	20.5036	4.93809	3.26132	3.41727	0.00201686	0.00739881	1.70473	0.769545	1.70473	4.30766	2.52689	1.26602	2.29547
LINC01518	10	42644445	42691724	47279	-	9.40038	2.21993	1.4901	1.56673	0.00593752	0.0174472	1.74672	0.804647	1.74672	1.99266	1.1408	1.21901	2.50287
LINC01521	22	31346777	31348720	1943	+	10.73	2.49175	1.7328	1.78834	0.0201186	0.0468052	1.50777	0.592419	1.50777	2.15044	1.42624	1.07576	2.11328
LINC01537	11	72570660	72573230	2570	+	9.75439	2.54373	1.50023	1.62573	0.000496932	0.00244367	2.14318	1.09975	2.14318	2.21701	1.03445	1.5168	3.02823
LINC01550	14	97924637	97978125	53488	-	18.6193	4.12264	2.99267	3.10321	0.0019203	0.00711983	1.63401	0.708415	1.63401	3.85016	2.35627	1.2484	2.13872
LINC01828	2	67086446	67311440	224994	+	260.109	58.5915	41.7469	43.3515	1.38209e-06	2.89085e-05	1.71057	0.77448	1.71057	54.716	31.9869	1.509	1.93907
LINC02210-CRHR1	17	45620344	45835827	215483	+	29.6918	9.32721	4.55888	4.94864	0.0107551	0.0282838	1.80644	0.853146	1.80644	6.37064	3.52664	1.19908	2.72143
LINC02495	4	6200733	6239938	39205	+	27.786	5.62549	4.50896	4.631	0.00187992	0.00701238	0.659166	-0.601286	-1.51707	3.67968	5.58232	-1.91139	-1.2041
LINC02691	14	104223584	104288070	64486	+	30.7411	7.06089	4.82626	5.12351	4.90048e-05	0.000417621	1.94592	0.960453	1.94592	6.76864	3.47837	1.54552	2.45005
LINC02731	11	134032216	134067937	35721	+	12.6844	3.54449	1.68474	2.11406	1.44632e-05	0.000167005	3.74186	1.90376	3.74186	3.33647	0.89166	2.49177	5.6191
LINGO2	9	27948078	28670287	722209	-	10.1629	2.58235	1.55287	1.69381	0.000102116	0.000727332	2.29323	1.19738	2.29323	2.35896	1.02866	1.68402	3.12283
LMNA	1	156082573	156140090	57517	+	10.8075	2.58235	1.69928	1.80126	0.00110147	0.00458652	1.89696	0.923692	1.89696	2.35896	1.24355	1.36824	2.63001
LNP1	3	100401532	100456320	54788	+	55.6271	11.8759	9.01434	9.27118	2.40535e-05	0.000245757	0.622801	-0.683156	-1.60565	7.11621	11.4261	-1.86364	-1.38337
LOH12CR2	12	12355406	12357068	1662	-	9.14134	2.11753	1.45909	1.52356	0.0203744	0.0472701	1.58077	0.66063	1.58077	1.86642	1.1807	1.07208	2.33084
LONRF2	2	100271875	100322502	50627	-	37.2807	8.85897	5.73881	6.21346	2.65279e-06	4.65631e-05	2.20998	1.14404	2.20998	8.55558	3.87133	1.8118	2.69568
LONRF3	X	118974614	119018356	43742	+	8.81513	2.01747	1.41903	1.46919	0.00628035	0.0182425	1.64743	0.720213	1.64743	1.82848	1.1099	1.19206	2.27674
LOX	5	122063195	122078361	15166	-	157.55	37.4706	24.4624	26.2584	3.2391e-07	1.07438e-05	0.475359	-1.07291	-2.10367	16.9208	35.5959	-2.44541	-1.8097
LOXL1	15	73925989	73952138	26149	+	82.7284	20.622	13.2128	13.7881	5.86873e-05	0.000479309	1.73146	0.791992	1.73146	17.4804	10.0957	1.43466	2.08967
LPAR3	1	84811602	84893207	81605	-	137.628	38.3062	19.8008	22.9381	1.95345e-09	4.48069e-07	0.331308	-1.59376	-3.01834	11.4167	34.4595	-3.45581	-2.63625
LPCAT3	12	6976185	7018478	42293	-	89.8851	20.2349	14.2738	14.9809	3.50695e-06	5.82683e-05	1.83914	0.879033	1.83914	19.4086	10.5531	1.5722	2.15141
LRATD1	2	14632700	14650815	18115	+	7570.28	1702.65	1220.68	1261.71	3.71418e-07	1.17991e-05	1.65398	0.72594	1.65398	1572.62	950.809	1.49258	1.83283
LRATD2	8	126552443	126558479	6036	-	49.4167	14.0937	6.80678	8.23611	5.13405e-08	3.23158e-06	0.285084	-1.81054	-3.50774	3.65421	12.818	-4.33525	-2.83819
LRIG3	12	58872149	58920523	48374	-	32.569	9.63286	4.47367	5.42816	5.29502e-08	3.27203e-06	0.279669	-1.83821	-3.57566	2.37263	8.4837	-4.42924	-2.88658
LRP1	12	57128483	57213362	84879	+	44.53	11.738	7.06706	7.42167	0.000407734	0.00210284	1.75678	0.812933	1.75678	9.45904	5.38431	1.37709	2.24115
LRP10	14	22871740	22881714	9974	+	31.375	6.97671	5.0927	5.22916	0.000837454	0.00370006	1.54161	0.624435	1.54161	6.34348	4.11485	1.25086	1.89994
LRP4	11	46856717	46918643	61926	-	93.6035	20.7282	14.9134	15.6006	3.2386e-06	5.49911e-05	0.554482	-0.850788	-1.80349	11.1294	20.0718	-2.09654	-1.55139
LRRC17	7	102913000	102945112	32112	+	43.5204	10.1794	6.81197	7.2534	1.6768e-06	3.31756e-05	0.490822	-1.02673	-2.0374	4.77606	9.73074	-2.41293	-1.72031
LRRC3	21	44455510	44462197	6687	+	11.8486	3.26189	1.8336	1.97476	0.00272939	0.0093663	1.97828	0.984244	1.97828	2.62342	1.32611	1.36455	2.86803
LRRC34	3	169793003	169812987	19984	-	35.7589	8.43672	5.77563	5.95981	0.005584	0.0165756	0.662748	-0.593467	-1.50887	4.751	7.16863	-1.95561	-1.16418
LRRC55	11	57181747	57191718	9971	+	162.776	39.7761	24.6852	27.1293	8.84071e-09	9.72694e-07	2.40228	1.2644	2.40228	38.3109	15.9477	2.12099	2.72088
LRRC58	3	120324509	120349355	24846	-	787.417	186.026	124.857	131.236	2.12158e-06	3.97114e-05	0.545457	-0.874461	-1.83332	92.6376	169.835	-2.12499	-1.58169
LRRN3	7	111091006	111125455	34449	+	43.6489	11.0518	6.60495	7.27482	3.24994e-07	1.07534e-05	2.42606	1.27861	2.42606	10.3029	4.24676	2.02997	2.89943
LSG1	3	194640791	194672464	31673	-	278.913	62.033	45.0903	46.4854	7.3955e-07	1.84997e-05	0.613897	-0.703932	-1.62894	35.3644	57.6065	-1.81196	-1.46441
LTA4H	12	96000753	96043521	42768	-	781.088	173.996	126.671	130.181	5.24146e-07	1.49963e-05	0.631423	-0.663321	-1.58372	100.77	159.592	-1.74459	-1.43769
LTB4R	14	24311450	24318037	6587	+	13.7108	3.14259	2.22259	2.28513	0.00627737	0.0182378	0.649882	-0.62175	-1.53874	1.8002	2.77005	-2.03952	-1.16092
LTBP1	2	32946953	33399510	452557	+	36.675	8.87636	5.721	6.11251	3.38442e-05	0.000317624	0.497775	-1.00644	-2.00894	4.0629	8.16212	-2.53158	-1.5942
LTBP2	14	74498183	74612379	114196	-	12.279	2.76356	1.96532	2.04649	0.00346264	0.0113243	1.67711	0.745976	1.67711	2.5641	1.52888	1.23075	2.28535
LYAR	4	4267701	4290155	22454	-	126.792	28.7075	20.0443	21.1319	2.5567e-07	9.42773e-06	0.522776	-0.935735	-1.91286	14.5094	27.7545	-2.17374	-1.68329
LYST	1	235661041	235883641	222600	-	142.08	32.1487	23.069	23.6801	3.21038e-05	0.000304671	1.54843	0.630808	1.54843	28.7761	18.584	1.34479	1.78292
LZTS1	8	20246165	20303964	57799	-	351.614	85.387	55.832	58.6023	1.16956e-05	0.000142336	1.79961	0.847687	1.79961	75.34	41.8646	1.51997	2.13071
LZTS3	20	3162617	3173593	10976	-	20.6422	6.16127	2.84766	3.44037	9.69803e-07	2.25117e-05	3.46414	1.7925	3.46414	5.3394	1.54133	2.62104	4.57844
MACROD2	20	13995369	16053198	2057829	+	34.0695	7.85028	5.46507	5.67826	0.000107122	0.000754649	1.71051	0.774428	1.71051	7.16671	4.1898	1.39975	2.09027
MAFB	20	40685848	40689237	3389	-	24.5364	6.03016	3.78821	4.0894	5.41861e-06	8.06712e-05	2.19613	1.13496	2.19613	5.61983	2.55897	1.77842	2.71194
MAGED2	X	54807599	54816016	8417	+	289.16	66.5608	46.2245	48.1933	1.96626e-06	3.74207e-05	1.75173	0.808777	1.75173	61.3589	35.0277	1.53012	2.00543
MAGED4	X	52184823	52192269	7446	+	51.7117	12.4386	8.0593	8.61862	0.000221293	0.0013257	1.91972	0.940897	1.91972	11.3335	5.90372	1.45729	2.5289
MAGED4B	X	52061827	52069249	7422	-	61.0836	14.5192	9.71058	10.1806	1.07227e-05	0.000133128	1.82446	0.867471	1.82446	13.1523	7.20888	1.53521	2.16821
MAGI2	7	78017055	79453668	1436613	-	64.2242	15.3496	10.3364	10.704	0.000291502	0.00162811	1.61781	0.69404	1.61781	13.2302	8.17786	1.32068	1.98178
MAK16	8	33485182	33501263	16081	+	366.517	82.8095	58.218	61.0861	7.44507e-08	4.18277e-06	0.539754	-0.889625	-1.85269	42.8269	79.3453	-2.06325	-1.66362
MAN1C1	1	25617468	25786208	168740	+	6.47273	1.47309	1.03862	1.07879	0.016294	0.0394397	1.63831	0.712211	1.63831	1.33979	0.817787	1.11849	2.39972
MAN2B2	4	6575189	6623363	48174	+	28.4065	6.53651	4.59102	4.73441	0.000703344	0.00322875	1.59763	0.675929	1.59763	5.82364	3.64519	1.28361	1.98846
MAOA	X	43654907	43746825	91918	+	169.643	34.7017	27.6398	28.2739	2.13e-06	3.9814e-05	1.53076	0.61425	1.53076	34.2036	22.3442	1.37993	1.69808
MAP1A	15	43510958	43531621	20663	+	1315.25	281.756	213.66	219.209	8.76851e-06	0.000113446	1.53547	0.618682	1.53547	265.504	172.913	1.35954	1.73417
MAP1B	5	72107234	72209566	102332	+	15235.5	3254.17	2449.01	2539.26	7.55781e-09	8.81723e-07	1.71428	0.777601	1.71428	3207.48	1871.04	1.58984	1.84845
MAP1LC3B	16	87383953	87404780	20827	+	372.253	78.3578	60.2249	62.0421	6.89942e-08	3.95635e-06	1.63132	0.706042	1.63132	76.9277	47.1566	1.49899	1.77534
MAP2K1P1	8	30027713	30028901	1188	+	11.0529	2.49496	1.78662	1.84215	0.0115035	0.0298345	1.54077	0.623653	1.54077	2.23423	1.45008	1.12131	2.11715
MAP3K12	12	53479669	53500064	20395	-	81.0282	17.5465	12.9655	13.5047	1.63511e-06	3.26351e-05	1.76939	0.823248	1.76939	17.2565	9.75285	1.54524	2.02604
MAP3K13	3	185282941	185489095	206154	+	479.232	99.254	77.874	79.8721	1.05556e-06	2.40893e-05	1.55627	0.63809	1.55627	97.253	62.4912	1.40742	1.72085
MAP3K14-AS1	17	45247916	45269825	21909	+	16.1464	3.73837	2.52702	2.69106	0.00119807	0.0048777	1.87073	0.903605	1.87073	3.5073	1.87482	1.34515	2.60168
MAP3K21	1	233327724	233385149	57425	+	16.2265	4.13562	2.49023	2.70442	3.04692e-05	0.00029248	0.445954	-1.16503	-2.24239	1.66817	3.74067	-2.91113	-1.72726
MAP6	11	75586918	75669121	82203	-	333.59	81.9353	50.6018	55.5983	1.75551e-09	4.24238e-07	2.40182	1.26413	2.40182	78.5092	32.6874	2.15884	2.67214
MAPK10	4	85990007	86594626	604619	-	238.961	55.9035	36.7942	39.8268	1.58361e-09	3.89655e-07	2.23756	1.16193	2.23756	55.0507	24.603	2.03071	2.46548
MAPK11	22	50263713	50270768	7055	-	8.7986	2.39371	1.31894	1.46643	0.000123805	0.000847901	2.47783	1.30908	2.47783	2.08956	0.843304	1.7543	3.49977
MAPK4	18	50560087	50731827	171740	+	74.0537	16.8491	11.7529	12.3423	1.7233e-06	3.37015e-05	1.86336	0.897908	1.86336	16.0637	8.62083	1.60658	2.16119
MAPK8IP1	11	45885651	45906466	20815	+	69.7241	20.2078	10.2158	11.6207	1.15994e-06	2.56746e-05	2.71273	1.43974	2.71273	16.9814	6.25991	2.16051	3.40609
MAPKAPK3	3	50611520	50649292	37772	+	62.6724	14.5698	9.95189	10.4454	3.29884e-05	0.000311319	0.552401	-0.856211	-1.81028	7.43371	13.4571	-2.19859	-1.49055
MAPRE3	2	26970637	27027220	56583	+	62.9065	15.2824	9.81659	10.4844	2.17612e-06	4.02314e-05	2.04592	1.03275	2.04592	14.0846	6.88424	1.71698	2.43786
MAPT	17	45894382	46028335	133953	+	134.501	28.9536	21.6937	22.4168	8.47919e-07	2.05275e-05	1.66902	0.738999	1.66902	28.0359	16.7978	1.48998	1.86956
MARCHF11	5	16067139	16180763	113624	-	44.1369	9.3444	7.1824	7.35615	0.000480125	0.00237831	1.51265	0.597074	1.51265	8.85699	5.8553	1.25656	1.82092
MARCHF4	2	216257865	216372484	114619	-	63.7949	16.8475	9.70289	10.6325	3.15233e-07	1.06314e-05	2.35327	1.23466	2.35327	14.9234	6.34156	1.98363	2.79178
MARK4	19	45079288	45305285	225997	+	119.393	26.3299	19.3404	19.8988	9.80853e-05	0.000703066	1.5595	0.641086	1.5595	24.2487	15.549	1.32365	1.83738
MARS2	2	197705369	197708396	3027	+	111.18	24.4259	17.7766	18.5299	9.42909e-07	2.20662e-05	0.563634	-0.82717	-1.7742	13.3587	23.7011	-2.01804	-1.55983
MAST4	5	66596361	67169596	573235	+	25.3208	5.43176	4.1079	4.22014	0.000453917	0.00228206	1.58084	0.660693	1.58084	5.16992	3.27036	1.28892	1.93888
MATN2	8	97868840	98036725	167885	+	17.68	4.30385	2.82671	2.94666	0.00135011	0.00535765	1.70779	0.772132	1.70779	3.71689	2.17643	1.30139	2.24111
MCF2L	13	112894378	113099743	205365	+	48.5527	11.3698	7.42644	8.09211	4.31883e-07	1.31934e-05	2.29893	1.20097	2.29893	11.2783	4.9059	1.93357	2.73334
MCHR1	22	40678750	40682815	4065	+	16.1666	4.55717	2.25516	2.69443	3.34554e-06	5.63825e-05	3.30914	1.72646	3.30914	4.1383	1.25056	2.4355	4.49617
MCRIP1	17	81822361	81833303	10942	-	39.9171	10.8634	6.3636	6.65284	0.00959547	0.0258008	1.58771	0.666943	1.58771	8.1638	5.14189	1.17266	2.14965
MDFI	6	41636882	41654247	17365	+	19.1349	4.74082	2.95802	3.18915	2.07434e-05	0.000220081	0.461243	-1.1164	-2.16805	2.01332	4.36499	-2.75505	-1.70612
MDGA1	6	37630679	37699307	68628	-	32.9276	8.33172	5.06499	5.48793	1.55882e-05	0.000178021	2.18243	1.12593	2.18243	7.52697	3.4489	1.72966	2.75371
MDN1	6	89642498	89819795	177297	-	833.998	192.5	134.441	139	9.08669e-07	2.15737e-05	0.604789	-0.725496	-1.65347	104.768	173.231	-1.84912	-1.47852
MEGF8	19	42325609	42378770	53161	+	136.835	30.8869	22.1806	22.8059	0.000196368	0.00121567	1.53699	0.620112	1.53699	27.6331	17.9786	1.29581	1.82307
MEIOC	17	44656404	44690309	33905	+	161.903	37.2733	25.9051	26.9838	5.94204e-06	8.5368e-05	0.576606	-0.794341	-1.73429	19.7373	34.2302	-2.01449	-1.49306
MEIS3	19	47403124	47419528	16404	-	72.2067	18.3109	11.3639	12.0345	0.00023237	0.00137083	1.83623	0.876751	1.83623	15.5827	8.48622	1.43301	2.35291
METTL1	12	57768471	57772120	3649	-	74.8508	16.9976	11.8695	12.4751	0.000425485	0.00217361	0.575858	-0.796214	-1.73654	9.11746	15.8328	-2.23109	-1.35161
METTL25	12	82358528	82479240	120712	+	24.3662	5.80408	3.94064	4.06103	0.0021251	0.00771245	0.640547	-0.642625	-1.56117	3.17123	4.95082	-1.98984	-1.22484
MFNG	22	37469063	37486394	17331	-	6.64773	1.71419	1.04605	1.10795	0.0134597	0.0338004	0.562612	-0.829788	-1.77742	0.797829	1.41808	-2.70887	-1.16626
MFSD6	2	190408355	190509206	100851	+	92.14	20.9631	14.7607	15.3567	2.14075e-06	3.99596e-05	1.74922	0.806711	1.74922	19.5417	11.1717	1.52702	2.00376
MGAT4B	5	179797597	179806953	9356	-	56.8301	13.1189	9.18704	9.47169	0.00180738	0.00678293	1.51775	0.601938	1.51775	11.4195	7.52392	1.20864	1.90592
MGMT	10	129467190	129770984	303794	+	16.2535	3.86671	2.61598	2.70891	0.00755808	0.0211646	1.5761	0.656361	1.5761	3.31472	2.10311	1.16985	2.12343
MGP	12	14880864	14885858	4994	-	148.771	40.1851	21.0844	24.7952	3.17841e-09	5.79487e-07	3.18528	1.67142	3.18528	37.7416	11.8487	2.74317	3.69865
MGST1	12	16347142	16609260	262118	+	32.2618	8.30424	4.73625	5.37697	3.2256e-07	1.07438e-05	0.360757	-1.4709	-2.77195	2.85103	7.90292	-3.40374	-2.25743
MICAL1	6	109444062	109465969	21907	-	107.587	24.9579	17.4564	17.9312	0.000203719	0.00125087	1.53121	0.614674	1.53121	21.6943	14.1681	1.29234	1.81424
MICAL2	11	12094008	12359145	265137	+	14.3062	3.67124	2.13983	2.38436	0.000514468	0.00251165	0.436342	-1.19647	-2.29178	1.44867	3.32004	-3.39228	-1.5483
MICALL1	22	37905657	37942823	37166	+	59.5754	13.7634	9.6123	9.92924	0.00172149	0.00652025	1.54043	0.623336	1.54043	12.0415	7.81697	1.22074	1.94386
MIEF2	17	18260597	18266553	5956	+	8.31249	1.9334	1.30536	1.38542	0.000994461	0.00424276	1.95854	0.969781	1.95854	1.83428	0.936552	1.40186	2.73628
MIPEP	13	23730189	23889401	159212	-	46.842	11.8015	7.41051	7.807	0.000293771	0.00163672	0.556161	-0.846426	-1.79804	5.58033	10.0337	-2.29449	-1.40901
MIR17HG	13	91347820	91354580	6760	+	15.9396	4.0852	2.20314	2.6566	0.000316362	0.00173333	0.338042	-1.56472	-2.95821	1.34232	3.97087	-4.88424	-1.79168
MITF	3	69739435	69968338	228903	+	45.7322	10.1894	7.17293	7.62204	6.52618e-06	9.11442e-05	0.503525	-0.989866	-1.986	5.10518	10.1389	-2.40014	-1.64332
MKNK2	19	2037465	2051245	13780	-	56.9196	12.2904	9.25701	9.4866	0.000332634	0.00179989	1.51292	0.59734	1.51292	11.423	7.55025	1.26507	1.80934
MLLT11	1	151060397	151069545	9148	+	5618.74	1236.64	894.211	936.457	2.00764e-09	4.49205e-07	1.84011	0.87979	1.84011	1213.46	659.452	1.70688	1.98374
MMD2	7	4905989	4959214	53225	-	14.3936	3.48841	2.29375	2.39894	0.00135975	0.00538799	1.74803	0.805726	1.74803	3.05194	1.74594	1.30938	2.33361
MMP15	16	58025754	58046902	21148	+	17.4176	4.64923	2.74049	2.90294	0.000856153	0.00376668	1.87027	0.903245	1.87027	3.78311	2.02276	1.39306	2.51094
MMP24OS	20	35201745	35278132	76387	-	21.3008	5.38973	3.38395	3.55014	0.00274299	0.00940723	1.70332	0.768349	1.70332	4.47377	2.6265	1.25964	2.30327
MOB3A	19	2071036	2096674	25638	-	58.4091	14.5919	9.31164	9.73486	0.000148145	0.000974172	1.74093	0.799854	1.74093	12.3664	7.10334	1.41075	2.14838
MOB3B	9	27325209	27529815	204606	-	11.9095	3.75036	1.67981	1.98492	3.78923e-05	0.000347659	0.325315	-1.62009	-3.07394	0.97445	2.9954	-4.46461	-2.11644
MOB3C	1	46607715	46616892	9177	-	6.65247	1.49509	1.07005	1.10875	0.0159416	0.0386904	1.61056	0.687564	1.61056	1.36806	0.849431	1.10698	2.34323
MORC4	X	106813871	107000213	186342	-	65.9496	14.071	10.7023	10.9916	6.22075e-05	0.000500508	0.638417	-0.647429	-1.56637	8.56585	13.4173	-1.83305	-1.33849
MOSPD3	7	100612102	100615385	3283	+	12.7058	3.08418	2.0336	2.11764	0.00647207	0.0187068	1.64963	0.722138	1.64963	2.63684	1.59845	1.19783	2.27182
MPP2	17	43875357	43909712	34355	-	303.926	68.1263	49.1385	50.6544	2.0534e-05	0.000218636	1.59126	0.670174	1.59126	62.2125	39.0963	1.37835	1.83706
MPP3	17	43800799	43833171	32372	-	101.066	22.1411	16.4517	16.8443	4.5436e-05	0.000395934	1.52146	0.605455	1.52146	20.3278	13.3607	1.32072	1.75271
MPPED2	11	30384493	30586873	202380	-	160	35.4794	25.8205	26.6667	6.25944e-06	8.86178e-05	1.63787	0.711823	1.63787	33.1151	20.2184	1.4315	1.874
MPZ	1	161304735	161309973	5238	-	10.1803	3.17624	1.51863	1.69671	0.00388102	0.0123843	2.22764	1.15552	2.22764	2.34206	1.05136	1.41025	3.5188
MRAP2	6	84033772	84090882	57110	+	31.5116	7.01032	5.07947	5.25194	0.00036731	0.00194138	0.612916	-0.706238	-1.63154	3.99153	6.51235	-2.02156	-1.31677
MRAS	3	138347648	138405535	57887	+	207.865	46.1228	33.3938	34.6441	2.23697e-07	8.64142e-06	1.71857	0.781205	1.71857	43.8011	25.487	1.54732	1.90877
MRRF	9	122264603	122331338	66735	+	174.217	36.6651	28.2922	29.0362	1.28096e-06	2.74539e-05	0.634521	-0.65626	-1.57599	22.5437	35.5287	-1.75076	-1.41867
MRTFA	22	40410281	40636720	226439	-	69.0169	15.536	11.0711	11.5028	4.92045e-05	0.000418269	1.69377	0.760242	1.69377	14.4653	8.5403	1.41526	2.0271
MRTO4	1	19251805	19260129	8324	+	124.92	27.3854	20.0444	20.8199	1.74482e-05	0.000193193	0.591447	-0.75768	-1.69077	15.4751	26.1648	-1.98727	-1.4385
MSRB2	10	23095579	23122014	26435	+	70.605	15.7654	11.3435	11.7675	5.55132e-06	8.19258e-05	1.71385	0.777245	1.71385	14.8628	8.67216	1.48319	1.98039
MTAP	9	21802636	21937652	135016	+	361.803	82.8941	57.4284	60.3005	3.03922e-07	1.04578e-05	0.540829	-0.886755	-1.84901	42.3308	78.2702	-2.09128	-1.63481
MTHFD1L	6	150865549	151101888	236339	+	291.449	68.2862	46.4353	48.5748	5.91579e-07	1.6076e-05	0.554863	-0.849796	-1.80225	34.6685	62.4812	-2.04422	-1.58891
MTHFD2P7	3	179464346	179465329	983	+	18.6913	4.33361	3.01218	3.11522	0.00110088	0.004586	0.610125	-0.712822	-1.63901	2.3609	3.86954	-2.0986	-1.28006
MTMR9	8	11284816	11328147	43331	+	602.737	128.443	97.9352	100.456	5.23789e-07	1.49963e-05	1.56035	0.641866	1.56035	122.442	78.4708	1.42026	1.71425
MTND1P23	1	629062	629434	372	+	6.4199	1.6066	1.0156	1.06998	0.0210338	0.0485061	1.72101	0.783254	1.72101	1.35351	0.786461	1.12705	2.62798
MTRR	5	7851186	7906026	54840	+	156.541	32.6154	25.4811	26.0901	2.33055e-06	4.24486e-05	0.647713	-0.626573	-1.54389	20.512	31.6683	-1.71766	-1.3877
MVB12B	9	126326829	126507042	180213	+	151.724	33.833	24.6134	25.2873	1.87515e-05	0.000203827	1.56336	0.644652	1.56336	30.8449	19.7298	1.36326	1.79284
MVK	12	109573255	109598126	24871	+	22.1357	4.74129	3.56946	3.68929	0.0058335	0.0171955	1.53015	0.613676	1.53015	4.46232	2.91626	1.14872	2.03825
MVP	16	29820394	29848040	27646	+	25.8281	6.52839	3.95074	4.30468	0.000143619	0.000949486	2.15063	1.10476	2.15063	5.87678	2.73258	1.58755	2.91343
MXD1	2	69897688	69942946	45258	+	160.058	35.0848	25.6621	26.6763	2.92212e-07	1.02448e-05	1.74501	0.803234	1.74501	33.9164	19.4363	1.56169	1.94985
MYADM	19	53864763	53876436	11673	+	137.928	30.1964	22.1971	22.988	1.08505e-06	2.44195e-05	1.69271	0.759333	1.69271	28.9018	17.0743	1.50215	1.90744
MYBBP1A	17	4538897	4555632	16735	-	61.8163	14.3619	9.89728	10.3027	0.000120497	0.000829445	0.590311	-0.760453	-1.69402	7.64857	12.9569	-2.07286	-1.38442
MYCL	1	39895426	39902257	6831	-	17.9535	4.18606	2.77943	2.99225	5.53976e-05	0.000457689	0.47142	-1.08491	-2.12125	1.91734	4.06717	-2.76015	-1.63024
MYCN	2	15940550	15947008	6458	+	4114.64	1018.78	634.505	685.774	1.53267e-08	1.35566e-06	0.45645	-1.13147	-2.19082	429.842	941.706	-2.46397	-1.94795
MYCT1	6	152697895	152724568	26673	+	69.9315	14.9047	11.318	11.6553	1.74472e-05	0.000193193	1.61454	0.691125	1.61454	14.3948	8.91571	1.39529	1.86825
MYL6	12	56158346	56163497	5151	+	1162.03	299.124	178.183	193.672	6.18115e-08	3.71776e-06	2.24372	1.1659	2.24372	267.931	119.413	1.95569	2.57418
MYLK	3	123610049	123884332	274283	-	78.3347	16.6611	12.6265	13.0558	1.0638e-05	0.000132199	1.66301	0.733795	1.66301	16.3063	9.80529	1.43539	1.92672
MYO19	17	36495633	36543436	47803	-	59.4831	12.9304	9.63153	9.91385	0.000220532	0.00132349	0.638246	-0.647816	-1.56679	7.72469	12.103	-1.88486	-1.3024
MYO5A	15	52307283	52529051	221768	-	328.609	71.879	53.4136	54.7682	1.60541e-06	3.21392e-05	1.55315	0.635193	1.55315	66.6338	42.9025	1.39996	1.72309
MYORG	9	34366666	34376899	10233	-	35.2344	8.38109	5.62198	5.87239	0.00027794	0.00157144	1.73297	0.793245	1.73297	7.44734	4.29745	1.37797	2.17943
MYRF	11	61752642	61788519	35877	+	42.9954	10.3571	6.92468	7.16591	0.00187043	0.00698856	1.56242	0.643778	1.56242	8.73873	5.59309	1.22606	1.99105
MYT1	20	64102394	64242254	139860	+	131.817	30.4359	20.5957	21.9694	1.42525e-07	6.34473e-06	2.0486	1.03464	2.0486	29.5261	14.4128	1.79254	2.34124
MYZAP	15	57591904	57685365	93461	+	11.0847	2.6476	1.75499	1.84745	0.000692287	0.00318773	1.87177	0.904407	1.87177	2.40827	1.28662	1.39428	2.5128
NACAD	7	45080437	45088970	8533	-	46.1925	15.3745	6.10364	7.69875	1.08627e-06	2.44195e-05	3.86742	1.95137	3.86742	12.2341	3.16338	2.8413	5.2641
NAGK	2	71064344	71079809	15465	+	46.4915	10.6915	7.39596	7.74858	2.58861e-05	0.000258331	1.81158	0.857248	1.81158	9.98526	5.51191	1.50052	2.18712
NANOS1	10	119029714	119033731	4017	+	170.784	36.2875	27.5212	28.4639	9.54302e-07	2.219e-05	1.67326	0.742665	1.67326	35.6326	21.2953	1.49037	1.8786
NAP1L4P3	13	47763460	47764607	1147	+	31.4274	6.69563	5.11029	5.2379	0.000481979	0.00238487	0.649549	-0.62249	-1.53953	4.12509	6.3507	-1.87033	-1.26724
NAP1L5	4	88695913	88697830	1917	-	278.749	68.0204	43.1596	46.4582	1.52774e-08	1.35566e-06	2.15767	1.10947	2.15767	63.4907	29.4256	1.92339	2.42048
NAPB	20	23374519	23421520	47001	-	427.73	89.2896	69.5854	71.2884	5.2714e-07	1.50185e-05	1.54692	0.6294	1.54692	86.5967	55.98	1.41051	1.69653
NAT10	11	34105617	34147671	42054	+	384.159	90.4273	60.7312	64.0265	2.03274e-07	8.13876e-06	0.526775	-0.924741	-1.89834	44.1814	83.8715	-2.14775	-1.6779
NATD1	17	21238870	21253411	14541	-	29.57	7.273	4.75213	4.92833	0.00104797	0.00441398	1.63357	0.708029	1.63357	6.11396	3.7427	1.28504	2.07663
NAV1	1	201622885	201826970	204085	+	1153.92	265.55	181.739	192.32	3.32879e-08	2.36493e-06	1.94935	0.96299	1.94935	254.224	130.415	1.75002	2.17138
NAV2-AS1	11	20119684	20120633	949	-	44.9359	9.84321	7.21478	7.48932	0.00111725	0.00463084	1.59828	0.676523	1.59828	9.21382	5.76482	1.25177	2.04071
NBEAL1	2	203014879	203226379	211500	+	345.829	76.9945	55.4214	57.6381	3.5091e-06	5.82683e-05	0.583209	-0.777916	-1.71465	42.4645	72.8118	-1.96877	-1.49333
NBPF19	1	149475338	149556362	81024	+	18.9205	4.6104	2.97253	3.15342	0.000903188	0.0039365	0.540722	-0.887041	-1.84938	2.21341	4.09344	-2.51705	-1.35881
NBPF8	1	120419850	120467740	47890	+	50.4278	10.7344	8.13193	8.40463	7.70034e-05	0.000583476	0.609375	-0.714597	-1.64102	6.36468	10.4446	-1.96399	-1.37117
NCAM1	11	112961247	113278437	317190	+	1741.17	378.089	277.71	290.195	8.95915e-10	3.4428e-07	1.81724	0.861745	1.81724	374.376	206.014	1.6975	1.94541
NCAM2	21	20998409	21543330	544921	+	47.1599	11.0015	7.26642	7.85998	8.04607e-07	1.97977e-05	2.21165	1.14512	2.21165	10.8253	4.89467	1.85531	2.63643
NCAN	19	19211958	19252234	40276	+	468.926	105.457	73.9829	78.1544	4.69392e-09	6.719e-07	1.94595	0.960473	1.94595	103.25	53.0589	1.78043	2.12686
NCKAP5	2	132671788	133568464	896676	-	31.4501	7.90243	4.74101	5.24168	1.64786e-06	3.27949e-05	0.407914	-1.29366	-2.4515	3.03734	7.44602	-3.03219	-1.98202
NCL	2	231453531	231483642	30111	-	7586.03	1583.36	1227.08	1264.34	5.87958e-09	7.6508e-07	0.611874	-0.708694	-1.63432	959.895	1568.78	-1.74757	-1.52842
NCOA1	2	24491914	24770703	278789	+	654.036	134.133	106.469	109.006	1.74552e-07	7.29078e-06	1.54156	0.624395	1.54156	132.233	85.7787	1.42015	1.67336
NDRG1	8	133237171	133302023	64852	-	38.3465	9.16596	5.92779	6.39108	1.35243e-05	0.000159152	2.12399	1.08678	2.12399	8.69055	4.09161	1.69622	2.65964
NDRG4	16	58462846	58513629	50783	+	414.107	99.7496	63.6055	69.0179	8.59284e-10	3.4202e-07	2.26274	1.17807	2.26274	95.7291	42.3067	2.06223	2.48275
NDUFA6-DT	22	42090931	42137743	46812	+	6.44383	1.74928	1.02046	1.07397	0.0114106	0.0296505	1.76793	0.822061	1.76793	1.37193	0.77601	1.18759	2.63188
NEDD4L	18	58044226	58401541	357315	+	542.337	113.061	88.1263	90.3896	2.07404e-07	8.23108e-06	1.56595	0.647037	1.56595	110.326	70.4531	1.43632	1.70728
NEDD9	6	11183298	11382349	199051	-	110.095	27.4347	16.6598	18.3491	1.41047e-08	1.2985e-06	2.43133	1.28175	2.43133	26.0032	10.695	2.13146	2.77339
NEK2P4	2	131177618	131178947	1329	-	6.60195	1.59368	1.05815	1.10032	0.0163308	0.0395134	0.611194	-0.710298	-1.63614	0.834799	1.36585	-2.40528	-1.11295
NEK6	9	124257606	124353308	95702	+	62.9992	13.1127	10.2004	10.4999	1.48519e-05	0.000170621	0.618732	-0.692614	-1.61621	8.02678	12.973	-1.86598	-1.39987
NELL1	11	20669551	21575687	906136	+	82.9656	18.3664	13.2325	13.8276	1.41552e-06	2.92948e-05	1.80685	0.853474	1.80685	17.8024	9.85277	1.57336	2.07498
NETO1	18	72742314	72868147	125833	-	71.7679	16.3834	11.3476	11.9613	2.42163e-06	4.37626e-05	0.526454	-0.925621	-1.8995	8.25061	15.672	-2.2262	-1.62074
NEURL1B	5	172641263	172691541	50278	+	82.9664	18.3024	13.4292	13.8277	9.37504e-05	0.0006781	1.5803	0.660199	1.5803	16.9375	10.7179	1.3373	1.86746
NFASC	1	204828651	205022823	194172	+	197.871	43.6835	31.8837	32.9785	8.93425e-06	0.000114931	1.64631	0.719233	1.64631	41.0328	24.9242	1.42927	1.8963
NFKB1	4	102501331	102617303	115972	+	66.5274	13.808	10.8351	11.0879	5.60667e-05	0.000461808	0.655227	-0.609933	-1.52619	8.77836	13.3974	-1.76773	-1.31765
NHLH1	1	160367071	160372847	5776	+	136.462	30.5647	21.5546	22.7437	1.26915e-07	5.86192e-06	1.9274	0.946655	1.9274	29.9489	15.5385	1.70834	2.17455
NHS	X	17375420	17735995	360575	+	78.9985	17.8494	12.7189	13.1664	5.39247e-06	8.03703e-05	1.6859	0.753518	1.6859	16.5287	9.80411	1.46608	1.93868
NICN1	3	49422333	49429327	6994	-	23.0572	5.37882	3.66046	3.84287	7.46362e-05	0.000571296	1.85163	0.888798	1.85163	4.99053	2.69521	1.48479	2.30911
NIP7	16	69337996	69343107	5111	+	356.409	75.4679	57.4809	59.4015	8.46622e-08	4.43967e-06	0.598758	-0.739955	-1.67012	44.4935	74.3096	-1.82841	-1.52554
NIPAL3	1	24415802	24472977	57175	+	11.0428	2.40114	1.77999	1.84046	0.021722	0.0496645	1.50513	0.58989	1.50513	2.21157	1.46936	1.06275	2.13166
NISCH	3	52455118	52493069	37951	+	174.216	38.009	28.2098	29.036	8.65606e-05	0.000638726	1.5594	0.640989	1.5594	35.3822	22.6897	1.32723	1.83218
NKX2-4	20	21395365	21397527	2162	-	11.6166	2.476	1.88389	1.9361	0.00424848	0.0133151	0.634729	-0.655788	-1.57548	1.50349	2.36872	-2.08289	-1.19168
NLE1	17	35128730	35142305	13575	-	96.1129	19.5996	15.6415	16.0188	7.93936e-05	0.000595584	0.659837	-0.599819	-1.51553	12.736	19.3017	-1.76362	-1.30234
NLGN3	X	71144831	71171202	26371	+	28.4924	7.64125	4.39409	4.74874	4.89717e-05	0.000417601	2.12859	1.0899	2.12859	6.46177	3.0357	1.6503	2.74549
NLRP1	17	5499427	5619425	119998	-	9.37889	2.4223	1.47302	1.56315	0.00153295	0.0059428	1.90934	0.933077	1.90934	2.05173	1.07457	1.35907	2.68242
NME1-NME2	17	51153590	51171745	18155	+	361.085	94.1762	57.3881	60.1808	0.00538456	0.0160859	0.634904	-0.655389	-1.57504	46.7416	73.62	-2.10605	-1.17792
NMRK1	9	75060573	75088218	27645	-	14.6741	3.21659	2.35481	2.44568	0.00102111	0.00433053	1.70107	0.76644	1.70107	3.08046	1.8109	1.3041	2.21887
NOB1	16	69741871	69754927	13056	-	105.465	22.2732	16.9898	17.5776	1.9681e-05	0.000211719	0.605865	-0.722932	-1.65053	13.2634	21.8917	-1.92946	-1.41193
NOC3L	10	94333226	94362960	29734	-	468.048	108.178	74.2018	78.008	6.81841e-08	3.92851e-06	0.53371	-0.905872	-1.87368	54.2914	101.725	-2.08831	-1.68111
NOL4L	20	32443059	32585075	142016	-	194.557	45.255	30.0546	32.4262	3.77014e-09	6.27346e-07	2.19874	1.13668	2.19874	44.5781	20.2744	1.98343	2.43742
NOL6	9	33461353	33473931	12578	-	196.961	44.9361	31.6136	32.8268	5.14344e-06	7.74807e-05	0.589006	-0.763647	-1.69778	24.3362	41.3174	-1.95654	-1.47324
NOLC1	10	102152176	102163872	11696	+	2559.15	554.988	408.778	426.524	9.4128e-10	3.4428e-07	0.556031	-0.846763	-1.79846	304.828	548.221	-1.92363	-1.68143
NOM1	7	156949712	156973177	23465	+	239.095	50.2714	38.9094	39.8491	8.72603e-07	2.0975e-05	0.646592	-0.629073	-1.54657	31.2963	48.4019	-1.70392	-1.40375
NOP14	4	2937933	2963407	25474	-	273.354	60.7643	43.6441	45.5591	4.07874e-08	2.71909e-06	0.555629	-0.847806	-1.79976	32.545	58.5732	-1.9819	-1.63436
NOP14-AS1	4	2934882	2961739	26857	+	29.122	6.36724	4.72027	4.85366	0.00293268	0.00991209	1.51082	0.595332	1.51082	5.84113	3.8662	1.18496	1.92629
NOP16	5	176383938	176388928	4990	-	52.3817	11.9707	8.27828	8.73028	1.80666e-06	3.49779e-05	0.519825	-0.943902	-1.92372	5.97203	11.4885	-2.24956	-1.64508
NOVA1	14	26443090	26598034	154944	-	53.8347	12.0053	8.58317	8.97244	1.6129e-05	0.000182656	1.78902	0.839169	1.78902	11.5108	6.43412	1.49968	2.13418
NPC2	14	74476192	74494178	17986	-	15.6677	3.33314	2.51462	2.61128	0.000520698	0.00253749	1.72088	0.783151	1.72088	3.30312	1.91943	1.34353	2.20422
NPIPB12	16	29483642	29506000	22358	-	24.917	6.85377	3.95749	4.15284	0.00259568	0.00900702	0.585574	-0.772078	-1.70773	3.0674	5.23828	-2.28242	-1.27774
NPIPB4	16	21834569	21880828	46259	-	18.8802	4.0697	3.01264	3.14669	0.000227681	0.00135141	0.560405	-0.835459	-1.78443	2.26021	4.03317	-2.26506	-1.40578
NPIPB5	16	22479121	22536522	57401	+	78.4062	16.4444	12.7372	13.0677	5.82827e-05	0.00047658	0.645833	-0.630766	-1.54839	10.2557	15.8797	-1.80404	-1.32896
NPL	1	182789293	182830385	41092	+	37.7167	8.761	5.92757	6.28612	3.43868e-06	5.75937e-05	0.502314	-0.993337	-1.99078	4.20366	8.36858	-2.3736	-1.66971
NPM1	5	171387116	171411138	24022	+	8389.27	1900.24	1327.8	1398.21	1.55556e-09	3.89655e-07	0.524364	-0.931361	-1.90707	961.938	1834.49	-2.06075	-1.76486
NPM1P12	7	149334024	149334858	834	+	7.25682	1.87168	1.15706	1.20947	0.00969074	0.0259641	0.583461	-0.777291	-1.71391	0.891313	1.52763	-2.48246	-1.1833
NPM1P21	8	56101199	56102268	1069	-	13.584	3.19364	2.10105	2.26401	5.19032e-05	0.000436548	0.460949	-1.11732	-2.16944	1.42865	3.09937	-2.83181	-1.66199
NPM1P24	10	72917641	72918535	894	-	209.482	47.9864	33.2729	34.9137	3.92062e-07	1.22531e-05	0.541478	-0.885026	-1.8468	24.5284	45.299	-2.09324	-1.62937
NPM1P27	5	93682838	93683668	830	-	4225.55	933.589	671.736	704.259	1.32601e-09	3.81279e-07	0.539101	-0.891372	-1.85494	493.362	915.156	-1.99583	-1.724
NPM1P39	1	27206930	27207797	867	+	472.617	111.776	74.5229	78.7694	2.55761e-08	1.9666e-06	0.514778	-0.957978	-1.94259	53.5376	104.001	-2.156	-1.7503
NPM1P46	2	197379701	197380893	1192	-	26.2083	6.59557	4.01692	4.36805	7.25989e-05	0.000561097	0.460799	-1.11779	-2.17014	2.75574	5.98035	-2.86559	-1.64348
NPM1P6	8	61202350	61203221	871	+	252.22	64.9471	39.6578	42.0367	6.0994e-07	1.64102e-05	0.51247	-0.96446	-1.95133	28.4866	55.5868	-2.24883	-1.69319
NPM3	10	101781325	101783414	2089	-	59.8179	13.4658	9.37741	9.96965	6.69529e-05	0.000531421	0.522252	-0.937181	-1.91478	6.84075	13.0985	-2.42444	-1.51227
NPR1	1	153678688	153693993	15305	+	8.9815	2.19032	1.37737	1.49692	0.000134554	0.000902513	0.440663	-1.18225	-2.26931	0.915739	2.07809	-3.10548	-1.65828
NPR2	9	35792154	35809733	17579	+	152.924	36.4567	23.6632	25.4874	1.07894e-06	2.43355e-05	2.11979	1.08392	2.11979	34.6356	16.3392	1.78361	2.51932
NPR3	5	32689070	32791725	102655	+	164.246	42.8602	23.4693	27.3743	1.29198e-09	3.80094e-07	0.322738	-1.63156	-3.09849	13.3583	41.3904	-3.5425	-2.71013
NPTX2	7	98617285	98629870	12585	+	85.624	20.0908	13.5584	14.2707	2.54404e-06	4.51817e-05	0.532508	-0.909125	-1.87791	9.91739	18.6239	-2.19455	-1.60695
NPY	7	24284188	24291863	7675	+	8.38925	2.57784	1.2656	1.39821	0.0206966	0.0478535	1.98633	0.990108	1.98633	1.86001	0.936405	1.1925	3.30863
NR2F2	15	96325938	96340264	14326	+	192.477	43.614	30.8807	32.0796	8.9569e-07	2.14158e-05	0.580083	-0.785668	-1.72389	23.5542	40.6049	-1.94603	-1.5271
NRARP	9	137299631	137302272	2641	-	29.9046	6.20589	4.85315	4.9841	0.00053322	0.00259105	0.641466	-0.640554	-1.55893	3.89546	6.07274	-1.91111	-1.27165
NRAV	12	120488079	120495947	7868	-	11.2064	2.40114	1.80239	1.86774	0.00722322	0.0204487	1.59965	0.677757	1.59965	2.29856	1.43691	1.15662	2.21237
NRBP2	8	143833583	143840974	7391	-	10.8419	2.76301	1.63751	1.80698	0.00221422	0.00794829	2.08712	1.06151	2.08712	2.4433	1.17066	1.34557	3.23733
NREP	5	111662621	111997465	334844	-	3781.65	791.703	612.023	630.275	5.81119e-09	7.63523e-07	1.62741	0.702575	1.62741	780.78	479.77	1.52296	1.73902
NRG1	8	31639222	32855667	1216445	+	252.683	52.3373	41.1649	42.1138	1.74627e-06	3.39057e-05	1.52687	0.610578	1.52687	50.8948	33.3327	1.3804	1.68888
NRM	6	30688047	30691421	3374	-	119.369	26.1851	19.3209	19.8948	9.16673e-05	0.000666595	1.5701	0.650859	1.5701	24.3079	15.4817	1.33153	1.85143
NRN1	6	5997999	6007606	9607	-	66.185	14.3761	10.7682	11.0308	0.000103165	0.000732876	0.654506	-0.611521	-1.52787	8.72738	13.3343	-1.78904	-1.30483
NRP1	10	33177492	33336263	158771	-	340.647	85.2735	49.9024	56.7745	4.58896e-11	7.54772e-08	2.8214	1.49641	2.8214	83.835	29.7139	2.57959	3.08588
NRXN1	2	49918503	51225576	1307073	-	273.639	62.0998	43.9173	45.6065	1.66828e-07	7.14458e-06	1.72851	0.789532	1.72851	57.7834	33.4295	1.5595	1.91585
NSG1	4	4348140	4419059	70919	+	135.132	34.4313	19.9453	22.5221	1.42992e-09	3.87022e-07	2.72773	1.4477	2.72773	32.9606	12.0835	2.42003	3.07454
NT5C2	10	103088017	103193307	105290	-	426.155	85.8318	69.5048	71.0259	2.31477e-07	8.77474e-06	1.5179	0.602081	1.5179	85.6351	56.4167	1.39944	1.6464
NTNG1	1	107140007	107483459	343452	+	8.38084	1.99342	1.33143	1.39681	0.00350984	0.0114427	1.77937	0.831363	1.77937	1.78849	1.00513	1.25837	2.51607
NTRK1	1	156815640	156881851	66211	+	78.1378	18.5966	12.4922	13.023	0.00111262	0.00461741	1.62012	0.696096	1.62012	16.1052	9.94076	1.26486	2.07515
NTRK3	15	87859751	88256769	397018	-	67.8617	18.1125	9.86102	11.3103	4.82153e-08	3.07782e-06	2.88168	1.52691	2.88168	16.7931	5.82752	2.41492	3.43867
NUDT10	X	51332231	51337526	5295	+	28.1059	6.61757	4.48331	4.68432	0.0006203	0.00292492	0.583337	-0.777598	-1.71427	3.45162	5.91702	-2.20752	-1.33124
NUDT11	X	51490011	51496593	6582	-	405.904	87.5623	66.0523	67.6507	3.31539e-06	5.6014e-05	0.653161	-0.61449	-1.53102	53.4573	81.844	-1.70565	-1.37426
NUFIP1	13	44939249	44989472	50223	-	228.357	48.2894	37.0833	38.0596	1.02215e-06	2.34852e-05	0.635608	-0.65379	-1.5733	29.5804	46.5387	-1.74294	-1.42017
NUTM2D	10	87357668	87370696	13028	+	31.3279	7.24377	5.08271	5.22131	0.00354172	0.0115161	1.50113	0.586047	1.50113	6.26746	4.17517	1.18537	1.901
NWD2	4	37244743	37449464	204721	+	13.6171	3.95877	1.7322	2.26951	3.37921e-06	5.68792e-05	4.37964	2.13081	4.37964	3.69529	0.843742	2.9766	6.44401
NXPH1	7	8433609	8752962	319353	+	30.5233	7.7135	4.6633	5.08721	8.76516e-06	0.000113446	0.441233	-1.18039	-2.26637	3.1149	7.05952	-2.86012	-1.79589
NYAP1	7	100483927	100494803	10876	+	7.26891	1.9334	1.05372	1.21148	3.83461e-05	0.000349924	2.91196	1.54199	2.91196	1.80359	0.619375	2.04011	4.15639
NYAP2	2	225399710	225654019	254309	+	11.7795	2.85402	1.87415	1.96325	0.00540435	0.0161379	1.69494	0.761237	1.69494	2.46951	1.45699	1.20833	2.37751
OCRL	X	129539849	129592562	52713	+	507.973	106.561	82.2007	84.6622	5.567e-07	1.5462e-05	1.61277	0.689537	1.61277	104.518	64.8065	1.45635	1.78598
ODC1	2	10439968	10448328	8360	-	3322.12	709.068	537.567	553.686	1.55916e-08	1.3613e-06	0.614934	-0.701498	-1.62619	421.665	685.708	-1.74897	-1.51203
OLFML3	1	113979391	114035573	56182	+	9.89218	2.6699	1.34118	1.6487	3.07736e-06	5.29173e-05	3.71912	1.89496	3.71912	2.59866	0.698731	2.66178	5.19646
OPTN	10	13099449	13138309	38860	+	84.7932	24.2959	10.3043	14.1322	9.35161e-11	9.03966e-08	5.316	2.41034	5.316	23.7893	4.47505	4.55533	6.20368
OR7D2	19	9178979	9188819	9840	+	8.54178	1.97943	1.33842	1.42363	0.0149255	0.036645	1.72122	0.783434	1.72122	1.80094	1.04632	1.11135	2.66578
ORAI2	7	102433106	102456826	23720	+	77.5113	19.4586	12.0929	12.9186	1.68162e-06	3.32132e-05	2.0477	1.03401	2.0477	17.3595	8.47757	1.72949	2.42447
OSBPL2	20	62231922	62296214	64292	+	112.191	23.7387	18.259	18.6984	5.95788e-05	0.000485418	1.51694	0.601164	1.51694	22.5388	14.8581	1.31218	1.75366
OSTF1	9	75088514	75147266	58752	+	13.6704	3.17624	2.18983	2.27841	0.0053305	0.0159561	1.64836	0.72103	1.64836	2.83619	1.72062	1.20946	2.24654
P2RX3	11	57338352	57372397	34045	+	174.057	47.7343	23.8812	29.0094	1.10716e-10	9.98879e-08	3.61428	1.85371	3.61428	45.4451	12.5738	3.20457	4.07637
P4HA1	10	73007217	73096975	89758	-	192.854	44.2891	30.5974	32.1424	1.24081e-07	5.79029e-06	0.534509	-0.903715	-1.87088	22.392	41.8928	-2.09771	-1.66857
PABPC1	8	100685816	100722810	36994	-	6500.5	1411.8	1045.62	1083.42	3.83665e-09	6.27346e-07	0.585749	-0.771647	-1.70722	800.392	1366.44	-1.83102	-1.59178
PABPC1P4	12	63822021	63823896	1875	+	27.1777	6.19018	4.22568	4.52962	6.38617e-06	8.97445e-05	0.473816	-1.0776	-2.11053	2.91245	6.14679	-2.58977	-1.71997
PABPC3	13	25095868	25099255	3387	+	215.803	47.106	34.5888	35.9671	4.46699e-07	1.34636e-05	0.574785	-0.798905	-1.73978	26.2555	45.6787	-1.95277	-1.55002
PABPC5	X	91434595	91438585	3990	+	14.7195	3.72784	2.34633	2.45324	0.0201274	0.0468175	1.58109	0.660918	1.58109	3.00555	1.90094	1.10584	2.26058
PACS1	11	66070272	66244745	174473	+	39.2115	9.66661	6.26696	6.53525	0.00341292	0.0111941	1.60969	0.686785	1.60969	8.06206	5.00844	1.21875	2.12604
PACS2	14	105300563	105398148	97585	+	46.4491	10.7714	7.50383	7.74152	0.00415411	0.0130708	1.50745	0.592113	1.50745	9.30824	6.17481	1.17678	1.93104
PAGE1	X	49687447	49695985	8538	-	20.9716	4.63996	3.40168	3.49527	0.0016282	0.00623146	0.642526	-0.638173	-1.55636	2.73457	4.25597	-1.96637	-1.23184
PAICS	4	56435741	56464580	28839	+	3921.65	831.388	633.319	653.608	6.46614e-09	8.12616e-07	0.604264	-0.726749	-1.65491	492.378	814.839	-1.77367	-1.54409
PAICSP4	8	4787332	4788585	1253	+	109.625	24.0078	17.696	18.2708	8.59029e-06	0.000111528	0.610185	-0.712682	-1.63885	13.8476	22.6941	-1.88421	-1.42544
PAK1IP1	6	10694972	10709783	14811	+	288.829	60.8525	46.7243	48.1381	1.399e-07	6.28994e-06	0.61293	-0.706206	-1.63151	36.586	59.6903	-1.7863	-1.49013
PAK3	X	110944285	111227362	283077	+	168.969	35.3478	27.4452	28.1615	2.68232e-06	4.69597e-05	1.56782	0.648762	1.56782	34.3888	21.9342	1.40121	1.75424
PALD1	10	70478767	70568451	89684	+	48.0552	11.0954	7.73603	8.0092	0.000102624	0.000730184	0.603914	-0.727585	-1.65587	6.03133	9.98707	-1.99709	-1.37294
PALM	19	708935	748330	39395	+	21.5886	6.21429	3.25059	3.5981	0.000129231	0.00087444	2.33284	1.22209	2.33284	5.03702	2.15918	1.70221	3.19709
PAQR5	15	69298912	69407781	108869	+	16.5366	4.4063	2.39324	2.75611	2.25193e-05	0.000233707	0.35725	-1.48499	-2.79916	1.4509	4.06131	-3.88831	-2.01509
PAQR8	6	52361421	52407778	46357	+	184.406	38.5932	29.8563	30.7344	4.86244e-07	1.42431e-05	1.6201	0.696082	1.6201	38.0083	23.4605	1.46422	1.79257
PARM1	4	74933095	75050116	117021	+	522.286	114.666	83.423	87.0477	9.69641e-09	1.04977e-06	1.79602	0.844805	1.79602	111.83	62.2654	1.65167	1.95299
PARP6	15	72241181	72273000	31819	-	593.525	127.166	96.1056	98.9209	2.42209e-06	4.37626e-05	1.59199	0.670833	1.59199	121.514	76.3281	1.41899	1.78608
PARP9	3	122527924	122564578	36654	-	203.155	45.5293	32.1947	33.8592	5.4097e-08	3.3277e-06	1.8894	0.917928	1.8894	44.2815	23.4368	1.69703	2.10357
PARVA	11	12377563	12535357	157794	+	45.8413	10.3501	7.32971	7.64021	3.92163e-05	0.000354459	1.75069	0.807927	1.75069	9.72531	5.55512	1.45348	2.10868
PAWR	12	79574979	79690965	115986	-	8.49696	2.63421	1.19566	1.41616	8.72004e-05	0.000642047	0.324285	-1.62467	-3.08371	0.693566	2.13875	-4.65899	-2.04105
PBLD	10	68282660	68333050	50390	-	30.3259	6.8416	4.90599	5.05432	0.000358674	0.00190668	1.60157	0.679489	1.60157	6.22305	3.88559	1.3064	1.96344
PCAT7	9	94555054	94603991	48937	+	48.4054	11.6033	7.70231	8.06757	6.24852e-05	0.000501916	1.78446	0.835485	1.78446	10.3404	5.79472	1.45519	2.18822
PCBD2	5	134905120	135007960	102840	+	68.2141	14.4063	11.0871	11.369	4.04785e-05	0.000362059	1.55409	0.636074	1.55409	13.8354	8.90258	1.34099	1.80107
PCBP3	21	45643694	45942455	298761	+	42.3785	9.43646	6.68305	7.06308	2.58989e-06	4.57559e-05	1.95199	0.964946	1.95199	9.34086	4.7853	1.65284	2.30529
PCBP4	3	51957454	51974017	16563	-	120.659	30.1044	19.2064	20.1098	8.55923e-05	0.000632962	1.75029	0.807595	1.75029	25.5959	14.6238	1.4353	2.13441
PCDH17	13	57631744	57729312	97568	+	36.044	10.1479	4.74371	6.00733	8.11744e-09	9.30961e-07	4.15255	2.054	4.15255	9.68287	2.33179	3.39813	5.07447
PCDH18	4	137518918	137532495	13577	-	49.857	11.3797	7.95259	8.3095	1.00186e-05	0.000125784	0.556194	-0.846339	-1.79793	5.93974	10.6793	-2.12744	-1.51946
PCDH8	13	52842889	52848642	5753	-	32.3759	7.09452	5.25537	5.39599	0.00252646	0.00882564	0.666408	-0.585523	-1.50058	4.31578	6.47619	-1.88825	-1.19251
PCDHA10	5	140855883	141012348	156465	+	23.9748	5.61229	3.84837	3.9958	0.00505531	0.0152982	1.56997	0.650735	1.56997	4.88199	3.10962	1.17136	2.10422
PCDHA4	5	140806929	141012348	205419	+	9.54476	2.55011	1.45501	1.59079	0.00409512	0.0129363	2.07602	1.05382	2.07602	2.14727	1.03432	1.35718	3.1756
PCDHA8	5	140841187	141012348	171161	+	95.7646	22.6726	14.4764	15.9608	9.16188e-08	4.62641e-06	2.42277	1.27665	2.42277	22.5953	9.32624	2.06816	2.83816
PCDHAC1	5	140926369	141012345	85976	+	73.9073	17.0479	11.6456	12.3179	5.94227e-06	8.5368e-05	1.91759	0.939293	1.91759	16.1919	8.44388	1.60471	2.29147
PCDHB10	5	141192353	141195648	3295	+	60.9438	14.0133	9.59395	10.1573	5.83021e-06	8.45661e-05	1.937	0.953822	1.937	13.3978	6.91679	1.61739	2.31975
PCDHB11	5	141199610	141203780	4170	+	32.5351	7.38443	5.20661	5.42252	0.000972784	0.00417396	1.65484	0.726696	1.65484	6.76004	4.085	1.2818	2.13645
PCDHB12	5	141208697	141212572	3875	+	17.8189	5.08737	2.72347	2.96981	0.00065298	0.00304248	2.10261	1.07218	2.10261	4.02523	1.91439	1.48193	2.98327
PCDHB13	5	141213919	141218980	5061	+	18.1893	5.09759	2.67564	3.03155	2.11339e-05	0.000222572	2.6425	1.40191	2.6425	4.39855	1.66454	1.94822	3.5842
PCDHB14	5	141222932	141227760	4828	+	139.474	30.0414	22.5212	23.2456	2.76232e-06	4.82354e-05	1.64307	0.716395	1.64307	28.9014	17.5899	1.45063	1.86104
PCDHB15	5	141245395	141249366	3971	+	6.35256	1.43945	1.02533	1.05876	0.0204811	0.0474689	1.59202	0.670863	1.59202	1.30058	0.816937	1.09787	2.3086
PCDHB16	5	141181399	141186400	5001	+	67.7049	15.8232	10.8127	11.2841	6.50157e-06	9.08943e-05	1.77882	0.830918	1.77882	14.4467	8.12155	1.51996	2.08176
PCDHB3	5	141100473	141103828	3355	+	21.4888	4.80815	3.45714	3.58146	0.000250169	0.00144557	1.69372	0.760194	1.69372	4.5038	2.65912	1.36225	2.10584
PCDHB7	5	141172644	141176384	3740	+	9.01695	2.02547	1.41471	1.50283	0.0151063	0.0370017	1.66916	0.739121	1.66916	1.87958	1.12607	1.08462	2.56873
PCDHB9	5	141187127	141191542	4415	+	75.4139	16.9721	11.9339	12.569	1.93108e-06	3.68219e-05	1.89176	0.919733	1.89176	16.445	8.69295	1.62102	2.20772
PCDHGA4	5	141355021	141512976	157955	+	9.45769	2.46828	1.35432	1.57628	0.000135978	0.000909636	2.83251	1.50208	2.83251	2.32998	0.822585	1.86845	4.29398
PCDHGA9	5	141402932	141512980	110048	+	50.2962	10.7735	8.11738	8.3827	0.00223105	0.00798119	1.52311	0.607018	1.52311	10.1207	6.64474	1.19659	1.93872
PCDHGB2	5	141360042	141512980	152938	+	10.5884	2.75591	1.67778	1.76473	0.00514711	0.0155313	1.7578	0.813769	1.7578	2.24965	1.27981	1.24347	2.48487
PCDHGB7	5	141417645	141512976	95331	+	64.349	13.6578	10.4381	10.7248	1.69161e-05	0.000189195	1.59264	0.671416	1.59264	13.1764	8.27331	1.3832	1.83378
PCGF5	10	91163012	91284338	121326	+	121.418	27.1875	19.3682	20.2363	1.04166e-05	0.000129925	0.566823	-0.819031	-1.76422	14.6416	25.8309	-2.07896	-1.49713
PCID2	13	113177536	113208716	31180	-	160.544	32.8826	26.1827	26.7573	5.24389e-06	7.86759e-05	0.66151	-0.596165	-1.51169	21.3062	32.2084	-1.68845	-1.35344
PCP4L1	1	161258745	161285451	26706	+	14.0019	3.85083	1.96471	2.33366	9.41908e-07	2.20662e-05	3.33255	1.73663	3.33255	3.59004	1.07727	2.54528	4.36333
PDE2A	11	72576141	72674592	98451	-	167.997	41.1979	26.474	27.9995	1.47867e-06	3.02278e-05	1.92299	0.943354	1.92299	36.8409	19.1581	1.65203	2.2384
PDE3A	12	20369245	20684382	315137	+	11.6716	2.85073	1.85733	1.94526	0.00164376	0.00628209	1.77419	0.827158	1.77419	2.48812	1.4024	1.30853	2.40556
PDGFC	4	156760454	156971800	211346	-	13.9948	3.21461	2.251	2.33247	0.00275767	0.00945277	0.610206	-0.712632	-1.63879	1.76783	2.89711	-2.17766	-1.23327
PDLIM3	4	185500660	185535508	34848	-	33.6886	8.55198	5.04383	5.61477	1.27446e-06	2.74539e-05	2.52362	1.3355	2.52362	8.04262	3.18693	2.03553	3.12875
PDLIM7	5	177483394	177497607	14213	-	6.67747	1.56516	1.06103	1.11291	0.0130793	0.033035	1.69278	0.75939	1.69278	1.39923	0.826591	1.12955	2.53684
PDPK1	16	2537979	2603189	65210	+	359.121	74.763	58.6164	59.8535	7.14082e-07	1.80629e-05	1.50317	0.58801	1.50317	71.8849	47.8221	1.37558	1.6426
PDZD2	5	31639131	32110933	471802	+	27.497	7.77934	3.40392	4.58284	3.01522e-07	1.04097e-05	4.80775	2.26536	4.80775	7.5875	1.57818	3.49055	6.62202
PDZD4	X	153802166	153830566	28400	-	81.7287	19.241	13.2422	13.6214	0.000593537	0.0028263	1.52918	0.612759	1.52918	16.4715	10.7714	1.2613	1.85396
PEG10	7	94656325	94669696	13371	+	1380.32	313.631	216.011	230.053	2.4004e-10	1.41238e-07	0.48845	-1.03372	-2.04729	150.988	309.118	-2.20067	-1.90461
PFAS	17	8247618	8270492	22874	+	362.703	75.2965	58.9996	60.4505	7.12207e-06	9.72583e-05	0.654076	-0.61247	-1.52887	47.8082	73.0927	-1.72033	-1.35873
PFKFB4	3	48517684	48562016	44332	-	9.68002	2.35584	1.53232	1.61334	0.00997524	0.0266	1.70262	0.767757	1.70262	2.03277	1.19391	1.16451	2.48939
PGF	14	74941834	74955627	13793	-	61.9623	13.8094	9.78677	10.3271	1.41673e-06	2.92948e-05	1.92509	0.944927	1.92509	13.5931	7.06101	1.65136	2.24419
PGPEP1	19	18340598	18369951	29353	+	19.7275	4.87939	3.07045	3.28792	7.66566e-05	0.000581499	2.04979	1.03547	2.04979	4.41968	2.15617	1.5809	2.65774
PHACTR1	6	12716805	13290485	573680	+	144.331	30.5421	23.5073	24.0552	3.11123e-05	0.000296927	1.51177	0.596239	1.51177	28.9564	19.1539	1.32325	1.72715
PHETA1	12	111360651	111369122	8471	-	18.2684	4.32702	2.93253	3.04473	0.00810519	0.0224905	1.57003	0.650789	1.57003	3.72005	2.36942	1.15332	2.1373
PHF1	6	33410399	33416454	6055	+	67.144	15.3284	10.8037	11.1907	0.000221956	0.00132872	1.63284	0.707382	1.63284	13.8805	8.50085	1.34191	1.98685
PHKA1	X	72578814	72714320	135506	-	88.7732	20.7413	14.3604	14.7955	0.000138456	0.000921657	0.634888	-0.655427	-1.57508	11.4913	18.0997	-1.87432	-1.32362
PHLDB2	3	111732497	111976518	244021	+	432.531	113.445	62.1635	72.0884	1.6533e-10	1.03357e-07	0.329512	-1.6016	-3.03479	35.7335	108.443	-3.38168	-2.72348
PHOX2A	11	72239077	72245665	6588	-	184.89	42.3944	29.6598	30.815	1.09293e-05	0.000135321	1.69606	0.762188	1.69606	38.7707	22.8592	1.45698	1.97437
PHOX2B-AS1	4	41748293	41824120	75827	+	28.6199	6.03276	4.62318	4.76998	0.00110335	0.00459295	1.57576	0.656049	1.57576	5.83622	3.70375	1.24805	1.98952
PIGCP1	11	33075566	33076461	895	-	66.8573	14.394	10.7524	11.1429	9.34424e-06	0.000118961	1.69633	0.76242	1.69633	14.0205	8.26521	1.45907	1.97218
PIGW	17	36534987	36539311	4324	+	244.629	51.4959	39.8198	40.7715	2.90491e-06	5.03357e-05	0.652064	-0.616915	-1.53359	32.1847	49.3583	-1.70804	-1.37696
PIK3AP1	10	96593315	96720515	127200	-	19.8801	4.66623	3.12676	3.31335	5.27377e-05	0.000441919	0.508669	-0.975201	-1.96591	2.23429	4.39242	-2.48181	-1.55726
PIK3C2B	1	204422628	204494725	72097	-	179.875	38.1137	29.1826	29.9792	1.8994e-06	3.63573e-05	1.5845	0.664027	1.5845	36.7592	23.1993	1.41862	1.76978
PIK3IP1	22	31281594	31292535	10941	-	11.1798	2.76356	1.77204	1.86331	0.0062694	0.0182225	1.7157	0.778798	1.7157	2.35437	1.37225	1.20297	2.44696
PIK3R1	5	68215756	68301822	86066	+	242.398	53.592	39.0121	40.3997	3.04468e-07	1.04578e-05	1.69211	0.758825	1.69211	50.786	30.0134	1.52312	1.87985
PIM1	6	37170152	37175429	5277	+	181.413	37.3773	29.5303	30.2354	1.73905e-06	3.3814e-05	1.54277	0.625522	1.54277	36.6894	23.7815	1.3911	1.71098
PINK1	1	20633458	20651512	18054	+	14.2807	3.62604	2.20893	2.38012	0.00351245	0.0114483	1.89049	0.918763	1.89049	3.11337	1.64686	1.27681	2.79914
PIP5K1C	19	3630183	3700469	70286	-	43.1934	11.5539	6.87786	7.19891	0.0029155	0.00986387	1.64471	0.717829	1.64471	8.9538	5.44401	1.24383	2.17477
PKIA	8	78516340	78605268	88928	+	1268.34	267.216	206.205	211.39	3.49879e-07	1.12941e-05	1.5519	0.634033	1.5519	257.108	165.673	1.4194	1.69677
PKIB	6	122471917	122726374	254457	+	311.311	72.0548	49.829	51.8851	4.54026e-06	7.10328e-05	1.72511	0.786687	1.72511	65.6909	38.0793	1.4932	1.99303
PKMYT1	16	2968024	2980480	12456	-	20.4194	4.83291	3.29521	3.40324	0.00347299	0.0113508	1.56672	0.647746	1.56672	4.15466	2.65182	1.19906	2.04711
PKN3	9	128702503	128720917	18414	+	7.61923	1.76526	1.21832	1.26987	0.0154466	0.0376525	0.611964	-0.708481	-1.63408	0.964185	1.57556	-2.39353	-1.1156
PLCB4	20	9068763	9481243	412480	+	185.257	40.0931	29.8037	30.8762	6.53959e-06	9.12373e-05	1.67003	0.739871	1.67003	38.6244	23.128	1.44991	1.92356
PLCE1	10	94030812	94332824	302012	+	74.6945	15.2841	12.1558	12.4491	0.000130733	0.000881077	0.660082	-0.599283	-1.51496	9.90001	14.9981	-1.77876	-1.29029
PLCH1	3	155375580	155745068	369488	-	31.0915	7.51466	5.02887	5.18191	0.00120433	0.00489267	0.638467	-0.647316	-1.56625	4.0385	6.32531	-1.95955	-1.25189
PLCL1	2	197804593	198572582	767989	+	92.5033	25.4803	12.8603	15.4172	9.19096e-10	3.4428e-07	3.44682	1.78527	3.44682	23.9004	6.93404	2.99206	3.97069
PLD3	19	40348456	40380440	31984	+	82.1288	21.0823	12.8611	13.6881	5.33485e-05	0.000445933	1.92861	0.947562	1.92861	18.0284	9.34786	1.54105	2.41364
PLD5	1	242082986	242524698	441712	-	193.969	42.6718	31.5377	32.3282	1.1028e-05	0.000135806	1.53911	0.622092	1.53911	39.1922	25.4643	1.35937	1.74261
PLD6	17	17200995	17206334	5339	-	154.7	38.3294	23.8011	25.7834	3.90943e-08	2.63215e-06	0.44865	-1.15634	-2.22891	15.9703	35.5965	-2.54143	-1.95482
PLEKHA2	8	38901235	38973913	72678	+	118.722	25.7388	19.0715	19.787	1.85794e-06	3.59192e-05	1.7119	0.775597	1.7119	24.9813	14.5928	1.50446	1.94794
PLEKHA6	1	204218853	204377666	158813	-	285.385	76.3189	39.912	47.5641	8.49512e-11	9.03966e-08	3.37106	1.7532	3.37106	73.3651	21.7632	3.01594	3.76799
PLEKHG2	19	39412669	39428416	15747	+	147.271	32.0837	23.8264	24.5451	1.05477e-05	0.000131317	1.60458	0.682195	1.60458	30.2426	18.8477	1.40137	1.83726
PLEKHH2	2	43637260	43767988	130728	+	12.7837	2.85691	2.06899	2.13062	0.00893455	0.0243233	0.649694	-0.622169	-1.53919	1.67819	2.58305	-2.07402	-1.14228
PLEKHH3	17	42667914	42676995	9081	-	12.5787	3.08068	1.95805	2.09645	0.000326337	0.00177648	2.03214	1.023	2.03214	2.81008	1.38282	1.49538	2.76155
PLPP2	19	281040	291404	10364	-	9.87339	2.47133	1.54579	1.64557	0.00264052	0.00914152	0.534155	-0.90467	-1.87212	1.14589	2.14524	-2.7011	-1.29755
PLPPR2	19	11355386	11365699	10313	+	70.1419	16.445	11.3099	11.6903	0.000112468	0.000785361	1.62335	0.698975	1.62335	14.4681	8.91251	1.35604	1.94335
PLXNA2	1	208022242	208244385	222143	-	186.723	44.7882	28.8708	31.1205	1.01e-07	4.95228e-06	2.16062	1.11144	2.16062	42.5483	19.6927	1.8815	2.48113
PLXNA3	X	154458281	154477780	19499	+	31.8913	7.8714	5.14789	5.31522	0.000920782	0.00399517	1.593	0.671746	1.593	6.53077	4.09967	1.27433	1.99135
PLXNA4	7	132123332	132648689	525357	-	109.929	27.4083	16.5998	18.3215	5.85386e-07	1.59992e-05	2.39461	1.25979	2.39461	25.8485	10.7945	1.98328	2.89124
PLXNC1	12	94148577	94307676	159099	+	121.053	27.3982	18.8516	20.1756	3.07385e-08	2.23647e-06	2.10224	1.07193	2.10224	27.3441	13.0071	1.86661	2.36761
PMAIP1	18	59899996	59904306	4310	+	451.944	109.274	71.9478	75.324	4.00622e-05	0.000359524	0.574067	-0.80071	-1.74196	54.9418	95.7062	-2.09636	-1.44747
PMEL	12	55954105	55973318	19213	-	54.7253	14.6782	7.80018	9.12088	1.43493e-07	6.34837e-06	3.08359	1.62461	3.08359	13.7747	4.46709	2.49967	3.80391
PMM1	22	41576900	41589872	12972	-	16.9974	4.09686	2.71295	2.8329	0.00641949	0.0185869	1.64948	0.722007	1.64948	3.52734	2.13846	1.2036	2.26052
PNMA8C	19	46424697	46428952	4255	-	12.1735	3.63655	1.73895	2.02891	8.57433e-05	0.000633733	2.87454	1.52333	2.87454	3.01052	1.04731	1.94272	4.25329
PNO1	2	68157888	68176239	18351	+	367.477	82.1003	58.4505	61.2462	1.44975e-08	1.32114e-06	0.541424	-0.885168	-1.84698	43.0254	79.467	-2.02336	-1.68598
PNP	14	20468954	20477090	8136	+	256.834	55.9933	41.3713	42.8057	6.31189e-06	8.8978e-05	0.605814	-0.723054	-1.65067	32.298	53.3135	-1.89402	-1.43859
PNPT1	2	55634061	55693864	59803	-	747.805	160.414	121.179	124.634	8.118e-08	4.31516e-06	0.623189	-0.682258	-1.60465	95.7014	153.567	-1.74351	-1.47685
PNPT1P1	3	3981981	3984296	2315	-	7.20915	1.71483	1.09928	1.20153	0.00046416	0.00232046	0.441333	-1.18006	-2.26586	0.735808	1.66724	-3.28751	-1.56171
PNRC1	6	89080751	89085161	4410	+	289.014	66.0469	46.4937	48.169	4.21697e-06	6.77771e-05	1.66995	0.739804	1.66995	60.2557	36.0824	1.46003	1.91005
POLR1B	2	112541915	112579819	37904	+	746.48	158.411	120.904	124.413	3.80873e-08	2.59013e-06	0.619361	-0.691148	-1.61457	95.1693	153.657	-1.74574	-1.49325
POLR3E	16	22297375	22335102	37727	+	97.9537	21.1051	15.8026	16.3256	5.87995e-06	8.4833e-05	0.604665	-0.725791	-1.65381	12.3035	20.3477	-1.89595	-1.44259
POLR3G	5	90471748	90514558	42810	+	45.4101	12.332	6.35582	7.56834	7.66225e-08	4.21517e-06	0.301426	-1.73012	-3.31756	3.50584	11.6308	-4.09439	-2.68812
POMT1	9	131502902	131523807	20905	+	23.8763	5.75398	3.78654	3.97938	0.0115607	0.0299402	1.57676	0.656959	1.57676	4.87008	3.08867	1.11031	2.23916
PON2	7	95404862	95435330	30468	-	9.00422	2.2696	1.40771	1.5007	0.00435048	0.0135848	0.5283	-0.920572	-1.89287	1.03752	1.96389	-2.7647	-1.29596
PPAN	19	10106362	10112013	5651	+	28.3539	6.65729	4.50557	4.72565	0.000799627	0.003562	0.577616	-0.791816	-1.73125	3.46043	5.99088	-2.26628	-1.32254
PPARGC1B	5	149730298	149855023	124725	+	35.538	10.4902	4.84763	5.923	7.0056e-08	4.00028e-06	0.274541	-1.86491	-3.64244	2.55167	9.29432	-4.55577	-2.91221
PPAT	4	56393362	56435616	42254	-	974.085	209.097	157.72	162.347	9.7716e-07	2.26437e-05	0.625757	-0.676327	-1.59807	124.976	199.719	-1.7757	-1.4382
PPEF1	X	18675909	18827922	152013	+	62.4772	14.3736	10.0381	10.4129	1.3748e-05	0.000160928	0.586559	-0.769653	-1.70486	7.69938	13.1264	-1.99557	-1.4565
PPIF	10	79347469	79355335	7866	+	468.375	101.573	75.8502	78.0625	3.15975e-07	1.06314e-05	0.621763	-0.685564	-1.60833	59.8563	96.2687	-1.76914	-1.46214
PPIP5K2	5	103120149	103212800	92651	+	528.344	119.782	84.0906	88.0574	5.22047e-07	1.49963e-05	0.552629	-0.855617	-1.80953	62.6847	113.43	-2.05179	-1.59588
PPM1F-AS1	22	21938269	21977633	39364	+	17.303	3.71285	2.81432	2.88383	0.00409127	0.0129302	1.51144	0.595926	1.51144	3.4711	2.29655	1.17553	1.94334
PPP1R15A	19	48872421	48876059	3638	+	56.6033	12.8428	9.0586	9.43389	0.000130355	0.000879845	1.69913	0.764793	1.69913	11.8774	6.99033	1.38358	2.08664
PPP1R18	6	30676389	30687896	11507	-	246.006	59.6102	38.3162	41.001	3.15557e-07	1.06314e-05	2.06323	1.04491	2.06323	55.2322	26.7697	1.78347	2.38687
PPP2R5B	11	64917553	64934476	16923	+	24.987	6.99682	3.59941	4.1645	1.86537e-06	3.59875e-05	2.9441	1.55782	2.9441	6.21724	2.11177	2.27362	3.8123
PPRC1	10	102132994	102150334	17340	+	287.008	64.7058	46.403	47.8346	0.000174522	0.00110477	0.644287	-0.634226	-1.5521	37.4864	58.1828	-1.85098	-1.30149
PRADC1	2	73228010	73233240	5230	-	40.9754	9.71265	6.57775	6.82924	0.000308432	0.00169469	1.66598	0.736373	1.66598	8.53524	5.12325	1.34486	2.06379
PRCD	17	76527586	76553579	25993	+	52.7724	13.7721	7.87967	8.7954	1.45835e-07	6.40776e-06	2.57387	1.36394	2.57387	12.6687	4.92206	2.1592	3.06817
PRDM1	6	105993463	106109940	116477	+	10.5005	2.85744	1.53464	1.75008	2.99183e-05	0.000289824	0.361012	-1.46988	-2.76999	0.928425	2.57173	-3.85533	-1.9902
PRDX5	11	64318121	64321812	3691	+	97.9633	24.0744	15.859	16.3272	0.00133691	0.00531661	1.50885	0.593449	1.50885	19.6387	13.0157	1.22711	1.85528
PRDX6	1	173477330	173488816	11486	+	1258.92	279.12	199.172	209.819	2.4031e-09	5.02382e-07	0.523162	-0.934672	-1.91146	144.134	275.505	-2.07325	-1.76229
PRKACA	19	14091688	14118085	26397	-	292.76	62.8786	47.6656	48.7934	3.74676e-06	6.15352e-05	1.52659	0.610314	1.52659	58.9629	38.6239	1.3692	1.70207
PRKCA	17	66302613	66810744	508131	+	2062.19	446.547	329.787	343.698	3.90319e-09	6.27346e-07	1.77959	0.831547	1.77959	440.096	247.301	1.64994	1.91944
PRKG1	10	50990888	52298424	1307536	+	9.28717	2.66646	1.41104	1.54786	0.00228669	0.00814149	0.475236	-1.07328	-2.10422	0.997263	2.09846	-3.20388	-1.38199
PRKG1-AS1	10	52230398	52314508	84110	-	9.73447	2.45026	1.56193	1.62241	0.0202129	0.046984	1.56517	0.646319	1.56517	1.97987	1.26495	1.09037	2.24671
PRKN	6	161347417	162727776	1380359	-	7.59812	2.02546	1.17566	1.26635	0.000932433	0.00403184	2.09703	1.06835	2.09703	1.71492	0.817787	1.45931	3.01343
PRMT3	11	20387558	20509339	121781	+	305.772	65.1829	49.3822	50.9621	4.43223e-06	7.00717e-05	0.61654	-0.697735	-1.62196	38.8733	63.0508	-1.84381	-1.42679
PROK2	3	71771655	71785207	13552	-	36.1011	9.23712	5.51592	6.01685	8.93175e-06	0.000114931	0.442576	-1.176	-2.2595	3.69189	8.34182	-2.84161	-1.79663
PROKR1	2	68643579	68658252	14673	+	155.107	32.6492	25.3038	25.8512	7.52735e-06	0.000101462	1.50523	0.589982	1.50523	31.0646	20.6378	1.34368	1.68619
PRORP	14	35121846	35277623	155777	+	136.702	29.3667	21.9914	22.7837	0.000297122	0.00165064	0.625274	-0.677439	-1.5993	17.5307	28.0368	-1.96122	-1.30417
PRPH	12	49293252	49298687	5435	+	207.088	57.4022	31.184	34.5147	1.01987e-06	2.34726e-05	2.40695	1.26721	2.40695	48.7681	20.2614	1.97804	2.92885
PRR12	19	49591182	49626440	35258	+	31.1709	7.77935	4.99762	5.19516	0.0108166	0.0284181	1.53782	0.62089	1.53782	6.29613	4.09418	1.13903	2.07625
PRR14	16	30650717	30656441	5724	+	28.8376	7.64125	4.50095	4.80627	0.000121034	0.000832386	1.97768	0.98381	1.97768	6.38434	3.22819	1.52998	2.55639
PRR36	19	7868719	7874391	5672	-	15.1469	4.09686	2.25737	2.52448	3.98084e-05	0.000358133	2.51639	1.33135	2.51639	3.61312	1.43584	1.84995	3.42289
PRRT2	16	29811382	29815893	4511	+	9.66141	2.24093	1.53275	1.61024	0.0206884	0.0478473	1.59523	0.67376	1.59523	1.97955	1.24092	1.05848	2.40414
PRSS12	4	118280038	118353004	72966	-	710.608	148.653	114.959	118.435	2.5354e-08	1.96066e-06	1.63161	0.706298	1.63161	146.86	90.0092	1.51095	1.76191
PRTG	15	55611544	55743153	131609	-	112.522	26.8306	17.3734	18.7536	1.60506e-07	6.98433e-06	0.458458	-1.12514	-2.18123	11.7902	25.7171	-2.52666	-1.88302
PRXL2B	1	2586491	2591470	4979	+	25.9045	6.30635	4.08419	4.31741	0.000125435	0.000857267	1.89108	0.919211	1.89108	5.64811	2.98671	1.48375	2.41024
PSAT1	9	78297125	78330094	32969	+	678.509	150.053	107.602	113.085	2.41298e-09	5.02382e-07	0.530242	-0.915278	-1.88593	78.3697	147.8	-2.04206	-1.74174
PSMG1	21	39174769	39183489	8720	-	204.809	44.8859	32.7799	34.1349	7.99057e-08	4.31516e-06	0.564742	-0.824335	-1.77072	24.6397	43.6301	-1.95718	-1.60202
PSMG3-AS1	7	1570073	1589627	19554	+	35.9478	9.62059	5.48176	5.99129	6.23241e-06	8.84101e-05	2.28919	1.19484	2.28919	8.33957	3.64302	1.82974	2.86403
PTCHD1	X	23334849	23404375	69526	+	8.56704	2.23674	1.31015	1.42784	0.00248199	0.00871529	2.08763	1.06186	2.08763	1.9308	0.924879	1.38375	3.14954
PTCHD4	6	47878028	48068690	190662	-	33.3972	8.92929	4.66482	5.56621	1.52549e-07	6.65949e-06	0.299034	-1.74162	-3.3441	2.56265	8.56976	-4.19565	-2.66537
PTGES3L	17	42968088	42980434	12346	-	32.3293	7.96943	4.93111	5.38821	0.000289456	0.00161935	2.11077	1.07777	2.11077	7.31219	3.46423	1.51723	2.93651
PTGFR	1	78303884	78540702	236818	+	87.7221	21.5771	13.2455	14.6203	8.77775e-08	4.5167e-06	2.43892	1.28624	2.43892	20.7378	8.50287	2.08141	2.85784
PTP4A3	8	141391995	141432455	40460	+	12.1012	2.98229	1.83316	2.01687	0.000215744	0.00130423	2.28675	1.1933	2.28675	2.80647	1.22727	1.62117	3.22559
PTPN13	4	86594315	86815172	220857	+	398.27	86.6953	64.6346	66.3784	1.22325e-06	2.65877e-05	0.635549	-0.653924	-1.57344	51.5872	81.1695	-1.7458	-1.4181
PTPN14	1	214348700	214552450	203750	-	20.2121	5.17903	3.03754	3.36868	1.73179e-05	0.000192575	0.410641	-1.28405	-2.43522	1.96126	4.77609	-3.20184	-1.85215
PTPN21	14	88465778	88555008	89230	-	244.511	51.509	39.3355	40.7518	6.35623e-08	3.80167e-06	1.70733	0.771742	1.70733	51.3988	30.1048	1.55766	1.87138
PTPRD-AS1	9	8858127	8864773	6646	+	8.21262	2.01747	1.31674	1.36877	0.0141768	0.0352092	1.62095	0.696836	1.62095	1.69305	1.04449	1.1271	2.33118
PTPRM	18	7566782	8406862	840080	+	13.8917	3.50856	2.1514	2.31529	0.000185122	0.00115798	2.09284	1.06546	2.09284	3.13338	1.49719	1.55511	2.81652
PTPRN	2	219289623	219309649	20026	-	62.1439	15.2364	9.90556	10.3573	0.00073862	0.00335428	1.68567	0.753319	1.68567	13.0016	7.71304	1.32007	2.15251
PTPRO	12	15322257	15602176	279919	+	337.861	74.2965	54.5917	56.3101	2.9433e-07	1.02774e-05	1.63991	0.713621	1.63991	69.9597	42.6605	1.48613	1.80962
PUM3	9	2720469	2844096	123627	-	312.271	68.219	49.7716	52.0452	1.94018e-08	1.64103e-06	0.548614	-0.866137	-1.82278	36.8752	67.2153	-1.9981	-1.66283
PUS1	12	131929200	131945897	16697	+	28.8782	7.71639	4.56338	4.81304	0.00145691	0.00569673	0.563845	-0.82663	-1.77354	3.47069	6.15539	-2.3617	-1.33185
PUS7	7	105439661	105522272	82611	-	563.105	121.438	90.544	93.8508	2.74702e-08	2.03287e-06	0.585008	-0.773473	-1.70938	69.2785	118.423	-1.86069	-1.57037
PXDNL	8	51319577	51809446	489869	-	24.1704	5.88945	3.78296	4.0284	1.92411e-05	0.000207813	2.0268	1.01921	2.0268	5.39498	2.66182	1.63191	2.51725
PYGL	14	50857891	50944484	86593	-	44.2576	12.7605	5.86851	7.37627	6.48508e-09	8.12616e-07	0.247289	-2.01573	-4.04386	2.92485	11.8277	-4.90213	-3.33585
QPCTL	19	45692666	45703990	11324	+	9.10173	2.32003	1.41454	1.51696	0.0115186	0.0298565	0.558268	-0.840971	-1.79126	1.08693	1.94698	-2.77745	-1.15523
QTRT2	3	114005833	114088423	82590	+	458.141	92.9427	74.7685	76.3568	9.49921e-07	2.21261e-05	0.666344	-0.585662	-1.50073	61.0677	91.6459	-1.64402	-1.36992
RAB11B	19	8389981	8404435	14454	+	39.4784	10.173	6.2829	6.57974	0.00191624	0.00711258	1.67706	0.745937	1.67706	8.24384	4.91564	1.27537	2.20527
RAB27B	18	54717860	54895517	177657	+	32.0407	9.1221	4.81386	5.34012	4.02771e-06	6.54348e-05	2.46093	1.29921	2.46093	7.59429	3.08594	1.95244	3.10186
RAB29	1	205767986	205775483	7497	-	161.263	40.5386	24.2292	26.8772	1.00223e-07	4.93206e-06	0.404195	-1.30688	-2.47405	15.4731	38.2812	-2.91391	-2.10059
RAB31	18	9708275	9862552	154277	+	19.731	4.76146	3.09021	3.2885	0.000176611	0.00111425	0.509077	-0.974044	-1.96434	2.21871	4.3583	-2.56252	-1.50579
RAB39B	X	155258235	155264492	6257	-	235.28	50.4781	38.3069	39.2133	1.76611e-06	3.42418e-05	1.53556	0.618769	1.53556	47.496	30.9306	1.38632	1.70088
RAB3B	1	51907956	51990701	82745	-	447.292	109.245	67.1351	74.5486	6.29404e-11	8.51773e-08	2.53726	1.34327	2.53726	106.947	42.1504	2.33559	2.75635
RAB3D	19	11322068	11346271	24203	-	105.495	25.2893	16.7319	17.5824	1.82611e-05	0.000199779	1.81909	0.863217	1.81909	22.691	12.4738	1.51438	2.18512
RAB5B	12	55973913	55996684	22771	+	856.007	182.121	138.409	142.668	1.06124e-07	5.13144e-06	1.63047	0.705284	1.63047	176.862	108.473	1.49272	1.78093
RAB6B	3	133824235	133895883	71648	-	348.932	81.6831	53.9395	58.1553	7.1472e-10	3.1201e-07	2.19226	1.13242	2.19226	79.8755	36.4352	2.00828	2.3931
RAB9B	X	103822327	103832258	9931	-	54.6637	11.3258	8.88543	9.11062	4.10813e-05	0.000367208	1.56294	0.644261	1.56294	11.1117	7.10951	1.34592	1.81495
RACK1	5	181236897	181248097	11200	-	2983.98	646.007	484.899	497.33	2.60107e-05	0.000259207	0.658874	-0.601926	-1.51774	395.06	599.599	-1.73409	-1.32838
RAD1	5	34905260	34918990	13730	-	500.605	103.037	81.6067	83.4342	5.25568e-07	1.50053e-05	0.658449	-0.602856	-1.51872	66.2513	100.617	-1.659	-1.39031
RALGPS1	9	126914774	127223167	308393	+	50.943	12.2444	7.87984	8.49049	4.8378e-07	1.42017e-05	2.17617	1.12179	2.17617	11.6346	5.34638	1.84956	2.56044
RAMP1	2	237858893	237912107	53214	+	7.88324	2.08402	1.18469	1.31387	0.00414247	0.0130463	2.15373	1.10683	2.15373	1.79453	0.83322	1.34399	3.45132
RAPH1	2	203394345	203535336	140991	-	314.134	65.9889	51.1883	52.3557	3.07059e-06	5.28681e-05	1.51652	0.600764	1.51652	63.1019	41.6096	1.36519	1.68462
RARA	17	40309180	40357644	48464	+	77.5794	17.166	12.5964	12.9299	0.000352381	0.00188452	1.51768	0.601869	1.51768	15.5885	10.2713	1.26682	1.81822
RARB	3	25174332	25597933	423601	+	45.5419	11.3698	7.04618	7.59031	1.21999e-06	2.65864e-05	2.16349	1.11336	2.16349	10.3819	4.79869	1.81245	2.58253
RASSF4	10	44959407	44995892	36485	+	7.19082	2.11753	1.06389	1.19847	0.000205062	0.00125513	2.59928	1.37811	2.59928	1.73099	0.66595	1.77132	3.81424
RBM24	6	17281361	17293872	12511	+	31.053	6.90475	5.01384	5.17551	0.00233095	0.00828818	1.54455	0.627184	1.54455	6.28309	4.06792	1.20364	1.98201
RBMS3	3	28574791	30010392	1435601	+	1243.03	280.668	200.539	207.171	6.87892e-07	1.76982e-05	1.64484	0.717947	1.64484	257.681	156.66	1.47691	1.83186
RCBTB2	13	48488959	48533257	44298	-	55.495	12.2797	9.0139	9.24917	0.000200999	0.00123971	1.54038	0.623288	1.54038	11.2166	7.28172	1.29397	1.83372
RCL1	9	4792944	4885918	92974	+	139.813	29.8567	22.6229	23.3021	7.18184e-06	9.79756e-05	0.622114	-0.684749	-1.60742	17.8737	28.7306	-1.83407	-1.40878
RCN1	11	32091074	32105723	14649	+	495.285	117.725	77.0016	82.5474	1.38053e-09	3.81279e-07	0.471488	-1.08471	-2.12095	52.899	112.196	-2.31909	-1.93974
RCN1P2	13	45390353	45391268	915	-	62.4506	15.0359	9.92455	10.4084	7.62027e-06	0.000102408	0.545722	-0.873761	-1.83243	7.34947	13.4674	-2.16764	-1.54906
REEP1	2	86213993	86338084	124091	-	357.969	76.3976	58.0331	59.6615	2.39801e-07	9.06489e-06	1.59874	0.676939	1.59874	73.4073	45.9156	1.45876	1.75216
REEP2	5	138439057	138446970	7913	+	24.712	6.07619	3.90953	4.11866	0.0093233	0.0252496	1.67678	0.745689	1.67678	5.16	3.07733	1.19785	2.34719
RELN	7	103471784	103989659	517875	-	36.5227	8.3811	5.79464	6.08712	8.14751e-05	0.000609173	1.81686	0.861444	1.81686	7.85231	4.32193	1.4596	2.26155
REST	4	56907876	56966679	58803	+	150.92	31.6721	24.3256	25.1534	2.89548e-06	5.02366e-05	0.601962	-0.732257	-1.66124	18.9036	31.4033	-1.88876	-1.46112
RET	10	43077064	43130352	53288	+	30.9056	8.83412	3.71757	5.15094	4.27162e-09	6.54625e-07	5.45672	2.44803	5.45672	8.70635	1.59553	4.35684	6.83427
RETREG1	5	16473038	16617059	144021	-	22.6389	5.52593	3.46775	3.77315	5.69856e-06	8.31915e-05	2.28164	1.19007	2.28164	5.24675	2.29955	1.82617	2.85071
REXO2	11	114439386	114450280	10894	+	87.7705	20.6265	13.8336	14.6284	3.60829e-07	1.1544e-05	0.511917	-0.966018	-1.95344	9.90601	19.3508	-2.23832	-1.70482
RFTN1	3	16313574	16514027	200453	-	64.4484	15.0523	10.3676	10.7414	0.00053315	0.00259105	1.60123	0.679177	1.60123	13.2241	8.25872	1.28961	1.98814
RGL2	6	33291654	33298943	7289	-	79.538	18.9819	12.8641	13.2563	0.000211768	0.00128571	1.57367	0.654134	1.57367	16.2112	10.3015	1.31387	1.88484
RGS12	4	3293028	3439914	146886	+	86.5136	19.7067	14.0261	14.4189	7.92066e-05	0.00059484	1.56416	0.645387	1.56416	17.5913	11.2465	1.33325	1.83506
RGS3	9	113444731	113597744	153013	+	37.3843	9.92138	5.73067	6.23071	2.21522e-05	0.000231853	2.20123	1.13831	2.20123	8.56872	3.8927	1.72872	2.80288
RGS4	1	163068775	163076803	8028	+	113.741	28.7695	17.0438	18.9569	5.51224e-09	7.45971e-07	2.54897	1.34991	2.54897	27.2307	10.683	2.24541	2.89357
RGS8	1	182641816	182684577	42761	-	10.8785	2.80887	1.72026	1.81308	0.00284849	0.00968316	1.79753	0.846019	1.79753	2.32996	1.2962	1.28298	2.51846
RHBDD2	7	75842602	75888927	46325	+	80.0877	18.393	12.9636	13.3479	0.000365141	0.00193555	1.54979	0.632075	1.54979	16.2261	10.4698	1.28251	1.87277
RHBDL3	17	32265832	32324660	58828	+	62.8756	14.0396	10.1363	10.4793	7.41617e-05	0.000569274	1.63728	0.711298	1.63728	13.0115	7.94704	1.3736	1.95156
RHOBTB2	8	22987417	23020200	32783	+	57.6651	12.442	9.31972	9.61086	2.15179e-05	0.000226088	1.6358	0.710001	1.6358	11.9292	7.29254	1.40389	1.90604
RHOC	1	112701127	112707435	6308	-	66.7068	19.195	9.28409	11.1178	1.2501e-07	5.81362e-06	3.35064	1.74444	3.35064	17.1247	5.11088	2.68813	4.17644
RHOQ	2	46541806	46584689	42883	+	899.837	195.682	145.768	149.973	8.98252e-07	2.14359e-05	1.59303	0.671772	1.59303	184.272	115.674	1.43567	1.76764
RHOQP2	2	131460999	131461578	579	+	25.1597	6.20331	3.98446	4.19328	0.000295369	0.00164292	1.82312	0.866413	1.82312	5.41589	2.97067	1.41785	2.34425
RHOQP3	2	130212870	130213491	621	-	35.3242	8.68885	5.6443	5.88736	0.00212103	0.00770368	1.62758	0.70273	1.62758	7.29352	4.4812	1.23913	2.13781
RHOU	1	228735479	228746665	11186	+	1098.81	231.909	178.545	183.135	9.23541e-08	4.62899e-06	1.56651	0.647551	1.56651	223.558	142.711	1.44628	1.69672
RIDA	8	98102344	98117172	14828	-	117.644	26.1876	18.8483	19.6073	1.22595e-06	2.65877e-05	0.572416	-0.804865	-1.74698	14.2755	24.939	-1.98668	-1.53621
RIMKLA	1	42380792	42424233	43441	+	186.375	39.7758	30.1996	31.0625	2.30375e-06	4.21581e-05	1.59748	0.6758	1.59748	38.2076	23.9174	1.42435	1.79166
RIMS3	1	40620680	40665683	45003	-	749.228	166.587	120.166	124.871	5.5091e-07	1.54046e-05	1.71893	0.781509	1.71893	157.889	91.8534	1.5325	1.92804
RIN2	20	19757606	20002460	244854	+	66.9971	14.341	10.874	11.1662	1.93173e-05	0.000208469	1.58236	0.662079	1.58236	13.6843	8.64804	1.3742	1.82205
RND2	17	43025231	43032042	6811	+	73.8725	18.2284	11.3936	12.3121	1.35203e-06	2.85445e-05	2.17403	1.12037	2.17403	16.8661	7.75802	1.81652	2.60189
RNF11	1	51236273	51273448	37175	+	1800.98	406.808	292.847	300.163	4.84721e-05	0.000414386	1.5022	0.587078	1.5022	360.407	239.919	1.30768	1.72566
RNF112	17	19411125	19417277	6152	+	42.7077	10.265	6.79744	7.11794	0.000110578	0.000773895	1.77502	0.827837	1.77502	9.10588	5.13001	1.4334	2.19807
RNF125	18	32018825	32073220	54395	+	14.584	3.83965	2.05735	2.43066	1.41918e-05	0.00016514	0.321777	-1.63587	-3.10774	1.18345	3.67787	-4.38826	-2.20089
RNF152	18	61808067	61894248	86181	-	20.3317	4.48866	3.29145	3.38861	0.00553281	0.0164453	0.660059	-0.599332	-1.51502	2.69471	4.08252	-1.98532	-1.15612
RNF182	6	13924446	13980311	55865	+	310.061	63.8977	50.5801	51.6768	9.45718e-07	2.20662e-05	1.51069	0.595209	1.51069	62.1882	41.1654	1.37723	1.65709
RNF19A	8	100257060	100336219	79159	-	191.259	41.4873	31.137	31.8765	8.46411e-06	0.000110671	1.5258	0.609563	1.5258	38.5123	25.2408	1.35495	1.71819
RNF31	14	24146683	24160661	13978	+	24.2125	5.70615	3.87488	4.03542	0.00156813	0.00605118	1.67028	0.740086	1.67028	5.04836	3.02247	1.28243	2.17542
RNF38	9	36336396	36487549	151153	-	635.608	138.628	102.762	105.935	1.09998e-07	5.27874e-06	1.63325	0.707742	1.63325	131.41	80.4594	1.49461	1.78474
ROGDI	16	4796968	4802881	5913	-	7.20042	1.90281	1.12418	1.20007	0.00411118	0.0129659	1.93155	0.949759	1.93155	1.58141	0.818727	1.30448	2.86005
RORB	9	74497335	74693178	195843	+	166.633	33.9311	27.1599	27.7722	2.08659e-06	3.92737e-05	0.655148	-0.610108	-1.52637	21.9858	33.5586	-1.69154	-1.37733
RPF2	6	110982015	111028264	46249	+	468.947	103.422	75.8347	78.1578	4.68108e-07	1.38619e-05	0.615966	-0.699077	-1.62347	59.5836	96.732	-1.79616	-1.46738
RPF2P1	20	35752814	35753720	906	+	14.8048	3.39676	2.37728	2.46746	0.00188732	0.00703225	0.59802	-0.741735	-1.67219	1.84678	3.08815	-2.20263	-1.26948
RPH3A	12	112570380	112898882	328502	+	14.6313	3.76022	2.27395	2.43855	0.000239376	0.00140018	2.04389	1.03132	2.04389	3.27484	1.60225	1.52054	2.74737
RPIA	2	88691673	88750930	59257	+	184.386	38.8867	29.7119	30.7309	8.18835e-07	2.01112e-05	0.597607	-0.74273	-1.67334	22.9907	38.4712	-1.87561	-1.49288
RPL12	9	127447674	127451407	3733	-	1381.11	322.476	217.734	230.185	4.65374e-08	3.02155e-06	0.516648	-0.952746	-1.93555	156.826	303.545	-2.16088	-1.73372
RPL12P16	2	203190780	203191278	498	+	920.126	219.9	144.608	153.354	4.99365e-07	1.44709e-05	0.513175	-0.962477	-1.94865	104.017	202.692	-2.24296	-1.69296
RPL12P4	20	55074644	55075141	497	+	449.561	102.606	70.4271	74.9268	2.72943e-08	2.03287e-06	0.495836	-1.01207	-2.0168	49.6731	100.181	-2.25425	-1.80435
RPL12P42	19	13157959	13158789	830	-	7.14783	1.74474	1.09957	1.1913	0.00180645	0.00678276	0.480432	-1.0576	-2.08146	0.773207	1.6094	-3.13008	-1.38414
RPL13AP7	21	25361821	25381757	19936	+	13.2658	3.24784	2.13861	2.21097	0.0130906	0.0330452	0.650779	-0.619761	-1.53662	1.74324	2.6787	-2.11294	-1.1175
RPL14P3	4	140366240	140366862	622	-	12.0945	2.95987	1.92977	2.01574	0.0164806	0.039813	0.63006	-0.666438	-1.58715	1.55827	2.47321	-2.27961	-1.10503
RPL17	18	49488453	49492524	4071	-	1333.33	294.7	213.557	222.221	8.12616e-08	4.31516e-06	0.572494	-0.804669	-1.74674	161.807	282.635	-1.92715	-1.58323
RPL17P36	10	118872054	118872603	549	-	39.0036	8.50132	6.32102	6.5006	0.000695589	0.0032002	0.646977	-0.628213	-1.54565	5.10723	7.89398	-1.90236	-1.25582
RPL22L1	3	170864875	170870209	5334	-	989.92	218.069	158.491	164.987	1.61982e-08	1.40519e-06	0.567613	-0.81702	-1.76176	119.479	210.494	-1.91792	-1.61832
RPL23P8	7	20827326	20827754	428	+	40.5483	8.93638	6.55889	6.75805	0.000180197	0.00113424	0.62429	-0.679711	-1.60182	5.19486	8.32123	-1.93316	-1.32727
RPL24P7	3	23134372	23134825	453	+	12.814	2.97082	2.03825	2.13567	0.00583671	0.0172013	0.596677	-0.744979	-1.67595	1.59619	2.67514	-2.36272	-1.1888
RPL24P8	9	70217195	70217669	474	+	203.246	42.2285	33.1591	33.8744	4.27515e-06	6.83064e-05	0.664862	-0.588873	-1.50407	27.0554	40.6933	-1.67393	-1.35145
RPL26	17	8377516	8383214	5698	-	3454.43	794.168	547.916	575.739	4.02371e-09	6.33172e-07	0.532595	-0.908888	-1.8776	400.152	751.325	-2.03973	-1.72836
RPL26P19	5	56504635	56505073	438	-	735.91	166.526	117.185	122.652	6.46273e-08	3.80261e-06	0.549364	-0.864165	-1.82029	86.9782	158.325	-2.01682	-1.64291
RPL32	3	12834485	12841583	7098	-	3208.05	682.071	520.966	534.675	7.11902e-07	1.80415e-05	0.640765	-0.642132	-1.56063	417.612	651.739	-1.7197	-1.41628
RPL34P18	8	93957338	93957692	354	-	137.899	30.1892	22.4643	22.9831	1.74519e-05	0.000193193	0.659278	-0.601041	-1.51681	18.2637	27.7026	-1.72101	-1.33684
RPL35	9	124857880	124861982	4102	-	452.39	97.7347	73.1064	75.3984	0.000286087	0.00160715	0.65075	-0.619825	-1.53669	59.4463	91.3504	-1.85066	-1.27598
RPL35P2	6	34263311	34263674	363	-	15.0551	3.90041	2.33601	2.50918	0.00188887	0.00703607	0.524468	-0.931074	-1.90669	1.72649	3.29188	-2.73995	-1.32684
RPL35P5	7	66606738	66607108	370	-	30.2272	7.00546	4.86647	5.03787	0.000832892	0.0036823	0.618312	-0.693593	-1.61731	3.84966	6.22608	-2.04375	-1.27984
RPL36	19	5674947	5691876	16929	+	154.224	34.4723	24.3862	25.704	0.000706903	0.00324289	0.583122	-0.77813	-1.71491	18.9355	32.4726	-2.24308	-1.3111
RPL5	1	92832013	92841925	9912	+	10601.2	2237.49	1713.9	1766.86	1.73368e-08	1.49439e-06	0.610596	-0.711709	-1.63774	1339.68	2194.05	-1.76473	-1.5199
RPL5P1	15	24908932	24909826	894	-	251.739	54.2438	40.5123	41.9565	3.66429e-06	6.04742e-05	0.599619	-0.737883	-1.66773	31.4549	52.4582	-1.90481	-1.46015
RPL5P12	4	98025390	98026241	851	+	10.1875	2.41346	1.61349	1.69791	0.00242057	0.00854843	0.552041	-0.857152	-1.81146	1.20785	2.18797	-2.52063	-1.30181
RPL5P17	5	85464434	85465311	877	+	14.6764	3.22274	2.29864	2.44606	0.00464119	0.0142651	0.56609	-0.820898	-1.7665	1.76834	3.12378	-2.58301	-1.2081
RPL5P23	8	42341767	42342635	868	-	64.7976	14.6976	10.387	10.7996	2.55359e-05	0.000255604	0.581925	-0.781096	-1.71844	7.94546	13.6538	-2.03769	-1.4492
RPL5P29	11	56357328	56358222	894	+	19.0925	4.48042	3.06255	3.18209	0.00315965	0.0105423	0.611534	-0.709495	-1.63523	2.41503	3.94914	-2.16623	-1.2344
RPL5P34	22	42776406	42777297	891	-	614.618	133.783	99.7833	102.436	6.18518e-07	1.65097e-05	0.636846	-0.650984	-1.57024	79.7096	125.163	-1.72936	-1.42576
RPL5P4	1	35350722	35351608	886	+	176.913	36.2912	28.858	29.4855	2.25658e-06	4.1436e-05	0.660361	-0.598673	-1.51432	23.4541	35.517	-1.67635	-1.36796
RPL5P9	2	110967834	110968720	886	+	8.48619	2.33732	1.34554	1.41437	0.0190156	0.0447413	0.601587	-0.733155	-1.66227	1.06253	1.7662	-2.47015	-1.11861
RPL7	8	73290242	73295790	5548	-	2080.78	482.428	334.965	346.797	3.383e-07	1.10585e-05	0.596889	-0.744466	-1.67535	259.253	434.341	-1.8586	-1.51018
RPL7A	9	133348218	133351427	3209	+	2311.68	490.516	375.331	385.28	6.59982e-06	9.16996e-05	0.647535	-0.62697	-1.54432	302.855	467.705	-1.74055	-1.37021
RPL7AP11	3	121494110	121494909	799	+	24.851	5.74214	3.96694	4.14184	0.000545881	0.00264024	0.58171	-0.781627	-1.71907	3.04651	5.23716	-2.21048	-1.3369
RPL7AP30	4	112788083	112788879	796	-	120.918	27.7451	19.5185	20.1529	0.000245786	0.00142817	0.634293	-0.65678	-1.57656	15.6433	24.6626	-1.90209	-1.30674
RPL7AP6	14	69885340	69886141	801	-	1682.6	354.191	273.357	280.433	4.36158e-06	6.92304e-05	0.648797	-0.62416	-1.54131	220.699	340.167	-1.72815	-1.37468
RPL7AP66	18	39334872	39335673	801	-	57.817	13.1129	9.30859	9.63617	8.22261e-05	0.000613432	0.605726	-0.723262	-1.65091	7.27008	12.0023	-1.98072	-1.37602
RPL7P1	5	150094302	150095049	747	+	1971.81	451.536	317.991	328.635	7.1009e-07	1.80294e-05	0.60685	-0.720588	-1.64785	248.227	409.042	-1.83659	-1.47852
RPL7P21	5	143332605	143333240	635	+	54.5059	12.0064	8.84756	9.08432	0.000329404	0.00178814	0.650675	-0.619991	-1.53687	7.16185	11.0068	-1.84769	-1.27833
RPL7P9	1	96678874	96679621	747	-	5975.43	1373.08	963.052	995.905	2.90063e-07	1.01959e-05	0.601828	-0.732576	-1.6616	748.35	1243.46	-1.83757	-1.50249
RPL9P25	15	66379337	66379916	579	-	12.8619	2.72172	2.0524	2.14365	0.0110779	0.0289864	0.626759	-0.674016	-1.59551	1.65182	2.63549	-2.28719	-1.113
RPP40	6	4994717	5004064	9347	-	33.5507	7.76849	5.40173	5.59179	0.000121048	0.000832386	0.59813	-0.741469	-1.67188	4.18566	6.99791	-2.02974	-1.37711
RPRM	2	153477338	153478763	1425	-	9.25192	2.6699	1.3349	1.54199	0.000983189	0.00420533	2.54981	1.35039	2.54981	2.2152	0.868771	1.57147	4.13722
RPS15AP11	1	44780331	44780716	385	-	15.5168	3.76522	2.49857	2.58613	0.00356537	0.0115643	0.620153	-0.689304	-1.6125	1.97981	3.19245	-2.13504	-1.21786
RPS17	15	82536750	82540460	3710	-	3006.42	671.064	484.538	501.071	4.81092e-06	7.42374e-05	0.611218	-0.710241	-1.63608	380.164	621.978	-1.86493	-1.43531
RPS18	6	33272075	33276512	4437	+	4318.02	996.31	683.16	719.67	3.86827e-08	2.61747e-06	0.527741	-0.922097	-1.89487	497.204	942.136	-2.10358	-1.70686
RPS18P12	17	14705076	14705535	459	-	24.7575	6.1911	3.80851	4.12625	2.84425e-05	0.000278519	0.458514	-1.12496	-2.18096	2.59434	5.65816	-2.79952	-1.69907
RPS18P9	6	149592687	149601879	9192	+	24.766	5.44748	4.02645	4.12767	0.000766825	0.00344651	0.646476	-0.629331	-1.54685	3.24139	5.01394	-1.90403	-1.25667
RPS2	16	1962058	1964842	2784	-	1522.89	331.809	245.629	253.815	7.55331e-06	0.00010171	0.616739	-0.697267	-1.62143	193.646	313.984	-1.85729	-1.41552
RPS27AP11	6	113581501	113581948	447	+	16.2266	3.41298	2.63167	2.70444	0.00709697	0.0201899	0.66444	-0.589788	-1.50503	2.15921	3.24967	-1.9908	-1.13778
RPS2P46	17	19445970	19446853	883	-	400.262	86.3922	64.4654	66.7103	3.1145e-06	5.34202e-05	0.60395	-0.7275	-1.65577	50.238	83.1825	-1.88264	-1.45624
RPS2P5	12	118246084	118246963	879	+	2168.08	469.177	349.976	361.347	2.73177e-07	9.80611e-06	0.60862	-0.716387	-1.64306	273.431	449.263	-1.81338	-1.48874
RPS2P55	X	40934982	40935865	883	-	86.8348	18.9665	14.0462	14.4725	3.67725e-05	0.000339171	0.624348	-0.679578	-1.60167	11.1255	17.8194	-1.87056	-1.37144
RPS3A	4	151099624	151104643	5019	+	3540.64	749.456	577.814	590.107	1.74106e-07	7.29078e-06	0.665443	-0.587612	-1.50276	471.566	708.649	-1.62296	-1.39146
RPS3AP21	5	111192226	111193043	817	-	371.255	81.7541	60.1921	61.8759	3.61547e-05	0.000335354	0.646124	-0.630117	-1.54769	48.5741	75.1777	-1.78939	-1.33864
RPS3AP47	15	43115702	43116494	792	-	24.3486	5.58942	3.87211	4.0581	0.00764577	0.0213737	0.625026	-0.678011	-1.59993	3.1217	4.99451	-2.23787	-1.14385
RPS3AP5	10	84560443	84561264	821	+	167.19	36.8793	27.1256	27.8649	1.29265e-05	0.000154519	0.638865	-0.646416	-1.56527	21.7247	34.0051	-1.78583	-1.37196
RPS4XP1	12	100009052	100009839	787	-	12.2307	3.1506	1.87749	2.03845	0.0141517	0.0351663	0.547502	-0.869063	-1.82648	1.4424	2.6345	-2.89387	-1.15279
RPS4XP13	11	57576292	57577081	789	-	34.3782	9.00994	5.46091	5.7297	0.00310431	0.010391	0.598927	-0.739549	-1.66965	4.29247	7.16693	-2.23891	-1.24513
RPS4XP6	5	37085056	37085853	797	+	19.013	4.58798	3.0761	3.16883	0.00945776	0.025532	0.66548	-0.587533	-1.50268	2.53235	3.8053	-1.99498	-1.13186
RPS4Y1	Y	2841602	2932001	90399	+	1234.73	283.784	199.434	205.788	1.03728e-06	2.37925e-05	0.614637	-0.702193	-1.62698	156.673	254.903	-1.81544	-1.45808
RPS6	9	19375715	19380237	4522	-	6523.41	1410.53	1059.94	1087.24	3.65656e-07	1.16708e-05	0.641996	-0.639364	-1.55764	850.186	1324.29	-1.70483	-1.42317
RPS6KL1	14	74903951	74923303	19352	-	50.5013	13.211	7.68185	8.41688	9.95292e-07	2.30244e-05	2.34025	1.22666	2.34025	11.7941	5.03968	1.93318	2.83303
RPS6P25	19	12894133	12894881	748	+	8.21451	1.98377	1.27566	1.36909	0.003384	0.0111236	0.516098	-0.954282	-1.93762	0.932107	1.80606	-2.88905	-1.29951
RPS7P1	17	28467822	28468407	585	+	2229.95	477.945	363.248	371.659	4.15172e-07	1.27985e-05	0.656237	-0.60771	-1.52384	294.519	448.799	-1.66205	-1.39712
RPS7P10	13	21628413	21629016	603	-	119.429	25.3128	19.3156	19.9048	8.57795e-06	0.000111513	0.619402	-0.691053	-1.61446	15.2267	24.5828	-1.84908	-1.40961
RRAGB	X	55717739	55758775	41036	+	65.7315	15.1312	10.3903	10.9552	3.80016e-06	6.2261e-05	1.89844	0.924812	1.89844	14.3511	7.55941	1.60755	2.24195
RREB1	6	7107597	7251981	144384	+	63.4094	16.7944	9.60186	10.5682	2.7085e-07	9.75797e-06	0.416142	-1.26485	-2.40303	6.21108	14.9254	-2.85612	-2.02181
RRP12	10	97356358	97426077	69719	-	76.8357	18.0979	11.9527	12.8059	2.20687e-06	4.06334e-05	0.483128	-1.04952	-2.06984	8.34306	17.2688	-2.47539	-1.73074
RRP9	3	51933429	51941905	8476	-	33.5844	7.95156	5.3526	5.5974	0.00130032	0.00519993	0.597249	-0.743595	-1.67434	4.186	7.0088	-2.19844	-1.27518
RRS1	8	66429014	66430734	1720	+	146.838	34.6007	22.643	24.473	1.39925e-08	1.2985e-06	0.451584	-1.14693	-2.21443	15.227	33.719	-2.4914	-1.96824
RSAD1	17	50478860	50485975	7115	+	230.858	48.4665	37.5522	38.4763	1.66821e-06	3.31024e-05	0.645941	-0.630527	-1.54813	30.1996	46.753	-1.71741	-1.39553
RTL8C	X	135032355	135033547	1192	+	111.378	26.4679	17.8779	18.563	6.02849e-05	0.000489087	1.66681	0.737086	1.66681	23.2045	13.9215	1.3938	1.99329
RTN1	14	59595976	59870777	274801	-	673.904	159.065	102.768	112.317	1.3586e-10	9.99401e-08	2.34956	1.23239	2.34956	157.571	67.064	2.16524	2.54957
RTN2	19	45485294	45497056	11762	-	45.0327	10.5556	7.22481	7.50544	0.000408964	0.00210758	1.66228	0.73316	1.66228	9.37252	5.63837	1.33633	2.06773
RTN4	2	54972187	55112622	140435	-	4606.27	976.066	745.714	767.712	4.55541e-08	2.97818e-06	1.61561	0.692077	1.61561	948.401	587.024	1.49183	1.74966
RUFY2	10	68341107	68407295	66188	-	180.488	43.3302	28.3234	30.0813	2.65899e-07	9.6419e-06	1.98721	0.990743	1.98721	40.0226	20.1401	1.7351	2.27594
RUFY3	4	70704204	70808620	104416	+	648.457	154.286	101.01	108.076	2.65974e-09	5.14204e-07	2.09382	1.06614	2.09382	146.287	69.8658	1.90702	2.29892
RUNDC3A	17	44308413	44318671	10258	+	118.621	28.033	18.8579	19.7702	1.14321e-05	0.00014001	1.80257	0.850058	1.80257	25.4318	14.1086	1.52081	2.13654
RUNX1	21	34787801	36004668	1216867	-	6.84323	1.86613	1.05776	1.14054	0.00726533	0.0205307	0.521661	-0.938816	-1.91695	0.782006	1.49907	-2.99694	-1.22616
RUSC1	1	155320894	155331115	10221	+	91.3573	22.5553	14.3382	15.2262	2.53595e-06	4.51154e-05	1.96995	0.97816	1.96995	20.1989	10.2535	1.66529	2.33036
RUSC2	9	35490111	35561899	71788	+	78.1142	21.1284	11.9013	13.019	5.04463e-06	7.6449e-05	2.26527	1.17968	2.26527	18.0638	7.97425	1.82212	2.8162
RYR2	1	237042184	237833989	791805	+	271.462	65.2811	42.3939	45.2436	1.09151e-08	1.15401e-06	2.06377	1.04528	2.06377	60.9526	29.5347	1.85862	2.29155
S100A6	1	153534599	153536245	1646	-	26.7074	6.07066	4.29326	4.45123	0.000205755	0.0012571	1.6904	0.757361	1.6904	5.59348	3.30898	1.36919	2.08696
S1PR1	1	101236865	101243714	6849	+	7.22599	2.26523	1.06343	1.20433	0.000321895	0.00175866	2.61152	1.38489	2.61152	1.74172	0.666939	1.74705	3.90374
SAMD12	8	118189455	118622113	432658	-	59.3029	13.6253	9.35813	9.88382	8.71247e-07	2.0975e-05	1.94432	0.959264	1.94432	13.0538	6.71383	1.67727	2.25388
SAMD14	17	50110040	50129883	19843	-	49.5135	14.588	7.62464	8.25225	0.000222977	0.00133225	2.04124	1.02944	2.04124	11.0776	5.4269	1.53423	2.7158
SAMD4A	14	54566117	54793316	227199	+	86.3189	20.8846	13.056	14.3865	4.69727e-08	3.02155e-06	2.42924	1.28051	2.42924	20.3825	8.39047	2.0945	2.81749
SCARB1	12	124776856	124882669	105813	-	131.759	29.2334	21.237	21.9598	4.68157e-06	7.26556e-05	0.602618	-0.730685	-1.65943	16.5147	27.4049	-1.89752	-1.45121
SCARB2	4	76158737	76234537	75800	-	3142.81	669.578	511.845	523.801	2.27789e-07	8.73276e-06	1.52926	0.612836	1.52926	633.409	414.192	1.40813	1.66082
SCG2	2	223596940	223602362	5422	-	1341.9	316.77	204.246	223.65	2.10517e-11	5.69786e-08	2.37498	1.24791	2.37498	314.765	132.534	2.21555	2.54588
SCLY	2	238060924	238099414	38490	+	71.1494	16.617	11.4594	11.8582	4.83809e-05	0.000413985	0.6061	-0.722372	-1.64989	8.94998	14.7665	-1.95591	-1.39175
SCN2A	2	165194993	165392311	197318	+	9.44466	2.48578	1.43423	1.57411	0.000631493	0.00296325	2.24533	1.16693	2.24533	2.17814	0.970076	1.54694	3.25902
SCN3A	2	165087522	165204068	116546	-	162.929	38.7443	24.8954	27.1549	1.20605e-08	1.209e-06	2.31547	1.21131	2.31547	37.929	16.3807	2.04766	2.61831
SCN3B	11	123629187	123655245	26058	-	912.947	189.865	148.177	152.158	4.71106e-08	3.02155e-06	1.58516	0.66463	1.58516	186.599	117.716	1.468	1.71167
SCN5A	3	38548057	38649688	101631	-	144.481	35.9963	22.5784	24.0801	3.89191e-07	1.22202e-05	2.0342	1.02446	2.0342	32.2877	15.8724	1.76049	2.35047
SCN9A	2	166195185	166376002	180817	-	75.8595	19.4863	10.8247	12.6433	2.03721e-09	4.49205e-07	3.13348	1.64777	3.13348	19.169	6.11748	2.72161	3.60769
SCUBE1	22	43197280	43343373	146093	-	28.6422	9.78548	3.19086	4.7737	3.90877e-09	6.27346e-07	6.7258	2.74971	6.7258	8.31162	1.23578	5.24273	8.62842
SCUBE3	6	35213956	35253080	39124	+	14.2626	3.4431	2.30879	2.3771	0.00692356	0.0197881	1.54621	0.628734	1.54621	2.88703	1.86717	1.16448	2.05308
SDC2	8	96493813	96611791	117978	+	194.595	45.3029	31.3191	32.4324	4.30722e-06	6.87378e-05	1.67035	0.740147	1.67035	40.574	24.2908	1.46136	1.90921
SDCBP2-AS1	20	1325405	1378736	53331	+	10.6258	2.71593	1.69612	1.77097	0.00334195	0.0110255	1.72829	0.789348	1.72829	2.24372	1.29823	1.25972	2.37117
SDK2	17	73334384	73644446	310062	-	48.596	11.9682	7.87535	8.09933	0.00170822	0.00647907	1.51447	0.598811	1.51447	9.75648	6.44219	1.22106	1.87837
SECISBP2L	15	48988476	49046448	57972	-	691.839	146.787	112.745	115.306	7.44173e-07	1.85206e-05	1.51861	0.602748	1.51861	139.049	91.5637	1.38596	1.66395
SELENBP1	1	151364304	151372708	8404	-	13.7586	3.31433	2.20752	2.29311	0.00752843	0.0211067	1.61576	0.692215	1.61576	2.83292	1.7533	1.18108	2.21042
SELENOTP1	9	6278667	6279154	487	+	29.739	6.82776	4.77397	4.9565	0.000385776	0.00201106	1.6769	0.745798	1.6769	6.20984	3.70316	1.34	2.09851
SELENOW	19	47778585	47784687	6102	+	96.2782	22.7854	15.3205	16.0464	2.30525e-06	4.21581e-05	1.82163	0.865227	1.82163	20.7189	11.3738	1.57279	2.10983
SEMA4G	10	100969518	100985872	16354	+	35.005	8.89637	5.45378	5.83416	8.95933e-05	0.000655742	2.00089	1.00064	2.00089	7.78003	3.88829	1.55985	2.56663
SEMA6C	1	151131685	151146665	14980	-	26.6292	7.47504	3.84706	4.4382	5.15279e-06	7.74807e-05	2.87213	1.52212	2.87213	6.58402	2.29238	2.17668	3.78979
SEPTIN4	17	58520250	58544369	24119	-	14.429	3.4064	2.27421	2.40484	0.00059882	0.00284445	1.87878	0.909797	1.87878	3.13895	1.67073	1.39889	2.52329
SEPTIN5	22	19714503	19724225	9722	+	67.2745	16.5662	10.6858	11.2124	2.49338e-05	0.000251064	1.81271	0.858149	1.81271	14.4522	7.97268	1.50425	2.18443
SERBP1	1	67407810	67430416	22606	-	7165.72	1682.2	1129.72	1194.29	2.42151e-07	9.10287e-06	0.521041	-0.940532	-1.91924	818.219	1570.36	-2.18056	-1.68923
SERBP1P1	X	68783472	68785067	1595	+	405.798	89.4167	64.763	67.633	1.40743e-08	1.2985e-06	0.553621	-0.85303	-1.80629	48.201	87.065	-1.97164	-1.65481
SERBP1P5	4	78180866	78182047	1181	-	397.652	89.4977	63.7068	66.2753	1.47031e-07	6.43937e-06	0.572557	-0.804509	-1.74655	48.2608	84.2899	-1.93762	-1.57432
SERBP1P6	5	42465400	42468869	3469	-	79.1949	17.7771	12.5792	13.1992	1.41241e-06	2.92948e-05	0.539274	-0.890909	-1.85434	9.24847	17.1498	-2.14237	-1.60504
SERINC1	6	122443351	122471808	28457	-	4092.06	878.387	665.586	682.009	5.33256e-07	1.51608e-05	1.54145	0.624287	1.54145	827.31	536.709	1.40648	1.68937
SERINC2	1	31409565	31434681	25116	+	14.0645	3.94143	2.09085	2.34409	0.00616071	0.0179683	2.15475	1.10752	2.15475	3.20211	1.48607	1.33811	3.46978
SERP2	13	44373665	44397715	24050	+	11.0492	2.49175	1.79812	1.84154	0.0119892	0.0307991	1.50088	0.585808	1.50088	2.21036	1.47271	1.11823	2.01446
SERPINB6	6	2948159	2972166	24007	-	33.09	7.273	5.28316	5.515	9.86658e-05	0.000706105	1.75747	0.813498	1.75747	7.02996	4.00005	1.42303	2.17051
SERPINF1	17	1762029	1777566	15537	+	117.256	27.4255	18.4908	19.5427	5.06239e-07	1.46387e-05	0.5166	-0.952881	-1.93573	13.3136	25.7717	-2.22367	-1.68508
SERPING1	11	57597387	57614849	17462	+	204.138	44.7883	32.9975	34.023	8.48081e-06	0.00011072	1.61113	0.688076	1.61113	41.9861	26.06	1.40931	1.84187
SETD6	16	58515479	58523843	8364	+	182.375	39.2525	29.5936	30.3958	1.5093e-06	3.08074e-05	0.631415	-0.663339	-1.58374	23.5285	37.2631	-1.76428	-1.42169
SEZ6L	22	26169462	26383598	214136	+	2639.09	601.136	415.517	439.849	1.17362e-09	3.63284e-07	1.96974	0.978006	1.96974	583.477	296.22	1.81957	2.13231
SEZ6L2	16	29871159	29899548	28389	-	121.714	31.3012	19.2575	20.2857	0.000134496	0.000902513	1.79836	0.846684	1.79836	26.0732	14.4983	1.44536	2.23758
SFXN2	10	102714538	102743493	28955	+	23.5085	5.85036	3.61364	3.91808	4.31779e-05	0.000380173	0.460389	-1.11908	-2.17208	2.47036	5.36581	-2.82491	-1.67011
SFXN3	10	101031234	101041245	10011	+	79.6068	19.9786	12.1836	13.2678	1.6617e-07	7.13898e-06	2.28778	1.19395	2.28778	18.4646	8.07098	1.95866	2.6722
SFXN5	2	72942036	73075620	133584	-	21.8468	4.92542	3.52739	3.64114	0.00180683	0.00678276	1.58773	0.666965	1.58773	4.46812	2.81416	1.2373	2.03741
SGCB	4	52020706	52038300	17594	-	1001.95	214.982	162.723	166.992	5.86388e-07	1.59992e-05	1.56348	0.644763	1.56348	203.699	130.285	1.42117	1.72005
SGCZ	8	14084845	15238432	1153587	-	14.3565	3.33314	2.31065	2.39275	0.00982145	0.0262416	1.57231	0.652886	1.57231	2.92511	1.86039	1.15316	2.14381
SGIP1	1	66533383	66751140	217757	+	67.0511	18.0248	9.76588	11.1752	1.88489e-07	7.7769e-06	2.82705	1.4993	2.82705	16.5103	5.8401	2.31564	3.4514
SGMS1-AS1	10	50623466	50641452	17986	+	20.3039	4.54688	3.23089	3.38399	0.000104869	0.000741481	1.83017	0.871975	1.83017	4.3766	2.39137	1.46025	2.29379
SGPP2	2	222424543	222562622	138079	+	71.3499	16.111	11.5544	11.8917	0.000205676	0.0012571	1.56289	0.644217	1.56289	14.5034	9.27987	1.30602	1.87028
SGSH	17	80206716	80220924	14208	-	20.7388	4.48506	3.34484	3.45646	0.00167038	0.00635872	1.6004	0.67843	1.6004	4.25452	2.65841	1.242	2.06222
SH2D3C	9	127738317	127778711	40394	-	10.0109	3.72861	1.20908	1.66848	1.25732e-05	0.000151382	4.98108	2.31646	4.98108	2.77904	0.557918	3.1404	7.90065
SH3BGRL3	1	26280086	26281523	1437	+	47.6857	11.5535	7.47317	7.94762	4.03147e-05	0.000360833	1.94935	0.962992	1.94935	10.5058	5.38941	1.56136	2.43375
SH3BP1	22	37634654	37656120	21466	+	9.17458	2.49667	1.3901	1.5291	0.000560078	0.00269542	2.25732	1.17461	2.25732	2.11933	0.938867	1.54583	3.2963
SH3BP4	2	234952017	235055715	103698	+	493.279	108.727	78.9664	82.2131	6.78544e-08	3.92851e-06	1.75903	0.814778	1.75903	104.83	59.5957	1.59547	1.93936
SH3GLB2	9	129007036	129028304	21268	-	18.4738	4.41908	2.93086	3.07897	0.0119742	0.0307991	1.62666	0.701915	1.62666	3.81355	2.3444	1.14179	2.31743
SH3RF3	2	109129205	109504635	375430	+	15.4858	4.18606	2.45584	2.58096	0.00357225	0.0115765	0.57839	-0.789886	-1.72894	1.89155	3.27037	-2.37984	-1.25606
SHANK2	11	70467856	71252578	784722	-	332.831	68.3164	54.2131	55.4719	6.13347e-07	1.64365e-05	1.53251	0.615892	1.53251	67.1358	43.8079	1.39826	1.67964
SHB	9	37915898	38069228	153330	-	66.5288	15.0062	10.7069	11.0881	0.000125616	0.000857267	1.64257	0.715955	1.64257	13.7843	8.39193	1.3623	1.9805
SHC1	1	154962298	154974396	12098	-	328.762	72.8045	52.8045	54.7937	3.58602e-07	1.15272e-05	1.71165	0.775389	1.71165	69.1738	40.4135	1.53458	1.90916
SHC4	15	48823741	48963920	140179	-	26.4396	6.27147	4.11633	4.40661	1.15733e-05	0.000141228	2.08434	1.05959	2.08434	5.9558	2.85741	1.68221	2.58258
SHD	19	4279266	4290723	11457	+	118.975	30.6106	18.4183	19.8292	4.36367e-06	6.92304e-05	2.09994	1.07035	2.09994	26.8652	12.7933	1.73289	2.54473
SHF	15	45167214	45201176	33962	-	213.43	47.0438	34.4484	35.5717	3.92153e-06	6.38629e-05	1.63738	0.711385	1.63738	44.1684	26.9751	1.44177	1.85952
SHISA5	3	48467798	48504827	37029	-	103.521	25.3173	16.3918	17.2534	1.25988e-05	0.000151555	1.8458	0.884247	1.8458	22.3813	12.1255	1.54399	2.20661
SHISA6	17	11241213	11564064	322851	+	100.695	21.3125	16.3267	16.7824	7.69419e-06	0.000102789	1.5912	0.670118	1.5912	20.6115	12.9534	1.39779	1.81138
SHISA7	19	55428740	55442864	14124	-	16.7714	3.49846	2.70336	2.79523	0.0047291	0.0144892	1.56478	0.645963	1.56478	3.41076	2.1797	1.17214	2.08896
SHMT2	12	57229573	57234936	5363	+	499.75	109.583	80.5413	83.2916	2.91207e-06	5.03952e-05	0.606684	-0.720984	-1.64831	62.9018	103.681	-1.86954	-1.45325
SIDT2	11	117178736	117197446	18710	+	26.8347	6.02536	4.36607	4.47246	0.0012227	0.00495413	1.51923	0.603337	1.51923	5.39425	3.55066	1.22936	1.87744
SIGMAR1	9	34634722	34637810	3088	-	373.235	81.7021	60.6115	62.2058	2.2267e-05	0.000232335	0.651364	-0.618464	-1.53524	49.0729	75.3387	-1.7568	-1.34162
SILC1	2	5932543	6003511	70968	+	22.9735	5.39112	3.68049	3.82892	0.00227043	0.00810064	1.63567	0.709877	1.63567	4.75238	2.90547	1.23973	2.15805
SINHCAFP1	18	26255698	26256356	658	-	10.6407	2.28138	1.72736	1.77345	0.0127526	0.0323731	0.662496	-0.594017	-1.50944	1.41342	2.13348	-2.05793	-1.10714
SIPA1L1	14	71320449	71741230	420781	+	36.9211	8.62419	5.95025	6.15352	0.00040101	0.00207846	0.616204	-0.698519	-1.62284	4.69226	7.61478	-2.0066	-1.31247
SIRT2	19	38878555	38899863	21308	-	40.3564	8.83805	6.55568	6.72607	0.000455812	0.00228802	1.53914	0.622122	1.53914	8.15423	5.29792	1.27272	1.86132
SIX4	14	60709539	60724352	14813	-	83.1067	19.7121	12.8863	13.8511	1.35518e-07	6.12304e-06	0.465946	-1.10177	-2.14617	8.80505	18.8972	-2.47152	-1.86366
SLC10A4	4	48483343	48489527	6184	+	112.013	25.2612	17.813	18.6688	9.43481e-07	2.20662e-05	1.83559	0.876246	1.83559	24.1701	13.1675	1.60162	2.10374
SLC12A6	15	34229784	34338061	108277	-	230.84	50.4781	37.6235	38.4734	1.12067e-05	0.000137748	1.50574	0.590477	1.50574	46.2387	30.7082	1.33779	1.69478
SLC16A1	1	112911847	112957014	45167	-	3455.62	726.055	562.03	575.937	1.99374e-07	8.05413e-06	0.646023	-0.630342	-1.54793	452.082	699.792	-1.68338	-1.42338
SLC16A1-AS1	1	112956415	113047056	90641	+	52.2762	10.9946	8.46991	8.7127	0.000108472	0.000761779	0.631947	-0.662124	-1.58241	6.74772	10.6777	-1.88101	-1.33121
SLC16A10	6	111087503	111231195	143692	+	113.585	24.426	18.2508	18.9308	7.99441e-07	1.97064e-05	0.581841	-0.781304	-1.71868	13.9264	23.9351	-1.93659	-1.5253
SLC17A7	19	49429401	49442361	12960	-	14.5492	4.28098	2.2256	2.42487	0.000247364	0.00143365	2.18828	1.1298	2.18828	3.32863	1.52112	1.59408	3.00395
SLC19A2	1	169463909	169485945	22036	-	158.716	34.6629	25.8119	26.4527	1.0489e-05	0.000130707	0.649179	-0.623311	-1.54041	20.8256	32.0799	-1.74374	-1.36078
SLC19A3	2	227683763	227718029	34266	-	36.8813	8.67463	5.88367	6.14689	0.00130534	0.0052125	0.601536	-0.733277	-1.66241	4.61754	7.67624	-2.17363	-1.27143
SLC1A3	5	36606355	36688335	81980	+	76.5363	16.4918	12.4391	12.7561	2.57197e-05	0.000257064	0.642153	-0.639011	-1.55726	9.97634	15.5358	-1.792	-1.35328
SLC22A17	14	23346306	23352913	6607	-	46.641	11.6459	7.4637	7.7735	0.00116758	0.00478522	1.64756	0.720327	1.64756	9.67479	5.87221	1.28935	2.10527
SLC24A2	9	19507452	19786929	279477	-	40.9548	8.87943	6.65386	6.82579	0.000550264	0.00265764	1.53221	0.615615	1.53221	8.26041	5.39117	1.26394	1.85742
SLC24A3	20	19212642	19722927	510285	+	8.73579	2.30165	1.29892	1.45597	6.72559e-05	0.000532266	2.59639	1.37651	2.59639	2.10225	0.809681	1.85366	3.63673
SLC25A32	8	103398635	103415190	16555	-	284.453	60.7631	45.9429	47.4088	4.41343e-07	1.34049e-05	0.608205	-0.717371	-1.64418	35.8589	58.9587	-1.82298	-1.48292
SLC25A37	8	23528956	23575464	46508	+	150.813	31.7108	24.4975	25.1354	2.35875e-06	4.28469e-05	0.636615	-0.651507	-1.57081	19.5545	30.7163	-1.75536	-1.40566
SLC25A42	19	19063994	19113031	49037	+	7.20663	1.85751	1.07373	1.2011	0.000301184	0.00166568	2.48658	1.31416	2.48658	1.71322	0.688987	1.67735	3.68623
SLC25A45	11	65375192	65383702	8510	-	8.4114	1.99342	1.35986	1.4019	0.0197882	0.0461474	1.53692	0.620038	1.53692	1.6986	1.1052	1.08642	2.17421
SLC26A11	17	80219699	80253501	33802	+	22.6215	5.06351	3.65296	3.77026	0.000559776	0.00269493	1.62833	0.703394	1.62833	4.67158	2.86894	1.30275	2.03528
SLC27A2	15	50182196	50236386	54190	+	12.4411	3.12696	1.92183	2.07352	0.00299269	0.0100721	0.520246	-0.942734	-1.92217	1.41917	2.72788	-2.86161	-1.29114
SLC29A2	11	66362521	66372215	9694	-	21.3091	5.36476	3.2345	3.55152	1.80748e-05	0.000198383	0.42776	-1.22512	-2.33776	2.12809	4.97496	-3.03447	-1.80101
SLC29A4	7	5274369	5306871	32502	+	125.299	32.2214	19.9251	20.8831	0.000239654	0.00140036	1.72886	0.789819	1.72886	26.4609	15.3054	1.3878	2.15374
SLC2A11	22	23856703	23886310	29607	+	7.9539	1.79531	1.27086	1.32565	0.00705572	0.0200979	1.69229	0.758975	1.69229	1.66652	0.984776	1.18192	2.42303
SLC2A13	12	39755025	40106090	351065	-	52.7163	14.7603	7.54076	8.78605	4.57848e-07	1.36778e-05	0.331631	-1.59235	-3.0154	4.37618	13.1959	-3.78972	-2.39929
SLC2A3	12	7919230	7936188	16958	-	64.9451	13.9015	10.5951	10.8242	8.64288e-05	0.000638252	1.50168	0.586582	1.50168	12.9949	8.65352	1.29545	1.74075
SLC35F2	11	107790991	107928294	137303	-	257.936	56.1831	41.8455	42.9893	1.07285e-06	2.42761e-05	0.63149	-0.663169	-1.58356	33.2791	52.6994	-1.75749	-1.42684
SLC38A5	X	48458537	48470261	11724	-	48.1752	14.2223	6.45993	8.0292	3.39881e-08	2.37298e-06	0.25982	-1.94441	-3.84882	3.31182	12.7466	-4.78783	-3.09396
SLC39A14	8	22367249	22434130	66881	+	467.866	94.427	76.3271	77.9777	6.55952e-07	1.71842e-05	0.663205	-0.592474	-1.50783	62.1874	93.768	-1.64801	-1.37958
SLC39A8	4	102251041	102431259	180218	-	80.8539	22.2833	11.6574	13.4757	2.08497e-08	1.72048e-06	0.335799	-1.57433	-2.97797	6.77514	20.1762	-3.52121	-2.51853
SLC41A2	12	104802553	104958745	156192	-	59.1234	14.2532	9.43079	9.8539	3.3995e-05	0.000318597	1.7672	0.821468	1.7672	12.5859	7.12192	1.46842	2.12678
SLC43A1	11	57484534	57515781	31247	-	13.0052	3.53043	1.85687	2.16754	1.2627e-05	0.00015176	0.332151	-1.59009	-3.01068	1.08088	3.2542	-4.17904	-2.16897
SLC43A2	17	1569268	1628887	59619	-	21.8075	5.80001	3.3804	3.63458	3.70966e-05	0.000341748	2.1105	1.07758	2.1105	4.93218	2.33697	1.65267	2.69515
SLC44A2	19	10602457	10644558	42101	+	107.752	23.8902	17.4071	17.9587	4.50283e-06	7.06923e-05	1.63938	0.713152	1.63938	22.3091	13.6083	1.44006	1.8663
SLC44A3	1	94820342	94895247	74905	+	16.2841	3.95877	2.52001	2.71401	0.00037091	0.00195259	2.032	1.0229	2.032	3.63778	1.79024	1.4795	2.79083
SLC45A3	1	205657851	205680510	22659	-	15.5639	3.63129	2.49104	2.59398	0.00113157	0.00467786	0.582694	-0.77919	-1.71617	1.91003	3.27793	-2.24955	-1.30925
SLC47A1	17	19495385	19579035	83650	+	69.6884	14.6258	11.2791	11.6147	3.92359e-05	0.000354459	0.624922	-0.678251	-1.6002	8.93373	14.2957	-1.87331	-1.3669
SLC48A1	12	47753916	47782752	28836	+	42.7588	10.1269	6.82381	7.12647	0.000966411	0.0041532	1.66849	0.738541	1.66849	8.91174	5.3412	1.29312	2.15282
SLC4A8	12	51391317	51515764	124447	+	1561.88	356.897	243.808	260.313	3.94085e-10	1.97524e-07	2.07453	1.05278	2.07453	351.29	169.335	1.92053	2.24087
SLC66A3	2	11155198	11178871	23673	+	14.8143	3.63655	2.2472	2.46905	0.000784742	0.00350492	2.13666	1.09536	2.13666	3.36378	1.57431	1.45647	3.13452
SLC6A15	12	84859491	84913616	54125	-	2493.99	524.834	405.823	415.665	6.98137e-07	1.78937e-05	0.651654	-0.617821	-1.53456	327.999	503.332	-1.68459	-1.39789
SLC6A2	16	55655604	55706193	50589	+	144.91	39.9412	20.2976	24.1516	2.97808e-09	5.52752e-07	3.32587	1.73373	3.32587	37.1371	11.1661	2.85111	3.87968
SLC6A6	3	14402576	14489350	86774	+	147.065	30.2777	23.9747	24.5108	4.89396e-06	7.52613e-05	0.658094	-0.603634	-1.51954	19.4566	29.5651	-1.69818	-1.35969
SLC7A11	4	138164097	138242350	78253	-	56.8188	11.7866	9.2162	9.46979	0.000603576	0.00286101	0.657848	-0.604174	-1.52011	7.51539	11.4242	-1.85389	-1.24642
SLC7A2	8	17497088	17570574	73486	+	357.669	88.4896	53.6179	59.6115	1.40313e-10	9.99401e-08	0.392201	-1.35034	-2.54972	33.5867	85.6364	-2.78904	-2.33093
SLC9B2	4	103019868	103085830	65962	-	144.266	31.4704	23.348	24.0443	6.00093e-06	8.59372e-05	0.622339	-0.684227	-1.60684	18.4471	29.6416	-1.82802	-1.41242
SLCO3A1	15	91853708	92172436	318728	+	29.0417	6.40304	4.6457	4.84029	8.52078e-05	0.000630463	1.75437	0.810949	1.75437	6.16594	3.51463	1.42944	2.15315
SLCO4A1	20	62642503	62685786	43283	+	18.8463	4.19682	2.99916	3.14105	0.000431836	0.00219658	0.560986	-0.833963	-1.78258	2.25766	4.02444	-2.3117	-1.37456
SLITRK1	13	83877205	83882475	5270	-	43.0593	10.7132	6.72723	7.17655	5.51744e-06	8.16931e-05	0.491308	-1.0253	-2.03538	4.7286	9.6245	-2.4619	-1.68276
SLITRK4	X	143622790	143636102	13312	-	59.0151	13.9985	9.28626	9.83585	5.96461e-06	8.55075e-05	0.514028	-0.960082	-1.94542	6.67874	12.993	-2.32683	-1.62653
SLITRK5	13	87672615	87696273	23658	+	60.0578	13.9509	9.40516	10.0096	4.00454e-07	1.24583e-05	0.490834	-1.02669	-2.03735	6.59104	13.4282	-2.35822	-1.76014
SMAD3	15	67063763	67195170	131407	+	111.398	28.5453	16.3612	18.5663	3.82562e-09	6.27346e-07	0.359794	-1.47476	-2.77937	9.82506	27.3075	-3.17776	-2.43092
SMAGP	12	51244558	51270416	25858	-	32.4088	7.24293	5.18747	5.40146	0.000127438	0.000864907	1.72843	0.789464	1.72843	6.84354	3.95939	1.40102	2.13236
SMG1P1	16	22437008	22492221	55213	+	67.6939	15.6883	10.9326	11.2823	0.00158335	0.00609429	0.654953	-0.610537	-1.52683	8.93003	13.6346	-1.91412	-1.2179
SMG1P2	16	29527568	29594967	67399	-	39.5126	10.3497	6.08263	6.58544	0.000189607	0.00118083	0.486181	-1.04044	-2.05685	4.30865	8.86223	-2.75926	-1.53325
SMIM10L2A	X	135421944	135428076	6132	+	11.0582	2.53181	1.75913	1.84304	0.0194543	0.0455571	1.58	0.659927	1.58	2.25737	1.42871	1.06833	2.33674
SMIM14	4	39546336	39638903	92567	-	229.053	60.6087	35.0624	38.1755	1.90194e-07	7.81381e-06	2.25832	1.17525	2.25832	52.9184	23.4326	1.93366	2.6375
SMIM18	8	30638580	30646065	7485	+	46.1648	10.6333	7.20737	7.69413	3.47386e-05	0.000324219	1.98319	0.987821	1.98319	10.2299	5.15833	1.5763	2.49511
SMIM30	7	113116718	113118561	1843	-	194.178	43.4236	31.4945	32.363	2.4747e-05	0.00025085	0.642069	-0.639199	-1.55746	25.3087	39.4174	-1.79128	-1.35417
SMPD1	11	6390440	6394999	4559	+	17.2054	4.14289	2.74876	2.86757	0.000754649	0.00340649	1.7376	0.797096	1.7376	3.64019	2.09496	1.33565	2.26052
SMPD3	16	68358327	68448509	90182	-	64.0822	14.5168	10.3211	10.6804	0.000337821	0.00182504	1.60434	0.681979	1.60434	13.1588	8.20198	1.30546	1.97164
SMTN	22	31064105	31104758	40653	+	8.24553	2.0715	1.31459	1.37426	0.0080465	0.0223618	1.7031	0.768164	1.7031	1.73171	1.0168	1.18747	2.44264
SNAP23	15	42491233	42545357	54124	+	36.1596	10.1102	5.22705	6.02659	6.83395e-07	1.76833e-05	0.343767	-1.5405	-2.90895	3.08349	8.9697	-3.66695	-2.30763
SNAP91	6	83552880	83709692	156812	-	341.87	78.7649	54.0636	56.9783	1.31045e-08	1.27484e-06	1.91611	0.938183	1.91611	74.8784	39.0782	1.74126	2.10852
SNAPC1	14	61762420	61796429	34009	+	264.601	58.2178	42.7718	44.1002	1.10574e-06	2.47497e-05	0.614315	-0.70295	-1.62783	33.564	54.6365	-1.81853	-1.45713
SNED1	2	240998618	241095569	96951	+	25.9804	5.89329	4.08055	4.33006	0.000544011	0.00263308	1.8538	0.890483	1.8538	5.62553	3.0346	1.38377	2.48347
SNHG12	1	28578538	28583133	4595	-	12.7044	3.0261	2.03452	2.11741	0.00189931	0.00706332	0.585819	-0.771474	-1.70701	1.56438	2.67043	-2.27951	-1.2783
SNHG15	7	44983023	44986962	3939	-	101.892	24.3594	15.7004	16.9821	3.12912e-08	2.26452e-06	0.44948	-1.15367	-2.22479	10.5322	23.432	-2.52864	-1.95746
SNHG17	20	38419638	38435410	15772	-	61.1204	13.3939	9.69807	10.1867	7.89809e-06	0.000104951	0.541355	-0.885354	-1.84722	7.15558	13.2179	-2.1959	-1.5539
SNHG21	15	82750564	82757207	6643	+	8.91154	2.04713	1.43876	1.48526	0.0159406	0.0386904	0.645646	-0.631184	-1.54884	1.16544	1.80507	-2.18495	-1.09792
SNHG26	7	22854126	22872946	18820	+	27.2905	7.90243	4.01894	4.54841	5.02161e-06	7.6271e-05	0.374254	-1.41791	-2.67198	2.47736	6.61946	-3.45794	-2.06466
SNHG3	1	28505980	28510893	4913	+	116.921	25.767	18.7325	19.4868	6.08171e-07	1.63986e-05	0.570014	-0.81093	-1.75434	14.1499	24.8238	-1.97907	-1.55513
SNHG4	5	139274102	139284900	10798	+	56.0294	13.616	8.62779	9.33823	2.11069e-07	8.34251e-06	0.44805	-1.15827	-2.23189	5.77879	12.8977	-2.60559	-1.91179
SNN	16	11668455	11679153	10698	+	421.727	100.481	65.7687	70.2879	1.50816e-08	1.35207e-06	2.07307	1.05177	2.07307	94.8314	45.7444	1.85966	2.31096
SNRNP48	6	7590198	7611968	21770	+	220.174	46.789	35.7772	36.6956	1.37075e-05	0.000160609	0.648857	-0.624028	-1.54117	28.8808	44.5103	-1.75213	-1.35561
SNX15	11	65027439	65040573	13134	+	13.7446	5.61174	1.51466	2.29076	0.000450116	0.00226953	4.68357	2.22761	4.68357	3.77542	0.8061	2.20872	9.93148
SNX24	5	122843439	123029355	185916	+	100.289	20.9299	16.2631	16.7148	4.87527e-06	7.50592e-05	1.59506	0.673611	1.59506	20.5475	12.882	1.40914	1.80551
SNX29	16	11976734	12574288	597554	+	117.532	24.954	19.0788	19.5887	1.46613e-05	0.00016886	1.56471	0.645896	1.56471	23.9018	15.2755	1.36829	1.78932
SORBS2	4	185585444	185956653	371209	-	49.2204	12.0166	7.51373	8.2034	1.4323e-06	2.95477e-05	2.29614	1.19921	2.29614	11.4292	4.97758	1.88943	2.79039
SORD	15	45023147	45077186	54039	+	891.041	183.495	144.553	148.507	2.43325e-08	1.91448e-06	0.627275	-0.672829	-1.5942	114.492	182.522	-1.71473	-1.48213
SORT1	1	109309568	109397919	88351	-	1076.93	225.154	175.239	179.488	2.86216e-07	1.01397e-05	1.54203	0.624832	1.54203	217.76	141.216	1.41477	1.68074
SOS2	14	50117130	50231579	114449	-	464.848	104.114	74.6057	77.4746	4.2802e-08	2.83941e-06	1.73141	0.791951	1.73141	98.2206	56.7286	1.58165	1.89536
SOWAHA	5	132813302	132816787	3485	+	19.2759	4.28099	3.09286	3.21265	0.000571587	0.00273912	1.69803	0.763866	1.69803	4.04382	2.38147	1.32936	2.16895
SOX4	6	21593751	21598620	4869	+	2447.17	548.548	394.421	407.861	1.29529e-07	5.91612e-06	1.66666	0.736958	1.66666	509.826	305.897	1.51737	1.83064
SPACA9	9	132878027	132890202	12175	+	8.02465	2.01747	1.24145	1.33744	0.00222679	0.00797014	1.99973	0.999803	1.99973	1.78317	0.891709	1.34617	2.97058
SPOCK1	5	136975298	137598380	623082	-	34.5108	7.42974	5.52303	5.75181	5.77408e-05	0.000473293	1.74653	0.804492	1.74653	7.3152	4.18842	1.43677	2.12308
SPRED3	19	38388421	38399588	11167	+	18.4934	4.69526	2.81801	3.08223	3.9082e-05	0.000354014	2.2828	1.19081	2.2828	4.28666	1.8778	1.73119	3.01018
SPRY3	X	155767812	155782460	14648	+	37.3322	8.77126	5.92042	6.22203	3.67374e-05	0.000339142	1.84476	0.883433	1.84476	8.06968	4.37438	1.50552	2.26044
SPRY4	5	142310427	142326456	16029	-	53.2587	13.5332	7.86958	8.87645	6.78117e-08	3.92851e-06	2.70113	1.43356	2.70113	12.9563	4.79662	2.27518	3.20683
SPSB1	1	9292894	9369533	76639	+	7.93342	1.7669	1.27652	1.32224	0.0147609	0.0363	1.58545	0.664895	1.58545	1.62165	1.02283	1.10459	2.27565
SPSB4	3	141051347	141148612	97265	+	118.768	28.5855	18.7803	19.7947	3.90724e-06	6.37836e-05	1.87733	0.908679	1.87733	25.8302	13.7591	1.59512	2.20946
SPTBN1	2	54456317	54671447	215130	+	1416.39	291.449	230.79	236.065	6.33443e-07	1.67757e-05	1.518	0.602174	1.518	284.628	187.502	1.38709	1.66127
SPTBN4	19	40466241	40576465	110224	+	13.4326	3.82068	2.11543	2.23877	0.017704	0.0422555	1.68157	0.74981	1.68157	2.8078	1.66975	1.14314	2.47361
SRC	20	37344685	37406051	61366	+	118.783	27.5727	19.3116	19.7971	0.000272536	0.00154774	1.50165	0.586548	1.50165	23.767	15.8273	1.27076	1.77449
SRCIN1	17	38530031	38605953	75922	-	17.2583	4.6032	2.51096	2.87638	4.51281e-06	7.0767e-05	2.83846	1.50511	2.83846	4.25404	1.49872	2.15255	3.74293
SREBF2	22	41833079	41907308	74229	+	878.68	186.507	142.966	146.447	1.73791e-06	3.3814e-05	1.53278	0.616155	1.53278	177.252	115.641	1.38471	1.69669
SRFBP1	5	121961975	122075571	113596	+	178.355	39.248	28.8788	29.7259	5.67851e-06	8.31681e-05	0.625692	-0.676475	-1.59823	22.8817	36.5701	-1.8128	-1.40906
SRM	1	11054584	11060021	5437	-	48.0172	11.0954	7.60241	8.00287	0.00013458	0.000902513	0.554465	-0.850831	-1.80354	5.70912	10.2966	-2.27306	-1.431
SRP14-AS1	15	40039242	40076540	37298	+	12.4055	2.63145	2.01619	2.06758	0.00347478	0.011353	1.56139	0.642833	1.56139	2.52074	1.61442	1.19893	2.03343
SRPX	X	38149336	38220925	71589	-	7.34144	1.80942	1.11899	1.22357	0.00322623	0.0107169	0.482217	-1.05225	-2.07376	0.796142	1.65101	-3.25375	-1.3217
SSH2	17	29625938	29930277	304339	-	340.7	71.8952	55.3858	56.7834	6.50149e-07	1.70844e-05	1.55752	0.639254	1.55752	69.1618	44.405	1.41544	1.71387
ST3GAL2	16	70375977	70439238	63261	-	58.3916	11.8241	9.51113	9.73193	0.000193276	0.00120037	1.50681	0.591497	1.50681	11.6995	7.76439	1.27644	1.77876
ST3GAL3	1	43705824	43931166	225342	+	14.1484	3.53593	2.26691	2.35807	0.0123715	0.0316085	1.56681	0.647828	1.56681	2.87878	1.83736	1.12206	2.18784
ST3GAL6	3	98732236	98821202	88966	+	100.55	22.8546	16.3072	16.7584	0.000301592	0.00166726	0.653325	-0.614127	-1.53063	13.2444	20.2724	-1.82771	-1.28184
ST7	7	116953238	117230104	276866	+	270.186	61.1236	42.9258	45.0309	1.73181e-06	3.37702e-05	1.8205	0.864337	1.8205	58.1307	31.9311	1.57604	2.10288
ST8SIA1	12	22063773	22437042	373269	-	35.1422	7.76257	5.67111	5.85703	0.00010145	0.000723351	1.64966	0.722169	1.64966	7.2931	4.42097	1.37085	1.98518
ST8SIA2	15	92393881	92468729	74848	+	449.318	110.014	67.9435	74.8864	7.27776e-09	8.72707e-07	2.42243	1.27645	2.42243	106.011	43.7622	2.14091	2.74096
STAR	8	38142700	38150993	8293	-	8.77551	2.2263	1.38121	1.46258	0.00778412	0.0217156	1.77049	0.824149	1.77049	1.86934	1.05583	1.19357	2.62628
STEAP1B	7	22419444	22727614	308170	-	8.2909	1.967	1.33739	1.38182	0.0139144	0.0347103	0.629123	-0.668587	-1.58952	1.06724	1.69639	-2.2382	-1.12883
STK26	X	132023302	132075944	52642	+	63.949	15.6174	9.79124	10.6582	9.86497e-06	0.000124604	0.455687	-1.13389	-2.19449	6.67285	14.6435	-2.76084	-1.74432
STK32A	5	147234963	147387856	152893	+	43.4466	9.86766	7.05759	7.2411	0.00062997	0.00295815	1.5265	0.610226	1.5265	8.75008	5.73212	1.25708	1.85367
STMN2	8	79611117	79666159	55042	+	658.378	190.201	80.5581	109.73	1.48749e-13	2.01302e-09	5.22631	2.38579	5.22631	184.212	35.2471	4.80531	5.68419
STMN3	20	63639705	63657683	17978	-	179.356	50.0363	27.935	29.8926	7.09185e-05	0.000552209	1.95754	0.969039	1.95754	39.5707	20.2145	1.55075	2.47102
STMN4	8	27235323	27258421	23098	-	57.2745	18.8728	5.61629	9.54576	4.43088e-11	7.54772e-08	9.4014	3.23288	9.4014	17.256	1.83548	7.75195	11.4018
STOX1	10	68827531	68895433	67902	+	18.2734	5.20161	2.7802	3.04557	0.000125563	0.000857267	2.24376	1.16592	2.24376	4.21334	1.8778	1.65194	3.04761
STRA6	15	74179466	74212268	32802	-	38.5212	10.012	5.52535	6.4202	2.07263e-07	8.23108e-06	3.02182	1.59542	3.02182	9.64772	3.19268	2.43903	3.74387
STS	X	7147237	7804359	657122	+	166.1	34.8379	27.0122	27.6833	1.60882e-06	3.21597e-05	1.55731	0.639054	1.55731	33.7162	21.6503	1.4025	1.7292
SUGCT	7	40134977	40860764	725787	+	23.4038	5.6185	3.76507	3.90064	0.000740603	0.00335878	0.605005	-0.724982	-1.65288	2.94068	4.86059	-2.09265	-1.30553
SULF2	20	47656348	47786617	130269	-	335.082	76.3045	52.4126	55.8471	7.28707e-09	8.72707e-07	0.488795	-1.0327	-2.04585	36.671	75.0232	-2.2606	-1.85149
SULT4A1	22	43824509	43862514	38005	-	55.8516	13.9533	8.69364	9.30861	9.24227e-07	2.18664e-05	2.09399	1.06625	2.09399	12.6	6.01722	1.77602	2.46889
SUOX	12	55997180	56006642	9462	+	38.0838	8.68354	6.06871	6.3473	3.0568e-05	0.000293179	1.79997	0.847973	1.79997	8.16077	4.53383	1.48702	2.17878
SV2A	1	149903318	149917845	14527	-	566.001	123.548	91.8804	94.3335	7.60937e-06	0.000102363	1.55117	0.633359	1.55117	114.714	73.9531	1.37388	1.75135
SVBP	1	42807052	42817398	10346	-	49.4524	10.6462	7.92842	8.24207	5.79132e-05	0.000474418	1.7077	0.772053	1.7077	10.3963	6.08788	1.41481	2.06122
SVIP	11	22813799	22830300	16501	-	259.768	61.9681	42.0712	43.2946	0.000255253	0.00146868	1.52849	0.612107	1.52849	52.3438	34.2454	1.28376	1.81988
SVOP	12	108907741	109021069	113328	-	110.068	25.1431	17.4869	18.3447	5.91028e-06	8.50892e-05	1.82052	0.864352	1.82052	23.6814	13.008	1.54723	2.14209
SYBU	8	109573978	109691792	117814	-	136.576	29.8282	22.002	22.7627	7.37289e-07	1.84773e-05	1.68425	0.752109	1.68425	28.5652	16.9602	1.5031	1.88724
SYN1	X	47571901	47619858	47957	-	95.7217	22.0029	15.27	15.9536	1.30183e-05	0.000154949	1.7688	0.82277	1.7688	20.3834	11.5239	1.49667	2.0904
SYNE3	14	95407266	95475837	68571	-	40.6282	9.24184	6.47529	6.77136	7.06117e-05	0.000550454	1.77494	0.827771	1.77494	8.66236	4.88037	1.44683	2.17746
SYNGR1	22	39349925	39385576	35651	+	53.8358	12.2904	8.68473	8.97263	0.000113762	0.000792353	1.62899	0.703977	1.62899	11.1193	6.82591	1.35831	1.95361
SYNPO	5	150601080	150659208	58128	+	19.2701	5.0287	2.86101	3.21169	6.16312e-06	8.77519e-05	2.60552	1.38157	2.60552	4.64184	1.78154	2.00435	3.38701
SYP	X	49187804	49200260	12456	-	291.328	66.4689	46.9481	48.5547	2.16611e-06	4.01011e-05	1.65679	0.728386	1.65679	60.558	36.5515	1.46496	1.87372
SYPL1	7	106090503	106112577	22074	-	181.486	39.2438	29.4791	30.2476	9.72657e-05	0.000699414	0.65825	-0.603292	-1.51918	24.0139	36.4814	-1.7742	-1.30081
SYT11	1	155859567	155885200	25633	+	1883.1	504.73	261.05	313.849	1.06959e-12	7.23739e-09	3.49142	1.80381	3.49142	487.944	139.755	3.23534	3.76777
SYT17	16	19167971	19268333	100362	+	77.1566	19.2411	11.5746	12.8594	1.89647e-08	1.61661e-06	2.53588	1.34249	2.53588	18.4452	7.27367	2.20012	2.92289
SYT2	1	202590596	202710455	119859	-	58.7743	16.8056	8.46062	9.79572	6.43658e-08	3.80261e-06	0.334586	-1.57955	-2.98877	4.91165	14.6798	-3.60321	-2.4791
SYT9	11	7238778	7469044	230266	+	13.5816	3.77464	1.84121	2.2636	8.94506e-06	0.000114961	3.56038	1.83203	3.56038	3.53447	0.992724	2.46668	5.13902
SYTL4	X	100674491	100732124	57633	-	861.251	186.764	138.036	143.542	1.22015e-08	1.21414e-06	1.75052	0.807783	1.75052	182.709	104.374	1.61277	1.90003
TAF1D	11	93729948	93784392	54444	-	429.998	94.0692	69.6256	71.6663	4.01423e-05	0.000360004	0.640995	-0.641614	-1.56007	55.9877	87.3449	-1.80982	-1.34479
TAF4B	18	26226445	26391686	165241	+	128.223	34.9565	18.9386	21.3705	8.63116e-09	9.57422e-07	0.369954	-1.43458	-2.70304	11.5422	31.1989	-3.10998	-2.34934
TAFA3	1	112720419	112727236	6817	+	11.7799	3.36036	1.53869	1.96332	8.99698e-07	2.14359e-05	4.2053	2.07221	4.2053	3.17228	0.754352	3.04832	5.80143
TAFA4	3	68731766	68953298	221532	-	28.6448	6.99929	4.54864	4.77414	0.0020042	0.00735834	0.59067	-0.759575	-1.69299	3.5456	6.00267	-2.26542	-1.2652
TAGLN3	3	111998739	112013888	15149	+	249.162	56.7108	39.9009	41.527	3.70731e-06	6.09611e-05	1.72578	0.78725	1.72578	52.5843	30.4698	1.49986	1.98573
TANC1	2	158968640	159232660	264020	+	120.493	26.5685	19.3709	20.0822	3.67675e-06	6.0606e-05	0.590166	-0.760806	-1.69444	14.9064	25.258	-1.94207	-1.47838
TANGO2	22	20017014	20067165	50151	+	20.8444	4.8685	3.35617	3.47407	0.00111369	0.00461893	1.63986	0.713576	1.63986	4.31613	2.63201	1.28286	2.09623
TARBP1	1	234391313	234479180	87867	-	152.005	32.2345	24.7028	25.3341	1.94485e-05	0.000209385	0.648944	-0.623835	-1.54097	19.9405	30.7277	-1.76189	-1.34774
TASOR2	10	5684838	5763741	78903	+	1405.02	287.556	229.101	234.17	7.7382e-08	4.2308e-06	0.658253	-0.603286	-1.51917	185.91	282.429	-1.63437	-1.41209
TBC1D4	13	75283503	75482170	198667	-	176.329	42.5187	26.9727	29.3881	2.88572e-08	2.11094e-06	0.43602	-1.19753	-2.29347	17.8463	40.93	-2.61782	-2.00931
TBC1D9	4	140620782	140756386	135604	-	223.78	48.7458	35.8976	37.2966	1.7782e-07	7.40444e-06	1.7366	0.796268	1.7366	47.3356	27.2576	1.56388	1.9284
TBCK	4	106041599	106316684	275085	-	231.329	47.9758	37.46	38.5548	1.29613e-06	2.77101e-05	1.60627	0.683714	1.60627	47.5234	29.5862	1.43878	1.79325
TBX4	17	61452404	61485111	32707	+	9.7503	2.36831	1.51884	1.62505	0.000330202	0.00179103	2.06782	1.04811	2.06782	2.19068	1.05942	1.51546	2.82149
TCAF1	7	143851375	143902199	50824	-	2172.58	445.018	353.642	362.096	1.33745e-07	6.07372e-06	1.53951	0.622467	1.53951	439.022	285.171	1.42154	1.66726
TCAF1P1	7	143598039	143604840	6801	+	29.7985	7.60611	4.5241	4.96642	0.00256692	0.0089345	1.9635	0.973424	1.9635	6.58111	3.35173	1.30489	2.9545
TCEAL7	X	103330229	103332327	2098	+	385.518	92.6242	61.7045	64.253	2.10714e-06	3.96054e-05	1.73416	0.794236	1.73416	81.5058	47.0002	1.51851	1.98044
TCF19	6	31158547	31167160	8613	+	156.54	34.5234	25.2665	26.0899	1.30945e-06	2.79066e-05	1.65328	0.725334	1.65328	32.5137	19.6661	1.47203	1.85686
TCF7L2	10	112950247	113167679	217432	+	18.2326	5.09475	2.66949	3.03876	3.48414e-06	5.80676e-05	0.359474	-1.47604	-2.78184	1.60703	4.4705	-3.61252	-2.14217
TCN2	22	30607003	30627272	20269	+	10.8957	2.57784	1.74591	1.81595	0.00170954	0.00648074	1.72888	0.789837	1.72888	2.30098	1.33091	1.29277	2.31211
TCP11L1	11	33039417	33105944	66527	+	217.167	49.4704	34.2741	36.1945	1.43546e-07	6.34837e-06	1.92738	0.946645	1.92738	47.6608	24.7282	1.7061	2.17738
TCP11L2	12	106301929	106347004	45075	+	13.823	3.55242	2.06069	2.30383	3.65752e-05	0.000338095	2.52289	1.33507	2.52289	3.29974	1.30792	1.8507	3.43922
TCTA	3	49412206	49416476	4270	+	59.3179	14.638	9.34534	9.88632	4.17927e-06	6.74918e-05	1.93812	0.954655	1.93812	13.0429	6.7297	1.63246	2.30101
TECPR2	14	102362941	102502478	139537	+	57.7269	13.7233	9.06099	9.62115	9.5436e-06	0.000121271	1.96195	0.97229	1.96195	12.7458	6.49649	1.62077	2.37495
TENM4	11	78652829	79441031	788202	-	516.57	118.648	81.4456	86.0951	1.2319e-07	5.7747e-06	1.93043	0.948921	1.93043	113.431	58.7594	1.71102	2.17797
TEX15	8	30831544	30913004	81460	-	320.048	73.3984	51.0017	53.3414	3.12941e-07	1.06141e-05	0.55398	-0.852095	-1.80512	38.0314	68.6513	-2.03236	-1.60328
TFAP4	16	4257186	4273076	15890	-	35.493	8.84	5.5771	5.91549	0.000127394	0.000864907	0.526398	-0.925774	-1.8997	4.08007	7.75092	-2.42769	-1.48654
TFB2M	1	246540561	246566262	25701	-	229.259	48.7535	37.0149	38.2098	2.13076e-07	8.37323e-06	0.603644	-0.728231	-1.65661	28.7658	47.6537	-1.82625	-1.50272
TFE3	X	49028726	49043411	14685	-	70.7643	15.3744	11.5016	11.7941	0.000242446	0.00141302	1.52038	0.604435	1.52038	14.2292	9.35894	1.28001	1.80589
TFRC	3	196027183	196082097	54914	-	3586.01	783.522	572.21	597.668	1.11707e-09	3.59935e-07	0.552405	-0.856201	-1.81027	425.346	769.989	-1.93983	-1.68935
TGFA	2	70447284	70554194	106910	-	88.3713	23.3314	12.7277	14.7286	3.21152e-09	5.79487e-07	3.01347	1.59142	3.01347	22.1175	7.33957	2.61434	3.47353
TGFB1I1	16	31471585	31477961	6376	+	18.1734	4.97145	2.70777	3.0289	7.38659e-05	0.000568293	2.46397	1.30098	2.46397	4.309	1.74881	1.78746	3.39651
TGFB2	1	218345336	218444620	99284	+	110.565	28.6269	16.4916	18.4275	2.33324e-08	1.86838e-06	2.58494	1.37013	2.58494	26.5745	10.2805	2.22933	2.99728
TGIF1	18	3411608	3459979	48371	+	55.3404	12.9986	8.6666	9.2234	1.89348e-06	3.62953e-05	0.495583	-1.0128	-2.01783	6.11261	12.3342	-2.38845	-1.70472
THG1L	5	157731420	157741450	10030	+	103.542	22.4429	16.8296	17.257	3.88895e-05	0.000352513	0.649251	-0.623152	-1.54024	13.5869	20.9271	-1.77789	-1.33435
THSD7A	7	11370365	11832199	461834	-	26.6308	7.36788	3.83239	4.43847	8.8414e-07	2.12146e-05	2.97324	1.57204	2.97324	6.64276	2.23418	2.33069	3.79294
TIMM17B	X	48893447	48898144	4697	-	28.2136	6.52316	4.53006	4.70226	0.00101236	0.00430341	0.610411	-0.712148	-1.63824	3.56469	5.83983	-2.09587	-1.28053
TIMM8A	X	101345661	101348743	3082	-	128.215	27.9037	20.8533	21.3691	1.57587e-05	0.000179514	0.649413	-0.622792	-1.53985	16.827	25.9111	-1.7521	-1.35331
TIMP2	17	78852977	78925388	72411	-	6177.69	1562.62	899.838	1029.62	4.53553e-12	2.04598e-08	2.88721	1.52968	2.88721	1529.48	529.745	2.68166	3.10851
TIMP3	22	32801701	32863044	61343	+	1370.1	308.96	218.023	228.35	8.61808e-09	9.57422e-07	1.83703	0.877375	1.83703	295.721	160.978	1.68571	2.00194
TLCD4	1	95117355	95197608	80253	+	38.9174	8.71721	6.2541	6.48624	0.0014412	0.00565161	0.62949	-0.667745	-1.58859	5.01141	7.96107	-2.0376	-1.23852
TLE5	19	3052910	3063108	10198	-	290.186	67.7715	47.1223	48.3643	0.000248535	0.00143859	1.50162	0.586521	1.50162	58.0623	38.6664	1.27288	1.77147
TM7SF2	11	65111845	65116409	4564	+	7.99323	2.43974	1.11696	1.3322	2.20385e-05	0.000230841	3.30143	1.72309	3.30143	2.04499	0.619425	2.27825	4.78413
TM9SF1	14	24189149	24195688	6539	-	92.7812	20.761	14.9274	15.4635	0.000469598	0.00233556	1.58948	0.668559	1.58948	18.9837	11.9433	1.28566	1.96512
TMA16	4	163494442	163520540	26098	+	323.647	75.039	51.7389	53.9412	3.41685e-05	0.000320001	0.587152	-0.768193	-1.70314	39.9101	67.9724	-2.02991	-1.42896
TMA16P2	1	45846994	45847595	601	-	14.0005	3.42828	2.24328	2.33342	0.00575992	0.017012	0.611243	-0.710182	-1.63601	1.77042	2.89642	-2.23158	-1.19939
TMCC1	3	129647792	129893607	245815	-	220.915	44.5136	36.0407	36.8192	1.6978e-06	3.34444e-05	1.51043	0.594957	1.51043	44.3054	29.333	1.36913	1.66631
TMCC2	1	205227946	205285633	57687	+	43.2336	10.1932	6.87146	7.2056	0.00011725	0.000811636	1.78544	0.836278	1.78544	9.23743	5.17376	1.43512	2.22127
TMEFF2	2	191949043	192194934	245891	-	7.61977	1.75433	1.19303	1.26996	0.00154777	0.00598799	1.95658	0.968331	1.95658	1.68085	0.859076	1.36476	2.80504
TMEM100	17	55719627	55732122	12495	-	12.3048	3.07	1.95544	2.05079	0.00283221	0.00964477	1.74252	0.801178	1.74252	2.60603	1.49555	1.26371	2.40275
TMEM108	3	133038391	133397793	359402	+	209.932	45.3406	33.845	34.9887	2.23193e-06	4.10389e-05	1.65603	0.727726	1.65603	43.6308	26.3467	1.46281	1.87476
TMEM119	12	108589851	108598321	8470	-	18.7721	4.23495	2.94469	3.12868	4.24287e-05	0.000375531	2.00375	1.0027	2.00375	4.17418	2.08318	1.58547	2.53239
TMEM121B	22	17116297	17121368	5071	-	153.967	34.2491	24.3718	25.6612	1.13603e-07	5.41333e-06	1.90156	0.927183	1.90156	33.6346	17.6879	1.6919	2.13719
TMEM123	11	102396332	102470385	74053	-	871.58	205.537	137.491	145.263	2.15028e-06	4.00822e-05	0.52993	-0.916128	-1.88704	100.631	189.895	-2.20532	-1.6147
TMEM130	7	98846488	98870772	24284	-	40.6355	10.8634	6.01077	6.77259	3.49029e-05	0.000325528	2.50702	1.32597	2.50702	9.68286	3.86231	1.84724	3.40244
TMEM14A	6	52671113	52686589	15476	+	187.341	40.8737	30.4888	31.2235	5.42846e-05	0.000450512	1.50593	0.590653	1.50593	37.5273	24.9197	1.30672	1.7355
TMEM150C	4	82483170	82562358	79188	-	50.7698	11.0476	8.23354	8.46163	0.000925851	0.00401074	1.51675	0.600986	1.51675	10.199	6.72424	1.23281	1.8661
TMEM151B	6	44270450	44307507	37057	+	142.16	39.2147	21.0786	23.6933	1.35736e-07	6.12304e-06	2.61664	1.38772	2.61664	34.2842	13.1024	2.19093	3.12507
TMEM158	3	45224466	45226288	1822	-	12.1228	2.90453	1.91194	2.02047	0.000648329	0.00302546	0.529392	-0.917591	-1.88896	1.39875	2.64219	-2.54967	-1.39946
TMEM169	2	216081866	216102784	20918	+	372.368	84.4673	58.6344	62.0614	5.70586e-09	7.57033e-07	1.96957	0.977883	1.96957	82.3245	41.7982	1.79604	2.15988
TMEM229A	7	124030921	124033068	2147	-	8.91053	1.95226	1.44923	1.48509	0.0181982	0.0431885	0.66665	-0.584998	-1.50004	1.18805	1.78212	-2.06892	-1.08758
TMEM245	9	109015135	109119948	104813	-	814.723	178.451	129.964	135.787	1.34071e-08	1.27484e-06	0.553254	-0.853986	-1.80749	96.7322	174.842	-1.97263	-1.65617
TMEM255A	X	120258650	120311557	52907	-	54.8307	12.6744	8.58487	9.13845	1.54816e-06	3.11774e-05	2.0228	1.01636	2.0228	12.2306	6.04634	1.71232	2.38958
TMEM33	4	41935129	41960804	25675	+	1820.92	395.734	295.841	303.486	1.62601e-05	0.000183833	0.65499	-0.610455	-1.52674	240.22	366.753	-1.73468	-1.34373
TMEM35A	X	101078879	101096368	17489	+	181.86	38.5493	29.3346	30.3101	3.43004e-07	1.11316e-05	1.66874	0.738757	1.66874	37.9052	22.7149	1.5043	1.85115
TMEM38B	9	105694541	105776630	82089	+	163.964	36.1861	26.5653	27.3274	1.78746e-05	0.000196504	0.633605	-0.658344	-1.57827	21.1982	33.4565	-1.81299	-1.37394
TMEM39A	3	119428949	119468831	39882	-	126.247	27.0922	20.3789	21.0412	2.16411e-06	4.01011e-05	0.605428	-0.723974	-1.65173	15.8698	26.2126	-1.86715	-1.46116
TMEM44	3	194587673	194633690	46017	-	11.1973	2.53181	1.8092	1.86621	0.0137452	0.0343663	1.52871	0.612312	1.52871	2.2564	1.47602	1.10413	2.11654
TMEM59L	19	18607430	18621040	13610	+	7.63843	1.9334	1.13716	1.27307	0.00530367	0.0159075	2.12534	1.08769	2.12534	1.73147	0.814677	1.26183	3.57977
TMEM8B	9	35814451	35865519	51068	+	73.7727	16.3872	11.9629	12.2955	0.000366776	0.00194042	1.5317	0.615132	1.5317	14.8777	9.71321	1.27209	1.84428
TMOD1	9	97501180	97601744	100564	+	13.3405	3.75953	1.77976	2.22341	4.45835e-05	0.000390264	3.57538	1.8381	3.57538	3.47492	0.9719	2.28365	5.59778
TMSB15B	X	103918896	104076213	157317	+	171.992	36.4442	28.0257	28.6653	5.2215e-06	7.84268e-05	1.52135	0.605349	1.52135	34.5925	22.7381	1.3601	1.70171
TMSB4X	X	12975110	12977228	2118	+	4502.28	1029.93	706.986	750.379	3.16329e-10	1.71235e-07	2.0051	1.00367	2.0051	1001.35	499.405	1.86586	2.15472
TMSB4XP2	2	3617548	3617758	210	-	8.95813	2.64919	1.36792	1.49302	0.00139747	0.00550566	2.14454	1.10067	2.14454	2.03645	0.949596	1.45451	3.16193
TMSB4XP4	9	128342153	128342771	618	+	18.0811	4.79086	2.82076	3.01351	0.00137241	0.00542588	1.89863	0.924957	1.89863	3.94775	2.07927	1.36745	2.63614
TMSB4XP6	20	50840615	50840750	135	-	53.6392	13.2274	8.52184	8.93987	3.07095e-05	0.000293705	1.81333	0.858645	1.81333	11.5244	6.35535	1.49674	2.1969
TMTC1	12	29500840	29784760	283920	-	11.4128	2.99212	1.69838	1.90214	4.45235e-05	0.000389991	2.55722	1.35458	2.55722	2.73482	1.06945	1.85702	3.52143
TMX4	20	7977346	8019806	42460	-	947.642	195.421	154.102	157.94	6.37685e-08	3.80167e-06	1.55837	0.640035	1.55837	192.411	123.47	1.44412	1.68166
TNC	9	115019575	115118258	98683	-	145.683	44.5121	16.6793	24.2806	8.95422e-12	3.02944e-08	6.29506	2.65422	6.29506	41.9044	6.65671	5.4927	7.21463
TNFRSF19	13	23570370	23676105	105735	+	53.3011	14.9142	6.99696	8.88351	2.74895e-08	2.03287e-06	4.11675	2.04151	4.11675	14.2947	3.47233	3.28536	5.15853
TNFRSF1A	12	6328757	6342115	13358	-	33.183	7.59522	5.29699	5.53051	7.52575e-05	0.000574427	1.76984	0.823622	1.76984	7.06764	3.99337	1.44222	2.17189
TNK2	3	195863364	195911946	48582	-	8.381	2.48578	1.28304	1.39683	0.0079327	0.0220937	1.96461	0.974241	1.96461	1.85133	0.94234	1.25002	3.08771
TNR	1	175315194	175743617	428423	-	9.85494	2.58759	1.44346	1.64249	0.000437796	0.00221732	2.53457	1.34174	2.53457	2.35559	0.929387	1.65036	3.8925
TOLLIP	11	1274371	1309655	35284	-	52.1859	11.738	8.36877	8.69766	2.04607e-05	0.00021847	1.72547	0.786986	1.72547	11.0128	6.38251	1.45677	2.04372
TOM1L2	17	17843511	17972423	128912	-	43.735	10.7714	6.81305	7.28917	3.97269e-05	0.000357701	2.01422	1.01022	2.01422	9.74182	4.83653	1.59906	2.53716
TOX2	20	43914852	44069617	154765	+	35.8557	8.65393	5.72429	5.97595	0.000296532	0.00164804	1.72163	0.783779	1.72163	7.56046	4.39144	1.36773	2.16711
TP53I11	11	44885903	44951307	65404	-	744.437	170.912	120.72	124.073	0.000162766	0.00104665	1.51997	0.604044	1.51997	149.674	98.4716	1.29376	1.78574
TP53I3	2	24077433	24085862	8429	-	77.4347	18.6426	12.1672	12.9058	1.65815e-05	0.000186221	1.926	0.945608	1.926	16.9901	8.82145	1.58021	2.34746
TP53INP1	8	94925972	94949379	23407	-	567.079	143.277	86.2672	94.5132	7.59869e-10	3.21354e-07	2.3702	1.24501	2.3702	132.939	56.0877	2.15151	2.61112
TP53INP2	20	34704339	34713440	9101	+	238.756	63.3848	34.5432	39.7927	2.64322e-09	5.14204e-07	2.93935	1.5555	2.93935	59.3827	20.2026	2.56386	3.36985
TPBGL	11	75240774	75243705	2931	+	47.8423	11.5999	7.69148	7.97371	0.00117722	0.00480953	1.60376	0.681459	1.60376	9.82266	6.12477	1.27041	2.02459
TPM1	15	63042632	63071916	29284	+	606.862	130.393	97.0328	101.144	4.71666e-09	6.719e-07	1.78548	0.836315	1.78548	129.665	72.622	1.65246	1.92921
TPPP	5	659862	693353	33491	-	34.1693	8.19362	5.41939	5.69489	0.000128267	0.000869657	1.8146	0.859653	1.8146	7.3431	4.04667	1.44555	2.27787
TPTE2P1	13	24924677	24968488	43811	-	11.7633	3.36036	1.78439	1.96055	0.000141095	0.000935085	2.31891	1.21345	2.31891	2.73966	1.18144	1.68128	3.19837
TRAK1	3	42013802	42225891	212089	+	332.816	70.2895	54.2781	55.4693	2.43862e-06	4.39438e-05	1.50638	0.591087	1.50638	66.6762	44.2625	1.36135	1.66686
TRANK1	3	36826820	36945099	118279	-	26.1671	5.52327	4.25998	4.36118	0.00157805	0.00608427	0.665351	-0.587812	-1.50297	3.48481	5.23755	-1.86757	-1.20954
TRAPPC9	8	139727725	140458580	730855	-	66.2249	15.1443	10.7033	11.0375	0.0001102	0.000772314	1.5995	0.677623	1.5995	13.583	8.492	1.34215	1.9062
TRHDE	12	72087266	72670759	583493	+	16.4957	3.7402	2.59181	2.74929	0.000557978	0.00268819	0.530089	-0.915694	-1.88648	1.90494	3.59363	-2.54319	-1.39934
TRIL	7	28953358	28958331	4973	-	34.5668	9.69223	5.02116	5.76114	2.66465e-07	9.6419e-06	2.88688	1.52951	2.88688	8.55788	2.9644	2.34278	3.55735
TRIM2	4	153152342	153339318	186976	+	598.338	141.128	94.7803	99.723	8.74492e-08	4.5167e-06	1.87927	0.910169	1.87927	130.176	69.2697	1.68072	2.10127
TRIM36	5	115124762	115180547	55785	-	194.198	45.6103	30.6834	32.3664	6.42107e-08	3.80261e-06	1.92312	0.943447	1.92312	42.5877	22.1451	1.71913	2.15131
TRIM46	1	155173787	155184972	11185	+	11.1979	2.6699	1.75913	1.86632	0.00722428	0.0204487	1.75926	0.814968	1.75926	2.37987	1.35277	1.1966	2.58648
TRIM69	15	44728988	44767830	38842	+	257.628	55.224	41.4692	42.938	1.90539e-07	7.81381e-06	1.69289	0.759485	1.69289	53.9861	31.89	1.5309	1.87201
TRIOBP	22	37697048	37776557	79509	+	62.0393	16.2622	9.63875	10.3399	0.000519748	0.00253377	1.93413	0.951681	1.93413	13.6318	7.04802	1.4491	2.58149
TSC2	16	2047967	2089492	41525	+	69.6535	16.2258	11.2312	11.6089	0.00229071	0.00815147	1.5375	0.620585	1.5375	14.0679	9.14989	1.21565	1.94456
TSC22D3	X	107713221	107777343	64122	-	149.102	34.5233	23.3937	24.8504	2.61771e-07	9.54863e-06	1.99321	0.995097	1.99321	33.0963	16.6045	1.73937	2.28411
TSHZ2	20	52972358	53495331	522973	+	22.7616	5.79884	3.51561	3.7936	8.27633e-05	0.000616245	2.09907	1.06975	2.09907	5.13898	2.44822	1.59901	2.75551
TSN	2	121737103	121767854	30751	+	1388	312.758	220.343	231.333	3.72297e-09	6.27346e-07	0.534983	-0.902434	-1.86922	161.252	301.414	-2.02825	-1.72265
TSPAN12	7	120787320	120858403	71083	-	27.6786	6.85645	4.32716	4.6131	0.00223671	0.00799719	0.555063	-0.849277	-1.8016	3.29319	5.93301	-2.53664	-1.27955
TSPAN17	5	176647387	176659055	11668	+	79.1063	17.5379	12.7454	13.1844	4.7903e-05	0.000411601	1.64416	0.717347	1.64416	16.3963	9.97247	1.38954	1.94542
TSPAN18	11	44726465	44932424	205959	+	719.749	159.866	116.048	119.958	4.94296e-06	7.55854e-05	1.63541	0.709652	1.63541	148.881	91.0357	1.43528	1.86345
TSPAN7	X	38561370	38688921	127551	+	228.509	52.4296	36.3978	38.0848	7.5639e-08	4.18277e-06	1.82601	0.868692	1.82601	49.2166	26.9531	1.64422	2.02789
TSPY26P	20	32186477	32190528	4051	-	61.943	14.1345	9.81163	10.3238	1.34741e-05	0.000158837	1.85516	0.891545	1.85516	13.416	7.2317	1.54259	2.23107
TTBK1	6	43243481	43288259	44778	+	53.9807	14.6782	7.74722	8.99679	1.0617e-07	5.13144e-06	3.01719	1.59321	3.01719	13.5144	4.47915	2.47548	3.67743
TTC9	14	70641916	70675367	33451	+	58.9845	14.4078	9.06202	9.83074	2.11445e-07	8.34251e-06	2.25451	1.17282	2.25451	13.6202	6.0413	1.92767	2.63678
TTF2	1	117060326	117107454	47128	+	784.88	163.101	128.06	130.813	1.79857e-07	7.44344e-06	0.662446	-0.594126	-1.50956	104.252	157.375	-1.63227	-1.39607
TTL	2	112482156	112541740	59584	+	1441.95	308.868	231.372	240.325	6.65829e-09	8.26666e-07	1.73718	0.796749	1.73718	305.05	175.6	1.60959	1.87488
TTLL12	22	43166622	43187135	20513	-	76.3709	16.5696	12.306	12.7285	0.0010769	0.00450275	0.642708	-0.637766	-1.55592	9.96001	15.497	-1.95586	-1.23776
TTYH3	7	2631986	2664803	32817	+	216.704	52.291	34.7805	36.1173	1.67401e-05	0.000187691	1.68284	0.7509	1.68284	45.31	26.9247	1.44098	1.9653
TUB	11	8019244	8106244	87000	+	482.013	109.082	77.2996	80.3355	5.89866e-08	3.59579e-06	0.575042	-0.798261	-1.739	58.6604	102.011	-1.91032	-1.58305
TUBA1A	12	49184795	49189081	4286	-	9646.5	2516.85	1410.46	1607.75	1.36225e-10	9.99401e-08	2.82787	1.49971	2.82787	2375.48	840.023	2.56075	3.12285
TUBA1C	12	49188736	49274601	85865	+	74.401	18.5258	11.7882	12.4002	3.57989e-05	0.000332282	1.8244	0.867419	1.8244	16.0196	8.78075	1.49696	2.22346
TUBA3FP	22	21008193	21014293	6100	-	7.96573	1.99093	1.25517	1.32762	0.00252179	0.00881616	1.88325	0.913226	1.88325	1.73432	0.92092	1.322	2.68279
TUBB2A	6	3153666	3157545	3879	-	178.781	44.2681	27.9289	29.7969	2.52327e-07	9.35547e-06	2.03851	1.02751	2.03851	39.9809	19.6129	1.77324	2.34345
TUBB2B	6	3224277	3231731	7454	-	1163.51	257.499	187.619	193.918	8.5797e-08	4.46574e-06	1.66461	0.735181	1.66461	242.285	145.551	1.5214	1.82129
TUBB3	16	89921392	89938762	17370	+	80.8732	20.2778	12.7007	13.4789	0.000257201	0.00147737	1.85564	0.89192	1.85564	17.5176	9.44016	1.44473	2.38344
TUFT1	1	151540305	151583584	43279	+	48.3858	10.9555	7.81449	8.0643	7.40381e-05	0.000569274	1.62906	0.704041	1.62906	9.99387	6.13474	1.36845	1.93931
TVP23C-CDRT4	17	15436021	15563562	127541	-	15.4224	4.45505	2.17299	2.5704	0.00642812	0.0185959	2.31671	1.21208	2.31671	3.59083	1.54997	1.22759	4.3721
TWNK	10	100987367	100994404	7037	+	279.496	65.2107	44.1239	46.5826	1.70184e-07	7.21976e-06	0.521261	-0.939921	-1.91842	31.9231	61.2421	-2.17041	-1.69569
TXN	9	110243810	110256508	12698	-	788.988	171.707	127.841	131.498	1.1713e-07	5.54238e-06	0.623557	-0.681407	-1.6037	101.008	161.988	-1.74735	-1.47187
TXNIP	1	145992435	145996580	4145	-	693.697	149.724	110.692	115.616	2.65814e-09	5.14204e-07	1.81146	0.857152	1.81146	148.986	82.2463	1.68033	1.95282
TXNP6	4	76958860	76959170	310	-	56.3324	11.7738	9.1288	9.38873	0.000157799	0.00101906	0.637799	-0.648826	-1.56789	7.3124	11.4651	-1.87271	-1.31269
TXNRD2	22	19875517	19941821	66304	-	10.5165	2.30165	1.64757	1.75274	0.0123029	0.031467	1.70267	0.767796	1.70267	2.20844	1.29705	1.10713	2.61855
TYSND1	10	70137981	70146701	8720	-	23.1241	5.19473	3.70449	3.85401	0.000232179	0.00137083	0.578749	-0.78899	-1.72786	2.82566	4.88236	-2.16472	-1.37917
U2AF1L4	19	35742464	35745446	2982	-	11.5816	2.49988	1.8752	1.93027	0.00555072	0.0164913	1.57191	0.652518	1.57191	2.35949	1.50104	1.1751	2.1027
UACA	15	70654554	70763559	109005	-	34.6341	7.80872	5.44903	5.77234	1.10177e-05	0.000135806	0.510382	-0.97035	-1.95932	3.90113	7.64355	-2.383	-1.61096
UBE2H	7	129830732	129952961	122229	-	634.385	137.578	101.579	105.731	6.3463e-09	8.10231e-07	1.76655	0.820931	1.76655	135.026	76.4352	1.63372	1.91017
UBE2L6	11	57551656	57568285	16629	-	89.879	20.0239	14.4523	14.9798	2.88717e-05	0.000281905	1.6711	0.7408	1.6711	18.7434	11.2162	1.41832	1.96894
UBE2QL1	5	6448859	6496724	47865	+	9.45493	2.20959	1.49072	1.57582	0.00222279	0.00796214	1.84973	0.887318	1.84973	2.0457	1.10594	1.3079	2.61603
UBL3	13	29764371	29850618	86247	-	185.197	42.6718	29.8922	30.8662	2.69307e-05	0.000267194	1.61143	0.688339	1.61143	38.093	23.6393	1.38359	1.87678
UFL1	6	96521595	96555277	33682	+	284.165	59.781	46.1512	47.3609	5.06605e-06	7.6602e-05	0.643279	-0.636483	-1.55453	37.0798	57.6419	-1.74906	-1.38164
UFL1-AS1	6	96199840	96521718	321878	-	14.2703	3.55242	2.11296	2.37839	2.49206e-05	0.000251064	2.60517	1.38138	2.60517	3.43735	1.31943	1.91543	3.54328
UGGT2	13	95801580	96053483	251903	-	36.0065	7.58991	5.8351	6.00109	0.00153875	0.0059599	0.657344	-0.605279	-1.52127	4.76037	7.24182	-1.90624	-1.21405
ULBP2	6	149942014	149949236	7222	+	9.05691	2.08402	1.45281	1.50949	0.00529026	0.0158813	1.67488	0.744054	1.67488	1.89033	1.12864	1.206	2.32605
UNC5C	4	95162504	95549207	386703	-	267.404	59.5728	42.293	44.5674	1.1448e-08	1.17967e-06	1.91813	0.939698	1.91813	58.5895	30.5452	1.74478	2.1087
UNC79	14	93333219	93707877	374658	+	267.442	56.6187	43.3074	44.5737	1.37745e-06	2.88948e-05	1.60378	0.681472	1.60378	54.9096	34.2377	1.43618	1.79092
UNG	12	109097597	109110993	13396	+	1117.25	232.249	182.016	186.209	1.68054e-07	7.15182e-06	0.654136	-0.612337	-1.52873	147.274	225.143	-1.65626	-1.41103
URB1	21	32311018	32393013	81995	-	242.053	50.9881	39.2844	40.3422	2.40406e-05	0.000245757	0.646711	-0.628807	-1.54629	31.6871	48.9973	-1.77665	-1.34579
URB2	1	229626247	229660201	33954	+	454.305	113.122	70.3608	75.7175	2.78725e-08	2.04999e-06	0.466253	-1.10081	-2.14476	48.1548	103.28	-2.42022	-1.90064
USE1	19	17215346	17219830	4484	+	8.76433	1.99342	1.40971	1.46072	0.0215977	0.0494221	1.55059	0.632813	1.55059	1.77604	1.1454	1.07704	2.23233
USP2-AS1	11	119364359	119526665	162306	+	11.3916	3.23782	1.40129	1.89859	2.08834e-05	0.000220967	0.2183	-2.19562	-4.58086	0.680395	3.11679	-7.52027	-2.79036
USP20	9	129834698	129881839	47141	+	23.6417	5.38573	3.77508	3.94029	0.00531483	0.0159271	1.61212	0.68896	1.61212	4.86365	3.01693	1.18586	2.1916
USP35	11	78188812	78215233	26421	+	18.8682	4.97145	3.00499	3.1447	0.00699732	0.0199525	1.63468	0.709005	1.63468	3.90224	2.38717	1.18328	2.25826
UTP20	12	101280105	101386619	106514	+	1250.73	290.598	196.568	208.456	3.40005e-09	6.05433e-07	0.503095	-0.991098	-1.9877	139.543	277.369	-2.1723	-1.81879
UTP25	1	209827972	209857566	29594	+	391.407	84.9903	62.7871	65.2346	2.41594e-08	1.91198e-06	0.574038	-0.800783	-1.74205	47.5809	82.8882	-1.89971	-1.59747
VASH1	14	76761468	76783016	21548	+	126.692	28.7682	20.5228	21.1153	2.69544e-05	0.000267233	1.5793	0.659286	1.5793	25.8577	16.3729	1.36553	1.82654
VAT1	17	43014607	43025124	10517	-	363.687	82.8558	58.5723	60.6146	2.7298e-05	0.000269653	1.63034	0.70517	1.63034	75.1403	46.0888	1.39651	1.90332
VCAN	5	83471618	83582304	110686	+	1045.13	257.76	156.541	174.188	9.26962e-11	9.03966e-08	0.391458	-1.35307	-2.55455	98.0082	250.367	-2.78531	-2.34291
VEGFB	11	64234538	64238794	4256	+	45.4508	10.5872	7.31722	7.57513	0.0021965	0.00790125	1.57505	0.655399	1.57505	9.26678	5.88348	1.23672	2.00593
VEGFD	X	15345596	15384414	38818	-	130.333	29.7789	20.5544	21.7222	2.14722e-07	8.39837e-06	0.515131	-0.956989	-1.94125	14.7707	28.6737	-2.20731	-1.70727
VGLL3	3	86876388	86991150	114762	-	88.0548	19.7783	14.0207	14.6758	4.95311e-06	7.56551e-05	0.553849	-0.852434	-1.80554	10.462	18.8896	-2.11436	-1.54184
VIP	6	152750797	152759766	8969	+	99.5041	30.6541	12.978	16.584	2.05798e-09	4.49205e-07	4.23902	2.08373	4.23902	26.8371	6.33096	3.54727	5.06568
VPS28	8	144423601	144428564	4963	-	27.8649	6.61429	4.48615	4.64414	0.00980627	0.026221	1.5203	0.604353	1.5203	5.60289	3.68539	1.13951	2.02834
VSNL1	2	17539126	17657019	117893	+	17.7519	3.98433	2.82235	2.95864	0.000258766	0.00148365	0.549762	-0.863122	-1.81897	2.0991	3.81819	-2.33693	-1.41581
VSTM2A	7	54542325	54571081	28756	+	342.666	75.0814	55.1499	57.111	8.21762e-07	2.01222e-05	1.67954	0.748064	1.67954	71.5944	42.6275	1.49712	1.88419
VSTM2A-OT1	7	54556970	54571727	14757	+	12.1215	3.15772	1.92987	2.02024	0.00956381	0.0257361	1.64986	0.72234	1.64986	2.51569	1.52479	1.1641	2.33832
VSTM4	10	49014236	49115523	101287	-	21.9076	4.97145	3.55662	3.65127	0.00317727	0.0105906	1.51822	0.602379	1.51822	4.40265	2.89988	1.1902	1.93663
WASHC3	12	102012840	102062150	49310	-	77.5199	17.4869	12.304	12.92	1.46697e-06	3.00341e-05	1.86291	0.897557	1.86291	16.8142	9.02578	1.60993	2.15564
WASHC4	12	105107324	105169131	61807	+	633.878	140.606	101.842	105.646	1.16008e-06	2.56746e-05	0.590873	-0.759079	-1.69241	78.4771	132.815	-1.90879	-1.50056
WBP1	2	74458400	74460892	2492	+	106.962	23.8259	17.3317	17.8269	0.000470413	0.0023379	1.52976	0.613307	1.52976	21.5601	14.0938	1.26997	1.8427
WBP1L	10	102743948	102834517	90569	+	96.003	21.2017	15.5309	16.0005	7.06556e-05	0.000550479	1.58512	0.664592	1.58512	19.6221	12.3789	1.3455	1.86742
WDR13	X	48590042	48608870	18828	+	26.7052	7.04285	4.21767	4.45087	0.000569193	0.00273055	1.81463	0.859677	1.81463	5.73908	3.16267	1.38546	2.37675
WDR3	1	117929720	117966544	36824	+	1401	302.296	227.145	233.5	4.66668e-08	3.02155e-06	0.625851	-0.67611	-1.59783	179.765	287.234	-1.72726	-1.47809
WDR35	2	19910260	19990132	79872	-	501.157	113.357	78.8686	83.5262	2.98167e-09	5.52752e-07	0.50582	-0.983304	-1.97699	56.1146	110.938	-2.15713	-1.81189
WDR4	21	42843094	42879569	36475	-	26.7064	5.95179	4.26569	4.45107	0.000374975	0.00196951	0.57955	-0.786996	-1.72548	3.26626	5.63587	-2.19702	-1.35514
WDR43	2	28894667	28948220	53553	+	1140.15	244.496	182.903	190.026	8.47034e-09	9.57422e-07	0.574764	-0.798959	-1.73985	138.713	241.339	-1.88153	-1.60883
WDR44	X	118346073	118449962	103889	+	132.222	28.4186	21.4677	22.037	3.50523e-06	5.82683e-05	1.5762	0.656448	1.5762	26.9659	17.1082	1.40295	1.77083
WDR46	6	33279108	33289248	10140	-	136.769	30.6131	21.9958	22.7948	0.000117463	0.000812693	0.614949	-0.701461	-1.62615	17.3598	28.2297	-1.95861	-1.35012
WDR47	1	108970214	109042114	71900	-	590.905	133.505	92.5168	98.4842	6.00868e-10	2.80398e-07	2.04221	1.03013	2.04221	132.223	64.7451	1.88808	2.20893
WDR5	9	134135365	134159969	24604	+	217.387	48.9693	34.8915	36.2312	2.9466e-07	1.02774e-05	0.579149	-0.787993	-1.72667	26.5754	45.887	-1.92513	-1.54867
WDR75	2	189441446	189475553	34107	+	581.983	123.493	94.6732	96.9972	5.57561e-07	1.5462e-05	0.647209	-0.627696	-1.54509	76.2229	117.772	-1.69484	-1.40858
WDR77	1	111439890	111449257	9367	-	525.385	114.169	84.9129	87.5642	1.16889e-07	5.54238e-06	0.61028	-0.712457	-1.63859	66.3719	108.756	-1.79246	-1.49793
WDSUB1	2	159235793	159286800	51007	-	29.8837	6.56306	4.86257	4.98062	0.000595568	0.00283398	0.652903	-0.61506	-1.53162	3.93472	6.02651	-1.86396	-1.25854
WFIKKN2	17	50834650	50842354	7704	+	163.266	45.2485	24.2493	27.211	1.64925e-07	7.13076e-06	2.59295	1.3746	2.59295	39.2752	15.1469	2.16932	3.09931
WRN	8	31033788	31176139	142351	+	298.438	61.5668	48.4787	49.7396	4.79433e-07	1.41047e-05	0.636598	-0.651546	-1.57085	38.6951	60.7842	-1.7268	-1.42898
WWC1	5	168291651	168472304	180653	+	72.9704	17.2781	11.4267	12.1617	5.9106e-07	1.6076e-05	0.493958	-1.01754	-2.02446	8.04224	16.2812	-2.35419	-1.74092
WWC2	4	183099257	183320778	221521	+	77.4237	18.2361	11.8877	12.9039	2.8885e-07	1.01959e-05	0.445499	-1.16651	-2.24468	7.95392	17.854	-2.63897	-1.9093
XPO5	6	43522334	43576039	53705	-	1922.15	421.007	312.836	320.358	9.28924e-07	2.19332e-05	0.65331	-0.61416	-1.53067	253.181	387.536	-1.68316	-1.39199
YAP1	11	102110447	102233425	122978	+	20.4707	5.35761	2.90587	3.41178	9.15134e-07	2.16892e-05	0.317718	-1.65418	-3.14745	1.64524	5.17831	-4.07285	-2.43231
YBX3	12	10699089	10723324	24235	-	11.6059	3.43784	1.47636	1.93431	4.63667e-07	1.37908e-05	0.21733	-2.20204	-4.60129	0.690666	3.17795	-6.31748	-3.35131
YPEL3	16	30092314	30096916	4602	-	9.73526	2.30165	1.5368	1.62254	0.00246266	0.00866994	1.82339	0.866623	1.82339	2.09573	1.14936	1.28921	2.57891
YPEL5	2	30146941	30160534	13593	+	301.11	64.8625	48.2124	50.185	3.48851e-08	2.42103e-06	1.76535	0.819954	1.76535	64.0744	36.2956	1.61015	1.93551
Z74021.1	22	32039490	32039897	407	+	276.214	59.3232	44.7981	46.0357	6.31673e-07	1.67757e-05	0.628892	-0.669116	-1.5901	35.5474	56.5239	-1.75697	-1.43908
Z99129.4	6	122436789	122439224	2435	-	120.562	25.1733	19.6345	20.0937	9.18701e-06	0.000117353	1.53088	0.614366	1.53088	24.3086	15.8788	1.35664	1.72751
ZBTB38	3	141324213	141449793	125580	+	86.9326	18.0687	14.1775	14.4888	2.66572e-05	0.000264869	1.5111	0.595595	1.5111	17.4377	11.5398	1.32467	1.72376
ZBTB4	17	7459366	7484264	24898	-	87.4558	20.2051	14.0187	14.576	6.31079e-06	8.8978e-05	1.73022	0.790951	1.73022	18.4744	10.6775	1.49102	2.00779
ZC2HC1A	8	78666089	78719766	53677	+	226.038	53.1094	36.6573	37.673	0.000233492	0.00137564	1.5176	0.601787	1.5176	45.4182	29.9278	1.28017	1.79906
ZCCHC12	X	118823824	118826969	3145	+	20.2068	5.84604	2.73292	3.3678	8.62356e-07	2.08026e-05	3.69596	1.88595	3.69596	5.30126	1.43434	2.76034	4.9487
ZDHHC11	5	795606	850987	55381	-	9.82002	2.60095	1.51783	1.63667	0.000983202	0.00420533	0.486694	-1.03891	-2.05468	1.07158	2.20176	-2.94202	-1.43497
ZDHHC22	14	77131270	77142735	11465	-	60.8146	14.8275	9.33377	10.1358	1.86705e-06	3.59875e-05	0.449448	-1.15377	-2.22495	6.28584	13.9857	-2.69726	-1.83535
ZDHHC24	11	66520637	66546236	25599	-	37.2209	8.36047	6.00473	6.20349	0.000275478	0.00156181	1.62484	0.700302	1.62484	7.68023	4.72675	1.32775	1.98842
ZER1	9	128729786	128772415	42629	-	51.8169	12.1063	8.32674	8.63615	0.00105773	0.00444268	1.5991	0.677256	1.5991	10.6268	6.6455	1.26332	2.02412
ZFAND2B	2	219195237	219209652	14415	+	12.5681	2.85417	1.96958	2.09469	0.00374963	0.0120246	1.79677	0.845407	1.79677	2.69144	1.49793	1.23909	2.60546
ZFAND3	6	37819727	38154625	334898	+	384.044	84.0528	61.8593	64.0073	4.14403e-07	1.27985e-05	1.67471	0.743908	1.67471	80.1534	47.8612	1.50569	1.8627
ZFP2	5	178895898	178933213	37315	+	10.193	2.25562	1.62996	1.69883	0.00176834	0.00666228	1.74951	0.806952	1.74951	2.16193	1.23573	1.29442	2.3646
ZFP36L1	14	68787660	68796254	8594	-	52.6268	12.1884	8.22442	8.77114	2.62368e-06	4.61121e-05	0.491448	-1.02489	-2.0348	5.78037	11.7619	-2.43023	-1.70372
ZFYVE1	14	72969451	73027132	57681	-	84.7705	20.0696	13.2609	14.1284	4.66912e-07	1.38568e-05	2.03403	1.02434	2.03403	18.9436	9.31329	1.75422	2.35848
ZHX1-C8orf76	8	123226189	123274285	48096	-	11.8111	3.02692	1.80497	1.96851	0.0212977	0.0489341	0.56429	-0.825492	-1.77214	1.42021	2.51681	-2.90009	-1.08289
ZHX2	8	122781655	122974511	192856	+	20.1832	4.43976	3.26366	3.36387	0.00101633	0.00431701	1.60288	0.680663	1.60288	4.143	2.58473	1.26699	2.0278
ZMAT4	8	40530590	40897834	367244	-	56.0333	13.119	8.6772	9.33888	5.50365e-07	1.54046e-05	2.15668	1.10881	2.15668	12.7608	5.91691	1.83163	2.53941
ZNF22-AS1	10	44997698	45000889	3191	-	46.2378	10.9633	7.39703	7.70629	2.50961e-05	0.000252127	1.75457	0.811121	1.75457	9.81732	5.59527	1.47023	2.0939
ZNF34	8	144773114	144787346	14232	-	23.2275	5.84415	3.63159	3.87124	3.01004e-05	0.00029138	2.02796	1.02003	2.02796	5.18549	2.557	1.61581	2.54524
ZNF358	19	7515292	7521026	5734	+	21.424	5.12978	3.33802	3.57066	0.011358	0.0295478	1.69807	0.763898	1.69807	4.4945	2.64682	1.12512	2.5628
ZNF385D	3	21412218	22373322	961104	-	12.7229	3.42828	2.02256	2.12048	0.00327212	0.0108374	0.574309	-0.800102	-1.74122	1.54711	2.69386	-2.3882	-1.26952
ZNF396	18	35366694	35377338	10644	-	8.89246	1.97943	1.41575	1.48208	0.0118927	0.0306443	1.65152	0.723795	1.65152	1.84625	1.11791	1.12886	2.41618
ZNF423	16	49487524	49857920	370396	-	81.8609	19.149	13.1878	13.6435	0.000179876	0.00113274	1.6169	0.69323	1.6169	16.8598	10.4272	1.33896	1.95253
ZNF425	7	149102784	149126325	23541	-	24.574	5.79884	3.87479	4.09566	0.000731096	0.00333129	1.81358	0.858842	1.81358	5.27997	2.91135	1.35939	2.41953
ZNF428	19	43607224	43619630	12406	-	62.0573	13.8133	10.0916	10.3429	0.00044874	0.00226344	1.50781	0.592458	1.50781	12.4372	8.24852	1.25848	1.80655
ZNF436	1	23359448	23369837	10389	-	220.733	50.4898	34.9659	36.7889	3.33778e-08	2.36493e-06	1.89625	0.923147	1.89625	48.1732	25.4045	1.7106	2.10204
ZNF485	10	43606419	43617905	11486	+	53.1322	11.1893	8.65574	8.85536	0.000187478	0.00116973	0.661438	-0.596322	-1.51186	7.05085	10.6599	-1.78382	-1.28136
ZNF517	8	144798876	144811170	12294	+	19.4904	4.32702	3.17005	3.2484	0.00163645	0.00625948	1.53888	0.621881	1.53888	3.93788	2.55892	1.22571	1.93206
ZNF528-AS1	19	52388842	52397784	8942	-	75.2035	16.0952	12.1789	12.5339	1.03034e-05	0.000128749	1.6119	0.688763	1.6119	15.4703	9.59754	1.40535	1.84881
ZNF536	19	30228290	30713539	485249	+	72.6335	17.7201	10.9731	12.1056	8.11799e-08	4.31516e-06	2.44135	1.28768	2.44135	17.1758	7.03537	2.08638	2.85671
ZNF555	19	2841437	2860472	19035	+	145.889	29.5589	23.7676	24.3148	3.65869e-06	6.04555e-05	1.53052	0.614017	1.53052	29.4123	19.2173	1.37143	1.70805
ZNF561-AS1	19	9621249	9647204	25955	+	47.0534	10.6658	7.50026	7.84223	1.48982e-05	0.000171007	1.80037	0.848291	1.80037	10.0836	5.60086	1.50938	2.14744
ZNF587B	19	57819721	57846239	26518	+	163.974	37.0692	26.4177	27.329	4.48135e-06	7.04369e-05	0.602231	-0.731612	-1.66049	20.5443	34.1137	-1.89742	-1.45315
ZNF600	19	52749942	52786808	36866	-	30.655	6.93141	4.90501	5.10916	0.000149188	0.000980552	1.73172	0.792207	1.73172	6.47771	3.74062	1.39792	2.14523
ZNF608	5	124636913	124748808	111895	-	317.389	66.705	51.5532	52.8982	3.09648e-07	1.05611e-05	1.57395	0.654392	1.57395	64.6937	41.1027	1.43733	1.72356
ZNF763	19	11965037	11980618	15581	+	21.3323	4.7589	3.44966	3.55538	0.00414713	0.0130542	1.5359	0.619088	1.5359	4.30673	2.80403	1.17693	2.00437
ZNF778	16	89217703	89237072	19369	+	206.035	45.2947	33.5626	34.3392	1.62466e-05	0.000183833	1.51037	0.594905	1.51037	41.3205	27.3578	1.33442	1.70952
ZNF784	19	55620741	55624567	3826	-	11.5259	2.94609	1.8453	1.92099	0.00965643	0.0258927	1.63032	0.705152	1.63032	2.38132	1.46065	1.1683	2.27504
ZNF792	19	34956354	34964230	7876	-	16.1684	3.94143	2.48326	2.69474	0.000377853	0.0019812	2.09097	1.06417	2.09097	3.64586	1.74362	1.50044	2.91393
ZNF793-AS1	19	37497159	37507123	9964	-	20.5908	4.75688	3.27824	3.4318	0.000406403	0.00209758	1.7736	0.826677	1.7736	4.38898	2.47462	1.37537	2.28712
ZNF821	16	71859680	71895337	35657	-	28.6538	6.83897	4.6172	4.77563	0.00162757	0.0062308	1.58921	0.668314	1.58921	5.86239	3.68886	1.24347	2.0311
ZNF836	19	52153864	52171644	17780	-	64.2661	13.9379	10.3682	10.711	8.35556e-06	0.000109676	1.66485	0.735396	1.66485	13.3833	8.03873	1.44297	1.92086
ZNF846	19	9751993	9793181	41188	-	8.93688	2.32446	1.36559	1.48948	0.00226049	0.00806731	2.07116	1.05044	2.07116	2.00898	0.969977	1.36444	3.14395
ZRANB2-AS2	1	71081324	71489977	408653	+	7.49623	1.92975	1.19101	1.24937	0.00947337	0.025569	1.73317	0.793417	1.73317	1.58452	0.914228	1.18815	2.5282
ZSWIM3	20	45857614	45879123	21509	+	38.5161	9.11424	6.20449	6.41934	0.00475303	0.0145461	1.52293	0.606852	1.52293	7.74989	5.0888	1.16518	1.99053
ZSWIM4	19	13795460	13832231	36771	+	46.0968	11.9559	7.23846	7.68279	0.000103635	0.000735443	1.90049	0.926368	1.90049	10.068	5.29759	1.49817	2.41084
ZSWIM5	1	45016399	45306210	289811	-	46.0048	10.219	7.35608	7.66747	1.49627e-05	0.000171601	1.76861	0.822618	1.76861	9.79608	5.53885	1.49057	2.09852
ZSWIM8	10	73785582	73801798	16216	+	65.3082	16.1626	10.2144	10.8847	7.4628e-06	0.000100792	1.99919	0.999418	1.99919	14.511	7.25842	1.65165	2.41986
ZYX	7	143381295	143391112	9817	+	52.3596	13.119	8.2168	8.7266	0.000376273	0.00197521	1.85791	0.893684	1.85791	11.3462	6.10697	1.42389	2.42424

## Sheet: siWDR5_RNA_IMR32_48h_q<0.05_1.5
Gene ID	Chromosome	Start	Stop	Length	Strand	Total counts	Maximum counts	Geometric mean	Arithmetic mean	P-value (siWDR5 vs. siCtrl)	FDR step up (siWDR5 vs. siCtrl)	Ratio (siWDR5 vs. siCtrl)	Log2(Ratio) (siWDR5 vs. siCtrl)	Fold change (siWDR5 vs. siCtrl)	LSMean(siWDR5) (siWDR5 vs. siCtrl)	LSMean(siCtrl) (siWDR5 vs. siCtrl)	FC 95% lower limit (siWDR5 vs. siCtrl)	FC 95% upper limit (siWDR5 vs. siCtrl)
ABCA2	9	137007234	137028923	21689	-	7.79813	1.91662	1.23512	1.29969	0.00689884	0.0296992	0.574563	-0.799464	-1.74045	0.948521	1.65086	-2.54105	-1.1921
ABCA5	17	69244311	69327245	82934	-	145.049	31.0451	23.5792	24.1748	4.49354e-05	0.000956082	0.659265	-0.60107	-1.51684	19.2104	29.1391	-1.75717	-1.30938
ABCB10	1	229516582	229558708	42126	-	202.162	49.2807	32.3206	33.6937	1.53041e-06	0.000100749	0.572481	-0.8047	-1.74678	24.5332	42.8541	-2.00444	-1.52225
ABCC9	12	21797401	21942530	145129	-	14.1218	3.70582	2.17346	2.35364	3.22423e-05	0.000773834	0.451935	-1.14581	-2.21271	1.4652	3.24207	-2.88885	-1.69482
ABHD14A	3	51971426	51981200	9774	+	12.8213	3.16013	2.05052	2.13689	0.0016838	0.0111178	1.71067	0.774566	1.71067	2.69713	1.57665	1.28205	2.2826
ABHD15	17	29560547	29567038	6491	-	9.41785	2.32176	1.44127	1.56964	0.000138083	0.00199431	0.443571	-1.17276	-2.25443	0.964618	2.17467	-3.11369	-1.6323
ABHD18	4	127965306	128039928	74622	+	46.1089	9.50996	7.50736	7.68481	6.24136e-05	0.00118568	0.650407	-0.620586	-1.5375	6.05699	9.31262	-1.79725	-1.31529
ABHD3	18	21650901	21704781	53880	-	49.7029	10.8563	7.98053	8.28382	2.40193e-05	0.000643969	0.58875	-0.764273	-1.69851	6.13954	10.4281	-2.02287	-1.42617
ABTB2	11	34150987	34358011	207024	-	7.33905	1.76693	1.16785	1.22317	0.00956253	0.0377561	1.68952	0.756615	1.68952	1.53676	0.909586	1.15641	2.46839
AC000089.1	22	19792294	19793095	801	+	41.3558	10.1349	6.64429	6.89264	0.000693359	0.00595821	0.61905	-0.691872	-1.61538	5.27085	8.51442	-2.02696	-1.28737
AC004453.1	7	44467897	44468305	408	+	260.79	59.2426	42.2061	43.465	5.72264e-06	0.000247077	0.629945	-0.666703	-1.58744	33.5969	53.333	-1.80854	-1.39337
AC005332.3	17	68131462	68131908	446	+	14.4984	3.42838	2.3336	2.4164	0.0015073	0.010353	0.604379	-0.726475	-1.65459	1.82054	3.01225	-2.1558	-1.26991
AC005944.1	19	3052910	3053725	815	+	53.5517	13.9201	8.34918	8.92529	0.00212633	0.013179	0.562878	-0.829105	-1.77658	6.42898	11.4216	-2.471	-1.27732
AC007182.2	14	75595805	75596207	402	-	32.6933	6.99838	5.30706	5.44888	0.000621868	0.00551307	0.652212	-0.616586	-1.53324	4.3019	6.59585	-1.8824	-1.24885
AC008026.1	17	62516321	62516768	447	-	20.05	4.85104	3.17054	3.34166	0.000437421	0.0043474	0.552887	-0.854944	-1.80869	2.37952	4.3038	-2.37841	-1.37544
AC008038.1	7	133034607	133035921	1314	-	3967.53	972.321	616.503	661.255	7.6084e-09	2.15269e-06	0.475863	-1.07138	-2.10144	426.418	896.093	-2.35485	-1.8753
AC008966.1	5	53109816	53127674	17858	+	13.8171	3.36139	2.23005	2.30285	0.00678862	0.0293769	1.55637	0.638185	1.55637	2.80405	1.80166	1.16085	2.08665
AC009245.1	7	137721985	137722847	862	+	80.8034	16.7698	13.1585	13.4672	2.07097e-05	0.000588847	0.655385	-0.609585	-1.52582	10.6637	16.2708	-1.74945	-1.33077
AC009549.1	11	19710934	19712620	1686	-	6.46873	1.42881	1.04476	1.07812	0.00818012	0.0335428	0.606772	-0.720774	-1.64807	0.814272	1.34197	-2.32317	-1.16914
AC010186.2	12	9648047	9658413	10366	+	33.4201	7.19225	5.41452	5.57002	0.000665867	0.005812	0.646369	-0.62957	-1.5471	4.37361	6.76643	-1.91059	-1.25277
AC015712.2	15	100892343	100919392	27049	-	30.7559	6.96557	4.97674	5.12598	0.000691819	0.00595457	0.63836	-0.647559	-1.56652	3.9945	6.25745	-1.94331	-1.26278
AC015813.6	17	58095672	58101480	5808	+	93.2732	20.3317	14.886	15.5455	1.97424e-06	0.000122679	0.562194	-0.830861	-1.77875	11.1889	19.9022	-2.06258	-1.53397
AC015849.5	17	35893707	35911652	17945	-	11.4906	3.22792	1.54374	1.9151	4.27622e-07	4.15075e-05	0.258155	-1.95369	-3.87364	0.785902	3.0443	-5.22425	-2.8722
AC015911.4	17	35459481	35460551	1070	-	30.4075	6.51748	4.93302	5.06792	0.00108355	0.00823377	1.52701	0.610711	1.52701	6.12484	4.01099	1.22816	1.89858
AC016705.2	15	80344853	80404215	59362	-	34.5118	8.47557	5.13521	5.75196	1.2169e-07	1.68566e-05	0.381602	-1.38986	-2.62053	3.17741	8.32651	-3.16841	-2.16739
AC021074.1	3	142827096	142827729	633	-	9.908	2.70928	1.54779	1.65133	0.00633614	0.0279834	0.550177	-0.862032	-1.8176	1.17216	2.13051	-2.67632	-1.2344
AC022415.3	19	12075327	12113326	37999	+	18.4903	4.24679	2.9977	3.08171	0.00292212	0.0163959	0.651312	-0.618579	-1.53536	2.43099	3.73244	-1.97309	-1.19474
AC024293.1	11	46428653	46429151	498	-	609.929	131.662	97.7741	101.655	3.83375e-06	0.000187431	0.591616	-0.757268	-1.69029	75.5717	127.738	-1.95439	-1.46187
AC026403.1	5	166382305	166382600	295	+	100.379	23.7716	16.2679	16.7298	0.000889519	0.00713439	1.50175	0.58664	1.50175	20.0851	13.3745	1.23629	1.8242
AC026412.1	5	1598920	1634006	35086	-	25.9344	5.77994	4.18719	4.32241	0.00103728	0.00795652	0.632615	-0.660599	-1.58074	3.34974	5.29507	-1.99736	-1.25102
AC026688.2	5	154483917	154486151	2234	-	10.8228	2.63429	1.72215	1.8038	0.00786811	0.0326255	0.598762	-0.739946	-1.67011	1.3511	2.2565	-2.36304	-1.18038
AC034193.1	3	10149986	10153327	3341	-	36.6559	7.58803	5.96429	6.10932	0.00058727	0.00531984	1.50444	0.589224	1.50444	7.33985	4.8788	1.23818	1.82795
AC044787.1	15	47730144	47730936	792	-	88.7245	20.1708	14.2363	14.7874	5.49866e-06	0.000239861	0.584936	-0.77365	-1.70959	10.9149	18.6599	-1.9866	-1.4712
AC048341.1	12	62602752	62622214	19462	+	9.28551	2.18781	1.49278	1.54758	0.00584387	0.0265319	0.609764	-0.713677	-1.63998	1.17242	1.92275	-2.26507	-1.18739
AC064799.1	15	71341158	71341713	555	-	181.224	41.3077	28.7234	30.2039	2.70092e-08	5.88801e-06	0.530125	-0.915596	-1.88635	20.9288	39.4791	-2.10282	-1.69217
AC068205.2	11	43578889	43840031	261142	+	7.37887	1.91993	1.13139	1.22981	0.00444448	0.0218818	0.506519	-0.981313	-1.97426	0.826969	1.63265	-3.07219	-1.26871
AC073225.1	2	155525424	155664669	139245	+	36.4621	8.76126	5.76681	6.07702	2.0632e-05	0.000588847	0.533986	-0.905127	-1.87271	4.23086	7.92318	-2.29259	-1.52973
AC073861.1	3	101576489	101576948	459	-	559.997	128.808	88.5163	93.3328	3.74102e-07	3.82677e-05	0.532504	-0.909135	-1.87792	64.8613	121.804	-2.15695	-1.63499
AC083843.3	8	134792020	134798273	6253	-	21.3499	4.86665	3.44131	3.55832	0.00237576	0.0142696	0.633605	-0.658344	-1.57827	2.76023	4.3564	-2.04481	-1.21818
AC090825.1	15	99805793	99916819	111026	+	12.0306	3.24527	1.86403	2.0051	0.00701976	0.0300737	0.554578	-0.850538	-1.80317	1.4306	2.57961	-2.71835	-1.19611
AC092198.1	X	40009276	40012183	2907	+	7.04053	2.11836	1.09947	1.17342	0.010965	0.0417323	0.5453	-0.874877	-1.83385	0.828146	1.5187	-2.77611	-1.21141
AC092614.1	2	191229165	191246173	17008	-	8.99969	2.0084	1.43664	1.49995	0.00122071	0.00893848	1.79466	0.843707	1.79466	1.92646	1.07344	1.32594	2.42905
AC092683.1	2	97416165	97433528	17363	-	29.7292	7.56173	4.62398	4.95486	0.000154614	0.00212752	0.510291	-0.970607	-1.95967	3.34826	6.56147	-2.58119	-1.4878
AC092747.4	12	27037100	27038961	1861	+	43.1585	9.91179	6.94848	7.19308	6.5749e-05	0.00122799	0.602764	-0.730335	-1.65902	5.41031	8.97584	-1.99379	-1.38047
AC100810.1	8	1761054	1764509	3455	-	19.6736	4.4283	3.16523	3.27893	0.00117247	0.00871031	0.612863	-0.706364	-1.63169	2.49189	4.06598	-2.09966	-1.26801
AC106820.4	16	2476558	2482174	5616	+	138.213	31.4714	22.4114	23.0355	9.6873e-06	0.000351972	0.636888	-0.650887	-1.57013	17.9255	28.1454	-1.79502	-1.37342
AC107027.3	3	131455126	131458599	3473	-	48.3401	10.4922	7.78038	8.05669	2.30494e-05	0.000628097	0.596655	-0.745031	-1.67601	6.02142	10.092	-1.98532	-1.41489
AC107081.2	2	61868432	61886083	17651	+	33.0205	8.07858	5.33326	5.50342	0.00198525	0.0125118	0.648919	-0.623891	-1.54103	4.33165	6.67518	-1.95224	-1.21643
AC107081.5	2	61878940	61881354	2414	+	10.1321	2.32262	1.63859	1.68869	0.0124386	0.0455046	0.651054	-0.619151	-1.53597	1.33179	2.04559	-2.1148	-1.11557
AC112777.1	12	20551590	20553013	1423	+	29.0919	6.05679	4.71587	4.84866	0.0013895	0.00973906	0.655759	-0.608762	-1.52495	3.84059	5.85672	-1.91476	-1.2145
AC113935.1	1	77129114	77129669	555	+	1107.91	245.108	176.754	184.651	3.99025e-09	1.71169e-06	0.554095	-0.851795	-1.80474	131.671	237.632	-1.96599	-1.65673
AC115223.1	4	65573459	65574329	870	+	952.501	211.489	152.944	158.75	2.91928e-08	6.06571e-06	0.582429	-0.779846	-1.71695	116.859	200.641	-1.88524	-1.56368
AC116533.1	11	16974693	16975014	321	-	1355.72	288.223	221.063	225.953	7.19896e-07	5.8846e-05	0.665601	-0.587271	-1.5024	180.589	271.317	-1.6512	-1.36702
AC131235.2	3	184149704	184150436	732	+	49.4361	10.3288	8.01476	8.23934	0.000395883	0.00405895	0.652154	-0.616716	-1.53338	6.50462	9.97406	-1.865	-1.26073
AC134878.2	Y	11153858	11215027	61169	-	9.64633	2.23225	1.53923	1.60772	0.00385174	0.0198529	0.585507	-0.772241	-1.70792	1.18742	2.02802	-2.38014	-1.22556
AC138649.1	15	22757841	22778742	20901	+	20.0578	4.78652	3.18468	3.34297	0.000138214	0.00199431	0.546093	-0.872782	-1.83119	2.36153	4.32441	-2.32288	-1.44358
AC138904.1	16	28284885	28292065	7180	-	20.007	5.10631	2.97015	3.3345	3.83938e-05	0.000855211	0.406035	-1.30033	-2.46284	1.92588	4.74313	-3.38946	-1.78955
AC144530.1	3	197850400	197850955	555	-	8.76082	2.20866	1.34589	1.46014	0.001543	0.0104902	0.493677	-1.01836	-2.02562	0.965183	1.95509	-3.00565	-1.36514
AC159540.2	2	97281356	97291850	10494	+	37.0807	7.94977	6.00702	6.18012	0.00166817	0.01105	0.664626	-0.589386	-1.50461	4.93501	7.42524	-1.88841	-1.19881
AC243919.1	15	82372196	82372913	717	-	9214.85	2101.31	1476.36	1535.81	1.57193e-08	3.80064e-06	0.572606	-0.804386	-1.7464	1118.42	1953.2	-1.9128	-1.59448
ACAD11	3	132558138	132660083	101945	-	67.8904	17.4741	9.78309	11.3151	1.10131e-09	7.58184e-07	0.331737	-1.59189	-3.01444	5.63719	16.993	-3.47679	-2.61357
ACADSB	10	123008979	123058291	49312	+	206.89	43.5759	33.6099	34.4817	6.01821e-07	5.16324e-05	0.638025	-0.648316	-1.56734	26.8618	42.1015	-1.73642	-1.41472
ACE	17	63477061	63498381	21320	+	11.2332	2.857	1.66613	1.87221	3.28121e-05	0.000780564	0.388106	-1.36548	-2.57662	1.04691	2.6975	-3.56289	-1.86336
ACP6	1	147629652	147670525	40873	-	20.5055	4.64341	3.29367	3.41759	0.0016121	0.0108405	0.613458	-0.704964	-1.6301	2.59883	4.23636	-2.11688	-1.25526
ACSF2	17	50426158	50474846	48688	+	32.0805	7.3943	5.17012	5.34674	0.00129156	0.00925259	1.57814	0.658225	1.57814	6.54573	4.14775	1.24605	1.99873
ACSL6	5	131949973	132012244	62271	-	12.3805	3.08076	1.84653	2.06341	2.87783e-05	0.000720704	0.397751	-1.33006	-2.51414	1.17435	2.95248	-3.43762	-1.83874
ADAM12	10	126012381	126388456	376075	-	10.6119	2.4557	1.67911	1.76865	0.00344447	0.018388	0.570743	-0.809086	-1.7521	1.28531	2.252	-2.47829	-1.2387
ADAM15	1	155050566	155062776	12210	+	6.57587	1.6074	1.0013	1.09598	0.0107221	0.0410716	0.525363	-0.928613	-1.90344	0.75495	1.43701	-3.1691	-1.14326
ADCY5	3	123282296	123449759	167463	-	12.8971	2.8653	2.09639	2.14951	0.00738543	0.0311672	0.663226	-0.592428	-1.50778	1.71427	2.58475	-1.99115	-1.14176
ADCYAP1	18	904871	912173	7302	+	31.9191	6.99951	5.14009	5.31986	0.000519964	0.00488656	0.621063	-0.687187	-1.61014	4.0763	6.56342	-2.01569	-1.28619
ADGRG1	16	57610652	57665581	54929	+	32.0769	7.62764	5.12108	5.34614	0.00021302	0.0026724	1.72806	0.789155	1.72806	6.77292	3.91937	1.37929	2.16503
ADGRG6	6	142301854	142446267	144413	+	13.0536	4.47591	1.45057	2.1756	1.73027e-07	2.15092e-05	0.153696	-2.70185	-6.50636	0.579667	3.77152	-9.55006	-4.43272
ADM2	22	50481543	50486441	4898	+	10.6148	2.37053	1.71036	1.76913	0.0135959	0.0485496	0.648473	-0.624882	-1.54208	1.39188	2.14639	-2.15215	-1.10495
ADPRM	17	10697594	10711559	13965	+	75.4146	15.9016	12.2591	12.5691	2.30031e-05	0.000628097	1.54753	0.629964	1.54753	15.2705	9.86769	1.34164	1.78501
AFF3	2	99545419	100192429	647010	-	394.203	80.9722	63.9824	65.7005	3.31806e-08	6.5856e-06	1.58775	0.666987	1.58775	80.623	50.778	1.46456	1.72131
AGL	1	99850361	99924024	73663	+	427.902	92.4198	68.9962	71.317	6.41681e-08	1.07869e-05	0.600141	-0.736627	-1.66628	53.4956	89.1384	-1.832	-1.51554
AHDC1	1	27534035	27604432	70397	-	12.4282	3.05973	1.99085	2.07137	0.00360778	0.0190005	1.65765	0.729143	1.65765	2.58394	1.55879	1.22215	2.24835
AHNAK	11	62433542	62556236	122694	-	456.275	109.242	73.5781	76.0458	2.79682e-06	0.000149968	0.612553	-0.707094	-1.63251	57.7743	94.3172	-1.85503	-1.43669
AIF1L	9	131096476	131123153	26677	+	18.1126	4.28705	2.8717	3.01876	0.00137985	0.00970349	0.577242	-0.792752	-1.73238	2.20963	3.8279	-2.3349	-1.28533
AL021368.2	6	57908560	57913912	5352	-	41.3129	9.65732	6.68728	6.88548	0.000230408	0.00281615	0.634057	-0.657315	-1.57714	5.3435	8.42747	-1.90728	-1.30416
AL033519.3	6	35555873	35556265	392	+	88.6366	21.4604	14.2385	14.7728	2.11824e-05	0.000595607	0.596886	-0.744473	-1.67536	11.0436	18.502	-1.97461	-1.42147
AL049830.1	14	30821419	30821844	425	+	7.26896	2.09516	1.08643	1.21149	0.000797511	0.00659824	0.427151	-1.22718	-2.34109	0.725207	1.69778	-3.57181	-1.53444
AL049830.3	14	30876179	30889809	13630	-	27.8416	6.78203	4.41346	4.64027	0.000252212	0.00299066	0.558575	-0.840178	-1.79027	3.32604	5.95451	-2.29578	-1.39607
AL049873.1	14	58794654	58795030	376	+	162.454	35.7527	26.3532	27.0756	1.0705e-05	0.00037462	0.641317	-0.64089	-1.55929	21.1587	32.9926	-1.78358	-1.36321
AL121871.1	X	92676519	92676955	436	-	33.2835	7.34889	5.372	5.54724	0.0010037	0.00777374	0.638112	-0.648118	-1.56712	4.32176	6.77273	-1.97323	-1.2446
AL122020.1	14	90766531	90766990	459	+	12.4797	3.1631	1.89892	2.07995	0.00208466	0.0129844	0.500524	-0.998488	-1.99791	1.3876	2.7723	-3.01351	-1.32458
AL136126.1	11	33237008	33237410	402	+	28.388	6.71991	4.53132	4.73133	0.00041844	0.00419629	0.581843	-0.781298	-1.71868	3.48061	5.98205	-2.18312	-1.35304
AL139100.2	6	34744176	34744674	498	+	6.7405	1.84479	1.0019	1.12342	0.00194565	0.0123147	0.441204	-1.18048	-2.26653	0.687836	1.559	-3.65583	-1.40519
AL139351.3	20	48025245	48060272	35027	+	8.60387	2.4557	1.25347	1.43398	0.00249179	0.0147009	0.433355	-1.20638	-2.30757	0.867087	2.00087	-3.8278	-1.39111
AL161787.1	9	87525302	87525476	174	+	12.9486	2.72076	2.09109	2.1581	0.00890855	0.0357276	1.52414	0.607999	1.52414	2.60623	1.70996	1.12168	2.07101
AL161945.1	20	52840936	52843776	2840	-	7.77351	1.87528	1.21458	1.29559	0.00119605	0.00882352	0.506039	-0.982678	-1.97613	0.870651	1.72052	-2.82344	-1.3831
AL162581.1	6	52995620	52995951	331	+	7.32111	2.10997	1.08802	1.22019	0.0014347	0.00997591	2.33191	1.22151	2.33191	1.70795	0.732425	1.49023	3.64895
AL354740.1	6	34248535	34286769	38234	+	186.127	48.8966	28.4163	31.0211	4.54774e-06	0.000209985	0.453167	-1.14188	-2.20669	19.3477	42.6944	-2.74089	-1.7766
AL355032.1	14	101677943	101678381	438	+	26.2352	6.20588	4.17334	4.37253	0.000734603	0.00623007	0.584792	-0.774005	-1.71001	3.22695	5.51812	-2.23292	-1.30956
AL358781.1	9	131497479	131500192	2713	-	286.152	67.7931	44.7293	47.6921	3.77951e-08	7.28405e-06	0.492109	-1.02295	-2.03207	31.4584	63.9257	-2.30439	-1.79193
AL390728.6	1	247187281	247188527	1246	-	19.6329	5.28537	3.12406	3.27215	0.00936857	0.0371447	0.621658	-0.685807	-1.6086	2.50874	4.03555	-2.22318	-1.16392
AL391684.1	10	99430919	99463260	32341	+	8.97798	2.58964	1.40434	1.49633	0.00351795	0.0186753	0.530867	-0.913578	-1.88371	1.03778	1.95488	-2.71701	-1.30598
AL391834.2	9	19375451	19375997	546	+	10.1193	2.8177	1.57203	1.68656	0.000562289	0.0051639	0.490593	-1.0274	-2.03835	1.11018	2.26294	-2.82928	-1.46852
AL445433.1	1	99008218	99008475	257	+	8.28918	2.10992	1.29746	1.38153	0.001958	0.0123811	0.522877	-0.935456	-1.9125	0.948692	1.81437	-2.75057	-1.32978
AL450405.1	6	117998975	117999449	474	+	569.59	127.346	90.1844	94.9317	1.13156e-08	2.95048e-06	0.528855	-0.919056	-1.89088	65.6767	124.187	-2.09269	-1.70853
AL450998.1	1	15828232	15828670	438	+	10.4772	2.81167	1.58759	1.7462	0.000615815	0.005474	2.18711	1.12903	2.18711	2.39661	1.09579	1.49431	3.20111
AL591846.2	1	206695837	206696270	433	-	58.1899	12.9623	9.36064	9.69831	1.65549e-05	0.000507252	0.595442	-0.747968	-1.67943	7.2391	12.1575	-1.97765	-1.42618
AL845472.2	9	41269916	41273998	4082	-	45.2968	10.2358	7.3014	7.54946	0.000174292	0.00230296	0.617939	-0.694464	-1.61828	5.76673	9.33219	-1.97114	-1.32859
ALDH1A3	15	100877714	100916627	38913	+	103.099	22.4622	16.5126	17.1832	5.51728e-07	4.95327e-05	0.570387	-0.809987	-1.7532	12.4824	21.884	-1.99056	-1.54414
ALKBH2	12	109088188	109093632	5444	-	182.663	40.9819	29.6167	30.4438	2.35516e-05	0.000639163	1.55288	0.634947	1.55288	37.0371	23.8506	1.34512	1.79274
ALPK1	4	112285509	112442622	157113	+	39.4901	8.77574	6.40494	6.58168	0.00052635	0.00492569	0.650596	-0.620165	-1.53705	5.18845	7.97491	-1.87708	-1.25862
AMFR	16	56361452	56425546	64094	-	81.0003	17.1983	13.1507	13.5	4.36382e-05	0.000942046	0.646026	-0.630335	-1.54792	10.5969	16.4032	-1.80519	-1.32732
AMIGO1	1	109504178	109509739	5561	-	48.3031	10.1897	7.83808	8.05051	6.86343e-05	0.00126035	0.637403	-0.649723	-1.56887	6.26775	9.83327	-1.85195	-1.32906
AMIGO2	12	47075707	47079952	4245	-	16.7328	3.66118	2.70681	2.78879	0.000893019	0.00714867	0.619133	-0.691679	-1.61516	2.13279	3.4448	-2.04794	-1.27384
ANAPC11	17	81890790	81900992	10202	+	72.0134	17.6684	11.5022	12.0022	4.85977e-05	0.00100468	1.72362	0.785438	1.72362	15.191	8.81346	1.42582	2.08361
ANKEF1	20	9986126	10058304	72178	+	78.6721	17.4572	12.7465	13.112	9.02431e-06	0.000334277	0.625877	-0.676049	-1.59776	10.0949	16.1292	-1.83468	-1.39144
ANKRD42	11	83193712	83260695	66983	+	19.0468	4.85924	3.03873	3.17446	0.00101535	0.0078455	0.583835	-0.776368	-1.71281	2.34034	4.00857	-2.24026	-1.30955
ANKRD6	6	89433152	89633835	200683	+	30.4905	7.93855	4.86959	5.08175	0.000941567	0.0074001	0.595818	-0.747056	-1.67836	3.79466	6.36883	-2.15521	-1.30703
ANKRD9	14	102501767	102509800	8033	-	22.8483	5.60714	3.676	3.80805	0.000681786	0.0059026	0.608587	-0.716466	-1.64315	2.88144	4.73465	-2.07852	-1.29898
ANOS1	X	8528874	8732138	203264	-	6.44822	1.65205	1.03109	1.0747	0.0120785	0.0447123	0.593168	-0.753486	-1.68586	0.800267	1.34914	-2.45643	-1.15701
ANXA11	10	80150889	80205573	54684	-	36.192	9.73399	5.49094	6.032	7.8586e-07	6.14728e-05	0.421664	-1.24583	-2.37156	3.57817	8.48583	-2.89926	-1.93991
ANXA4	2	69644425	69827113	182688	+	28.0187	6.52336	4.50985	4.66978	0.000582588	0.00529184	0.616402	-0.698056	-1.62232	3.56156	5.77799	-2.0402	-1.29003
AP000526.1	22	15794901	15797910	3009	+	7.67914	1.96867	1.19135	1.27986	0.0126452	0.0461079	1.8366	0.87704	1.8366	1.65733	0.902387	1.18412	2.84861
AP001107.5	11	66409158	66417138	7980	+	8.94917	2.11836	1.43793	1.49153	0.00839388	0.0341173	0.6159	-0.699232	-1.62364	1.13699	1.84607	-2.26969	-1.16148
AP002990.1	11	62559603	62591532	31929	-	12.1839	2.72007	1.96109	2.03064	0.0091402	0.0364376	0.638754	-0.646667	-1.56555	1.58301	2.47828	-2.15015	-1.13989
AP1S3	2	223751686	223838028	86342	-	48.4695	11.9656	7.68335	8.07825	0.000126605	0.00186859	0.559124	-0.838761	-1.78851	5.79395	10.3625	-2.23881	-1.42878
AP5B1	11	65773898	65780977	7079	-	26.2073	5.64879	4.23282	4.36789	0.000475543	0.0045891	0.623136	-0.682381	-1.60479	3.35374	5.38204	-1.99858	-1.28858
APCDD1	18	10454635	10489950	35315	+	8.09471	2.01749	1.25981	1.34912	0.00208042	0.0129641	0.515267	-0.956607	-1.94074	0.917536	1.7807	-2.83641	-1.3279
APH1B	15	63276018	63309127	33109	+	144.473	32.1878	22.9389	24.0788	5.05875e-08	9.09071e-06	0.536016	-0.899651	-1.86561	16.8053	31.3522	-2.08948	-1.66574
ARHGAP27P1-BPTFP1-KPNA2P3	17	64749663	64781708	32045	-	18.2895	3.85369	2.95481	3.04825	0.000601269	0.00538429	0.614046	-0.703582	-1.62854	2.31934	3.77715	-2.05319	-1.29173
ARHGAP29	1	94148988	94275069	126081	-	245.114	52.2821	39.6871	40.8523	3.8038e-07	3.8384e-05	0.621371	-0.686474	-1.60934	31.3123	50.3923	-1.7858	-1.45032
ARHGDIA	17	81867721	81871379	3658	-	364.941	85.4527	59.1306	60.8236	2.07677e-05	0.000588847	1.55481	0.636741	1.55481	74.0323	47.6149	1.35142	1.78882
ARHGEF26	3	154121003	154257828	136825	+	20.2478	4.59877	3.26335	3.37464	0.0004502	0.00442808	0.604872	-0.725298	-1.65324	2.54379	4.2055	-2.07586	-1.31666
ARHGEF28	5	73626158	73941994	315836	+	22.9923	5.9514	3.59643	3.83205	3.01659e-05	0.000738377	0.498401	-1.00462	-2.00642	2.54925	5.11485	-2.52987	-1.59127
ARHGEF4	2	130836916	131047264	210348	+	12.4634	3.19031	1.95263	2.07723	0.00263088	0.0151966	0.542456	-0.882421	-1.84347	1.46105	2.6934	-2.60607	-1.30402
ARL13B	3	93980139	94055679	75540	+	107.811	23.797	17.4752	17.9684	0.000121164	0.0018165	0.648133	-0.625638	-1.54289	14.1323	21.8046	-1.82159	-1.30683
ARL4C	2	234493041	234497082	4041	-	52.5562	10.894	8.54876	8.75937	0.000108668	0.00169697	0.65396	-0.612725	-1.52915	6.92675	10.592	-1.80333	-1.29665
ARMC2	6	108848416	108974477	126061	+	10.9651	2.4557	1.74986	1.82751	0.000916907	0.00727508	0.562103	-0.831093	-1.77903	1.31522	2.33981	-2.3722	-1.33419
ARNT2	15	80404350	80597934	193584	+	476.092	106.519	76.8323	79.3486	1.45149e-07	1.94969e-05	0.606205	-0.722123	-1.64961	59.8946	98.8026	-1.82279	-1.49288
ARNTL	11	13276652	13387267	110615	+	19.6129	4.71399	3.17533	3.26882	0.0025258	0.0148161	0.64359	-0.635786	-1.55378	2.55998	3.97766	-1.98951	-1.21349
ARNTL2	12	27332854	27425290	92436	+	177.679	37.4145	28.8499	29.6132	2.54373e-06	0.000142128	0.639632	-0.644686	-1.5634	23.1046	36.1218	-1.75762	-1.39064
ARPIN	15	89895006	89912953	17947	-	219.972	44.783	35.9116	36.662	8.632e-07	6.5378e-05	0.666482	-0.585363	-1.50042	29.3248	43.9993	-1.65098	-1.36359
ASIC4	2	219514170	219538773	24603	+	10.3162	2.97355	1.4728	1.71936	2.56839e-05	0.000665778	2.95537	1.56334	2.95537	2.56935	0.869383	2.05556	4.24905
ATCAY	19	3879864	3928083	48219	+	361.894	83.1263	58.4537	60.3157	2.25121e-06	0.000132463	1.61705	0.693365	1.61705	74.537	46.0945	1.4286	1.83036
ATP2B4	1	203626561	203744082	117521	+	263.354	58.9581	42.4738	43.8923	2.94952e-07	3.22775e-05	0.60304	-0.729675	-1.65827	33.0233	54.7614	-1.84657	-1.48917
ATP6V0E2-AS1	7	149867697	149880611	12914	-	9.18204	2.23246	1.40719	1.53034	0.000154331	0.00212673	0.447105	-1.16131	-2.23661	0.945644	2.11504	-3.09924	-1.61408
B4GALT4	3	119211732	119240947	29215	-	62.8374	14.5703	10.1161	10.4729	1.28727e-05	0.000426886	0.597973	-0.741848	-1.67232	7.83807	13.1077	-1.95697	-1.42907
BACE2	21	41167801	41282531	114730	+	14.898	3.25935	2.41203	2.483	0.00193878	0.0122829	0.630534	-0.665353	-1.58596	1.92037	3.04563	-2.04856	-1.22782
BAK1	6	33572547	33580294	7747	-	48.107	10.6392	7.77611	8.01783	6.19766e-05	0.00118228	0.620069	-0.689499	-1.61272	6.13753	9.89813	-1.9173	-1.35653
BBOF1	14	74019349	74082864	63515	+	7.3835	1.70916	1.18727	1.23058	0.00667537	0.0290285	0.600497	-0.735772	-1.66529	0.923415	1.53775	-2.33966	-1.18529
BCKDHA	19	41397808	41425003	27195	+	27.9112	6.42069	4.51496	4.65187	0.00490767	0.023501	1.50382	0.588635	1.50382	5.58793	3.71582	1.16645	1.93877
BCL6B	17	7023050	7030291	7241	+	6.40933	1.38416	1.02942	1.06822	0.0129187	0.0468483	0.612153	-0.708037	-1.63358	0.811231	1.32521	-2.37528	-1.12348
BDKRB2	14	96204679	96244167	39488	+	7.51314	1.82289	1.1592	1.25219	0.000290305	0.00329582	0.45774	-1.1274	-2.18465	0.786392	1.71799	-3.06626	-1.55652
BIVM	13	102799119	102841534	42415	+	257.902	60.5781	40.8281	42.9837	2.59259e-08	5.74604e-06	0.52776	-0.922047	-1.8948	29.6972	56.2703	-2.11257	-1.69948
BLACAT1	1	205434885	205457092	22207	-	7.65058	2.18838	1.1212	1.2751	0.00050998	0.00481914	0.400589	-1.31981	-2.49633	0.729392	1.8208	-3.87408	-1.60855
BMF	15	40087890	40108893	21003	-	23.047	4.90445	3.73981	3.84117	0.00065089	0.00571788	0.639214	-0.645629	-1.56442	2.99574	4.6866	-1.93876	-1.26236
BNC2	9	16409503	16870844	461341	-	43.5471	10.1375	6.89083	7.25786	2.70979e-06	0.000148279	0.526004	-0.926853	-1.90112	5.00348	9.51223	-2.24986	-1.60644
BOP1	8	144262045	144291439	29394	-	37.027	8.80924	5.89603	6.17117	0.0050762	0.0241342	1.59301	0.671758	1.59301	7.5825	4.75984	1.18001	2.15057
BRI3BP	12	124993645	125031232	37587	+	666.96	165.499	99.2099	111.16	5.82243e-12	2.58089e-08	0.378734	-1.40074	-2.64037	61.0707	161.249	-2.86037	-2.4373
BTBD8	1	92080305	92184726	104421	+	12.8939	3.23792	1.96695	2.14898	3.21675e-05	0.000773533	0.433692	-1.20526	-2.30578	1.30013	2.99782	-3.05838	-1.73838
BX322234.1	6	169213254	169245774	32520	+	11.4752	3.47549	1.6519	1.91254	0.00018459	0.00239949	0.371	-1.43051	-2.69542	1.03509	2.78999	-4.08343	-1.77921
BX679664.3	1	108992282	108992837	555	+	1091.43	247.58	172.899	181.905	4.6598e-09	1.87776e-06	0.529953	-0.916063	-1.88696	126.019	237.792	-2.07165	-1.71874
C15orf62	15	40769980	40772450	2470	+	7.10809	1.66663	1.11864	1.18468	0.000973647	0.00759833	0.509326	-0.97334	-1.96338	0.799548	1.56982	-2.75356	-1.39996
C15orf65	15	55408495	55418799	10304	+	10.9425	2.67893	1.74809	1.82375	0.0103527	0.0400003	0.621205	-0.686858	-1.60977	1.39763	2.24987	-2.28186	-1.13564
C18orf32	18	49477250	49487253	10003	-	201.536	49.8618	32.2379	33.5893	0.00113324	0.00850918	1.58114	0.660968	1.58114	41.1519	26.0267	1.24649	2.00565
C1QL3	10	16513734	16521880	8146	-	44.0411	9.61833	7.13427	7.34018	5.08213e-05	0.00103263	0.625455	-0.677021	-1.59884	5.64882	9.03153	-1.88848	-1.35362
C1orf115	1	220690363	220699154	8791	+	75.967	16.1896	12.3796	12.6612	4.62724e-05	0.000972086	0.662665	-0.593649	-1.50906	10.0924	15.23	-1.7429	-1.30659
C20orf27	20	3753508	3767782	14274	-	44.1201	10.6011	7.08031	7.35336	0.000229117	0.00280811	1.6606	0.731701	1.6606	9.17911	5.5276	1.3473	2.04675
C2orf72	2	231037523	231049720	12197	+	28.9812	8.18988	4.36704	4.8302	1.33892e-05	0.00043779	0.423109	-1.2409	-2.36346	2.87216	6.78823	-3.08299	-1.81186
C3orf52	3	112086335	112131005	44670	+	14.7452	3.32879	2.36871	2.45753	0.0016566	0.0110008	0.60205	-0.732046	-1.66099	1.84708	3.06799	-2.18058	-1.26521
C7orf25	7	42908726	42912306	3580	-	6.70366	1.85297	1.04518	1.11728	0.013111	0.0473263	0.545748	-0.873693	-1.83235	0.78894	1.44561	-2.82446	-1.18872
CA5B	X	15688830	15788412	99582	+	15.5696	3.86971	2.46825	2.59493	0.000457109	0.00446303	0.54945	-0.86394	-1.82	1.84037	3.34948	-2.39124	-1.38523
CACNB4	2	151832768	152099476	266708	-	69.6108	16.5225	10.9311	11.6018	4.71682e-06	0.000214076	0.514745	-0.958071	-1.94271	7.88511	15.3185	-2.34075	-1.61236
CACNG5	17	66835117	66894752	59635	+	9.0613	2.3201	1.38588	1.51022	0.000241929	0.00291564	0.446606	-1.16292	-2.23911	0.932489	2.08794	-3.13658	-1.59843
CAMK1	3	9757347	9769993	12646	-	10.6837	2.92258	1.66487	1.78062	0.00155142	0.0105259	0.516804	-0.952309	-1.93497	1.21338	2.34785	-2.74198	-1.36547
CAPN10-DT	2	240582700	240586700	4000	-	8.79976	1.91993	1.42666	1.46663	0.0120077	0.0446153	0.647712	-0.626575	-1.5439	1.15306	1.7802	-2.12698	-1.12066
CAPRIN2	12	30709552	30754952	45400	-	61.3165	14.064	9.86514	10.2194	0.00013984	0.00199955	0.614702	-0.702041	-1.6268	7.78087	12.658	-1.97572	-1.33951
CARF	2	202912214	202988264	76050	+	40.653	9.61834	6.5043	6.77549	0.00033135	0.00361764	0.596167	-0.746212	-1.67738	5.06128	8.4897	-2.10294	-1.33794
CASC2	10	118046279	118210159	163880	+	6.51244	1.6074	1.02361	1.08541	0.0124761	0.0456166	0.570923	-0.808632	-1.75155	0.788942	1.38187	-2.6873	-1.14164
CASP6	4	109688622	109703584	14962	-	24.1799	6.50618	3.49628	4.02998	8.42137e-07	6.43605e-05	0.344845	-1.53598	-2.89985	2.06673	5.99323	-3.73319	-2.25254
CASP7	10	113679162	113730908	51746	+	77.7761	16.2517	12.6679	12.9627	2.46642e-05	0.000652057	0.656676	-0.606746	-1.52282	10.2763	15.649	-1.74866	-1.32615
CCBE1	18	59430939	59697663	266724	-	17.9117	4.23784	2.86654	2.98528	0.000447211	0.00440846	0.579478	-0.787174	-1.72569	2.19047	3.78008	-2.21259	-1.34594
CCDC113	16	58231157	58283837	52680	+	57.1251	12.0943	9.2139	9.52085	7.02537e-05	0.00127571	0.617086	-0.696457	-1.62052	7.26638	11.7753	-1.9401	-1.35359
CCDC122	13	43823909	43879741	55832	-	29.7742	6.4293	4.84692	4.96237	0.000491632	0.00470679	0.656516	-0.607097	-1.52319	3.93341	5.99133	-1.84797	-1.25549
CCDC152	5	42756818	42802440	45622	+	20.8839	5.08931	3.28368	3.48065	7.4177e-05	0.00131696	0.517264	-0.951026	-1.93325	2.37324	4.58806	-2.46821	-1.51423
CCDC167	6	37482938	37499894	16956	-	77.4086	18.7457	12.2673	12.9014	0.000271819	0.00315277	1.74383	0.802256	1.74383	16.3989	9.40397	1.37457	2.21227
CCDC3	10	12896625	13099653	203028	-	371.575	80.2402	60.5398	61.9292	1.64096e-06	0.000106446	0.660335	-0.598729	-1.51438	49.26	74.5985	-1.68023	-1.36491
CCDC39	3	180602858	180870934	268076	-	11.2466	2.857	1.71296	1.87443	0.00115206	0.00860683	0.480189	-1.05833	-2.08251	1.21617	2.53269	-3.07574	-1.41002
CCDC40	17	80036632	80100614	63982	+	8.82031	2.23801	1.3345	1.47005	0.00121	0.00887536	0.462761	-1.11166	-2.16094	0.930135	2.00997	-3.2896	-1.41953
CCDC71L	7	106654360	106661159	6799	-	58.1521	13.0817	9.35767	9.69202	2.9832e-05	0.000735069	0.600276	-0.736302	-1.6659	7.27111	12.1129	-1.97477	-1.40534
CCDC9B	15	40331452	40340968	9516	-	9.48974	2.4714	1.42064	1.58162	0.000132967	0.00193882	0.411828	-1.27989	-2.4282	0.922714	2.24053	-3.4659	-1.70119
CCNE1	19	29811991	29824313	12322	+	42.6081	9.55461	6.80956	7.10134	1.26032e-05	0.000424764	0.564959	-0.823782	-1.77004	5.12725	9.07544	-2.10752	-1.4866
CCNYL2	10	42408168	42475350	67182	-	10.3207	2.76823	1.50156	1.72011	0.00061112	0.00545048	0.402294	-1.31368	-2.48575	0.98694	2.45328	-3.92826	-1.57294
CCT4	2	61868085	61888672	20587	-	4530.68	981.433	730.757	755.114	5.73474e-09	2.01482e-06	0.599513	-0.738138	-1.66802	566.048	944.18	-1.80046	-1.54533
CCT7	2	73233420	73253022	19602	+	2655.18	629.935	418.071	442.53	3.55349e-09	1.57514e-06	0.510907	-0.968867	-1.9573	299.279	585.78	-2.15498	-1.77776
CD109	6	73695785	73828317	132532	+	20.5599	4.48879	3.29353	3.42666	0.00031349	0.00348852	0.583598	-0.776952	-1.71351	2.52563	4.32769	-2.17152	-1.3521
CD24P4	Y	18992467	18992710	243	-	13.7278	2.98312	2.22218	2.28797	0.00287306	0.0162027	1.58039	0.660281	1.58039	2.80258	1.77335	1.20926	2.06543
CD302	2	159768628	159798256	29628	-	27.5816	7.06215	4.26225	4.59694	3.74448e-05	0.00084254	0.475571	-1.07227	-2.10273	2.96315	6.23072	-2.70091	-1.63704
CD34	1	207880972	207911403	30431	-	12.0492	3.71407	1.62183	2.0082	8.88329e-06	0.000329972	0.278657	-1.84344	-3.58864	0.875293	3.14111	-5.2766	-2.44065
CD58	1	116514534	116571040	56506	-	26.8009	6.07213	4.30563	4.46682	0.000367506	0.00387997	0.602091	-0.731947	-1.66088	3.3574	5.57624	-2.08308	-1.32425
CD9	12	6199715	6238272	38557	+	56.0259	14.6655	8.45651	9.33765	1.73979e-07	2.15092e-05	0.411512	-1.28099	-2.43006	5.4446	13.2307	-2.911	-2.02858
CDHR1	10	84194537	84219622	25085	+	58.5211	12.7601	9.49421	9.75352	3.60289e-05	0.000821806	0.635258	-0.654585	-1.57416	7.57802	11.929	-1.83776	-1.34837
CDK18	1	205504595	205532794	28199	+	11.419	2.67314	1.81849	1.90317	0.00794527	0.0328635	0.602517	-0.730925	-1.6597	1.43111	2.37522	-2.33784	-1.17827
CDKL2	4	75576496	75630717	54221	-	22.8684	5.44706	3.66877	3.81141	0.000303409	0.00340483	0.588967	-0.763742	-1.69789	2.82547	4.79734	-2.13141	-1.35254
CDYL	6	4706159	4955552	249393	+	15.7304	3.70582	2.50745	2.62174	0.00034252	0.0036941	0.558929	-0.839264	-1.78914	1.87996	3.36351	-2.30687	-1.3876
CDYL2	16	80597907	80804599	206692	-	34.4651	7.6185	5.52195	5.74418	0.000123147	0.00182973	0.588319	-0.76533	-1.69976	4.25533	7.23303	-2.09716	-1.37766
CELF6	15	72284727	72320158	35431	-	15.0913	4.14157	2.3203	2.51522	7.96381e-05	0.00135906	0.45987	-1.1207	-2.17453	1.58463	3.44582	-2.89283	-1.63458
CEP126	11	101915010	102001063	86053	+	19.8743	4.24159	3.24199	3.31238	0.00164258	0.0109495	0.666073	-0.586247	-1.50134	2.64849	3.97627	-1.86853	-1.2063
CFAP300	11	102047437	102084555	37118	+	10.5156	2.33324	1.67122	1.7526	0.00124983	0.00907712	0.557442	-0.843108	-1.79391	1.25459	2.25062	-2.4407	-1.31852
CFAP44	3	113286930	113441611	154681	-	15.7763	3.27684	2.53672	2.62938	0.00447937	0.0220128	0.635167	-0.654793	-1.57439	2.04272	3.21604	-2.11685	-1.17094
CGNL1	15	57375967	57550728	174761	+	9.3413	2.66654	1.28383	1.55688	7.84567e-06	0.000306953	0.288804	-1.79184	-3.46256	0.697754	2.41601	-4.98713	-2.40405
CHDH	3	53812335	53846420	34085	-	19.6883	4.79352	2.95463	3.28138	3.04615e-06	0.000158136	0.400681	-1.31947	-2.49575	1.87736	4.68541	-3.18909	-1.95315
CHKB-DT	22	50583026	50595635	12609	+	15.083	3.88357	2.32205	2.51383	0.000930451	0.00735682	0.505186	-0.985114	-1.97947	1.68744	3.34023	-2.82666	-1.38619
CHRNA1	2	174747592	174787936	40344	-	18.5498	4.24159	2.96115	3.09164	0.00410217	0.0206631	0.616555	-0.697697	-1.62191	2.35831	3.82497	-2.2094	-1.19064
CHST15	10	124007668	124093599	85931	-	30.2987	7.31314	4.65106	5.04979	9.5321e-06	0.000347282	0.455937	-1.13309	-2.19328	3.16275	6.93682	-2.78172	-1.72932
CIAPIN1P	18	26599408	26600339	931	+	9.72065	2.21985	1.56496	1.62011	0.00997958	0.0390089	1.58583	0.665243	1.58583	1.98715	1.25306	1.13903	2.2079
CIB2	15	78104606	78131536	26930	-	19.3168	4.10208	3.14504	3.21946	0.0022092	0.0135258	0.662748	-0.593467	-1.50887	2.56647	3.87246	-1.90161	-1.19724
CKMT1A	15	43692886	43699223	6337	+	233.987	63.3665	31.5369	38.9978	7.88773e-12	2.62227e-08	0.260355	-1.94145	-3.8409	16.1118	61.8838	-4.30468	-3.42709
CKMT1B	15	43593054	43604902	11848	+	277.794	85.2889	36.3503	46.299	5.95868e-10	5.10841e-07	0.240396	-2.05651	-4.1598	17.9461	74.652	-4.95521	-3.49207
CLDN11	3	170418868	170454734	35866	+	6.41867	1.52378	1.01383	1.06978	0.00983226	0.0386035	0.565104	-0.823412	-1.76959	0.772518	1.36704	-2.65367	-1.18004
CLGN	4	140388453	140427662	39209	-	264.901	56.8522	42.8716	44.1502	4.90168e-07	4.52656e-05	0.620228	-0.689128	-1.61231	33.8017	54.4987	-1.79346	-1.44945
CLSTN2	3	139935185	140577398	642213	+	82.5457	18.2716	13.4306	13.7576	0.00015821	0.00216329	1.50341	0.588235	1.50341	16.5241	10.9911	1.27841	1.768
CLUHP3	16	31700590	31711987	11397	+	13.5918	3.27836	2.19593	2.26529	0.00334542	0.0180257	0.627753	-0.671731	-1.59298	1.74725	2.78334	-2.09507	-1.21122
CMPK2	2	6840570	6866636	26066	-	13.1572	3.03611	2.06517	2.19286	9.83957e-05	0.00158399	0.501072	-0.996909	-1.99572	1.46399	2.92172	-2.59922	-1.53234
CMTM4	16	66614750	66696708	81958	-	259.771	59.0085	40.6181	43.2951	5.88349e-09	2.01482e-06	0.488954	-1.03223	-2.04518	28.4352	58.1551	-2.2772	-1.8368
CNTN1	12	40692439	41072416	379977	+	487.249	98.7063	79.5261	81.2082	1.84223e-07	2.22708e-05	0.665182	-0.588178	-1.50335	64.8797	97.5367	-1.63397	-1.38317
CNTN2	1	205042937	205078290	35353	+	1761.15	394.082	284.491	293.525	5.95881e-07	5.14548e-05	1.62143	0.697269	1.62143	363.108	223.943	1.45252	1.80999
CNTNAP2	7	146116002	148420999	2304997	+	389.811	84.6596	62.7795	64.9685	2.91297e-08	6.06571e-06	0.592942	-0.754037	-1.6865	48.3665	81.5704	-1.84576	-1.54099
COL1A1	17	50184101	50201633	17532	-	9.38393	2.27711	1.43164	1.56399	8.7359e-05	0.0014485	0.433383	-1.20629	-2.30743	0.945742	2.18223	-3.16438	-1.68255
COL25A1	4	108808725	109302753	494028	-	69.1227	17.0554	10.6591	11.5204	3.39197e-07	3.58804e-05	0.457941	-1.12677	-2.18369	7.23718	15.8037	-2.58487	-1.84477
COL6A1	21	45981769	46005051	23282	+	77.3889	18.9612	12.1613	12.8982	1.75386e-06	0.000112129	1.95394	0.966386	1.95394	17.0635	8.73285	1.65125	2.31212
CPEB2	4	15002674	15070154	67480	+	33.4923	7.43995	5.43317	5.58206	0.000525163	0.00492181	1.5449	0.627512	1.5449	6.77725	4.38686	1.26175	1.89159
CPM	12	68842197	68971571	129374	-	7.03352	2.14285	1.05282	1.17225	0.00164363	0.0109504	0.434078	-1.20397	-2.30373	0.709654	1.63485	-3.56329	-1.48941
CPOX	3	98579446	98593649	14203	-	93.7779	22.9981	14.5818	15.6296	2.153e-07	2.48961e-05	0.478166	-1.06442	-2.09133	10.1119	21.1474	-2.43747	-1.79433
CPT1A	11	68754620	68844411	89791	-	205.583	44.2313	33.3578	34.2638	4.4705e-07	4.30787e-05	0.631032	-0.664214	-1.58471	26.5127	42.0149	-1.75473	-1.43115
CPT1B	22	50568861	50578466	9605	-	9.64281	2.27767	1.52416	1.60714	0.0101341	0.039419	0.602328	-0.731378	-1.66022	1.20827	2.006	-2.44214	-1.12866
CRABP1	15	78340353	78348226	7873	+	137.11	29.7111	22.308	22.8517	7.69404e-05	0.00133701	0.665128	-0.588297	-1.50347	18.256	27.4474	-1.74493	-1.29542
CRABP2	1	156699606	156705817	6211	-	99.2704	21.2364	16.14	16.5451	1.66877e-05	0.000510146	0.649295	-0.623055	-1.54013	13.0269	20.0632	-1.76544	-1.34358
CROCCP2	1	16618253	16657233	38980	-	10.6717	2.52369	1.72946	1.77862	0.0120263	0.0446347	0.656131	-0.607945	-1.52409	1.40931	2.14792	-2.07286	-1.12059
CRPPA	7	16087525	16421539	334014	-	18.8033	4.46482	3.03914	3.13388	0.00642713	0.0282539	0.65982	-0.599855	-1.51556	2.49159	3.77617	-1.99806	-1.14958
CSNK1E	22	38290691	38318085	27394	-	307.92	70.5942	47.876	51.32	2.01272e-09	1.1637e-06	0.473014	-1.08004	-2.1141	32.9597	69.6802	-2.34183	-1.90852
CSPG4P10	15	82459472	82477259	17787	+	8.44795	2.06882	1.29742	1.40799	0.00324871	0.0176874	1.95163	0.964677	1.95163	1.86194	0.954045	1.2749	2.98756
CTBS	1	84549611	84574481	24870	-	77.2654	16.5517	12.5002	12.8776	9.59698e-05	0.00155219	0.636004	-0.652893	-1.57232	10.0124	15.7427	-1.87004	-1.32199
CTHRC1	8	103371538	103382990	11452	+	6.9048	2.09852	1.02481	1.1508	0.000306538	0.00342838	0.394733	-1.34105	-2.53336	0.651391	1.65021	-3.75707	-1.70822
CTSO	4	155924118	155953867	29749	-	10.6732	2.23246	1.7306	1.77886	0.00394548	0.0201563	0.63168	-0.662735	-1.58308	1.37732	2.1804	-2.10001	-1.1934
CTSV	9	97029677	97039644	9967	-	32.3992	7.38041	5.10052	5.39987	1.51466e-05	0.000476014	0.517394	-0.950665	-1.93276	3.68244	7.11729	-2.37781	-1.57101
CXCL12	10	44370165	44386494	16329	-	10.2766	2.76823	1.43439	1.71277	4.18768e-05	0.000914412	0.322299	-1.63353	-3.10271	0.834945	2.59059	-4.67173	-2.06065
CYP26B1	2	72129238	72148039	18801	-	11.907	3.32879	1.72508	1.9845	6.09988e-06	0.000259843	0.34544	-1.53349	-2.89486	1.01904	2.94996	-3.91887	-2.13842
CYP2U1	4	107931549	107953462	21913	+	105.687	23.2362	16.9597	17.6146	1.04888e-06	7.49896e-05	0.580294	-0.785145	-1.72327	12.9363	22.2928	-1.96458	-1.51159
CYRIA	2	16549459	16666332	116873	-	55.5683	11.5705	9.05752	9.26139	6.08588e-05	0.00117034	0.659905	-0.599669	-1.51537	7.36384	11.1589	-1.7616	-1.30355
CYSTM1	5	140175156	140282053	106897	+	16.9409	3.99976	2.66298	2.82348	4.87451e-05	0.00100468	0.506164	-0.982322	-1.97564	1.89773	3.74923	-2.51341	-1.55294
DAAM2	6	39792298	39904878	112580	+	41.8844	9.49275	6.79687	6.98073	0.000354682	0.00378841	0.649556	-0.622475	-1.53951	5.49769	8.46377	-1.86246	-1.27256
DBNDD2	20	45406057	45410611	4554	+	16.7541	4.33746	2.48644	2.79234	3.09898e-06	0.00015973	0.380273	-1.39489	-2.62969	1.53861	4.04607	-3.4049	-2.03098
DCC	18	52340197	53535904	1195707	+	186.656	39.3445	30.3485	31.1093	1.2071e-06	8.27426e-05	1.553	0.635054	1.553	37.8478	24.3709	1.39507	1.7288
DDX58	9	32455302	32526209	70907	-	17.4522	3.83413	2.8298	2.9087	0.00276151	0.015727	1.54428	0.626936	1.54428	3.53094	2.28646	1.20108	1.98555
DEK	6	18223860	18264549	40689	-	3979.2	893.865	641.559	663.2	4.61301e-06	0.00021153	0.615734	-0.699622	-1.62408	505.472	820.927	-1.85553	-1.4215
DENND1B	1	197504748	197775697	270949	-	79.961	17.6177	12.7186	13.3268	2.77855e-05	0.000705059	0.565405	-0.822643	-1.76864	9.62698	17.0267	-2.14627	-1.45746
DFFA	1	10456522	10472530	16008	-	405.875	96.4314	62.0335	67.6458	9.78789e-11	1.44622e-07	0.430644	-1.21543	-2.32211	40.7247	94.567	-2.53673	-2.12564
DGAT2	11	75759512	75801536	42024	+	32.1031	7.62763	5.20401	5.35052	0.00131429	0.00935622	1.52706	0.610761	1.52706	6.46647	4.23457	1.22666	1.90104
DGKA	12	55927319	55954028	26709	+	21.5316	5.22611	3.38394	3.58861	8.59404e-05	0.00143212	0.516235	-0.9539	-1.9371	2.44364	4.73357	-2.47413	-1.51664
DHRS7	14	60144119	60169857	25738	-	259.378	54.5798	41.9568	43.2296	6.48933e-08	1.07869e-05	0.612598	-0.706988	-1.63239	32.8444	53.6149	-1.78779	-1.4905
DKK3	11	11956207	12009770	53563	-	67.2502	14.7886	10.6999	11.2084	6.13557e-06	0.000259843	0.553876	-0.852366	-1.80546	7.9904	14.4263	-2.14045	-1.52289
DLEU2	13	49956670	50125721	169051	-	75.3868	19.0013	11.8475	12.5645	0.000209711	0.00264475	0.547256	-0.869711	-1.8273	8.88797	16.241	-2.34766	-1.42227
DLX4	17	49968970	49974960	5990	+	30.4665	7.66617	4.75639	5.07775	5.23302e-06	0.000231962	0.487915	-1.0353	-2.04954	3.33018	6.82533	-2.50474	-1.67706
DNA2	10	68414064	68472122	58058	-	430.525	108.716	64.0902	71.7542	1.35284e-11	3.59802e-08	0.380076	-1.39564	-2.63105	39.5225	103.986	-2.86625	-2.41515
DNAAF4	15	55410525	55508235	97710	-	9.68226	2.48042	1.5122	1.61371	0.0115764	0.0434338	0.584452	-0.774843	-1.711	1.19049	2.03693	-2.59749	-1.12706
DNAH6	2	84516455	84819590	303135	+	30.6624	7.31313	4.93431	5.11039	0.000144708	0.00204829	0.59995	-0.737087	-1.66681	3.83259	6.38819	-2.03898	-1.36257
DNAL1	14	73644875	73703733	58858	+	172.573	37.9711	27.7312	28.7621	3.86939e-07	3.8664e-05	0.586171	-0.770605	-1.70599	21.2582	36.2661	-1.91717	-1.51807
DOCK9	13	98793429	99086626	293197	-	93.6097	22.0112	14.5613	15.6016	1.46313e-06	9.72838e-05	0.487082	-1.03776	-2.05304	10.2204	20.9829	-2.4595	-1.71376
DPY19L2	12	63558913	63668940	110027	-	33.0166	7.46171	5.28705	5.50277	0.000147607	0.00207273	0.587616	-0.767054	-1.70179	4.07343	6.93212	-2.10942	-1.37293
DRAXIN	1	11691710	11725858	34148	+	62.0193	15.4331	9.73532	10.3365	6.49082e-07	5.46297e-05	0.502343	-0.993256	-1.99067	6.91253	13.7606	-2.32943	-1.70118
DRGX	10	49364181	49396017	31836	-	30.365	7.57607	4.4592	5.06083	3.28155e-07	3.52885e-05	2.74334	1.45593	2.74334	7.41775	2.70392	2.20366	3.41518
DTX3L	3	122564338	122575204	10866	+	83.8244	17.57	13.6307	13.9707	1.05575e-05	0.000370432	0.644889	-0.632878	-1.55066	10.9546	16.9868	-1.76981	-1.35864
DUSP22	6	291630	351356	59726	+	19.8628	5.19013	3.03424	3.31046	1.41105e-05	0.000454337	0.440734	-1.18202	-2.26894	2.0254	4.59552	-2.92634	-1.75923
DYRK1B	19	39825350	39834202	8852	-	9.00488	2.06858	1.44609	1.50081	0.00268536	0.0154188	1.70421	0.769106	1.70421	1.89165	1.10998	1.25318	2.31757
E2F8	11	19224063	19241621	17558	-	65.5783	13.4751	10.6641	10.9297	3.40499e-05	0.000797174	0.64825	-0.625378	-1.54262	8.59722	13.2622	-1.78877	-1.33034
EEF1A1P13	5	14651941	14653330	1389	-	201.666	42.7351	32.8623	33.611	1.6289e-06	0.000106182	1.5212	0.605207	1.5212	40.5593	26.6628	1.36988	1.68922
EEF1A1P19	5	43495073	43496455	1382	-	117.099	23.7642	19.0443	19.5165	3.3913e-05	0.000795817	1.51944	0.603539	1.51944	23.5403	15.4927	1.31577	1.75463
EEF1A1P4	12	19456244	19457649	1405	-	74.0874	17.3683	12.013	12.3479	0.000357639	0.00380776	1.52067	0.604704	1.52067	14.8985	9.79733	1.26414	1.82925
EEF1AKMT4	3	184249672	184258760	9088	+	18.0017	4.568	2.88662	3.00028	0.0135451	0.0484072	1.54807	0.630469	1.54807	3.64562	2.35495	1.13141	2.11816
EEF1D	8	143579697	143599542	19845	-	177.483	41.3996	28.6515	29.5805	0.000110518	0.0017109	1.57278	0.653321	1.57278	36.166	22.9949	1.32141	1.87198
EEF1G	11	62559596	62574087	14491	-	2392.91	561.399	372.437	398.818	8.21783e-08	1.30096e-05	0.485272	-1.04313	-2.0607	260.606	537.03	-2.36575	-1.79498
EFHC1	6	52362123	52529887	167764	+	61.3845	13.3943	9.95819	10.2308	6.12318e-05	0.00117498	0.63992	-0.644036	-1.56269	7.98438	12.4771	-1.83686	-1.32945
EFHD1	2	232606057	232682781	76724	+	11.6692	2.5237	1.89983	1.94487	0.00873615	0.0352147	0.666393	-0.585556	-1.50062	1.55551	2.33422	-1.98914	-1.13207
EGFLAM	5	38258409	38465481	207072	+	464.732	97.0863	75.7436	77.4554	1.11169e-06	7.81447e-05	1.51045	0.594976	1.51045	93.2043	61.7064	1.3668	1.6692
EGFR	7	55019017	55211629	192612	+	135.419	28.797	22.0548	22.5698	2.83104e-06	0.000151193	0.652822	-0.615239	-1.53181	17.8289	27.3106	-1.71408	-1.36893
EHD1	11	64851642	64888297	36655	-	36.125	7.80001	5.84298	6.02084	0.000372535	0.00390691	1.5773	0.657454	1.5773	7.36946	4.67221	1.28585	1.9348
EHD4	15	41895933	41972558	76625	-	20.0597	4.59876	3.14054	3.34328	0.000834228	0.00682261	0.541354	-0.885356	-1.84722	2.34845	4.33811	-2.5353	-1.34589
EIF4G1	3	184314495	184335359	20864	+	1363.53	308.661	219.26	227.255	3.81012e-07	3.8384e-05	0.595277	-0.748368	-1.67989	169.6	284.909	-1.88194	-1.49953
EIF4G3	1	20806292	21176889	370597	-	358.71	76.5257	57.7588	59.785	2.82246e-08	6.05372e-06	0.591721	-0.757012	-1.68999	44.45	75.1199	-1.84985	-1.54394
ELL2	5	95885098	95961852	76754	-	19.6467	4.81726	3.16926	3.27445	0.00669745	0.0290959	0.654962	-0.610517	-1.52681	2.59177	3.95713	-2.02186	-1.15297
ELMO2	20	46366050	46432986	66936	-	136.797	34.0433	21.438	22.7995	9.16368e-08	1.41696e-05	0.498146	-1.00536	-2.00744	15.1621	30.437	-2.29274	-1.75765
ELOB	16	2771414	2777281	5867	-	57.5996	13.9193	9.2041	9.59994	0.00103175	0.00792617	1.63485	0.709158	1.63485	11.913	7.28689	1.27986	2.0883
ELOVL7	5	60751791	60844275	92484	-	17.4561	5.04524	2.59885	2.90935	0.000175221	0.0023116	0.422001	-1.24468	-2.36966	1.72679	4.09191	-3.38558	-1.65859
EMB	5	50396192	50443249	47057	-	119.28	26.5006	19.3855	19.8799	0.000151677	0.00210763	0.665762	-0.586922	-1.50204	15.891	23.8689	-1.76936	-1.27511
EML2	19	45606994	45645630	38636	-	7.68958	2.06792	1.19842	1.2816	0.00157461	0.0106615	0.503993	-0.988526	-1.98416	0.858934	1.70426	-2.85954	-1.37675
EML5	14	88612431	88792753	180322	-	236.639	49.3475	38.6054	39.4399	7.45556e-07	5.95143e-05	0.662475	-0.594061	-1.50949	31.4326	47.4472	-1.66107	-1.37174
EML6	2	54723499	54972026	248527	+	13.4406	3.19031	2.13585	2.24011	0.00111362	0.00839504	0.565226	-0.8231	-1.7692	1.61787	2.86234	-2.37892	-1.31576
ENC1	5	74627406	74641425	14019	-	263.401	54.5995	42.7131	43.9002	8.34992e-07	6.41834e-05	1.5829	0.662569	1.5829	53.8074	33.9929	1.4202	1.76423
ENPP1	6	131808016	131895156	87140	+	24.8958	5.58101	4.01695	4.1493	0.000211187	0.00265441	0.607229	-0.719688	-1.64683	3.1353	5.16329	-2.02529	-1.33909
ENPP2	8	119557086	119673454	116368	-	47.2051	11.0453	7.61029	7.86751	0.00114036	0.00855299	0.644237	-0.634336	-1.55222	6.16522	9.5698	-1.94992	-1.23564
ENTPD5	14	73958010	74019400	61390	-	50.2019	11.9349	7.84551	8.36699	1.03661e-06	7.49179e-05	0.490423	-1.0279	-2.03906	5.50631	11.2277	-2.41963	-1.71834
ERO1B	1	236215101	236281959	66858	-	55.5448	12.8562	8.95449	9.25747	0.000595076	0.00535813	0.636253	-0.652327	-1.5717	7.19949	11.3155	-1.94532	-1.26984
ETFBKMT	12	31647160	31673115	25955	+	25.2491	5.73507	4.06879	4.20818	0.00205792	0.0128601	0.638372	-0.64753	-1.56648	3.27933	5.13702	-2.02237	-1.21336
ETS1	11	128458761	128587559	128798	-	60.2873	12.6592	9.82849	10.0479	5.43434e-05	0.00108182	0.661647	-0.595866	-1.51138	8.00188	12.0939	-1.75182	-1.30394
ETV1	7	13891229	13991426	100197	-	222.208	47.2831	36.1704	37.0347	9.45229e-06	0.00034532	1.51646	0.600706	1.51646	44.6354	29.4339	1.34084	1.71508
FAIM2	12	49866896	49904218	37322	-	42.7789	9.28009	6.96349	7.12982	0.000220574	0.00274386	0.658403	-0.602956	-1.51883	5.66122	8.59841	-1.80886	-1.27529
FAM102B	1	108560089	108644901	84812	+	320.171	68.8003	52.0618	53.3619	1.42009e-06	9.53756e-05	0.648153	-0.625593	-1.54284	41.9702	64.7536	-1.71648	-1.38677
FAM114A1	4	38867677	38945740	78063	+	10.8755	3.02618	1.57228	1.81258	3.50974e-05	0.000810287	0.355976	-1.49015	-2.80918	0.951692	2.67347	-4.0121	-1.96692
FAM131A	3	184335926	184348422	12496	+	10.4488	2.67189	1.60364	1.74146	0.0056875	0.0261049	1.88378	0.913627	1.88378	2.27516	1.20776	1.22022	2.90818
FAM131B	7	143353400	143362771	9371	-	60.0131	13.7608	9.66593	10.0022	4.32188e-05	0.000935162	0.607965	-0.717939	-1.64483	7.56357	12.4408	-1.95731	-1.38224
FAM160A1	4	151409176	151670504	261328	+	12.8196	3.42838	1.9236	2.13661	5.53624e-05	0.00109555	0.412535	-1.27741	-2.42404	1.248	3.02521	-3.33249	-1.76324
FAM174A	5	100535374	100586742	51368	+	16.4462	3.85692	2.65054	2.74104	0.00625781	0.0277944	0.646081	-0.630212	-1.54779	2.1517	3.33038	-2.07078	-1.15689
FAM210B	20	56358974	56368664	9690	+	126.984	26.4279	20.5629	21.1639	2.44719e-06	0.000138906	0.623598	-0.681312	-1.6036	16.2574	26.0704	-1.81449	-1.41721
FAM225A	9	113113042	113119929	6887	+	36.3217	8.08053	5.78185	6.05361	2.71201e-05	0.000693545	0.554997	-0.849448	-1.80181	4.32121	7.78601	-2.19309	-1.48034
FAM81A	15	59372693	59523556	150863	+	32.6644	7.57089	5.25582	5.44407	0.000399346	0.00407907	0.613647	-0.704518	-1.6296	4.14061	6.74754	-2.03218	-1.30677
FAS	10	88990531	89017060	26529	+	8.00062	2.05387	1.1822	1.33344	0.000499756	0.0047505	0.409414	-1.28837	-2.44251	0.774688	1.89218	-3.76356	-1.58517
FBXL21P	5	135930317	135951592	21275	+	11.8538	3.17749	1.68836	1.97564	3.56635e-05	0.000817679	0.34297	-1.54385	-2.91571	1.00908	2.9422	-4.24469	-2.00282
FBXL4	6	98868535	98948007	79472	-	221.184	45.7582	36.0063	36.8641	4.48819e-06	0.000208685	0.656956	-0.606132	-1.52217	29.232	44.4961	-1.71082	-1.35433
FBXO36	2	229922302	230013120	90818	+	10.3908	2.4714	1.60492	1.7318	0.00762786	0.0318928	0.557604	-0.842686	-1.79339	1.23993	2.22367	-2.78142	-1.15633
FBXO4	5	41925254	41941744	16490	+	18.842	4.03488	3.05363	3.14034	0.00204961	0.0128225	0.64576	-0.63093	-1.54856	2.4644	3.81628	-1.98197	-1.20993
FBXO9	6	53051991	53100874	48883	+	242.867	53.2087	39.4924	40.4778	2.39874e-06	0.000138689	0.6489	-0.623931	-1.54107	31.8589	49.0967	-1.72401	-1.37754
FGF11	17	7438273	7444938	6665	+	22.0728	5.1881	3.4669	3.6788	1.83079e-05	0.000545375	0.503411	-0.990193	-1.98645	2.46366	4.89393	-2.46975	-1.59773
FGFBP3	10	91906584	91909487	2903	-	30.258	6.96009	4.90193	5.043	0.00246435	0.0146038	0.663751	-0.591287	-1.50659	4.0238	6.06221	-1.90732	-1.19005
FKBP1B	2	24049701	24063682	13981	+	32.3999	7.81748	5.22298	5.39998	0.00128463	0.0092402	0.632452	-0.660972	-1.58115	4.18417	6.61579	-1.99568	-1.25272
FKBP5	6	35573585	35728584	154999	-	1492.63	311.981	242.041	248.772	5.85253e-09	2.01482e-06	0.625081	-0.677885	-1.59979	191.379	306.166	-1.71636	-1.49114
FLNC	7	128830377	128859275	28898	+	185.971	43.86	29.9432	30.9951	8.21494e-05	0.00138107	1.60584	0.683332	1.60584	38.2013	23.7889	1.34728	1.91403
FLRT3	20	14322985	14337615	14630	-	107.428	22.8596	17.4917	17.9046	3.64711e-05	0.000829048	0.662309	-0.594424	-1.50987	14.2673	21.5418	-1.73886	-1.31104
FNBP1	9	129887187	130043195	156008	-	146.156	31.3705	23.7175	24.3593	1.13352e-06	7.89192e-05	0.631745	-0.662587	-1.58292	18.8619	29.8568	-1.76882	-1.41655
FNDC4	2	27491883	27495201	3318	-	30.7464	7.36356	4.86136	5.12441	4.21409e-05	0.00091567	0.534079	-0.904876	-1.87238	3.56805	6.68076	-2.32255	-1.50947
FO393411.1	6	39958414	39958834	420	-	24.6815	5.74494	3.88411	4.11358	0.000123426	0.00183104	0.529761	-0.916587	-1.88764	2.84909	5.37807	-2.43186	-1.46522
FOXN4	12	109277978	109309285	31307	-	7.94975	2.5237	1.04305	1.32496	3.17229e-06	0.000162877	0.243446	-2.03833	-4.10769	0.518809	2.13111	-5.98649	-2.81853
FOXO1	13	40555667	40666642	110975	-	12.0662	2.72358	1.95276	2.01103	0.00688056	0.0296589	0.64659	-0.629077	-1.54658	1.5794	2.44266	-2.07685	-1.15169
FRRS1	1	99703970	99766636	62666	-	33.8629	7.50083	5.47041	5.64382	7.56664e-05	0.00132571	0.611154	-0.710391	-1.63625	4.2817	7.00593	-1.96347	-1.36356
FRRS1L	9	109130293	109167296	37003	-	277.954	58.7559	45.1678	46.3257	3.99116e-06	0.000192998	0.648509	-0.624803	-1.542	36.4483	56.2032	-1.73666	-1.36916
FSIP1	15	39588357	39782842	194485	-	10.0921	2.50034	1.60486	1.68201	0.00680768	0.0294402	0.58871	-0.764372	-1.69863	1.24657	2.11745	-2.40544	-1.19951
FTL	19	48965309	48966880	1571	+	956.136	217.191	154.833	159.356	1.84518e-05	0.000546485	1.55727	0.639021	1.55727	194.082	124.63	1.35429	1.79068
GABRB2	5	161288429	161549045	260616	-	31.3471	7.42804	5.03032	5.22452	0.000220203	0.00274181	0.595609	-0.747561	-1.67895	3.90042	6.54862	-2.08296	-1.35331
GABRG3	15	26971181	27541985	570804	+	7.09117	1.65205	1.12013	1.18186	0.00308765	0.0171224	0.541767	-0.884255	-1.84581	0.830598	1.53313	-2.65888	-1.28138
GALNT12	9	98807670	98850082	42412	+	18.9379	4.53326	3.04347	3.15632	0.000712833	0.00608815	0.599577	-0.737983	-1.66784	2.3662	3.94644	-2.13055	-1.30562
GALNT4	12	89519412	89524797	5385	-	25.9148	5.53833	4.16469	4.31914	0.000333035	0.00363009	0.602393	-0.731224	-1.66005	3.24742	5.39086	-2.08141	-1.32399
GALNT6	12	51351247	51392868	41621	-	10.3936	2.87488	1.47629	1.73227	8.03928e-06	0.00031168	0.322805	-1.63126	-3.09784	0.845452	2.61908	-4.32691	-2.21789
GAS2	11	22625509	22813056	187547	+	56.0392	12.5227	9.0107	9.33987	6.02867e-05	0.00116604	1.65814	0.729566	1.65814	11.6524	7.02737	1.38008	1.99223
GAS5	1	173858559	173868883	10324	-	738.177	172.254	116.278	123.03	4.98535e-10	4.73537e-07	0.508742	-0.974994	-1.96563	82.9701	163.089	-2.13255	-1.81179
GCA	2	162318840	162371596	52756	+	27.9977	6.4938	4.47597	4.66628	0.000247164	0.00295043	0.584327	-0.775151	-1.71137	3.44201	5.89055	-2.15509	-1.35901
GCHFR	15	40764068	40767709	3641	+	10.3484	2.92202	1.55021	1.72473	0.000154809	0.00212752	0.413409	-1.27436	-2.41891	1.00894	2.44053	-3.43244	-1.70466
GCNT1	9	76419850	76651204	231354	+	10.5059	2.81288	1.66445	1.75099	0.00557827	0.0257454	0.574744	-0.799008	-1.7399	1.27814	2.22384	-2.45767	-1.23176
GCOM1	15	57591908	57714746	122838	+	10.1305	2.54948	1.54939	1.68842	0.000179872	0.00235427	0.448084	-1.15816	-2.23172	1.0449	2.33193	-3.09602	-1.60871
GGH	8	63015079	63038807	23728	-	150.915	44.3794	18.5208	25.1524	4.80729e-12	2.58089e-08	0.193854	-2.36696	-5.15851	8.16834	42.1365	-5.89264	-4.51585
GJA1	6	121435595	121449728	14133	+	12.7742	2.71416	2.0371	2.12903	0.0107789	0.0411891	0.634766	-0.655703	-1.57538	1.65337	2.60469	-2.24303	-1.10646
GLB1	3	32996609	33097203	100594	-	142.015	33.1861	22.9234	23.6692	4.59189e-05	0.000969254	0.627478	-0.672363	-1.59368	18.2515	29.087	-1.87708	-1.35307
GLB1L2	11	134331874	134378342	46468	+	20.384	5.23775	3.20947	3.39734	0.000411465	0.0041416	0.538652	-0.892575	-1.85649	2.37868	4.416	-2.44789	-1.40797
GLO1	6	38675925	38703146	27221	-	3065.38	735.247	470.943	510.897	9.1187e-11	1.44622e-07	0.443183	-1.17403	-2.2564	313.78	708.014	-2.45602	-2.07301
GM2A	5	151212150	151270441	58291	+	83.1137	18.0557	13.3795	13.8523	7.60696e-06	0.000301064	0.599271	-0.738719	-1.66869	10.3813	17.3232	-1.93852	-1.43643
GOLGA6L4	15	84235773	84245369	9596	+	9.20352	2.218	1.37282	1.53392	0.00172643	0.011315	0.464051	-1.10764	-2.15493	0.972395	2.09545	-3.40686	-1.36306
GORASP1	3	39096659	39108364	11705	-	62.5193	13.9201	9.95559	10.4199	2.05208e-06	0.000125753	0.549921	-0.862704	-1.81844	7.39407	13.4457	-2.12053	-1.55939
GPR155	2	174431571	174487095	55524	-	80.0267	17.2368	12.9893	13.3378	1.28236e-05	0.000426822	0.636535	-0.651689	-1.57101	10.3755	16.3	-1.80501	-1.36734
GPX3	5	151020438	151028993	8555	+	13.9734	3.304	2.2217	2.3289	0.00080145	0.00660781	0.560938	-0.834087	-1.78273	1.67382	2.98398	-2.36723	-1.34255
GPX8	5	55160167	55167298	7131	+	22.5108	5.17918	3.51346	3.7518	6.45736e-05	0.00121457	0.501722	-0.995039	-1.99313	2.50694	4.99666	-2.57336	-1.54373
GRAMD4	22	46576012	46679791	103779	+	29.6867	6.47574	4.82079	4.94778	0.000578572	0.00528061	0.647757	-0.626476	-1.54379	3.89008	6.00547	-1.89025	-1.26083
GRHL1	2	9951693	10002278	50585	+	9.74354	2.23246	1.51572	1.62392	0.00115359	0.0086134	0.510907	-0.968867	-1.9573	1.09825	2.1496	-2.80071	-1.36788
GRTP1	13	113324163	113364149	39986	-	7.20434	1.85709	1.13053	1.20072	0.0130419	0.0471536	0.573023	-0.803336	-1.74513	0.874803	1.52665	-2.66096	-1.1445
GSG1L	16	27787528	28063715	276187	-	28.4027	7.23295	4.17162	4.73378	1.76305e-07	2.15092e-05	0.361268	-1.46886	-2.76803	2.51261	6.95496	-3.40625	-2.24939
GSTO2	10	104268873	104304951	36078	+	21.998	5.74966	3.20526	3.66634	3.05288e-06	0.000158136	0.361211	-1.46909	-2.76846	1.9458	5.38688	-3.64713	-2.10149
H19	11	1995176	2001471	6295	-	31.4897	7.90419	4.83261	5.24829	1.90582e-05	0.000560784	0.46192	-1.11429	-2.16488	3.31658	7.17999	-2.7826	-1.68429
H2AC6	6	26124145	26139117	14972	+	17.0035	4.10799	2.70624	2.83391	0.00080055	0.00660781	1.75884	0.814627	1.75884	3.6134	2.05442	1.33958	2.30932
H2AW	1	228456979	228457874	895	-	9.61661	2.49952	1.47318	1.60277	0.000281186	0.00323436	2.19631	1.13508	2.19631	2.20265	1.00289	1.56317	3.0859
H2BC21	1	149884459	149886653	2194	-	16.8274	3.74923	2.6909	2.80457	0.000408062	0.00413219	1.74116	0.800051	1.74116	3.56288	2.04626	1.35446	2.23826
H2BC5	6	26158146	26171350	13204	+	8.31962	2.71499	1.21559	1.3866	0.000171705	0.00228826	2.6668	1.41511	2.6668	2.01691	0.756303	1.80862	3.93216
HAS3	16	69105653	69118720	13067	+	7.48301	1.96705	1.18723	1.24717	0.00568898	0.0261049	0.565558	-0.822252	-1.76816	0.90108	1.59326	-2.54594	-1.228
HCN3	1	155277463	155289849	12386	+	29.8315	6.96009	4.79521	4.97191	0.00164948	0.0109674	0.628948	-0.668988	-1.58996	3.83938	6.10445	-2.04317	-1.23728
HCN4	15	73319859	73368959	49100	-	50.387	10.8632	8.18604	8.39783	0.000514056	0.00484473	1.50769	0.592342	1.50769	10.098	6.69766	1.24507	1.82571
HEY1	8	79762371	79767858	5487	-	16.7799	3.76169	2.71541	2.79666	0.00365323	0.0191943	0.647201	-0.627715	-1.54512	2.19767	3.39565	-2.0167	-1.1838
HNMT	2	137964020	138016365	52345	+	39.1285	9.50996	6.20286	6.52142	2.69318e-05	0.000690707	0.543585	-0.879422	-1.83964	4.59313	8.4497	-2.24984	-1.50422
HOOK1	1	59814786	59876323	61537	+	99.6326	23.9504	15.816	16.6054	2.20932e-05	0.000609534	0.558712	-0.839823	-1.78983	11.9043	21.3066	-2.16491	-1.47973
HPS6	10	102065349	102068037	2688	+	16.6745	3.85692	2.66079	2.77909	0.00331535	0.017929	0.610171	-0.712714	-1.63888	2.10626	3.45192	-2.226	-1.20662
HS3ST4	16	25691959	26137686	445727	+	28.9981	6.55661	4.624	4.83302	2.8603e-05	0.000717666	0.554924	-0.849637	-1.80205	3.44964	6.21641	-2.19179	-1.48161
HSD17B6	12	56752161	56787791	35630	+	7.80604	1.95234	1.20933	1.30101	0.00319958	0.0175023	0.510453	-0.970151	-1.95905	0.879342	1.72267	-2.92161	-1.31361
HSPA2	14	64535905	64546174	10269	+	13.0763	3.1903	2.05082	2.17939	9.69581e-05	0.00156474	0.498418	-1.00457	-2.00635	1.44986	2.90892	-2.61325	-1.54039
HTR3A	11	113974881	113990314	15433	+	51.2883	12.0943	8.04836	8.54805	2.44135e-06	0.000138906	0.505123	-0.985294	-1.97972	5.73749	11.3586	-2.36517	-1.65708
HYKK	15	78507564	78537373	29809	+	21.2355	4.85683	3.40155	3.53925	0.000205882	0.00261492	0.578463	-0.789703	-1.72872	2.59407	4.48442	-2.16988	-1.37725
IFT88	13	20567069	20691438	124369	+	58.7709	13.93	9.47164	9.79515	0.000129735	0.00190421	0.619062	-0.691843	-1.61535	7.49052	12.0998	-1.9497	-1.33833
IKZF2	2	212999691	213152428	152737	-	18.8493	4.46482	3.05144	3.14154	0.00353328	0.0187327	0.650416	-0.620565	-1.53748	2.47612	3.80697	-1.98954	-1.18813
IL12RB2	1	67307364	67397091	89727	+	19.7587	4.18618	3.20636	3.29312	0.000841816	0.00685935	0.636964	-0.650716	-1.56995	2.56279	4.02345	-1.96273	-1.25577
IL13RA1	X	118727133	118794536	67403	+	38.9768	9.28503	6.04448	6.49613	5.75648e-06	0.000247733	0.47778	-1.06558	-2.09301	4.20052	8.79174	-2.58663	-1.69359
IMPDH2	3	49024325	49029409	5084	-	961.569	214.171	155.831	160.262	2.32436e-06	0.000134975	1.57113	0.651805	1.57113	195.861	124.662	1.39754	1.76629
INAVA	1	200891048	200915743	24695	+	8.12257	2.42097	1.15875	1.35376	0.00181411	0.011688	0.404248	-1.30669	-2.47373	0.779429	1.9281	-4.24386	-1.44193
INHBA	7	41667168	41705835	38667	-	10.2953	2.72358	1.47625	1.71589	0.000369135	0.00388351	0.379913	-1.39626	-2.63218	0.944827	2.48695	-4.16283	-1.66434
INPPL1	11	72223701	72239148	15447	+	44.2267	9.48183	7.15622	7.37112	0.000176936	0.00232499	0.632629	-0.660568	-1.58071	5.71249	9.02976	-1.90956	-1.30849
INSRR	1	156840063	156859118	19055	-	7.83865	2.19039	1.23162	1.30644	0.00745326	0.0314147	0.556133	-0.846497	-1.79813	0.933797	1.67909	-2.6575	-1.21666
INTS14	15	65578753	65611290	32537	-	397.92	81.0794	64.8587	66.3199	1.57535e-07	2.03389e-05	0.656095	-0.608023	-1.52417	52.5479	80.0919	-1.65915	-1.40017
IQCH	15	67254786	67502261	247475	+	26.0656	7.21227	3.62677	4.34427	7.26681e-08	1.17846e-05	0.293969	-1.76626	-3.40172	1.9739	6.71465	-4.28336	-2.70154
ITGA6	2	172427354	172506460	79106	+	8.46529	1.87528	1.34835	1.41088	0.0120573	0.0447123	0.612083	-0.7082	-1.63376	1.07138	1.75038	-2.39392	-1.11499
ITPR3	6	33620365	33696575	76210	+	21.7101	4.58429	3.51922	3.61836	0.000596189	0.00536046	0.631917	-0.662194	-1.58249	2.80223	4.43449	-1.96673	-1.27332
ITSN2	2	24202864	24360715	157851	-	83.3244	18.2366	13.5501	13.8874	4.70774e-05	0.000982209	0.654323	-0.611926	-1.5283	10.9856	16.7892	-1.77407	-1.31658
JDP2	14	75427716	75474112	46396	+	16.448	3.52723	2.66698	2.74134	0.00538018	0.0250576	0.662251	-0.59455	-1.51	2.18433	3.29834	-1.9811	-1.15093
KAT2B	3	20040446	20154405	113959	+	12.6079	2.95223	2.02642	2.10131	0.0115897	0.043463	0.646774	-0.628666	-1.54613	1.65059	2.55203	-2.14588	-1.11401
KCNG3	2	42442017	42493983	51966	-	19.5011	4.33088	3.15885	3.25018	0.00136936	0.00967059	0.637147	-0.650302	-1.5695	2.52982	3.97054	-1.98977	-1.23799
KCNJ8	12	21764955	21775601	10646	-	123.993	32.9311	18.3139	20.6656	7.12723e-09	2.06039e-06	0.371867	-1.42714	-2.68913	11.2035	30.1276	-3.12515	-2.31395
KCNK10	14	88180103	88326908	146805	-	17.765	4.6401	2.72278	2.96084	8.4241e-05	0.00141003	0.46223	-1.11332	-2.16343	1.87192	4.04976	-2.90191	-1.61287
KCNK6	19	38319845	38332077	12232	+	7.24917	1.76532	1.14263	1.2082	0.00548844	0.0254216	0.555153	-0.849041	-1.8013	0.862595	1.5538	-2.65473	-1.22223
KCNK9	8	139600838	139704110	103272	-	12.7743	2.72358	2.07065	2.12906	0.0037659	0.0195215	0.639987	-0.643885	-1.56253	1.66168	2.59643	-2.05534	-1.18788
KCNS3	2	17877847	18361617	483770	+	23.8529	5.64878	3.7119	3.97548	5.50139e-06	0.000239861	0.475957	-1.0711	-2.10103	2.56397	5.38698	-2.59103	-1.7037
KCTD11	17	7351889	7354945	3056	+	8.13145	2.26966	1.19237	1.35524	0.000121102	0.0018165	0.37801	-1.40351	-2.64544	0.743528	1.96695	-3.88569	-1.80105
KDM4D	11	94973709	94999520	25811	+	14.0481	3.53053	2.2254	2.34134	0.00404468	0.0204758	0.58535	-0.772628	-1.70838	1.72896	2.95372	-2.38486	-1.22379
KIAA0895	7	36324221	36390126	65905	-	182.268	38.8064	29.7128	30.3779	2.61895e-06	0.000145112	0.660589	-0.598176	-1.5138	24.1689	36.587	-1.68748	-1.358
KIAA1324	1	109113679	109206782	93103	+	7.48224	1.81575	1.15618	1.24704	0.000533766	0.00496018	0.470053	-1.0891	-2.12742	0.797488	1.69659	-3.03569	-1.4909
KIAA1671	22	24952730	25197449	244719	+	12.0574	2.90462	1.88464	2.00957	0.00492342	0.023551	0.559988	-0.836533	-1.78575	1.44275	2.5764	-2.6024	-1.22538
KIAA1841	2	61065871	61138035	72164	+	133.263	27.4538	21.7191	22.2104	2.20576e-06	0.000130947	0.655522	-0.609283	-1.5255	17.5889	26.8319	-1.70105	-1.36807
KIF16B	20	16272104	16573435	301331	-	58.17	12.8085	9.43874	9.69501	3.98268e-05	0.000881225	0.636676	-0.651369	-1.57066	7.54282	11.8472	-1.83564	-1.34393
KLHL15	X	23983720	24027187	43467	-	359.206	75.0413	58.5648	59.8677	2.69542e-06	0.000148207	0.665968	-0.586475	-1.50157	47.864	71.8713	-1.67156	-1.34887
KRBA2	17	8356902	8376705	19803	-	27.5649	6.36048	4.24714	4.59414	7.89368e-05	0.00135097	2.08037	1.05684	2.08037	6.20544	2.98285	1.56937	2.75777
L3MBTL1	20	43489442	43550951	61509	+	6.80369	1.66444	1.05653	1.13395	0.000724326	0.00615469	0.478311	-1.06398	-2.09069	0.733783	1.53411	-2.99258	-1.46061
LAGE3	X	154477769	154479258	1489	-	15.6317	4.29056	2.50018	2.60529	0.011022	0.0418775	1.58746	0.666722	1.58746	3.1968	2.01378	1.15601	2.17994
LAMTOR3	4	99878336	99894429	16093	-	384.955	105.086	54.2198	64.1591	3.04409e-11	5.78289e-08	0.305251	-1.71193	-3.276	30.009	98.3092	-3.66554	-2.92785
LATS2	13	20973036	21061587	88551	-	37.9039	8.76126	6.05321	6.31732	2.75488e-05	0.000700465	0.565885	-0.821419	-1.76714	4.56595	8.06869	-2.13539	-1.4624
LBHD1	11	62662817	62672256	9439	-	11.3195	2.94137	1.73326	1.88658	0.0136101	0.0485611	0.569521	-0.812178	-1.75586	1.36914	2.40402	-2.82153	-1.09269
LEPR	1	65420652	65641560	220908	+	29.8549	7.38383	4.75426	4.97581	9.96586e-05	0.00159478	0.562702	-0.829558	-1.77714	3.5834	6.36821	-2.2112	-1.42829
LGALS3BP	17	78971238	78979948	8710	-	21.3283	5.14444	3.41586	3.55472	0.00148506	0.0102445	0.606943	-0.720367	-1.6476	2.68524	4.42421	-2.15117	-1.26191
LGI2	4	24998847	25030947	32100	-	15.7054	4.69053	1.9758	2.61757	4.06635e-06	0.000195405	0.231766	-2.10926	-4.3147	0.98503	4.25011	-6.55171	-2.84149
LHX8	1	75128434	75161534	33100	+	23.3507	5.22383	3.79624	3.89179	0.0019037	0.0121124	0.662484	-0.594043	-1.50947	3.10168	4.68189	-1.89421	-1.20288
LIG4	13	108207439	108218369	10930	-	113.911	24.7122	18.452	18.9852	7.11023e-06	0.000290036	0.6286	-0.669785	-1.59084	14.6556	23.3147	-1.81943	-1.39096
LINC00205	21	45288050	45297807	9757	+	82.1772	19.6651	13.0127	13.6962	9.20766e-07	6.84042e-05	0.531868	-0.910859	-1.88017	9.5107	17.8817	-2.18354	-1.61894
LINC00265	7	39733430	39793093	59663	+	31.5749	7.76705	5.1055	5.26248	0.00138151	0.00970485	0.645093	-0.63242	-1.55016	4.12717	6.39779	-1.94346	-1.23646
LINC00472	6	71343427	71420746	77319	-	10.5807	2.71416	1.64628	1.76344	0.00514656	0.0243468	0.545554	-0.874207	-1.833	1.24493	2.28196	-2.72551	-1.23276
LINC00963	9	129476946	129513688	36742	+	35.9599	8.14226	5.78038	5.99332	0.000214349	0.00268401	0.605842	-0.722987	-1.6506	4.52224	7.46439	-2.03785	-1.33693
LINC01234	12	113583886	113773727	189841	-	11.2771	2.90217	1.74333	1.87951	0.00067422	0.00585999	0.48757	-1.03632	-2.05099	1.23207	2.52696	-2.87969	-1.46076
LINC01550	14	97924637	97978125	53488	-	11.0362	2.72358	1.74206	1.83937	0.00302	0.0168315	0.561214	-0.833376	-1.78185	1.32241	2.35633	-2.5153	-1.26227
LINC01881	2	242088633	242160154	71521	+	7.18645	1.78599	1.13224	1.19774	0.00838117	0.0340939	0.555775	-0.847427	-1.79929	0.855747	1.53974	-2.66506	-1.21477
LINC02035	3	122886941	122892417	5476	+	26.7866	6.20607	4.24469	4.46443	2.92454e-05	0.000728287	0.534686	-0.903237	-1.87026	3.11082	5.81804	-2.30292	-1.51888
LINC02691	14	104223584	104288070	64486	+	16.9927	4.04738	2.73649	2.83212	0.00344701	0.0183942	0.628369	-0.670316	-1.59142	2.18577	3.47848	-2.0965	-1.20802
LITAF	16	11547722	11636382	88660	-	201.69	45.2724	31.7001	33.6149	2.71514e-09	1.33726e-06	0.501113	-0.996791	-1.99556	22.4432	44.7867	-2.19817	-1.81162
LONRF2	2	100271875	100322502	50627	-	16.4966	4.42018	2.47993	2.74944	4.71236e-05	0.000982209	0.420367	-1.25028	-2.37887	1.62743	3.87145	-3.24232	-1.74537
LOXL2	8	23296897	23425329	128432	-	12.0251	3.09508	1.84526	2.00418	0.00064552	0.00568485	0.481105	-1.05558	-2.07855	1.30203	2.70633	-2.97789	-1.45081
LOXL4	10	98247690	98268195	20505	-	39.8092	9.02792	6.43341	6.63486	0.000100497	0.0016005	0.619063	-0.691842	-1.61534	5.0738	8.19593	-1.93947	-1.34539
LPP	3	188153284	188890672	737388	+	242.439	52.4408	39.2484	40.4065	4.88546e-07	4.52656e-05	0.621314	-0.686606	-1.60949	30.9689	49.8442	-1.78998	-1.44721
LRP10	14	22871740	22881714	9974	+	17.3894	4.57114	2.58748	2.89823	5.08629e-05	0.00103263	0.408627	-1.29114	-2.44722	1.68149	4.11497	-3.39347	-1.76482
LRRC2	3	46515385	46580100	64715	-	12.9289	3.07662	2.01695	2.15482	0.000153523	0.0021222	0.492921	-1.02057	-2.02872	1.42293	2.88672	-2.70089	-1.52384
LRRC23	12	6873569	6914242	40673	+	9.64766	2.05387	1.55702	1.60794	0.00550695	0.0254895	0.621849	-0.685363	-1.60811	1.23304	1.98285	-2.19312	-1.17915
LRRC32	11	76657524	76670748	13224	-	6.7081	1.71488	1.00725	1.11802	0.0081921	0.0335815	0.490438	-1.02786	-2.03899	0.73578	1.50025	-3.41921	-1.21592
LRRC37A9P	17	35912635	35918011	5376	-	8.20194	2.18781	1.05689	1.36699	0.000494901	0.00472447	0.292036	-1.77578	-3.42424	0.617955	2.11603	-6.48884	-1.80701
LRRC75A	17	16441577	16492194	50617	-	14.3254	3.54541	2.24727	2.38756	0.000796558	0.00659824	0.533584	-0.906212	-1.87412	1.66142	3.1137	-2.56613	-1.36872
LRRCC1	8	85107215	85146081	38866	+	23.7352	5.52344	3.72685	3.95586	0.000634955	0.00561785	0.546416	-0.871929	-1.83011	2.79555	5.11617	-2.46822	-1.35697
LRRFIP1P1	3	179259028	179261274	2246	-	6.6609	1.45187	1.05678	1.11015	0.00584621	0.0265321	0.56602	-0.821075	-1.76672	0.802502	1.4178	-2.58939	-1.20542
LRRIQ1	12	85036314	85264458	228144	+	14.9201	3.38077	2.40151	2.48669	0.00107563	0.00819695	0.601039	-0.734469	-1.66379	1.86704	3.10635	-2.15284	-1.28583
LRRK1	15	100919327	101078258	158931	+	75.7045	15.8498	12.3159	12.6174	0.000103386	0.00163475	0.661276	-0.596676	-1.51223	10.0448	15.19	-1.77531	-1.28813
LRRK2	12	40196744	40369286	172542	+	7.76297	2.41105	1.12298	1.29383	0.000336398	0.00365775	0.37542	-1.41342	-2.66368	0.7063	1.88136	-4.1251	-1.72001
LTBP1	2	32946953	33399510	452557	+	37.9012	8.87662	6.0318	6.31687	9.8155e-06	0.000355658	0.547805	-0.868264	-1.82547	4.47138	8.16236	-2.18438	-1.52552
LTBP2	14	74498183	74612379	114196	-	7.29473	1.81575	1.1684	1.21579	0.0073302	0.0310041	0.59038	-0.760284	-1.69382	0.902649	1.52893	-2.40447	-1.19321
LY6G5B	6	31670167	31673777	3610	+	23.2886	5.50528	3.73141	3.88143	0.00177855	0.0115203	0.614688	-0.702074	-1.62684	2.95521	4.80765	-2.12945	-1.24286
LY86-AS1	6	6346465	6622772	276307	-	12.9879	3.37923	1.85804	2.16466	2.04406e-06	0.000125753	0.32663	-1.61427	-3.06157	1.06592	3.26339	-4.08344	-2.29542
LYN	8	55879835	56014170	134335	+	137.387	30.2356	22.0204	22.8979	2.96123e-07	3.22775e-05	0.573547	-0.802017	-1.74354	16.6923	29.1036	-1.96261	-1.54892
MAB21L2	4	150582151	150584694	2543	+	878.632	194.136	141.953	146.439	2.11407e-08	4.84705e-06	1.64342	0.716703	1.64342	182.083	110.795	1.51225	1.78597
MAGEE1	X	76427710	76431343	3633	+	43.3549	9.10814	7.02118	7.22582	2.37222e-05	0.000639873	0.618447	-0.693278	-1.61695	5.52232	8.92933	-1.89216	-1.38177
MANSC1	12	12326056	12350243	24187	-	87.7274	19.3671	14.1907	14.6212	2.53112e-05	0.000662574	0.626504	-0.674604	-1.59616	11.2637	17.9787	-1.86105	-1.36897
MAP3K21	1	233327724	233385149	57425	+	16.0101	4.13574	2.42845	2.66835	2.07395e-05	0.000588847	0.426628	-1.22895	-2.34396	1.59592	3.74078	-3.09047	-1.77777
MAP3K7CL	21	29077471	29175890	98419	+	6.89185	1.6074	1.09609	1.14864	0.002761	0.015727	0.550331	-0.861629	-1.81709	0.815481	1.4818	-2.57149	-1.28401
MAP3K9	14	70722526	70809535	87009	-	79.0111	17.5514	12.8333	13.1685	2.45266e-05	0.00064971	0.643175	-0.636716	-1.55479	10.3089	16.0281	-1.79619	-1.34583
MARCHF4	2	216257865	216372484	114619	-	28.824	6.57097	4.53291	4.804	2.13287e-05	0.000597812	0.515039	-0.957247	-1.9416	3.26625	6.34175	-2.41216	-1.56284
MBNL1-AS1	3	152245262	152269558	24296	-	12.7075	3.39708	2.00187	2.11791	0.000853033	0.00692107	0.534577	-0.90353	-1.87064	1.47557	2.76025	-2.5346	-1.3806
MBOAT1	6	20099684	20212470	112786	-	25.3702	6.80879	3.87656	4.22836	2.36536e-05	0.000639783	0.449261	-1.15438	-2.22588	2.62153	5.8352	-2.88678	-1.71628
MCRIP1	17	81822361	81833303	10942	-	42.4041	10.2994	6.7344	7.06735	0.000338483	0.00366923	1.74885	0.806409	1.74885	8.99267	5.14204	1.37648	2.22196
MCUB	4	109560209	109688720	128511	+	12.2027	2.76823	1.96245	2.03379	0.00482616	0.0232277	0.616795	-0.697138	-1.62129	1.55175	2.51583	-2.18931	-1.20064
MDGA1	6	37630679	37699307	68628	-	14.5121	3.8093	2.1796	2.41869	1.00131e-05	0.000359877	0.402545	-1.31278	-2.48419	1.38838	3.449	-3.26454	-1.89038
MEST	7	130486171	130506466	20295	+	66.6994	14.78	10.7498	11.1166	6.95353e-06	0.000285395	0.599723	-0.737631	-1.66744	8.33502	13.8981	-1.93168	-1.43934
METTL15	11	28108248	28527042	418794	+	128.871	28.665	20.7586	21.4785	9.08656e-06	0.000335647	0.6067	-0.720946	-1.64826	16.2208	26.7362	-1.91052	-1.422
METTL15P1	3	156713884	156714929	1045	-	9.8578	2.3539	1.58274	1.64297	0.00524712	0.0246734	0.606598	-0.721188	-1.64854	1.24066	2.04527	-2.26839	-1.19807
METTL7A	12	50923472	50932511	9039	+	115.291	26.2527	18.4913	19.2152	6.11647e-06	0.000259843	0.587015	-0.768531	-1.70353	14.2148	24.2155	-1.98273	-1.46365
MFGE8	15	88898683	88913382	14699	-	12.5863	2.85752	2.01534	2.09772	0.00115447	0.00861511	0.581929	-0.781086	-1.71842	1.54333	2.6521	-2.27444	-1.29833
MFSD11	17	76735865	76781450	45585	+	71.8362	15.1812	11.6117	11.9727	3.01636e-06	0.00015792	0.609017	-0.715446	-1.64199	9.06339	14.882	-1.87327	-1.43927
MFSD6	2	190408355	190509206	100851	+	55.5203	11.5191	9.04098	9.25338	7.03024e-05	0.00127571	0.656534	-0.607059	-1.52315	7.33478	11.172	-1.77905	-1.30406
MGAT4A	2	98619106	98731133	112027	-	8.60382	2.4557	1.30405	1.43397	0.000436042	0.00434018	0.440112	-1.18406	-2.27215	0.876469	1.99147	-3.29103	-1.56871
MGLL	3	127689062	128052191	363129	-	11.7333	2.71415	1.84802	1.95555	0.00290356	0.0163194	0.562915	-0.82901	-1.77647	1.40866	2.50244	-2.52599	-1.24934
MGST1	12	16347142	16609260	262118	+	39.3548	8.30448	6.39889	6.55913	0.00045361	0.00444015	0.659877	-0.59973	-1.51543	5.21511	7.90315	-1.83422	-1.25205
MIATNB	22	26672747	26780894	108147	+	8.2946	2.0759	1.33263	1.38243	0.00865301	0.0349963	0.609859	-0.713452	-1.63972	1.04741	1.71746	-2.29964	-1.16918
MICAL2	11	12094008	12359145	265137	+	15.29	3.67134	2.41746	2.54833	0.00029072	0.00329582	0.535071	-0.902197	-1.86891	1.77651	3.32014	-2.44441	-1.4289
MID1	X	10445310	10833655	388345	-	19.0222	4.28705	3.02984	3.17036	9.48398e-05	0.00153839	0.549997	-0.862503	-1.81819	2.24993	4.0908	-2.28135	-1.44906
MIF	22	23894383	23895228	845	+	35.7513	9.4303	5.62354	5.95854	0.00175589	0.0114273	1.76982	0.8236	1.76982	7.61461	4.30248	1.31591	2.3803
MINDY2	15	58771192	58861901	90709	+	478.07	109.609	76.6347	79.6783	1.4863e-05	0.000470592	0.597806	-0.742252	-1.67278	59.6219	99.7346	-1.96779	-1.42201
MIR924HG	18	39206917	39800323	593406	-	23.3727	5.04729	3.79325	3.89545	0.000381081	0.00398085	0.632922	-0.659901	-1.57997	3.01976	4.77115	-1.93688	-1.28883
MLYCD	16	83899115	83951446	52331	+	15.8891	3.6314	2.56639	2.64819	0.000949668	0.00745495	0.612801	-0.70651	-1.63185	2.01241	3.28396	-2.08312	-1.27834
MMP2	16	55389700	55506692	116992	+	163.392	42.4901	24.9588	27.232	1.06633e-07	1.55824e-05	2.279	1.1884	2.279	37.8541	16.61	1.94418	2.67148
MOB3B	9	27325209	27529815	204606	-	14.8054	3.75047	2.38127	2.46756	0.0106739	0.0409291	0.647522	-0.626999	-1.54435	1.93964	2.99549	-2.10336	-1.13391
MORC4	X	106813871	107000213	186342	-	66.051	14.0714	10.7286	11.0085	2.72019e-05	0.0006943	0.640889	-0.641854	-1.56033	8.59927	13.4177	-1.80772	-1.3468
MOV10	1	112673141	112700747	27606	+	18.2686	4.19694	2.91269	3.04477	0.000856723	0.00693852	0.580038	-0.785779	-1.72402	2.2355	3.85405	-2.26419	-1.31273
MPP3	17	43800799	43833171	32372	-	66.7484	14.1533	10.8876	11.1247	4.64977e-05	0.000975279	0.665237	-0.588059	-1.50322	8.88833	13.3611	-1.73443	-1.30284
MPPE1	18	11882622	11908367	25745	-	17.6131	4.09756	2.82642	2.93551	0.00105428	0.00806202	0.599584	-0.737966	-1.66782	2.20068	3.67034	-2.16376	-1.28556
MPPED1	22	43411196	43507849	96653	+	12.4387	2.80938	1.96462	2.07311	0.000228074	0.00280811	0.522995	-0.93513	-1.91206	1.42381	2.72241	-2.51361	-1.45448
MROH8	20	37101226	37179589	78363	-	11.846	2.72357	1.88025	1.97434	0.00375426	0.0194919	0.585639	-0.771915	-1.70754	1.4584	2.49028	-2.39615	-1.21682
MRPL53	2	74471982	74472688	706	-	20.5596	5.39055	3.24189	3.4266	0.0121876	0.0449322	1.63111	0.705855	1.63111	4.24852	2.60468	1.13698	2.34
MRPL54	19	3762682	3768576	5894	+	32.04	7.89638	5.07104	5.34	0.000829036	0.0067885	1.74226	0.800963	1.74226	6.7854	3.89459	1.3244	2.29197
MRPS31P5	13	52167709	52194466	26757	-	56.3983	11.9411	9.14135	9.39972	3.82004e-05	0.00085233	0.631309	-0.663582	-1.58401	7.2753	11.5241	-1.85705	-1.35111
MTHFS	15	79833585	79897380	63795	-	38.9259	8.37365	6.26664	6.48766	0.00282525	0.0159941	0.653385	-0.613995	-1.53049	5.12759	7.84773	-1.9802	-1.18291
MTM1	X	150568621	150673144	104523	+	22.5626	4.99967	3.66604	3.76043	0.00329116	0.0178083	0.665362	-0.587789	-1.50294	3.00481	4.51605	-1.90559	-1.18537
MTMR7	8	17296794	17413529	116735	-	52.2563	11.9054	8.30035	8.70938	7.15439e-06	0.000290917	0.545537	-0.87425	-1.83306	6.1484	11.2704	-2.18394	-1.53855
MTND1P23	1	629062	629434	372	+	6.73753	1.84446	1.05773	1.12292	0.00633159	0.0279818	1.85555	0.891847	1.85555	1.45936	0.786484	1.25001	2.75442
MXRA5	X	3308565	3346653	38088	-	79.2542	17.8408	12.8722	13.209	3.91788e-05	0.000871236	1.54745	0.629897	1.54745	16.0477	10.3704	1.33195	1.79782
MYCL	1	39895426	39902257	6831	-	19.1904	4.18618	3.0658	3.1984	0.000299767	0.00336966	0.572744	-0.804038	-1.74598	2.32951	4.06728	-2.23045	-1.36674
MYLK	3	123610049	123884332	274283	-	44.9944	10.7272	7.12042	7.49906	4.43488e-06	0.000206977	0.52955	-0.917161	-1.8884	5.19254	9.80558	-2.2502	-1.58477
MYO6	6	75749192	75919538	170346	+	50.1159	12.8561	7.61155	8.35264	2.50347e-07	2.86993e-05	0.422652	-1.24246	-2.36601	4.96293	11.7424	-2.83232	-1.97648
MYORG	9	34366666	34376899	10233	-	20.3527	4.84183	3.25483	3.39211	0.000360729	0.00383145	0.578619	-0.789315	-1.72825	2.48666	4.29757	-2.20166	-1.35664
MYRF	11	61752642	61788519	35877	+	26.882	6.77357	4.30496	4.48033	0.000807989	0.00664069	0.602048	-0.732049	-1.661	3.36741	5.59325	-2.12482	-1.29842
NAIPP2	5	70094659	70128435	33776	-	9.64643	3.46875	1.37658	1.60774	0.00402625	0.0204277	0.417751	-1.25928	-2.39377	0.947465	2.26801	-4.08805	-1.40168
NBEAL1	2	203014879	203226379	211500	+	360.484	76.9967	58.4735	60.0806	2.40029e-05	0.000643969	0.650251	-0.620931	-1.53787	47.3473	72.8139	-1.77146	-1.33508
NBPF26	1	120723949	120842111	118162	+	14.4999	3.70179	2.2985	2.41665	0.000606385	0.0054228	0.549949	-0.86263	-1.81835	1.71494	3.11835	-2.40665	-1.37386
NBPF3	1	21440128	21485006	44878	+	12.2426	2.99147	1.91282	2.04044	0.000175906	0.00231603	0.494119	-1.01707	-2.0238	1.34958	2.7313	-2.69225	-1.52132
NBPF9	1	149054027	149103562	49535	-	12.7816	2.91086	2.04977	2.13027	0.0061548	0.0274561	0.620682	-0.688073	-1.61113	1.63168	2.62885	-2.20945	-1.17484
NDRG4	16	58462846	58513629	50783	+	194.353	44.0438	30.8041	32.3922	3.74203e-08	7.28405e-06	0.53126	-0.91251	-1.88232	22.4765	42.3079	-2.10523	-1.68301
NDUFA11	19	5891276	5904007	12731	-	39.8453	9.83738	6.37651	6.64088	0.00128437	0.0092402	1.63716	0.711193	1.63716	8.24536	5.03639	1.2786	2.09627
NDUFA13	19	19515736	19529055	13319	+	59.3548	14.6119	9.52825	9.89247	0.0045316	0.0221957	1.54057	0.623464	1.54057	11.9973	7.7876	1.18944	1.99535
NDUFB7	19	14566078	14572067	5989	-	8.22744	2.37355	1.25796	1.37124	0.000575273	0.00526134	2.19926	1.13702	2.19926	1.88526	0.857222	1.52929	3.16275
NDUFS8	11	68030617	68036645	6028	+	21.9253	5.55915	3.50536	3.65421	0.00816391	0.033497	1.57829	0.658358	1.57829	4.47382	2.8346	1.16365	2.14067
NEBL	10	20779973	21174188	394215	-	16.6184	3.70582	2.66682	2.76973	0.0010862	0.00824915	0.598157	-0.741404	-1.6718	2.0733	3.46615	-2.17446	-1.28534
NEDD9	6	11183298	11382349	199051	-	49.096	11.2372	7.7496	8.18266	1.20667e-05	0.000413565	0.530136	-0.915567	-1.88631	5.66998	10.6953	-2.29512	-1.55032
NEFM	8	24913758	24919099	5341	+	392.52	82.7199	63.8656	65.4199	1.88443e-06	0.000118764	1.52942	0.612987	1.52942	79.1127	51.7272	1.37255	1.70422
NEMP1	12	57055643	57088064	32421	-	1105.6	229.07	180.116	184.267	5.40804e-08	9.46264e-06	0.653673	-0.613359	-1.52982	145.676	222.858	-1.65334	-1.41552
NEMP2	2	190504338	190534723	30385	-	124.801	27.7707	20.1427	20.8002	1.11652e-06	7.81447e-05	0.605375	-0.724099	-1.65187	15.6872	25.9132	-1.86447	-1.46351
NFATC2IP	16	28950807	28967098	16291	+	93.3844	21.5358	14.8948	15.5641	5.62448e-07	4.95327e-05	0.554546	-0.850622	-1.80328	11.1042	20.0239	-2.05986	-1.57865
NFATC4	14	24365673	24379605	13932	+	15.0531	3.48258	2.41499	2.50885	0.00665834	0.0289639	0.634141	-0.657124	-1.57694	1.94716	3.07055	-2.15794	-1.15236
NHLRC3	13	39038306	39050110	11804	+	61.0533	13.3799	9.80199	10.1756	2.30118e-05	0.000628097	0.591889	-0.756601	-1.68951	7.56686	12.7842	-2.00698	-1.42225
NHS	X	17375420	17735995	360575	+	46.2929	10.0469	7.4189	7.71548	8.36942e-06	0.000319565	0.573882	-0.801174	-1.74252	5.62657	9.8044	-2.0527	-1.47921
NID1	1	235975830	236065110	89280	-	110.583	22.681	18.0246	18.4305	3.96031e-06	0.000192614	0.656183	-0.607829	-1.52396	14.6044	22.2566	-1.70981	-1.35832
NIPAL1	4	47914142	48040174	126032	+	8.1317	2.00423	1.20575	1.35528	0.00297899	0.0166697	0.463713	-1.1087	-2.15651	0.858724	1.85184	-3.56121	-1.30588
NIPSNAP3A	9	104747683	104760121	12438	+	49.4823	11.8562	7.90114	8.24705	9.46953e-05	0.00153839	0.580472	-0.784702	-1.72274	6.05791	10.4362	-2.11621	-1.40242
NKAIN3-IT1	8	62977861	62984901	7040	+	24.2945	5.28537	3.91054	4.04909	0.000364078	0.00385777	0.605955	-0.722718	-1.65029	3.05559	5.0426	-2.06683	-1.3177
NKILA	20	57710156	57712781	2625	+	6.94188	1.71424	1.1143	1.15698	0.0108622	0.0414242	0.604577	-0.726002	-1.65405	0.87186	1.4421	-2.37096	-1.15391
NLGN3	X	71144831	71171202	26371	+	15.0665	3.38077	2.44713	2.51108	0.0039294	0.0201051	0.654315	-0.611943	-1.52832	1.98636	3.03579	-1.9818	-1.1786
NOTCH3	19	15159038	15200996	41958	-	12.8183	3.83314	1.77854	2.13639	0.000164946	0.00222686	0.336727	-1.57035	-2.96977	1.07633	3.19645	-4.73345	-1.86323
NPC2	14	74476192	74494178	17986	-	8.77434	2.11836	1.38355	1.46239	0.000899348	0.00717428	0.523729	-0.933107	-1.90938	1.00529	1.91949	-2.63715	-1.38246
NPPA	1	11845709	11848346	2637	-	12.3637	3.2752	1.89334	2.06062	0.000122612	0.0018279	2.20554	1.14113	2.20554	2.83557	1.28566	1.61582	3.0105
NPR1	1	153678688	153693993	15305	+	9.19989	2.19039	1.42323	1.53332	0.000359681	0.00382643	0.475651	-1.07203	-2.10238	0.988476	2.07816	-2.93395	-1.5065
NQO1	16	69706996	69726669	19673	-	41.8496	9.33052	6.77295	6.97493	7.13344e-05	0.0012819	0.623132	-0.68239	-1.6048	5.35545	8.5944	-1.90968	-1.34859
NR1D1	17	40092793	40100590	7797	-	7.65854	1.99399	1.19094	1.27642	0.00166701	0.01105	1.9867	0.990373	1.9867	1.69811	0.854738	1.36492	2.89172
NRIP3	11	8980576	9004050	23474	-	12.0812	2.82444	1.93009	2.01354	0.00368764	0.0193152	0.591808	-0.7568	-1.68974	1.4972	2.52988	-2.30506	-1.23867
NRN1	6	5997999	6007606	9607	-	66.3384	14.3765	10.7951	11.0564	8.31917e-05	0.00139506	0.658293	-0.603198	-1.51908	8.77813	13.3347	-1.77725	-1.29841
NTMT1	9	129608884	129636132	27248	+	41.1042	9.45839	6.66072	6.85071	0.000334009	0.00363772	1.55747	0.639204	1.55747	8.344	5.35741	1.28384	1.88941
NUP62CL	X	107123427	107206434	83007	-	15.0125	3.57188	2.39272	2.50209	0.000523559	0.0049134	0.564145	-0.825862	-1.77259	1.80487	3.1993	-2.31403	-1.35784
OAF	11	120211032	120230335	19303	+	14.5249	3.2752	2.3567	2.42082	0.00231457	0.0139976	1.56727	0.648252	1.56727	2.95573	1.88591	1.21693	2.01846
OLFM2	19	9853718	9936553	82835	-	9.39999	2.238	1.50044	1.56667	0.00527929	0.0247371	0.592746	-0.754514	-1.68706	1.16608	1.96725	-2.36764	-1.20212
OPRK1	8	53225716	53251698	25982	-	28.5319	6.28528	4.55761	4.75532	7.14665e-05	0.00128254	0.568501	-0.814764	-1.75901	3.44712	6.06352	-2.1688	-1.42665
OPTN	10	13099449	13138309	38860	+	21.3707	4.7914	3.43082	3.56179	0.000339244	0.00367069	0.591796	-0.756829	-1.68977	2.64839	4.47518	-2.13049	-1.34022
P2RX3	11	57338352	57372397	34045	+	58.7574	12.6181	9.35634	9.79289	9.20354e-06	0.00033809	0.557625	-0.842632	-1.79332	7.01165	12.5741	-2.13726	-1.50472
P2RX4	12	121209857	121234107	24250	+	10.8107	2.38085	1.74528	1.80179	0.00513611	0.0243147	0.627543	-0.672215	-1.59352	1.38946	2.21413	-2.1548	-1.17844
PAFAH1B3	19	42297033	42303547	6514	-	39.7166	9.43411	6.36622	6.61943	0.00151013	0.0103558	1.61392	0.690573	1.61392	8.17412	5.06475	1.25967	2.06781
PAIP2B	2	71182738	71227104	44366	-	116.224	25.5201	18.8596	19.3707	2.65758e-05	0.000684893	0.644894	-0.632867	-1.55064	15.1889	23.5525	-1.79421	-1.34014
PALM3	19	14053363	14062077	8714	-	19.1547	4.33306	3.00131	3.19245	0.000467295	0.00452922	0.534664	-0.903295	-1.87033	2.22445	4.16046	-2.52074	-1.38775
PALMD	1	99646113	99694542	48429	+	23.7435	6.07212	3.47133	3.95725	2.29944e-06	0.000134114	0.364908	-1.45439	-2.74041	2.11594	5.79855	-3.57272	-2.102
PAPSS2	10	87659613	87747706	88093	+	45.1106	9.8564	7.29616	7.51843	4.9666e-05	0.00101722	0.619612	-0.690563	-1.61391	5.75263	9.28424	-1.9126	-1.36187
PAQR5	15	69298912	69407781	108869	+	17.2023	4.40644	2.59654	2.86704	7.18425e-06	0.000290917	0.411839	-1.27985	-2.42813	1.67266	4.06143	-3.13972	-1.87782
PARD3B	2	204545475	205620163	1074688	+	11.8601	3.04746	1.78399	1.97669	2.38798e-05	0.000642821	0.405222	-1.30321	-2.46778	1.14003	2.81335	-3.31046	-1.83961
PARGP1	10	45854093	45972155	118062	-	19.6875	4.30713	3.16961	3.28125	0.00437085	0.0216234	0.644692	-0.633319	-1.55113	2.57239	3.99011	-2.05641	-1.17
PARP3	3	51942345	51948868	6523	+	8.54628	1.87528	1.37415	1.42438	0.0107235	0.0410716	0.627506	-0.672298	-1.59361	1.09838	1.75038	-2.25394	-1.12673
PARVA	11	12377563	12535357	157794	+	26.8408	5.95198	4.334	4.47347	0.000180428	0.00235691	0.610528	-0.71187	-1.63793	3.39166	5.55528	-2.00222	-1.33991
PATJ	1	61742406	62178676	436270	+	28.1022	7.1114	4.42979	4.6837	7.4745e-05	0.00131825	0.530978	-0.913275	-1.88332	3.24883	6.11857	-2.38037	-1.49005
PAXIP1-AS2	7	154928460	154952189	23729	+	14.7968	3.43501	2.35668	2.46613	0.000423589	0.00423722	0.558452	-0.840494	-1.79066	1.76742	3.16485	-2.33209	-1.37494
PCAT7	9	94555054	94603991	48937	+	28.4531	6.26875	4.6058	4.74219	0.000710065	0.00606841	0.636681	-0.651358	-1.57065	3.68949	5.79489	-1.9484	-1.26613
PCDH20	13	61409685	61415523	5838	-	12.9372	3.03611	2.07475	2.1562	0.00358101	0.0189119	0.609733	-0.71375	-1.64006	1.63344	2.67895	-2.22012	-1.21155
PCDH8	13	52842889	52848642	5753	-	51.0225	11.5935	8.218	8.50375	0.00014224	0.00202517	1.62608	0.701399	1.62608	10.5311	6.47638	1.33968	1.97371
PCDHAC1	5	140926369	141012345	85976	+	39.7245	9.86245	6.32958	6.62074	7.82642e-05	0.00134611	0.56813	-0.815707	-1.76016	4.79736	8.44413	-2.1691	-1.42832
PCGF5	10	91163012	91284338	121326	+	123.815	27.1883	19.9034	20.6358	7.87139e-06	0.000306961	0.597714	-0.742474	-1.67304	15.44	25.8317	-1.94541	-1.43881
PDE3A	12	20369245	20684382	315137	+	6.42556	1.6074	1.0146	1.07093	0.00240171	0.0143542	0.527229	-0.923497	-1.89671	0.739409	1.40244	-2.72261	-1.32134
PDF	16	69326913	69330589	3676	-	50.5414	11.3242	8.08451	8.42357	0.00129585	0.00926462	0.626836	-0.673839	-1.59531	6.49137	10.3558	-2.06093	-1.23489
PDGFC	4	156760454	156971800	211346	-	13.0821	3.2147	2.05242	2.18035	0.000166403	0.00223744	0.505145	-0.98523	-1.97963	1.4635	2.8972	-2.60784	-1.50275
PDLIM3	4	185500660	185535508	34848	-	15.8072	3.476	2.56077	2.63454	0.00510495	0.0242003	0.653288	-0.614209	-1.53072	2.08205	3.18703	-2.00728	-1.1673
PDLIM4	5	132257696	132273455	15759	+	19.7978	4.39563	3.19795	3.29963	0.000411731	0.0041416	1.63719	0.711218	1.63719	4.09688	2.50239	1.31158	2.04362
PDP1	8	93857807	93926069	68262	+	270.41	61.1855	42.7199	45.0684	5.15327e-08	9.13709e-06	0.523132	-0.934753	-1.91156	30.9582	59.1785	-2.15125	-1.69858
PEX11A	15	89677764	89690784	13020	-	27.5183	7.86792	4.19276	4.58638	2.43437e-05	0.000649323	0.445445	-1.16668	-2.24495	2.82678	6.34597	-2.91621	-1.7282
PFKFB2	1	207034366	207081025	46659	+	57.9051	12.5906	9.33311	9.65085	1.44205e-05	0.000459864	0.602397	-0.731213	-1.66003	7.25618	12.0455	-1.94434	-1.4173
PGM5	9	68328308	68531062	202754	+	6.60071	1.76532	1.0116	1.10012	0.0022375	0.0136447	0.476363	-1.06987	-2.09924	0.709928	1.49031	-3.18832	-1.38217
PGPEP1	19	18340598	18369951	29353	+	9.41358	2.4714	1.42881	1.56893	0.000594794	0.00535813	0.455253	-1.13526	-2.19658	0.98163	2.15623	-3.21327	-1.50157
PHETA1	12	111360651	111369122	8471	-	10.8631	2.76177	1.68771	1.81052	0.0025494	0.0148779	0.528194	-0.92086	-1.89324	1.25155	2.36949	-2.75315	-1.30191
PHOSPHO2	2	169694454	169701709	7255	+	21.4866	4.96459	3.42347	3.5811	0.00253185	0.0148385	0.601353	-0.733716	-1.66292	2.68961	4.47259	-2.23017	-1.23994
PIGA	X	15319451	15335581	16130	-	125.598	29.569	19.9462	20.933	3.29055e-07	3.52885e-05	0.540962	-0.8864	-1.84856	14.6973	27.1688	-2.10996	-1.61954
PIGCP1	11	33075566	33076461	895	-	40.5701	8.88347	6.58129	6.76169	0.000117415	0.00178241	0.636134	-0.652598	-1.572	5.25793	8.26545	-1.87401	-1.31866
PIGN	18	61905255	62187119	281864	-	107.898	23.141	17.4223	17.983	1.22012e-06	8.27817e-05	0.606221	-0.722085	-1.64956	13.5743	22.3916	-1.86378	-1.45997
PIK3AP1	10	96593315	96720515	127200	-	19.631	4.66637	3.01973	3.27184	0.000343005	0.00369633	0.48972	-1.02997	-2.04198	2.15112	4.39255	-2.83786	-1.46931
PLAG1	8	56160909	56211325	50416	-	11.5173	2.77401	1.83967	1.91955	0.00110585	0.00835069	0.569177	-0.81305	-1.75692	1.39253	2.44657	-2.34027	-1.31898
PLD5	1	242082986	242524698	441712	-	122.226	26.4276	19.6763	20.371	3.69078e-06	0.00018382	0.59992	-0.737157	-1.66689	15.277	25.465	-1.91633	-1.44991
PLEKHA2	8	38901235	38973913	72678	+	66.3772	15.3141	10.4767	11.0629	3.48176e-07	3.60773e-05	0.51617	-0.954081	-1.93735	7.53257	14.5932	-2.23493	-1.67938
PLEKHA6	1	204218853	204377666	158813	-	97.9549	23.4744	15.3715	16.3258	1.18702e-07	1.67925e-05	0.500269	-0.999225	-1.99893	10.8878	21.7639	-2.28921	-1.74545
PLEKHG4B	5	92151	189973	97822	+	33.7446	7.6185	5.3113	5.6241	8.03895e-05	0.00136181	0.532517	-0.9091	-1.87787	3.90851	7.3397	-2.38937	-1.47587
PLEKHH2	2	43637260	43767988	130728	+	11.8521	2.857	1.85705	1.97534	0.00119016	0.00880503	0.529421	-0.917512	-1.88885	1.36756	2.58313	-2.63579	-1.35359
PLXNA4	7	132123332	132648689	525357	-	49.5286	13.1132	7.81122	8.25477	1.78243e-05	0.000536263	0.529402	-0.917564	-1.88892	5.71478	10.7948	-2.30361	-1.54888
PMEL	12	55954105	55973318	19213	-	18.1429	4.90444	2.61232	3.02382	1.51775e-05	0.000476014	0.35378	-1.49908	-2.82661	1.58041	4.46722	-3.9326	-2.03167
POC1B-AS1	12	89524594	89548006	23412	+	8.24431	2.19039	1.23179	1.37405	0.00206251	0.012876	0.454084	-1.13897	-2.20224	0.858182	1.88992	-3.50868	-1.38225
PODXL	7	131500262	131558218	57956	-	147.77	31.6103	23.8893	24.6283	7.12988e-07	5.8846e-05	0.612609	-0.706962	-1.63236	18.7119	30.5446	-1.82838	-1.45736
POGLUT3	11	108472112	108498385	26273	-	207.579	46.9482	33.0377	34.5965	1.55019e-07	2.02102e-05	0.548812	-0.865617	-1.82212	24.5181	44.6749	-2.05484	-1.61576
POLQ	3	121431427	121546642	115215	-	199.089	41.0443	32.4472	33.1815	7.96983e-07	6.19783e-05	0.655796	-0.608681	-1.52486	26.2838	40.0792	-1.68315	-1.38147
POLRMTP1	17	62136972	62140640	3668	-	7.09501	1.74886	1.13153	1.1825	0.00809919	0.0333136	1.71613	0.77916	1.71613	1.49428	0.870725	1.18927	2.47639
POMT1	9	131502902	131523807	20905	+	26.5221	6.52708	4.12691	4.42035	0.000753155	0.00634291	1.86221	0.897018	1.86221	5.75194	3.08876	1.35504	2.55921
PON2	7	95404862	95435330	30468	-	8.54609	2.26966	1.29113	1.42435	0.00115992	0.00865094	0.450498	-1.15041	-2.21976	0.884753	1.96394	-3.33043	-1.4795
PPARA	22	46150521	46243757	93236	+	52.4301	11.1173	8.35599	8.73834	7.73167e-05	0.00133701	0.57638	-0.794908	-1.73497	6.39009	11.0866	-2.14019	-1.40647
PPP1R14A	19	38251237	38256533	5296	-	29.9757	7.92929	4.75369	4.99596	0.000268535	0.00313518	1.78375	0.834912	1.78375	6.40254	3.58938	1.39871	2.27478
PPP1R3D	20	59936663	59940306	3643	-	13.6114	2.99146	2.20618	2.26857	0.00398286	0.0203083	0.64431	-0.634174	-1.55205	1.77784	2.7593	-2.03693	-1.18259
PPP2R2A	8	26291508	26372681	81173	+	763.966	165.552	123.146	127.328	6.08636e-09	2.02341e-06	0.595774	-0.747162	-1.67849	95.0743	159.581	-1.81418	-1.55295
PPP2R2C	4	6320578	6563601	243023	-	7.93339	2.26966	1.1053	1.32223	0.000227066	0.00279844	0.333684	-1.58345	-2.99685	0.661637	1.98283	-4.86638	-1.84554
PPP2R5B	11	64917553	64934476	16923	+	9.79759	2.28562	1.557	1.63293	0.000990169	0.00770466	0.546463	-0.871804	-1.82995	1.15404	2.11183	-2.47538	-1.35281
PPP3CB	10	73436428	73496025	59597	-	510.526	108.038	83.2907	85.0877	5.38116e-07	4.86794e-05	0.665599	-0.587275	-1.50241	68.0047	102.171	-1.64642	-1.37099
PRADC1	2	73228010	73233240	5230	-	39.9374	9.22209	6.45218	6.65624	0.000232827	0.00284049	1.59837	0.676602	1.59837	8.18909	5.1234	1.31395	1.94436
PRCD	17	76527586	76553579	25993	+	23.2157	5.3229	3.66709	3.86929	0.00118393	0.00877405	0.572176	-0.805468	-1.74771	2.81637	4.92221	-2.36332	-1.29246
PRKCD	3	53156009	53192718	36709	+	19.711	4.23784	3.17508	3.28517	0.000801614	0.00660781	0.612583	-0.707023	-1.63243	2.49592	4.07442	-2.08224	-1.27979
PRKCH	14	61187559	61550977	363418	+	25.4961	6.50617	3.91798	4.24934	3.45494e-06	0.000175531	0.447975	-1.15851	-2.23227	2.62932	5.86936	-2.77088	-1.79836
PROKR1	2	68643579	68658252	14673	+	97.139	21.4745	15.5493	16.1898	7.47643e-07	5.95143e-05	0.568904	-0.813743	-1.75777	11.7413	20.6384	-2.00468	-1.54126
PROSER3	19	35758143	35771029	12886	+	21.3023	4.48517	3.45486	3.55038	0.00247093	0.0146233	0.658214	-0.603372	-1.51926	2.81859	4.28217	-1.93988	-1.18985
PRPH	12	49293252	49298687	5435	+	155.289	36.7919	25.1348	25.8815	7.75701e-05	0.00133965	1.55469	0.636627	1.55469	31.5011	20.262	1.32152	1.829
PRRC2B	9	131373636	131500198	126562	+	1089.61	245.402	177.034	181.601	2.01974e-05	0.00058388	0.660454	-0.598469	-1.51411	144.466	218.737	-1.73069	-1.32463
PRUNE2	9	76611376	76906115	294739	-	124.295	28.7441	20.0977	20.7159	2.17229e-05	0.000604332	0.62731	-0.672749	-1.59411	15.9715	25.4603	-1.8515	-1.3725
PRXL2C	9	96639577	96655318	15741	-	24.9986	5.34618	4.02869	4.16643	9.49405e-05	0.00153839	0.59553	-0.747754	-1.67918	3.11023	5.22263	-2.04483	-1.37891
PSMD14	2	161308425	161411718	103293	+	619.527	131.396	100.076	103.254	6.90758e-09	2.04127e-06	0.60523	-0.724445	-1.65226	77.8613	128.648	-1.78322	-1.53093
PSME2P2	13	48771128	48771828	700	+	10.6098	2.264	1.72167	1.7683	0.00957219	0.037783	0.655794	-0.608686	-1.52487	1.40071	2.1359	-2.06201	-1.12765
PTER	10	16436943	16513746	76803	+	76.6504	17.7129	12.1612	12.7751	7.4676e-05	0.00131825	0.565452	-0.822524	-1.7685	9.22888	16.3212	-2.192	-1.42681
PTGES	9	129738331	129753043	14712	-	6.63166	1.51314	1.05449	1.10528	0.00290325	0.0163194	0.549016	-0.865081	-1.82144	0.783483	1.42707	-2.59066	-1.28062
PTGES3L	17	42968088	42980434	12346	-	14.8897	4.54468	2.23351	2.48162	0.00038163	0.00398345	0.432665	-1.20868	-2.31126	1.4989	3.46433	-3.30325	-1.61717
PTGFR	1	78303884	78540702	236818	+	40.688	9.42788	6.54059	6.78134	6.04154e-05	0.00116604	0.595024	-0.74898	-1.6806	5.05956	8.50312	-2.02476	-1.39494
PTGIS	20	49503874	49568138	64264	-	7.61718	2.09852	1.04226	1.26953	3.83047e-06	0.000187431	0.275249	-1.86119	-3.63308	0.548029	1.99103	-5.16307	-2.55647
PTN	7	137227341	137343775	116434	-	28.3503	7.42804	4.36386	4.72504	3.51939e-06	0.000177276	0.452971	-1.14251	-2.20765	2.94611	6.50398	-2.72932	-1.78568
PTPN14	1	214348700	214552450	203750	-	18.9997	5.17918	2.70813	3.16662	1.07211e-06	7.62405e-05	0.325992	-1.61709	-3.06756	1.55701	4.77623	-4.02606	-2.33726
PTPN3	9	109375466	109498314	122848	-	86.2245	21.4308	12.9477	14.3707	2.20464e-09	1.19063e-06	0.395233	-1.33922	-2.53015	8.14172	20.5998	-2.87424	-2.22726
PTX3	3	157436850	157443634	6784	+	100.847	21.9545	16.1786	16.8078	2.75196e-06	0.000148822	1.71521	0.778389	1.71521	21.2351	12.3804	1.48652	1.97909
PWP2	21	44107373	44131182	23809	+	64.0659	14.0438	10.4315	10.6776	0.000155476	0.00213366	1.50314	0.587984	1.50314	12.8239	8.53139	1.27648	1.77006
PYGL	14	50857891	50944484	86593	-	38.5462	12.7609	3.41143	6.42436	1.2693e-09	8.03767e-07	0.0862952	-3.53458	-11.5881	1.0207	11.828	-16.041	-8.37134
RAB11FIP4	17	31391675	31538212	146537	+	157.983	34.3966	25.6123	26.3306	3.67104e-06	0.000183524	0.632684	-0.660443	-1.58057	20.4068	32.2543	-1.78953	-1.396
RAB15	14	64945814	64973227	27413	-	56.8393	13.3149	9.0763	9.47322	9.84315e-06	0.000355691	0.565684	-0.821931	-1.76777	6.84538	12.1011	-2.09512	-1.49156
RAB31	18	9708275	9862552	154277	+	18.3807	4.7616	2.73892	3.06344	3.27968e-05	0.000780564	0.405757	-1.30131	-2.46453	1.76846	4.35842	-3.35551	-1.81013
RAB33B	4	139453232	139476610	23378	+	64.3896	15.9988	10.3859	10.7316	0.000324465	0.00356295	0.631862	-0.662319	-1.58262	8.31062	13.1526	-1.927	-1.29979
RAB3IP	12	69738681	69823205	84524	+	78.7016	16.9214	12.7668	13.1169	1.03504e-05	0.00036802	0.63209	-0.661799	-1.58205	10.1601	16.0738	-1.81494	-1.37905
RABGGTA	14	24265538	24271740	6202	-	10.7931	2.82444	1.70135	1.79886	0.00677765	0.0293485	0.580108	-0.785606	-1.72382	1.32084	2.27688	-2.49665	-1.19021
RACK1	5	181236897	181248097	11200	-	2941.72	646.025	476.399	490.286	3.32143e-06	0.000169878	0.635332	-0.654418	-1.57398	380.956	599.617	-1.7782	-1.39322
RAD51D	17	35092208	35121523	29315	-	89.0733	20.4485	14.1328	14.8456	3.00256e-06	0.000157818	0.5442	-0.877792	-1.83756	10.4636	19.2275	-2.16192	-1.56187
RALGPS1	9	126914774	127223167	308393	+	24.7709	5.44705	3.92657	4.12848	8.10884e-05	0.00137016	0.544356	-0.877378	-1.83703	2.91042	5.34653	-2.31254	-1.4593
RARG	12	53210567	53232981	22414	-	26.0199	5.7596	4.1789	4.33665	0.000107662	0.00168831	0.586617	-0.769509	-1.70469	3.20676	5.46653	-2.09472	-1.38728
RASSF2	20	4780023	4823609	43586	-	45.5908	10.1879	7.30772	7.59847	9.9588e-05	0.00159478	0.593479	-0.752731	-1.68498	5.65998	9.53695	-2.06282	-1.37634
RASSF8-AS1	12	25936683	25959766	23083	-	33.4292	7.05436	5.42821	5.57153	0.000144337	0.00204626	0.637078	-0.650458	-1.56967	4.33638	6.80667	-1.87887	-1.31135
RBM43	2	151247940	151261864	13924	-	28.6367	6.00183	4.62899	4.77279	0.00244819	0.0145339	0.657036	-0.605955	-1.52199	3.78494	5.76063	-1.95154	-1.18698
RDH10	8	73294602	73325282	30680	+	41.1332	10.1897	6.4466	6.85554	0.000153038	0.00211962	0.53244	-0.909309	-1.87815	4.76386	8.94722	-2.43047	-1.45134
RDH11	14	67676800	67695794	18994	-	467.734	106.182	73.3502	77.9556	2.64661e-10	3.18567e-07	0.494369	-1.01634	-2.02278	51.5787	104.332	-2.19237	-1.86631
RECQL5	17	75626845	75667190	40345	-	55.2392	11.3405	8.98774	9.20653	6.19128e-05	0.00118228	0.65156	-0.61803	-1.53478	7.26417	11.1489	-1.79379	-1.31317
RET	10	43077064	43130352	53288	+	7.4453	1.74134	1.1643	1.24088	0.00747504	0.0314368	0.555406	-0.848385	-1.80048	0.886192	1.59557	-2.7422	-1.18217
RETREG1	5	16473038	16617059	144021	-	10.4457	2.50034	1.64366	1.74094	0.000383173	0.00399092	0.514119	-0.959827	-1.94508	1.18228	2.29961	-2.62082	-1.44356
RFTN1	3	16313574	16514027	200453	-	40.9445	9.98194	6.61911	6.82409	0.00145723	0.0100981	0.65253	-0.615883	-1.5325	5.38922	8.25896	-1.91684	-1.22522
RFXAP	13	36819222	36829105	9883	+	71.9825	15.6266	11.6411	11.9971	3.19605e-05	0.000771344	0.624316	-0.679652	-1.60175	9.22231	14.7719	-1.87741	-1.36657
RGS16	1	182598623	182604390	5767	-	9.27227	2.37053	1.4243	1.54538	0.000668058	0.00581403	0.474733	-1.07481	-2.10645	0.994949	2.09581	-3.03636	-1.46133
RGS4	1	163068775	163076803	8028	+	50.2262	11.1896	8.01701	8.37104	1.80507e-05	0.000539413	0.567121	-0.818272	-1.76329	6.05874	10.6833	-2.11559	-1.46966
RGS9	17	65100812	65227704	126892	+	16.9704	4.46482	2.47267	2.82841	9.65889e-07	7.09635e-05	0.349241	-1.51771	-2.86336	1.46422	4.19259	-3.6768	-2.22988
RHOC	1	112701127	112707435	6308	-	25.459	5.74966	4.12607	4.24316	0.00261086	0.0151085	0.660395	-0.598599	-1.51425	3.3753	5.11103	-1.92781	-1.1894
RIMS3	1	40620680	40665683	45003	-	432.711	99.6591	69.2844	72.1184	4.09445e-08	7.45863e-06	0.570248	-0.810338	-1.75362	52.3808	91.8561	-1.93762	-1.5871
RIPK1	6	3063991	3115188	51197	+	70.1181	15.4331	11.3725	11.6864	0.000251093	0.00298662	0.654624	-0.611262	-1.5276	9.24702	14.1257	-1.83047	-1.27484
RITA1	12	113185526	113192369	6843	+	58.5264	13.2644	9.46168	9.7544	0.000290484	0.00329582	0.639843	-0.644211	-1.56288	7.61205	11.8968	-1.8986	-1.28653
RN7SL1	14	49586580	49586879	299	+	22.6522	10.0892	3.08403	3.77537	0.00631852	0.027952	2.69343	1.42944	2.69343	5.50637	2.04437	1.55624	4.6616
RND2	17	43025231	43032042	6811	+	37.9312	8.22096	6.14931	6.32187	9.60637e-05	0.00155219	0.629715	-0.667228	-1.58802	4.88549	7.75825	-1.89186	-1.33298
RNF170	8	42849637	42897291	47654	-	117.137	25.379	19.0216	19.5228	5.8308e-06	0.000250122	0.639536	-0.644902	-1.56363	15.2306	23.815	-1.77455	-1.37778
RNF215	22	30368811	30421772	52961	-	6.97637	2.25593	1.05743	1.16273	0.00444294	0.0218818	0.471929	-1.08336	-2.11896	0.745587	1.57987	-3.2986	-1.36118
RNF220	1	44405194	44651725	246531	+	89.617	19.1079	14.3501	14.9362	8.50518e-06	0.000321222	0.581082	-0.783186	-1.72093	10.9787	18.8936	-2.02344	-1.46364
RNFT1	17	59952240	59964762	12522	-	103.361	22.9847	16.7874	17.2268	7.99209e-05	0.00135906	0.654255	-0.612075	-1.52846	13.6264	20.8273	-1.78704	-1.30729
RNFT1-DT	17	59964832	59996973	32141	+	13.1306	2.81636	2.09653	2.18844	0.00525793	0.0246862	0.615949	-0.699116	-1.62351	1.66833	2.70855	-2.25071	-1.17109
RPARP-AS1	10	102449816	102461107	11291	+	32.0044	7.42804	5.04858	5.33406	8.4416e-05	0.00141026	0.537062	-0.89684	-1.86198	3.72753	6.9406	-2.35892	-1.46973
RPL11	1	23691742	23696836	5094	+	1379.44	289.844	224.113	229.906	1.01752e-07	1.50345e-05	0.6401	-0.643632	-1.56226	179.456	280.356	-1.70289	-1.43324
RPL12	9	127447674	127451407	3733	-	1484.64	322.485	240.463	247.44	7.51873e-07	5.95143e-05	0.630288	-0.665917	-1.58658	191.326	303.554	-1.76716	-1.42445
RPL12P16	2	203190780	203191278	498	+	971.83	219.906	156.442	161.972	2.65695e-07	2.96908e-05	0.598158	-0.741402	-1.6718	121.245	202.698	-1.86264	-1.50051
RPL12P4	20	55074644	55075141	497	+	489.306	102.609	79.2458	81.551	7.50288e-07	5.95143e-05	0.628033	-0.671087	-1.59227	62.9185	100.183	-1.77562	-1.42786
RPL12P42	19	13157959	13158789	830	-	7.72478	1.74479	1.23834	1.28746	0.00681469	0.0294609	0.599881	-0.737253	-1.667	0.965477	1.60945	-2.36026	-1.17736
RPL13	16	89560657	89566829	6172	+	685.004	147.682	110.626	114.167	2.03275e-05	0.000584077	0.631322	-0.663552	-1.58398	88.3656	139.969	-1.84111	-1.36276
RPL15	3	23916591	23924375	7784	+	4340.72	925.096	696.662	723.453	6.14638e-10	5.10841e-07	0.575439	-0.797265	-1.7378	528.491	918.414	-1.85998	-1.62365
RPL15P3	6	12514110	12514725	615	+	448.568	95.3313	72.6051	74.7614	0.000118342	0.00179238	0.654012	-0.612611	-1.52902	59.1227	90.4	-1.80963	-1.29193
RPL17	18	49488453	49492524	4071	-	1257.48	294.709	196.268	209.581	4.07006e-10	4.16336e-07	0.483004	-1.04989	-2.07038	136.518	282.643	-2.25725	-1.89897
RPL17P36	10	118872054	118872603	549	-	36.2391	8.50156	5.67745	6.03984	0.000131933	0.00193008	0.530195	-0.915404	-1.8861	4.18548	7.89421	-2.44173	-1.4569
RPL18A	19	17859910	17864154	4244	+	400.862	90.2412	65.0144	66.8104	6.32528e-05	0.0011965	1.52763	0.611292	1.52763	80.7566	52.8641	1.31374	1.77634
RPL18AP3	12	104265309	104265837	528	+	721.64	168.042	117.101	120.273	4.67471e-05	0.000977425	1.52116	0.60517	1.52116	145.136	95.4112	1.3157	1.75871
RPL22L1	3	170864875	170870209	5334	-	931.14	218.075	144.806	155.19	1.1403e-09	7.58184e-07	0.474487	-1.07556	-2.10754	99.8797	210.5	-2.32166	-1.91316
RPL23	17	38847860	38853765	5905	-	3171.05	687.297	509.175	528.509	6.81433e-09	2.04127e-06	0.580539	-0.784535	-1.72254	388.247	668.77	-1.87102	-1.58584
RPL23P8	7	20827326	20827754	428	+	40.9493	8.93664	6.6396	6.82489	0.000202407	0.00258064	0.640307	-0.643165	-1.56175	5.3283	8.32148	-1.88049	-1.29704
RPL24P7	3	23134372	23134825	453	+	11.9624	2.97091	1.85259	1.99374	0.000429799	0.00429037	0.490527	-1.0276	-2.03863	1.31226	2.67522	-2.82898	-1.46908
RPL26	17	8377516	8383214	5698	-	3536.23	794.191	566.165	589.372	6.89905e-09	2.04127e-06	0.56884	-0.813906	-1.75796	427.396	751.347	-1.91527	-1.61358
RPL26P19	5	56504635	56505073	438	-	755.863	166.531	121.587	125.977	7.50605e-08	1.2026e-05	0.591325	-0.757977	-1.69112	93.6244	158.33	-1.86595	-1.53267
RPL27	17	42998273	43002960	4687	+	4514.16	1012.06	718.193	752.361	1.21241e-07	1.68566e-05	0.551654	-0.858165	-1.81273	534.968	969.753	-2.0386	-1.61189
RPL29	3	51993522	51995896	2374	-	351.692	79.7277	55.8719	58.6153	5.39307e-06	0.000238263	0.559307	-0.838289	-1.78793	42.0494	75.1813	-2.11108	-1.51424
RPL29P11	3	37016523	37017015	492	-	30.8295	7.24263	4.79883	5.13825	0.00344066	0.0183824	0.566495	-0.819866	-1.76524	3.71631	6.56018	-2.5324	-1.23048
RPL31	2	101002229	101024033	21804	+	2978.6	640.772	480.255	496.433	1.71369e-08	4.0694e-06	0.599806	-0.737432	-1.66721	372.25	620.617	-1.81371	-1.53253
RPL31P49	12	110460988	110461363	375	+	30.1195	7.04075	4.80419	5.01991	5.73843e-05	0.00112884	0.562623	-0.829761	-1.77739	3.61484	6.42498	-2.1851	-1.44575
RPL32	3	12834485	12841583	7098	-	3224.45	682.09	523.771	537.409	2.17506e-06	0.000130251	0.649106	-0.623474	-1.54058	423.06	651.758	-1.72314	-1.37736
RPL32P3	3	129382922	129399656	16734	-	23.2771	5.09491	3.71171	3.87951	0.000216523	0.00270359	0.570573	-0.809517	-1.75263	2.81877	4.94025	-2.22389	-1.38123
RPL34	4	108620566	108630413	9847	+	1721.05	397.104	272.432	286.842	1.91955e-09	1.16028e-06	0.526422	-0.925709	-1.89962	197.848	375.836	-2.0726	-1.74107
RPL34P18	8	93957338	93957692	354	-	123.925	30.19	19.3599	20.6541	1.6635e-07	2.10678e-05	0.491091	-1.02594	-2.03628	13.6049	27.7034	-2.35195	-1.76299
RPL34P34	19	22368599	22368953	354	-	8.61253	2.44977	1.29347	1.43542	0.000355452	0.00379358	0.424206	-1.23716	-2.35734	0.855094	2.01575	-3.44391	-1.61359
RPL35P2	6	34263311	34263674	363	-	15.9817	3.90053	2.57339	2.66361	0.00230564	0.0139619	0.618243	-0.693754	-1.61749	2.03524	3.29198	-2.11705	-1.23581
RPL36	19	5674947	5691876	16929	+	146.848	34.4734	23.0102	24.4746	1.21663e-06	8.27817e-05	0.507357	-0.978927	-1.971	16.4757	32.4735	-2.32848	-1.6684
RPL36A	X	101390824	101396156	5332	+	199.621	41.8336	32.4228	33.2701	2.72072e-06	0.000148279	0.642503	-0.638226	-1.55641	26.0288	40.5115	-1.74961	-1.38455
RPL37	5	40825262	40835223	9961	-	2199.24	474.974	354.95	366.54	3.9725e-07	3.90646e-05	0.611835	-0.708786	-1.63443	278.269	454.811	-1.82125	-1.46677
RPL37A	2	216498825	216579181	80356	+	4563.74	946.486	742.512	760.623	1.22087e-05	0.000417355	0.665591	-0.587292	-1.50242	607.908	913.337	-1.70419	-1.32455
RPL41	12	56116590	56117968	1378	+	3650.87	901.265	567.952	608.479	2.3279e-09	1.19063e-06	0.476861	-1.06836	-2.09705	392.941	824.017	-2.32262	-1.89339
RPL41P2	15	28315651	28316060	409	+	117.06	29.7634	18.1593	19.51	3.42669e-07	3.58804e-05	0.474922	-1.07424	-2.10561	12.5644	26.4556	-2.46938	-1.79543
RPL5	1	92832013	92841925	9912	+	9944.21	2237.56	1567.47	1657.37	2.87472e-10	3.18567e-07	0.510741	-0.969336	-1.95794	1120.62	2194.11	-2.11552	-1.8121
RPL5P1	15	24908932	24909826	894	-	234.99	54.2454	36.8018	39.165	6.83544e-09	2.04127e-06	0.493146	-1.01991	-2.0278	25.8703	52.4597	-2.25793	-1.82112
RPL5P12	4	98025390	98026241	851	+	8.63299	2.41353	1.21417	1.43883	2.11853e-05	0.000595607	0.315179	-1.66576	-3.1728	0.689623	2.18804	-4.61167	-2.18287
RPL5P17	5	85464434	85465311	877	+	13.8282	3.22284	2.14658	2.3047	6.42049e-05	0.00121106	0.475542	-1.07236	-2.10286	1.48553	3.12387	-2.76089	-1.60167
RPL5P23	8	42341767	42342635	868	-	63.0026	14.698	9.98694	10.5004	3.80174e-06	0.000187243	0.538056	-0.894171	-1.85854	7.3467	13.6542	-2.19727	-1.57203
RPL5P29	11	56357328	56358222	894	+	18.3577	4.48056	2.88659	3.05962	0.00120732	0.00887011	0.549468	-0.863893	-1.81994	2.16999	3.94926	-2.48076	-1.33515
RPL5P34	22	42776406	42777297	891	-	585.49	133.787	93.4219	97.5817	7.15915e-08	1.17534e-05	0.559226	-0.838496	-1.78818	69.9966	125.167	-1.99381	-1.60377
RPL5P4	1	35350722	35351608	886	+	158.972	36.2923	24.9055	26.4953	5.08665e-09	1.98948e-06	0.491933	-1.02347	-2.0328	17.4725	35.5181	-2.25772	-1.83028
RPL6	12	112405190	112418839	13649	-	5413.39	1237.46	866.36	902.232	1.32106e-08	3.31461e-06	0.568292	-0.815297	-1.75966	653.871	1150.59	-1.92695	-1.60689
RPL6P27	18	6462144	6463016	872	-	4722.25	1014.83	762.05	787.041	8.5719e-09	2.32631e-06	0.602515	-0.73093	-1.65971	591.825	982.257	-1.79529	-1.53436
RPL7	8	73290242	73295790	5548	-	1967.23	482.442	309.485	327.871	8.54178e-09	2.32631e-06	0.509697	-0.972289	-1.96195	221.388	434.353	-2.17696	-1.76818
RPL7A	9	133348218	133351427	3209	+	2237.79	490.53	359.491	372.965	1.03273e-06	7.49179e-05	0.594825	-0.749462	-1.68117	278.211	467.718	-1.90568	-1.4831
RPL7AP11	3	121494110	121494909	799	+	24.8214	5.74231	3.97432	4.13689	0.000164856	0.00222686	0.579776	-0.786432	-1.7248	3.03647	5.23731	-2.15151	-1.38273
RPL7AP30	4	112788083	112788879	796	-	117.096	27.746	18.6973	19.516	3.7143e-05	0.000838586	0.582597	-0.77943	-1.71645	14.3688	24.6633	-2.06615	-1.42594
RPL7AP50	10	63902451	63903246	795	-	28.7332	6.93543	4.53564	4.78887	0.000109639	0.00170126	0.53765	-0.895261	-1.85995	3.34892	6.22882	-2.36069	-1.46542
RPL7AP6	14	69885340	69886141	801	-	1628.91	354.202	262.195	271.485	1.10813e-07	1.59536e-05	0.596139	-0.746279	-1.67746	202.793	340.177	-1.85618	-1.51595
RPL7AP66	18	39334872	39335673	801	-	56.9285	13.1133	9.10607	9.48809	3.66446e-05	0.000830153	0.581004	-0.78338	-1.72116	6.97356	12.0026	-2.07571	-1.42717
RPL7L1	6	42879616	42889926	10310	+	2231.42	481.748	359.686	371.903	2.29361e-09	1.19063e-06	0.595496	-0.747835	-1.67927	277.615	466.191	-1.80365	-1.56347
RPL7L1P8	3	182610674	182611415	741	+	17.3913	3.63428	2.8144	2.89856	0.000720155	0.00612316	0.619746	-0.690251	-1.61356	2.21809	3.57903	-2.03484	-1.2795
RPL7P1	5	150094302	150095049	747	+	1847.33	451.549	290.236	307.889	6.74833e-09	2.04127e-06	0.505371	-0.984587	-1.97875	206.724	409.054	-2.19388	-1.78471
RPL7P21	5	143332605	143333240	635	+	52.9616	12.0067	8.53244	8.82693	3.22964e-05	0.000773834	0.603858	-0.727718	-1.65602	6.64674	11.0071	-1.96265	-1.39729
RPL7P22	5	72725419	72726152	733	+	42.0543	9.35936	6.82803	7.00905	0.000862962	0.00698033	0.660213	-0.598997	-1.51466	5.57454	8.44356	-1.85219	-1.23864
RPL7P46	16	11027024	11027764	740	+	12.1031	2.76336	1.89772	2.01718	0.0024215	0.0144252	0.55023	-0.861892	-1.81742	1.43193	2.60242	-2.59617	-1.27227
RPL7P9	1	96678874	96679621	747	-	5607.73	1373.12	880.732	934.622	3.25567e-09	1.49289e-06	0.503215	-0.990753	-1.98722	625.746	1243.5	-2.19032	-1.80295
RPL8	8	144789765	144792588	2823	-	929.379	208.512	148.829	154.896	6.84055e-05	0.00125991	0.606754	-0.720817	-1.64812	116.986	192.807	-1.98647	-1.36739
RPL9	4	39452521	39458950	6429	-	683.192	149.057	109.414	113.865	5.90901e-09	2.01482e-06	0.568525	-0.814703	-1.75894	82.5429	145.188	-1.91427	-1.6162
RPL9P25	15	66379337	66379916	579	-	12.7294	2.72181	2.03933	2.12157	0.00347053	0.0185049	0.609953	-0.71323	-1.63947	1.60757	2.63556	-2.22938	-1.20566
RPL9P32	19	29956369	29956989	620	-	13.7715	3.31007	2.19331	2.29525	0.00588325	0.026647	0.602028	-0.732097	-1.66105	1.72507	2.86543	-2.30245	-1.19833
RPLP1	15	69452814	69456206	3392	+	1147.34	268.254	185.822	191.224	0.000165489	0.00223193	1.52092	0.604944	1.52092	230.738	151.709	1.28958	1.79377
RPS10	6	34417454	34426070	8616	-	1212.02	265.545	194.918	202.004	2.29108e-08	5.16386e-06	0.588645	-0.764529	-1.69882	149.698	254.31	-1.8583	-1.55302
RPS14	5	150442635	150449740	7105	-	2522.78	558.945	408.314	420.463	1.10522e-06	7.81447e-05	0.628389	-0.670271	-1.59137	324.51	516.416	-1.78094	-1.42199
RPS15A	16	18781295	18790384	9089	-	3184.84	692.194	518.59	530.807	1.35309e-06	9.13373e-05	0.660067	-0.599317	-1.515	422.113	639.5	-1.67767	-1.3681
RPS15AP1	20	21166206	21166597	391	-	40.3707	8.57724	6.56451	6.72844	0.000268804	0.00313557	0.654829	-0.61081	-1.52712	5.325	8.13189	-1.83223	-1.27281
RPS17	15	82536750	82540460	3710	-	2913.03	671.083	464.103	485.505	5.24799e-07	4.77998e-05	0.561118	-0.833624	-1.78216	349.013	621.996	-2.0306	-1.56411
RPS18	6	33272075	33276512	4437	+	4295.34	996.339	678.132	715.89	5.43329e-09	2.01482e-06	0.519672	-0.944326	-1.92429	489.617	942.164	-2.12096	-1.74586
RPS18P12	17	14705076	14705535	459	-	26.8402	6.19128	4.29227	4.47337	0.00023988	0.00289993	0.581162	-0.782987	-1.72069	3.28841	5.65833	-2.16022	-1.37059
RPS18P9	6	149592687	149601879	9192	+	23.5051	5.44764	3.74074	3.91752	0.000191961	0.00247115	0.562604	-0.829809	-1.77745	2.82095	5.01409	-2.25847	-1.39888
RPS20P10	2	71984182	71984435	253	-	19.3308	4.34482	3.11337	3.22181	0.00522193	0.0245936	1.54449	0.627126	1.54449	3.91123	2.53238	1.16286	2.05135
RPS24	10	78033760	78056814	23054	+	6304.76	1370.76	1025.88	1050.79	5.61726e-07	4.95327e-05	0.65309	-0.614646	-1.53118	830.279	1271.31	-1.68616	-1.39045
RPS28	19	8321158	8323341	2183	+	52.04	11.703	8.45976	8.67333	0.000456524	0.00446059	1.50398	0.588788	1.50398	10.419	6.92762	1.24822	1.81215
RPS28P7	11	82689559	82689769	210	+	37.4066	10.0813	5.79562	6.23444	0.00682799	0.0294801	1.79343	0.842723	1.79343	8.00524	4.46364	1.24288	2.58787
RPS3A	4	151099624	151104643	5019	+	3338.26	749.477	534.573	556.377	9.75248e-09	2.59377e-06	0.570202	-0.810454	-1.75376	404.085	708.67	-1.91519	-1.60595
RPS3AP21	5	111192226	111193043	817	-	362.208	81.7566	58.3993	60.3679	7.21304e-07	5.8846e-05	0.60596	-0.722706	-1.65027	45.556	75.1799	-1.8533	-1.46949
RPS3AP26	7	98385801	98386585	784	-	2463.43	571.532	394.946	410.571	4.05437e-08	7.45863e-06	0.577464	-0.792198	-1.73171	300.596	520.546	-1.90876	-1.57109
RPS3AP47	15	43115702	43116494	792	-	24.1163	5.58959	3.85307	4.01938	0.00180406	0.0116349	0.609471	-0.71437	-1.64077	3.0441	4.99466	-2.16391	-1.2441
RPS3AP5	10	84560443	84561264	821	+	157.254	36.8804	24.9775	26.2089	2.03068e-07	2.43279e-05	0.541423	-0.885171	-1.84698	18.4117	34.0061	-2.09542	-1.628
RPS3AP6	15	59768352	59769147	795	+	8188.63	1802.78	1311.61	1364.77	2.82736e-09	1.34279e-06	0.568975	-0.813563	-1.75755	989.845	1739.7	-1.90248	-1.62365
RPS4X	X	72255679	72277249	21570	-	5465.1	1316.01	867.74	910.85	2.99841e-08	6.13429e-06	0.54132	-0.885446	-1.84734	639.791	1181.91	-2.05367	-1.66173
RPS4XP1	12	100009052	100009839	787	-	11.6419	3.1507	1.76496	1.94032	0.00186622	0.0119395	0.47296	-1.08021	-2.11435	1.24605	2.63458	-3.1606	-1.41443
RPS4XP13	11	57576292	57577081	789	-	33.0724	9.0102	5.20272	5.51207	0.000240434	0.00290399	0.538149	-0.893922	-1.85822	3.85699	7.16714	-2.39413	-1.44227
RPS4XP2	20	4627758	4685149	57391	-	43.9061	10.1827	6.92882	7.31768	1.94176e-06	0.0001218	0.516903	-0.952035	-1.9346	4.98718	9.64819	-2.28795	-1.63582
RPS4XP3	20	56601701	56602114	413	+	14.0764	3.34696	2.27287	2.34606	0.0126197	0.046035	0.660473	-0.598429	-1.51407	1.86635	2.82577	-2.05448	-1.1158
RPS4Y1	Y	2841602	2932001	90399	+	1191.58	283.792	190.04	198.596	6.19259e-08	1.05576e-05	0.558167	-0.841232	-1.79158	142.282	254.91	-1.99465	-1.60918
RPS5	19	58386400	58394807	8407	+	955.026	228.046	153.431	159.171	0.000215026	0.00268994	1.5996	0.677712	1.5996	195.884	122.458	1.32263	1.93457
RPS7	2	3575260	3580921	5661	+	2467.91	514.805	401.394	411.319	2.88325e-06	0.000152755	0.656957	-0.606129	-1.52217	326.163	496.475	-1.70252	-1.36093
RPS7P1	17	28467822	28468407	585	+	2193.89	477.958	355.626	365.648	1.32469e-07	1.79753e-05	0.629401	-0.66795	-1.58881	282.483	448.812	-1.74146	-1.44954
RPS7P11	17	46721582	46722168	586	-	179.498	39.2991	28.9604	29.9163	4.72907e-07	4.47758e-05	0.60395	-0.727498	-1.65577	22.5293	37.3033	-1.85277	-1.47971
RPS7P4	1	68242474	68243056	582	-	19.7562	4.548	3.20756	3.29271	0.00149368	0.0102847	0.645926	-0.630558	-1.54816	2.58438	4.00104	-1.94897	-1.22978
RRP9	3	51933429	51941905	8476	-	55.3803	12.885	8.87248	9.23005	0.000640252	0.00565344	1.63377	0.708203	1.63377	11.4511	7.00901	1.3	2.05323
RSAD1	17	50478860	50485975	7115	+	219.302	48.4679	35.0341	36.5503	2.0958e-07	2.45412e-05	0.563505	-0.8275	-1.77461	26.3463	46.7544	-1.99875	-1.5756
RSPH3	6	158972871	159000203	27332	-	54.3127	12.2848	8.69646	9.05212	4.48387e-05	0.000955802	0.585327	-0.772686	-1.70845	6.68436	11.4199	-2.06264	-1.41508
RTCA-AS1	1	100251528	100266180	14652	-	22.7392	5.35777	3.6594	3.78987	0.000311888	0.00347361	0.599554	-0.738038	-1.66791	2.84108	4.73865	-2.08098	-1.33683
[truncated: 172 more rows]

## Sheet: Common_in_both_siM_siW
Common_in_siMYCN_siWDR5
ABCC9
[truncated: 309 more rows]

## Sheet: Unique_in_siMYCN
siMYCN_only
[truncated: 1,598 more rows]

[truncated: 1 more sheets: Unique_in_siWDR5]
