# Supplementary material for: MYCN drives oncogenesis by cooperating with the histone methyltransferase G9a and the WDR5 adaptor to orchestrate global gene transcription
Source: PLoS Biol. 2024 Mar 28;22(3):e3002240. doi: 10.1371/journal.pbio.3002240 (PMC11003700; doi:10.1371/journal.pbio.3002240)
Supplement: S7 Table — (XLSX) [file pbio.3002240.s014.xlsx]

## Sheet: IPA_Common-in-siMYCN-siWDR5
Table S7. Ingenuity Pathway Analysis of genes commonly and differentially regulated by MYCN and WDR5 in IMR32 cells.
¬© 2000-2023 QIAGEN. All rights reserved.
Ingenuity Canonical Pathways	-log(p-value)	Molecules
Eukaryotic Translation Elongation	12.2	EEF1G,RPL12,RPL17,RPL22L1,RPL26,RPL32,RPL36,RPL5,RPL7,RPL7A,RPS17,RPS18,RPS3A,RPS4Y1
Eukaryotic Translation Termination	11	RPL12,RPL17,RPL22L1,RPL26,RPL32,RPL36,RPL5,RPL7,RPL7A,RPS17,RPS18,RPS3A,RPS4Y1
Response of EIF2AK4 (GCN2) to amino acid deficiency	10.5	RPL12,RPL17,RPL22L1,RPL26,RPL32,RPL36,RPL5,RPL7,RPL7A,RPS17,RPS18,RPS3A,RPS4Y1
Selenoamino acid metabolism	10.3	RPL12,RPL17,RPL22L1,RPL26,RPL32,RPL36,RPL5,RPL7,RPL7A,RPS17,RPS18,RPS3A,RPS4Y1
SRP-dependent cotranslational protein targeting to membrane	9.91	RPL12,RPL17,RPL22L1,RPL26,RPL32,RPL36,RPL5,RPL7,RPL7A,RPS17,RPS18,RPS3A,RPS4Y1
Nonsense-Mediated Decay (NMD)	9.81	RPL12,RPL17,RPL22L1,RPL26,RPL32,RPL36,RPL5,RPL7,RPL7A,RPS17,RPS18,RPS3A,RPS4Y1
Eukaryotic Translation Initiation	9.58	RPL12,RPL17,RPL22L1,RPL26,RPL32,RPL36,RPL5,RPL7,RPL7A,RPS17,RPS18,RPS3A,RPS4Y1
Major pathway of rRNA processing in the nucleolus and cytosol	8.27	RPL12,RPL17,RPL22L1,RPL26,RPL32,RPL36,RPL5,RPL7,RPL7A,RPS17,RPS18,RPS3A,RPS4Y1,RRP9
EIF2 Signaling	6.25	RPL12,RPL17,RPL22L1,RPL26,RPL32,RPL36,RPL5,RPL7,RPL7A,RPS17,RPS18,RPS3A,RPS4Y1
mTOR Signaling	4.24	PDGFC,PLD5,PPP2R5B,RHOC,RND2,RPS17,RPS18,RPS3A,RPS4Y1,VEGFD
RUNX1 regulates megakaryocyte differentiation and platelet function	3.57	H2AC6,H2BC21,H2BC5,KAT2B,WDR5
Fatty Acid Activation	3.4	ACSF2,ACSL6,SLC27A2
Œ≥-linolenate Biosynthesis II (Animals)	3.09	ACSF2,ACSL6,SLC27A2
Mitochondrial L-carnitine Shuttle Pathway	3.09	ACSF2,ACSL6,SLC27A2
Gustation Pathway	3.03	ABCC9,ADCY5,CACNG5,GABRB2,GABRG3,KCNJ8,P2RX3,PDE3A
B-WICH complex positively regulates rRNA expression	2.76	H2AC6,H2BC21,H2BC5,KAT2B
DNA methylation	2.68	H2AC6,H2BC21,H2BC5
Intrinsic Pathway for Apoptosis	2.67	BAK1,BMF,SEPTIN4,UACA
Activated PKN1 stimulates transcription of AR regulated genes KLK2 and KLK3	2.58	H2AC6,H2BC21,H2BC5
Glutathione Redox Reactions I	2.58	GPX3,GPX8,MGST1
Signaling by ERBB4	2.56	APH1B,GABRB2,GABRG3,YAP1
SIRT1 negatively regulates rRNA expression	2.54	H2AC6,H2BC21,H2BC5
Hepatic Fibrosis / Hepatic Stellate Cell Activation	2.49	COL1A1,COL6A1,FAS,PDGFC,SMAD3,TGFA,VEGFD
Potassium Channels	2.44	ABCC9,HCN3,HCN4,KCNG3,KCNJ8
RAR Activation	2.41	ADCY5,ALDH1A3,COL1A1,KAT2B,PDE3A,RET,RHOC,RND2,RPL7A,SMAD3,STRA6
ILK Signaling	2.39	FLNC,PARVA,PDGFC,PPP2R5B,RHOC,RND2,VEGFD
Fatty Acid Œ≤-oxidation I	2.34	ACSF2,ACSL6,SLC27A2
Oxytocin in Spinal Neurons Signaling Pathway	2.31	ABCC9,KCNJ8,NPR1
PRC2 methylates histones and DNA	2.31	H2AC6,H2BC21,H2BC5
O-linked glycosylation	2.3	GALNT12,GALNT4,GALNT6,GCNT1,THSD7A
Detoxification of Reactive Oxygen Species	2.24	GPX3,GPX8,TXN
ERCC6 (CSB) and EHMT2 (G9a) positively regulate rRNA expression	2.24	H2AC6,H2BC21,H2BC5
Amyloid fiber formation	2.23	APH1B,H2AC6,H2BC21,H2BC5
NoRC negatively regulates rRNA expression	2.21	H2AC6,H2BC21,H2BC5
ESR-mediated signaling	2.19	H2AC6,H2BC21,H2BC5,KAT2B,TGFA
Pre-NOTCH Expression and Processing	2.16	H2AC6,H2BC21,H2BC5,KAT2B
Nitric Oxide Signaling in the Cardiovascular System	2.13	BDKRB2,CACNG5,NPR1,PDGFC,VEGFD
Thrombin Signaling	2.12	ADCY5,ARHGEF26,ARHGEF28,CAMK1,MYLK,RHOC,RND2
Formation of axial mesoderm	2.09	SMAD3,YAP1
Activation of anterior HOX genes in hindbrain during early embryogenesis	2.07	H2AC6,H2BC21,H2BC5,WDR5
BEX2 Signaling Pathway	2.05	BAK1,PDGFC,PPP2R5B,VEGFD
Pancreatic Adenocarcinoma Signaling	2.05	PDGFC,PLD5,SMAD3,TGFA,VEGFD
YAP1- and WWTR1 (TAZ)-stimulated gene expression	2.03	KAT2B,YAP1
Cardiac conduction	2.02	ABCC9,ATP2B4,FKBP1B,KAT2B,NPR1
Sulfite Oxidation IV	2.01	SUOX
Hepatic Fibrosis Signaling Pathway	2	CACNG5,COL1A1,ITGA6,MYLK,PDGFC,RHOC,RND2,SMAD3,VEGFD,YAP1
Regulation of eIF4 and p70S6K Signaling	1.98	ITGA6,PPP2R5B,RPS17,RPS18,RPS3A,RPS4Y1
Oxidative Stress Induced Senescence	1.98	H2AC6,H2BC21,H2BC5,TXN
Molecular Mechanisms of Cancer	1.94	ADCY5,ADGRG1,ADGRG6,APH1B,BAK1,BDKRB2,FAS,GPR155,IL12RB2,ITGA6,PROKR1,PTGFR,RHOC,RND2,SMAD3,TGFA
Meiotic recombination	1.92	H2AC6,H2BC21,H2BC5
GABAergic Receptor Signaling Pathway (Enhanced)	1.9	ADCY5,CACNG5,GABRB2,GABRG3,NLGN3
Nucleosome assembly	1.9	H2AC6,H2BC21,H2BC5
Apelin Adipocyte Signaling Pathway	1.9	ADCY5,GPX3,GPX8,MGST1
Transcriptional regulation of granulopoiesis	1.85	H2AC6,H2BC21,H2BC5
FOXO-mediated transcription	1.83	KAT2B,TXN
Signaling by TGF-beta Receptor Complex	1.81	LTBP1,LTBP2,SMAD3
Breast Cancer Regulation by Stathmin1	1.8	ADGRG1,ADGRG6,BDKRB2,CAMK1,GPR155,PDGFC,PPP2R5B,PROKR1,PTGFR,TGFA,TUBB3,VEGFD
Coronavirus Pathogenesis Pathway	1.79	RIGI,RPS17,RPS18,RPS3A,RPS4Y1,SMAD3
Dilated Cardiomyopathy Signaling Pathway	1.77	ABCC9,ADCY5,CACNG5,CAMK1,PDE3A
Cellular Effects of Sildenafil (Viagra)	1.77	ADCY5,CACNG5,MYLK,NPR1,PDE3A
Meiotic synapsis	1.77	H2AC6,H2BC21,H2BC5
Transcriptional regulation by RUNX1	1.75	H2AC6,H2BC21,H2BC5,PCGF5,YAP1
DNA Damage/Telomere Stress Induced Senescence	1.74	H2AC6,H2BC21,H2BC5
Sumoylation Pathway	1.72	FAS,RHOC,RND2,SERBP1
Colorectal Cancer Metastasis Signaling	1.72	ADCY5,DCC,PDGFC,RHOC,RND2,SMAD3,VEGFD
Integrin Signaling	1.7	ITGA6,MYLK,NEDD9,PARVA,RHOC,RND2
GABA receptor activation	1.67	ADCY5,GABRB2,GABRG3
Assembly of collagen fibrils and other multimeric structures	1.65	COL1A1,COL6A1,ITGA6
Tumoricidal Function of Hepatic Natural Killer Cells	1.63	DFFA,FAS
Oxytocin Signaling Pathway	1.63	ABCC9,ATP2B4,CACNG5,KCNJ8,MYLK,NPR1,PTGFR
G-Protein Coupled Receptor Signaling	1.63	ADCY5,ADGRG1,ADGRG6,BDKRB2,GPR155,HCN3,HCN4,MYLK,PDE3A,PROKR1,PTGFR,RGS4,YAP1
Induction of Apoptosis by HIV1	1.58	BAK1,DFFA,FAS
Regulation of Actin-based Motility by Rho	1.56	ITGA6,MYLK,RHOC,RND2
Neurovascular Coupling Signaling Pathway	1.55	BDKRB2,CACNG5,GABRB2,GABRG3,KCNJ8,NPR1
Syndecan interactions	1.54	COL1A1,ITGA6
Fatty acyl-CoA biosynthesis	1.54	ACSL6,SLC27A2
Apelin Liver Signaling Pathway	1.54	COL1A1,FAS
Methylglyoxal Degradation I	1.53	GLO1
Amyotrophic Lateral Sclerosis Signaling	1.53	CACNG5,PDGFC,PRPH,VEGFD
Sphingosine-1-phosphate Signaling	1.48	ADCY5,PDGFC,RHOC,RND2
EGR2 and SOX10-mediated initiation of Schwann cell myelination	1.48	ADGRG6,YAP1
Stearate Biosynthesis I (Animals)	1.48	ACSF2,ACSL6,SLC27A2
FOXO-mediated transcription of oxidative stress, metabolic and neuronal genes	1.45	PLXNA4,SMAD3
RHO GTPase cycle	1.45	ARHGAP29,ARHGEF26,ARHGEF28,CCT7,NHS,RHOC,RND2,SNAP23,UACA
Telomere Maintenance	1.45	H2AC6,H2BC21,H2BC5
Senescence-Associated Secretory Phenotype (SASP)	1.45	H2AC6,H2BC21,H2BC5
Wound Healing Signaling Pathway	1.4	COL1A1,COL6A1,ITGA6,PDGFC,TGFA,VEGFD
Signaling by NOTCH1	1.37	APH1B,CNTN1,KAT2B
GABA Receptor Signaling	1.37	ADCY5,CACNG5,GABRB2,GABRG3
LPS/IL-1 Mediated Inhibition of RXR Function	1.37	ACSF2,ACSL6,ALDH1A3,HS3ST4,MGST1,SLC27A2
Maturity Onset Diabetes of Young (MODY) Signaling	1.36	ABCC9,CACNG5,KCNJ8
Role of JAK family kinases in IL-6-type Cytokine Signaling	1.36	PDGFC,VEGFD,VIP
Xenobiotic Metabolism CAR Signaling Pathway	1.36	ALDH1A3,HS3ST4,MGST1,PPP2R5B,RACK1
Signaling by NOTCH2	1.35	APH1B,CNTN1
Deubiquitination	1.33	H2AC6,H2BC21,H2BC5,KAT2B,RIGI,SMAD3
FasL/ CD95L signaling	1.31	FAS
Creatine-phosphate Biosynthesis	1.31	CKMT1A/CKMT1B
Signaling by NOTCH4	1.31	APH1B,KAT2B,SMAD3
Signaling by Rho Family GTPases	1.29	ITGA6,MAP3K21,MYLK,RHOC,RND2,SEPTIN4
Integrin cell surface interactions	1.28	COL1A1,COL6A1,ITGA6
Protein Kinase A Signaling	1.28	ADCY5,DCC,FLNC,MYLK,PDE3A,PTPN14,PYGL,SMAD3
Platelet homeostasis	1.27	ATP2B4,P2RX3,PPP2R5B
HIPPO signaling	1.27	PPP2R5B,SMAD3,YAP1
Superpathway of Methionine Degradation	1.27	EEF1AKMT4,SUOX
Notch Signaling	1.27	APH1B,CNTN1
HIF1Œ± Signaling	1.23	CAMK1,PDGFC,RACK1,TGFA,VEGFD
IL-8 Signaling	1.22	PDGFC,PLD5,RHOC,RND2,VEGFD
Cell junction organization	1.2	FLNC,ITGA6,PARVA
Formation of WDR5-containing histone-modifying complexes	1.19	KAT2B,WDR5
Actin Nucleation by ARP-WASP Complex	1.19	ITGA6,RHOC,RND2
Type II Diabetes Mellitus Signaling	1.18	ACSF2,ACSL6,CACNG5,SLC27A2
Thioredoxin Pathway	1.17	TXN
Gene Silencing by RNA	1.17	H2AC6,H2BC21,H2BC5
Transcriptional regulation by RUNX3	1.16	KAT2B,SMAD3,YAP1
Elastic fibre formation	1.15	LTBP1,LTBP2
Collagen chain trimerization	1.15	COL1A1,COL6A1
eNOS Signaling	1.14	ADCY5,BDKRB2,PDGFC,VEGFD
Protein folding	1.13	CCT4,CCT7,TUBB3
Microautophagy Signaling Pathway	1.13	COL1A1,COL6A1,RETREG1,VPS28
G alpha (z) signalling events	1.09	ADCY5,RGS4
Mitotic Prophase	1.08	H2AC6,H2BC21,H2BC5
S100 Family Signaling Pathway	1.08	ADGRG1,ADGRG6,AHNAK,BDKRB2,CACNG5,GPR155,PDGFC,PROKR1,PTGFR,SMAD3,TGFA,VEGFD
DNA Replication Pre-Initiation	1.07	H2AC6,H2BC21,H2BC5
Apoptosis Signaling	1.07	BAK1,DFFA,FAS
Nonhomologous End-Joining (NHEJ)	1.07	H2BC21,H2BC5
RHO GTPases Activate Rhotekin and Rhophilins	1.07	RHOC
OAS antiviral response	1.07	RIGI
Osteoarthritis Pathway	1.07	H19,ITGA6,PDGFC,SMAD3,VEGFD
Signaling by NOTCH3	1.06	APH1B,KAT2B
Extracellular matrix organization	1.06	COL1A1,COL6A1,ITGA6
Transcriptional regulation by RUNX2	1.04	COL1A1,YAP1
Amyloid Processing	1.04	APH1B,BACE2
Germ Cell-Sertoli Cell Junction Signaling	1.04	ITGA6,RHOC,RND2,TUBB3
GŒ±q Signaling	1.04	PLD5,RGS4,RHOC,RND2
Apoptotic execution phase	1.03	DFFA,STK26
Caspase activation via Dependence Receptors in the absence of ligand	1.02	DCC
Calcium Transport I	1.02	ATP2B4
G alpha (q) signalling events	1.02	BDKRB2,PROKR1,PTGFR,RGS4
Serotonin Receptor Signaling	1.01	ADCY5,CACNG5,HTR3A,MYLK,PLD5,RHOC,RND2,YAP1
Neurotransmitter receptors and postsynaptic signal transmission	0.985	HTR3A
Glycogen Degradation II	0.985	PYGL
Cardiac Œ≤-adrenergic Signaling	0.984	ADCY5,CACNG5,PDE3A,PPP2R5B
Tumor Microenvironment Pathway	0.978	COL1A1,FAS,PDGFC,VEGFD
Docosahexaenoic Acid (DHA) Signaling	0.977	ADCY5,APH1B,FAS,SYT2,TGFA
CDK5 Signaling	0.976	ADCY5,ITGA6,PPP2R5B
Glutaminergic Receptor Signaling Pathway (Enhanced)	0.972	ADCY5,CACNG5,GABRB2,GABRG3,PLD5,SLC7A11
Pulmonary Fibrosis Idiopathic Signaling Pathway	0.967	COL1A1,COL6A1,PDGFC,SMAD3,TGFA,YAP1
Myelination Signaling Pathway	0.967	ADGRG6,APH1B,ITGA6,MYRF,PDGFC,SMAD3
Neurexins and neuroligins	0.962	NLGN3,SYT2
TNF signaling	0.962	OPTN,RACK1
Signaling by PDGF	0.95	COL6A1,PDGFC
GP1b-IX-V activation signalling	0.949	COL1A1
Dopamine-DARPP32 Feedback in cAMP Signaling	0.946	ADCY5,CACNG5,KCNJ8,PPP2R5B
PAK Signaling	0.943	ITGA6,MYLK,PDGFC
DNA Double Strand Break Response	0.937	H2BC21,H2BC5
Platelet Aggregation (Plug Formation)	0.917	COL1A1
Dissolution of Fibrin Clot	0.917	SERPINB6
Glycogen Degradation III	0.917	PYGL
Collagen degradation	0.913	COL1A1,COL6A1
NCAM signaling for neurite out-growth	0.913	CNTN2,COL6A1
Semaphorin Signaling in Neurons	0.913	RHOC,RND2
Role of JAK2 in Hormone-like Cytokine Signaling	0.902	PDGFC,VEGFD
L1CAM interactions	0.896	CNTN1,CNTN2,TUBB3
Circadian Rhythm Signaling	0.894	ADCY5,CACNG5,NPR1,RACK1,VIP
Phenylalanine Degradation IV (Mammalian, via Side Chain)	0.887	SLC27A2
Mitochondrial Dysfunction	0.883	APH1B,BACE2,CACNG5,GPX3,GPX8,MGST1
ROBO SLIT Signaling Pathway	0.881	DCC,PDGFC,VEGFD
Glioma Signaling	0.881	CAMK1,PDGFC,TGFA
Semaphorin interactions	0.88	PLXNA4,RHOC
TCF dependent signaling in response to WNT	0.869	H2AC6,H2BC21,H2BC5,PPP2R5B
TR/RXR Activation	0.86	PDGFC,SYT2,VEGFD
Signaling by Activin	0.859	SMAD3
Platelet Adhesion to exposed collagen	0.859	COL1A1
Choline Biosynthesis III	0.859	PLD5
Ferroptosis Signaling Pathway	0.853	H2BC5,SLC7A11,YAP1
Collagen biosynthesis and modifying enzymes	0.848	COL1A1,COL6A1
ID1 Signaling Pathway	0.847	PDGFC,RHOC,SMAD3,VEGFD
Response to elevated platelet cytosolic Ca2+	0.845	CD9,LGALS3BP,VEGFD
Cell Cycle: G1/S Checkpoint Regulation	0.837	RPL5,SMAD3
Caspase activation via Death Receptors in the presence of ligand	0.833	FAS
Granzyme B Signaling	0.833	DFFA
STAT3 Pathway	0.825	IL12RB2,MAP3K21,TGFA
CREB Signaling in Neurons	0.821	ADCY5,ADGRG1,ADGRG6,BDKRB2,CACNG5,GPR155,PROKR1,PTGFR,TGFA
SNARE Signaling Pathway	0.818	ADCY5,SNAP23,SYT2
Role of PKR in Interferon Induction and Antiviral Response	0.818	FAS,PDGFC,RIGI
ERBB4 Signaling	0.817	APH1B,YAP1
Role of Tissue Factor in Cancer	0.814	FLNC,ITGA6,PPP2R5B,TGFA
FOXO-mediated transcription of cell cycle genes	0.808	SMAD3
Germ layer formation at gastrulation	0.808	SMAD3
Translocation of SLC2A4 (GLUT4) to the plasma membrane	0.808	SNAP23,TUBB3
White Adipose Tissue Browning Pathway	0.805	ADCY5,CACNG5,NPR1
RHO GTPases Activate Formins	0.798	PPP2R5B,RHOC,TUBB3
PIP3 activates AKT signaling	0.792	PIK3AP1,PPP2R5B,TGFA
Pathogen Induced Cytokine Storm Signaling Pathway	0.788	COL1A1,COL6A1,IL12RB2,PDGFC,RIGI,VEGFD
Formation of definitive endoderm	0.786	SMAD3
MSP-RON Signaling in Cancer Cells Pathway	0.779	ITGA6,PDGFC,VEGFD
Caveolar-mediated Endocytosis Signaling	0.77	FLNC,ITGA6
Glioma Invasiveness Signaling	0.77	RHOC,RND2
GPCR-Mediated Integration of Enteroendocrine Signaling Exemplified by an L Cell	0.77	ADCY5,VIP
Xenobiotic Metabolism Signaling	0.768	ALDH1A3,CAMK1,HS3ST4,MGST1,PPP2R5B
RHO GTPases activate CIT	0.764	RHOC
RHO GTPases Activate ROCKs	0.764	RHOC
Metabolism of cofactors	0.764	GCHFR
NFE2L2 regulating anti-oxidant/detoxification enzymes	0.764	SLC7A11
G alpha (s) signalling events	0.761	ADCY5,PDE3A,VIP
Calcium Signaling	0.759	ATP2B4,CACNG5,CAMK1,HTR3A
Leptin Signaling in Obesity	0.753	ADCY5,PDE3A
Signaling by Hippo	0.744	YAP1
Interleukin-12 family signaling	0.744	IL12RB2
Endocannabinoid Cancer Inhibition Pathway	0.737	ADCY5,PDGFC,VEGFD
G alpha (12/13) signalling events	0.727	ARHGEF26,RHOC
Dopamine Receptor Signaling	0.727	ADCY5,PPP2R5B
RHO GTPases activate PAKs	0.725	MYLK
Histamine Degradation	0.725	ALDH1A3
Fatty Acid Œ±-oxidation	0.725	ALDH1A3
Corticotropin Releasing Hormone Signaling	0.72	ADCY5,CACNG5,NPR1
Neutrophil degranulation	0.714	MGST1,NPC2,PYGL,RAB31,SERPINB6,SLC27A2,SNAP23
PI Metabolism	0.711	PLEKHA2,PLEKHA6
Cellular hexose transport	0.707	SLC45A3
Peroxisomal lipid metabolism	0.707	SLC27A2
Interconversion of nucleotide di- and triphosphates	0.707	TXN
Pregnenolone Biosynthesis	0.707	MICAL2
Putrescine Degradation III	0.707	ALDH1A3
Activation of NMDA receptors and postsynaptic events	0.695	CAMK1,TUBB3
Relaxin Signaling	0.692	ADCY5,NPR1,PDE3A
Signaling by NODAL	0.69	SMAD3
Formation of paraxial mesoderm	0.69	KAT2B
Histidine Degradation VI	0.69	MICAL2
Methionine Degradation I (to Homocysteine)	0.69	EEF1AKMT4
Vitamin-C Transport	0.69	TXN
cAMP-mediated signaling	0.686	ADCY5,CAMK1,PDE3A,RGS4
Aryl Hydrocarbon Receptor Signaling	0.681	ALDH1A3,FAS,MGST1
Neuroinflammation Signaling Pathway	0.679	APH1B,BACE2,FAS,GABRB2,GABRG3
Sulfur amino acid metabolism	0.673	SUOX
Regulation of RUNX1 Expression and Activity	0.673	H19
Glycogen metabolism	0.673	PYGL
Xenobiotic Metabolism AHR Signaling Pathway	0.673	ALDH1A3,MGST1
Ethanol Degradation IV	0.658	ALDH1A3
Cysteine Biosynthesis III (mammalia)	0.658	EEF1AKMT4
Phagosome Maturation	0.655	CTSO,TUBB3,VPS28
Role of Osteoblasts in Rheumatoid Arthritis Signaling Pathway	0.645	COL1A1,CTSO,PDGFC,VEGFD
Fertilization	0.643	CD9
Ubiquinol-10 Biosynthesis (Eukaryotic)	0.643	MICAL2
ABRA Signaling Pathway	0.637	PDGFC,VEGFD
HMGB1 Signaling	0.63	KAT2B,RHOC,RND2
Androgen Signaling	0.63	CACNG5,KAT2B,SMAD3
Pyroptosis	0.628	BAK1
Tryptophan Degradation X (Mammalian, via Tryptamine)	0.628	ALDH1A3
CXCR4 Signaling	0.626	ADCY5,RHOC,RND2
EPH-Ephrin signaling	0.623	APH1B,ARHGEF28
RHO GTPases activate PKNs	0.615	RHOC
Glioblastoma Multiforme Signaling	0.611	PDGFC,RHOC,RND2
Prolactin Signaling	0.61	ABCC9,KCNJ8
Death Receptor Signaling	0.61	DFFA,FAS
Netrin Signaling	0.602	CACNG5,DCC,DRAXIN
Phagosome Formation	0.596	ADGRG1,ADGRG6,BDKRB2,GPR155,ITGA6,MYLK,PLD5,PROKR1,PTGFR
p53 Signaling	0.585	FAS,KAT2B
p75 NTR receptor-mediated signalling	0.585	APH1B,ARHGEF26
Cardiac Hypertrophy Signaling	0.584	ADCY5,CACNG5,RHOC,RND2
VEGF Signaling	0.579	PDGFC,VEGFD
Bile acid and bile salt metabolism	0.576	SLC27A2
RHO GTPases activate IQGAPs	0.576	TUBB3
Endosomal Sorting Complex Required For Transport (ESCRT)	0.576	VPS28
Sonic Hedgehog Signaling	0.576	DYRK1B
RIPK1-mediated regulated necrosis	0.565	FAS
Dopamine Degradation	0.565	ALDH1A3
Transport of inorganic cations/anions and amino acids/oligopeptides	0.561	SLC24A2,SLC7A11
Cargo recognition for clathrin-mediated endocytosis	0.544	SYT2,TGFA
Gap junction trafficking and regulation	0.542	TUBB3
Cargo concentration in the ER	0.542	TGFA
Late endosomal microautophagy	0.542	VPS28
MicroRNA Biogenesis Signaling Pathway	0.542	SMAD3,TGFA,YAP1
Insulin Secretion Signaling Pathway	0.535	ABCC9,ADCY5,CACNG5,KCNJ8
Œ±-Adrenergic Signaling	0.533	ADCY5,PYGL
Paxillin Signaling	0.533	ITGA6,PARVA
PD-1, PD-L1 cancer immunotherapy pathway	0.533	SMAD3,YAP1
GPVI-mediated activation cascade	0.532	COL1A1
Transcriptional Regulation by NPAS4	0.532	RET
Coagulation System	0.532	BDKRB2
Ethanol Degradation II	0.532	ALDH1A3
Production of Nitric Oxide and Reactive Oxygen Species in Macrophages	0.526	PPP2R5B,RHOC,RND2
Opioid Signaling Pathway	0.522	ADCY5,CACNG5,CAMK1,RGS4
Regulation of the Epithelial Mesenchymal Transition by Growth Factors Pathway	0.522	PDGFC,SMAD3,YAP1
Transcriptional regulation by the AP-2 (TFAP2) family of transcription factors	0.522	TGFA
Interferon Signaling	0.522	BAK1
Xenobiotic Metabolism PXR Signaling Pathway	0.518	ALDH1A3,HS3ST4,MGST1
Hedgehog 'off' state	0.517	ADCY5,TUBB3
HDR through Homologous Recombination (HRR) or Single Strand Annealing (SSA)	0.517	H2BC21,H2BC5
Acetylcholine Receptor Signaling Pathway	0.514	ADCY5,APH1B,CACNG5
Endothelin-1 Signaling	0.514	ADCY5,NPR1,PLD5
Noradrenaline and Adrenaline Degradation	0.512	ALDH1A3
Antioxidant Action of Vitamin C	0.507	PLD5,TXN
Synaptic Long Term Depression	0.506	CACNG5,NPR1,PPP2R5B
Pulmonary Healing Signaling Pathway	0.503	PDGFC,VEGFD,YAP1
Cell Cycle Regulation by BTG Family Proteins	0.502	PPP2R5B
Glutathione-mediated Detoxification	0.502	MGST1
Gap Junction Signaling	0.499	ADCY5,NPR1,TUBB3
PI3K/AKT Signaling	0.499	IL12RB2,ITGA6,PPP2R5B
Bladder Cancer Signaling	0.497	PDGFC,VEGFD
Adrenomedullin signaling pathway	0.495	ADCY5,MYLK,NPR1
Neuregulin Signaling	0.492	ITGA6,TGFA
Ephrin Receptor Signaling	0.492	ITGA6,PDGFC,VEGFD
GPCR-Mediated Nutrient Sensing in Enteroendocrine Cells	0.487	ADCY5,CACNG5
Cholecystokinin/Gastrin-mediated Signaling	0.483	RHOC,RND2
DAG and IP3 signaling	0.475	ADCY5
RET signaling	0.475	RET
Mechanisms of Viral Exit from Host Cells	0.475	VPS28
Regulation of beta-cell development	0.467	KAT2B
Intrinsic Prothrombin Activation Pathway	0.467	COL1A1
Cell surface interactions at the vascular wall	0.46	COL1A1,ITGA6,SLC7A11
Senescence Pathway	0.46	CACNG5,KAT2B,PPP2R5B,SMAD3
RHOA Signaling	0.459	MYLK,SEPTIN4
Th1 Pathway	0.459	APH1B,IL12RB2
Vasopressin regulates renal water homeostasis via Aquaporins	0.459	ADCY5
Smooth Muscle Contraction	0.459	MYLK
Assembly and cell surface presentation of NMDA receptors	0.459	TUBB3
Aggrephagy	0.459	TUBB3
Retinoate Biosynthesis I	0.459	ALDH1A3
Regulation of mRNA stability by proteins that bind AU-rich elements	0.451	ENPP2
Signaling by Retinoic Acid	0.451	ALDH1A3
TP53 Regulates Transcription of Cell Death Genes	0.451	FAS
TBC/RABGAPs	0.451	OPTN
Retinoid metabolism and transport	0.451	LRP10
MHC class II antigen presentation	0.451	CTSO,TUBB3
Arachidonic acid metabolism	0.443	PON2
Carboxyterminal post-translational modifications of tubulin	0.443	TUBB3
GPER1 signaling	0.443	ADCY5
Coronavirus Replication Pathway	0.443	TUBB3
Interleukin-1 family signaling	0.442	PTPN14,SMAD3
Autophagy	0.44	OPTN,PPP2R5B,TGFA
14-3-3-mediated Signaling	0.438	TUBB3,YAP1
GP6 Signaling Pathway	0.438	COL1A1,COL6A1
Role of RIG1-like Receptors in Antiviral Innate Immunity	0.435	RIGI
tRNA Splicing	0.435	PDE3A
Role of Osteoclasts in Rheumatoid Arthritis Signaling Pathway	0.435	COL1A1,COL6A1,RHOC,RND2
Clathrin-mediated endocytosis	0.433	SYT2,TGFA
RHOGDI Signaling	0.431	ITGA6,RHOC,RND2
Atherosclerosis Signaling	0.421	COL1A1,PDGFC
XBP1(S) activates chaperone genes	0.421	PPP2R5B
nNOS Signaling in Skeletal Muscle Cells	0.421	CACNG5
IL-23 Signaling Pathway	0.421	IL12RB2
Transcriptional activity of SMAD2/SMAD3:SMAD4 heterotrimer	0.414	SMAD3
Role of NFAT in Cardiac Hypertrophy	0.412	ADCY5,CACNG5,CAMK1
Signaling by EGFR	0.407	TGFA
Netrin-1 signaling	0.407	DCC
RNA Polymerase I Transcription	0.407	KAT2B
MYC Mediated Apoptosis Signaling	0.407	FAS
Dermatan Sulfate Biosynthesis (Late Stages)	0.407	HS3ST4
Cell Cycle: G2/M DNA Damage Checkpoint Regulation	0.407	KAT2B
FAT10 Cancer Signaling Pathway	0.407	SMAD3
Adipogenesis pathway	0.398	KAT2B,SMAD3
Th2 Pathway	0.398	APH1B,IL12RB2
Reelin Signaling in Neurons	0.394	ARHGEF26,ARHGEF28
GŒ±i Signaling	0.394	ADCY5,RGS4
Role of Chondrocytes in Rheumatoid Arthritis Signaling Pathway	0.39	PDGFC,VEGFD
Chondroitin Sulfate Biosynthesis (Late Stages)	0.388	HS3ST4
Apelin Endothelial Signaling Pathway	0.383	ADCY5,SMAD3
Phototransduction Pathway	0.381	NPR1
IL-12 Signaling and Production in Macrophages	0.381	COL1A1,IL12RB2,RIGI
Sertoli Cell-Germ Cell Junction Signaling Pathway (Enhanced)	0.378	ITGA6,PPP2R5B,SMAD3
The citric acid (TCA) cycle and respiratory electron transport	0.375	GLO1
HSP90 chaperone cycle for steroid hormone receptors in the presence of ligand	0.375	TUBB3
E3 ubiquitin ligases ubiquitinate target proteins	0.375	H2BC5
Sensory processing of sound by outer hair cells of the cochlea	0.375	CIB2
NRF2-mediated Oxidative Stress Response	0.375	CCT7,MGST1,TXN
NLR signaling pathways	0.37	TXN
Oxidative Ethanol Degradation III	0.37	ALDH1A3
Endocannabinoid Neuronal Synapse Pathway	0.362	ADCY5,CACNG5
Actin Cytoskeleton Signaling	0.359	ITGA6,MYLK,PDGFC
Role of CHK Proteins in Cell Cycle Checkpoint Control	0.358	PPP2R5B
Metabolism of water-soluble vitamins and cofactors	0.353	ENPP2
NAD Signaling Pathway	0.352	H2BC5,TGFA
Pancreatic Secretion Signaling Pathway	0.349	ADCY5,ATP2B4,VIP
Visual phototransduction	0.347	STRA6
GADD45 Signaling	0.347	SMAD3
SPINK1 Pancreatic Cancer Pathway	0.347	SMAD3
Cardiac Hypertrophy Signaling (Enhanced)	0.346	ADCY5,CACNG5,IL12RB2,ITGA6,NPR1,PDE3A
Necroptosis Signaling Pathway	0.343	FAS,PYGL
Kinesins	0.342	TUBB3
Chondroitin Sulfate Biosynthesis	0.342	HS3ST4
Epithelial Adherens Junction Signaling	0.333	PPP2R5B,YAP1
Peroxisomal protein import	0.332	SLC27A2
Dermatan Sulfate Biosynthesis	0.332	HS3ST4
Ovarian Cancer Signaling	0.327	PDGFC,VEGFD
G alpha (i) signalling events	0.325	ADCY5,BDKRB2,RGS4
RAB geranylgeranylation	0.322	RAB31
Activation of IRF by Cytosolic Pattern Recognition Receptors	0.322	RIGI
RAF/MAP kinase cascade	0.318	PPP2R5B,RET,TGFA
Degradation of the extracellular matrix	0.318	SCUBE3
Mitotic Roles of Polo-Like Kinase	0.313	PPP2R5B
HOTAIR Regulatory Pathway	0.313	COL1A1,RHOC
Remodeling of Epithelial Adherens Junctions	0.308	TUBB3
Sensory processing of sound by inner hair cells of the cochlea	0.304	CIB2
Phospholipases	0.304	PLD5
Eicosanoid Signaling	0.3	PTGFR
Cell Cycle Checkpoints	0.296	H2BC21,H2BC5,PPP2R5B
ISG15 antiviral mechanism	0.295	RIGI
COPII-mediated vesicle transport	0.291	TGFA
GM-CSF Signaling	0.291	RACK1
Aldosterone Signaling in Epithelial Cells	0.288	ABCC9,KCNJ8
WNT/Œ≤-catenin Signaling	0.288	DKK3,PPP2R5B
Th1 and Th2 Activation Pathway	0.288	APH1B,IL12RB2
Extra-nuclear estrogen signaling	0.287	TGFA
Serotonin Degradation	0.287	ALDH1A3
trans-Golgi Network Vesicle Budding	0.283	SNAP23
Protein Sorting Signaling Pathway	0.278	ADCY5,PLD5
Plasma lipoprotein assembly, remodeling, and clearance	0.275	NPC2
Tight Junction Signaling	0.273	MYLK,PPP2R5B
GDNF Family Ligand-Receptor Interactions	0.272	RET
Macropinocytosis Signaling	0.272	PDGFC
Costimulation by the CD28 family	0.268	PPP2R5B
Ion channel transport	0.266	ATP2B4,FKBP1B
DDX58/IFIH1-mediated induction of interferon-alpha/beta	0.264	RIGI
Signaling by MET	0.264	COL1A1
Antiproliferative Role of Somatostatin Receptor 2	0.264	NPR1
Thyroid Cancer Signaling	0.264	RET
NF-Œ∫B Activation by Viruses	0.261	ITGA6
IL-7 Signaling Pathway	0.261	BAK1
Renal Cell Carcinoma Signaling	0.257	TGFA
Chemokine Signaling	0.257	CAMK1
IL-17 Signaling	0.252	PDGFC,VEGFD
Transport of bile salts and organic acids, metal ions and amine compounds	0.25	SLC41A2
Heparan Sulfate Biosynthesis (Late Stages)	0.25	HS3ST4
GNRH Signaling	0.248	ADCY5,CACNG5
Cyclins and Cell Cycle Regulation	0.244	PPP2R5B
PPARŒ±/RXRŒ± Activation	0.241	ADCY5,SMAD3
Role of Hypercytokinemia/hyperchemokinemia in the Pathogenesis of Influenza	0.24	RIGI
VEGF Family Ligand-Receptor Interactions	0.24	VEGFD
PEDF Signaling	0.24	FAS
IL-17A Signaling in Fibroblasts	0.237	COL1A1
Regulation of the Epithelial Mesenchymal Transition in Development Pathway	0.237	APH1B
Regulation of the Epithelial-Mesenchymal Transition Pathway	0.235	APH1B,SMAD3
TP53 Regulates Metabolic Genes	0.234	TXN
Mitotic G2-G2/M phases	0.231	OPTN,TUBB3
RAB GEFs exchange GTP for GDP on RABs	0.231	RAB31
PDGF Signaling	0.231	PDGFC
Natural Killer Cell Signaling	0.229	COL1A1,IL12RB2
Adrenergic Receptor Signaling Pathway (Enhanced)	0.229	ADCY5,CACNG5
Immunogenic Cell Death Signaling Pathway	0.228	BAK1
Opioid Signalling	0.228	ADCY5
Heparan Sulfate Biosynthesis	0.228	HS3ST4
Regulation of Cellular Mechanics by Calpain Protease	0.228	ITGA6
Unfolded protein response	0.228	AMFR
Cilium Assembly	0.227	CCT4,TUBB3
Degradation of beta-catenin by the destruction complex	0.225	PPP2R5B
Crosstalk between Dendritic Cells and Natural Killer Cells	0.225	FAS
Pyroptosis Signaling Pathway	0.219	GAS5
Ceramide Signaling	0.219	PPP2R5B
FcŒ≥ Receptor-mediated Phagocytosis in Macrophages and Monocytes	0.216	PLD5
Class B/2 (Secretin family receptors)	0.214	VIP
ERBB Signaling	0.214	TGFA
Non-Small Cell Lung Cancer Signaling	0.211	TGFA
IL-1 Signaling	0.211	ADCY5
TGF-Œ≤ Signaling	0.211	SMAD3
Melanocyte Development and Pigmentation Signaling	0.2	ADCY5
ATM Signaling	0.2	PPP2R5B
ABC-family proteins mediated transport	0.198	ABCC9
Apelin Cardiomyocyte Signaling Pathway	0.198	MYLK
Oxytocin in Brain Signaling Pathway	0	CACNG5
CLEAR Signaling Pathway	0	PPP2R5B,TGFA
Multiple Sclerosis Signaling Pathway	0	FAS,GAS5
Glucocorticoid Receptor Signaling	0	IL12RB2,KAT2B,SMAD3
Neutrophil Extracellular Trap Signaling Pathway	0	COL1A1,COL6A1
Axonal Guidance Signaling	0	DCC,ITGA6,PDGFC,TUBB3,VEGFD
Chaperone Mediated Autophagy Signaling Pathway	0	KAT2B
IL-33 Signaling Pathway	0	H2BC5
NOD1/2 Signaling Pathway	0	RIGI
Activin Inhibin Signaling Pathway	0	COL1A1,SMAD3
DHCR24 Signaling Pathway	0	PDGFC
WNK Renal Signaling Pathway	0	AMFR
Cachexia Signaling Pathway	0	ADCY5,SMAD3
ISGylation Signaling Pathway	0	RIGI
Orexin Signaling Pathway	0	ADCY5,CACNG5
Integration of energy metabolism	0	ADCY5
Signaling by VEGF	0	VEGFD
Immunoregulatory interactions between a Lymphoid and a non-Lymphoid cell	0	COL1A1
Generic Transcription Pathway	0	KAT2B,ZNF34,ZNF600
Binding and Uptake of Ligands by Scavenger Receptors	0	COL1A1
Mitotic Metaphase and Anaphase	0	PPP2R5B,TUBB3
Class A/1 (Rhodopsin-like receptors)	0	BDKRB2,PROKR1,PTGFR
Signaling by ROBO receptors	0	DCC
Regulation of Insulin-like Growth Factor (IGF) transport and uptake by IGFBPs	0	LTBP1
COPI-mediated anterograde transport	0	TUBB3
Intra-Golgi and retrograde Golgi-to-ER traffic	0	TUBB3,USE1
Mitotic Prometaphase	0	PPP2R5B,TUBB3
Neddylation	0	WDR5
Post-translational protein phosphorylation	0	LTBP1
Class I MHC mediated antigen processing and presentation	0	SNAP23
Signaling by the B Cell Receptor (BCR)	0	PIK3AP1
Hepatic Cholestasis	0	ADCY5
Autism Signaling Pathway	0	ALDH1A3,CACNG5,NLGN3
NAFLD Signaling Pathway	0	BAK1,PPP2R5B
FXR/RXR Activation	0	MGST1
Clathrin-mediated Endocytosis Signaling	0	PDGFC,VEGFD
Role of Pattern Recognition Receptors in Recognition of Bacteria and Viruses	0	RIGI
FcŒ≥RIIB Signaling in B Lymphocytes	0	CACNG5
CCR5 Signaling in Macrophages	0	CACNG5,FAS
Cytotoxic T Lymphocyte-mediated Apoptosis of Target Cells	0	DFFA,FAS
CTLA4 Signaling in Cytotoxic T Lymphocytes	0	PLD5,PPP2R5B
IL-15 Production	0	RET
T Helper Cell Differentiation	0	IL12RB2
CCR3 Signaling in Eosinophils	0	MYLK
Virus Entry via Endocytic Pathways	0	FLNC
Dendritic Cell Maturation	0	COL1A1
Neuropathic Pain Signaling in Dorsal Horn Neurons	0	CAMK1
Renin-Angiotensin Signaling	0	ADCY5
ICOS-ICOSL Signaling in T Helper Cells	0	PLEKHA2
HGF Signaling	0	ITGA6
Human Embryonic Stem Cell Pluripotency	0	PDGFC,SMAD3
Type I Diabetes Mellitus Signaling	0	FAS
Allograft Rejection Signaling	0	FAS
Autoimmune Thyroid Disease Signaling	0	FAS
Graft-versus-Host Disease Signaling	0	FAS
Chronic Myeloid Leukemia Signaling	0	FAS,SMAD3
p70S6K Signaling	0	PPP2R5B
G Beta Gamma Signaling	0	CACNG5
Systemic Lupus Erythematosus Signaling	0	BDKRB2
CDC42 Signaling	0	ITGA6,MYLK
FAK Signaling	0	ADGRG1,ADGRG6,BDKRB2,COL1A1,GPR155,IL12RB2,ITGA6,NEDD9,PROKR1,PTGFR
AMPK Signaling	0	KAT2B,PPP2R5B
RAC Signaling	0	ITGA6
Role of Osteoblasts, Osteoclasts and Chondrocytes in Rheumatoid Arthritis	0	COL1A1,DKK3
Phospholipase C Signaling	0	ADCY5,AHNAK,ITGA6,PLD5,RHOC,RND2
HER-2 Signaling in Breast Cancer	0	SMAD3,TGFA
Altered T Cell and B Cell Signaling in Rheumatoid Arthritis	0	FAS
Role of Macrophages, Fibroblasts and Endothelial Cells in Rheumatoid Arthritis	0	DKK3,PDGFC,VEGFD
Regulation of IL-2 Expression in Activated and Anergic T Lymphocytes	0	SMAD3
PKCŒ∏ Signaling in T Lymphocytes	0	CACNG5
Antiproliferative Role of TOB in T Cell Signaling	0	SMAD3
PI3K Signaling in B Lymphocytes	0	PIK3AP1,PLEKHA2
P2Y Purigenic Receptor Signaling Pathway	0	ADCY5
Sertoli Cell-Sertoli Cell Junction Signaling	0	ITGA6,TUBB3
Telomerase Signaling	0	PPP2R5B
Transcriptional Regulatory Network in Embryonic Stem Cells	0	SMAD3
D-myo-inositol-5-phosphate Metabolism	0	PPP2R5B
D-myo-inositol (1,4,5,6)-Tetrakisphosphate Biosynthesis	0	PPP2R5B
Superpathway of Inositol Phosphate Compounds	0	PPP2R5B
D-myo-inositol (3,4,5,6)-tetrakisphosphate Biosynthesis	0	PPP2R5B
3-phosphoinositide Degradation	0	PPP2R5B
3-phosphoinositide Biosynthesis	0	PPP2R5B
GŒ±s Signaling	0	ADCY5
Sperm Motility	0	NPR1,RET
TEC Kinase Signaling	0	FAS,ITGA6,RHOC,RND2
Estrogen Receptor Signaling	0	ADCY5,CACNG5,PDGFC,VEGFD
ERK/MAPK Signaling	0	ITGA6,PPP2R5B
PTEN Signaling	0	ITGA6
Protein Ubiquitination Pathway	0	AMFR
IL-4 Signaling	0	COL1A1,COL6A1,FAS
B Cell Receptor Signaling	0	PIK3AP1
PPAR Signaling	0	PDGFC
p38 MAPK Signaling	0	FAS
NF-Œ∫B Signaling	0	TGFA
IL-6 Signaling	0	COL1A1
Sirtuin Signaling Pathway	0	RRP9
Iron homeostasis signaling pathway	0	SMAD3
Th17 Activation Pathway	0	IL12RB2
Endocannabinoid Developing Neuron Pathway	0	ADCY5
T Cell Exhaustion Signaling Pathway	0	IL12RB2,PPP2R5B,SMAD3
Synaptogenesis Signaling Pathway	0	ADCY5,NLGN3,SYT2
Systemic Lupus Erythematosus in T Cell Signaling Pathway	0	FAS,PPP2R5B,RHOC,RND2
Systemic Lupus Erythematosus in B Cell Signaling Pathway	0	PIK3AP1
Inhibition of ARE-Mediated mRNA Degradation Pathway	0	PPP2R5B
Xenobiotic Metabolism General Signaling Pathway	0	MGST1
Semaphorin Neuronal Repulsive Signaling Pathway	0	ITGA6
Kinetochore Metaphase Signaling Pathway	0	PPP2R5B

## Sheet: IPA_Unique-in-siMYCN
¬© 2000-2023 QIAGEN. All rights reserved.
Ingenuity Canonical Pathways	-log(p-value)	Molecules
L1CAM interactions	10.9	ANK1,ANK2,ANK3,AP2A1,AP2A2,CHL1,DCX,DNM3,DPYSL2,GAP43,ITGB3,KCNQ2,L1CAM,LAMA1,NCAM1,NCAN,NFASC,NRP1,SCN2A,SCN3A,SCN3B,SCN5A,SCN9A,SPTBN1,SPTBN4,SRC,TUBA1A,TUBA1C,TUBB2A,TUBB2B
Cardiac conduction	9.06	ATP1A3,ATP1B1,ATP1B2,ATP1B3,ATP2A3,ATP2B3,CACNA1C,CACNA2D2,CACNB1,CACNG4,CACNG7,CALM1 (includes others),DMPK,FGF14,FXYD6,KCND2,KCNK12,KCNK3,KCNK5,NPR2,ORAI2,PRKACA,RYR2,SCN2A,SCN3A,SCN3B,SCN5A,SCN9A
Glutaminergic Receptor Signaling Pathway (Enhanced)	7.4	ADCY7,CACNA1C,CACNA2D2,CACNB1,CACNB3,CACNG2,CACNG4,CACNG7,CALM1 (includes others),CREB5,DGKI,GABBR1,GABRA2,GABRA5,GNAO1,GRIK5,GRIN3A,GRINA,GUCY1A1,IKBKB,KCNK3,MAPK11,NAPB,NFKB1,PIK3C2B,PIK3R1,PLCB4,PLCE1,PLCH1,PLCL1,PLD3,PLD6,PRDX6,PRKACA,PRKCA,SCN2A,SCN3A,SCN3B,SCN5A,SCN9A,SHANK2,SLC1A3,SLC38A5,SRC,TGFB2
Acetylcholine Receptor Signaling Pathway	6.12	ADAM19,ADCY7,BCL2,CACNA1C,CACNA2D2,CACNB1,CACNB3,CACNG2,CACNG4,CACNG7,CALM1 (includes others),CASP3,CASP9,CHRFAM7A,CHRM1,CHRM2,CHRNA3,CHRNA5,CREB5,GNAO1,GUCY1A1,NFKB1,PIK3C2B,PIK3R1,PLCB4,PLCE1,PLCH1,PLCL1,PRKACA,PRKCA
Amyotrophic Lateral Sclerosis Signaling	6.11	BCL2,CACNA1C,CACNA2D2,CACNB1,CACNB3,CACNG2,CACNG4,CACNG7,CAPN1,CAPN5,CASP3,CASP9,GRIK5,GRIN3A,GRINA,HECW1,PGF,PIK3C2B,PIK3R1,RAB5B,RNF19A,VEGFB
Nitric Oxide Signaling in the Cardiovascular System	5.28	ATP2A3,CACNA1C,CACNA2D2,CACNB1,CACNB3,CACNG2,CACNG4,CACNG7,CALM1 (includes others),CHRM1,GUCY1A1,NPR2,PDE2A,PGF,PIK3C2B,PIK3R1,PRKACA,PRKCA,PRKG1,RYR2,VEGFB
Synaptogenesis Signaling Pathway	5.28	ADCY7,AP2A1,AP2A2,CACNA2D2,CACNB1,CACNB3,CADM1,CALM1 (includes others),CDH6,CDH7,CLASP2,CPLX3,CREB5,EFNA2,EFNB3,GRIN3A,GRINA,GUCY1A1,KALRN,LIMK1,LRP1,MAP1B,MAPT,MRAS,NAPB,NRXN1,PIK3C2B,PIK3R1,PRKACA,RAB5B,RELN,SHC1,SHF,SOS2,SRC,SYN1,SYT11,SYT17,SYT9
GABA Receptor Signaling	5.27	ABAT,ADCY7,AP2A1,AP2A2,CACNA1C,CACNA2D2,CACNB1,CACNB3,CACNG2,CACNG4,CACNG7,GABARAP,GABBR1,GABRA2,GABRA5,GNAO1,GNAZ,GNG2,GUCY1A1,KCNN1,KCNQ2,MRAS
Kinesins	5.19	KIF13B,KIF1A,KIF1B,KIF1C,KIF26A,KIF3C,KIF5A,KIF5C,KIFAP3,KLC1,TUBA1A,TUBA1C,TUBB2A,TUBB2B
Cardiac Hypertrophy Signaling	5.18	ADCY7,ADSS2,CACNA1C,CACNA2D2,CACNB1,CACNB3,CACNG2,CACNG4,CACNG7,CALM1 (includes others),DIRAS3,GNAO1,GNAZ,GNG2,GUCY1A1,JUN,MAP3K12,MAP3K13,MAPK10,MAPK11,MAPKAPK3,MRAS,MYL6,PIK3C2B,PIK3R1,PLCB4,PLCE1,PLCH1,PLCL1,PRKACA,RHOBTB2,RHOQ,RHOU,TGFB2
Neurovascular Coupling Signaling Pathway	5.04	CACNA1C,CACNA2D2,CACNB1,CACNB3,CACNG2,CACNG4,CACNG7,CALM1 (includes others),CHRM1,CHRM2,GABBR1,GABRA2,GABRA5,GRIN3A,GRINA,GUCY1A1,KCNJ6,KCNMA1,KCNN1,LRRC55,MAPT,NPR2,NPR3,ORAI2,PLCB4,PRDX6,PRKACA,PRKG1,RYR2,SLC16A1,SLC1A3
White Adipose Tissue Browning Pathway	4.95	ADCY7,CACNA1C,CACNA2D2,CACNB1,CACNB3,CACNG2,CACNG4,CACNG7,CEBPB,CREB5,FGFR2,FGFR3,FGFRL1,FNDC5,GUCY1A1,LDHA,MAPK11,PRKACA,PRKG1,RARA,RARB,SLC16A1
Endocannabinoid Neuronal Synapse Pathway	4.91	ADCY7,CACNA1C,CACNA2D2,CACNB1,CACNB3,CACNG2,CACNG4,CACNG7,CNR1,GNAO1,GNG2,GRIN3A,GRINA,GUCY1A1,KCNJ6,MAPK10,MAPK11,MAPK4,PLCB4,PLCE1,PLCH1,PLCL1,PRKACA
RET signaling	4.89	DOK4,DOK6,GAB2,GFRA2,IRS2,PDLIM7,PIK3R1,PRKACA,PRKCA,SHC1,SRC
Germ Cell-Sertoli Cell Junction Signaling	4.81	ACTN2,CTNNA2,DIRAS3,ILK,JUP,LIMK1,MAP3K12,MAP3K13,MAPK10,MRAS,PAK3,PDPK1,PIK3C2B,PIK3R1,RHOBTB2,RHOQ,RHOU,SRC,TGFB2,TNFRSF1A,TUBA1A,TUBA1C,TUBB2A,TUBB2B,ZYX
Serotonin Receptor Signaling	4.74	ADCY7,BCL2,CACNA1C,CACNA2D2,CACNB1,CACNB3,CACNG2,CACNG4,CACNG7,CALM1 (includes others),CASP3,CREB5,DDC,DIRAS3,GAP43,GCH1,GNAO1,GNG2,GUCY1A1,ITGB3,JUN,KALRN,KCNJ6,KCNN1,KCNQ2,MAOA,MAP1LC3B,MAPK11,MAPT,MRAS,NFKB1,ORAI2,PAK3,PIK3C2B,PIK3R1,PLCB4,PLCE1,PLCH1,PLCL1,PLD3,PLD6,PRDX6,PRKACA,PRKCA,RHOBTB2,RHOQ,RHOU,RYR2,SRC,TGFB2
Orexin Signaling Pathway	4.74	ADCY7,ATP6V0A1,ATP6V0D1,ATP6V0E2,ATP6V1G2,CACNA1C,CACNA2D2,CACNB1,CACNB3,CACNG2,CACNG4,CACNG7,CALM1 (includes others),CASP3,CNR1,GNG2,GUCY1A1,KCNJ6,MAPK11,NFKB1,PIK3C2B,PIK3R1,PIP5K1C,PLCB4,PLCE1,PLCH1,PLCL1,PRKACA,PRKCA,SRC,STAR
Axonal Guidance Signaling	4.68	ABLIM1,ADAM19,ADAMTS20,ADAMTS4,ADAMTS7,DPYSL2,EFNA2,EFNB3,ERBB2,FZD8,GNAO1,GNAZ,GNG2,ITGB3,KALRN,KLC1,L1CAM,LIMK1,MICAL1,MMP15,MRAS,MYL6,NRP1,NTNG1,NTRK1,NTRK3,PAK3,PGF,PIK3C2B,PIK3R1,PLCB4,PLCE1,PLCH1,PLCL1,PLXNA2,PLXNA3,PLXNC1,PRKACA,PRKCA,RGS3,RTN4,SDC2,SEMA4G,SEMA6C,SHANK2,SHC1,SOS2,TUBA1A,TUBA1C,TUBB2A,TUBB2B,UNC5C,VEGFB
NCAM signaling for neurite out-growth	4.5	CACNA1C,CACNB1,CACNB3,COL4A1,COL5A1,COL6A2,COL6A6,GFRA2,NCAM1,NCAN,SPTBN1,SPTBN4,SRC
Semaphorin Signaling in Neurons	4.5	ARHGAP1,DIRAS3,DPYSL2,DPYSL3,DPYSL4,LIMK1,NRP1,PAK3,PLXNA2,PLXNA3,RHOBTB2,RHOQ,RHOU
Ion channel transport	4.35	ANO4,ANO8,ATP13A2,ATP1A3,ATP1B1,ATP1B2,ATP1B3,ATP2A3,ATP2B3,ATP6V0A1,ATP6V0D1,ATP6V0E2,ATP6V1G2,ATP8A2,ATP9A,CALM1 (includes others),CLCN4,CLCN5,FXYD6,NEDD4L,RYR2,SLC9B2,TSC22D3,TTYH3,UNC79
UVA-Induced MAPK Signaling	4.33	CASP3,CASP9,JUN,MAPK10,MAPK11,MRAS,PARP6,PARP9,PIK3C2B,PIK3R1,PLCB4,PLCE1,PLCH1,PLCL1,PRKCA,SMPD1,SMPD3
Semaphorin Neuronal Repulsive Signaling Pathway	4.28	DPYSL2,DPYSL3,DPYSL4,ERBB2,GUCY1A1,ITGB3,LIMK1,MAPT,MICAL1,MYL6,NCAN,NRP1,PAK3,PIK3C2B,PIK3R1,PIP5K1C,PLXNA2,PLXNA3,PRKACA,PRKG1,SEMA6C,VCAN
Endothelin-1 Signaling	4.28	ADCY7,CASP3,CASP9,ECE1,GNAO1,GNAZ,GUCY1A1,JUN,MAPK10,MAPK11,MAPK4,MRAS,NPR2,PIK3C2B,PIK3R1,PLCB4,PLCE1,PLCH1,PLCL1,PLD3,PLD6,PRDX6,PRKCA,SHC1,SHF,SRC
Major pathway of rRNA processing in the nucleolus and cytosol	4.23	DDX21,DHX37,EBNA1BP2,EXOSC5,EXOSC7,FBL,GNL3,HEATR1,NCL,NIP7,NOB1,NOL6,NOP14,PNO1,RCL1,RPL35,RPP40,RPS2,RPS6,UTP20,UTP25,WDR3,WDR43,WDR46,WDR75
Opioid Signaling Pathway	4.19	ADCY7,AP2A1,AP2A2,CACNA1C,CACNA2D2,CACNB1,CACNB3,CACNG2,CACNG4,CACNG7,CALM1 (includes others),CLTB,CREB5,GNAO1,GNAZ,GNG2,GRIN3A,GRINA,GUCY1A1,KCNJ6,MAPK4,MRAS,NFKB1,PRKACA,PRKCA,RGS12,RGS3,RGS8,RYR2,SIGMAR1,SOS2,SRC,TCF7L2
Adrenomedullin signaling pathway	4.09	ADCY7,BCL2,CALM1 (includes others),CASP3,CEBPB,GUCY1A1,KCNN1,KCNQ2,MAPK10,MAPK11,MAPK4,MRAS,NFKB1,NPR2,NPR3,PIK3C2B,PIK3R1,PLCB4,PLCE1,PLCH1,PLCL1,PRKACA,PRKG1,SHC1,SHF,SOS2
GNRH Signaling	4.04	ADCY7,CACNA1C,CACNA2D2,CACNB1,CACNB3,CACNG2,CACNG4,CACNG7,CALM1 (includes others),CREB5,GNG2,GUCY1A1,JUN,MAP3K12,MAP3K13,MAPK10,MAPK11,MRAS,NFKB1,PAK3,PLCB4,PRKACA,PRKCA,SOS2,SRC
Extracellular matrix organization	4	ADAM19,COL4A1,COL5A1,COL6A2,COL6A6,DDR1,DMD,ITGB3,LAMA1,LRP4,NCAM1,NCAN,NRXN1,TGFB2,TNC,TNR,VCAN
Thrombin Signaling	3.99	ADCY7,ARHGEF10,ARHGEF10L,ARHGEF3,ARHGEF40,DIRAS3,GNAO1,GNAZ,GNG2,GUCY1A1,IKBKB,MAPK11,MRAS,MYL6,NFKB1,PDPK1,PIK3C2B,PIK3R1,PLCB4,PLCE1,PLCH1,PLCL1,PRKCA,RHOBTB2,RHOQ,RHOU,SHC1,SRC
GABAergic Receptor Signaling Pathway (Enhanced)	3.91	ABAT,ADCY7,CACNA1C,CACNA2D2,CACNB1,CACNB3,CACNG2,CACNG4,CACNG7,GABBR1,GABRA2,GABRA5,GNAO1,GNG2,GRIN3A,GRINA,GUCY1A1,KCNJ6,NRXN1,PRKACA
Dilated Cardiomyopathy Signaling Pathway	3.9	ADCY7,BCL2,CACNA1C,CACNA2D2,CACNB1,CACNB3,CACNG2,CACNG4,CACNG7,CASP9,DMD,GUCY1A1,ILK,LMNA,MAPK11,MYL6,PDE2A,PRKACA,RYR2,SCN5A,TPM1
Cellular Effects of Sildenafil (Viagra)	3.9	ADCY7,CACNA1C,CACNA2D2,CACNB1,CACNB3,CACNG2,CACNG4,CACNG7,CALM1 (includes others),GUCY1A1,KCNN1,KCNQ2,MYL6,NPR2,PDE2A,PLCB4,PLCE1,PLCH1,PLCL1,PRKACA,PRKG1
PTEN Signaling	3.86	BCL2,CASP3,CASP9,CCND1,CNKSR3,FGFR2,FGFR3,IKBKB,ILK,INSR,ITGB3,MAGI2,MRAS,NFKB1,NTRK1,NTRK3,OCRL,PDPK1,PIK3R1,SHC1,SOS2
Hepatic Fibrosis Signaling Pathway	3.72	APC2,BCL2,CACNA1C,CACNA2D2,CACNB1,CACNB3,CACNG2,CACNG4,CACNG7,CALM1 (includes others),CASP3,CCND1,CEBPB,CNR1,CREB5,DIRAS3,FZD8,IKBKB,IL17RA,IRS2,ITGB3,JUN,KLF9,LRP1,MAPK10,MAPK11,MRAS,MYL6,NFKB1,PGF,PIK3C2B,PIK3R1,PRKACA,PRKCA,RHOBTB2,RHOQ,RHOU,SOS2,TCF7L2,TFRC,TGFB2,TNFRSF1A,VEGFB
Purine Nucleotides De Novo Biosynthesis II	3.69	ADSS1,ADSS2,PAICS,PFAS,PPAT
Role of NFAT in Cardiac Hypertrophy	3.64	ADCY7,CACNA1C,CACNA2D2,CACNB1,CACNB3,CACNG2,CACNG4,CACNG7,CALM1 (includes others),GNG2,GUCY1A1,HDAC11,MAPK10,MAPK11,MRAS,PIK3C2B,PIK3R1,PLCB4,PLCE1,PLCH1,PLCL1,PRKACA,PRKCA,SHC1,SOS2,SRC,TGFB2
Semaphorin interactions	3.63	DPYSL2,DPYSL3,DPYSL4,ERBB2,LIMK1,MYL6,NRP1,PAK3,PIP5K1C,PLXNA2,PLXNA3,PLXNC1
Cardiac Œ≤-adrenergic Signaling	3.61	ADCY7,AKAP6,ATP2A3,CACNA1C,CACNA2D2,CACNB1,CACNB3,CACNG2,CACNG4,CACNG7,FICD,GNAO1,GNAZ,GNG2,GUCY1A1,MPPED2,MRAS,PDE2A,PKIA,PKIB,PLD6,PRKACA,RYR2
Androgen Signaling	3.6	CACNA1C,CACNA2D2,CACNB1,CACNB3,CACNG2,CACNG4,CACNG7,CALM1 (includes others),CCND1,GNAO1,GNAZ,GNG2,JUN,MRAS,NCOA1,NFKB1,PRKACA,PRKCA,SHC1,SRC,TAF4B,TGFB1I1
nNOS Signaling in Skeletal Muscle Cells	3.5	CACNA1C,CACNA2D2,CACNB1,CACNB3,CACNG2,CACNG4,CACNG7,CALM1 (includes others),DMD,RYR2
Glutamate binding, activation of AMPA receptors and synaptic plasticity	3.47	AP2A1,AP2A2,CACNG2,CACNG4,EPB41L1,GRIP1,PRKCA,TSPAN7
Presynaptic depolarization and calcium channel opening	3.47	CACNA2D2,CACNB1,CACNB3,CACNG2,CACNG4
Sertoli Cell-Sertoli Cell Junction Signaling	3.43	ACTN2,CDH6,CDH7,CLDN10,CLDN15,CREB5,CTNNA2,JAM3,JUN,JUP,LAMA1,MAP3K12,MAP3K13,MAPK10,MAPK11,MRAS,NFKB1,PAK3,PIK3C2B,PIK3R1,SPTBN1,SRC,TNFRSF1A,TUBA1A,TUBA1C,TUBB2A,TUBB2B,YBX3
14-3-3-mediated Signaling	3.42	JUN,MAPK10,MAPT,MRAS,PIK3C2B,PIK3R1,PLCB4,PLCE1,PLCH1,PLCL1,PRKCA,SRC,TNFRSF1A,TSC2,TUBA1A,TUBA1C,TUBB2A,TUBB2B
G Beta Gamma Signaling	3.42	CACNA1C,CACNA2D2,CACNB1,CACNB3,CACNG2,CACNG4,CACNG7,GNAO1,GNAZ,GNG2,KCNJ6,MRAS,PDPK1,PRKACA,PRKCA,SHC1,SOS2,SRC
Dopamine-DARPP32 Feedback in cAMP Signaling	3.4	ADCY7,ATP2A3,CACNA1C,CACNA2D2,CACNB1,CACNB3,CACNG2,CACNG4,CACNG7,CALM1 (includes others),CREB5,GRIN3A,GRINA,GUCY1A1,KCNJ6,PAWR,PLCB4,PLCE1,PLCH1,PLCL1,PRKACA,PRKCA,PRKG1
Corticotropin Releasing Hormone Signaling	3.39	ADCY7,CACNA1C,CACNA2D2,CACNB1,CACNB3,CACNG2,CACNG4,CACNG7,CALM1 (includes others),CNR1,CREB5,GNAO1,GUCY1A1,JUN,JUND,MAPK11,NPR2,NPR3,PRKACA,PRKCA
Netrin Signaling	3.38	ABLIM1,CACNA1C,CACNA2D2,CACNB1,CACNB3,CACNG2,CACNG4,CACNG7,CASP9,DPYSL2,DPYSL3,DPYSL4,FMO5,NAPB,NFKB1,PIK3C2B,PIK3R1,PRKACA,PRKCA,PRKG1,RYR2,UNC5C
Remodeling of Epithelial Adherens Junctions	3.38	ACTN2,ARF6,CTNNA2,DNM3,MAPRE3,RAB5B,SRC,TUBA1A,TUBA1C,TUBB2A,TUBB2B,ZYX
Type II Diabetes Mellitus Signaling	3.35	CACNA1C,CACNA2D2,CACNB1,CACNB3,CACNG2,CACNG4,CACNG7,CEBPB,IKBKB,INSR,IRS2,MAPK10,NFKB1,PDPK1,PIK3C2B,PIK3R1,PRKCA,SMPD1,SMPD3,TNFRSF1A
Adrenergic Receptor Signaling Pathway (Enhanced)	3.33	ADCY7,ATP6V0A1,ATP6V0D1,ATP6V0E2,ATP6V1G2,CACNA1C,CACNA2D2,CACNB1,CACNB3,CACNG2,CACNG4,CACNG7,DDC,GNAO1,GUCY1A1,MAOA,PLCB4,PLCE1,PLCH1,PLCL1,PRKACA,PRKCA,SLC6A2,TGFB2
IL-8 Signaling	3.33	BCL2,CCND1,DIRAS3,GNAO1,GNAZ,GNG2,IKBKB,ITGB3,JUN,LASP1,LIMK1,MAPK10,MRAS,NFKB1,PGF,PIK3C2B,PIK3R1,PLD3,PLD6,PRKCA,RHOBTB2,RHOQ,RHOU,SRC,VEGFB
ILK Signaling	3.27	ACTN2,CASP3,CCND1,CREB5,DIRAS3,FBLIM1,ILK,IRS2,ITGB3,JUN,MAPK10,MYL6,NFKB1,PDPK1,PGF,PIK3C2B,PIK3R1,RHOBTB2,RHOQ,RHOU,TGFB1I1,TMSB10/TMSB4X,TNFRSF1A,VEGFB
Sphingosine-1-phosphate Signaling	3.25	ADCY7,CASP3,CASP9,DIRAS3,GUCY1A1,PIK3C2B,PIK3R1,PLCB4,PLCE1,PLCH1,PLCL1,RHOBTB2,RHOQ,RHOU,S1PR1,SMPD1,SMPD3
RHO GTPase cycle	3.18	ARHGAP1,ARHGAP18,ARHGAP33,ARHGEF10,ARHGEF10L,ARHGEF3,ARHGEF40,BASP1,C1QBP,CDC42EP3,CDC42EP4,CHN2,DAAM1,DEPDC1B,FILIP1,FLOT1,FLOT2,FMNL1,GMIP,HSPE1,IQGAP2,JAG1,JUP,KALRN,MCF2L,NISCH,OCRL,PAK3,PIK3R1,PKN3,PLEKHG2,PTPN13,RHOBTB2,RHOQ,RHOU,SH3BP1,SHMT2,SLITRK5,SOS2,SPTBN1,SRC,STMN2,TFRC
eNOS Signaling	3.17	ADCY7,AQP11,CALM1 (includes others),CASP3,CASP9,CCNA1,CHRFAM7A,CHRNA3,CHRNA5,CNGB1,GUCY1A1,LPAR3,PDPK1,PGF,PIK3C2B,PIK3R1,PRKACA,PRKCA,PRKG1,VEGFB
Endometrial Cancer Signaling	3.16	APC2,CASP9,CCND1,CTNNA2,ERBB2,ILK,MRAS,PDPK1,PIK3C2B,PIK3R1,SOS2
Circadian Rhythm Signaling	3.14	ADCY7,CACNA1C,CACNA2D2,CACNB1,CACNB3,CACNG2,CACNG4,CACNG7,CIART,CREB5,GNG2,GRIN3A,GRINA,GUCY1A1,HLF,MKNK2,MRAS,NPR2,NPR3,PLCB4,PLCE1,PLCH1,PLCL1,PRKACA,PRKCA,PRKG1,RORB,RYR2,SRC
MHC class II antigen presentation	3.09	AP2A1,AP2A2,CTSC,CTSF,CTSK,DCTN1,DNM3,KIF26A,KIF3C,KIF5A,KIF5C,KIFAP3,KLC1,TUBA1A,TUBA1C,TUBB2A,TUBB2B
Carboxyterminal post-translational modifications of tubulin	3.07	NICN1,SVBP,TTL,TTLL12,TUBA1A,TUBA1C,TUBB2A,TUBB2B,VASH1
Glioblastoma Multiforme Signaling	3.06	APC2,CCND1,DIRAS3,E2F5,E2F7,FZD8,IGF2,MRAS,PIK3C2B,PIK3R1,PLCB4,PLCE1,PLCH1,PLCL1,RHOBTB2,RHOQ,RHOU,SHC1,SOS2,SRC,TSC2
Mitochondrial biogenesis	3.04	ACSS2,CALM1 (includes others),CRTC1,CRTC2,HELZ2,MAPK11,NCOA1,PPARGC1B,PPRC1,TFB2M,TWNK
Colorectal Cancer Metastasis Signaling	3.02	ADCY7,CASP3,CASP9,CCND1,DIRAS3,FZD8,GNAO1,GNAZ,GNG2,GUCY1A1,JUN,LRP1,MAPK10,MMP15,MRAS,NFKB1,PGF,PIK3C2B,PIK3R1,PRKACA,RHOBTB2,RHOQ,RHOU,SOS2,SRC,TCF7L2,TGFB2,TNFRSF1A,VEGFB
Reelin Signaling in Neurons	2.99	APBB1,ARHGEF10,ARHGEF10L,ARHGEF3,ARHGEF40,CNR1,DCX,GRIN3A,GRINA,LIMK1,MAP1B,MAPK10,MAPK8IP1,MAPT,PIK3C2B,PIK3R1,RELN,SRC
Cardiac Hypertrophy Signaling (Enhanced)	2.97	ADCY7,ATP2A3,CACNA1C,CACNA2D2,CACNB1,CACNB3,CACNG2,CACNG4,CACNG7,CALM1 (includes others),FGF14,FGF19,FGFR2,FGFR3,FGFRL1,FICD,FZD8,GNG2,GUCY1A1,HDAC11,IKBKB,IL17RA,ITGB3,JUN,MAP3K12,MAP3K13,MAPK10,MAPK11,MAPKAPK3,MKNK2,MPPED2,MRAS,NFKB1,PDE2A,PIK3C2B,PIK3R1,PLCB4,PLCE1,PLCH1,PLCL1,PLD6,PRKACA,PRKCA,PRKG1,RPS6,RYR2,TGFB2,TNFRSF1A,TSC2
GPCR-Mediated Nutrient Sensing in Enteroendocrine Cells	2.97	ADCY7,CACNA1C,CACNA2D2,CACNB1,CACNB3,CACNG2,CACNG4,CACNG7,GNG2,GUCY1A1,PLCB4,PLCE1,PLCH1,PLCL1,PRKACA,PRKCA
Signaling by VEGF	2.92	CALM1 (includes others),ITGB3,JUP,MAPK11,MAPKAPK3,NRP1,PAK3,PDPK1,PGF,PIK3R1,PRKACA,PRKCA,SHB,SRC,VEGFB
G-Protein Coupled Receptor Signaling	2.89	ADCY7,ADGRA2,ADGRL1,CALM1 (includes others),CCKAR,CCND1,CHRM1,CHRM2,CNGB1,CNR1,CREB5,DUSP6,FICD,FZD8,GABBR1,GNAO1,GNAZ,GNG2,GPR137C,GPR153,GPR162,GPR173,GPR26,GPRC5B,GUCY1A1,HCN2,IKBKB,JUN,KCNN1,KCNQ2,LGR5,LPAR3,LTB4R,MAP3K12,MAP3K13,MAPK10,MAPK11,MCHR1,MPPED2,MRAS,MRTFA,MYL6,NFKB1,NPR3,PAK3,PDE2A,PDPK1,PIK3C2B,PIK3R1,PLCB4,PLCE1,PLD6,PRKACA,PRKCA,RGS12,S1PR1,SHC1,SIX4,SOS2,SRC
Neurexins and neuroligins	2.89	APBA1,DLG2,DLGAP2,EPB41L1,EPB41L2,EPB41L3,NRXN1,SHANK2,SIPA1L1,SYT9
GDNF Family Ligand-Receptor Interactions	2.88	DOK4,DOK6,GFRA2,IRS2,JUN,MAPK10,MRAS,PDLIM7,PIK3C2B,PIK3R1,SHC1,SOS2
ID1 Signaling Pathway	2.88	BCL2,CCND1,CDKN1C,CHRFAM7A,CHRNA3,CHRNA5,FGFR2,FGFR3,FGFRL1,IGF2,MAPK11,MRAS,NFKB1,PGF,PIK3C2B,PIK3R1,REST,RNF125,SRC,STMN3,TGFB2,TNFRSF1A,VEGFB
Glycerophospholipid biosynthesis	2.84	AGPAT4,AGPAT5,BCHE,CDIPT,CDS2,CHKB,CHPT1,ETNK2,GPAT4,LPCAT3,PLD3,PLD6,SLC44A2,SLC44A3
Parkinson's Signaling	2.81	CASP3,CASP9,MAPK11,PRKN,SEPTIN5
Thyroid Cancer Signaling	2.78	ALK,CCND1,INSR,IRS2,JUN,MRAS,NTRK1,NTRK3,PIK3C2B,PIK3R1,SHC1,TCF7L2
Sperm Motility	2.78	ALK,CALM1 (includes others),CNGB1,DDR1,ERBB2,FGFR2,FGFR3,GNAO1,GNAZ,GNG2,GUCY1A1,INSR,MRAS,NTRK1,NTRK3,PDE2A,PLCB4,PLCE1,PLCH1,PLCL1,PRDX6,PRKACA,PRKCA,PRKG1,SLC16A10,SRC,TNK2
Role of Osteoclasts in Rheumatoid Arthritis Signaling Pathway	2.76	ADAM19,BCL2,CALM1 (includes others),CASP9,CCND1,COL4A1,COL5A1,COL6A2,COL6A6,CREB5,CTNNA2,CTSK,DIRAS3,IKBKB,ITGB3,JUN,MAPK10,MAPK11,MITF,MMP15,MRAS,NFKB1,PIK3C2B,PIK3R1,RHOBTB2,RHOQ,RHOU,SHC1,SOS2,SRC,TNFRSF1A
Oxytocin Signaling Pathway	2.75	ATP2B3,CACNA1C,CACNA2D2,CACNB1,CACNB3,CACNG2,CACNG4,CACNG7,CALM1 (includes others),CREB5,GNAO1,GNG2,GUCY1A1,MAPK10,MAPK11,MAPK4,MRAS,MYL6,NFKB1,NPR2,NPR3,PIK3C2B,PIK3R1,PLCB4,PRKACA,PRKCA,PRKG1,SHC1,SOS2
MYC Mediated Apoptosis Signaling	2.73	BCL2,CASP3,CASP9,CFLAR,IKBKB,NFKB1,PMAIP1,PRKACA,TNFRSF1A
Signaling by NTRK3 (TRKC)	2.68	NTRK3,PIK3R1,PTPRO,SHC1,SRC
Superpathway of Inositol Phosphate Compounds	2.64	ALPL,CDIPT,DUSP10,DUSP16,DUSP6,DUSP8,EPHX2,MTMR9,NUDT11,OCRL,PALD1,PAWR,PIK3C2B,PIK3R1,PIP5K1C,PLCB4,PLCE1,PLCH1,PPIP5K2,PTPN13,PTPRM,PTPRN,PTPRO,SGPP2,SSH2
Transport of inorganic cations/anions and amino acids/oligopeptides	2.64	CALM1 (includes others),SLC12A6,SLC16A10,SLC17A7,SLC1A3,SLC24A3,SLC26A11,SLC38A5,SLC43A1,SLC43A2,SLC4A8,SLC6A15,SLC6A6,SLC7A2
Pancreatic Adenocarcinoma Signaling	2.59	BCL2,CASP9,CCND1,E2F5,E2F7,ERBB2,HDAC11,MAPK10,NFKB1,PGF,PIK3C2B,PIK3R1,PLD3,PLD6,TGFB2,VEGFB
Docosahexaenoic Acid (DHA) Signaling	2.59	ADCY7,BCL2,CASP3,CASP9,CCND1,CREB5,GUCY1A1,KCNMA1,PDPK1,PIK3C2B,PIK3R1,PLCB4,PLCE1,PLCH1,PLCL1,PRDX6,PRKACA,PRKCA,SERPINF1,SPTBN1,SPTBN4,SYT11,SYT17,SYT9,TGFB2,TNFRSF1A
GŒ±i Signaling	2.58	ADCY7,CHRM2,CNR1,GABBR1,GNAO1,GNAZ,GNG2,GUCY1A1,LTB4R,MRAS,NPR3,PRKACA,RGS12,S1PR1,SHC1,SOS2,SRC
Signaling by Insulin receptor	2.58	ATP6V0A1,ATP6V0D1,ATP6V0E2,ATP6V1G2,INSR,IRS2,PIK3R1,SHC1
Assembly and cell surface presentation of NMDA receptors	2.58	ACTN2,APBA1,DLG2,GRIN3A,TUBA1A,TUBA1C,TUBB2A,TUBB2B
Ephrin Receptor Signaling	2.56	CREB5,EFNA2,EFNB3,GNAO1,GNAZ,GNG2,GRIN3A,GRINA,ITGB3,KALRN,LIMK1,MRAS,PAK3,PGF,PTPN13,RGS3,SDC2,SH2D3C,SHC1,SOS2,SRC,VEGFB
Endocannabinoid Developing Neuron Pathway	2.56	ADCY7,CCND1,CNR1,CREB5,GNAO1,GNG2,GUCY1A1,MAPK10,MAPK11,MAPK4,MRAS,PIK3C2B,PIK3R1,PRKACA,SRC,STMN2
Activation of NMDA receptors and postsynaptic events	2.55	ACTN2,CALM1 (includes others),DLG2,MAPT,NRG1,PDPK1,PRKACA,SRC,TUBA1A,TUBA1C,TUBB2A,TUBB2B
ERBB Signaling	2.55	ERBB2,JUN,MAPK10,MAPK11,MRAS,NRG1,PAK3,PDPK1,PIK3C2B,PIK3R1,PRKCA,SHC1,SOS2
Intra-Golgi and retrograde Golgi-to-ER traffic	2.53	ARF5,CYTH2,CYTH3,DCTN1,KIF13B,KIF1A,KIF1B,KIF1C,KIF26A,KIF3C,KIF5A,KIF5C,KIFAP3,KLC1,MAN1C1,NAPB,RAB6B,RAB9B,TUBA1A,TUBA1C,TUBB2A,TUBB2B
AMPK Signaling	2.52	AK1,AK4,CCND1,CHRFAM7A,CHRNA3,CHRNA5,CPT1C,CREB5,CRTC2,EEF2K,GNAO1,GNAZ,GNG2,INSR,IRS2,MAPK11,MRAS,ORAI2,PFKFB4,PIK3C2B,PIK3R1,PPAT,PRKACA,RAB9B,TSC2
Non-Small Cell Lung Cancer Signaling	2.51	CASP9,CCND1,E2F5,ERBB2,FHIT,HDAC11,MRAS,PDPK1,PIK3C2B,PIK3R1,PRKCA,RARB,SOS2
IL-1 Signaling	2.51	ADCY7,GNAO1,GNAZ,GNG2,GUCY1A1,IKBKB,JUN,MAPK10,MAPK11,MRAS,NFKB1,PRKACA,TOLLIP
Tumor Microenvironment Pathway	2.45	BCL2,CCND1,CFLAR,FGF14,FGF19,IGF2,ITGB3,JUN,MMP15,MRAS,NFKB1,PGF,PIK3C2B,PIK3R1,SLC16A1,SLC2A3,TGFB2,TNC,TNFRSF1A,VEGFB
CXCR4 Signaling	2.41	ADCY7,DIRAS3,GNAO1,GNAZ,GNG2,GUCY1A1,JUN,MAPK10,MRAS,MYL6,PAK3,PIK3C2B,PIK3R1,PLCB4,PRKCA,RHOBTB2,RHOQ,RHOU,SRC
CREB Signaling in Neurons	2.4	ADCY7,ADGRA2,ADGRL1,CACNA1C,CACNA2D2,CACNB1,CACNB3,CACNG2,CACNG4,CACNG7,CALM1 (includes others),CCKAR,CHRM1,CHRM2,CNR1,CREB5,FGFR2,FGFR3,FZD8,GABBR1,GNAO1,GNAZ,GNG2,GPR137C,GPR153,GPR162,GPR173,GPR26,GPRC5B,GRIK5,GUCY1A1,INSR,LGR5,LPAR3,LTB4R,MCHR1,MRAS,NTRK1,NTRK3,PIK3C2B,PIK3R1,PLCB4,PLCE1,PLCH1,PLCL1,PRKACA,PRKCA,S1PR1,SHC1,SOS2,TGFB2
NGF Signaling	2.4	CREB5,IKBKB,MAP3K12,MAP3K13,MAPK10,MRAS,NFKB1,NTRK1,PDPK1,PIK3C2B,PIK3R1,SHC1,SMPD1,SMPD3,SOS2
Estrogen Receptor Signaling	2.38	ADCY7,BCL2,CACNA1C,CACNA2D2,CACNB1,CACNB3,CACNG2,CACNG4,CACNG7,CCND1,CREB5,GNAO1,GNAZ,GNG2,GUCY1A1,IGF2,JUN,LIMK1,MMP15,MRAS,MYL6,NCOA1,NFKB1,PGF,PIK3C2B,PIK3R1,PLCB4,PLCE1,PLCH1,PLCL1,PRKACA,PRKCA,SHC1,SHF,SOS2,SRC,VEGFB
Signaling by ALK	2.36	ALK,MYCN,PIK3R1,PRDM1,SHC1,SRC
Renin-Angiotensin Signaling	2.36	ADCY7,GUCY1A1,JUN,MAPK10,MAPK11,MRAS,NFKB1,PAK3,PIK3C2B,PIK3R1,PRKACA,PRKCA,SHC1,SHF,SOS2
P2Y Purigenic Receptor Signaling Pathway	2.36	ADCY7,CREB5,GNG2,GUCY1A1,ITGB3,JUN,MRAS,NFKB1,PIK3C2B,PIK3R1,PLCB4,PLCE1,PLCH1,PLCL1,PRKACA,PRKCA
cAMP-mediated signaling	2.36	ADCY7,AKAP6,CALM1 (includes others),CHRM1,CHRM2,CNGB1,CNR1,CREB5,DUSP6,FICD,GABBR1,GNAO1,GUCY1A1,LTB4R,MPPED2,NPR3,PDE2A,PKIA,PKIB,PLD6,PRKACA,RGS12,S1PR1,SRC
ERB2-ERBB3 Signaling	2.35	CCND1,ERBB2,JUN,MRAS,NRG1,PDPK1,PIK3C2B,PIK3R1,SHC1,SOS2
Insulin Secretion Signaling Pathway	2.35	ADCY7,CACNA1C,CACNA2D2,CACNB1,CACNB3,CACNG2,CACNG4,CACNG7,CCKAR,CREB5,CRTC2,GUCY1A1,INSR,MAPK11,NAPB,PABPC1,PIK3C2B,PIK3R1,PLCB4,PLCE1,PLCH1,PLCL1,PRKACA,PRKCA,RYR2,SLC2A3,SRC
Synaptic Long Term Depression	2.34	CACNA1C,CACNA2D2,CACNB1,CACNB3,CACNG2,CACNG4,CACNG7,GNAO1,GNAZ,GUCY1A1,MRAS,NPR2,NPR3,PLCB4,PLCE1,PLCH1,PLCL1,PRDX6,PRKCA,PRKG1,RYR2
SNARE Signaling Pathway	2.33	ADCY7,CACNA2D2,CACNB1,CACNB3,CALM1 (includes others),CPLX3,GUCY1A1,MYL6,NAPB,PRKACA,RAB9B,SNAP91,SYN1,SYT11,SYT17,SYT9
Sertoli Cell-Germ Cell Junction Signaling Pathway (Enhanced)	2.31	CLDN10,CLDN15,CTNNA2,GUCY1A1,ILK,JAM3,JUN,JUP,LAMA1,MAP3K12,MAP3K13,MAPK10,MAPK11,MRAS,NFKB1,PDPK1,PIK3C2B,PIK3R1,PRKACA,PRKG1,SRC,TGFB2,TNFRSF1A,ZYX
Endocannabinoid Cancer Inhibition Pathway	2.3	ADCY7,CASP3,CASP9,CCND1,CNR1,CREB5,GNAO1,GUCY1A1,PGF,PIK3C2B,PIK3R1,PRKACA,SMPD1,SMPD3,SRC,TCF7L2,VEGFB
Aldosterone Signaling in Epithelial Cells	2.3	DNAJB2,DNAJB5,DNAJC12,DNAJC2,DNAJC4,HSPD1,HSPE1,KCNMA1,LRRC55,PDPK1,PIK3C2B,PIK3R1,PIP5K1C,PLCB4,PLCE1,PLCH1,PLCL1,PRKCA,SOS2
COPI-mediated anterograde transport	2.28	ANK1,ANK2,ANK3,ARF5,CD59,DCTN1,NAPB,SPTBN1,SPTBN4,TUBA1A,TUBA1C,TUBB2A,TUBB2B
Antioxidant Action of Vitamin C	2.27	GLRX,IKBKB,MAPK10,MAPK11,NFKB1,PLCB4,PLCE1,PLCH1,PLCL1,PLD3,PLD6,PRDX6,SLC2A3,TXNRD2
Phosphatidylcholine Biosynthesis I	2.26	CHKB,CHPT1,PHKA1
Neuropathic Pain Signaling in Dorsal Horn Neurons	2.24	GRIN3A,GRINA,KCNN1,KCNQ2,PIK3C2B,PIK3R1,PLCB4,PLCE1,PLCH1,PLCL1,PRKACA,PRKCA,SRC
Signaling by Rho Family GTPases	2.21	ARHGEF10,ARHGEF3,CDC42EP3,CDC42EP4,CDH6,CDH7,DIRAS3,GNAO1,GNAZ,GNG2,ITGB3,JUN,LIMK1,MAP3K12,MAPK10,MRAS,MYL6,NFKB1,PAK3,PIK3C2B,PIK3R1,PIP5K1C,RHOBTB2,RHOQ,RHOU,SEPTIN5
Signaling by NTRK1 (TRKA)	2.21	AP2A1,AP2A2,DNM3,DUSP6,IRS2,MAPK11,MAPKAPK3,NTRK1,PIK3R1,SHC1,SRC
Acute Myeloid Leukemia Signaling	2.19	CCNA1,CCND1,JUP,MRAS,NFKB1,PIK3C2B,PIK3R1,PIM1,RARA,RUNX1,SOS2,TCF7L2
RANK Signaling in Osteoclasts	2.19	CALM1 (includes others),IKBKB,JUN,MAP3K12,MAP3K13,MAPK10,MAPK11,MITF,NFKB1,PIK3C2B,PIK3R1,SRC
BEX2 Signaling Pathway	2.17	BCL2,CCND1,ERBB2,JUN,MAPK10,NFKB1,PGF,PLXNC1,TCF7L2,TSC2,VEGFB
CLEAR Signaling Pathway	2.16	ATP6V0A1,ATP6V0D1,ATP6V0E2,ATP6V1G2,CREB5,CRTC2,CTSF,FGFR2,FGFR3,GABARAP,IKBKB,INSR,MAPK11,MAPK4,MITF,MRAS,NTRK1,NTRK3,PINK1,PRKCA,PRKN,RRAGB,SGSH,TFE3,TGFB2,TNFRSF1A,TSC2
Clathrin-mediated endocytosis	2.14	AP2A1,AP2A2,ARF6,CHRM2,CLTB,DNM3,OCRL,PIP5K1C,RAB5B,SCARB2,SGIP1,SNAP91,SYT11,SYT9,TFRC
TR/RXR Activation	2.14	AKR1C1/AKR1C2,CCND1,ENO1,ITGB3,KLF9,NCOA1,PGF,PIK3C2B,PIK3R1,PINK1,RAB3B,SCARB1,SRC,SREBF2,VEGFB
RHO GTPases activate IQGAPs	2.14	CALM1 (includes others),IQGAP2,TUBA1A,TUBA1C,TUBB2A,TUBB2B
Transport of bile salts and organic acids, metal ions and amine compounds	2.13	RUNX1,SLC16A1,SLC2A13,SLC39A14,SLC39A8,SLC44A2,SLC44A3,SLC47A1,SLC6A15,SLC6A2,SLC6A6
Myelination Signaling Pathway	2.13	ARF6,ARHGAP1,CALM1 (includes others),CREB5,DTX1,ERBB2,FGFR2,FGFR3,FGFRL1,FZD8,HDAC11,ID4,ILK,ITGB3,JUN,LAMA1,MPZ,MRAS,NDRG1,NFKB1,NRG1,PIK3C2B,PIK3R1,PRKACA,SLC16A1,SOS2,SRC,SREBF2,TCF7L2,TSC2
UVC-Induced MAPK Signaling	2.11	JUN,MAPK10,MAPK11,MRAS,PRKCA,SMPD1,SMPD3,SRC
Response to elevated platelet cytosolic Ca2+	2.08	ABCC4,ACTN2,CALM1 (includes others),CLU,IGF2,ITGB3,MAGED2,PRKCA,RAB27B,SERPING1,SYTL4,TGFB2,TIMP3,TMSB10/TMSB4X,VEGFB
Relaxin Signaling	2.08	ADCY7,FICD,GNAO1,GNAZ,GNG2,GUCY1A1,JUN,MPPED2,MRAS,NFKB1,NPR2,NPR3,PDE2A,PIK3C2B,PIK3R1,PLD6,PRKACA
Serine biosynthesis	2.08	PSAT1,SERINC1,SERINC2
Clathrin-mediated Endocytosis Signaling	2.07	AP2A1,AP2A2,ARF6,CLTB,CLU,DNM3,FGF14,FGF19,ITGB3,PGF,PIK3C2B,PIK3R1,PIP5K1C,RAB11B,RAB5B,SH3BP4,SH3GLB2,SNAP91,SRC,TFRC,VEGFB
3-phosphoinositide Biosynthesis	2.07	ALPL,CDIPT,DUSP10,DUSP16,DUSP6,DUSP8,EPHX2,MTMR9,NUDT11,OCRL,PALD1,PAWR,PIK3C2B,PIK3R1,PIP5K1C,PTPN13,PTPRM,PTPRN,PTPRO,SGPP2,SSH2
Nephrin family interactions	2.07	ACTN2,KIRREL1,MAGI2,PIK3R1,SPTBN1
Choline Biosynthesis III	2.06	CHPT1,PHKA1,PLD3,PLD6
D-myo-inositol-5-phosphate Metabolism	2.05	ALPL,DUSP10,DUSP16,DUSP6,DUSP8,EPHX2,MTMR9,NUDT11,OCRL,PALD1,PAWR,PLCB4,PLCE1,PLCH1,PTPN13,PTPRM,PTPRN,PTPRO,SGPP2,SSH2
5-aminoimidazole Ribonucleotide Biosynthesis I	2.03	PFAS,PPAT
Adenine and Adenosine Salvage I	2.03	APRT,PNP
GŒ±q Signaling	2.02	CALM1 (includes others),CHRM1,DIRAS3,GNAO1,GNAZ,GNG2,IKBKB,MRAS,NFKB1,PIK3C2B,PIK3R1,PLCB4,PLD3,PLD6,PRKCA,RHOBTB2,RHOQ,RHOU
S100 Family Signaling Pathway	2.02	ADGRA2,ADGRL1,BCL2,CACNA1C,CACNA2D2,CACNB1,CACNB3,CACNG2,CACNG4,CACNG7,CALM1 (includes others),CASP3,CCKAR,CHRM1,CHRM2,CNR1,CREB5,ERBB2,FGFR2,FGFR3,FGFRL1,FZD8,GABBR1,GPR137C,GPR153,GPR162,GPR173,GPR26,GPRC5B,IKBKB,ILK,JUN,LGR5,LPAR3,LTB4R,MAPK10,MAPK11,MAPK4,MCHR1,MMP15,NCL,NFKB1,PGF,PIK3C2B,PIK3R1,PLCB4,PLCE1,PLCH1,PLCL1,PRKACA,PRKCA,RYR2,S100A6,S1PR1,SERPINF1,SRC,TCF7L2,TGFB2,TPM1,VEGFB
Glioma Invasiveness Signaling	2	DIRAS3,ITGB3,MRAS,PIK3C2B,PIK3R1,RHOBTB2,RHOQ,RHOU,TIMP2,TIMP3
GPCR-Mediated Integration of Enteroendocrine Signaling Exemplified by an L Cell	2	ADCY7,CCKAR,CHRM2,GAL,GUCY1A1,PLCB4,PLCE1,PLCH1,PLCL1,PRKACA
IL-17A Signaling in Fibroblasts	1.98	BCL2,CEBPB,IKBKB,IL17RA,JUN,LOX,MAPK10,MAPK11,NFKB1,P4HA1,PRKCA
Gap Junction Signaling	1.98	ADCY7,GUCY1A1,MRAS,NPR2,NPR3,PIK3C2B,PIK3R1,PLCB4,PLCE1,PLCH1,PLCL1,PRKACA,PRKCA,PRKG1,SOS2,SRC,TUBA1A,TUBA1C,TUBB2A,TUBB2B
Integrin Signaling	1.96	ACTN2,ARF5,ARF6,CAPN1,CAPN5,DIRAS3,ILK,ITGB3,MRAS,PAK3,PIK3C2B,PIK3R1,RHOBTB2,RHOQ,RHOU,SHC1,SOS2,SRC,TNK2,TSPAN7,ZYX
RAB geranylgeranylation	1.95	RAB11B,RAB27B,RAB29,RAB39B,RAB3B,RAB3D,RAB5B,RAB6B,RAB9B
FGF Signaling	1.95	CREB5,FGF14,FGF19,FGFR2,FGFR3,FGFRL1,MAPK11,PIK3C2B,PIK3R1,PRKCA,SOS2
p75 NTR receptor-mediated signalling	1.94	ARHGEF10,ARHGEF10L,ARHGEF3,ARHGEF40,CASP3,IKBKB,KALRN,MCF2L,NFKB1,PLEKHG2,RTN4,SOS2
Melanocyte Development and Pigmentation Signaling	1.94	ADCY7,BCL2,CREB5,GUCY1A1,MITF,MRAS,PIK3C2B,PIK3R1,PRKACA,SHC1,SOS2,SRC
Gap junction trafficking and regulation	1.94	CLTB,SRC,TUBA1A,TUBA1C,TUBB2A,TUBB2B
Inhibition of Angiogenesis by TSP1	1.94	CASP3,GUCY1A1,JUN,MAPK10,MAPK11,SDC2
PI3K Cascade	1.94	FGF19,FGFR2,FGFR3,GAB2,IRS2,PDPK1,PIK3R1
Regulation of mRNA stability by proteins that bind AU-rich elements	1.94	DCP1A,EXOSC5,EXOSC7,MAPK11,PABPC1,PRKCA,ZFP36L1
TBC/RABGAPs	1.94	ARF6,GABARAP,MAP1LC3B,RAB11B,RAB5B,RAB6B,TSC2
Gustation Pathway	1.93	ADCY7,CACNA1C,CACNA2D2,CACNB1,CACNB3,CACNG2,CACNG4,CACNG7,GABRA2,GABRA5,GUCY1A1,KCNN1,KCNQ2,ORAI2,PRKACA,SCN2A,SCN3A,SCN3B,SCN5A,SCN9A
Leptin Signaling in Obesity	1.93	ADCY7,GUCY1A1,NPY,PIK3C2B,PIK3R1,PLCB4,PLCE1,PLCH1,PLCL1,PRKACA
Apelin Cardiomyocyte Signaling Pathway	1.91	ATP2A3,MAPK10,MAPK11,MAPK4,MYL6,PIK3C2B,PIK3R1,PLCB4,PLCE1,PLCH1,PLCL1,PRKCA
Pulmonary Fibrosis Idiopathic Signaling Pathway	1.89	AJUBA,BCL2,CCND1,COL4A1,COL5A1,COL6A2,COL6A6,FGFR2,FGFR3,FGFRL1,FZD8,IL17RA,ILK,JAG1,JUN,MAPK10,MAPK11,MMP15,MRAS,MRTFA,NFKB1,PIK3C2B,PIK3R1,PINK1,PMAIP1,PRKN,SOS2,TCF7L2,TGFB2
Role of MAPK Signaling in Promoting the Pathogenesis of Influenza	1.89	ATP6V0A1,ATP6V0D1,ATP6V0E2,ATP6V1G2,BCL2,CASP3,JUN,MAPK10,MAPK11,MRAS,NFKB1,PRDX6,PRKCA
NLR signaling pathways	1.87	BCL2,CASP9,CYLD,IKBKB,MAPK11,NFKB1,NLRP1,TXNIP
Senescence Pathway	1.87	CACNA1C,CACNA2D2,CACNB1,CACNB3,CACNG2,CACNG4,CACNG7,CALM1 (includes others),CAPN1,CAPN5,CCND1,CEBPB,E2F5,E2F7,ELK3,IKBKB,JUN,MAPK4,MAPKAPK3,MRAS,NFKB1,PHF1,PIK3C2B,PIK3R1,TGFB2,YPEL3,ZFP36L1
Signaling by Type 1 Insulin-like Growth Factor 1 Receptor (IGF1R)	1.86	IGF2,IRS2,PIK3R1,SHC1
Protein methylation	1.86	CALM1 (includes others),ETFB,PRMT3,RPS2
Dermatan Sulfate Degradation (Metazoa)	1.86	CEMIP,CEMIP2,FGFRL1,IDS
IL-17A Signaling in Gastric Cells	1.84	IL17RA,JUN,MAPK10,MAPK11,NFKB1
D-myo-inositol (1,4,5)-Trisphosphate Biosynthesis	1.84	CDIPT,PIP5K1C,PLCB4,PLCE1,PLCH1
RHOGDI Signaling	1.84	ARHGAP1,ARHGEF10,ARHGEF3,CDH6,CDH7,DIRAS3,GNAO1,GNAZ,GNG2,GRIP1,ITGB3,LIMK1,MRAS,MYL6,PAK3,PIP5K1C,PRKCA,RHOBTB2,RHOQ,RHOU,SRC
Calcium Signaling	1.84	ATP2A3,ATP2B3,CACNA1C,CACNA2D2,CACNB1,CACNB3,CACNG2,CACNG4,CACNG7,CALM1 (includes others),CHRFAM7A,CHRNA3,CHRNA5,CREB5,GRIN3A,GRINA,HDAC11,MYL6,PRKACA,RYR2,TPM1
Cell Cycle: G1/S Checkpoint Regulation	1.83	CCND1,CDKN2D,E2F5,E2F7,GNL3,HDAC11,NRG1,PAK1IP1,TGFB2
CD27 Signaling in Lymphocytes	1.82	CASP3,CASP9,IKBKB,JUN,MAP3K12,MAP3K13,MAPK10,NFKB1
RAF/MAP kinase cascade	1.82	ACTN2,CALM1 (includes others),DLG2,DUSP10,DUSP16,DUSP6,DUSP8,ERBB2,FGF19,FGFR2,FGFR3,GFRA2,IRS2,ITGB3,MRAS,NCAM1,NRG1,PIK3R1,RGL2,SHC1,SPRED3,SPTBN1,SPTBN4,SRC
Neurotrophin/TRK Signaling	1.82	CREB5,JUN,MRAS,NTRK1,NTRK3,PDPK1,PIK3C2B,PIK3R1,SHC1,SOS2
Osteoarthritis Pathway	1.79	ADAMTS4,ALPL,CASP3,CASP9,CEBPB,CREB5,CTNNA2,DKK1,FGFR3,FZD8,ITGB3,JAG1,LRP1,MYBBP1A,NFKB1,OCRL,PGF,SLC39A8,TCF7L2,TIMP3,TNFRSF1A,VEGFB
Caspase activation via Dependence Receptors in the absence of ligand	1.79	CASP3,CASP9,DAPK3
nNOS Signaling in Neurons	1.79	CALM1 (includes others),CAPN1,CAPN5,DLG2,GRIN3A,GRINA,PRKCA
EGF Signaling	1.78	JUN,MAPK11,PIK3C2B,PIK3R1,PRKCA,SHC1,SOS2,SRC
Syndecan interactions	1.77	COL5A1,ITGB3,PRKCA,SDC2,TNC
EPH-Ephrin signaling	1.75	AP2A1,AP2A2,CLTB,EFNA2,EFNB3,KALRN,LIMK1,MYL6,PAK3,SDC2,SRC
Chronic Myeloid Leukemia Signaling	1.75	BCL2,CALM1 (includes others),CASP9,CCND1,E2F5,E2F7,FZD8,GAB2,HDAC11,IKBKB,JUN,LIN28B,MRAS,NFKB1,PIK3C2B,PIK3R1,PLCB4,PLCE1,PLCH1,PLCL1,PTPN13,SOS2,TCF7L2,TGFB2,XPO5
Translocation of SLC2A4 (GLUT4) to the plasma membrane	1.72	CALM1 (includes others),KIFAP3,MYO5A,RHOQ,TBC1D4,TUBA1A,TUBA1C,TUBB2A,TUBB2B
Ribonucleotide Reductase Signaling Pathway	1.72	BCL2,CASP3,CASP9,CCND1,CREB5,E2F5,E2F7,ERBB2,JUN,MAPK10,MAPK11,NFKB1,PARP6,PARP9,PIK3C2B,PIK3R1,SRC
CDP-diacylglycerol Biosynthesis I	1.71	AGPAT4,AGPAT5,CDS2,GPAT4,LPCAT3
Prolactin Signaling	1.69	CEBPB,JUN,KCNMA1,LRRC55,MRAS,PDPK1,PIK3C2B,PIK3R1,PRKCA,SHC1,SOS2
Death Receptor Signaling	1.69	BCL2,CASP3,CASP9,CFLAR,IKBKB,LIMK1,LMNA,NFKB1,PARP6,PARP9,TNFRSF1A
Melatonin Signaling	1.68	CALM1 (includes others),GNAO1,PLCB4,PLCE1,PLCH1,PLCL1,PRKACA,PRKCA,RORB
Assembly of collagen fibrils and other multimeric structures	1.66	CD151,COL14A1,COL4A1,COL5A1,COL6A2,COL6A6,LOX,LOXL1
STAT3 Pathway	1.66	BCL2,FGFR2,FGFR3,IL17RA,INSR,MAP3K12,MAPK10,MAPK11,MRAS,NTRK1,NTRK3,PIM1,SRC,TGFB2
Molecular Mechanisms of Cancer	1.63	ADCY7,ADGRA2,ADGRL1,APC2,ARHGEF10,ARHGEF3,BCL2,CASP3,CASP9,CCKAR,CCND1,CDKN2D,CFLAR,CHRM1,CHRM2,CNR1,CTNNA2,DIRAS3,E2F5,E2F7,FZD8,GAB2,GABBR1,GNAO1,GNAZ,GNG2,GPR137C,GPR153,GPR162,GPR173,GPR26,GPRC5B,GUCY1A1,HDAC11,IL17RA,ITGB3,JUN,LGR5,LPAR3,LRP1,LTB4R,MAPK10,MAPK11,MCHR1,MMP15,MRAS,NFKB1,PAK3,PIK3C2B,PIK3R1,PLCB4,PMAIP1,PRKACA,PRKCA,RHOBTB2,RHOQ,RHOU,S1PR1,SHC1,SOS2,SRC,TCF7L2,TGFB2
Small Cell Lung Cancer Signaling	1.63	BCL2,CASP9,CCND1,E2F5,FHIT,HDAC11,IKBKB,NFKB1,PIK3C2B,PIK3R1,RARB
PEDF Signaling	1.62	BCL2,CFLAR,IKBKB,MAPK11,MRAS,NFKB1,PIK3C2B,PIK3R1,SERPINF1,TCF7L2
Coronavirus Pathogenesis Pathway	1.61	BCL2,CASP3,CASP9,CCND1,E2F5,E2F7,EEF1A2,HDAC11,IKBKB,IL17RA,IRF9,JUN,MAPK10,MAPK11,NFKB1,NPM1,RPS2,RPS6,SIGMAR1
Receptor-type tyrosine-protein phosphatases	1.61	NTRK3,SLITRK1,SLITRK4,SLITRK5
TNFR1 Signaling	1.61	CASP3,CASP9,IKBKB,JUN,NFKB1,PAK3,TNFRSF1A
Mitochondrial Dysfunction	1.59	ATP1A3,ATP1B1,ATP1B2,ATP1B3,BCL2,CACNA1C,CACNA2D2,CACNB1,CACNB3,CACNG2,CACNG4,CACNG7,CALM1 (includes others),CAPN1,CAPN5,CASP3,CASP9,CREB5,DHODH,MAOA,MAPK10,MAPT,PIK3C2B,PIK3R1,PINK1,PPIF,PRDX6,PRKACA,PRKN
Phosphatidylglycerol Biosynthesis II (Non-plastidic)	1.59	AGPAT4,AGPAT5,CDS2,GPAT4,LPCAT3
Protein Sorting Signaling Pathway	1.59	ADCY7,ATP8A2,CLTB,GUCY1A1,PLD3,PLD6,PLPP2,PRKACA,RAB11B,SCARB2,SNX15,SNX24,SNX29,SORT1,SRC,WASHC3,WASHC4
Role of Macrophages, Fibroblasts and Endothelial Cells in Rheumatoid Arthritis	1.57	ADAMTS4,APC2,CALM1 (includes others),CCND1,CEBPB,CREB5,DAAM1,DKK1,FZD8,GNAO1,IKBKB,IL17RA,JUN,LRP1,MRAS,NFKB1,PGF,PIK3C2B,PIK3R1,PLCB4,PLCE1,PLCH1,PLCL1,PRKCA,SRC,TCF7L2,TNFRSF1A,VEGFB
p53 Signaling	1.57	BCL2,CCND1,COQ8A,GNL3,JUN,PIK3C2B,PIK3R1,PMAIP1,RPRM,TP53I3,TP53INP1
NAD Signaling Pathway	1.57	CEBPB,H1-0,HSPD1,LDHA,NFKB1,NMRK1,PARP6,PARP9,PIK3C2B,PIK3R1,RYR2,SIRT2,SLC29A2,SLC29A4,TGFB2
B-WICH complex positively regulates rRNA expression	1.56	DDX21,H2BC9,KAT2A,MYBBP1A,POLR1B,POLR1G,TAF1D
GŒ±s Signaling	1.56	ADCY7,CHRM1,CNGB1,CNR1,CREB5,GNAO1,GNAZ,GNG2,GUCY1A1,MRAS,PRKACA,RYR2,SRC
Sirtuin Signaling Pathway	1.55	ACSS2,ATG4C,ATG9B,CPT1C,CRTC2,DUSP6,GABARAP,H1-0,JUN,KAT2A,LDHA,MAP1LC3B,MAPK4,MYCN,NDRG1,NFKB1,POLR1B,PPIF,RARB,SIRT2,TIMM17B,TIMM8A,TUBA1A,TUBA1C,WRN
Pre-NOTCH Expression and Processing	1.55	ATP2A3,CCND1,H2BC9,JUN,KAT2A,MFNG,RUNX1,ST3GAL3,ST3GAL6
Factors Promoting Cardiogenesis in Vertebrates	1.55	APC2,CCND1,CREB5,DKK1,FZD8,LRP1,MAPK10,PLCB4,PLCE1,PLCH1,PLCL1,PRKCA,SCN5A,TCF7L2,TGFB2
VEGF Signaling	1.54	ACTN2,BCL2,MRAS,PGF,PIK3C2B,PIK3R1,PRKCA,SHC1,SOS2,SRC,VEGFB
PPARŒ±/RXRŒ± Activation	1.54	ADCY7,AP2A2,GUCY1A1,HELZ2,IKBKB,INSR,JUN,MRAS,NFKB1,PLCB4,PLCE1,PLCH1,PLCL1,PRKACA,PRKCA,SHC1,SOS2,TGFB2
Regulation of the Epithelial Mesenchymal Transition by Growth Factors Pathway	1.54	ERBB2,FGF14,FGF19,FGFR2,FGFR3,FGFRL1,IKBKB,JUN,MAPK10,MAPK11,MRAS,NFKB1,PIK3C2B,PIK3R1,SHC1,SOS2,TGFB2,TNFRSF1A
RHO GTPases activate PAKs	1.54	CALM1 (includes others),LIMK1,MYL6,PAK3
Formation of xylulose-5-phosphate	1.54	CRYL1,SORD
Superpathway of Serine and Glycine Biosynthesis I	1.54	PSAT1,SHMT2
Folate Polyglutamylation	1.54	MTHFD1L,SHMT2
Acetate Conversion to Acetyl-CoA	1.54	ACSS1,ACSS2
PIP3 activates AKT signaling	1.54	CASP9,ERBB2,FGF19,FGFR2,FGFR3,GAB2,INSR,IRS2,NRG1,PDPK1,PIK3R1,PIP5K1C,SRC,TSC2
Glioma Signaling	1.53	CALM1 (includes others),CCND1,CDKN2D,E2F5,E2F7,HDAC11,IGF2,MRAS,PIK3C2B,PIK3R1,PRKCA,SHC1,SOS2
D-myo-inositol (1,4,5,6)-Tetrakisphosphate Biosynthesis	1.53	ALPL,DUSP10,DUSP16,DUSP6,DUSP8,EPHX2,MTMR9,NUDT11,OCRL,PALD1,PAWR,PTPN13,PTPRM,PTPRN,PTPRO,SGPP2,SSH2
D-myo-inositol (3,4,5,6)-tetrakisphosphate Biosynthesis	1.53	ALPL,DUSP10,DUSP16,DUSP6,DUSP8,EPHX2,MTMR9,NUDT11,OCRL,PALD1,PAWR,PTPN13,PTPRM,PTPRN,PTPRO,SGPP2,SSH2
RAB GEFs exchange GTP for GDP on RABs	1.52	DENND2A,DENND5B,GDI1,RAB27B,RAB39B,RAB5B,RAB6B,RAB9B,RIN2,TRAPPC9
Role of Chondrocytes in Rheumatoid Arthritis Signaling Pathway	1.52	ADAMTS4,CASP3,CASP9,CEBPB,CFLAR,IL17RA,JUN,LRP1,MAPK11,MMP15,NFKB1,PGF,TNFRSF1A,VEGFB
Beta-catenin independent WNT signaling	1.51	AP2A1,AP2A2,CALM1 (includes others),CLTB,DAAM1,FZD8,GNAO1,GNG2,PRKCA,PRKG1,TCF7L2
Thrombopoietin Signaling	1.51	GAB2,IRS2,JUN,MRAS,PIK3C2B,PIK3R1,PRKCA,SHC1
Prostate Cancer Signaling	1.48	BCL2,CASP9,CCND1,CREB5,E2F5,HDAC11,MRAS,NFKB1,PDPK1,PIK3C2B,PIK3R1,SOS2
Degradation of the extracellular matrix	1.48	ADAMTS4,CAPN1,CASP3,CTSK,ELN,FBN2,MMP15,SCUBE1
WNT/Ca+ pathway	1.48	CREB5,FZD8,NFKB1,PLCB4,PLCE1,PLCH1,PLCL1,PRKCA
Glutamate Receptor Signaling	1.48	CALM1 (includes others),GNG2,GRIK5,GRIN3A,GRINA,GRIP1,SLC17A7,SLC1A3
Apelin Endothelial Signaling Pathway	1.47	ADCY7,CALM1 (includes others),GNAO1,GNAZ,GNG2,GUCY1A1,JUN,MAPK10,MRAS,NFKB1,PIK3C2B,PIK3R1,PLCB4,PRKCA
Apoptosis Signaling	1.46	BCL2,CAPN1,CAPN5,CASP3,CASP9,IKBKB,LMNA,MRAS,NFKB1,PRKCA,TNFRSF1A
Neuregulin Signaling	1.46	ERBB2,ITGB3,MRAS,NRG1,PDPK1,PIK3R1,PRKCA,RPS6,SHC1,SOS2,SRC,TMEFF2
Maturity Onset Diabetes of Young (MODY) Signaling	1.45	CACNA1C,CACNA2D2,CACNB1,CACNB3,CACNG2,CACNG4,CACNG7,INSR,NFKB1
Amino acids regulate mTORC1	1.45	ATP6V0D1,ATP6V0E2,ATP6V1G2,CASTOR2,KICS2,RRAGB,SH3BP4
Pulmonary Healing Signaling Pathway	1.45	CCND1,ETV5,FGFR2,FZD8,JAG1,MAPK10,MAPK11,MMP15,MRAS,NFKB1,PGF,PRKCA,SOS2,SRC,TCF7L2,TGFB2,TNFRSF1A,VEGFB
Cell junction organization	1.44	CADM1,CD151,CDH6,CDH7,CLDN10,CLDN15,FBLIM1,ILK,JUP,SDK2
Elastic fibre formation	1.43	ELN,FBN2,ITGB3,LOX,LOXL1,TGFB2
Glycosaminoglycan metabolism	1.42	B3GNT4,HGSNAT,NCAN,SDC2,SGSH,ST3GAL2,ST3GAL3,ST3GAL6,VCAN
G alpha (12/13) signalling events	1.42	ARHGEF10,ARHGEF10L,ARHGEF3,ARHGEF40,GNG2,KALRN,MCF2L,PLEKHG2,SOS2
IL-7 Signaling Pathway	1.42	BCL2,CCND1,JUN,MAPK11,PDPK1,PIK3C2B,PIK3R1,SHC1,SOS2
HER-2 Signaling in Breast Cancer	1.41	ARF5,ARF6,CASP3,CASP9,CCND1,ELK3,ERBB2,IKBKB,ITGB3,JUN,MRAS,NFKB1,NRG1,PIK3C2B,PIK3R1,PRKCA,RPS6,SOS2,SRC,TSC2
Cholecystokinin/Gastrin-mediated Signaling	1.41	DIRAS3,JUN,MAPK10,MRAS,PLCB4,PRKCA,RHOBTB2,RHOQ,RHOU,SHC1,SOS2,SRC
PAK Signaling	1.41	CASP3,ITGB3,LIMK1,MAPK10,MRAS,MYL6,PAK1IP1,PAK3,PIK3C2B,PIK3R1,SHC1,SOS2
Ceramide Signaling	1.41	BCL2,JUN,MRAS,NFKB1,PIK3C2B,PIK3R1,S1PR1,SMPD1,SMPD3,TNFRSF1A
Oxytocin in Brain Signaling Pathway	1.41	CACNA1C,CACNA2D2,CACNB1,CACNB3,CACNG2,CACNG4,CACNG7,CALM1 (includes others),CREB5,GNAO1,GNG2,MRAS,NFKB1,NLRP1,PIK3C2B,PIK3R1,PRDX6,PRKCA
Triacylglycerol Biosynthesis	1.41	AGPAT4,AGPAT5,GPAT4,LPCAT3,PLPP2,PLPPR2,SIRT2
RAF-independent MAPK1/3 activation	1.41	DUSP10,DUSP16,DUSP6,DUSP8
Role of Osteoblasts, Osteoclasts and Chondrocytes in Rheumatoid Arthritis	1.4	ADAMTS4,ALPL,APC2,BCL2,CALM1 (includes others),CASP9,CTSK,DKK1,FZD8,IKBKB,ITGB3,JUN,LRP1,MAPK10,NFKB1,PIK3C2B,PIK3R1,SRC,TCF7L2,TNFRSF1A
GPER1 signaling	1.38	ADCY7,GNAZ,GNG2,PRKACA,SHC1,SRC
Interleukin-15 signaling	1.38	GAB2,SHC1,SOS2
Sensory processing of sound by inner hair cells of the cochlea	1.38	CACNA2D2,EPB41L1,EPB41L3,KCNMA1,SPTBN1,SYN1,SYP,TRIOBP
4-1BB Signaling in T Lymphocytes	1.38	IKBKB,JUN,MAPK10,MAPK11,NFKB1
TNF signaling	1.37	CFLAR,CLIP3,CYLD,IKBKB,RNF31,SMPD3,TNFRSF1A
Lymphotoxin Œ≤ Receptor Signaling	1.37	CASP3,CASP9,IKBKB,NFKB1,PDPK1,PIK3C2B,PIK3R1
ERBB4 Signaling	1.35	MRAS,NRG1,PDPK1,PIK3C2B,PIK3R1,PRKCA,SHC1,SOS2
Protein Kinase A Signaling	1.33	ADCY7,AKAP6,CALM1 (includes others),CNGB1,CREB5,DUSP10,DUSP16,DUSP6,DUSP8,FICD,GNG2,GUCY1A1,H1-0,MPPED2,MYL6,NFKB1,PDE2A,PLCB4,PLCE1,PLCH1,PLCL1,PLD6,PRKACA,PRKCA,PTPN13,PTPN21,PTPRM,PTPRN,PTPRO,RYR2,TCF7L2,TGFB2
Paxillin Signaling	1.33	ACTN2,ARF6,ITGB3,MAPK10,MAPK11,MRAS,PAK3,PIK3C2B,PIK3R1,SOS2,SRC
Pancreatic Secretion Signaling Pathway	1.32	ADCY7,ARHGEF10,ARHGEF3,ATP2A3,ATP2B3,CA12,CCKAR,GUCY1A1,KCNMA1,NAPB,PIK3C2B,PIK3R1,PLCB4,PLCE1,PLCH1,PLCL1,PRKACA,PRKCA,RYR2,SLC6A6,SRC
3-phosphoinositide Degradation	1.32	ALPL,DUSP10,DUSP16,DUSP6,DUSP8,EPHX2,MTMR9,NUDT11,OCRL,PALD1,PAWR,PTPN13,PTPRM,PTPRN,PTPRO,SGPP2,SSH2
Phagosome Maturation	1.32	ATP6V0A1,ATP6V0D1,ATP6V0E2,ATP6V1G2,CTSC,CTSF,CTSK,NAPB,PRDX5,PRDX6,RAB5B,TUBA1A,TUBA1C,TUBB2A,TUBB2B
FLT3 Signaling in Hematopoietic Progenitor Cells	1.31	CREB5,GAB2,MAPK11,MRAS,PDPK1,PIK3C2B,PIK3R1,SHC1,SOS2
Metabolism of water-soluble vitamins and cofactors	1.3	AOX1,BTD,MTRR,SLC19A2,SLC19A3,SLC2A3,TCN2
Metabolism of nitric oxide: NOS3 activation and regulation	1.3	CALM1 (includes others),CYGB,DDAH2
Ephrin B Signaling	1.29	EFNB3,GNAO1,GNAZ,GNG2,KALRN,LIMK1,MRAS,RGS3
GM-CSF Signaling	1.29	CCND1,MRAS,PIK3C2B,PIK3R1,PIM1,RUNX1,SHC1,SOS2
Retinoic acid Mediated Apoptosis Signaling	1.27	CASP3,CASP9,CFLAR,PARP6,PARP9,RARA,RARB
DHCR24 Signaling Pathway	1.27	CASP3,CLU,MAPT,MRAS,NFKB1,PIK3C2B,PIK3R1,PRKCA,REST,SCARB1,SERPINF1,SREBF2,TM7SF2
Extra-nuclear estrogen signaling	1.26	BCL2,CALM1 (includes others),CCND1,GNG2,PDPK1,PIK3R1,SHC1,SRC
Platelet homeostasis	1.25	ATP2A3,ATP2B3,CALM1 (includes others),GNG2,GUCY1A1,KCNMA1,ORAI2,PDE2A,PRKG1
VEGF Family Ligand-Receptor Interactions	1.25	MRAS,NRP1,PGF,PIK3C2B,PIK3R1,PRKCA,SHC1,SOS2,VEGFB
Sorbitol Degradation I	1.24	SORD
Collagen degradation	1.24	COL14A1,COL4A1,COL5A1,COL6A2,COL6A6,CTSK,MMP15
Estrogen-mediated S-phase Entry	1.24	CCNA1,CCND1,E2F5,E2F7
ROBO SLIT Signaling Pathway	1.23	APBB1,ARF5,ARF6,CABLES1,CASP3,JUN,NRXN1,PAK3,PGF,PRKACA,SRC,VEGFB
LPS-stimulated MAPK Signaling	1.23	IKBKB,JUN,MAPK10,MAPK11,MRAS,NFKB1,PIK3C2B,PIK3R1,PRKCA
Huntington's Disease Signaling	1.21	AP2A2,CAPN1,CAPN5,CASP3,CASP9,CLTB,CREB5,DCTN1,DNM3,GNG2,HDAC11,JUN,NAPB,NTRK1,PDPK1,PIK3C2B,PIK3R1,PLCB4,PRKCA,REST,RPH3A,SHC1,SOS2
Role of JAK2 in Hormone-like Cytokine Signaling	1.21	BCL2,CCND1,IRS2,NPY,PGF,SHC1,VEGFB
MSP-RON Signaling in Cancer Cells Pathway	1.21	CCND1,CREB5,ELK3,JUN,MRAS,NFKB1,PGF,PIK3C2B,PIK3R1,SOS2,SRC,TCF7L2,VEGFB
Signaling by ERBB2	1.2	ERBB2,NRG1,PIK3R1,PRKCA,SHC1,SRC
CDK5 Signaling	1.2	ADCY7,CABLES1,CAPN1,GUCY1A1,LAMA1,MAPK10,MAPK11,MAPK4,MAPT,MRAS,PRKACA
Integrin signaling	1.19	ITGB3,PDPK1,SHC1,SRC
Glycolysis I	1.19	ALDOC,ENO1,ENO2,ENO3
Gluconeogenesis I	1.19	ALDOC,ENO1,ENO2,ENO3
PDGF Signaling	1.18	JUN,MRAS,OCRL,PIK3C2B,PIK3R1,PRKCA,SHC1,SOS2,SRC
Bladder Cancer Signaling	1.17	CCND1,E2F5,ERBB2,FGF14,FGF19,FGFR3,HDAC11,MMP15,MRAS,PGF,VEGFB
Breast Cancer Regulation by Stathmin1	1.17	ADGRA2,ADGRL1,ARHGEF10,ARHGEF3,CCKAR,CCND1,CHRM1,CHRM2,CNR1,CREB5,E2F5,E2F7,FZD8,GABBR1,GNG2,GPR137C,GPR153,GPR162,GPR173,GPR26,GPRC5B,JUN,LGR5,LPAR3,LTB4R,MCHR1,MRAS,NFKB1,PGF,PIK3C2B,PIK3R1,PLCB4,PRKACA,PRKCA,S1PR1,SHC1,SOS2,TGFB2,TUBA1A,TUBA1C,TUBB2A,TUBB2B,VEGFB
Potassium Channels	1.16	GABBR1,GNG2,HCN2,KCND2,KCNH7,KCNJ6,KCNK3,KCNMA1,KCNN1,KCNQ2
MAP kinase activation	1.16	IKBKB,MAPK10,MAPK11,MAPKAPK3,NFKB1
Inhibition of Matrix Metalloproteases	1.16	LRP1,MMP15,SDC2,TIMP2,TIMP3
Regulation of Cellular Mechanics by Calpain Protease	1.15	ACTN2,CAPN1,CAPN5,CCNA1,CCND1,CNGB1,ITGB3,MRAS,SRC
IL-6 Signaling	1.15	CEBPB,IKBKB,JUN,MAPK10,MAPK11,MRAS,NFKB1,PIK3C2B,PIK3R1,SHC1,SOS2,TNFRSF1A
Autophagy	1.15	ATG9B,BCL2,CALM1 (includes others),CREB5,DAPK3,GABARAP,INSR,IRS2,JUN,MAP1LC3B,MAPK10,NFKB1,PIK3C2B,PIK3R1,PRKACA,TGFB2,TNFRSF1A,TSC2
Miro GTPase Cycle	1.14	MYO19,TRAK1
Sphingomyelin Metabolism	1.14	SMPD1,SMPD3
MTOR signalling	1.14	EEF2K,RPS6,RRAGB,TSC2
Synaptic Long Term Potentiation	1.13	CACNA1C,CALM1 (includes others),CREB5,GRIN3A,GRINA,MRAS,PLCB4,PLCE1,PLCH1,PLCL1,PRKACA,PRKCA
Neutrophil degranulation	1.13	ALDOC,AP2A2,APRT,ARL8A,ATP6V0A1,C6orf120,CAPN1,CD59,CPPED1,CRACR2A,CTSC,DNASE1L1,FRMPD3,HGSNAT,IQGAP2,JUP,LGALS3,LTA4H,MVP,NFASC,NFKB1,OSTF1,PNP,PRDX6,RAB3D,RAB5B,RAB9B,SLC2A3,SLC44A2,SVIP,SYNGR1,TIMP2,TOLLIP,VAT1,YPEL5
Neurotransmitter release cycle	1.12	APBA1,MAOA,SLC17A7,SLC1A3,SYN1
Signaling by NOTCH1	1.12	DNER,DTX1,HDAC11,HEYL,JAG1,KAT2A,NEURL1B,TLE5
Induction of Apoptosis by HIV1	1.12	BCL2,CASP3,CASP9,IKBKB,MAPK10,NFKB1,TNFRSF1A
ABRA Signaling Pathway	1.1	DMD,JUND,LIMK1,MAPK10,MRTFA,PGF,SMTN,TPM1,VEGFB
Autism Signaling Pathway	1.1	CACNA1C,CACNA2D2,CACNB1,CACNB3,CACNG2,CACNG4,CACNG7,FZD8,GRIN3A,GRINA,IGF2,MRAS,NRXN1,PIK3C2B,PIK3R1,PRKACA,RARA,RARB,RELN,RPS6,SOS2,TCF7L2,TGFB2,TSC2
IGF-1 Signaling	1.1	CASP9,IRS2,JUN,MRAS,PDPK1,PIK3C2B,PIK3R1,PRKACA,SHC1,SOS2
Antiproliferative Role of Somatostatin Receptor 2	1.09	GNG2,GUCY1A1,MRAS,NPR2,NPR3,PIK3C2B,PIK3R1,SRC
HGF Signaling	1.09	CCND1,ELK3,ITGB3,JUN,MAP3K12,MAP3K13,MAPK10,MRAS,PIK3C2B,PIK3R1,PRKCA,SOS2
Activation of gene expression by SREBF (SREBP)	1.09	HELZ2,MVK,NCOA1,SREBF2,TM7SF2
Transport of vitamins, nucleosides, and related molecules	1.09	ARL2,SLC29A2,SLC29A4,SLCO3A1,SLCO4A1
Pyroptosis Signaling Pathway	1.08	CASP3,CASP9,GSDME,MAPK11,NFKB1,NLRP1,PRKACA,TNFRSF1A,TXNIP
Cargo recognition for clathrin-mediated endocytosis	1.07	AP2A1,AP2A2,CHRM2,CLTB,SCARB2,SGIP1,SNAP91,SYT11,SYT9,TFRC
GŒ±12/13 Signaling	1.07	CDH6,CDH7,IKBKB,JUN,LPAR3,MAPK10,MRAS,MYL6,NFKB1,PIK3C2B,PIK3R1,SRC
Production of Nitric Oxide and Reactive Oxygen Species in Macrophages	1.07	CLU,DIRAS3,IKBKB,JUN,MAP3K12,MAP3K13,MAPK10,MAPK11,NFKB1,PIK3C2B,PIK3R1,PRKCA,RHOBTB2,RHOQ,RHOU,TNFRSF1A
UVB-Induced MAPK Signaling	1.07	JUN,MAPK10,MAPK11,PIK3C2B,PIK3R1,PRKCA
Collagen biosynthesis and modifying enzymes	1.06	COL14A1,COL4A1,COL5A1,COL6A2,COL6A6,COLGALT2,P4HA1
FcŒ≥ Receptor-mediated Phagocytosis in Macrophages and Monocytes	1.06	ARF6,GAB2,MYO5A,PIK3R1,PLD3,PLD6,PRKCA,RAB11B,SRC
CCR3 Signaling in Eosinophils	1.06	CALM1 (includes others),GNAO1,GNAZ,GNG2,LIMK1,MAPK11,MRAS,PAK3,PIK3C2B,PIK3R1,PLCB4,PRKCA
Hepatic Fibrosis / Hepatic Stellate Cell Activation	1.05	BCL2,COL4A1,COL5A1,COL6A2,COL6A6,ECE1,FGFR2,IGF2,LAMA1,MYL6,NFKB1,PGF,TGFB2,TIMP2,TNFRSF1A,VEGFB
Mitophagy	1.05	MAP1LC3B,PINK1,PRKN,SRC
April Mediated Signaling	1.05	IKBKB,JUN,MAPK10,MAPK11,NFKB1
Role of Tissue Factor in Cancer	1.05	BCL2,CASP3,IKBKB,ITGB3,JUN,LIMK1,MAPK10,MAPK11,MAPK4,MRAS,NFKB1,PIK3C2B,PIK3R1,PRKCA,SRC,TGFB2,TNFRSF1A
Phosphatidylethanolamine Biosynthesis II	1.05	CHKB,ETNK2
Leucine Degradation I	1.05	BCAT1,HMGCLL1
Folate Transformations I	1.05	MTHFD1L,SHMT2
Chemokine Signaling	1.05	CALM1 (includes others),JUN,LIMK1,MAPK11,MRAS,PLCB4,PRKCA,SRC
Leukocyte Extravasation Signaling	1.04	ACTN2,ARHGAP1,CLDN10,CLDN15,CTNNA2,JAM3,MAPK10,MAPK11,MMP15,MYL6,PIK3C2B,PIK3R1,PRKCA,SRC,TIMP2,TIMP3
Intrinsic Pathway for Apoptosis	1.04	BCL2,C1QBP,CASP3,CASP9,GSDME,PMAIP1
IL-15 Production	1.03	ALK,DDR1,ERBB2,FGFR2,FGFR3,INSR,NFKB1,NTRK1,NTRK3,SRC,TNK2
HIF1Œ± Signaling	1.02	CCNG2,EGLN3,IGF2,JUN,LDHA,MKNK2,MMP15,MRAS,NCOA1,PGF,PIK3C2B,PIK3R1,PRKCA,RPS6,SLC2A3,TGFB2,VEGFB
Aggrephagy	1.02	PRKN,TUBA1A,TUBA1C,TUBB2A,TUBB2B
B Cell Activating Factor Signaling	1.02	IKBKB,JUN,MAPK10,MAPK11,NFKB1
Pyrimidine Ribonucleotides De Novo Biosynthesis	1.02	ABCE1,AK1,AK4,DHODH,SLC25A42
TGF-Œ≤ Signaling	1.02	BCL2,JUN,MAPK11,MRAS,SOS2,TFE3,TGFB2,TGIF1,ZNF423
CD40 Signaling	1.01	IKBKB,JUN,MAPK10,MAPK11,NFKB1,PIK3C2B,PIK3R1
Agrin Interactions at Neuromuscular Junction	1.01	ERBB2,JUN,MAPK10,MRAS,NRG1,PAK3,SRC
IL-17A Signaling in Airway Cells	1.01	IKBKB,IL17RA,MAPK10,MAPK11,NFKB1,PIK3C2B,PIK3R1
Phospholipases	1.01	PLCB4,PLCE1,PLCH1,PLCL1,PLD3,PLD6,PRDX6
Signaling by CSF1 (M-CSF) in myeloid cells	1.01	GAB2,PIK3R1,SHC1,SRC
RAC Signaling	1	ANK1,IQGAP2,ITGB3,JUN,LIMK1,MCF2L,MRAS,NFKB1,PAK3,PIK3C2B,PIK3R1,PIP5K1C
Adipogenesis pathway	1	CEBPB,FGFR2,FGFR3,FGFRL1,FZD8,HDAC11,KAT2A,NR2F2,SIRT2,TNFRSF1A,TXNIP,ZNF423
Neuroinflammation Signaling Pathway	0.995	BCL2,CALB1,CASP3,CD200,CFLAR,CREB5,GABBR1,GABRA2,GABRA5,GRIN3A,GRINA,IKBKB,JUN,KCNJ6,MAPK10,MAPK11,MAPK4,MAPT,NFKB1,PIK3C2B,PIK3R1,SLC1A3,TGFB2,TNFRSF1A
Signaling by Hippo	0.99	AMOTL2,CASP3,WWC1
HMGB1 Signaling	0.987	DIRAS3,JUN,KAT2A,MAPK10,MAPK11,MRAS,NFKB1,PIK3C2B,PIK3R1,RHOBTB2,RHOQ,RHOU,TGFB2,TNFRSF1A
Insulin Receptor Signaling	0.986	INSR,IRS2,MRAS,OCRL,PDPK1,PIK3C2B,PIK3R1,PRKACA,RHOQ,SHC1,SOS2,TSC2
Collagen chain trimerization	0.984	COL14A1,COL4A1,COL5A1,COL6A2,COL6A6
mTOR Signaling	0.98	DIRAS3,INSR,MRAS,PDPK1,PGF,PIK3C2B,PIK3R1,PLD3,PLD6,PRKCA,RHOBTB2,RHOQ,RHOU,RPS2,RPS6,TSC2,VEGFB
Estrogen-Dependent Breast Cancer Signaling	0.977	CCND1,CREB5,JUN,MRAS,NFKB1,PIK3C2B,PIK3R1,SRC
JAK/STAT Signaling	0.977	CEBPB,JUN,MRAS,NFKB1,PIK3C2B,PIK3R1,SHC1,SOS2
RIPK1-mediated regulated necrosis	0.972	CFLAR,FLOT1,FLOT2,PRKN
Role of p14/p19ARF in Tumor Suppression	0.972	NPM1,NPM3,PIK3C2B,PIK3R1
Neurotransmitter clearance	0.968	BCHE,MAOA
Calcium Transport I	0.968	ATP2A3,ATP2B3
PI3K/AKT Signaling	0.967	BCL2,CCND1,GAB2,IKBKB,IL17RA,ILK,ITGB3,MAPK8IP1,MRAS,NFKB1,OCRL,PDPK1,PIK3R1,SHC1,SOS2,TSC2
Œ≤-alanine Degradation I	0.956	ABAT
Spermidine Biosynthesis I	0.956	SRM
Xanthine and Xanthosine Salvage	0.956	PNP
Putrescine Biosynthesis III	0.956	ODC1
Glycine Biosynthesis I	0.956	SHMT2
Cyclins and Cell Cycle Regulation	0.955	CCNA1,CCND1,CDKN2D,E2F5,E2F7,HDAC11,MYT1,TGFB2
Signaling by PDGF	0.953	COL4A1,COL5A1,COL6A2,COL6A6,PIK3R1,SRC
Iron uptake and transport	0.953	ATP6V0A1,ATP6V0D1,ATP6V0E2,ATP6V1G2,SLC22A17,TFRC
MAPK targets/ Nuclear events mediated by MAP kinases	0.935	DUSP6,JUN,MAPK10,MAPK11
Oxidative Stress Induced Senescence	0.933	CBX4,CBX6,CDKN2D,H2BC9,JUN,MAPK10,MAPK11,MAPKAPK3
GP6 Signaling Pathway	0.927	CALM1 (includes others),COL4A1,COL5A1,COL6A2,COL6A6,ITGB3,LAMA1,PDPK1,PIK3C2B,PIK3R1,PRKCA
Role of IL-17A in Arthritis	0.926	IL17RA,MAPK10,MAPK11,NFKB1,PIK3C2B,PIK3R1
Human Embryonic Stem Cell Pluripotency	0.926	APC2,FGFR2,FGFR3,FGFRL1,FZD8,ID4,MRAS,NTRK1,NTRK3,PDPK1,PIK3C2B,PIK3R1,PRKCA,REST,SOS2,TGFB2
WNT/Œ≤-catenin Signaling	0.913	APC2,CCND1,DKK1,FZD8,GNAO1,ILK,JUN,LRP1,RARA,RARB,SOX4,SRC,TCF7L2,TGFB2
GABA receptor activation	0.901	ADCY7,GABBR1,GABRA2,GABRA5,GNG2,KCNJ6
Ovarian Cancer Signaling	0.9	BCL2,CCND1,E2F5,FZD8,HDAC11,MRAS,PGF,PIK3C2B,PIK3R1,PRKACA,SRC,TCF7L2,VEGFB
RHO GTPases activate KTN1	0.896	KIF5A,KLC1
Interconversion of nucleotide di- and triphosphates	0.895	AK1,AK4,GLRX
iNOS Signaling	0.893	CALM1 (includes others),IKBKB,JUN,MAPK11,NFKB1
Apelin Pancreas Signaling Pathway	0.893	MAPK10,NFKB1,PIK3C2B,PIK3R1,PRKACA
Wound Healing Signaling Pathway	0.884	CEBPB,COL4A1,COL5A1,COL6A2,COL6A6,FGFR2,IKBKB,JUN,LAMA1,MAPK10,MRAS,NFKB1,PGF,PRKCA,SHC1,SOS2,TGFB2,TNFRSF1A,VEGFB
Caveolar-mediated Endocytosis Signaling	0.87	FLOT1,FLOT2,INSR,ITGB3,PRKCA,RAB5B,SRC
Oxytocin in Spinal Neurons Signaling Pathway	0.865	GUCY1A1,NPR2,NPR3,PRKG1
Methionine Degradation I (to Homocysteine)	0.852	EEF1AKMT3,MGMT,PRMT3
Vitamin-C Transport	0.852	GLRX,SLC2A3,TXNRD2
Immunogenic Cell Death Signaling Pathway	0.852	BCL2,CASP3,CASP9,CFLAR,DAPK3,LRP1,NFKB1,TNFRSF1A
Unfolded protein response	0.852	BCL2,CEBPB,DNAJB2,DNAJB5,DNAJC12,DNAJC4,PPP1R15A,SREBF2
GP1b-IX-V activation signalling	0.833	PIK3R1,SRC
Virus Entry via Endocytic Pathways	0.833	AP2A1,AP2A2,CLTB,ITGB3,MRAS,PIK3C2B,PIK3R1,PRKCA,SRC,TFRC
Striated Muscle Contraction	0.833	ACTN2,DMD,TMOD1,TPM1
Transcriptional regulation by the AP-2 (TFAP2) family of transcription factors	0.833	ERBB2,HSPD1,KDM5B,NPM1
IL-9 Signaling	0.833	IRS2,NFKB1,PIK3C2B,PIK3R1
Macropinocytosis Signaling	0.828	ARF6,ITGB3,MRAS,PIK3C2B,PIK3R1,PRKCA,SRC
WNK Renal Signaling Pathway	0.823	CALM1 (includes others),INSR,IRS2,NPR3,PIK3C2B,PIK3R1,PRKCA,PRKN,SLC12A6
Mouse Embryonic Stem Cell Pluripotency	0.823	APC2,FZD8,ID4,MAPK11,MRAS,PIK3C2B,PIK3R1,SOS2,TCF7L2
Role of PKR in Interferon Induction and Antiviral Response	0.814	CASP3,CASP9,IKBKB,IRF9,JUN,MAPK10,MAPK11,NFKB1,NLRP1,NPM1,TNFRSF1A
Regulation of RUNX1 Expression and Activity	0.812	CCND1,RUNX1,SRC
Signaling by NOTCH3	0.811	HEYL,JAG1,KAT2A,NEURL1B,WWC1
FAT10 Cancer Signaling Pathway	0.811	IKBKB,NFKB1,TCF7L2,TGFB2,TNFRSF1A
Regulation of the Epithelial-Mesenchymal Transition Pathway	0.808	FGF14,FGF19,FGFR2,FGFR3,FGFRL1,FZD8,JAG1,LOX,MRAS,NFKB1,PIK3C2B,PIK3R1,SOS2,TCF7L2,TGFB2
VDR/RXR Activation	0.807	CALB1,CEBPB,HR,MXD1,NCOA1,PRKCA,TGFB2
Angiopoietin Signaling	0.807	CASP9,IKBKB,MRAS,NFKB1,PAK3,PIK3C2B,PIK3R1
IL-2 Signaling	0.805	JUN,MRAS,PIK3C2B,PIK3R1,SHC1,SOS2
Post-translational protein phosphorylation	0.805	ANO8,CHRDL1,FAM20C,RCN1,SCG2,SDC2,SHISA5,TNC,VCAN
PPAR Signaling	0.805	IKBKB,INSR,JUN,MRAS,NCOA1,NFKB1,SHC1,SOS2,TNFRSF1A
TWEAK Signaling	0.802	CASP3,CASP9,IKBKB,NFKB1
RHO GTPases regulate CFTR trafficking	0.792	RHOQ
Transcription from mitochondrial promoters	0.792	TFB2M
Intracellular oxygen transport	0.792	CYGB
Methylglyoxal Degradation I	0.792	HAGH
Serine Biosynthesis	0.792	PSAT1
Guanine and Guanosine Salvage I	0.792	PNP
S-methyl-5'-thioadenosine Degradation II	0.792	MTAP
Ascorbate Recycling (Cytosolic)	0.792	GLRX
Tetrahydrobiopterin Biosynthesis I	0.792	GCH1
Inosine-5'-phosphate Biosynthesis II	0.792	PAICS
Uridine-5'-phosphate Biosynthesis	0.792	DHODH
Tetrahydrobiopterin Biosynthesis II	0.792	GCH1
Tyrosine Biosynthesis IV	0.792	PCBD2
4-aminobutyrate Degradation I	0.792	ABAT
Amyloid Processing	0.786	CAPN1,CAPN5,MAPK11,MAPT,PRKACA
Macroautophagy	0.783	ATG4C,ATG9B,GABARAP,MAP1LC3B,RRAGB,TSC2
Azathioprine ADME	0.777	ABCC4,SLC29A2
Assembly of RNA Polymerase I Complex	0.777	POLR1B,TAF1D
Guanosine Nucleotides Degradation III	0.777	NT5C2,PNP
Insulin processing	0.774	KIF5A,KIF5C,MYO5A
Signaling by NTRK2 (TRKB)	0.774	PIK3R1,SHC1,SRC
Signaling by Erythropoietin	0.774	IRS2,PIK3R1,SHC1
Ethanol Degradation IV	0.774	ACSS1,ACSS2,CYGB
Cysteine Biosynthesis III (mammalia)	0.774	EEF1AKMT3,MGMT,PRMT3
Œ±-Adrenergic Signaling	0.772	ADCY7,CALM1 (includes others),GNAO1,GNAZ,GNG2,GUCY1A1,MRAS,PRKACA,PRKCA
Regulation of Insulin-like Growth Factor (IGF) transport and uptake by IGFBPs	0.77	ANO8,CHRDL1,FAM20C,IGF2,RCN1,SCG2,SDC2,SHISA5,TNC,VCAN
NF-Œ∫B Activation by Viruses	0.768	IKBKB,ITGB3,MRAS,NFKB1,PIK3C2B,PIK3R1,PRKCA
Acute Phase Response Signaling	0.766	CEBPB,IKBKB,JUN,MAPK11,MRAS,NFKB1,NOLC1,PDPK1,PIK3R1,SERPINF1,SERPING1,SHC1,SOS2,TNFRSF1A
Melanoma Signaling	0.761	CCND1,MITF,MRAS,PIK3C2B,PIK3R1
Telomerase Signaling	0.756	DKC1,ELK3,HDAC11,MRAS,PDPK1,PIK3C2B,PIK3R1,SHC1,SOS2
IL-3 Signaling	0.749	GAB2,JUN,MRAS,PIK3C2B,PIK3R1,PRKCA,SHC1
Renal Cell Carcinoma Signaling	0.749	EGLN3,JUN,MRAS,PAK3,PIK3C2B,PIK3R1,SOS2
NGF-stimulated transcription	0.744	CDK5R2,ID4,JUND,REST
O-linked glycosylation	0.74	ADAMTS20,ADAMTS4,ADAMTS7,ADAMTSL1,B3GALNT2,B3GNT4,GALNT17,ST3GAL2,ST3GAL3
Activin Inhibin Signaling Pathway	0.732	CCNA1,CEBPB,EGLN3,IKBKB,JUN,LIMK1,MAPK10,MAPK11,MAPK4,MXD1,NFKB1,PIK3C2B,PIK3R1,TCF7L2,TGFB2,TNFRSF1A
Acetylcholine binding and downstream events	0.726	CHRNA3,CHRNA5
LGI-ADAM interactions	0.726	CACNG2,CACNG4
Aspirin ADME	0.726	BCHE,SLC16A1
Urate Biosynthesis/Inosine 5'-phosphate Degradation	0.726	NT5C2,PNP
Signaling by FGFR3	0.717	FGFR3,PIK3R1,SHC1,SRC
Transcriptional Regulation by VENTX	0.717	CCND1,CEBPB,NFKB1,TCF7L2
Pyrimidine Ribonucleotides Interconversion	0.717	ABCE1,AK1,AK4,SLC25A42
ATF4 activates genes in response to endoplasmic reticulum stress	0.705	CEBPB,EXOSC5,EXOSC7
NAD Salvage Pathway II	0.705	ACP2,NMRK1,NT5C2
Transcriptional regulation of white adipocyte differentiation	0.695	CEBPB,FAM120B,HELZ2,NCOA1,NFKB1,NR2F2,SREBF2
Role of MAPK Signaling in the Pathogenesis of Influenza	0.695	BCL2,CASP3,MAPK10,MAPK11,MRAS,PRDX6,PRKCA
HSP90 chaperone cycle for steroid hormone receptors in the presence of ligand	0.692	DCTN1,TUBA1A,TUBA1C,TUBB2A,TUBB2B
Interleukin-3, Interleukin-5 and GM-CSF signaling	0.692	GAB2,OCRL,PIK3R1,PRKACA,SHC1
Sensory processing of sound by outer hair cells of the cochlea	0.692	EPB41L1,EPB41L3,KCNMA1,SPTBN1,TRIOBP
DAG and IP3 signaling	0.691	ADCY7,CALM1 (includes others),PRKACA,PRKCA
Gamma carboxylation, hypusine formation and arylsulfatase activation	0.691	ARSD,ARSJ,DPH2,STS
Signaling by FGFR4	0.691	FGF19,PIK3R1,SHC1,SRC
RNA Polymerase III Transcription	0.691	BRF1,POLR3E,POLR3G,SNAPC1
Neurotransmitter uptake and metabolism In glial cells	0.679	SLC1A3
Threonine catabolism	0.679	RIDA
Catecholamine Biosynthesis	0.679	DDC
Glutathione Redox Reactions II	0.679	GLRX
D-glucuronate Degradation I	0.679	CRYL1
Melatonin Degradation II	0.679	MAOA
N-acetylglucosamine Degradation II	0.679	NAGK
Phenylalanine Degradation I (Aerobic)	0.679	PCBD2
Regulation of Actin-based Motility by Rho	0.679	DIRAS3,ITGB3,LIMK1,MYL6,PAK3,PIP5K1C,RHOBTB2,RHOQ,RHOU
Response of EIF2AK1 (HRI) to heme deficiency	0.679	CEBPB,PPP1R15A
Integrin cell surface interactions	0.677	COL4A1,COL5A1,COL6A2,COL6A6,ITGB3,JAM3,TNC
RHO GTPases activate PKNs	0.673	MYL6,PDPK1,PKN3
CSDE1 Signaling Pathway	0.671	DCP1A,PABPC1,PABPC3,PABPC5,TNC
Erythropoietin Signaling Pathway	0.665	CCND1,IRS2,JUN,MRAS,NFKB1,PDPK1,PIK3C2B,PIK3R1,PRKCA,SHC1,SOS2,SRC,TGFB2
Sphingolipid metabolism	0.644	ARSD,ARSJ,B4GALNT1,SGPP2,SMPD1,SMPD3,STS
fMLP Signaling in Neutrophils	0.643	CALM1 (includes others),GNAO1,GNAZ,GNG2,MRAS,NFKB1,PIK3C2B,PIK3R1,PLCB4,PRKCA
Tight Junction Signaling	0.643	CLDN10,CLDN15,CNKSR3,JAM3,JUN,MAGI2,MYL6,NAPB,NFKB1,PRKACA,TGFB2,TNFRSF1A,YBX3
Signaling by SCF-KIT	0.642	GAB2,PIK3R1,PRKCA,SRC
Smooth Muscle Contraction	0.642	CALM1 (includes others),GUCY1A1,MYL6,TPM1
Rap1 signalling	0.637	PRKACA,PRKG1
Granzyme B Signaling	0.637	CASP3,CASP9
Chondroitin Sulfate Degradation (Metazoa)	0.637	CEMIP,CEMIP2
Adenosine Nucleotides Degradation II	0.637	NT5C2,PNP
Transcriptional Regulatory Network in Embryonic Stem Cells	0.634	CALB1,FGFR2,FGFR3,FGFRL1,FZD8,IGF2,L1CAM,MRAS,PIK3C2B,PIK3R1,REST,TGFB2
Sumoylation Pathway	0.632	CBX4,DIRAS3,JUN,MAPK10,NFKB1,RHOBTB2,RHOQ,RHOU
Actin Cytoskeleton Signaling	0.63	ACTN2,APC2,FGF14,FGF19,IQGAP2,ITGB3,LIMK1,MRAS,MYL6,PAK3,PIK3C2B,PIK3R1,PIP5K1C,SHC1,SOS2,SSH2,TMSB10/TMSB4X
Senescence-Associated Secretory Phenotype (SASP)	0.627	CCNA1,CDKN2D,CEBPB,H2BC9,JUN,NFKB1
Role of Osteoblasts in Rheumatoid Arthritis Signaling Pathway	0.62	ALPL,APC2,BCL2,CTSC,CTSF,CTSK,DKK1,FZD8,LRP1,MMP15,PGF,PIK3C2B,PIK3R1,SRC,TCF7L2,TGFB2,VEGFB
SUMOylation of transcription cofactors	0.618	CBX4,MRTFA,NCOA1,NPM1
TP53 Regulates Transcription of Cell Death Genes	0.618	NDRG1,PMAIP1,TP53I3,TP53INP1
Activation of kainate receptors upon glutamate binding	0.615	CALM1 (includes others),GNG2,GRIK5
Polyamine Regulation in Colon Cancer	0.611	JUN,MXD1,ODC1,SRM,TCF7L2
Fc Epsilon RI Signaling	0.61	MAPK10,MAPK11,MRAS,OCRL,PDPK1,PIK3C2B,PIK3R1,PRKCA,SOS2
p38 MAPK Signaling	0.61	CREB5,DUSP10,EEF2K,MAPK11,MAPKAPK3,MAPT,MKNK2,TGFB2,TNFRSF1A
FOXO-mediated transcription of cell cycle genes	0.598	CCNG2,PCBP4
MSP-RON Signaling in Macrophages Pathway	0.597	CREB5,GAB2,IKBKB,JUN,MRAS,NFKB1,PIK3C2B,PIK3R1,SOS2
Coronavirus Replication Pathway	0.596	TUBA1A,TUBA1C,TUBB2A,TUBB2B
Reelin signalling pathway	0.595	RELN
Arsenate Detoxification I (Glutaredoxin)	0.595	PNP
Tetrahydrofolate Salvage from 5,10-methenyltetrahydrofolate	0.595	MTHFD1L
CMP-N-acetylneuraminate Biosynthesis I (Eukaryotes)	0.595	NAGK
Lysine Degradation II	0.595	AASS
Citrulline-Nitric Oxide Cycle	0.595	ASL
dTMP De Novo Biosynthesis	0.595	SHMT2
Tyrosine Degradation I	0.595	FAH
Glutamate Degradation III (via 4-aminobutyrate)	0.595	ABAT
Iron homeostasis signaling pathway	0.593	ATP6V0A1,ATP6V0D1,ATP6V0E2,ATP6V1G2,HIF3A,LRP1,SLC25A37,SLC39A14,SLC48A1,TFRC
GADD45 Signaling	0.592	CCND1,MAPK10,MAPK11,NFKB1,TGFB2
PCP (Planar Cell Polarity) Pathway	0.592	DAAM1,FZD8,JUN,JUND,MAPK10
ERK/MAPK Signaling	0.591	CREB5,DUSP6,ELK3,ITGB3,MKNK2,MRAS,MYCN,PAK3,PIK3C2B,PIK3R1,PRKACA,PRKCA,SHC1,SOS2,SRC
Cilium Assembly	0.59	BBS12,CNGB1,DCTN1,IFT22,KIF3C,KIFAP3,MARK4,MCHR1,PRKACA,TUBA1A,TUBA1C,TUBB2A,TUBB2B,WDR35
Bile acid and bile salt metabolism	0.588	AKR1C1/AKR1C2,NCOA1,OSBPL2
BMP signaling pathway	0.582	JUN,MAPK10,MAPK11,MRAS,NFKB1,PRKACA,ZNF423
Apelin Adipocyte Signaling Pathway	0.582	ADCY7,GUCY1A1,MAPK10,MAPK11,MAPK4,PRDX6,PRKACA
RAR Activation	0.58	ADCY7,CNGB1,CREB5,DIRAS3,DKK1,FICD,GUCY1A1,JUN,MAPK10,MAPK11,MPPED2,NCOA1,NFKB1,NR2F2,PDE2A,PDPK1,PIK3C2B,PIK3R1,PLD6,PRKACA,RARA,RARB,RHOBTB2,RHOQ,RHOU,RORB,SRC,TGFB2
Interleukin-2 family signaling	0.575	GAB2,OCRL,PIK3R1,SHC1
Heme signaling	0.575	CRTC1,CRTC2,HELZ2,NCOA1
Role of OCT4 in Mammalian Embryonic Stem Cell Pluripotency	0.575	KDM5B,NR2F2,RARA,REST
tRNA Splicing	0.575	FICD,MPPED2,PDE2A,PLD6
DNA damage-induced 14-3-3œÉ Signaling	0.575	BCL2,CASP3,CASP9,RAD1
Necroptosis Signaling Pathway	0.569	CAPN1,CAPN5,CFLAR,CYLD,IKBKB,IRF9,PPIF,RNF31,TIMM17B,TIMM8A,TNFRSF1A
RORA activates gene expression	0.562	HELZ2,NCOA1
TNFR2 Signaling	0.562	IKBKB,JUN,NFKB1
Actin Nucleation by ARP-WASP Complex	0.554	DIRAS3,ITGB3,MRAS,RHOBTB2,RHOQ,RHOU,SOS2
Activation of Matrix Metalloproteinases	0.538	CTSK,MMP15,TIMP2
Interleukin-4 and Interleukin-13 signaling	0.537	BCL2,CCND1,FSCN1,MAOA,PIK3R1,PIM1,RHOU,S1PR1
Hepatic Cholestasis	0.536	ADCY7,CALM1 (includes others),FGF19,GUCY1A1,IKBKB,INSR,JUN,MAPK10,NFKB1,PPRC1,PRKACA,PRKCA,RARA,TGFB2,TNFRSF1A
XBP1(S) activates chaperone genes	0.535	ATP6V0D1,DCTN1,LMNA,SHC1
G alpha (z) signalling events	0.535	ADCY7,GNAZ,GNG2,PRKCA
Apelin Muscle Signaling Pathway	0.535	GNAO1,GNAZ,GNG2,MRAS
IL-23 Signaling Pathway	0.535	NFKB1,PIK3C2B,PIK3R1,RUNX1
Signaling by MET	0.531	ARF6,COL5A1,LAMA1,PIK3R1,SHC1,SRC
Role of JAK family kinases in IL-6-type Cytokine Signaling	0.531	CCND1,MAPK10,MAPK11,PGF,TGFB2,VEGFB
Role of MAPK Signaling in Inhibiting the Pathogenesis of Influenza	0.531	CASP3,JUN,MAPK10,MAPK11,NFKB1,PRDX6
RHO GTPases Activate ROCKs	0.529	LIMK1,MYL6
Metabolism of cofactors	0.529	CALM1 (includes others),GCH1
Purine Nucleotides Degradation II (Aerobic)	0.529	NT5C2,PNP
Fructose metabolism	0.528	SORD
Arginine Biosynthesis IV	0.528	ASL
Pyruvate Fermentation to Lactate	0.528	LDHA
Serotonin and Melatonin Biosynthesis	0.528	DDC
Pentose Phosphate Pathway (Non-oxidative Branch)	0.528	RPIA
Glycine Cleavage Complex	0.528	GLDC
Zymosterol Biosynthesis	0.528	TM7SF2
GDP-mannose Biosynthesis	0.528	PMM1
Mitochondrial protein import	0.522	CMC4,GRPEL1,HSPD1,TIMM17B,TIMM8A
Dopamine Receptor Signaling	0.516	ADCY7,DDC,GCH1,GUCY1A1,MAOA,PRKACA
TP53 Regulates Transcription of Cell Cycle Genes	0.516	CCNA1,E2F7,NPM1,PCBP4
Ephrin A Signaling	0.516	EFNA2,LIMK1,PIK3C2B,PIK3R1
PFKFB4 Signaling Pathway	0.516	CREB5,PFKFB4,PRKACA,TGFB2
Cargo concentration in the ER	0.515	CD59,CNIH2,CTSC
Activation of IRF by Cytosolic Pattern Recognition Receptors	0.506	IKBKB,IRF9,JUN,MAPK10,NFKB1
Activation of anterior HOX genes in hindbrain during early embryogenesis	0.502	AJUBA,H2BC9,JUN,MAFB,RARA,RARB
Valine Degradation I	0.499	ABAT,BCAT1
Inflammasome pathway	0.499	NFKB1,NLRP1
Netrin-1 signaling	0.498	ABLIM1,MAPK11,SRC,UNC5C
Signaling by FGFR1	0.498	FGFRL1,PIK3R1,SHC1,SRC
RNA Polymerase I Transcription	0.498	KAT2A,POLR1B,POLR1G,TAF1D
Ethanol Degradation II	0.493	ACSS1,ACSS2,DHRS2
PI Metabolism	0.488	MTMR9,OCRL,PIK3C2B,PIK3R1,PIP5K1C,PTPN13
Ferroptosis Signaling Pathway	0.48	ARF5,ARF6,GCH1,LPCAT3,MRAS,SLC39A14,SLC39A8,SREBF2,TFRC
Transcriptional regulation by RUNX2	0.48	CCND1,LGALS3,RUNX1,SRC
Transcriptional regulation of granulopoiesis	0.48	CEBPB,H2BC9,RARA,RUNX1
TYSND1 cleaves peroxisomal proteins	0.473	TYSND1
STAT5 Activation	0.473	GAB2
Urea Cycle	0.473	ASL
Thioredoxin Pathway	0.473	TXNRD2
NAD Salvage Pathway III	0.473	NMRK1
Adenine and Adenosine Salvage III	0.473	PNP
Interleukin-7 signaling	0.471	IRS2,PIK3R1
Synaptic adhesion-like molecules	0.471	FLOT1,FLOT2
Endoplasmic Reticulum Stress Pathway	0.471	CASP3,CASP9
EIF2 Signaling	0.47	BCL2,CCND1,INSR,MRAS,MYCN,PABPC1,PDPK1,PIK3C2B,PIK3R1,PPP1R15A,RPL35,RPS2,RPS6,SHC1,SOS2
Signaling by ROBO receptors	0.466	CLASP2,NRP1,PAK3,PRKACA,PRKCA,SOS2,SRC,ZSWIM8
Apoptotic execution phase	0.463	CASP3,H1-0,LMNA,MAPT
TCF dependent signaling in response to WNT	0.46	BCL9L,CCDC88C,CTNNBIP1,CXXC4,DKK1,FRAT2,FZD8,H2BC9,HECW1,LGR5,SOX4,TCF7L2,TLE5
Detoxification of Reactive Oxygen Species	0.452	PRDX5,PRDX6,TXNRD2
Complement System	0.452	C1QBP,CD59,SERPING1
Signaling by TGF-beta Receptor Complex	0.447	ITGB3,NEDD4L,PPP1R15A,TGFB2
IL-13 Signaling Pathway	0.445	IL17RA,JUN,MAOA,MAPK11,PIK3C2B,PIK3R1,SRC,TGFB2
Cellular hexose transport	0.444	SLC2A11,SLC2A3
RHO GTPases Activate NADPH Oxidases	0.444	MAPK11,PRKCA
Role of JAK1 and JAK3 in Œ≥c Cytokine Signaling	0.433	IRS2,MRAS,PIK3C2B,PIK3R1,SHC1
Cell Cycle Regulation by BTG Family Proteins	0.433	CCND1,E2F5,E2F7
Superpathway of Methionine Degradation	0.433	EEF1AKMT3,MGMT,PRMT3
Notch Signaling	0.433	DTX1,JAG1,MFNG
Phototransduction Pathway	0.431	CNGB1,GUCY1A1,NPR2,PRKACA
Integration of energy metabolism	0.429	ADCY7,CACNA1C,CACNA2D2,CACNB3,GNG2,PRKACA,PRKCA
Interleukin-17 signaling	0.426	IL17RA
Histidine catabolism	0.426	CARNMT1
DNA Damage Reversal	0.426	MGMT
TRAIL signaling	0.426	CFLAR
Histidine Degradation III	0.426	MTHFD1L
Inositol Pyrophosphates Biosynthesis	0.426	PPIP5K2
Superoxide Radicals Degradation	0.426	CYGB
Purine Ribonucleosides Degradation to Ribose-1-phosphate	0.426	PNP
Pyrimidine Deoxyribonucleotides De Novo Biosynthesis I	0.42	AK1,AK4
IL-10 Signaling	0.418	BCL2,CCND1,CDKN2D,CREB5,IKBKB,JUN,MAFB,MAPK11,NFKB1,PRDM1
Deadenylation-dependent mRNA decay	0.416	DCP1A,EXOSC5,EXOSC7,PABPC1
Regulation of TP53 Expression and Degradation	0.414	CCNA1,PDPK1,PRDM1
tRNA Charging	0.414	EARS2,IARS1,MARS2
COPII-mediated vesicle transport	0.407	CD59,CNIH2,CTSC,NAPB,TRAPPC9
Growth Hormone Signaling	0.407	IGF2,PDPK1,PIK3C2B,PIK3R1,PRKCA
IL-17 Signaling	0.406	CEBPB,IL17RA,JUN,MAPK10,MAPK11,MRAS,NFKB1,PGF,PIK3C2B,PIK3R1,TGFB2,VEGFB
RHO GTPases Activate Formins	0.402	CLASP2,DAAM1,FMNL1,MRTFA,SRC,TUBA1A,TUBA1C,TUBB2A,TUBB2B
Glycogen metabolism	0.397	CALM1 (includes others),PHKA1
RAS processing	0.397	ARL2,CALM1 (includes others)
IL-22 Signaling	0.397	MAPK10,MAPK11
Tumoricidal Function of Hepatic Natural Killer Cells	0.397	CASP3,CASP9
Telomere Maintenance	0.394	CCNA1,DKC1,GAR1,H2BC9,WRN
Amyloid fiber formation	0.394	CALB1,H2BC9,ITM2B,PRKN,UBE2L6
Opioid Signalling	0.39	ADCY7,CALM1 (includes others),GNG2,PLCB4,PRKACA,PRKCA
Abacavir ADME	0.387	NT5C2
Interleukin-1 processing	0.387	NFKB1
Lysine catabolism	0.387	AASS
OAS antiviral response	0.387	ABCE1
Sphingosine and Sphingosine-1-phosphate Metabolism	0.387	SGPP2
Sucrose Degradation V (Mammalian)	0.387	ALDOC
RHOA Signaling	0.386	ARHGAP1,CDC42EP3,CDC42EP4,LIMK1,LPAR3,MYL6,PIP5K1C,SEPTIN5
Epithelial Adherens Junction Signaling	0.384	CTNNA2,LIMK1,MAGI2,MRAS,NANOS1,PAK3,SRC,TCF7L2,TGFB2,WWC1
G alpha (q) signalling events	0.384	CCKAR,CHRM1,GNG2,KALRN,LPAR3,LTB4R,MCHR1,PIK3R1,PLCB4,PROK2,RGS3
trans-Golgi Network Vesicle Budding	0.382	CLTB,CLVS1,OCRL,SORT1,TFRC
ISGylation Signaling Pathway	0.377	CCND1,IRF9,MAPK10,NFKB1,PRKN,RTN4,UBE2L6
Cholesterol biosynthesis	0.376	SREBF2,TM7SF2
Cell surface interactions at the vascular wall	0.37	ATP1B1,ATP1B2,ATP1B3,CD99L2,ITGB3,JAM3,L1CAM,PIK3R1,SDC2,SHC1,SLC16A1,SRC,TSPAN7
MAPK6/MAPK4 signaling	0.369	CDC42EP3,JUN,KALRN,MAPK4,PAK3,PRKACA
Signaling by ERBB4	0.361	NRG1,PIK3R1,SHC1,SRC
Circadian Clock	0.361	CRTC1,CRTC2,HELZ2,NCOA1
Hypoxia Signaling in the Cardiovascular System	0.359	CREB5,JUN,LDHA,UBE2H,UBE2L6
Regulation of TP53 Activity through Phosphorylation	0.358	CCNA1,MAPK11,RAD1,TAF4B,TP53INP1,WRN
Cachexia Signaling Pathway	0.357	ADCY7,BCL2,CAPN1,CAPN5,CASP3,CASP9,CEBPB,GUCY1A1,IKBKB,INSR,MAP1LC3B,MAPK10,MAPK11,NFKB1,NPY,PIK3C2B,PIK3R1,PRKACA,PRKCA,S1PR1,TGFB2,TNFRSF1A
POU5F1 (OCT4), SOX2, NANOG repress genes related to differentiation	0.353	DKK1
Ketone body metabolism	0.353	HMGCLL1
RUNX1 and FOXP3 control the development of regulatory T lymphocytes (Tregs)	0.353	RUNX1
RHOBTB3 ATPase cycle	0.353	RAB9B
Vasopressin regulates renal water homeostasis via Aquaporins	0.35	ADCY7,GNG2,PRKACA
Oncostatin M Signaling	0.35	MRAS,SHC1,TIMP3
Visual phototransduction	0.348	CALM1 (includes others),CNGB1,PPEF1,PRKCA
Hedgehog 'off' state	0.34	ADCY7,PRKACA,TUBA1A,TUBA1C,TUBB2A,TUBB2B,WDR35
Costimulation by the CD28 family	0.337	CD247,PAK3,PDPK1,PIK3R1,SRC
Toll-like Receptor Signaling	0.337	IKBKB,JUN,MAPK11,NFKB1,TOLLIP
BMAL1:CLOCK,NPAS2 activates circadian gene expression	0.337	HELZ2,NCOA1
Pyroptosis	0.337	CASP3,GSDME
Tryptophan Degradation X (Mammalian, via Tryptamine)	0.337	DDC,MAOA
Retinoid metabolism and transport	0.335	AKR1C1/AKR1C2,LRP1,SDC2
MIF Regulation of Innate Immunity	0.335	JUN,MAPK10,NFKB1
Transcriptional regulation by RUNX3	0.329	CCND1,JAG1,KAT2A,RUNX1,SRC,TCF7L2
Natural Killer Cell Signaling	0.328	CD247,LIMK1,MAP3K12,MAP3K13,MAPK11,MRAS,NFKB1,PAK3,PIK3C2B,PIK3R1,SOS2,ULBP2
DDX58/IFIH1-mediated induction of interferon-alpha/beta	0.327	CYLD,IKBKB,NFKB1,RNF125,UBE2L6
Signaling by Leptin	0.323	IRS2
Phenylalanine and tyrosine metabolism	0.323	FAH
Pexophagy	0.323	MAP1LC3B
Ketogenesis	0.323	HMGCLL1
Oleate Biosynthesis II (Animals)	0.323	FADS2
Pentose Phosphate Pathway	0.323	RPIA
Glycogen Degradation II	0.323	MTAP
Dolichyl-diphosphooligosaccharide Biosynthesis	0.323	ALG3
Glycine Betaine Degradation	0.323	SHMT2
Salvage Pathways of Pyrimidine Ribonucleotides	0.32	AK1,AK4,DMPK,LIMK1,PAK3,PIM1
Regulation of eIF4 and p70S6K Signaling	0.313	ITGB3,MAPK11,MRAS,PABPC1,PDPK1,PIK3C2B,PIK3R1,RPS2,RPS6,SHC1,SOS2
Protein folding	0.311	ARL2,GNG2,TUBA1A,TUBA1C,TUBB2A,TUBB2B
NRF2-mediated Oxidative Stress Response	0.304	ABCC4,AOX1,DNAJB2,DNAJB5,DNAJC12,DNAJC4,EPHX1,JUN,JUND,MRAS,PIK3C2B,PIK3R1,PRKCA,SCARB1
Energy dependent regulation of mTOR by LKB1-AMPK	0.303	RRAGB,TSC2
SIRT1 negatively regulates rRNA expression	0.303	H2BC9,TAF1D
Myogenesis	0.303	CTNNA2,MAPK11
EGR2 and SOX10-mediated initiation of Schwann cell myelination	0.303	MPZ,SREBF2
Superpathway of Cholesterol Biosynthesis	0.303	MVK,TM7SF2
Multiple Sclerosis Signaling Pathway	0.301	CAPN1,CAPN5,DUSP6,GRIN3A,GRINA,IL17RA,MAPK11,NFKB1,NLRP1,PARP6,PARP9,TGFB2,TNFRSF1A
IL-33 Signaling Pathway	0.3	CASP3,CASP9,CREB5,IKBKB,JUN,MAPK10,MAPK11,NFKB1,PIK3C2B,PIK3R1,PRKACA
Reversible hydration of carbon dioxide	0.296	CA12
Sensory perception of taste	0.296	SCN2A,SCN3A,SCN9A
Role of IL-17F in Allergic Inflammatory Airway Diseases	0.296	CREB5,IL17RA,NFKB1
Pyridoxal 5'-phosphate Salvage Pathway	0.291	DMPK,LIMK1,PAK3,PIM1
ESR-mediated signaling	0.291	BCL2,CCND1,H2BC9,JUN,JUND,NCOA1,RUNX1
Signaling by CSF3 (G-CSF)	0.287	GAB2,SHC1
Macrophage Alternative Activation Signaling Pathway	0.282	CEBPB,CREB5,IRS2,JUN,MAPK11,NFKB1,PIK3C2B,PIK3R1,SCARB1,TGFB2,TSC22D3
Mitochondrial iron-sulfur cluster biogenesis	0.273	SLC25A37
Trafficking and processing of endosomal TLR	0.273	CTSK
Metabolism of folate and pterines	0.273	SHMT2
Passive transport by Aquaporins	0.273	AQP11
Advanced glycosylation endproduct receptor signaling	0.273	LGALS3
Glycogen Degradation III	0.273	MTAP
Cholesterol Biosynthesis I	0.273	TM7SF2
NAD Phosphorylation and Dephosphorylation	0.273	ACP2
Cholesterol Biosynthesis II (via 24,25-dihydrolanosterol)	0.273	TM7SF2
Cholesterol Biosynthesis III (via Desmosterol)	0.273	TM7SF2
Methylglyoxal Degradation III	0.272	AKR1C1/AKR1C2,PRXL2B
Transcriptional activity of SMAD2/SMAD3:SMAD4 heterotrimer	0.272	E2F5,NEDD4L,TGIF1
BAG2 Signaling Pathway	0.27	CASP3,MAPT,NFKB1,PINK1,PRKN
Role of PI3K/AKT Signaling in the Pathogenesis of Influenza	0.262	CASP9,NFKB1,PIK3C2B,PIK3R1
Signaling by EGFR	0.261	PIK3R1,SHC1,SRC
Cell Cycle: G2/M DNA Damage Checkpoint Regulation	0.261	BORA,PKMYT1,RPRM
CGAS-STING Signaling Pathway	0.261	ATP6V0A1,ATP6V0D1,ATP6V0E2,ATP6V1G2,IKBKB,MAP1LC3B,NFKB1,TGFB2
G-protein beta:gamma signalling	0.259	GNG2,PDPK1
Thrombin signalling through proteinase activated receptors (PARs)	0.259	GNG2,SRC
Regulation of the Epithelial Mesenchymal Transition in Development Pathway	0.254	FZD8,JAG1,LOX,NFKB1,TCF7L2
Glutamate and glutamine metabolism	0.252	RIMKLA
DNA Double-Strand Break Repair by Non-Homologous End Joining	0.252	WRN
Role of IL-17A in Psoriasis	0.252	IL17RA
Leukotriene Biosynthesis	0.252	LTA4H
Mevalonate Pathway I	0.252	MVK
Phenylalanine Degradation IV (Mammalian, via Side Chain)	0.252	MAOA
Colanic Acid Building Blocks Biosynthesis	0.252	PMM1
Signal amplification	0.245	GNG2,SRC
Signaling by NOTCH2	0.233	JAG1,NEURL1B
Regulation of cholesterol biosynthesis by SREBP (SREBF)	0.233	SREBF2
Synthesis of Prostaglandins (PG) and Thromboxanes (TX)	0.233	PRXL2B
Assembly of RNA Polymerase III Complex	0.233	BRF1
GPVI-mediated activation cascade	0.221	PDPK1,PIK3R1
PRC2 methylates histones and DNA	0.221	H2BC9,PHF1
Transcriptional Regulation by NPAS4	0.221	IQSEC3,REST
Caspase activation via Death Receptors in the presence of ligand	0.215	CFLAR
Signal regulatory protein family interactions	0.215	SRC
SUMOylation of DNA methylation proteins	0.215	CBX4
FOXO-mediated transcription of cell death genes	0.215	PINK1
Superpathway of Citrulline Metabolism	0.215	ASL
Bile Acid Biosynthesis, Neutral Pathway	0.215	AKR1C1/AKR1C2
D-myo-inositol (1,4,5)-trisphosphate Degradation	0.215	OCRL
Transcriptional regulation of pluripotent stem cells	0.2	HIF3A
RAN Signaling	0.2	IPO5
Isoleucine Degradation I	0.2	BCAT1
1D-myo-inositol Hexakisphosphate Biosynthesis II (Mammalian)	0.2	OCRL
D-myo-inositol (1,3,4)-trisphosphate Biosynthesis	0.2	OCRL
CDX Gastrointestinal Cancer Signaling Pathway	0	CCND1,FZD8,IKBKB,JUN,MAPK11,NFKB1,PIK3C2B,PIK3R1,TCF7L2,TGFB2
Macrophage Classical Activation Signaling Pathway	0	IKBKB,IRF9,NFKB1,PARP9,TGFB2
MicroRNA Biogenesis Signaling Pathway	0	EXOSC5,EXOSC7,MAPK11,MRAS,PIK3C2B,PIK3R1,PNPT1,TGFB2,TSN,XPO5
Pathogen Induced Cytokine Storm Signaling Pathway	0	CASP3,COL4A1,COL5A1,COL6A2,COL6A6,GSDME,IRF9,JUN,LYST,MAPK10,MAPK11,MAPK4,NFKB1,PGF,PRDM1,RYR2,SLC2A3,TGFB2,TNFRSF1A,VEGFB
Glucocorticoid Receptor Signaling	0	BCL2,CD247,CDKN1C,IKBKB,IL17RA,JUN,MAPK10,MAPK11,MRAS,NCOA1,NFKB1,PIK3C2B,PIK3R1,PRKACA,RARA,RARB,SHC1,SOS2,SRC,TAF4B,TFB2M,TGFB2,TSC22D3
Neutrophil Extracellular Trap Signaling Pathway	0	CASP3,CASP9,COL4A1,COL5A1,COL6A2,COL6A6,MAPK10,MAPK11,NFKB1,ORAI2,PIK3C2B,PIK3R1,PLCB4,PLCE1,PLCH1,PLCL1,PPIF,PRDX6,PRKCA,SRC,TIMM17B,TIMM8A
Chaperone Mediated Autophagy Signaling Pathway	0	ATP6V0A1,ATP6V0D1,ATP6V0E2,ATP6V1G2,CCND1,CD247,EEF1A2,IKBKB,IL17RA,MAPK11,MAPT,MLLT11,MMP15,NFKB1,PDPK1,PIK3C2B,PIK3R1,RAB11B,RARA
NOD1/2 Signaling Pathway	0	IKBKB,JUN,MAPK10,MAPK11,NFKB1,RNF31,TGFB2
Microautophagy Signaling Pathway	0	COL4A1,COL5A1,COL6A2,COL6A6,MAP1LC3B,MIEF2,SIDT2
NFKBIE Signaling Pathway	0	CD247,IKBKB,NFKB1,TNFRSF1A
Aryl Hydrocarbon Receptor Signaling	0	CCNA1,CCND1,JUN,NFKB1,RARA,RARB,SRC,TGFB2
LPS/IL-1 Mediated Inhibition of RXR Function	0	ABCC4,CPT1C,CRAT,FMO5,HS3ST2,JUN,MAOA,MGMT,NCOA1,PPARGC1B,RARA,SCARB1,SULT4A1,TNFRSF1A
G alpha (i) signalling events	0	ADCY7,CHRM2,CNR1,GABBR1,GAL,GNAZ,GNG2,LPAR3,MCHR1,NPY,RGS12,RGS3,RGS8,SRC
Effects of PIP2 hydrolysis	0	DGKI
ISG15 antiviral mechanism	0	UBE2L6
Meiotic synapsis	0	H2BC9,LMNA
Cellular response to hypoxia	0	AJUBA,EGLN3,HIF3A
Formation of Fibrin Clot (Clotting Cascade)	0	C1QBP,SERPING1
The citric acid (TCA) cycle and respiratory electron transport	0	HAGH,LDHA,SLC16A1
Phase II - Conjugation of compounds	0	MTRR,SULT4A1
Eukaryotic Translation Elongation	0	EEF1A2,RPL35,RPS2,RPS6
Sulfur amino acid metabolism	0	MTRR
Electron transport, ATP synthesis, and heat production by uncoupling proteins	0	ETFB
MyD88:MAL(TIRAP) cascade initiated on plasma membrane	0	IKBKB
Toll-like Receptor Cascades	0	DNM3
MyD88-independent TLR4 cascade	0	IKBKB
Complement cascade	0	CD59,CLU,SERPING1
Toll Like Receptor 3 (TLR3) Cascade	0	IKBKB
Plasma lipoprotein assembly, remodeling, and clearance	0	AP2A1,AP2A2,PRKACA,SCARB1
SRP-dependent cotranslational protein targeting to membrane	0	RPL35,RPS2,RPS6
Cytosolic sensors of pathogen-associated DNA	0	IKBKB,NFKB1
Regulation of beta-cell development	0	HNF4G,KAT2A
Metabolism of non-coding RNA	0	GEMIN5,WDR77
Degradation of beta-catenin by the destruction complex	0	FRAT2,TCF7L2,TLE5
Metabolism of steroid hormones	0	STAR
Nicotinate metabolism	0	NMRK1
Immunoregulatory interactions between a Lymphoid and a non-Lymphoid cell	0	CD200,CD247,CLEC2D
Signaling by BMP	0	CHRDL1
TCR signaling	0	CD247,IKBKB,NFKB1,PAK3,PDPK1,PIK3R1
Fcgamma receptor (FCGR) dependent phagocytosis	0	CD247,LIMK1,MYO5A,PIK3R1,SRC
Generic Transcription Pathway	0	HDAC11,HNF4G,KAT2A,RARA,RARB,RORB,ZFP2,ZNF425,ZNF436,ZNF485,ZNF517,ZNF555,ZNF778,ZNF792
RNA Polymerase II Transcription	0	AFF4,TAF4B,U2AF1L4
Asparagine N-linked glycosylation	0	NAGK
Metabolism of amine-derived hormones	0	DDC
Gene Silencing by RNA	0	H2BC9,TSN,XPO5
Phase I - Functionalization of compounds	0	ACSS1,ACSS2,MAOA,NCOA1
Arachidonic acid metabolism	0	EPHX2,LTA4H
DAP12 interactions	0	PIK3R1,SHC1
Binding and Uptake of Ligands by Scavenger Receptors	0	COL4A1,LRP1,SCARB1
Selenoamino acid metabolism	0	RPL35,RPS2,RPS6,SCLY
Fc epsilon receptor (FCERI) signaling	0	CALM1 (includes others),GAB2,IKBKB,JUN,MAPK10,NFKB1,PDPK1,PIK3R1,SHC1
Mitotic Metaphase and Anaphase	0	CLASP2,LMNA,SIRT2,TUBA1A,TUBA1C,TUBB2A,TUBB2B
Oncogene Induced Senescence	0	CDKN2D
DNA Damage/Telomere Stress Induced Senescence	0	CCNA1,H1-0,H2BC9
SUMOylation of DNA damage response and repair proteins	0	CBX4,WRN
SUMOylation of transcription factors	0	MITF
Cellular response to heat stress	0	DNAJC2
Metabolism of polyamines	0	ODC1,SRM
Class A/1 (Rhodopsin-like receptors)	0	CCKAR,CHRM1,CHRM2,CNR1,ECE1,GAL,LPAR3,LTB4R,MCHR1,NPY,PLPPR2,PROK2,S1PR1
Class B/2 (Secretin family receptors)	0	FZD8,GNG2,RAMP1
Olfactory Signaling Pathway	0	CNGB1
ABC-family proteins mediated transport	0	ABCB6,ABCC4,ERLIN1
Peroxisomal lipid metabolism	0	CRAT
Regulation of lipid metabolism by PPARalpha	0	FAM120B,HELZ2,NCOA1,PPARGC1B,SREBF2
Incretin synthesis, secretion, and inactivation	0	TCF7L2
SUMOylation of intracellular receptors	0	RARA
G alpha (s) signalling events	0	ADCY7,GNAZ,GNG2,PDE2A,RAMP1,SRC
Class C/3 (Metabotropic glutamate/pheromone receptors)	0	GABBR1
Synthesis, secretion, and deacylation of Ghrelin	0	BCHE
ERCC6 (CSB) and EHMT2 (G9a) positively regulate rRNA expression	0	H2BC9
NoRC negatively regulates rRNA expression	0	H2BC9
TAK1-dependent IKK and NF-kappa-B activation	0	IKBKB,NFKB1
MyD88 cascade initiated on plasma membrane	0	IKBKB
Interleukin-1 family signaling	0	IKBKB,NFKB1,PTPN13,TOLLIP
Other interleukin signaling	0	CASP3
Mitotic G2-G2/M phases	0	AJUBA,BORA,CCNA1,DCTN1,PKMYT1,PRKACA,TUBA1A,TUBA1C,TUBB2A,TUBB2B
Regulation of mitotic cell cycle	0	CCNA1
Mitotic G1 phase and G1/S transition	0	CABLES1,CCNA1,CCND1,CDKN1C,CDKN2D,E2F5,SRC
SUMOylation of chromatin organization proteins	0	CBX4
SUMOylation of RNA binding proteins	0	CBX4
Miscellaneous transport and binding events	0	NIPAL3
DNA methylation	0	H2BC9
Signaling by Retinoic Acid	0	RARA,RARB
Mitochondrial translation	0	MRRF
C-type lectin receptors (CLRs)	0	CALM1 (includes others),IKBKB,NFKB1,PAK3,PDPK1,PRKACA,SRC
Activated PKN1 stimulates transcription of AR regulated genes KLK2 and KLK3	0	H2BC9
RHO GTPases activate CIT	0	MYL6
TP53 Regulates Metabolic Genes	0	PRDX5,RRAGB,TSC2
Signaling by FGFR2	0	FGFR2,PIK3R1,SHC1,SRC
TNFs bind their physiological receptors	0	TNFRSF1A
Regulation of TLR by endogenous ligand	0	GSDME
Deubiquitination	0	CCNA1,CYLD,FKBP8,H2BC9,KAT2A,PRKN,USP20
HDR through Homologous Recombination (HRR) or Single Strand Annealing (SSA)	0	CCNA1,H2BC9,RAD1,WRN
Nonhomologous End-Joining (NHEJ)	0	H2BC9
DNA Double Strand Break Response	0	APBB1,H2BC9
Nucleotide Excision Repair	0	CUL4A
Interleukin-10 signaling	0	TNFRSF1A
rRNA processing	0	PRORP
TP53 Regulates Transcription of DNA Repair Genes	0	JUN
Keratinization	0	CAPN1,JUP,KAZN
PTEN Regulation	0	CBX4,CBX6,JUN,REST,RRAGB
RNA polymerase II transcribes snRNA genes	0	SNAPC1
Mitotic Prophase	0	H2BC9,LMNA,NEK6,PRKCA
Mitotic Prometaphase	0	CLASP2,DCTN1,NEK6,PRKACA,TUBA1A,TUBA1C,TUBB2A,TUBB2B
Activation of the pre-replicative complex	0	DBF4
DNA Replication Pre-Initiation	0	H2BC9
Synthesis of DNA	0	CCNA1
S Phase	0	CABLES1,CCNA1,CCND1,E2F5
Cell Cycle Checkpoints	0	CCNA1,CLASP2,DBF4,H2BC9,PCBP4,PKMYT1,RAD1,WRN
Glucose metabolism	0	ALDOC,PFKFB4,PRKACA
Branched-chain amino acid catabolism	0	BCAT1
Processing of Capped Intron-Containing Pre-mRNA	0	SNRNP48,U2AF1L4
Eukaryotic Translation Initiation	0	PABPC1,RPL35,RPS2,RPS6
Eukaryotic Translation Termination	0	RPL35,RPS2,RPS6
DNA Damage Bypass	0	CUL4A,UBE2L6
Resolution of Abasic Sites (AP sites)	0	UNG
Nucleosome assembly	0	H2BC9,NPM1
Interferon gamma signaling	0	IRF9,NCAM1,TRIM2,TRIM46
Gastrin-CREB signalling pathway via PKC and MAPK	0	PRKCA
Signaling by PTK6	0	CCND1,ERBB2,NRG1
Protein ubiquitination	0	UBE2H
E3 ubiquitin ligases ubiquitinate target proteins	0	H2BC9,RNF152
Transcriptional regulation by RUNX1	0	CBX4,CBX6,CTSK,H2BC9,LGALS3,RUNX1
GABA synthesis, release, reuptake and degradation	0	ABAT
RUNX1 regulates megakaryocyte differentiation and platelet function	0	H2BC9,RUNX1
Regulation of RUNX2 expression and activity	0	HIVEP3,PPARGC1B
Gene and protein expression by JAK-STAT signaling after IL-12 stimulation	0	MTAP
Neddylation	0	CUL4A,DCAF4,FBXL16,HIF3A,KCTD7,KLHL13,SPSB1,SPSB4
Nucleotide catabolism	0	NT5C2
Nucleotide salvage	0	APRT
Triglyceride metabolism	0	PRKACA
Transcriptional Regulation by MECP2	0	CALM1 (includes others),PRKACA,SLC2A3
Signaling by NOTCH4	0	JAG1,KAT2A
NR1H2 and NR1H3-mediated signaling	0	NCOA1
Peroxisomal protein import	0	CRAT,EPHX2,TYSND1
Interferon alpha/beta signaling	0	ABCE1,IRF9
Meiotic recombination	0	H2BC9,TEX15
Endosomal Sorting Complex Required For Transport (ESCRT)	0	MVB12B
Nonsense-Mediated Decay (NMD)	0	DCP1A,PABPC1,RPL35,RPS2,RPS6
FLT3 Signaling	0	GAB2,PIK3R1
FOXO-mediated transcription	0	TXNIP
FOXO-mediated transcription of oxidative stress, metabolic and neuronal genes	0	NPY
Late endosomal microautophagy	0	MVB12B
Response of EIF2AK4 (GCN2) to amino acid deficiency	0	CEBPB,RPL35,RPS2,RPS6
Cytoprotection by HMOX1	0	HELZ2,NCOA1,TXNIP
MyD88 dependent cascade initiated on endosome	0	IKBKB
Expression and translocation of olfactory receptors	0	OR7D2,REEP1
KEAP1-NFE2L2 pathway	0	MAP1LC3B
Formation of paraxial mesoderm	0	KAT2A
Growth hormone receptor signaling	0	IRS2
Class I MHC mediated antigen processing and presentation	0	FBXL16,HERC3,IKBKB,KCTD7,KLHL13,NEDD4L,PRKN,RNF182,RNF19A,SPSB1,SPSB4,TRIM36,TRIM69,UBE2H,UBE2L6,UFL1
Factors involved in megakaryocyte development and platelet production	0	CABLES1,CABLES2,MICAL1,PRKACA
Signaling by the B Cell Receptor (BCR)	0	CALM1 (includes others),IKBKB,NFKB1,ORAI2,PIK3R1
Formation of definitive endoderm	0	TCF7L2
Formation of WDR5-containing histone-modifying complexes	0	BOD1,KAT2A
LXR/RXR Activation	0	CLU,NFKB1,SERPINF1,TNFRSF1A
NAFLD Signaling Pathway	0	CASP3,CPT1C,IKBKB,INSR,IRS2,JUN,MAPK10,NFKB1,PIK3C2B,PIK3R1,TGFB2,TNFRSF1A
FXR/RXR Activation	0	FGF19,MAPK10,NFKB1,RARA,SCARB1,SRC,TGFB2,TXNIP
PXR/RXR Activation	0	INSR,NCOA1,PRKACA
Role of BRCA1 in DNA Damage Response	0	E2F5,E2F7
IL-12 Signaling and Production in Macrophages	0	CALM1 (includes others),CEBPB,CLU,IKBKB,JUN,MAPK11,NCOA1,NFKB1,PIK3C2B,PIK3R1,PRKCA,TGFB2
Role of RIG1-like Receptors in Antiviral Innate Immunity	0	IKBKB,NFKB1
Role of Pattern Recognition Receptors in Recognition of Bacteria and Viruses	0	MAPK10,NFKB1,PIK3C2B,PIK3R1,PRKCA,TGFB2
TREM1 Signaling	0	NFKB1
Role of NFAT in Regulation of the Immune Response	0	CALM1 (includes others),CD247,GNAO1,GNAZ,GNG2,IKBKB,IPO5,JUN,MRAS,NFKB1,PIK3C2B,PIK3R1,PLCB4,SOS2
FcŒ≥RIIB Signaling in B Lymphocytes	0	CACNA1C,CACNA2D2,CACNB1,CACNB3,CACNG2,CACNG4,CACNG7,MAPK10,MRAS,PDPK1,PIK3C2B,PIK3R1,SHC1
CCR5 Signaling in Macrophages	0	CACNA1C,CACNA2D2,CACNB1,CACNB3,CACNG2,CACNG4,CACNG7,CALM1 (includes others),CD247,GNAO1,GNAZ,GNG2,JUN,MAPK10,MAPK11,MRAS,PRKCA
Calcium-induced T Lymphocyte Apoptosis	0	ATP2A3,CALM1 (includes others),CD247,PRKCA
Cytotoxic T Lymphocyte-mediated Apoptosis of Target Cells	0	BCL2,CASP3,CASP9,CD247
Airway Pathology in Chronic Obstructive Pulmonary Disease	0	FGF14,FGF19,TGFB2
CTLA4 Signaling in Cytotoxic T Lymphocytes	0	AP2A1,AP2A2,CD247,CLTB,JUN,MAPK10,MAPK11,MRAS,NFKB1,PIK3C2B,PIK3R1,PLD3,PLD6,SRC,TGFB2
Airway Inflammation in Asthma	0	TGFB2
T Helper Cell Differentiation	0	CD247,TNFRSF1A
CD28 Signaling in T Helper Cells	0	CALM1 (includes others),CD247,IKBKB,JUN,MAPK10,NFKB1,PDPK1,PIK3C2B,PIK3R1
IL-15 Signaling	0	MAPK11,MRAS,NFKB1,PIK3C2B,PIK3R1,SHC1
Dendritic Cell Maturation	0	CD247,CREB5,FSCN1,IKBKB,MAPK10,MAPK11,NFKB1,PIK3C2B,PIK3R1,PLCB4,PLCE1,PLCH1,PLCL1,TNFRSF1A
Mechanisms of Viral Exit from Host Cells	0	PRKCA,SH3GLB2
CNTF Signaling	0	MRAS,PIK3C2B,PIK3R1
ICOS-ICOSL Signaling in T Helper Cells	0	CALM1 (includes others),CD247,GAB2,IKBKB,NFKB1,PDPK1,PIK3C2B,PIK3R1,SHC1
Lipid Antigen Presentation by CD1	0	AP2A1,AP2A2,ARF6,CD247
Mitotic Roles of Polo-Like Kinase	0	CAPN1,PKMYT1
Role of CHK Proteins in Cell Cycle Checkpoint Control	0	E2F5,E2F7,RAD1
DNA Methylation and Transcriptional Repression Signaling	0	CEBPB,E2F5,E2F7,TCF19,TFE3
ATM Signaling	0	CREB5,JUN,MAPK10,MAPK11
Role of NANOG in Mammalian Embryonic Stem Cell Pluripotency	0	APC2,FZD8,MRAS,PIK3C2B,PIK3R1,SHC1,SOS2
Type I Diabetes Mellitus Signaling	0	BCL2,CASP3,CASP9,CD247,HSPD1,ICA1,IKBKB,MAPK10,MAPK11,NFKB1,PTPRN,TNFRSF1A
Basal Cell Carcinoma Signaling	0	APC2,FZD8,TCF7L2
Primary Immunodeficiency Signaling	0	UNG
Allograft Rejection Signaling	0	CD247
Autoimmune Thyroid Disease Signaling	0	CD247
Graft-versus-Host Disease Signaling	0	CD247
p70S6K Signaling	0	EEF2K,MAPT,MRAS,PDPK1,PIK3C2B,PIK3R1,PLCB4,PLCE1,PLCH1,PLCL1,PRKCA,RPS6,SHC1,SOS2,SRC
ERK5 Signaling	0	CREB5,MRAS,NTRK1,SRC
G Protein Signaling Mediated by Tubby	0	CD247,GNAO1,GNAZ,GNG2,INSR,MCHR1,MRAS,PLCB4,TUB,WDR35
Communication between Innate and Adaptive Immune Cells	0	CD247
Crosstalk between Dendritic Cells and Natural Killer Cells	0	FSCN1,NFKB1
Systemic Lupus Erythematosus Signaling	0	CD247,JUN,MRAS,PIK3C2B,PIK3R1,SNRNP48,SOS2
CDC42 Signaling	0	APC2,CD247,IQGAP2,ITGB3,JUN,LIMK1,MAPK10,MAPK11,MYL6,PAK3,SRC,TNK2
FAK Signaling	0	ADGRA2,ADGRL1,CAPN1,CAPN5,CCKAR,CCND1,CD247,CHRM1,CHRM2,CNR1,EFNA2,EFNB3,ELK3,ERBB2,FZD8,GABBR1,GPR137C,GPR153,GPR162,GPR173,GPR26,GPRC5B,IL17RA,ITGB3,JUN,LGR5,LPAR3,LTB4R,MAPK10,MAPK11,MAPK4,MCHR1,MRAS,NFKB1,PAK3,PDPK1,PIK3C2B,PIK3R1,S1PR1,SHB,SOS2,SRC,TCF7L2,TGFB2
Hereditary Breast Cancer Signaling	0	CCND1,HDAC11,MRAS,NPM1,PIK3C2B,PIK3R1
Phospholipase C Signaling	0	ADCY7,ARHGEF10,ARHGEF3,CALM1 (includes others),CD247,CREB5,DIRAS3,GNG2,GUCY1A1,HDAC11,ITGB3,MRAS,MYL6,NFKB1,PLCB4,PLCE1,PLD3,PLD6,PRKCA,RHOBTB2,RHOQ,RHOU,SHC1,SOS2,SRC
Altered T Cell and B Cell Signaling in Rheumatoid Arthritis	0	CD247,NFKB1
Atherosclerosis Signaling	0	CLU,NFKB1,PRDX6
Neuroprotective Role of THOP1 in Alzheimer's Disease	0	ECE1,MAPT,PRKACA,PRSS12
Regulation of IL-2 Expression in Activated and Anergic T Lymphocytes	0	CALM1 (includes others),CD247,IKBKB,JUN,MAPK10,MRAS,NFKB1,SOS2,TGFB2
Granzyme A Signaling	0	H1-0
Role of WNT/GSK-3Œ≤ Signaling in the Pathogenesis of Influenza	0	APC2,FZD8,NCOA1,TCF7L2
NUR77 Signaling in T Lymphocytes	0	BCL2,CALM1 (includes others),CASP3,CASP9,CD247,PRKCA
PKCŒ∏ Signaling in T Lymphocytes	0	CACNA1C,CACNA2D2,CACNB1,CACNB3,CACNG2,CACNG4,CACNG7,CD247,IKBKB,JUN,MAP3K12,MAP3K13,MRAS,NFKB1,PIK3C2B,PIK3R1,SOS2
Role of Hypercytokinemia/hyperchemokinemia in the Pathogenesis of Influenza	0	IRF9,NFKB1,S1PR1
Antiproliferative Role of TOB in T Cell Signaling	0	CCNA1,CD247,PABPC1,TGFB2
MSP-RON Signaling Pathway	0	PIK3C2B,PIK3R1
OX40 Signaling Pathway	0	BCL2,CD247,JUN,MAPK10,NFKB1
PI3K Signaling in B Lymphocytes	0	CALM1 (includes others),IKBKB,IRS2,JUN,MRAS,NFKB1,PDPK1,PIK3R1,PLCB4,PLCE1,PLCH1,PLCL1
MIF-mediated Glucocorticoid Regulation	0	NFKB1
Cell Cycle Control of Chromosomal Replication	0	DBF4
Assembly of RNA Polymerase II Complex	0	TAF4B
Spliceosomal Cycle	0	U2AF1L4
Role of JAK1, JAK2 and TYK2 in Interferon Signaling	0	NFKB1
Hematopoiesis from Pluripotent Stem Cells	0	CD247
Heparan Sulfate Biosynthesis	0	HS3ST2,PRDX6,SULT4A1
Retinoate Biosynthesis I	0	AKR1C1/AKR1C2
Nicotine Degradation III	0	AOX1,FMO5
Dopamine Degradation	0	MAOA
Heparan Sulfate Biosynthesis (Late Stages)	0	HS3ST2,PRDX6,SULT4A1
Glutathione Redox Reactions I	0	PRDX6
Ubiquinol-10 Biosynthesis (Eukaryotic)	0	MICAL1
Œ≥-linolenate Biosynthesis II (Animals)	0	FADS2
Triacylglycerol Degradation	0	PRDX6
Chondroitin Sulfate Biosynthesis	0	HS3ST2,SULT4A1
Dermatan Sulfate Biosynthesis	0	HS3ST2,SULT4A1
Dermatan Sulfate Biosynthesis (Late Stages)	0	HS3ST2,SULT4A1
Nicotine Degradation II	0	AOX1,FMO5
Superpathway of D-myo-inositol (1,4,5)-trisphosphate Metabolism	0	OCRL
Mitochondrial L-carnitine Shuttle Pathway	0	CPT1C
Serotonin Degradation	0	DHRS2,MAOA
Chondroitin Sulfate Biosynthesis (Late Stages)	0	HS3ST2,SULT4A1
Superpathway of Melatonin Degradation	0	MAOA
Histidine Degradation VI	0	MICAL1
Stearate Biosynthesis I (Animals)	0	DUS3L,PRXL2B,SIRT2
Noradrenaline and Adrenaline Degradation	0	DHRS2,MAOA
Pregnenolone Biosynthesis	0	MICAL1
Acetone Degradation I (to Methylglyoxal)	0	PRXL2B
Putrescine Degradation III	0	MAOA
Oxidative Ethanol Degradation III	0	ACSS1,ACSS2
Superpathway of Geranylgeranyldiphosphate Biosynthesis I (via Mevalonate)	0	MVK
Agranulocyte Adhesion and Diapedesis	0	CLDN10,CLDN15,JAM3,MMP15,MYL6,TNFRSF1A
Granulocyte Adhesion and Diapedesis	0	CLDN10,CLDN15,JAM3,MMP15,SDC2,TNFRSF1A
TEC Kinase Signaling	0	CD247,DIRAS3,GNAO1,GNAZ,GNG2,ITGB3,MAPK10,MRAS,NFKB1,PAK3,PIK3C2B,PIK3R1,PRKCA,RHOBTB2,RHOQ,RHOU,SRC
BER (Base Excision Repair) Pathway	0	UNG
HIPPO signaling	0	AJUBA,DLG2,WWC1
SAPK/JNK Signaling	0	CD247,DUSP10,DUSP8,GNG2,JUN,MAP3K12,MAP3K13,MAPK10,MAPK8IP1,MRAS,PIK3C2B,PIK3R1,SHC1,SOS2
Interferon Signaling	0	BCL2,IRF9
Protein Ubiquitination Pathway	0	DNAJB2,DNAJB5,DNAJC12,DNAJC2,DNAJC4,HSPD1,HSPE1,NEDD4L,PRKN,UBE2H,UBE2L6,USP20,USP35
Xenobiotic Metabolism Signaling	0	FMO5,GRIP1,HS3ST2,MAOA,MAP3K12,MAP3K13,MAPK11,MGMT,MRAS,NCOA1,NFKB1,PIK3C2B,PIK3R1,PRKCA,SULT4A1
IL-4 Signaling	0	CD247,COL4A1,COL5A1,COL6A2,COL6A6,CREB5,IRS2,MAOA,MAPK11,MRAS,NFKB1,PIK3C2B,PIK3R1,SOS2,TGFB2,TIMP3
B Cell Receptor Signaling	0	CALM1 (includes others),CREB5,GAB2,IKBKB,JUN,MAP3K12,MAP3K13,MAPK11,MRAS,NFKB1,OCRL,PDPK1,PIK3C2B,PIK3R1,SHC1,SOS2
Sonic Hedgehog Signaling	0	PRKACA
NF-Œ∫B Signaling	0	CD247,FGFR2,FGFR3,IKBKB,INSR,MRAS,NFKB1,NTRK1,NTRK3,PIK3C2B,PIK3R1,PRKACA,TNFRSF1A
T Cell Receptor Signaling	0	CALM1 (includes others),CD247,DUSP6,IKBKB,JUN,MAPK11,MRAS,NFKB1,PIK3C2B,PIK3R1,SOS2,TCF7L2
Phagosome Formation	0	ADGRA2,ADGRL1,ARF6,CCKAR,CHRM1,CHRM2,CNR1,FZD8,GAB2,GABBR1,GPR137C,GPR153,GPR162,GPR173,GPR26,GPRC5B,ITGB3,LGR5,LIMK1,LPAR3,LTB4R,MAPK4,MCHR1,MRAS,MYL6,OCRL,PAK3,PIK3C2B,PIK3R1,PIP5K1C,PLD3,PLD6,PRDX6,PRKCA,S1PR1,SOS2,SRC
PD-1, PD-L1 cancer immunotherapy pathway	0	CD247,PIK3C2B,PIK3R1,TGFB2,TNFRSF1A
Cancer Drug Resistance by Drug Efflux	0	MRAS,NFKB1,PIK3R1
Th1 and Th2 Activation Pathway	0	CD247,JAG1,JUN,NFKB1,PIK3C2B,PIK3R1,S1PR1
Th1 Pathway	0	CD247,NFKB1,PIK3C2B,PIK3R1
Th2 Pathway	0	CD247,JAG1,JUN,NFKB1,PIK3C2B,PIK3R1,S1PR1
Th17 Activation Pathway	0	CD247,NFKB1,RUNX1
NER (Nucleotide Excision Repair, Enhanced Pathway)	0	CUL4A
SPINK1 General Cancer Pathway	0	MRAS,PIK3C2B,PIK3R1
Apelin Liver Signaling Pathway	0	MAPK10
Apelin Cardiac Fibroblast Signaling Pathway	0	TGFB2
FAT10 Signaling Pathway	0	MAP1LC3B
T Cell Exhaustion Signaling Pathway	0	CD247,IRF9,JUN,MAPK10,MRAS,PIK3C2B,PIK3R1,PRDM1
Systemic Lupus Erythematosus in T Cell Signaling Pathway	0	CASP3,CASP9,CD247,CREB5,DIRAS3,JUN,MRAS,PIK3C2B,PIK3R1,RHOBTB2,RHOQ,RHOU,SOS2
Systemic Lupus Erythematosus in B Cell Signaling Pathway	0	BCL2,CALM1 (includes others),CCND1,IRF9,JUN,MRAS,NFKB1,OCRL,PDPK1,PIK3C2B,PIK3R1,PRKCA,SHC1,SHF,SOS2,SRC,TGFB2
Inhibition of ARE-Mediated mRNA Degradation Pathway	0	DCP1A,EXOSC5,EXOSC7,MAPK11,MAPK4,PRKACA,TNFRSF1A,ZFP36L1
HOTAIR Regulatory Pathway	0	ERBB2,MMP15,MRTFA,NFKB1,PIK3C2B,PIK3R1,REST,TCF7L2
Xenobiotic Metabolism General Signaling Pathway	0	MAP3K12,MAP3K13,MAPK11,MRAS,PIK3C2B,PIK3R1,PRKCA
Xenobiotic Metabolism AHR Signaling Pathway	0	NCOA1,NFKB1
Xenobiotic Metabolism CAR Signaling Pathway	0	FMO5,GRIP1,HS3ST2,NCOA1,PRKCA,SRC,SULT4A1
Xenobiotic Metabolism PXR Signaling Pathway	0	GRIP1,HS3ST2,MAOA,NCOA1,PRKACA,PRKCA,SULT4A1
Kinetochore Metaphase Signaling Pathway	0	BOD1
Eicosanoid Signaling	0	LTA4H,LTB4R,PRDX6

## Sheet: IPA_Unique-in-siWDR5
¬© 2000-2023 QIAGEN. All rights reserved.
Ingenuity Canonical Pathways	-log(p-value)	Molecules
Eukaryotic Translation Elongation	21.7	EEF1D,RPL11,RPL13,RPL15,RPL18A,RPL23,RPL27,RPL29,RPL31,RPL34,RPL36A,RPL37,RPL37A,RPL41,RPL6,RPL8,RPL9,RPLP1,RPS10,RPS14,RPS15A,RPS24,RPS28,RPS4X,RPS5,RPS7
Selenoamino acid metabolism	21.5	HNMT,PAPSS2,RPL11,RPL13,RPL15,RPL18A,RPL23,RPL27,RPL29,RPL31,RPL34,RPL36A,RPL37,RPL37A,RPL41,RPL6,RPL8,RPL9,RPLP1,RPS10,RPS14,RPS15A,RPS24,RPS28,RPS4X,RPS5,RPS7
Response of EIF2AK4 (GCN2) to amino acid deficiency	20.7	RPL11,RPL13,RPL15,RPL18A,RPL23,RPL27,RPL29,RPL31,RPL34,RPL36A,RPL37,RPL37A,RPL41,RPL6,RPL8,RPL9,RPLP1,RPS10,RPS14,RPS15A,RPS24,RPS28,RPS4X,RPS5,RPS7,TRIB3
Eukaryotic Translation Termination	20.5	RPL11,RPL13,RPL15,RPL18A,RPL23,RPL27,RPL29,RPL31,RPL34,RPL36A,RPL37,RPL37A,RPL41,RPL6,RPL8,RPL9,RPLP1,RPS10,RPS14,RPS15A,RPS24,RPS28,RPS4X,RPS5,RPS7
Nonsense-Mediated Decay (NMD)	20.3	EIF4G1,PPP2R2A,RPL11,RPL13,RPL15,RPL18A,RPL23,RPL27,RPL29,RPL31,RPL34,RPL36A,RPL37,RPL37A,RPL41,RPL6,RPL8,RPL9,RPLP1,RPS10,RPS14,RPS15A,RPS24,RPS28,RPS4X,RPS5,RPS7
Eukaryotic Translation Initiation	18.7	EIF4G1,RPL11,RPL13,RPL15,RPL18A,RPL23,RPL27,RPL29,RPL31,RPL34,RPL36A,RPL37,RPL37A,RPL41,RPL6,RPL8,RPL9,RPLP1,RPS10,RPS14,RPS15A,RPS24,RPS28,RPS4X,RPS5,RPS7
SRP-dependent cotranslational protein targeting to membrane	18.2	RPL11,RPL13,RPL15,RPL18A,RPL23,RPL27,RPL29,RPL31,RPL34,RPL36A,RPL37,RPL37A,RPL41,RPL6,RPL8,RPL9,RPLP1,RPS10,RPS14,RPS15A,RPS24,RPS28,RPS4X,RPS5,RPS7
Major pathway of rRNA processing in the nucleolus and cytosol	16.8	BOP1,CSNK1E,LOC102724159/PWP2,RPL11,RPL13,RPL15,RPL18A,RPL23,RPL27,RPL29,RPL31,RPL34,RPL36A,RPL37,RPL37A,RPL41,RPL6,RPL8,RPL9,RPLP1,RPS10,RPS14,RPS15A,RPS24,RPS28,RPS4X,RPS5,RPS7,TBL3
EIF2 Signaling	14.3	EIF4G1,EIF4G3,RPL11,RPL13,RPL15,RPL18A,RPL23,RPL27,RPL29,RPL31,RPL34,RPL36A,RPL37,RPL37A,RPL41,RPL6,RPL7L1,RPL8,RPL9,RPLP1,RPS10,RPS14,RPS15A,RPS24,RPS28,RPS4X,RPS5,RPS7,TRIB3
Signaling by Retinoic Acid	5.59	CPT1A,CPT1B,CRABP1,CRABP2,CYP26B1,RARG,RDH10,RDH11
mTOR Signaling	4.46	EIF4G1,EIF4G3,FNBP1,PPP2R2A,PPP2R2C,PRKCD,PRKCH,RPS10,RPS14,RPS15A,RPS24,RPS28,RPS4X,RPS5,RPS7
HIPPO signaling	4.2	CSNK1E,LATS2,PATJ,PPP1R14A,PPP1R3D,PPP2R2A,PPP2R2C,SMAD1,STK3
Effects of PIP2 hydrolysis	3.72	DGKA,ITPR3,MGLL,PRKCD,PRKCH
Coronavirus Pathogenesis Pathway	3.53	ACE,CCNE1,E2F8,RIPK1,RN7SL1,RPS10,RPS14,RPS15A,RPS24,RPS28,RPS4X,RPS5,RPS7
Regulation of eIF4 and p70S6K Signaling	3.38	EIF4G1,EIF4G3,PPP2R2A,PPP2R2C,RPS10,RPS14,RPS15A,RPS24,RPS28,RPS4X,RPS5,RPS7
3-phosphoinositide Degradation	3.23	ACP6,ENPP1,INPPL1,MTM1,MTMR7,PPP1R14A,PPP1R3D,PPP2R2A,PPP2R2C,PPP3CB,SGPP1,SYNJ2
D-myo-inositol (1,4,5,6)-Tetrakisphosphate Biosynthesis	2.91	ACP6,ENPP1,INPPL1,MTMR7,PPP1R14A,PPP1R3D,PPP2R2A,PPP2R2C,PPP3CB,SGPP1,SYNJ2
D-myo-inositol (3,4,5,6)-tetrakisphosphate Biosynthesis	2.91	ACP6,ENPP1,INPPL1,MTMR7,PPP1R14A,PPP1R3D,PPP2R2A,PPP2R2C,PPP3CB,SGPP1,SYNJ2
CLEAR Signaling Pathway	2.66	EGFR,GLB1,ITPR3,LAMTOR3,MID1,PPARA,PPP2R2A,PPP2R2C,PPP3CB,PRKCD,PRKCH,SUMF1,TGFBR3,TNFRSF11A
D-myo-inositol-5-phosphate Metabolism	2.62	ACP6,ENPP1,INPPL1,MTMR7,PPP1R14A,PPP1R3D,PPP2R2A,PPP2R2C,PPP3CB,SGPP1,SYNJ2
Pulmonary Healing Signaling Pathway	2.58	CXCL12,EGFR,LYN,MMP2,NOTCH3,PRKCD,PRKCH,SMAD1,TCF7,WNT3,WNT5A
Regulation of lipid metabolism by PPARalpha	2.52	ARNT2,BMAL1,CPT1A,GRHL1,NR1D1,PEX11A,PPARA,TRIB3
WNT/Œ≤-catenin Signaling	2.52	CSNK1E,GJA1,PPP2R2A,PPP2R2C,RARG,SOX9,TCF7,TGFBR3,WNT3,WNT5A
Neutrophil Extracellular Trap Signaling Pathway	2.43	ABHD3,CASP6,CASP7,COL25A1,ITPR3,LYN,MMP2,NDUFA11,NDUFA13,NDUFB7,NDUFS8,PPP3CB,PRKCD,PRKCH,RIPK1,SLC25A6,TIRAP
3-phosphoinositide Biosynthesis	2.42	ACP6,ENPP1,INPPL1,MTMR7,PPP1R14A,PPP1R3D,PPP2R2A,PPP2R2C,PPP3CB,SGPP1,SYNJ2
Dopamine-DARPP32 Feedback in cAMP Signaling	2.31	CACNB4,CSNK1E,ITPR3,PPP1R14A,PPP1R3D,PPP2R2A,PPP2R2C,PPP3CB,PRKCD,PRKCH
Sirtuin Signaling Pathway	2.15	BMAL1,CPT1A,CPT1B,FOXO1,MLYCD,NDUFA11,NDUFA13,NDUFB7,NDUFS8,NQO1,PPARA,SF3A2,SLC25A6
Cell Cycle Regulation by BTG Family Proteins	2.14	CCNE1,E2F8,PPP2R2A,PPP2R2C
HER-2 Signaling in Breast Cancer	2.13	CASP6,CASP7,CCNE1,EGFR,ETS1,FOXO1,LYN,MMP2,PRKCD,PRKCH,SURF1
Adipogenesis pathway	2.12	BMAL1,FOXO1,NFATC4,NR1D1,SMAD1,SOX9,TCF7,WNT5A
Senescence Pathway	2.05	ANAPC11,CACNB4,CCNE1,E2F8,ETS1,ITPR3,ITSN2,NFATC4,PPP2R2A,PPP2R2C,PPP3CB,SMAD1,TGFBR3
Glioblastoma Multiforme Signaling	2.04	CCNE1,E2F8,EGFR,FNBP1,FOXO1,ITPR3,PRKCD,WNT3,WNT5A
Superpathway of Inositol Phosphate Compounds	2.02	ACP6,ENPP1,INPPL1,MTMR7,PPP1R14A,PPP1R3D,PPP2R2A,PPP2R2C,PPP3CB,SGPP1,SYNJ2
Xenobiotic Metabolism General Signaling Pathway	2.01	ABCA2,FTL,GSTO2,MAP3K9,NQO1,PPARA,PRKCD,PRKCH
The Visual Cycle	1.91	DHRS7,RDH10,RDH11
Factors Promoting Cardiogenesis in Vertebrates	1.88	NPPA,PRKCD,PRKCH,SMAD1,TCF7,TGFBR3,WNT3,WNT5A
Epithelial Adherens Junction Signaling	1.81	EGFR,LATS2,NOTCH3,PPP2R2A,PPP2R2C,STK3,TCF7,TGFBR3
Prostanoid Biosynthesis	1.78	PTGES,PTGIS
BMAL1:CLOCK,NPAS2 activates circadian gene expression	1.77	BMAL1,BMAL2,PPARA
Production of Nitric Oxide and Reactive Oxygen Species in Macrophages	1.76	FNBP1,MAP3K9,PPARA,PPP1R14A,PPP1R3D,PPP2R2A,PPP2R2C,PRKCD,PRKCH
Neutrophil degranulation	1.74	AGL,CD58,CYSTM1,FTL,GCA,GGH,GLB1,GM2A,IMPDH2,LAMTOR3,MIF,NHLRC3,PRKCD,PSMD14,PTX3,TMC6,TMT1A
Role of Osteoblasts, Osteoclasts and Chondrocytes in Rheumatoid Arthritis	1.71	CSNK1E,FOXO1,NFATC4,PPP3CB,SMAD1,TCF7,TNFRSF11A,TRAF5,WNT3,WNT5A
Glycogen Degradation II	1.7	AGL,PGM5
Glutamate Removal from Folates	1.69	GGH
STAT3 Pathway	1.69	EGFR,IL13RA1,MAP3K9,NDUFA13,SOCS2,TGFBR3,TNFRSF11A
Apoptotic execution phase	1.68	CASP6,CASP7,GAS2,PRKCD
Signaling by PTK6	1.6	CCNE1,EGFR,ELMO2,LRRK2
Glycogen Degradation III	1.56	AGL,PGM5
Pancreatic Secretion Signaling Pathway	1.5	ARHGDIA,ARHGEF4,CA5B,EGFR,ITPR3,PPP1R14A,PPP1R3D,PRKCD,PRKCH,VTI1B
Circadian Clock	1.5	BMAL1,CSNK1E,NR1D1,PPARA
Carnitine metabolism	1.5	CPT1A,CPT1B
Visual phototransduction	1.47	HSD17B6,RDH10,RDH11,RGS9
Retinoic acid Mediated Apoptosis Signaling	1.47	CRABP1,CRABP2,PARP3,RARG
PCP (Planar Cell Polarity) Pathway	1.47	CTHRC1,VANGL1,WNT3,WNT5A
Transcriptional Regulation by NPAS4	1.47	ARNT2,BMAL1,MOV10
Synthesis of Prostaglandins (PG) and Thromboxanes (TX)	1.44	PTGES,PTGIS
Pulmonary Fibrosis Idiopathic Signaling Pathway	1.43	COL25A1,CXCL12,EGFR,FOXO1,IL13RA1,LATS2,MMP2,NOTCH3,TCF7,TGFBR3,WNT3,WNT5A
TWEAK Signaling	1.41	CASP6,CASP7,RIPK1
Choline Degradation I	1.4	CHDH
Sulfate Activation for Sulfonation	1.4	PAPSS2
GDP-L-fucose Biosynthesis I (from GDP-D-mannose)	1.4	GFUS
D-myo-inositol (1,4,5)-trisphosphate Degradation	1.39	INPPL1,SYNJ2
Role of Macrophages, Fibroblasts and Endothelial Cells in Rheumatoid Arthritis	1.38	CSNK1E,CXCL12,MIF,NFATC4,PPP3CB,PRKCD,PRKCH,RIPK1,TCF7,TRAF5,WNT3,WNT5A
Glutathione-mediated Detoxification	1.38	GGH,GSTO2,PTGES
NAFLD Signaling Pathway	1.38	CASP6,CASP7,CPT1A,CPT1B,FOXO1,PPARA,PPP2R2A,PPP2R2C,SOCS2
Protein Kinase A Signaling	1.37	ANAPC11,DUSP22,ENPP1,ITPR3,MPPE1,MTMR7,NFATC4,PPP1R14A,PPP1R3D,PPP3CB,PRKCD,PRKCH,PTPN3,TCF7
RHO GTPase cycle	1.37	AMIGO2,ARHGDIA,ARHGEF4,ARL13B,DOCK9,ELMO2,FNBP1,GJA1,ITSN2,MYO6,PLEKHG4B,STEAP3,SYDE1,VANGL1,VRK2
PXR/RXR Activation	1.37	CPT1A,FOXO1,PAPSS2,PPARA
Pyridoxal 5'-phosphate Salvage Pathway	1.37	CDK18,MAP3K9,PRKCD,PRKCH
Degradation of the extracellular matrix	1.34	ADAM15,CTSV,MMP2,NID1
1D-myo-inositol Hexakisphosphate Biosynthesis II (Mammalian)	1.34	INPPL1,SYNJ2
D-myo-inositol (1,3,4)-trisphosphate Biosynthesis	1.34	INPPL1,SYNJ2
Death Receptor Signaling	1.34	CASP6,CASP7,GAS2,PARP3,RIPK1
Salvage Pathways of Pyrimidine Ribonucleotides	1.32	CDK18,CMPK2,MAP3K9,PRKCD,PRKCH
Circadian Rhythm Signaling	1.32	ADCYAP1,BMAL1,CACNB4,CSNK1E,FBXL21P,ITPR3,LYN,NR1D1,PRKCD,PRKCH
Regulation of the Epithelial-Mesenchymal Transition Pathway	1.31	EGFR,ETS1,FGF11,MMP2,NOTCH3,TCF7,WNT3,WNT5A
Cell Cycle: G1/S Checkpoint Regulation	1.31	CCNE1,E2F8,FOXO1,RPL11
Cardiac conduction	1.3	FGF11,ITPR3,KCNK10,KCNK6,KCNK9,NPPA
Synaptic Long Term Depression	1.3	ABHD3,CACNB4,ITPR3,LYN,PPP2R2A,PPP2R2C,PRKCD,PRKCH
RORA activates gene expression	1.29	CPT1A,PPARA
Branched-chain amino acid catabolism	1.29	ACADSB,BCKDHA
Glycerophospholipid biosynthesis	1.29	ABHD3,ACP6,DGAT2,MBOAT1,MGLL
Transcriptional Regulatory Network in Embryonic Stem Cells	1.28	CDYL,INHBA,SALL4,SMAD1,TGFBR3,WNT3,WNT5A
Hepatic Fibrosis Signaling Pathway	1.28	CACNB4,CSNK1E,FNBP1,FOXO1,FTL,LEPR,PRKCD,PRKCH,RIPK1,TCF7,TGFBR3,TIRAP,WNT3,WNT5A
Synaptic Long Term Potentiation	1.28	ITPR3,PPP1R14A,PPP1R3D,PPP3CB,PRKCD,PRKCH
Mitochondrial L-carnitine Shuttle Pathway	1.25	CPT1A,CPT1B
ID1 Signaling Pathway	1.25	CCNE1,CHRNA1,EGFR,ETS1,LYN,MMP2,SMAD1,TGFBR3
Human Embryonic Stem Cell Pluripotency	1.25	FOXO1,INHBA,PRKCD,PRKCH,SALL4,SMAD1,WNT3,WNT5A
Retinoate Biosynthesis I	1.25	HSD17B6,RDH10,RDH11
Beta-catenin independent WNT signaling	1.24	ITPR3,MOV10,PPP3CB,TCF7,WNT5A
RAR Activation	1.23	CRABP1,CRABP2,ENPP1,FNBP1,HSD17B6,MMP2,MPPE1,PRKCD,RARG,RDH10,RDH11,SALL4,SOX9,TGFBR3
CXCR4 Signaling	1.23	CXCL12,ELMO2,FNBP1,ITPR3,LYN,PRKCD,PRKCH
Glycine Biosynthesis III	1.22	MGAT4A
Ascorbate Recycling (Cytosolic)	1.22	GSTO2
TP53 Regulates Transcription of Cell Death Genes	1.22	CASP6,RABGGTA,STEAP3
Opioid Signaling Pathway	1.22	CACNB4,ITPR3,LYN,OPRK1,PPP3CB,PRKCD,PRKCH,RGS16,RGS9,TCF7
Iron homeostasis signaling pathway	1.21	ABCB10,EGFR,FTL,SLC40A1,SMAD1,STEAP3
Signaling by Hippo	1.21	LATS2,STK3
Valine Degradation I	1.21	ACADSB,BCKDHA
GŒ±q Signaling	1.21	FNBP1,ITPR3,NFATC4,PPP3CB,PRKCD,PRKCH,RGS16
White Adipose Tissue Browning Pathway	1.2	CACNB4,ITPR3,NPPA,PPARA,RARG,THRB
Oxytocin Signaling Pathway	1.18	CACNB4,EGFR,GJA1,ITPR3,NPPA,PPARA,PPP1R14A,PPP3CB,PRKCD,PRKCH
Granzyme A Signaling	1.18	NDUFA11,NDUFA13,NDUFB7,NDUFS8
Heme signaling	1.18	BMAL1,NR1D1,PPARA
DNA damage-induced 14-3-3œÉ Signaling	1.18	CASP6,CASP7,CCNE1
Netrin Signaling	1.18	CACNB4,ITPR3,NFATC4,PPP3CB,PRKCD,PRKCH,VTI1B
nNOS Signaling in Neurons	1.15	PPP3CB,PRKCD,PRKCH
Glutaminergic Receptor Signaling Pathway (Enhanced)	1.15	ABHD3,CACNB4,DGKA,ITPR3,KCNK10,KCNK9,PPP3CB,PRKCD,PRKCH,SLC1A1,VTI1B
Chaperone Mediated Autophagy	1.14	ARL13B,IFT88
Superpathway of D-myo-inositol (1,4,5)-trisphosphate Metabolism	1.14	INPPL1,SYNJ2
G alpha (z) signalling events	1.13	PRKCD,PRKCH,RGS16
nNOS Signaling in Skeletal Muscle Cells	1.13	CACNB4,CHRNA1,ITPR3
Retinol Biosynthesis	1.13	DHRS7,RDH10,RDH11
Role of WNT/GSK-3Œ≤ Signaling in the Pathogenesis of Influenza	1.13	CSNK1E,TCF7,WNT3,WNT5A
Cardiac Œ≤-adrenergic Signaling	1.12	CACNB4,ENPP1,MPPE1,PPP1R14A,PPP1R3D,PPP2R2A,PPP2R2C
ERK/MAPK Signaling	1.12	ETS1,LAMTOR3,PPP1R14A,PPP1R3D,PPP2R2A,PPP2R2C,PRKCD,VRK2
Oxidative Phosphorylation	1.11	NDUFA11,NDUFA13,NDUFB7,NDUFS8,SURF1
NR1D1 (REV-ERBA) represses gene expression	1.1	NR1D1
Branched-chain Œ±-keto acid Dehydrogenase Complex	1.1	BCKDHA
Heme Biosynthesis from Uroporphyrinogen-III I	1.1	CPOX
Eumelanin Biosynthesis	1.1	MIF
Dopamine Receptor Signaling	1.1	PPP1R14A,PPP1R3D,PPP2R2A,PPP2R2C
Signaling by EGFR	1.09	ADAM12,EGFR,PTPN3
Signaling by NOTCH3	1.09	EGFR,HEY1,NOTCH3
IL-3 Signaling	1.08	FOXO1,PPP3CB,PRKCD,PRKCH
Endocannabinoid Cancer Inhibition Pathway	1.08	CASP6,CASP7,CCNE1,MMP2,TCF7,TRIB3
Growth hormone receptor signaling	1.07	LYN,SOCS2
Tumoricidal Function of Hepatic Natural Killer Cells	1.07	CASP6,CASP7
Transcriptional regulation by RUNX2	1.07	HEY1,SMAD1,SOX9
TNFR1 Signaling	1.07	CASP6,CASP7,RIPK1
UVC-Induced MAPK Signaling	1.07	EGFR,PRKCD,PRKCH
PI Metabolism	1.07	INPPL1,MTM1,MTMR7,SYNJ2
BEX2 Signaling Pathway	1.07	MMP2,PPP2R2A,PPP2R2C,TCF7
Signaling by ROBO receptors	1.06	CXCL12,ELOB,FLRT3,PPP3CB,PSMD14
PTEN Signaling	1.06	EGFR,FOXO1,INPPL1,SYNJ2,TGFBR3,TNFRSF11A
Cardiac Hypertrophy Signaling (Enhanced)	1.04	ACE,CACNB4,ENPP1,FGF11,IL13RA1,ITPR3,MAP3K9,MPPE1,NFATC4,NPPA,PPP3CB,PRKCD,PRKCH,TGFBR3,WNT3,WNT5A
Cyclins and Cell Cycle Regulation	1.02	CCNE1,E2F8,PPP2R2A,PPP2R2C
Cholecystokinin/Gastrin-mediated Signaling	1.02	EGFR,FNBP1,ITPR3,PRKCD,PRKCH
GNRH Signaling	1.02	CACNB4,EGFR,ITPR3,MAP3K9,MMP2,PRKCD,PRKCH
UVB-Induced MAPK Signaling	1.01	EGFR,PRKCD,PRKCH
WNT ligand biogenesis and trafficking	1.01	WNT3,WNT5A
Estrogen-mediated S-phase Entry	1.01	CCNE1,E2F8
Ubiquinol-10 Biosynthesis (Eukaryotic)	1.01	BCKDHA,CYP26B1
Lactose Degradation III	1.01	GLB1
Fc Epsilon RI Signaling	1.01	INPPL1,LYN,PRKCD,PRKCH,SYNJ2
Mitochondrial Dysfunction	1.01	CACNB4,CPOX,ITPR3,LRRK2,NDUFA11,NDUFA13,NDUFB7,NDUFS8,PPP3CB,PTGES,SURF1
Interleukin-3, Interleukin-5 and GM-CSF signaling	0.996	INPPL1,LYN,SYNJ2
Sphingolipid metabolism	0.995	GLB1,GM2A,SGPP1,SUMF1
Xenobiotic Metabolism CAR Signaling Pathway	0.994	CHST15,EGFR,GSTO2,PPP2R2A,PPP2R2C,PRKCD,PRKCH
Regulation of the Epithelial Mesenchymal Transition by Growth Factors Pathway	0.994	EGFR,ETS1,FGF11,FOXO1,LATS2,MEST,MMP2
Cardiomyocyte Differentiation via BMP Receptors	0.985	NPPA,SMAD1
Acetylcholine Receptor Signaling Pathway	0.976	CACNB4,CASP6,CASP7,CHRNA1,ITPR3,PRKCD,PRKCH
Ovarian Cancer Signaling	0.966	EGFR,GJA1,MMP2,TCF7,WNT3,WNT5A
MTOR signalling	0.958	EIF4G1,LAMTOR3
SUMOylation of intracellular receptors	0.958	PPARA,THRB
Iron uptake and transport	0.944	FTL,SLC40A1,STEAP3
Role of CHK Proteins in Cell Cycle Checkpoint Control	0.944	E2F8,PPP2R2A,PPP2R2C
Gap Junction Signaling	0.943	CSNK1E,EGFR,GJA1,ITPR3,PPP3CB,PRKCD,PRKCH
NRF2-mediated Oxidative Stress Response	0.938	CYP2U1,ENC1,FKBP5,FTL,GSTO2,NQO1,PRKCD,PRKCH
Oxytocin in Brain Signaling Pathway	0.934	ABHD3,ADCYAP1,CACNB4,EGFR,ITPR3,PRKCD,PRKCH
MAPK6/MAPK4 signaling	0.93	FOXO1,MMP2,MOV10,PSMD14
Electron transport, ATP synthesis, and heat production by uncoupling proteins	0.921	NDUFA11,NDUFA13,NDUFB7,NDUFS8,SURF1
RANK Signaling in Osteoclasts	0.917	MAP3K9,PPP3CB,TNFRSF11A,TRAF5
AMPK Signaling	0.916	CHRNA1,CPT1A,CPT1B,FOXO1,MLYCD,PFKFB2,PPP2R2A,PPP2R2C
G Beta Gamma Signaling	0.911	CACNB4,EGFR,ITPR3,PRKCD,PRKCH
Nucleotide catabolism	0.908	ADPRM,ENTPD5
Signaling by CSF3 (G-CSF)	0.908	ELOB,LYN
Clathrin-mediated endocytosis	0.901	EGFR,FNBP1,ITSN2,SYNJ2,WNT5A
Assembly of collagen fibrils and other multimeric structures	0.896	CTSV,LOXL2,LOXL4
Class B/2 (Secretin family receptors)	0.893	ADCYAP1,ADM2,WNT3,WNT5A
ERBB Signaling	0.893	EGFR,FOXO1,PRKCD,PRKCH
Role of Osteoblasts in Rheumatoid Arthritis Signaling Pathway	0.887	CSNK1E,CTSV,CXCL12,MMP2,SMAD1,TCF7,WNT3,WNT5A
Signaling by CSF1 (M-CSF) in myeloid cells	0.885	INPPL1,LYN
Prolactin Signaling	0.881	PRKCD,PRKCH,SOCS2,TCF7
Role of JAK2 in Hormone-like Cytokine Signaling	0.881	LEPR,SH2B3,SOCS2
Aryl hydrocarbon receptor signalling	0.874	ARNT2
fMLP Signaling in Neutrophils	0.871	ITPR3,NFATC4,PPP3CB,PRKCD,PRKCH
Transcriptional Regulation by MECP2	0.866	FKBP5,MOV10,OPRK1
DNA Methylation and Transcriptional Repression Signaling	0.858	CDK18,E2F8,TCF7,UHRF1
Docosahexaenoic Acid (DHA) Signaling	0.846	ABHD3,CASP7,FOXO1,ITPR3,PRKCD,PRKCH,SYNJ2,SYT13
Class I MHC mediated antigen processing and presentation	0.842	ANAPC11,CTSV,DTX3L,ELOB,FBXL4,FBXO4,FBXO9,PSMD14,RNF220,TIRAP,UNKL
Activation of Matrix Metalloproteinases	0.841	CTSV,MMP2
RAB geranylgeranylation	0.837	RAB15,RAB33B,RABGGTA
ABC-family proteins mediated transport	0.824	ABCA2,ABCA5,ABCB10,PSMD14
Xenobiotic Metabolism Signaling	0.823	CHST15,FTL,GSTO2,MAP3K9,NQO1,PPP2R2A,PPP2R2C,PRKCD,PRKCH
Gap junction trafficking and regulation	0.82	GJA1,MYO6
Oncogene Induced Senescence	0.82	ETS1,MOV10
Late endosomal microautophagy	0.82	ARL13B,IFT88
Histidine catabolism	0.82	HNMT
DNA Damage Reversal	0.82	ALKBH2
Superoxide Radicals Degradation	0.82	NQO1
Phase I - Functionalization of compounds	0.813	ARNT2,CYP26B1,CYP2U1,PTGIS
Mitotic Roles of Polo-Like Kinase	0.809	ANAPC11,PPP2R2A,PPP2R2C
Insulin Receptor Signaling	0.805	FOXO1,INPPL1,PPP1R14A,PPP1R3D,SYNJ2
Potassium Channels	0.802	KCNK10,KCNK6,KCNK9,KCNS3
Transcriptional regulation by the AP-2 (TFAP2) family of transcription factors	0.781	DEK,EGFR
FLT3 Signaling	0.781	SH2B3,SOCS2
Lysine catabolism	0.773	HYKK
Sphingosine and Sphingosine-1-phosphate Metabolism	0.773	SGPP1
Heme Biosynthesis II	0.773	CPOX
Salvage Pathways of Pyrimidine Deoxyribonucleotides	0.773	TK2
Folate Transformations I	0.773	MTHFS
WNK Renal Signaling Pathway	0.771	ANAPC11,ELOB,PRKCD,PRKCH
TP53 Regulates Transcription of DNA Repair Genes	0.769	AP1S3,ELOB,RAD51D
Eicosanoid Signaling	0.769	ABHD3,PTGES,PTGIS
C-type lectin receptors (CLRs)	0.762	ITPR3,LYN,PPP3CB,PRKCD,PSMD14
Signaling by VEGF	0.751	ELMO2,ITPR3,PRKCD,TRIB3
Growth Hormone Signaling	0.745	PRKCD,PRKCH,SOCS2
Basal Cell Carcinoma Signaling	0.745	TCF7,WNT3,WNT5A
GM-CSF Signaling	0.745	ETS1,LYN,PPP3CB
Notch Signaling	0.744	HEY1,NOTCH3
Role of Osteoclasts in Rheumatoid Arthritis Signaling Pathway	0.741	ADAM12,ADAM15,COL25A1,FNBP1,FOXO1,MMP2,PPP3CB,TNFRSF11A,TRAF5
Telomerase Signaling	0.732	EGFR,ETS1,PPP2R2A,PPP2R2C
RHOBTB3 ATPase cycle	0.732	CCNE1
Inhibition of Matrix Metalloproteases	0.727	ADAM12,MMP2
trans-Golgi Network Vesicle Budding	0.721	AP1S3,FTL,SH3D19
Transcriptional Regulation by VENTX	0.71	ANAPC11,MOV10
Pyrimidine Ribonucleotides Interconversion	0.71	CMPK2,ENTPD5
Insulin Secretion Signaling Pathway	0.697	CACNB4,EIF4G1,EIF4G3,ITPR3,LYN,PRKCD,PRKCH,VTI1B
Type II Diabetes Mellitus Signaling	0.697	CACNB4,ITPR3,PRKCD,PRKCH,SOCS2
Signaling by Leptin	0.695	LEPR
Alpha-protein kinase 1 signaling pathway	0.695	ALPK1
Purine Nucleotides De Novo Biosynthesis II	0.695	IMPDH2
GDP-glucose Biosynthesis	0.695	PGM5
DAG and IP3 signaling	0.694	ITPR3,PRKCD
Mechanisms of Viral Exit from Host Cells	0.694	PRKCD,PRKCH
CDK5 Signaling	0.686	PPP1R14A,PPP1R3D,PPP2R2A,PPP2R2C
Xenobiotic Metabolism PXR Signaling Pathway	0.686	CHST15,GSTO2,PPP1R14A,PPP1R3D,PRKCD,PRKCH
Endothelin-1 Signaling	0.679	ABHD3,CASP6,CASP7,ITPR3,PRKCD,PRKCH
April Mediated Signaling	0.678	NFATC4,TRAF5
Acetone Degradation I (to Methylglyoxal)	0.678	CYP2U1,DHRS7
VDR/RXR Activation	0.675	FOXO1,PRKCD,PRKCH
Estrogen Receptor Signaling	0.665	CACNB4,EGFR,FOXO1,LEPR,MMP2,NDUFA11,NDUFA13,NDUFB7,NDUFS8,PRKCD,PRKCH
Signaling by SCF-KIT	0.663	LYN,SH2B3
Aggrephagy	0.663	ARL13B,IFT88
B Cell Activating Factor Signaling	0.663	NFATC4,TRAF5
Pyrimidine Ribonucleotides De Novo Biosynthesis	0.663	CMPK2,ENTPD5
Presynaptic depolarization and calcium channel opening	0.661	CACNB4
Reversible hydration of carbon dioxide	0.661	CA5B
Peptide hormone biosynthesis	0.661	INHBA
HDR through MMEJ (alt-NHEJ)	0.661	POLQ
Glucose and Glucose-1-phosphate Degradation	0.661	PGM5
GPCR-Mediated Nutrient Sensing in Enteroendocrine Cells	0.66	CACNB4,ITPR3,PRKCD,PRKCH
eNOS Signaling	0.66	CHRNA1,HSPA2,ITPR3,PRKCD,PRKCH
TCF dependent signaling in response to WNT	0.659	CSNK1E,PSMD14,SOX9,TCF7,WNT3,WNT5A
NF-Œ∫B Activation by Viruses	0.654	PRKCD,PRKCH,RIPK1
PI3K/AKT Signaling	0.653	FOXO1,IL13RA1,INPPL1,PPP2R2A,PPP2R2C,SYNJ2
Synthesis of DNA	0.651	ANAPC11,CCNE1,DNA2,PSMD14
Elastic fibre formation	0.648	LOXL2,LOXL4
Regulation of mRNA stability by proteins that bind AU-rich elements	0.648	EIF4G1,PRKCD
Cilium Assembly	0.647	ARL13B,CSNK1E,IFT88,RAB3IP,TCTN2,TTC30A
Huntington's Disease Signaling	0.643	CASP6,CASP7,EGFR,HSPA2,PRKCD,PRKCH,PSMD14,VTI1B
Virus Entry via Endocytic Pathways	0.643	AP1S3,AP5B1,PRKCD,PRKCH
Trafficking and processing of endosomal TLR	0.631	CTSV
POU5F1 (OCT4), SOX2, NANOG activate genes related to proliferation	0.631	SALL4
Mitochondrial calcium ion transport	0.631	MCUB
Processing of SMDT1	0.631	MCUB
Transcriptional regulation of testis differentiation	0.631	SOX9
Azathioprine ADME	0.631	IMPDH2
NAD Phosphorylation and Dephosphorylation	0.631	ACP6
Neddylation	0.629	ANKRD9,ELOB,FBXL4,FBXO4,FBXO9,PSMD14,SOCS2
Sphingosine-1-phosphate Signaling	0.627	CASP6,CASP7,FNBP1,S1PR3
Nitric Oxide Signaling in the Cardiovascular System	0.627	CACNB4,ITPR3,PRKCD,PRKCH
Transport of bile salts and organic acids, metal ions and amine compounds	0.624	EMB,SLC30A3,SLC40A1
Interleukin-2 family signaling	0.62	INPPL1,SYNJ2
Role of OCT4 in Mammalian Embryonic Stem Cell Pluripotency	0.62	CASP6,SALL4
tRNA Splicing	0.62	ENPP1,MPPE1
Estrogen Biosynthesis	0.62	CYP2U1,HSD17B6
Renin-Angiotensin Signaling	0.619	ACE,ITPR3,PRKCD,PRKCH
Acetylcholine binding and downstream events	0.603	CHRNA1
LGI-ADAM interactions	0.603	LGI2
Formation of axial mesoderm	0.603	TCF7
DNA Double-Strand Break Repair by Non-Homologous End Joining	0.603	LIG4
Urate Biosynthesis/Inosine 5'-phosphate Degradation	0.603	IMPDH2
Colanic Acid Building Blocks Biosynthesis	0.603	GFUS
Role of NANOG in Mammalian Embryonic Stem Cell Pluripotency	0.596	SALL4,SMAD1,WNT3,WNT5A
Glioma Signaling	0.588	E2F8,EGFR,PRKCD,PRKCH
HIF1Œ± Signaling	0.587	ELOB,HSPA2,MMP2,PPP3CB,PRKCD,PRKCH
Regulation of the Epithelial Mesenchymal Transition in Development Pathway	0.586	TCF7,WNT3,WNT5A
TP53 Regulates Transcription of Cell Cycle Genes	0.581	CCNE1,E2F8
Signaling by Activin	0.577	INHBA
YAP1- and WWTR1 (TAZ)-stimulated gene expression	0.577	NPPA
Platelet Adhesion to exposed collagen	0.577	LYN
Response of EIF2AK1 (HRI) to heme deficiency	0.577	TRIB3
Assembly of RNA Polymerase III Complex	0.577	SF3A2
TP53 Regulates Metabolic Genes	0.576	LAMTOR3,MOV10,SURF1
GP6 Signaling Pathway	0.573	COL25A1,LYN,PRKCD,PRKCH
LPS/IL-1 Mediated Inhibition of RXR Function	0.571	CHST15,CPT1A,CPT1B,CYP2U1,GSTO2,PAPSS2,PPARA
Sperm Motility	0.571	ABHD3,EGFR,ITPR3,LYN,NPPA,PRKCD,PRKCH
Signaling by ERBB2	0.569	EGFR,PRKCD
Signaling by FGFR1	0.569	ANOS1,FLRT3
NR1H2 and NR1H3-mediated signaling	0.569	ARL4C,MOV10
Mitotic G1 phase and G1/S transition	0.559	CCNE1,LYN,PPP2R2A,PSMD14
Opioid Signalling	0.559	ITPR3,PPP3CB,PRKCD
Caspase activation via Death Receptors in the presence of ligand	0.553	RIPK1
FOXO-mediated transcription of cell death genes	0.553	FOXO1
Chondroitin Sulfate Degradation (Metazoa)	0.553	GM2A
Glutaryl-CoA Degradation	0.553	CDYL
Factors involved in megakaryocyte development and platelet production	0.55	DOCK9,EHD1,SH2B3
ABRA Signaling Pathway	0.542	CPT1B,PPP1R14A,PPP3CB
HGF Signaling	0.538	ETS1,MAP3K9,PRKCD,PRKCH
Ceramide Signaling	0.533	PPP2R2A,PPP2R2C,S1PR3
Transcriptional regulation of pluripotent stem cells	0.531	SALL4
Protein methylation	0.531	ETFBKMT
FOXO-mediated transcription of cell cycle genes	0.531	FOXO1
Germ layer formation at gastrulation	0.531	TCF7
Isoleucine Degradation I	0.531	ACADSB
Dermatan Sulfate Degradation (Metazoa)	0.531	GM2A
Interferon gamma signaling	0.525	MID1,PRKCD,TRIM68
FcŒ≥ Receptor-mediated Phagocytosis in Macrophages and Monocytes	0.525	LYN,PRKCD,PRKCH
Hepatic Cholestasis	0.522	FOXO1,PPARA,PPP3CB,PRKCD,PRKCH,TIRAP
Glucocorticoid Receptor Signaling	0.522	EGFR,FKBP5,GJA1,HSPA2,IL13RA1,MMP2,NDUFA11,NDUFA13,NDUFB7,NDUFS8,NFATC4,NPPA,PPP3CB,RARG
Tight Junction Signaling	0.518	CLDN11,PATJ,PPP2R2A,PPP2R2C,VTI1B
Tumor Microenvironment Pathway	0.513	CXCL12,FGF11,FOXO1,LEPR,MMP2
HSP90 chaperone cycle for steroid hormone receptors in the presence of ligand	0.512	FKBP5,HSPA2
Nicotinate metabolism	0.51	PTGIS
Metabolism of Angiotensinogen to Angiotensins	0.51	ACE
Gastrin-CREB signalling pathway via PKC and MAPK	0.51	EGFR
Role of NFAT in Cardiac Hypertrophy	0.507	CACNB4,ITPR3,NFATC4,PPP3CB,PRKCD,PRKCH
DHCR24 Signaling Pathway	0.505	PRKCD,PRKCH,SOX9,THRB
Thrombin Signaling	0.502	ARHGEF4,EGFR,FNBP1,ITPR3,PRKCD,PRKCH
CSDE1 Signaling Pathway	0.502	LINC00205,RPL9
Cell Cycle Control of Chromosomal Replication	0.502	CDK18,DNA2
Triacylglycerol Biosynthesis	0.502	DGAT2,MBOAT1
Reelin Signaling in Neurons	0.499	ARHGEF4,LYN,MAP3K9,PAFAH1B3
Protein folding	0.494	CCNE1,FBXO4,RGS9
Role of Chondrocytes in Rheumatoid Arthritis Signaling Pathway	0.493	CXCL12,MMP2,PPP3CB,RIPK1
CD27 Signaling in Lymphocytes	0.491	MAP3K9,TRAF5
Regulation of TP53 Activity through Methylation	0.491	L3MBTL1
FOXO-mediated transcription	0.491	FOXO1
NFE2L2 regulating anti-oxidant/detoxification enzymes	0.491	NQO1
Purine Nucleotides Degradation II (Aerobic)	0.491	IMPDH2
Acute Phase Response Signaling	0.491	CRABP1,CRABP2,FTL,RIPK1,SOCS2
EGF Signaling	0.481	EGFR,ITPR3
Cachexia Signaling Pathway	0.478	CASP6,CASP7,FOXO1,HSPA2,INHBA,PRKCD,PRKCH,PSMD14,TGFBR3
Androgen Biosynthesis	0.473	HSD17B6
Signaling by ERBB4	0.472	CXCL12,EGFR
Metabolism of water-soluble vitamins and cofactors	0.472	ENPP1,GSTO2
Metabolism of polyamines	0.472	NQO1,PSMD14
Chronic Myeloid Leukemia Signaling	0.465	E2F8,NFATC4,NOTCH3,PPP3CB,TCF7,WNT3,WNT5A
cAMP-mediated signaling	0.46	ENPP1,LAMTOR3,MPPE1,OPRK1,PPP3CB,S1PR3
Osteoarthritis Pathway	0.46	CASP6,CASP7,S1PR3,SMAD1,SOX9,TCF7
Axonal Guidance Signaling	0.459	ACE,ADAM12,ADAM15,CXCL12,MMP2,NFATC4,PPP3CB,PRKCD,PRKCH,PSMD14,WNT3,WNT5A
Neuropathic Pain Signaling in Dorsal Horn Neurons	0.458	ITPR3,PRKCD,PRKCH
Sumoylation Pathway	0.458	ARHGDIA,ETS1,FNBP1
Myelination Signaling Pathway	0.456	EGFR,LYN,NFATC4,OPRK1,PPP3CB,SMAD1,WNT3,WNT5A
Interleukin-7 signaling	0.456	SOCS2
Nucleotide salvage	0.456	TK2
Histamine Degradation	0.456	HNMT
Endoplasmic Reticulum Stress Pathway	0.456	CASP7
Collagen degradation	0.453	COL25A1,MMP2
Apoptosis Signaling	0.451	CASP6,CASP7,GAS2
Sertoli Cell-Germ Cell Junction Signaling Pathway (Enhanced)	0.451	CLDN11,GJA1,MAP3K9,MMP2,PPP2R2A,PPP2R2C
Endocannabinoid Neuronal Synapse Pathway	0.445	CACNB4,ITPR3,MGLL,PPP3CB
Cytoprotection by HMOX1	0.444	PPARA,SURF1
Orexin Signaling Pathway	0.442	CACNB4,FOXO1,ITPR3,PRKCD,PRKCH,SMAD1
Leukocyte Extravasation Signaling	0.44	CLDN11,CXCL12,MMP2,PRKCD,PRKCH
PTEN Regulation	0.44	LAMTOR3,MOV10,PSMD14,SALL4
RHO GTPases Activate NADPH Oxidases	0.44	PRKCD
Pregnenolone Biosynthesis	0.44	CYP26B1
Extracellular matrix organization	0.438	ADAM12,ADAM15,NID1
Cargo recognition for clathrin-mediated endocytosis	0.431	EGFR,ITSN2,WNT5A
Corticotropin Releasing Hormone Signaling	0.429	CACNB4,ITPR3,PRKCD,PRKCH
Mitochondrial biogenesis	0.427	NR1D1,PPARA
Metabolism of porphyrins	0.424	CPOX
Pyrimidine Deoxyribonucleotides De Novo Biosynthesis I	0.424	CMPK2
Tryptophan Degradation III (Eukaryotic)	0.424	CDYL
Histidine Degradation VI	0.424	CYP26B1
Vitamin-C Transport	0.424	GSTO2
Molecular Mechanisms of Cancer	0.42	ARHGEF4,CASP6,CASP7,CCNE1,E2F8,FNBP1,FOXO1,HEY1,IL13RA1,LAMTOR3,MMP2,OPRK1,PRKCD,PRKCH,S1PR3,SMAD1,TCF7,TSHR,WNT5A
Thrombopoietin Signaling	0.419	PRKCD,PRKCH
Induction of Apoptosis by HIV1	0.419	RIPK1,SLC25A6
Œ±-Adrenergic Signaling	0.418	ITPR3,PRKCD,PRKCH
Interleukin-4 and Interleukin-13 signaling	0.412	FOXO1,IL13RA1,MMP2
Kinetochore Metaphase Signaling Pathway	0.412	ANAPC11,PPP1R14A,PPP1R3D
WNT/Ca+ pathway	0.41	NFATC4,WNT5A
Other interleukin signaling	0.41	STX3
Regulation of RUNX1 Expression and Activity	0.41	MOV10
Glycogen metabolism	0.41	AGL
Fcgamma receptor (FCGR) dependent phagocytosis	0.403	ELMO2,ITPR3,LYN,PRKCD
CDX Gastrointestinal Cancer Signaling Pathway	0.399	EGFR,SALL4,TCF7,WNT3,WNT5A
Insulin processing	0.396	ERO1B
Signaling by Erythropoietin	0.396	LYN
Bupropion Degradation	0.396	CYP2U1
TNFR2 non-canonical NF-kB pathway	0.395	PSMD14,TNFRSF11A
Aryl Hydrocarbon Receptor Signaling	0.393	CCNE1,GSTO2,NQO1,RARG
Agrin Interactions at Neuromuscular Junction	0.387	CHRNA1,EGFR
Signaling by BMP	0.383	SMAD1
Miscellaneous transport and binding events	0.383	NIPAL1
DNA methylation	0.383	UHRF1
IL-17A Signaling in Gastric Cells	0.383	EGFR
ERBB4 Signaling	0.38	PRKCD,PRKCH
Clathrin-mediated Endocytosis Signaling	0.377	AP1S3,AP5B1,FGF11,MYO6,PPP3CB
Role of Tissue Factor in Cancer	0.377	EGFR,LYN,MMP2,PPP2R2A,TGFBR3
Bladder Cancer Signaling	0.377	EGFR,FGF11,MMP2
Agranulocyte Adhesion and Diapedesis	0.373	CD34,CLDN11,CXCL12,MMP2,PODXL
ISG15 antiviral mechanism	0.372	EIF4G1,EIF4G3
Neuregulin Signaling	0.371	EGFR,PRKCD,PRKCH
NAD Salvage Pathway II	0.371	ACP6
IL-13 Signaling Pathway	0.366	IL13RA1,LYN,PRKCD
Amyotrophic Lateral Sclerosis Signaling	0.366	CACNB4,CASP7,NEFM
ESR-mediated signaling	0.366	CXCL12,FKBP5,MOV10
Melatonin Signaling	0.365	PRKCD,PRKCH
Ephrin B Signaling	0.365	CXCL12,ITSN2
IL-8 Signaling	0.365	EGFR,FNBP1,MMP2,PRKCD,PRKCH
HOTAIR Regulatory Pathway	0.365	MMP2,TCF7,WNT3,WNT5A
Signaling by ALK	0.359	PTN
Glyoxylate metabolism and glycine degradation	0.359	BCKDHA
RHO GTPases activate PKNs	0.359	PPP1R14A
Glutathione Redox Reactions I	0.359	PTGES
CDP-diacylglycerol Biosynthesis I	0.359	MBOAT1
Extra-nuclear estrogen signaling	0.358	EGFR,MMP2
Amyloid fiber formation	0.358	MFGE8,NPPA
Autism Signaling Pathway	0.355	BCKDHA,CACNB4,CNTNAP2,RARG,TCF7,WNT3,WNT5A
Energy dependent regulation of mTOR by LKB1-AMPK	0.348	LAMTOR3
Androgen Signaling	0.347	CACNB4,ITPR3,PRKCD,PRKCH
Autophagy	0.346	FOXO1,PPP2R2A,PPP2R2C,PPP3CB,RIPK1
Cellular response to hypoxia	0.345	ELOB,PSMD14
Glioma Invasiveness Signaling	0.345	FNBP1,MMP2
GPCR-Mediated Integration of Enteroendocrine Signaling Exemplified by an L Cell	0.345	ADCYAP1,ITPR3
Signaling by the B Cell Receptor (BCR)	0.343	ITPR3,LYN,PPP3CB,PSMD14
Pre-NOTCH Expression and Processing	0.339	MOV10,NOTCH3
Activin Inhibin Signaling Pathway	0.338	INHBA,MMP2,SMAD1,TCF7,TGFBR3
FOXO-mediated transcription of oxidative stress, metabolic and neuronal genes	0.337	FOXO1
Phosphatidylglycerol Biosynthesis II (Non-plastidic)	0.337	MBOAT1
Regulation of Insulin-like Growth Factor (IGF) transport and uptake by IGFBPs	0.335	MFGE8,MGAT4A,MMP2
Calcium Signaling	0.334	CACNB4,CHRNA1,ITPR3,NFATC4,PPP3CB
Ribonucleotide Reductase Signaling Pathway	0.334	E2F8,EGFR,MMP2,PARP3
Synaptogenesis Signaling Pathway	0.333	CACNB4,CNTNAP2,ITSN2,LYN,PRKCD,SYT13,VTI1B
Leptin Signaling in Obesity	0.332	FOXO1,LEPR
Macropinocytosis Signaling	0.332	PRKCD,PRKCH
Bile acid and bile salt metabolism	0.327	PTGIS
Methylglyoxal Degradation III	0.327	DHRS7
Neuroinflammation Signaling Pathway	0.327	CXCL12,MFGE8,NFATC4,PPP3CB,RIPK1,TGFBR3,TIRAP
Costimulation by the CD28 family	0.326	LYN,TRIB3
Toll-like Receptor Signaling	0.326	PPARA,TIRAP
Aldosterone Signaling in Epithelial Cells	0.326	HSPA2,ITPR3,PRKCD,PRKCH
ROBO SLIT Signaling Pathway	0.32	CNTNAP2,LYN,MMP2
Thyroid Cancer Signaling	0.32	FOXO1,TCF7
Colorectal Cancer Metastasis Signaling	0.319	EGFR,FNBP1,MMP2,TCF7,WNT3,WNT5A
Toll Like Receptor 3 (TLR3) Cascade	0.317	RIPK1
Glutamate binding, activation of AMPA receptors and synaptic plasticity	0.317	MYO6
RIPK1-mediated regulated necrosis	0.317	RIPK1
Role of p14/p19ARF in Tumor Suppression	0.317	SF3A2
Pancreatic Adenocarcinoma Signaling	0.316	CCNE1,E2F8,EGFR
Glycosaminoglycan metabolism	0.314	B4GALT4,PAPSS2
IL-7 Signaling Pathway	0.314	FOXO1,LYN
14-3-3-mediated Signaling	0.311	FOXO1,PRKCD,PRKCH
Renal Cell Carcinoma Signaling	0.308	ELOB,ETS1
Ferroptosis Signaling Pathway	0.302	FTL,LINC00472,STEAP3
Triglyceride metabolism	0.299	MGLL
RNA polymerase II transcribes snRNA genes	0.297	ELL2,INTS14
Signaling by NOTCH4	0.297	HEY1,PSMD14
Neurovascular Coupling Signaling Pathway	0.293	ABHD3,CACNB4,ENTPD5,GJA1,ITPR3
Estrogen-Dependent Breast Cancer Signaling	0.291	EGFR,HSD17B6
GPVI-mediated activation cascade	0.29	LYN
BAG2 Signaling Pathway	0.286	HSPA2,PSMD14
IL-9 Signaling	0.282	SOCS2
MIF-mediated Glucocorticoid Regulation	0.282	MIF
Platelet homeostasis	0.281	ITPR3,P2RX4
Hedgehog 'on' state	0.281	PSMD14,SPOPL
VEGF Family Ligand-Receptor Interactions	0.281	PRKCD,PRKCH
PEDF Signaling	0.281	CASP7,TCF7
SNARE Signaling Pathway	0.281	CACNB4,SYT13,VTI1B
Role of PKR in Interferon Induction and Antiviral Response	0.281	HSPA2,SCARA3,TIRAP
CCR3 Signaling in Eosinophils	0.281	ITPR3,PRKCD,PRKCH
FXR/RXR Activation	0.277	FOXO1,GSTO2,NQO1,PPARA
LPS-stimulated MAPK Signaling	0.276	PRKCD,PRKCH
Xenobiotic Metabolism AHR Signaling Pathway	0.276	GSTO2,NQO1
MyD88-independent TLR4 cascade	0.274	RIPK1
Gene and protein expression by JAK-STAT signaling after IL-12 stimulation	0.274	MIF
Regulation of mitotic cell cycle	0.271	ANAPC11,PSMD14
GABAergic Receptor Signaling Pathway (Enhanced)	0.269	CACNB4,CNTNAP2,ITPR3
RAB GEFs exchange GTP for GDP on RABs	0.266	DENND1B,RAB3IP
PDGF Signaling	0.266	INPPL1,SYNJ2
PIP3 activates AKT signaling	0.265	EGFR,FOXO1,TRIB3
Immunogenic Cell Death Signaling Pathway	0.261	HSPA2,RIPK1
Regulation of Cellular Mechanics by Calpain Protease	0.261	CCNE1,EGFR
Unfolded protein response	0.261	ERO1B,HSPA2
NER (Nucleotide Excision Repair, Enhanced Pathway)	0.261	DNA2,LIG4
MSP-RON Signaling in Cancer Cells Pathway	0.257	EGFR,ETS1,TCF7
Degradation of beta-catenin by the destruction complex	0.256	PSMD14,TCF7
KEAP1-NFE2L2 pathway	0.256	PRKCD,PSMD14
Hepatic Fibrosis / Hepatic Stellate Cell Activation	0.254	COL25A1,EGFR,LEPR,MMP2
Neurotransmitter release cycle	0.252	SLC1A1
Cell junction organization	0.252	CLDN11,PATJ
G alpha (s) signalling events	0.246	ADCYAP1,ADM2,TSHR
Gamma carboxylation, hypusine formation and arylsulfatase activation	0.245	SUMF1
Activation of gene expression by SREBF (SREBP)	0.245	PPARA
Transport of vitamins, nucleosides, and related molecules	0.245	SLC25A6
EPH-Ephrin signaling	0.243	LYN,MMP2
MyD88:MAL(TIRAP) cascade initiated on plasma membrane	0.238	TIRAP
Regulation of beta-cell development	0.238	FOXO1
Formation of WDR5-containing histone-modifying complexes	0.238	SGF29
Mitochondrial translation	0.234	MRPL53,MRPL54
Transcriptional regulation by RUNX3	0.234	PSMD14,TCF7
Non-Small Cell Lung Cancer Signaling	0.234	EGFR,ITPR3
TGF-Œ≤ Signaling	0.234	INHBA,SMAD1
Small Cell Lung Cancer Signaling	0.226	CCNE1,TRAF5
PI3K Cascade	0.226	TRIB3
TAK1-dependent IKK and NF-kappa-B activation	0.226	ALPK1
TBC/RABGAPs	0.226	RAB33B
Collagen chain trimerization	0.226	COL25A1
Retinoid metabolism and transport	0.226	RDH11
MIF Regulation of Innate Immunity	0.226	MIF
Arachidonic acid metabolism	0.22	CYP2U1
Coronavirus Replication Pathway	0.22	ACE
Cytosolic sensors of pathogen-associated DNA	0.214	RIPK1
Role of RIG1-like Receptors in Antiviral Innate Immunity	0.214	RIPK1
Sensory perception of taste	0.208	ITPR3
Nonhomologous End-Joining (NHEJ)	0.198	LIG4
Dilated Cardiomyopathy Signaling Pathway	0	CACNB4,ITPR3
NAD Signaling Pathway	0	BMAL1,GJA1,PARP3
Wound Healing Signaling Pathway	0	COL25A1,EGFR,TGFBR3
Macrophage Classical Activation Signaling Pathway	0	IL13RA1
MicroRNA Biogenesis Signaling Pathway	0	EGFR,SF3A2,SMAD1
Multiple Sclerosis Signaling Pathway	0	P2RX4,PARP3
Pathogen Induced Cytokine Storm Signaling Pathway	0	CASP7,COL25A1,CXCL12,FTL,RIPK1
Natural Killer Cell Signaling	0	HSPA2,MAP3K9,NFATC4
Macrophage Alternative Activation Signaling Pathway	0	IL13RA1
S100 Family Signaling Pathway	0	CACNB4,CASP7,EGFR,ITPR3,MMP2,OPRK1,PRKCD,PRKCH,S1PR3,SMAD1,TCF7,TSHR,WNT3,WNT5A
Actin Cytoskeleton Signaling	0	ARHGEF4,FGF11
Chaperone Mediated Autophagy Signaling Pathway	0	BMAL1,HSPA2,LRRK2,MMP2,PPP3CB
IL-33 Signaling Pathway	0	CASP6,CASP7,MMP2
NOD1/2 Signaling Pathway	0	HSPA2
Adrenergic Receptor Signaling Pathway (Enhanced)	0	CACNB4,ITPR3,PRKCD,PRKCH
ISGylation Signaling Pathway	0	DTX3L
Microautophagy Signaling Pathway	0	COL25A1,PSMD14,SPATA18
NFKBIE Signaling Pathway	0	RIPK1
PPARŒ±/RXRŒ± Activation	0	CPT1B,PPARA,TGFBR3
p53 Signaling	0	CASP6
Intrinsic Pathway for Apoptosis	0	CASP7
G alpha (i) signalling events	0	CXCL12,OPRK1,RGS16,RGS9,S1PR3
Meiotic synapsis	0	HSPA2
Mitochondrial protein import	0	SLC25A6
The citric acid (TCA) cycle and respiratory electron transport	0	PDP1
Phase II - Conjugation of compounds	0	PAPSS2
Telomere Maintenance	0	DNA2
Macroautophagy	0	LAMTOR3
Integration of energy metabolism	0	ITPR3,KCNS3
Collagen biosynthesis and modifying enzymes	0	COL25A1
DDX58/IFIH1-mediated induction of interferon-alpha/beta	0	RIPK1
Regulation of Apoptosis	0	PSMD14
Signaling by NTRK1 (TRKA)	0	ADCYAP1
p75 NTR receptor-mediated signalling	0	ARHGDIA,ARHGEF4
Signaling by NOTCH1	0	HEY1
Immunoregulatory interactions between a Lymphoid and a non-Lymphoid cell	0	CD34
TCR signaling	0	PSMD14
Cell surface interactions at the vascular wall	0	CD58,LYN,MIF
Generic Transcription Pathway	0	NOTCH3,NR1D1,PPARA,RARG,THRB,ZNF213,ZNF621,ZNF726
RNA Polymerase II Transcription	0	ELOB
COPII-mediated vesicle transport	0	GORASP1
MHC class II antigen presentation	0	AP1S3,CTSV
Binding and Uptake of Ligands by Scavenger Receptors	0	FTL
Fc epsilon receptor (FCERI) signaling	0	ITPR3,LYN,PPP3CB,PSMD14
Mitotic Metaphase and Anaphase	0	ANAPC11,PPP2R2A,PSMD14,VRK2
Oxidative Stress Induced Senescence	0	MOV10
Senescence-Associated Secretory Phenotype (SASP)	0	ANAPC11
DNA Damage/Telomere Stress Induced Senescence	0	CCNE1
Cellular response to heat stress	0	HSPA2
Class A/1 (Rhodopsin-like receptors)	0	CXCL12,OPRK1,TSHR
L1CAM interactions	0	EGFR
NCAM signaling for neurite out-growth	0	CACNB4
Transcriptional regulation of white adipocyte differentiation	0	PPARA
G alpha (q) signalling events	0	RGS16
G alpha (12/13) signalling events	0	ARHGEF4
Transport of inorganic cations/anions and amino acids/oligopeptides	0	SLC1A1,SLC9A7
Deadenylation-dependent mRNA decay	0	EIF4G1
Interleukin-1 family signaling	0	PSMD14
Mitotic G2-G2/M phases	0	CSNK1E,PPP2R2A,PSMD14,TUBG2
B-WICH complex positively regulates rRNA expression	0	DEK
Hedgehog ligand biogenesis	0	PSMD14
Hedgehog 'off' state	0	IFT88,PSMD14
Activation of anterior HOX genes in hindbrain during early embryogenesis	0	RARG
Signaling by FGFR2	0	FGFBP3
RAF/MAP kinase cascade	0	EGFR,LAMTOR3,PSMD14,PTPN3
NIK-->noncanonical NF-kB signaling	0	PSMD14
Deubiquitination	0	H2AC25,PSMD14,RIPK1,SMAD1
HDR through Homologous Recombination (HRR) or Single Strand Annealing (SSA)	0	DNA2,RAD51D
Regulation of TP53 Activity through Phosphorylation	0	DNA2
COPI-mediated anterograde transport	0	GORASP1
Intra-Golgi and retrograde Golgi-to-ER traffic	0	KIF16B,PAFAH1B3,RAB33B
Mitotic Prophase	0	GORASP1,VRK2
Mitotic Prometaphase	0	CSNK1E,TUBG2
DNA Replication Pre-Initiation	0	ANAPC11,PSMD14
S Phase	0	CCNE1,PSMD14
Cell Cycle Checkpoints	0	ANAPC11,CCNE1,DNA2,PSMD14
Glucose metabolism	0	PFKFB2
Processing of Capped Intron-Containing Pre-mRNA	0	SF3A2,ZMAT5
TNF signaling	0	RIPK1
Response to elevated platelet cytosolic Ca2+	0	CD109,VTI1B
Transcriptional regulation by RUNX1	0	CTSV,PSMD14
RUNX1 regulates megakaryocyte differentiation and platelet function	0	MOV10
Regulation of RUNX2 expression and activity	0	PSMD14
Post-translational protein phosphorylation	0	MFGE8,MGAT4A
Peroxisomal protein import	0	MLYCD
Transcriptional regulation of granulopoiesis	0	DEK
Amino acids regulate mTORC1	0	LAMTOR3
Kinesins	0	KIF16B
Ion channel transport	0	ASIC4,RIPK1,TTYH2
CGAS-STING Signaling Pathway	0	ENPP1,GJA1
Protein Sorting Signaling Pathway	0	AP1S3,LYN
TR/RXR Activation	0	PPARA,THRB
Regulation of Actin-based Motility by Rho	0	ARHGDIA,FNBP1
Role of BRCA1 in DNA Damage Response	0	E2F8
Erythropoietin Signaling Pathway	0	ITPR3,PRKCD,PRKCH
Activation of IRF by Cytosolic Pattern Recognition Receptors	0	RIPK1
Caveolar-mediated Endocytosis Signaling	0	EGFR
IL-12 Signaling and Production in Macrophages	0	NFATC4,PRKCD,PRKCH,TNFRSF11A
Role of Pattern Recognition Receptors in Recognition of Bacteria and Viruses	0	PRKCD,PRKCH,PTX3
Role of NFAT in Regulation of the Immune Response	0	CSNK1E,ITPR3,LYN,NFATC4,PPP3CB
FcŒ≥RIIB Signaling in B Lymphocytes	0	CACNB4,ITPR3,LYN
CCR5 Signaling in Macrophages	0	CACNB4,ITPR3,PRKCD,PRKCH
CD40 Signaling	0	TRAF5
Calcium-induced T Lymphocyte Apoptosis	0	ITPR3,PPP3CB,PRKCD,PRKCH
Cytotoxic T Lymphocyte-mediated Apoptosis of Target Cells	0	CASP6,CASP7
Lymphotoxin Œ≤ Receptor Signaling	0	TRAF5
IL-17 Signaling	0	MMP2,RGS16,TRAF5
Airway Pathology in Chronic Obstructive Pulmonary Disease	0	FGF11,MMP2
CTLA4 Signaling in Cytotoxic T Lymphocytes	0	AP1S3,LYN,NFATC4,PPP2R2A,PPP2R2C
IL-15 Production	0	EGFR,LYN
CD28 Signaling in T Helper Cells	0	ITPR3,NFATC4,PPP3CB
Dendritic Cell Maturation	0	CD58,LEPR
Angiopoietin Signaling	0	FOXO1
Cellular Effects of Sildenafil (Viagra)	0	CACNB4,ITPR3,NPPA
Relaxin Signaling	0	ENPP1,MPPE1
Semaphorin Signaling in Neurons	0	FNBP1
Cardiac Hypertrophy Signaling	0	CACNB4,FNBP1,MAP3K9,NFATC4,PPP3CB
ICOS-ICOSL Signaling in T Helper Cells	0	ITPR3,NFATC4,PPP3CB
HMGB1 Signaling	0	FNBP1
Maturity Onset Diabetes of Young (MODY) Signaling	0	CACNB4
ATM Signaling	0	PPP2R2A,PPP2R2C
Germ Cell-Sertoli Cell Junction Signaling	0	FNBP1,MAP3K9
CREB Signaling in Neurons	0	CACNB4,EGFR,ITPR3,OPRK1,PRKCD,PRKCH,S1PR3,TGFBR3,TNFRSF11A,TSHR
Prostate Cancer Signaling	0	CCNE1,FOXO1
Type I Diabetes Mellitus Signaling	0	RIPK1,SOCS2
Primary Immunodeficiency Signaling	0	RFXAP
Autoimmune Thyroid Disease Signaling	0	TSHR
Acute Myeloid Leukemia Signaling	0	TCF7
p70S6K Signaling	0	EGFR,LYN,PPP2R2A,PPP2R2C,PRKCD,PRKCH
ERK5 Signaling	0	EGFR
G Protein Signaling Mediated by Tubby	0	THRB
Systemic Lupus Erythematosus Signaling	0	LYN,NFATC4,ZMAT5
ILK Signaling	0	FNBP1,PPP2R2A,PPP2R2C
FAK Signaling	0	EGFR,ETS1,IL13RA1,MMP2,OPRK1,S1PR3,SOCS2,TCF7,TGFBR3,TSHR
Phospholipase C Signaling	0	ARHGEF4,FNBP1,ITPR3,LYN,NFATC4,PPP1R14A,PPP3CB,PRKCD,PRKCH
Atherosclerosis Signaling	0	ABHD3,CXCL12
Breast Cancer Regulation by Stathmin1	0	ARHGEF4,E2F8,MMP2,OPRK1,PPP1R14A,PPP1R3D,PPP2R2A,PPP2R2C,PRKCD,PRKCH,S1PR3,TSHR
Neuroprotective Role of THOP1 in Alzheimer's Disease	0	ACE
Regulation of IL-2 Expression in Activated and Anergic T Lymphocytes	0	NFATC4,PPP3CB
NUR77 Signaling in T Lymphocytes	0	PPP3CB,PRKCD,PRKCH
PKCŒ∏ Signaling in T Lymphocytes	0	CACNB4,ITPR3,MAP3K9,NFATC4,PPP3CB
Role of MAPK Signaling in the Pathogenesis of Influenza	0	ABHD3
Antiproliferative Role of TOB in T Cell Signaling	0	CCNE1
OX40 Signaling Pathway	0	TRAF5
PI3K Signaling in B Lymphocytes	0	ITPR3,LYN,NFATC4,PPP3CB
P2Y Purigenic Receptor Signaling Pathway	0	PRKCD,PRKCH
Spliceosomal Cycle	0	SF3A2
IL-17A Signaling in Fibroblasts	0	CXCL12
Actin Nucleation by ARP-WASP Complex	0	FNBP1
NGF Signaling	0	MAP3K9,PRKCD
Signaling by Rho Family GTPases	0	ARHGEF4,FNBP1,MAP3K9
RHOGDI Signaling	0	ARHGDIA,ARHGEF4,FNBP1
Sertoli Cell-Sertoli Cell Junction Signaling	0	CLDN11,EGFR,GJA1,MAP3K9
Mouse Embryonic Stem Cell Pluripotency	0	SMAD1,TCF7
ERB2-ERBB3 Signaling	0	FOXO1
GADD45 Signaling	0	CCNE1
GDNF Family Ligand-Receptor Interactions	0	ITPR3
Heparan Sulfate Biosynthesis	0	CHST15
Nicotine Degradation III	0	CYP2U1
Heparan Sulfate Biosynthesis (Late Stages)	0	CHST15
Melatonin Degradation I	0	CYP2U1
Triacylglycerol Degradation	0	MGLL
Phospholipases	0	ABHD3
Chondroitin Sulfate Biosynthesis	0	CHST15
Dermatan Sulfate Biosynthesis	0	CHST15
Dermatan Sulfate Biosynthesis (Late Stages)	0	CHST15
Nicotine Degradation II	0	CYP2U1
Chondroitin Sulfate Biosynthesis (Late Stages)	0	CHST15
Superpathway of Melatonin Degradation	0	CYP2U1
Stearate Biosynthesis I (Animals)	0	DHRS7
Oxidative Ethanol Degradation III	0	CYP2U1
Antioxidant Action of Vitamin C	0	ABHD3,GSTO2
GŒ±i Signaling	0	OPRK1,S1PR3
Granulocyte Adhesion and Diapedesis	0	CLDN11,CXCL12,MMP2
TEC Kinase Signaling	0	FNBP1,LYN,PRKCD,PRKCH
UVA-Induced MAPK Signaling	0	EGFR,PARP3
SAPK/JNK Signaling	0	MAP3K9,RIPK1
Protein Ubiquitination Pathway	0	ANAPC11,ELOB,HSPA2,PSMD14,USP53
Amyloid Processing	0	CSNK1E
FGF Signaling	0	FGF11
JAK/STAT Signaling	0	SOCS2
GABA Receptor Signaling	0	CACNB4,ITPR3
IL-4 Signaling	0	COL25A1,IL13RA1
B Cell Receptor Signaling	0	ETS1,FOXO1,INPPL1,LYN,MAP3K9,NFATC4,PPP3CB,SYNJ2
Serotonin Receptor Signaling	0	ABHD3,CACNB4,CCNE1,FNBP1,FOXO1,LYN,MMP2,PRKCD,PRKCH
Phototransduction Pathway	0	RGS9
Chemokine Signaling	0	CXCL12
Integrin Signaling	0	FNBP1
PPAR Signaling	0	PPARA
IGF-1 Signaling	0	FOXO1,SOCS2
Glutamate Receptor Signaling	0	SLC1A1
NF-Œ∫B Signaling	0	EGFR,RIPK1,TGFBR3,TIRAP,TNFRSF11A,TRAF5
VEGF Signaling	0	FOXO1
Hypoxia Signaling in the Cardiovascular System	0	NQO1
T Cell Receptor Signaling	0	NFATC4,PPP3CB,TCF7
G-Protein Coupled Receptor Signaling	0	ENPP1,FOXO1,LATS2,MAP3K9,MPPE1,NFATC4,OPRK1,PPP3CB,RGS16,S1PR3,TSHR
BMP signaling pathway	0	SMAD1
Gustation Pathway	0	CACNB4,ITPR3,P2RX4
Phagosome Formation	0	ABHD3,AP1S3,ELMO2,ITPR3,LYN,OPRK1,PRKCD,PRKCH,S1PR3,SCARA3,TSHR
Phagosome Maturation	0	CTSV,TUBG2,VTI1B
PD-1, PD-L1 cancer immunotherapy pathway	0	LATS2
Cancer Drug Resistance by Drug Efflux	0	FOXO1
Th1 and Th2 Activation Pathway	0	NFATC4,NOTCH3,TGFBR3
Th1 Pathway	0	NFATC4,NOTCH3
Th2 Pathway	0	NOTCH3,TGFBR3
Adrenomedullin signaling pathway	0	ITPR3,MMP2
Th17 Activation Pathway	0	NFATC4
SPINK1 Pancreatic Cancer Pathway	0	CPM
SPINK1 General Cancer Pathway	0	EGFR
Endocannabinoid Developing Neuron Pathway	0	MGLL
Apelin Adipocyte Signaling Pathway	0	PTGES
Apelin Cardiomyocyte Signaling Pathway	0	PRKCD,PRKCH
Apelin Endothelial Signaling Pathway	0	PRKCD,PRKCH
FAT10 Signaling Pathway	0	PSMD14
FAT10 Cancer Signaling Pathway	0	TGFBR3
T Cell Exhaustion Signaling Pathway	0	FOXO1,NFATC4,PPP2R2A,PPP2R2C,TCF7,TGFBR3
Systemic Lupus Erythematosus in T Cell Signaling Pathway	0	CASP6,CASP7,FNBP1,LEPR,PPP2R2A,PPP2R2C,PPP3CB,S1PR3
Systemic Lupus Erythematosus in B Cell Signaling Pathway	0	FOXO1,INPPL1,LYN,NFATC4,PPP3CB,PRKCD,PRKCH,SYNJ2,TRAF5
Inhibition of ARE-Mediated mRNA Degradation Pathway	0	PPP2R2A,PPP2R2C,PSMD14
Necroptosis Signaling Pathway	0	PPP3CB,RIPK1,SLC25A6
Ephrin Receptor Signaling	0	CXCL12
Role of MAPK Signaling in Promoting the Pathogenesis of Influenza	0	ABHD3
Role of MAPK Signaling in Inhibiting the Pathogenesis of Influenza	0	ABHD3
