# Supplementary material for: MYCN drives oncogenesis by cooperating with the histone methyltransferase G9a and the WDR5 adaptor to orchestrate global gene transcription
Source: PLoS Biol. 2024 Mar 28;22(3):e3002240. doi: 10.1371/journal.pbio.3002240 (PMC11003700; doi:10.1371/journal.pbio.3002240)
Supplement: S8 Table — (XLSX) [file pbio.3002240.s015.xlsx]

## Sheet: siCtrl_G9a_p-5
Table S8. G9a ChIP-seq peaks identified in siCtrl and siMYCN transfected NB cells.
PeakID (cmd=annotatePeaks.pl p-5narrowpeak/siCtrl_G9a_GST_macspeaks.txt hg19)	Chr	Start	End	Strand	Peak Score	Focus Ratio/Region Size	Annotation	Detailed Annotation	Distance to TSS	Nearest PromoterID	Entrez ID	Nearest Unigene	Nearest Refseq	Nearest Ensembl	Gene Name	Gene Alias	Gene Description	Gene Type
siCtrl_G9a_GST_peak_6562	chr8	11058923	11059604	+	962	NA	promoter-TSS (NM_173683)	promoter-TSS (NM_173683)	79	NM_173683	286046	Hs.657083	NM_173683	ENSG00000171044	XKR6	C8orf21|C8orf5|C8orf7|XRG6	XK related 6	protein-coding
siCtrl_G9a_GST_peak_5419	chr5	142784814	142785626	+	745	NA	promoter-TSS (NM_001364180)	promoter-TSS (NM_001364180)	-300	NM_001364180	2908	Hs.122926	NM_000176	ENSG00000113580	NR3C1	GCCR|GCR|GCRST|GR|GRL	nuclear receptor subfamily 3 group C member 1	protein-coding
siCtrl_G9a_GST_peak_2845	chr16	49711131	49711210	+	547	NA	intron (NM_001271620, intron 3 of 7)	G-rich|Low_complexity|Low_complexity	-12935	NM_001330533	23090	Hs.443715	NM_015069	ENSG00000102935	ZNF423	Ebfaz|JBTS19|NPHP14|OAZ|Roaz|ZFP423|Zfp104|hOAZ	zinc finger protein 423	protein-coding
siCtrl_G9a_GST_peak_4885	chr4	1708956	1709026	+	509	NA	intron (NM_001306075, intron 1 of 6)	AluSx|SINE|Alu	5055	NM_001306074	7884	Hs.298345	NM_006527	ENSG00000163950	SLBP	HBP	stem-loop binding protein	protein-coding
siCtrl_G9a_GST_peak_3429	chr19	48248121	48248825	+	459	NA	promoter-TSS (NM_015710)	promoter-TSS (NM_015710)	-330	NM_015710	29997	Hs.421907	NM_015710	ENSG00000105373	NOP53	GLTSCR2|PICT-1|PICT1	NOP53 ribosome biogenesis factor	protein-coding
siCtrl_G9a_GST_peak_7288	chrX	78455900	78455966	+	447	NA	Intergenic	L1PA7|LINE|L1	29464	NM_032553	84636	Hs.326713	NM_032553	ENSG00000147138	GPR174	FKSG79|GPCR17|LYPSR3	G protein-coupled receptor 174	protein-coding
siCtrl_G9a_GST_peak_552	chr1	143282192	143282271	+	418	NA	Intergenic	MER21B|LTR|ERVL	-79992	NR_110761	102723769	Hs.652926	NR_110761		LOC102723769	-	uncharacterized LOC102723769	ncRNA
siCtrl_G9a_GST_peak_4397	chr21	9696748	9696897	+	400	NA	Intergenic	MER21B|LTR|ERVL	-129010	NR_037421	100500862		NR_037421	ENSG00000275708	MIR3648-1	MIR3648|hsa-mir-3648-1	microRNA 3648-1	ncRNA
siCtrl_G9a_GST_peak_4971	chr4	49316169	49316247	+	380	NA	Intergenic	MER21B|LTR|ERVL	327549	NM_001286791	80157	Hs.479703	NM_025087	ENSG00000109182	CWH43	CWH43-C|PGAP2IP	cell wall biogenesis 43 C-terminal homolog	protein-coding
siCtrl_G9a_GST_peak_3452	chr2	2616900	2617383	+	379	NA	Intergenic	Intergenic	-282094	NM_001303052	23040	Hs.434418	NM_015025	ENSG00000186487	MYT1L	MRD39|NZF1|ZC2H2C2|ZC2HC4B|myT1-L	myelin transcription factor 1 like	protein-coding
siCtrl_G9a_GST_peak_6040	chr6	160521755	160521830	+	375	NA	intron (NM_000876, intron 45 of 47)	L1MEe|LINE|L1	7678	NR_003288	729603	Hs.674810	NR_003288	ENSG00000213073	LOC729603	-	calcineurin like EF-hand protein 1 pseudogene	pseudo
siCtrl_G9a_GST_peak_553	chr1	143282561	143282791	+	373	NA	Intergenic	Intergenic	-80437	NR_110761	102723769	Hs.652926	NR_110761		LOC102723769	-	uncharacterized LOC102723769	ncRNA
siCtrl_G9a_GST_peak_2535	chr15	51421711	51422670	+	368	NA	intron (NR_146310, intron 1 of 2)	MLT1J2|LTR|ERVL-MaLR	-24717	NM_207381	388121	Hs.306343	NM_207381	ENSG00000183578	TNFAIP8L3	TIPE3	TNF alpha induced protein 8 like 3	protein-coding
siCtrl_G9a_GST_peak_4459	chr21	47604382	47604630	+	348	NA	promoter-TSS (NM_032261)	promoter-TSS (NM_032261)	-133	NM_032261	84221	Hs.381214	NM_032261	ENSG00000160284	SPATC1L	C21orf56	spermatogenesis and centriole associated 1 like	protein-coding
siCtrl_G9a_GST_peak_602	chr1	161015761	161016459	+	342	NA	promoter-TSS (NM_007122)	promoter-TSS (NM_007122)	-343	NM_207005	7391	Hs.414880	NM_007122	ENSG00000158773	USF1	FCHL|FCHL1|HYPLIP1|MLTF|MLTFI|UEF|bHLHb11	upstream transcription factor 1	protein-coding
siCtrl_G9a_GST_peak_1862	chr12	75784837	75785244	+	308	NA	promoter-TSS (NM_001355032)	promoter-TSS (NM_001355032)	171	NM_001270396	144321	Hs.406728	NM_152436	ENSG00000180481	GLIPR1L2	-	GLIPR1 like 2	protein-coding
siCtrl_G9a_GST_peak_6013	chr6	152614655	152615299	+	307	NA	intron (NM_033071, intron 93 of 145)	intron (NM_033071, intron 93 of 145)	-86688	NR_120501	100505475	Hs.571203	NR_120501		SYNE1-AS1	-	SYNE1 antisense RNA 1	ncRNA
siCtrl_G9a_GST_peak_3038	chr17	49878999	49880500	+	305	NA	intron (NM_001082533, intron 4 of 9)	intron (NM_001082533, intron 4 of 9)	356325	NM_020178	56934	Hs.463466	NM_020178	ENSG00000154975	CA10	CA-RPX|CARPX|HUCEP-15	carbonic anhydrase 10	protein-coding
siCtrl_G9a_GST_peak_2841	chr16	49506380	49506758	+	303	NA	Intergenic	Intergenic	45927	NR_144553	1596	Hs.684517	NR_144553	ENSG00000260089	ADAM3B	CYRN2	ADAM metallopeptidase domain 3B (pseudogene)	pseudo
siCtrl_G9a_GST_peak_3288	chr18	19318767	19318830	+	301	NA	Intergenic	L1P2|LINE|L1	-2492	NM_020774	57534	Hs.140903	NM_020774	ENSG00000101752	MIB1	DIP-1|DIP1|LVNC7|MIB|ZZANK2|ZZZ6	mindbomb E3 ubiquitin protein ligase 1	protein-coding
siCtrl_G9a_GST_peak_4391	chr20	62728333	62728402	+	301	NA	intron (NM_001318855, intron 1 of 2)	HAL1-2a_MD|LINE|L1	4326	NM_001318855	4987	Hs.2859	NM_000913	ENSG00000125510	OPRL1	KOR-3|NOCIR|NOP|NOPr|OOR|ORL1	opioid related nociceptin receptor 1	protein-coding
siCtrl_G9a_GST_peak_433	chr1	115859702	115860191	+	301	NA	intron (NM_002506, intron 1 of 2)	intron (NM_002506, intron 1 of 2)	20911	NM_002506	4803	Hs.2561	NM_002506	ENSG00000134259	NGF	Beta-NGF|HSAN5|NGFB	nerve growth factor	protein-coding
siCtrl_G9a_GST_peak_4979	chr4	49514524	49514670	+	300	NA	Intergenic	Intergenic	525938	NM_001286791	80157	Hs.479703	NM_025087	ENSG00000109182	CWH43	CWH43-C|PGAP2IP	cell wall biogenesis 43 C-terminal homolog	protein-coding
siCtrl_G9a_GST_peak_4972	chr4	49316360	49316511	+	300	NA	Intergenic	MER21B|LTR|ERVL	327776	NM_001286791	80157	Hs.479703	NM_025087	ENSG00000109182	CWH43	CWH43-C|PGAP2IP	cell wall biogenesis 43 C-terminal homolog	protein-coding
siCtrl_G9a_GST_peak_4975	chr4	49322797	49322875	+	296	NA	Intergenic	Intergenic	334177	NM_001286791	80157	Hs.479703	NM_025087	ENSG00000109182	CWH43	CWH43-C|PGAP2IP	cell wall biogenesis 43 C-terminal homolog	protein-coding
siCtrl_G9a_GST_peak_2538	chr15	52006057	52006711	+	293	NA	intron (NM_013243, intron 11 of 11)	intron (NM_013243, intron 11 of 11)	22875	NM_001363969	256586	Hs.603629	NM_153374	ENSG00000140280	LYSMD2	-	LysM domain containing 2	protein-coding
siCtrl_G9a_GST_peak_4968	chr4	49309246	49309451	+	292	NA	Intergenic	MER21B|LTR|ERVL	320689	NM_001286791	80157	Hs.479703	NM_025087	ENSG00000109182	CWH43	CWH43-C|PGAP2IP	cell wall biogenesis 43 C-terminal homolog	protein-coding
siCtrl_G9a_GST_peak_4960	chr4	49284322	49284452	+	288	NA	Intergenic	MER5A|DNA|hAT-Charlie	295728	NM_001286791	80157	Hs.479703	NM_025087	ENSG00000109182	CWH43	CWH43-C|PGAP2IP	cell wall biogenesis 43 C-terminal homolog	protein-coding
siCtrl_G9a_GST_peak_7295	chrX	125287830	125287907	+	278	NA	Intergenic	L1PA3|LINE|L1	12404	NM_001013628	340578	Hs.181867	NM_001013628	ENSG00000198354	DCAF12L2	WDR40C	DDB1 and CUL4 associated factor 12 like 2	protein-coding
siCtrl_G9a_GST_peak_3627	chr2	38830576	38830949	+	274	NA	promoter-TSS (NM_138394)	promoter-TSS (NM_138394)	-584	NM_001142650	92906	Hs.445497	NM_138394	ENSG00000143889	HNRNPLL	HNRPLL|SRRF	heterogeneous nuclear ribonucleoprotein L like	protein-coding
siCtrl_G9a_GST_peak_3934	chr2	119625113	119625195	+	270	NA	Intergenic	L1M4b|LINE|L1	-19395	NM_001426	2019	Hs.271977	NM_001426	ENSG00000163064	EN1	-	engrailed homeobox 1	protein-coding
siCtrl_G9a_GST_peak_2913	chr17	8632910	8632974	+	264	NA	TTS (NM_001158261)	TTS (NM_001158261)	15212	NM_144681	146849	Hs.121438	NM_144681	ENSG00000161973	CCDC42	CCDC42A	coiled-coil domain containing 42	protein-coding
siCtrl_G9a_GST_peak_5625	chr6	26240677	26240752	+	263	NA	promoter-TSS (NM_003540)	promoter-TSS (NM_003540)	60	NM_003540	8361	Hs.247816	NM_003540	ENSG00000274618	HIST1H4F	H4|H4/c|H4FC	histone cluster 1 H4 family member f	protein-coding
siCtrl_G9a_GST_peak_4976	chr4	49329838	49329984	+	262	NA	Intergenic	MER5A|DNA|hAT-Charlie	341252	NM_001286791	80157	Hs.479703	NM_025087	ENSG00000109182	CWH43	CWH43-C|PGAP2IP	cell wall biogenesis 43 C-terminal homolog	protein-coding
siCtrl_G9a_GST_peak_717	chr1	196986864	196987330	+	261	NA	Intergenic	MLT1G1|LTR|ERVL-MaLR	40430	NM_030787	81494	Hs.282594	NM_030787	ENSG00000134389	CFHR5	CFHL5|CFHR5D|FHR-5|FHR5	complement factor H related 5	protein-coding
siCtrl_G9a_GST_peak_7320	chrY	10029500	10029703	+	258	NA	Intergenic	Intergenic	281194	NR_003593	100101121	Hs.522846	NR_003593	ENSG00000250204	TTTY23B	TTTY23	testis-specific transcript, Y-linked 23B	ncRNA
siCtrl_G9a_GST_peak_4967	chr4	49308834	49309037	+	258	NA	Intergenic	MER5A|DNA|hAT-Charlie	320276	NM_001286791	80157	Hs.479703	NM_025087	ENSG00000109182	CWH43	CWH43-C|PGAP2IP	cell wall biogenesis 43 C-terminal homolog	protein-coding
siCtrl_G9a_GST_peak_6533	chr7	148638591	148638677	+	256	NA	promoter-TSS (NR_001571)	promoter-TSS (NR_001571)	54	NR_001571	6090		NR_001571		RNY5	Y5|hY5	RNA, Ro60-associated Y5	ncRNA
siCtrl_G9a_GST_peak_7307	chrY	1516836	1517483	+	252	NA	intron (NM_001173473, intron 1 of 12)	intron (NM_001173473, intron 1 of 12)	4643	NM_004192	8623	Hs.533514	NM_004192	ENSG00000169093	ASMTL	ASMTLX|ASMTLY|ASTML	acetylserotonin O-methyltransferase like	protein-coding
siCtrl_G9a_GST_peak_4521	chr22	28447655	28448096	+	249	NA	intron (NM_001145418, intron 12 of 22)	intron (NM_001145418, intron 12 of 22)	-131275	NR_036169	100423034		NR_036169	ENSG00000264073	MIR3199-1	mir-3199-1	microRNA 3199-1	ncRNA
siCtrl_G9a_GST_peak_4488	chr22	18881984	18882069	+	246	NA	promoter-TSS (NR_136571)	promoter-TSS (NR_136571)	-82	NR_136571	100996432	Hs.631668	NR_136571		FAM230F	LINC01663	family with sequence similarity 230 member F	ncRNA
siCtrl_G9a_GST_peak_258	chr1	77483921	77484346	+	246	NA	intron (NM_001320274, intron 2 of 2)	MIR|SINE|MIR	-41695	NR_106978	102466995		NR_106978	ENSG00000276081	MIR7156	hsa-mir-7156	microRNA 7156	ncRNA
siCtrl_G9a_GST_peak_6548	chr7	158708091	158708199	+	242	NA	intron (NM_001350917, intron 15 of 25)	intron (NM_001350917, intron 15 of 25)	58896	NM_001350915	55112	Hs.389945	NM_018051	ENSG00000126870	WDR60	FAP163|SRPS6|SRTD8	WD repeat domain 60	protein-coding
siCtrl_G9a_GST_peak_5761	chr6	87658239	87658627	+	241	NA	intron (NM_000865, intron 1 of 1)	MLT1K|LTR|ERVL-MaLR	11187	NM_000865	3354	Hs.1611	NM_000865	ENSG00000168830	HTR1E	5-HT1E	5-hydroxytryptamine receptor 1E	protein-coding
siCtrl_G9a_GST_peak_303	chr1	91593962	91594498	+	240	NA	Intergenic	Intergenic	-106418	NM_032186	84146	Hs.173001	NM_016620	ENSG00000122482	ZNF644	BM-005|MYP21|NatF|ZEP-2	zinc finger protein 644	protein-coding
siCtrl_G9a_GST_peak_4937	chr4	42638640	42639402	+	240	NA	intron (NM_006095, intron 1 of 36)	intron (NM_006095, intron 1 of 36)	20101	NM_001105529	10396	Hs.435052	NM_006095	ENSG00000124406	ATP8A1	ATPASEII|ATPIA|ATPP2	ATPase phospholipid transporting 8A1	protein-coding
siCtrl_G9a_GST_peak_5950	chr6	133992525	133993113	+	240	NA	intron (NR_109982, intron 4 of 8)	MSTA|LTR|ERVL-MaLR	-149466	NR_027030	154089	Hs.126165	NR_027030		LINC01312	-	long intergenic non-protein coding RNA 1312	ncRNA
siCtrl_G9a_GST_peak_2179	chr13	44765694	44766083	+	240	NA	Intergenic	Intergenic	4448	NR_107046	102465876		NR_107046	ENSG00000276319	MIR8079	hsa-mir-8079	microRNA 8079	ncRNA
siCtrl_G9a_GST_peak_4526	chr22	29516025	29516417	+	239	NA	intron (NM_032045, intron 3 of 9)	GA-rich|Low_complexity|Low_complexity	47198	NM_032045	83999	Hs.229335	NM_032045	ENSG00000183762	KREMEN1	ECTD13|KREMEN|KRM1	kringle containing transmembrane protein 1	protein-coding
siCtrl_G9a_GST_peak_2153	chr13	36341217	36341967	+	237	NA	Intergenic	Intergenic	69728	NR_132115	100507114	Hs.236298	NR_132115	ENSG00000236036	LINC00445	-	long intergenic non-protein coding RNA 445	ncRNA
siCtrl_G9a_GST_peak_4396	chr21	9696379	9696519	+	235	NA	Intergenic	Intergenic	-129383	NR_037421	100500862		NR_037421	ENSG00000275708	MIR3648-1	MIR3648|hsa-mir-3648-1	microRNA 3648-1	ncRNA
siCtrl_G9a_GST_peak_5951	chr6	134019045	134019722	+	235	NA	intron (NR_109982, intron 4 of 8)	L1MC5|LINE|L1	-122902	NR_027030	154089	Hs.126165	NR_027030		LINC01312	-	long intergenic non-protein coding RNA 1312	ncRNA
siCtrl_G9a_GST_peak_66	chr1	56020067	56020785	+	235	NA	Intergenic	MIRb|SINE|MIR	329112	NR_039618	100616272		NR_039618	ENSG00000265822	MIR4422	mir-4422	microRNA 4422	ncRNA
siCtrl_G9a_GST_peak_2270	chr13	95133212	95133495	+	235	NA	intron (NM_001322185, intron 1 of 7)	MLT1D|LTR|ERVL-MaLR	-1417	NM_001129889	1638	Hs.301865	NM_001922	ENSG00000080166	DCT	TRP-2|TYRP2	dopachrome tautomerase	protein-coding
siCtrl_G9a_GST_peak_3704	chr2	49339968	49340486	+	235	NA	intron (NM_000145, intron 1 of 9)	intron (NM_000145, intron 1 of 9)	41427	NM_181446	2492	Hs.1428	NM_000145	ENSG00000170820	FSHR	FSHR1|FSHRO|LGR1|ODG1	follicle stimulating hormone receptor	protein-coding
siCtrl_G9a_GST_peak_7318	chrY	10028173	10028242	+	227	NA	Intergenic	Intergenic	279800	NR_003593	100101121	Hs.522846	NR_003593	ENSG00000250204	TTTY23B	TTTY23	testis-specific transcript, Y-linked 23B	ncRNA
siCtrl_G9a_GST_peak_908	chr1	219965728	219966382	+	226	NA	Intergenic	Intergenic	135938	NM_018713	55532	Hs.284450	NM_018713	ENSG00000196660	SLC30A10	HMDPC|HMNDYT1|ZNT10|ZNT8|ZRC1|ZnT-10	solute carrier family 30 member 10	protein-coding
siCtrl_G9a_GST_peak_2617	chr15	70617012	70617530	+	226	NA	Intergenic	MLT1K|LTR|ERVL-MaLR	180996	NR_146562	105370880		NR_146562	ENSG00000259473	LINC02205	-	long intergenic non-protein coding RNA 2205	ncRNA
siCtrl_G9a_GST_peak_1774	chr12	63114473	63115229	+	226	NA	intron (NM_020700, intron 5 of 9)	intron (NM_020700, intron 5 of 9)	117385	NR_029661	406891		NR_029661	ENSG00000199179	MIRLET7I	LET7I|MIRNLET7I|hsa-let-7i|let-7i	microRNA let-7i	ncRNA
siCtrl_G9a_GST_peak_6881	chr9	4366584	4366957	+	226	NA	Intergenic	Intergenic	-66702	NM_001042413	169792	Hs.162125	NM_152629	ENSG00000107249	GLIS3	NDH|ZNF515	GLIS family zinc finger 3	protein-coding
siCtrl_G9a_GST_peak_653	chr1	168606628	168606900	+	226	NA	Intergenic	Intergenic	60921	NM_002995	6375	Hs.546295	NM_002995	ENSG00000143184	XCL1	ATAC|LPTN|LTN|SCM-1|SCM-1a|SCM1|SCM1A|SCYC1	X-C motif chemokine ligand 1	protein-coding
siCtrl_G9a_GST_peak_3012	chr17	45216131	45216233	+	222	NA	exon (NM_001353051, exon 11 of 17)	exon (NM_001353051, exon 11 of 17)	50479	NR_148340	996	Hs.463295	NM_001256	ENSG00000004897	CDC27	ANAPC3|APC3|CDC27Hs|D0S1430E|D17S978E|H-NUC|HNUC|NUC2	cell division cycle 27	protein-coding
siCtrl_G9a_GST_peak_2622	chr15	70962450	70962892	+	221	NA	intron (NM_018003, intron 15 of 18)	MER50|LTR|ERV1	31950	NM_001008224	55075	Hs.108049	NM_018003	ENSG00000137831	UACA	NUCLING	uveal autoantigen with coiled-coil domains and ankyrin repeats	protein-coding
siCtrl_G9a_GST_peak_2917	chr17	11081312	11082108	+	221	NA	Intergenic	Intergenic	-62820	NM_207386	388336	Hs.592124	NM_175903	ENSG00000188803	SHISA6	-	shisa family member 6	protein-coding
siCtrl_G9a_GST_peak_4291	chr20	24689267	24689951	+	219	NA	Intergenic	Intergenic	239012	NR_147606	79953	Hs.124638	NM_024893	ENSG00000101463	SYNDIG1	C20orf39|DSPC2|IFITMD5|TMEM90B	synapse differentiation inducing 1	protein-coding
siCtrl_G9a_GST_peak_3949	chr2	133020068	133020203	+	219	NA	Intergenic	Intergenic	-4529	NR_027020	554226	Hs.380689	NM_001358416	ENSG00000163046	ANKRD30BL	ANKRD30BP3|NCRNA00164	ankyrin repeat domain 30B like	protein-coding
siCtrl_G9a_GST_peak_4433	chr21	36193809	36194591	+	218	NA	intron (NM_001122607, intron 4 of 4)	intron (NM_001122607, intron 4 of 4)	66796	NM_001001890	861	Hs.149261	NM_001754	ENSG00000159216	RUNX1	AML1|AML1-EVI-1|AMLCR1|CBF2alpha|CBFA2|EVI-1|PEBP2aB|PEBP2alpha	RUNX family transcription factor 1	protein-coding
siCtrl_G9a_GST_peak_4256	chr20	16635965	16636487	+	218	NA	Intergenic	Intergenic	-74445	NM_003092	6629	Hs.280378	NM_003092	ENSG00000125870	SNRPB2	Msl1|U2B''	small nuclear ribonucleoprotein polypeptide B2	protein-coding
siCtrl_G9a_GST_peak_2116	chr12	132547068	132547134	+	217	NA	exon (NM_015409, exon 47 of 53)	exon (NM_015409, exon 47 of 53)	-21727	NR_003290	347918	Hs.122115	NM_182613	ENSG00000185684	EP400P1	EP400NL	EP400 pseudogene 1	pseudo
siCtrl_G9a_GST_peak_1536	chr11	118122505	118123284	+	216	NA	intron (NR_104405, intron 1 of 4)	intron (NR_104405, intron 1 of 4)	186	NM_198275	196264	Hs.15396	NM_198275	ENSG00000160588	MPZL3	-	myelin protein zero like 3	protein-coding
siCtrl_G9a_GST_peak_751	chr1	204268624	204269955	+	215	NA	intron (NM_014935, intron 1 of 22)	intron (NM_014935, intron 1 of 22)	59768	NM_014935	22874	Hs.253146	NM_014935	ENSG00000143850	PLEKHA6	PEPP-3|PEPP3	pleckstrin homology domain containing A6	protein-coding
siCtrl_G9a_GST_peak_1848	chr12	68769331	68770292	+	213	NA	Intergenic	Intergenic	-43617	NM_001354970	56890	Hs.655702	NM_017440	ENSG00000111554	MDM1	-	Mdm1 nuclear protein	protein-coding
siCtrl_G9a_GST_peak_3178	chr17	64902435	64903050	+	213	NA	Intergenic	L2c|LINE|L2	-58081	NM_014405	27092	Hs.514423	NM_014405	ENSG00000075461	CACNG4	-	calcium voltage-gated channel auxiliary subunit gamma 4	protein-coding
siCtrl_G9a_GST_peak_669	chr1	173683618	173684128	+	212	NA	promoter-TSS (NM_014458)	promoter-TSS (NM_014458)	-247	NM_014458	27252	Hs.495035	NM_014458	ENSG00000076321	KLHL20	KHLHX|KLEIP|KLHLX	kelch like family member 20	protein-coding
siCtrl_G9a_GST_peak_2889	chr16	83030593	83030653	+	211	NA	intron (NM_001220490, intron 2 of 12)	HAL1-2a_MD|LINE|L1	-6720	NR_110937	101928417	Hs.569538	NR_110937	ENSG00000260832	LOC101928417	-	uncharacterized LOC101928417	ncRNA
siCtrl_G9a_GST_peak_5293	chr5	72048764	72049399	+	211	NA	Intergenic	MLT1F|LTR|ERVL-MaLR	-63337	NM_002270	3842	Hs.482497	NM_002270	ENSG00000083312	TNPO1	IPO2|KPNB2|MIP|MIP1|TRN	transportin 1	protein-coding
siCtrl_G9a_GST_peak_4050	chr2	182243381	182243592	+	211	NA	intron (NR_130784, intron 4 of 4)	intron (NR_130784, intron 4 of 4)	-73107	NR_039637	100616213		NR_039637	ENSG00000266705	MIR4437	mir-4437	microRNA 4437	ncRNA
siCtrl_G9a_GST_peak_5717	chr6	64934807	64935161	+	211	NA	intron (NM_001292009, intron 31 of 43)	intron (NM_001292009, intron 31 of 43)	418255	NR_157848	112935969		NR_157848		SCAT8	EYS-AS1	S-phase cancer associated transcript 8	ncRNA
siCtrl_G9a_GST_peak_5508	chr5	176018699	176018926	+	210	NA	intron (NM_017675, intron 30 of 31)	HAL1-2a_MD|LINE|L1	18345	NM_052899	114787	Hs.150549	NM_052899	ENSG00000169258	GPRIN1	GRIN1	G protein regulated inducer of neurite outgrowth 1	protein-coding
siCtrl_G9a_GST_peak_4478	chr22	18721383	18721454	+	210	NA	promoter-TSS (NR_136561)	promoter-TSS (NR_136561)	-9	NR_136561	642643		NR_136561	ENSG00000182824	FAM230E	LINC01662	family with sequence similarity 230 member E	ncRNA
siCtrl_G9a_GST_peak_554	chr1	143351403	143351495	+	210	NA	Intergenic	Intergenic	-149210	NR_110761	102723769	Hs.652926	NR_110761		LOC102723769	-	uncharacterized LOC102723769	ncRNA
siCtrl_G9a_GST_peak_6829	chr8	127190756	127190857	+	208	NA	Intergenic	Intergenic	-146934	NR_125421	101927657	Hs.552133	NR_125421	ENSG00000244791	LOC101927657	-	uncharacterized LOC101927657	ncRNA
siCtrl_G9a_GST_peak_3045	chr17	51430888	51431783	+	207	NA	Intergenic	Intergenic	368470	NM_001243552	100506650	Hs.146556	NM_001243552		C17orf112	-	chromosome 17 open reading frame 112	protein-coding
siCtrl_G9a_GST_peak_2239	chr13	77385909	77386664	+	207	NA	Intergenic	Intergenic	74254	NM_138444	115207	Hs.644125	NM_138444	ENSG00000178695	KCTD12	C13orf2|PFET1|PFETIN	potassium channel tetramerization domain containing 12	protein-coding
siCtrl_G9a_GST_peak_2314	chr14	23938177	23938556	+	206	NA	promoter-TSS (NM_015514)	promoter-TSS (NM_015514)	-546	NM_015514	25983	Hs.9043	NM_015514	ENSG00000129460	NGDN	C14orf120|CANu1|LCP5|NGD|lpd-2	neuroguidin	protein-coding
siCtrl_G9a_GST_peak_6977	chr9	69002210	69002274	+	204	NA	promoter-TSS (NR_031629)	promoter-TSS (NR_031629)	79	NR_031629	100302167		NR_031629	ENSG00000275377	MIR1299	MIRN1299|hsa-mir-1299	microRNA 1299	ncRNA
siCtrl_G9a_GST_peak_6605	chr8	27346552	27346843	+	203	NA	Intergenic	L2|LINE|L2	-1963	NM_001256482	2053	Hs.212088	NM_001979	ENSG00000120915	EPHX2	ABHD20|CEH|SEH	epoxide hydrolase 2	protein-coding
siCtrl_G9a_GST_peak_275	chr1	84944610	84945015	+	202	NA	promoter-TSS (NM_025065)	promoter-TSS (NM_025065)	-137	NM_025065	80135	Hs.481202	NM_025065	ENSG00000117133	RPF1	BXDC5	ribosome production factor 1 homolog	protein-coding
siCtrl_G9a_GST_peak_4962	chr4	49290333	49290413	+	200	NA	Intergenic	MER5A|DNA|hAT-Charlie	301714	NM_001286791	80157	Hs.479703	NM_025087	ENSG00000109182	CWH43	CWH43-C|PGAP2IP	cell wall biogenesis 43 C-terminal homolog	protein-coding
siCtrl_G9a_GST_peak_830	chr1	210820363	210820947	+	200	NA	intron (NM_018194, intron 11 of 11)	MLT1C|LTR|ERVL-MaLR	317945	NM_001170580	55733	Hs.58650	NM_018194	ENSG00000054392	HHAT	MART2|SKI1|Skn	hedgehog acyltransferase	protein-coding
siCtrl_G9a_GST_peak_1045	chr1	242590032	242590438	+	198	NA	intron (NM_001320272, intron 2 of 10)	MLT1J1|LTR|ERVL-MaLR	22535	NM_001195812	200150	Hs.672452	NM_152666	ENSG00000180287	PLD5	PLDC	phospholipase D family member 5	protein-coding
siCtrl_G9a_GST_peak_3013	chr17	45219240	45219301	+	198	NA	exon (NM_001353051, exon 10 of 17)	exon (NM_001353051, exon 10 of 17)	47391	NR_148340	996	Hs.463295	NM_001256	ENSG00000004897	CDC27	ANAPC3|APC3|CDC27Hs|D0S1430E|D17S978E|H-NUC|HNUC|NUC2	cell division cycle 27	protein-coding
siCtrl_G9a_GST_peak_4509	chr22	21680854	21681022	+	198	NA	promoter-TSS (NR_136559)	promoter-TSS (NR_136559)	-13	NR_136559	100996335	Hs.645542	NR_136559	ENSG00000206142	FAM230H	-	family with sequence similarity 230 member H	ncRNA
siCtrl_G9a_GST_peak_4615	chr3	35801645	35801952	+	197	NA	intron (NM_001267619, intron 17 of 18)	intron (NM_001267619, intron 17 of 18)	15830	NR_029824	406916		NR_029824	ENSG00000207625	MIR128-2	MIR128B|MIRN128-2|MIRN128B|mir-128-2|mir-128b	microRNA 128-2	ncRNA
siCtrl_G9a_GST_peak_1189	chr10	77266338	77266759	+	197	NA	intron (NM_001305581, intron 2 of 6)	intron (NM_001305581, intron 2 of 6)	-45668	NR_030337	693191		NR_030337	ENSG00000207583	MIR606	MIRN606|hsa-mir-606	microRNA 606	ncRNA
siCtrl_G9a_GST_peak_4900	chr4	16790643	16790903	+	197	NA	intron (NM_001290, intron 1 of 7)	intron (NM_001290, intron 1 of 7)	109495	NM_001290	9079	Hs.714330	NM_001290	ENSG00000169744	LDB2	CLIM1|LDB-2|LDB1	LIM domain binding 2	protein-coding
siCtrl_G9a_GST_peak_731	chr1	199586891	199587358	+	197	NA	Intergenic	LTR32|LTR|ERVL	-409714	NM_003822	2494	Hs.33446	NM_003822	ENSG00000116833	NR5A2	B1F|B1F2|CPF|FTF|FTZ-F1|FTZ-F1beta|LRH-1|LRH1|hB1F-2	nuclear receptor subfamily 5 group A member 2	protein-coding
siCtrl_G9a_GST_peak_4129	chr2	208283274	208283502	+	197	NA	Intergenic	Intergenic	-111298	NM_004379	1385	Hs.516646	NM_004379	ENSG00000118260	CREB1	CREB|CREB-1	cAMP responsive element binding protein 1	protein-coding
siCtrl_G9a_GST_peak_1666	chr12	28068074	28068643	+	197	NA	Intergenic	Intergenic	54551	NM_198966	5744	Hs.591159	NM_002820	ENSG00000087494	PTHLH	BDE2|HHM|PLP|PTHR|PTHRP	parathyroid hormone like hormone	protein-coding
siCtrl_G9a_GST_peak_4777	chr3	123845101	123845931	+	197	NA	intron (NM_001024660, intron 1 of 59)	LTR83|LTR|ERVL	-6260	NR_049798	100847021		NR_049798	ENSG00000266383	MIR5002	-	microRNA 5002	ncRNA
siCtrl_G9a_GST_peak_795	chr1	209396258	209396742	+	196	NA	Intergenic	Intergenic	-102301	NR_135085	105372897	Hs.116154	NR_135085	ENSG00000227940	LINC01696	-	long intergenic non-protein coding RNA 1696	ncRNA
siCtrl_G9a_GST_peak_3581	chr2	29970825	29971266	+	196	NA	intron (NM_004304, intron 1 of 28)	intron (NM_004304, intron 1 of 28)	173407	NM_004304	238	Hs.654469	NM_004304	ENSG00000171094	ALK	CD246|NBLST3	ALK receptor tyrosine kinase	protein-coding
siCtrl_G9a_GST_peak_3795	chr2	68921206	68921529	+	196	NA	Intergenic	Intergenic	-40576	NM_001007231	9938	Hs.531807	NM_014882	ENSG00000163219	ARHGAP25	HEL-S-308|KAIA0053	Rho GTPase activating protein 25	protein-coding
siCtrl_G9a_GST_peak_4966	chr4	49302540	49302746	+	195	NA	Intergenic	MER5A|DNA|hAT-Charlie	313984	NM_001286791	80157	Hs.479703	NM_025087	ENSG00000109182	CWH43	CWH43-C|PGAP2IP	cell wall biogenesis 43 C-terminal homolog	protein-coding
siCtrl_G9a_GST_peak_1024	chr1	237911535	237911913	+	194	NA	intron (NM_001035, intron 80 of 104)	LTR16D|LTR|ERVL	-113751	NR_027247	100130331	Hs.661736	NR_027247	ENSG00000237250	LOC100130331	-	POTE ankyrin domain family, member F pseudogene	pseudo
siCtrl_G9a_GST_peak_7097	chr9	110880217	110881042	+	194	NA	Intergenic	Intergenic	-628579	NM_004235	9314	Hs.376206	NM_004235	ENSG00000136826	KLF4	EZF|GKLF	Kruppel like factor 4	protein-coding
siCtrl_G9a_GST_peak_152	chr1	61353879	61354302	+	193	NA	Intergenic	Intergenic	-62834	NR_110628	101926964	Hs.650459	NR_110628	ENSG00000231252	LOC101926964	-	uncharacterized LOC101926964	ncRNA
siCtrl_G9a_GST_peak_1434	chr11	64794951	64795417	+	193	NA	intron (NM_013306, intron 1 of 7)	CpG	273	NM_013306	29907	Hs.80132	NM_013306	ENSG00000110025	SNX15	HSAF001435	sorting nexin 15	protein-coding
siCtrl_G9a_GST_peak_7120	chr9	120378759	120379355	+	192	NA	Intergenic	Intergenic	-31827	NR_109806	101928797	Hs.382317	NR_109806	ENSG00000233569	LOC101928797	-	uncharacterized LOC101928797	ncRNA
siCtrl_G9a_GST_peak_3080	chr17	53709734	53710158	+	192	NA	Intergenic	Intergenic	90279	NM_018286	55273	Hs.173233	NM_018286	ENSG00000166292	TMEM100	-	transmembrane protein 100	protein-coding
siCtrl_G9a_GST_peak_5218	chr5	31918899	31918979	+	191	NA	intron (NM_178140, intron 2 of 24)	intron (NM_178140, intron 2 of 24)	17326	NR_036241	100422874		NR_036241	ENSG00000266243	MIR4279	-	microRNA 4279	ncRNA
siCtrl_G9a_GST_peak_4495	chr22	20656822	20656993	+	190	NA	promoter-TSS (NR_136569)	promoter-TSS (NR_136569)	-79	NR_136569	729461	Hs.629498	NM_201401	ENSG00000274044	FAM230J	LINC01660	family with sequence similarity 230 member J	ncRNA
siCtrl_G9a_GST_peak_6601	chr8	26577398	26577761	+	189	NA	Intergenic	Intergenic	141658	NM_001244604	1808	Hs.593187	NM_001386	ENSG00000092964	DPYSL2	CRMP-2|CRMP2|DHPRP2|DRP-2|DRP2|N2A3|ULIP-2|ULIP2	dihydropyrimidinase like 2	protein-coding
siCtrl_G9a_GST_peak_905	chr1	219931040	219931639	+	189	NA	Intergenic	Intergenic	-144852	NM_001355457	643136	Hs.647764	NM_001085394	ENSG00000215817	ZC3H11B	ZC3HDC11B	zinc finger CCCH-type containing 11B	protein-coding
siCtrl_G9a_GST_peak_4342	chr20	46668989	46669325	+	187	NA	Intergenic	MLT1E1A|LTR|ERVL-MaLR	-50296	NR_110027	101927457	Hs.445823	NR_110027		LINC01522	-	long intergenic non-protein coding RNA 1522	ncRNA
siCtrl_G9a_GST_peak_2482	chr15	45840961	45841307	+	187	NA	intron (NR_022014, intron 5 of 5)	LTR9|LTR|ERV1	11685	NR_145777	109617005		NR_145777	ENSG00000207516	SNORA41B	-	small nucleolar RNA, H/ACA box 41B	snoRNA
siCtrl_G9a_GST_peak_1309	chr10	130262631	130262869	+	187	NA	Intergenic	CT-rich|Low_complexity|Low_complexity	178536	NR_120619	101927381	Hs.523342	NR_120619	ENSG00000280953	LINC01163	TCONS_00017722	long intergenic non-protein coding RNA 1163	ncRNA
siCtrl_G9a_GST_peak_837	chr1	210895778	210895980	+	187	NA	intron (NM_002238, intron 10 of 10)	intron (NM_002238, intron 10 of 10)	393169	NM_001170580	55733	Hs.58650	NM_018194	ENSG00000054392	HHAT	MART2|SKI1|Skn	hedgehog acyltransferase	protein-coding
siCtrl_G9a_GST_peak_3165	chr17	63181269	63182143	+	186	NA	intron (NM_003835, intron 9 of 18)	intron (NM_003835, intron 9 of 18)	48218	NM_003835	8787	Hs.664380	NM_003835	ENSG00000108370	RGS9	PERRS|RGS9L	regulator of G protein signaling 9	protein-coding
siCtrl_G9a_GST_peak_2674	chr15	86736399	86737438	+	186	NA	intron (NM_152336, intron 5 of 24)	intron (NM_152336, intron 5 of 24)	-76970	NR_120368	101929701	Hs.132570	NR_120368	ENSG00000260477	LINC01584	-	long intergenic non-protein coding RNA 1584	ncRNA
siCtrl_G9a_GST_peak_3391	chr19	381199	381386	+	185	NA	Intergenic	Intergenic	-5266	NM_016585	51298	Hs.250002	NM_016585	ENSG00000105549	THEG	CT56|THEG1	theg spermatid protein	protein-coding
siCtrl_G9a_GST_peak_3078	chr17	53644643	53645516	+	184	NA	Intergenic	Intergenic	-145883	NM_012329	23531	Hs.463483	NM_012329	ENSG00000108960	MMD	MMA|MMD1|PAQR11	monocyte to macrophage differentiation associated	protein-coding
siCtrl_G9a_GST_peak_396	chr1	108555429	108555966	+	184	NA	Intergenic	MLT2B3|LTR|ERVL	-47895	NM_006113	10451	Hs.267659	NM_006113	ENSG00000134215	VAV3	-	vav guanine nucleotide exchange factor 3	protein-coding
siCtrl_G9a_GST_peak_2397	chr14	89452006	89452331	+	184	NA	Intergenic	Intergenic	161173	NR_159362	123016	Hs.303055	NM_144596	ENSG00000165533	TTC8	BBS8|RP51	tetratricopeptide repeat domain 8	protein-coding
siCtrl_G9a_GST_peak_4991	chr4	52972914	52973130	+	183	NA	Intergenic	Intergenic	55552	NM_145263	132671	Hs.527090	NM_145263	ENSG00000163071	SPATA18	Mieap|SPETEX1	spermatogenesis associated 18	protein-coding
siCtrl_G9a_GST_peak_2304	chr14	19658010	19658301	+	183	NA	intron (NR_122112, intron 6 of 7)	intron (NR_122112, intron 6 of 7)	8118	NR_122112	503638	Hs.474095	NR_122111		DUXAP9	LINC01296	double homeobox A pseudogene 9	pseudo
siCtrl_G9a_GST_peak_1516	chr11	112482194	112482490	+	183	NA	Intergenic	Intergenic	-55817	NR_104155	387810	Hs.512255	NR_104155	ENSG00000255484	LINC02764	-	long intergenic non-protein coding RNA 2764	ncRNA
siCtrl_G9a_GST_peak_6638	chr8	40376144	40376348	+	183	NA	Intergenic	Intergenic	-175364	NR_156738	112543493		NR_156738		SIRLNT	lncRNA-PRLB	SIRT1 regulating lncRNA tumor promoter	ncRNA
siCtrl_G9a_GST_peak_6327	chr7	69302543	69302637	+	183	NA	intron (NM_001127232, intron 1 of 4)	intron (NM_001127232, intron 1 of 4)	239129	NM_001127231	26053	Hs.21631	NM_015570	ENSG00000158321	AUTS2	FBRSL2|MRD26	activator of transcription and developmental regulator AUTS2	protein-coding
siCtrl_G9a_GST_peak_3086	chr17	53769087	53769382	+	183	NA	Intergenic	Intergenic	30991	NM_018286	55273	Hs.173233	NM_018286	ENSG00000166292	TMEM100	-	transmembrane protein 100	protein-coding
siCtrl_G9a_GST_peak_6474	chr7	133543452	133543993	+	183	NA	intron (NM_021807, intron 11 of 17)	intron (NM_021807, intron 11 of 17)	-34081	NR_120513	101928861	Hs.675747	NR_120513		LOC101928861	-	uncharacterized LOC101928861	ncRNA
siCtrl_G9a_GST_peak_1090	chr10	18412193	18412293	+	182	NA	Intergenic	MER66C|LTR|ERV1	-17110	NM_201572	783	Hs.59093	NM_000724	ENSG00000165995	CACNB2	CACNLB2|CAVB2|MYSB	calcium voltage-gated channel auxiliary subunit beta 2	protein-coding
siCtrl_G9a_GST_peak_5631	chr6	28129506	28129854	+	182	NA	intron (NR_103448, intron 1 of 4)	intron (NR_103448, intron 1 of 4)	141	NR_103448	651302	Hs.172143	NM_001145129	ENSG00000226314	ZNF192P1	ZNF389|ZNF389P|dJ265C24.4	zinc finger protein 192 pseudogene 1	pseudo
siCtrl_G9a_GST_peak_3439	chr19	58010913	58010974	+	182	NA	promoter-TSS (NM_001304337)	promoter-TSS (NM_001304337)	-279	NM_001304336	374928	Hs.579576	NM_198542	ENSG00000152439	ZNF773	ZNF419B	zinc finger protein 773	protein-coding
siCtrl_G9a_GST_peak_3613	chr2	38346693	38347120	+	182	NA	Intergenic	Intergenic	-11341	NR_027252	285154	Hs.353894	NM_173652	ENSG00000232973	CYP1B1-AS1	C2orf58	CYP1B1 antisense RNA 1	ncRNA
siCtrl_G9a_GST_peak_633	chr1	165924271	165924424	+	182	NA	Intergenic	Intergenic	47189	NR_037431	100500832		NR_037431	ENSG00000283936	MIR3658	-	microRNA 3658	ncRNA
siCtrl_G9a_GST_peak_3326	chr18	43169555	43170090	+	181	NA	intron (NM_001242692, intron 2 of 20)	intron (NM_001242692, intron 2 of 20)	-25619	NM_007163	8170	Hs.710927	NM_007163	ENSG00000132874	SLC14A2	HUT2|UT-A2|UT2|UTA|UTR|hUT-A6	solute carrier family 14 member 2	protein-coding
siCtrl_G9a_GST_peak_4974	chr4	49322381	49322595	+	181	NA	Intergenic	MER21B|LTR|ERVL	333829	NM_001286791	80157	Hs.479703	NM_025087	ENSG00000109182	CWH43	CWH43-C|PGAP2IP	cell wall biogenesis 43 C-terminal homolog	protein-coding
siCtrl_G9a_GST_peak_985	chr1	232174565	232174847	+	181	NA	non-coding (NR_028393, exon 16 of 16)	non-coding (NR_028393, exon 16 of 16)	113126	NR_126441	104472714		NR_126441	ENSG00000226758	DISC1-IT1	-	DISC1 intronic transcript 1	ncRNA
siCtrl_G9a_GST_peak_2325	chr14	38424622	38424683	+	181	NA	Intergenic	L1PA3|LINE|L1	-53323	NR_135286	400208	Hs.660501	NR_135286	ENSG00000259091	LINC00517	C14orf26	long intergenic non-protein coding RNA 517	ncRNA
siCtrl_G9a_GST_peak_4056	chr2	183683650	183684058	+	181	NA	Intergenic	Intergenic	47511	NM_001463	2487	Hs.128453	NM_001463	ENSG00000162998	FRZB	FRE|FRITZ|FRP-3|FRZB-1|FRZB-PEN|FRZB1|FZRB|OS1|SFRP3|SRFP3|hFIZ	frizzled related protein	protein-coding
siCtrl_G9a_GST_peak_586	chr1	151431897	151432583	+	181	NA	promoter-TSS (NM_001194937)	promoter-TSS (NM_001194937)	-270	NM_001194937	23126	Hs.489873	NM_015100	ENSG00000143442	POGZ	MRD37|WHSUS|ZNF280E|ZNF635|ZNF635m	pogo transposable element derived with ZNF domain	protein-coding
siCtrl_G9a_GST_peak_2995	chr17	38975057	38975734	+	181	NA	promoter-TSS (NR_160888)	promoter-TSS (NR_160888)	-2	NR_160887	147184	Hs.353163	NM_145274	ENSG00000167920	TMEM99	-	transmembrane protein 99 (putative)	ncRNA
siCtrl_G9a_GST_peak_3521	chr2	18301371	18301793	+	180	NA	Intergenic	Intergenic	241648	NM_002252	3790	Hs.414489	NM_002252	ENSG00000170745	KCNS3	KV9.3	potassium voltage-gated channel modifier subfamily S member 3	protein-coding
siCtrl_G9a_GST_peak_1635	chr12	23236719	23237228	+	180	NA	Intergenic	MLT2A2|LTR|ERVL	-91597	NR_120471	101928441	Hs.129111	NR_120471	ENSG00000256321	LOC101928441	-	uncharacterized LOC101928441	ncRNA
siCtrl_G9a_GST_peak_4321	chr20	38258948	38259058	+	180	NA	Intergenic	Intergenic	-374100	NR_109936	100505663	Hs.559348	NR_109936	ENSG00000237767	LINC01370	HI-LNC25|HILNC25	long intergenic non-protein coding RNA 1370	ncRNA
siCtrl_G9a_GST_peak_1855	chr12	71956456	71956674	+	180	NA	intron (NR_110596, intron 8 of 19)	intron (NR_110596, intron 8 of 19)	101063	NM_144982	196441	Hs.245798	NM_144982	ENSG00000133858	ZFC3H1	CCDC131|CSRC2|PSRC2	zinc finger C3H1-type containing	protein-coding
siCtrl_G9a_GST_peak_3575	chr2	29955809	29956463	+	180	NA	intron (NM_004304, intron 1 of 28)	intron (NM_004304, intron 1 of 28)	188316	NM_004304	238	Hs.654469	NM_004304	ENSG00000171094	ALK	CD246|NBLST3	ALK receptor tyrosine kinase	protein-coding
siCtrl_G9a_GST_peak_990	chr1	232528890	232529407	+	180	NA	Intergenic	Intergenic	122206	NM_020808	57568	Hs.745009	NM_020808	ENSG00000116991	SIPA1L2	SPAL2|SPAR2	signal induced proliferation associated 1 like 2	protein-coding
siCtrl_G9a_GST_peak_4030	chr2	174719744	174719905	+	180	NA	Intergenic	Intergenic	108784	NM_001017371	6670	Hs.531587	NM_003111	ENSG00000172845	SP3	SPR2	Sp3 transcription factor	protein-coding
siCtrl_G9a_GST_peak_6903	chr9	16153313	16153426	+	180	NA	Intergenic	Intergenic	99736	NM_001271829	100129385	Hs.586441	NM_001271829	ENSG00000205549	C9orf92	Em:AL513424.1	chromosome 9 open reading frame 92	protein-coding
siCtrl_G9a_GST_peak_5910	chr6	120600957	120601191	+	180	NA	Intergenic	Intergenic	264749	NR_036098	100422951		NR_036098	ENSG00000265725	MIR3144	mir-3144	microRNA 3144	ncRNA
siCtrl_G9a_GST_peak_693	chr1	183213644	183213971	+	179	NA	3' UTR (NM_005562, exon 23 of 23)	3' UTR (NM_005562, exon 23 of 23)	58408	NM_005562	3918	Hs.591484	NM_005562	ENSG00000058085	LAMC2	B2T|BM600|CSF|EBR2|EBR2A|LAMB2T|LAMNB2	laminin subunit gamma 2	protein-coding
siCtrl_G9a_GST_peak_4607	chr3	25802353	25802412	+	179	NA	intron (NM_001145295, intron 3 of 10)	AluSp|SINE|Alu	22552	NM_018297	55768	Hs.368960	NM_018297	ENSG00000151092	NGLY1	CDDG|CDG1V|PNG1|PNGase	N-glycanase 1	protein-coding
siCtrl_G9a_GST_peak_2216	chr13	53643217	53643377	+	179	NA	Intergenic	Intergenic	40349	NM_006418	10562	Hs.508113	NM_006418	ENSG00000102837	OLFM4	GC1|GW112|OLM4|OlfD|UNQ362|bA209J19.1|hGC-1|hOLfD	olfactomedin 4	protein-coding
siCtrl_G9a_GST_peak_6218	chr7	36085749	36086228	+	179	NA	Intergenic	Intergenic	-48932	NR_108089	101928618	Hs.561704	NR_108089	ENSG00000261184	LOC101928618	-	uncharacterized LOC101928618	ncRNA
siCtrl_G9a_GST_peak_6401	chr7	106301636	106302129	+	177	NA	promoter-TSS (NM_175884)	promoter-TSS (NM_175884)	-278	NM_175884	168455	Hs.29692	NM_175884	ENSG00000253276	CCDC71L	C7orf74	coiled-coil domain containing 71 like	protein-coding
siCtrl_G9a_GST_peak_687	chr1	180769939	180770502	+	177	NA	intron (NR_137330, intron 3 of 12)	ERVL-E-int|LTR|ERVL	-111813	NM_020950	57710	Hs.734816	NM_020950	ENSG00000135835	KIAA1614	-	KIAA1614	protein-coding
siCtrl_G9a_GST_peak_2410	chr14	96230640	96231053	+	175	NA	Intergenic	Intergenic	49026	NR_148060	107984703	Hs.633538	NR_148060		LOC107984703	-	uncharacterized LOC107984703	ncRNA
siCtrl_G9a_GST_peak_5637	chr6	37286910	37287262	+	174	NA	intron (NR_130108, intron 12 of 12)	intron (NR_130108, intron 12 of 12)	-34673	NM_003958	9025	Hs.485278	NM_003958	ENSG00000112130	RNF8	hRNF8	ring finger protein 8	protein-coding
siCtrl_G9a_GST_peak_3857	chr2	85944928	85945500	+	174	NA	Intergenic	Intergenic	23733	NM_001302758	10578	Hs.105806	NM_006433	ENSG00000115523	GNLY	D2S69E|LAG-2|LAG2|NKG5|TLA519	granulysin	protein-coding
siCtrl_G9a_GST_peak_3524	chr2	18426727	18426967	+	174	NA	Intergenic	Intergenic	315072	NM_020905	57665	Hs.120319	NM_020905	ENSG00000240857	RDH14	PAN2|SDR7C4	retinol dehydrogenase 14	protein-coding
siCtrl_G9a_GST_peak_3172	chr17	64393859	64394500	+	174	NA	TTS (NR_110822)	TTS (NR_110822)	18793	NR_110822	101928001	Hs.650730	NR_110822		PRKCA-AS1	-	PRKCA antisense RNA 1	ncRNA
siCtrl_G9a_GST_peak_4185	chr2	231870202	231870376	+	173	NA	intron (NM_139073, intron 4 of 4)	HAL1-2a_MD|LINE|L1	9450	NM_139073	130560	Hs.745178	NM_139073	ENSG00000173699	SPATA3	TSARG1	spermatogenesis associated 3	protein-coding
siCtrl_G9a_GST_peak_263	chr1	77841906	77842059	+	173	NA	intron (NM_012093, intron 6 of 13)	intron (NM_012093, intron 6 of 13)	93210	NM_012093	26289	Hs.559718	NM_012093	ENSG00000154027	AK5	AK6	adenylate kinase 5	protein-coding
siCtrl_G9a_GST_peak_2766	chr15	101874402	101874655	+	172	NA	promoter-TSS (NR_132373)	promoter-TSS (NR_132373)	-114	NR_132373	105371027		NR_132373	ENSG00000259764	PCSK6-AS1	-	PCSK6 antisense RNA 1	ncRNA
siCtrl_G9a_GST_peak_2828	chr16	28223421	28223926	+	172	NA	promoter-TSS (NM_015171)	promoter-TSS (NM_015171)	-387	NM_015171	23214	Hs.460468	NM_015171	ENSG00000169180	XPO6	EXP6|RANBP20	exportin 6	protein-coding
siCtrl_G9a_GST_peak_2923	chr17	11399190	11399701	+	172	NA	intron (NM_001173462, intron 3 of 4)	intron (NM_001173462, intron 3 of 4)	-102342	NM_001372	1770	Hs.567259	NM_001372	ENSG00000007174	DNAH9	CILD40|DNAH17L|DNEL1|DYH9|Dnahc9|HL-20|HL20	dynein axonemal heavy chain 9	protein-coding
siCtrl_G9a_GST_peak_2416	chr14	97220618	97220910	+	171	NA	intron (NR_146552, intron 3 of 3)	MLT1J2|LTR|ERVL-MaLR	13236	NR_146552	105370646		NR_146552	ENSG00000258979	LINC02299	-	long intergenic non-protein coding RNA 2299	ncRNA
siCtrl_G9a_GST_peak_4633	chr3	39591271	39591472	+	170	NA	Intergenic	Intergenic	47814	NM_001278323	4336	Hs.121333	NM_182935	ENSG00000168314	MOBP	-	myelin associated oligodendrocyte basic protein	protein-coding
siCtrl_G9a_GST_peak_3058	chr17	52861803	52861947	+	170	NA	Intergenic	Intergenic	-116177	NM_001321175	10040	Hs.153504	NM_005486	ENSG00000141198	TOM1L1	SRCASM	target of myb1 like 1 membrane trafficking protein	protein-coding
siCtrl_G9a_GST_peak_2894	chr16	87840204	87840544	+	170	NA	Intergenic	Intergenic	-27620	NR_120309	102724467	Hs.587857	NR_120309		LOC102724467	-	uncharacterized LOC102724467	ncRNA
siCtrl_G9a_GST_peak_1299	chr10	125014510	125014673	+	170	NA	Intergenic	HAL1-2a_MD|LINE|L1	100673	NM_004725	9184	Hs.418533	NM_004725	ENSG00000154473	BUB3	BUB3L|hBUB3	BUB3 mitotic checkpoint protein	protein-coding
siCtrl_G9a_GST_peak_2592	chr15	67184771	67184917	+	170	NA	Intergenic	HUERS-P1-int|LTR|ERV1	64009	NR_135687	102723481	Hs.512978	NR_135687	ENSG00000259289	LINC02206	-	long intergenic non-protein coding RNA 2206	ncRNA
siCtrl_G9a_GST_peak_4729	chr3	100122294	100122450	+	170	NA	intron (NM_001085451, intron 1 of 3)	AluSq2|SINE|Alu	1989	NM_001085451	348801	Hs.591294	NM_001085451	ENSG00000206535	LNP1	NP3	leukemia NUP98 fusion partner 1	protein-coding
siCtrl_G9a_GST_peak_5756	chr6	86090658	86090729	+	170	NA	Intergenic	L1PA8|LINE|L1	9211	NR_134634	101928820	Hs.587370	NR_134633	ENSG00000234155	LINC02535	-	long intergenic non-protein coding RNA 2535	ncRNA
siCtrl_G9a_GST_peak_1038	chr1	240348262	240348441	+	170	NA	intron (NM_001305424, intron 4 of 18)	CT-rich|Low_complexity|Low_complexity	93168	NM_020066	56776	Hs.24889	NM_020066	ENSG00000155816	FMN2	-	formin 2	protein-coding
siCtrl_G9a_GST_peak_2927	chr17	12166725	12166784	+	169	NA	Intergenic	L1PA4|LINE|L1	181538	NR_030613	100126313		NR_030613	ENSG00000266297	MIR744	MIRN744|hsa-mir-744|mir-744	microRNA 744	ncRNA
siCtrl_G9a_GST_peak_5220	chr5	33410076	33410292	+	169	NA	Intergenic	Intergenic	-30618	NM_001258437	6897	Hs.481860	NM_152295	ENSG00000113407	TARS	ThrRS	threonyl-tRNA synthetase	protein-coding
siCtrl_G9a_GST_peak_3017	chr17	45282604	45282945	+	169	NA	Intergenic	Intergenic	-3654	NM_001002841	4635	Hs.463300	NM_002476	ENSG00000198336	MYL4	ALC1|AMLC|GT1|PRO1957	myosin light chain 4	protein-coding
siCtrl_G9a_GST_peak_1896	chr12	83069089	83069544	+	169	NA	Intergenic	Intergenic	-11369	NM_152588	160335	Hs.577775	NM_152588	ENSG00000179104	TMTC2	IBDBP1	transmembrane O-mannosyltransferase targeting cadherins 2	protein-coding
siCtrl_G9a_GST_peak_6153	chr7	28201011	28201311	+	169	NA	intron (NM_175061, intron 1 of 4)	intron (NM_175061, intron 1 of 4)	-18915	NR_034097	100128081	Hs.434307	NR_034097		JAZF1-AS1	-	JAZF1 antisense RNA 1	ncRNA
siCtrl_G9a_GST_peak_5782	chr6	91605944	91606291	+	169	NA	Intergenic	Intergenic	-309326	NM_003188	6885	Hs.594838	NM_003188	ENSG00000135341	MAP3K7	CSCF|FMD2|MEKK7|TAK1|TGF1a	mitogen-activated protein kinase kinase kinase 7	protein-coding
siCtrl_G9a_GST_peak_1720	chr12	43312035	43312374	+	169	NA	Intergenic	Intergenic	226186	NR_135028	105369739	Hs.126660	NR_135028	ENSG00000257114	LINC02450	-	long intergenic non-protein coding RNA 2450	ncRNA
siCtrl_G9a_GST_peak_1224	chr10	86705407	86705696	+	169	NA	Intergenic	Intergenic	253110	NR_120668	101929624	Hs.588831	NR_120667	ENSG00000237267	LINC01519	-	long intergenic non-protein coding RNA 1519	ncRNA
siCtrl_G9a_GST_peak_1637	chr12	23341006	23341352	+	169	NA	non-coding (NR_120471, exon 3 of 5)	non-coding (NR_120471, exon 3 of 5)	12609	NR_120471	101928441	Hs.129111	NR_120471	ENSG00000256321	LOC101928441	-	uncharacterized LOC101928441	ncRNA
siCtrl_G9a_GST_peak_4098	chr2	205725079	205725271	+	169	NA	intron (NM_205863, intron 2 of 21)	intron (NM_205863, intron 2 of 21)	314977	NM_057177	117583	Hs.657382	NM_057177	ENSG00000116117	PARD3B	ALS2CR19|PAR3B|PAR3L|PAR3beta	par-3 family cell polarity regulator beta	protein-coding
siCtrl_G9a_GST_peak_3422	chr19	34158969	34159541	+	169	NA	intron (NM_001127895, intron 2 of 4)	intron (NM_001127895, intron 2 of 4)	-16179	NM_022467	64377	Hs.165724	NM_022467	ENSG00000124302	CHST8	GALNAC4ST1|GalNAc4ST|PSS3	carbohydrate sulfotransferase 8	protein-coding
siCtrl_G9a_GST_peak_6549	chr7	158708473	158708616	+	169	NA	intron (NM_001350917, intron 15 of 25)	intron (NM_001350917, intron 15 of 25)	59295	NM_001350915	55112	Hs.389945	NM_018051	ENSG00000126870	WDR60	FAP163|SRPS6|SRTD8	WD repeat domain 60	protein-coding
siCtrl_G9a_GST_peak_6797	chr8	117778023	117778232	+	169	NA	promoter-TSS (NM_032334)	promoter-TSS (NM_032334)	-636	NM_032334	84294	Hs.86970	NM_032334	ENSG00000147679	UTP23	C8orf53	UTP23 small subunit processome component	protein-coding
siCtrl_G9a_GST_peak_7306	chrY	1516245	1516724	+	169	NA	intron (NM_001173473, intron 1 of 12)	intron (NM_001173473, intron 1 of 12)	5318	NM_004192	8623	Hs.533514	NM_004192	ENSG00000169093	ASMTL	ASMTLX|ASMTLY|ASTML	acetylserotonin O-methyltransferase like	protein-coding
siCtrl_G9a_GST_peak_5788	chr6	92491816	92492434	+	169	NA	Intergenic	Intergenic	-91979	NR_104154	101929083	Hs.586238	NR_104154		CASC6	-	cancer susceptibility 6	ncRNA
siCtrl_G9a_GST_peak_4060	chr2	184715533	184715592	+	169	NA	Intergenic	L1PA3|LINE|L1	-528140	NR_039638	100616305		NR_039638	ENSG00000266808	MIR548AE1	-	microRNA 548ae-1	ncRNA
siCtrl_G9a_GST_peak_341	chr1	95872703	95873321	+	169	NA	Intergenic	Intergenic	-55349	NR_146486	101928169		NR_146486		LINC01650	-	long intergenic non-protein coding RNA 1650	ncRNA
siCtrl_G9a_GST_peak_2778	chr16	6096958	6097164	+	169	NA	intron (NM_018723, intron 1 of 15)	intron (NM_018723, intron 1 of 15)	27357	NM_001308117	54715	Hs.459842	NM_018723	ENSG00000078328	RBFOX1	2BP1|A2BP1|FOX-1|FOX1|HRNBP1	RNA binding fox-1 homolog 1	protein-coding
siCtrl_G9a_GST_peak_3314	chr18	40154875	40155094	+	169	NA	non-coding (NR_046174, exon 7 of 10)	non-coding (NR_046174, exon 7 of 10)	388351	NR_046458	284260	Hs.652819	NR_046174	ENSG00000267586	LINC00907	-	long intergenic non-protein coding RNA 907	ncRNA
siCtrl_G9a_GST_peak_573	chr1	146104995	146105268	+	169	NA	intron (NM_001351365, intron 87 of 94)	MLT1H1|LTR|ERVL-MaLR	11974	NR_135559	100505824	Hs.488388	NR_135559	ENSG00000232265	LINC02805	-	long intergenic non-protein coding RNA 2805	ncRNA
siCtrl_G9a_GST_peak_7079	chr9	103820229	103820745	+	169	NA	intron (NM_207299, intron 1 of 7)	LTR88b|LTR|Gypsy?	29478	NM_207299	54886	Hs.382683	NM_017753	ENSG00000148123	PLPPR1	LPPR1|PRG-3	phospholipid phosphatase related 1	protein-coding
siCtrl_G9a_GST_peak_180	chr1	64169365	64169727	+	169	NA	Intergenic	Intergenic	-70142	NM_005012	4919	Hs.128753	NM_005012	ENSG00000185483	ROR1	NTRKR1|dJ537F10.1	receptor tyrosine kinase like orphan receptor 1	protein-coding
siCtrl_G9a_GST_peak_5060	chr4	106482599	106482682	+	169	NA	promoter-TSS (NR_046840)	promoter-TSS (NR_046840)	-108	NR_046840	100874374	Hs.668908	NR_046840	ENSG00000249885	ARHGEF38-IT1	-	ARHGEF38 intronic transcript 1	ncRNA
siCtrl_G9a_GST_peak_1221	chr10	86578839	86578910	+	168	NA	Intergenic	L1PA15|LINE|L1	379787	NR_120668	101929624	Hs.588831	NR_120667	ENSG00000237267	LINC01519	-	long intergenic non-protein coding RNA 1519	ncRNA
siCtrl_G9a_GST_peak_2425	chr15	20117635	20117701	+	168	NA	Intergenic	Intergenic	-370329	NR_038836	646096	Hs.448789	NR_038836	ENSG00000259156	CHEK2P2	-	checkpoint kinase 2 pseudogene 2	pseudo
siCtrl_G9a_GST_peak_2708	chr15	89089933	89090175	+	168	NA	promoter-TSS (NR_135742)	promoter-TSS (NR_135742)	-120	NM_017996	55070	Hs.655064	NM_017996	ENSG00000140543	DET1	-	DET1 partner of COP1 E3 ubiquitin ligase	protein-coding
siCtrl_G9a_GST_peak_3436	chr19	56764131	56764452	+	168	NA	intron (NM_001322061, intron 2 of 6)	intron (NM_001322061, intron 2 of 6)	-19826	NM_001354658	100506374	Hs.631532	NM_001354658	ENSG00000267710	EDDM13	-	epididymal protein 13	protein-coding
siCtrl_G9a_GST_peak_4500	chr22	21520430	21520592	+	168	NA	promoter-TSS (NR_108107)	promoter-TSS (NR_108107)	-681	NR_108107	642633		NM_201565	ENSG00000215498	FAM230B	-	family with sequence similarity 230 member B	ncRNA
siCtrl_G9a_GST_peak_551	chr1	143281705	143281863	+	168	NA	Intergenic	L1PA10|LINE|L1	-79545	NR_110761	102723769	Hs.652926	NR_110761		LOC102723769	-	uncharacterized LOC102723769	ncRNA
siCtrl_G9a_GST_peak_3533	chr2	19358710	19359403	+	168	NA	Intergenic	Intergenic	-132330	NR_135287	400945	Hs.502854	NR_135287	ENSG00000236204	LINC01376	-	long intergenic non-protein coding RNA 1376	ncRNA
siCtrl_G9a_GST_peak_656	chr1	168659150	168659759	+	167	NA	Intergenic	Intergenic	38990	NM_001937	1805	Hs.80552	NM_001937	ENSG00000143196	DPT	TRAMP	dermatopontin	protein-coding
siCtrl_G9a_GST_peak_1620	chr12	17963498	17963840	+	167	NA	Intergenic	Intergenic	137436	NR_039770	100616279		NR_039770	ENSG00000283665	MIR3974	-	microRNA 3974	ncRNA
siCtrl_G9a_GST_peak_2862	chr16	54751795	54752100	+	167	NA	Intergenic	Intergenic	130198	NR_134971	101927480	Hs.499208	NR_134971	ENSG00000245694	LOC101927480	-	uncharacterized LOC101927480	ncRNA
siCtrl_G9a_GST_peak_6021	chr6	154413703	154413877	+	167	NA	TTS (NM_001285528)	TTS (NM_001285528)	2893	NM_001285528	4988	Hs.2353	NM_000914	ENSG00000112038	OPRM1	LMOR|M-OR-1|MOP|MOR|MOR1|OPRM	opioid receptor mu 1	protein-coding
siCtrl_G9a_GST_peak_5703	chr6	56353217	56353391	+	167	NA	intron (NM_001144769, intron 80 of 96)	intron (NM_001144769, intron 80 of 96)	-94378	NM_001318752	81578	Hs.47629	NM_030820	ENSG00000124749	COL21A1	COLA1L|FP633	collagen type XXI alpha 1 chain	protein-coding
siCtrl_G9a_GST_peak_3919	chr2	108078587	108079101	+	167	NA	Intergenic	L2b|LINE|L2	-67031	NR_146968	105373537		NR_146968	ENSG00000224568	LINC01886	-	long intergenic non-protein coding RNA 1886	ncRNA
siCtrl_G9a_GST_peak_679	chr1	175761348	175761687	+	167	NA	Intergenic	Intergenic	-48786	NM_003285	7143	Hs.659864	NM_003285	ENSG00000116147	TNR	TN-R	tenascin R	protein-coding
siCtrl_G9a_GST_peak_7028	chr9	85082062	85082187	+	167	NA	Intergenic	Intergenic	478437	NM_001001670	389763	Hs.209545	NM_001001670	ENSG00000214929	SPATA31D1	FAM75D1	SPATA31 subfamily D member 1	protein-coding
siCtrl_G9a_GST_peak_1816	chr12	67871567	67871738	+	167	NA	Intergenic	Intergenic	-35313	NR_146500	102724433		NR_146500	ENSG00000256172	LINC02420	-	long intergenic non-protein coding RNA 2420	ncRNA
siCtrl_G9a_GST_peak_1730	chr12	44494600	44495577	+	167	NA	intron (NM_001286212, intron 3 of 6)	intron (NM_001286212, intron 3 of 6)	265204	NM_032256	84216	Hs.444668	NM_032256	ENSG00000139173	TMEM117	-	transmembrane protein 117	protein-coding
siCtrl_G9a_GST_peak_6631	chr8	37345215	37345892	+	167	NA	intron (NR_121620, intron 1 of 6)	intron (NR_121620, intron 1 of 6)	5878	NR_121620	100507420	Hs.105962	NR_121620		LINC01605	LincDUSP	long intergenic non-protein coding RNA 1605	ncRNA
siCtrl_G9a_GST_peak_4815	chr3	143056390	143056638	+	167	NA	intron (NM_173653, intron 14 of 15)	MER5A|DNA|hAT-Charlie	-4574	NR_048544	100885796	Hs.581618	NR_048544	ENSG00000240012	SLC9A9-AS1	-	SLC9A9 antisense RNA 1	ncRNA
siCtrl_G9a_GST_peak_651	chr1	168318213	168318281	+	167	NA	Intergenic	L1PA2|LINE|L1	-26515	NR_030284	693142		NR_030284	ENSG00000207974	MIR557	MIRN557|hsa-mir-557	microRNA 557	ncRNA
siCtrl_G9a_GST_peak_6242	chr7	41091970	41092548	+	167	NA	Intergenic	Intergenic	-48943	NR_110832	101928773	Hs.382363	NR_110832	ENSG00000224017	LINC01449	-	long intergenic non-protein coding RNA 1449	ncRNA
siCtrl_G9a_GST_peak_2514	chr15	48179316	48180029	+	166	NA	Intergenic	Intergenic	-41239	NR_120336	101928442	Hs.242804	NR_120336	ENSG00000259572	LINC01491	-	long intergenic non-protein coding RNA 1491	ncRNA
siCtrl_G9a_GST_peak_6459	chr7	131962151	131962358	+	166	NA	intron (NM_020911, intron 4 of 31)	intron (NM_020911, intron 4 of 31)	16634	NR_134565	101928807	Hs.552131	NR_134565		LOC101928807	-	uncharacterized LOC101928807	ncRNA
siCtrl_G9a_GST_peak_6745	chr8	92673814	92674197	+	166	NA	Intergenic	Intergenic	355903	NM_175636	862	Hs.368431	NM_004349	ENSG00000079102	RUNX1T1	AML1-MTG8|AML1T1|CBFA2T1|CDR|ETO|MTG8|ZMYND2	RUNX1 partner transcriptional co-repressor 1	protein-coding
siCtrl_G9a_GST_peak_160	chr1	61692388	61692810	+	166	NA	intron (NM_001145512, intron 3 of 11)	intron (NM_001145512, intron 3 of 11)	26591	NR_104180	645030	Hs.632410	NR_104180	ENSG00000237853	NFIA-AS1	-	NFIA antisense RNA 1	ncRNA
siCtrl_G9a_GST_peak_993	chr1	232655081	232655266	+	166	NA	Intergenic	Intergenic	-3819	NM_020808	57568	Hs.745009	NM_020808	ENSG00000116991	SIPA1L2	SPAL2|SPAR2	signal induced proliferation associated 1 like 2	protein-coding
siCtrl_G9a_GST_peak_6806	chr8	123020883	123021275	+	165	NA	Intergenic	Intergenic	-367399	NM_005328	3037	Hs.159226	NM_005328	ENSG00000170961	HAS2	-	hyaluronan synthase 2	protein-coding
siCtrl_G9a_GST_peak_81	chr1	56840145	56840327	+	165	NA	Intergenic	Intergenic	-40399	NR_147163	105378744	Hs.183974	NR_147163	ENSG00000223956	LINC01767	-	long intergenic non-protein coding RNA 1767	ncRNA
siCtrl_G9a_GST_peak_1040	chr1	241540081	241540443	+	164	NA	Intergenic	MLT1I|LTR|ERVL-MaLR	-19732	NM_001282775	6000	Hs.655739	NM_002924	ENSG00000182901	RGS7	-	regulator of G protein signaling 7	protein-coding
siCtrl_G9a_GST_peak_1684	chr12	31015373	31015863	+	164	NA	Intergenic	Intergenic	-64064	NM_001370302	441631	Hs.505141	NM_001080509	ENSG00000110900	TSPAN11	VSSW1971	tetraspanin 11	protein-coding
siCtrl_G9a_GST_peak_6788	chr8	106813395	106814325	+	162	NA	exon (NM_001362836, exon 7 of 7)	exon (NM_001362836, exon 7 of 7)	258871	NR_125797	102723356	Hs.571413	NR_125796		ZFPM2-AS1	SCAT3	ZFPM2 antisense RNA 1	ncRNA
siCtrl_G9a_GST_peak_4578	chr3	15580658	15580992	+	162	NA	Intergenic	MamGypLTR2c|LTR|Gypsy	-17612	NM_080539	8292	Hs.146735	NM_005677	ENSG00000206561	COLQ	CMS5|EAD	collagen like tail subunit of asymmetric acetylcholinesterase	protein-coding
siCtrl_G9a_GST_peak_720	chr1	197784779	197785181	+	162	NA	Intergenic	Intergenic	-40370	NM_001300858	163486	Hs.125056	NM_019049	ENSG00000213047	DENND1B	C1ORF18|C1orf218|FAM31B	DENN domain containing 1B	protein-coding
siCtrl_G9a_GST_peak_1871	chr12	76118772	76119064	+	162	NA	Intergenic	Intergenic	-213529	NM_007043	11103	Hs.645517	NM_007043	ENSG00000111615	KRR1	HRB2|RIP-1	KRR1 small subunit processome component homolog	protein-coding
siCtrl_G9a_GST_peak_2162	chr13	37460496	37460745	+	162	NA	intron (NM_005905, intron 1 of 5)	intron (NM_005905, intron 1 of 5)	33755	NM_005905	4093	Hs.123119	NM_005905	ENSG00000120693	SMAD9	MADH6|MADH9|PPH2|SMAD8|SMAD8/9|SMAD8A|SMAD8B	SMAD family member 9	protein-coding
siCtrl_G9a_GST_peak_5583	chr6	16402900	16403183	+	162	NA	intron (NM_001357857, intron 7 of 8)	intron (NM_001357857, intron 7 of 8)	164223	NM_006877	2766	Hs.484741	NM_006877	ENSG00000137198	GMPR	GMPR 1|GMPR1	guanosine monophosphate reductase	protein-coding
siCtrl_G9a_GST_peak_3619	chr2	38445603	38446007	+	162	NA	Intergenic	Intergenic	87558	NR_027252	285154	Hs.353894	NM_173652	ENSG00000232973	CYP1B1-AS1	C2orf58	CYP1B1 antisense RNA 1	ncRNA
siCtrl_G9a_GST_peak_5869	chr6	112524015	112524429	+	162	NA	intron (NM_001105206, intron 4 of 38)	intron (NM_001105206, intron 4 of 38)	-33575	NR_121193	101927640	Hs.510007	NR_121193		LOC101927640	-	uncharacterized LOC101927640	ncRNA
siCtrl_G9a_GST_peak_1403	chr11	35270254	35270343	+	162	NA	Intergenic	Intergenic	85801	NR_145794	109623487		NR_145794		SNORD164	-	small nucleolar RNA, C/D box 164	snoRNA
siCtrl_G9a_GST_peak_3675	chr2	46041977	46042364	+	160	NA	intron (NM_005400, intron 1 of 14)	intron (NM_005400, intron 1 of 14)	163356	NM_005400	5581	Hs.580351	NM_005400	ENSG00000171132	PRKCE	PKCE|nPKC-epsilon	protein kinase C epsilon	protein-coding
siCtrl_G9a_GST_peak_232	chr1	74895153	74895618	+	159	NA	intron (NM_015978, intron 17 of 24)	intron (NM_015978, intron 17 of 24)	53739	NM_001364665	105378803		NM_001364665	ENSG00000162621	LRRC53	-	leucine rich repeat containing 53	protein-coding
siCtrl_G9a_GST_peak_2525	chr15	48550862	48551235	+	159	NA	intron (NM_000338, intron 16 of 26)	THE1B|LTR|ERVL-MaLR	52549	NM_001184832	6557	Hs.123116	NM_000338	ENSG00000074803	SLC12A1	BSC1|NKCC2	solute carrier family 12 member 1	protein-coding
siCtrl_G9a_GST_peak_1581	chr12	2629375	2629801	+	159	NA	intron (NM_001167623, intron 9 of 46)	intron (NM_001167623, intron 9 of 46)	151798	NR_046579	100874235	Hs.667644	NR_046579	ENSG00000256271	CACNA1C-AS2	-	CACNA1C antisense RNA 2	ncRNA
siCtrl_G9a_GST_peak_4312	chr20	36254344	36254967	+	159	NA	Intergenic	LTR16A|LTR|ERVL	-3134	NR_047461	100861522	Hs.580680	NR_047461	ENSG00000225759	LINC00489	-	long intergenic non-protein coding RNA 489	ncRNA
siCtrl_G9a_GST_peak_6456	chr7	131910548	131910741	+	159	NA	intron (NM_020911, intron 8 of 31)	intron (NM_020911, intron 8 of 31)	-34976	NR_134565	101928807	Hs.552131	NR_134565		LOC101928807	-	uncharacterized LOC101928807	ncRNA
siCtrl_G9a_GST_peak_7301	chrX	150872331	150872394	+	159	NA	Intergenic	L1M4b|LINE|L1	5583	NR_033262	79057	Hs.209253	NM_024082	ENSG00000130032	PRRG3	PRGP3|TMG3	proline rich and Gla domain 3	protein-coding
siCtrl_G9a_GST_peak_1641	chr12	23714244	23714689	+	158	NA	intron (NM_001261414, intron 13 of 16)	intron (NM_001261414, intron 13 of 16)	23054	NM_178010	6660	Hs.434948	NM_006940	ENSG00000134532	SOX5	L-SOX5|L-SOX5B|L-SOX5F|LAMSHF	SRY-box transcription factor 5	protein-coding
siCtrl_G9a_GST_peak_3114	chr17	55622684	55623079	+	158	NA	intron (NM_001322250, intron 7 of 13)	intron (NM_001322250, intron 7 of 13)	-21923	NR_110808	101927557	Hs.639984	NR_110808	ENSG00000266100	LOC101927557	-	uncharacterized LOC101927557	ncRNA
siCtrl_G9a_GST_peak_6085	chr6	170394723	170395103	+	158	NA	Intergenic	Intergenic	-80953	NR_125878	102724511	Hs.550045	NR_125878		LOC102724511	-	uncharacterized LOC102724511	ncRNA
siCtrl_G9a_GST_peak_447	chr1	117041697	117041830	+	157	NA	Intergenic	Intergenic	-20315	NR_125972	101929023	Hs.668091	NR_125972	ENSG00000233154	LINC01762	-	long intergenic non-protein coding RNA 1762	ncRNA
siCtrl_G9a_GST_peak_5981	chr6	142839353	142839740	+	157	NA	Intergenic	L1PB1|LINE|L1	119427	NR_027311	153910	Hs.350819	NR_027311	ENSG00000236366	LOC153910	-	uncharacterized LOC153910	ncRNA
siCtrl_G9a_GST_peak_2799	chr16	16540181	16540459	+	157	NA	Intergenic	LTR16B2|LTR|ERVL	67218	NM_001282507	101059938	Hs.634612	NM_001282507	ENSG00000214967	NPIPA7	NPIPA8	nuclear pore complex interacting protein family member A7	protein-coding
siCtrl_G9a_GST_peak_2488	chr15	46559043	46559114	+	157	NA	Intergenic	LTR27|LTR|ERV1	561685	NR_135680	105370802	Hs.447522	NR_135680	ENSG00000259200	LOC105370802	-	uncharacterized LOC105370802	ncRNA
siCtrl_G9a_GST_peak_919	chr1	221096359	221096562	+	156	NA	Intergenic	Intergenic	-42978	NR_046901	100873924	Hs.645593	NR_046901	ENSG00000257551	HLX-AS1	-	HLX antisense RNA 1	ncRNA
siCtrl_G9a_GST_peak_4288	chr20	24353689	24354133	+	156	NA	Intergenic	Intergenic	-95924	NM_001323606	79953	Hs.124638	NM_024893	ENSG00000101463	SYNDIG1	C20orf39|DSPC2|IFITMD5|TMEM90B	synapse differentiation inducing 1	protein-coding
siCtrl_G9a_GST_peak_5719	chr6	65035033	65035263	+	156	NA	intron (NM_001292009, intron 29 of 43)	L1PBa|LINE|L1	518419	NR_157848	112935969		NR_157848		SCAT8	EYS-AS1	S-phase cancer associated transcript 8	ncRNA
siCtrl_G9a_GST_peak_5363	chr5	115319436	115319939	+	156	NA	intron (NM_173800, intron 2 of 19)	intron (NM_173800, intron 2 of 19)	21515	NM_173800	206338	Hs.98288	NM_173800	ENSG00000172901	LVRN	APQ|AQPEP|TAQPEP	laeverin	protein-coding
siCtrl_G9a_GST_peak_1089	chr10	18370148	18370483	+	156	NA	Intergenic	Intergenic	-59038	NM_201572	783	Hs.59093	NM_000724	ENSG00000165995	CACNB2	CACNLB2|CAVB2|MYSB	calcium voltage-gated channel auxiliary subunit beta 2	protein-coding
siCtrl_G9a_GST_peak_4477	chr22	18718043	18718177	+	156	NA	Intergenic	AluSc8|SINE|Alu	-3317	NR_136561	642643		NR_136561	ENSG00000182824	FAM230E	LINC01662	family with sequence similarity 230 member E	ncRNA
siCtrl_G9a_GST_peak_5314	chr5	73922322	73922711	+	156	NA	TTS (NR_046318)	TTS (NR_046318)	-13332	NM_001292004	3074	Hs.69293	NM_000521	ENSG00000049860	HEXB	ENC-1AS|HEL-248|HEL-S-111	hexosaminidase subunit beta	protein-coding
siCtrl_G9a_GST_peak_2363	chr14	62417080	62417287	+	156	NA	intron (NM_001367663, intron 1 of 7)	intron (NM_001367663, intron 1 of 7)	22770	NM_001367663	83851	Hs.404139	NM_031914	ENSG00000139973	SYT16	CHR14SYT|SYT14L|Strep14|syt14r	synaptotagmin 16	protein-coding
siCtrl_G9a_GST_peak_5962	chr6	136434892	136435249	+	156	NA	intron (NM_018945, intron 3 of 12)	intron (NM_018945, intron 3 of 12)	-41105	NR_149042	644135	Hs.126980	NR_149042	ENSG00000237596	LOC644135	-	uncharacterized LOC644135	ncRNA
siCtrl_G9a_GST_peak_4212	chr2	243182747	243182886	+	156	NA	Intergenic	Intergenic	152032	NR_130701	728323	Hs.380737	NR_024437		LINC01881	-	long intergenic non-protein coding RNA 1881	ncRNA
siCtrl_G9a_GST_peak_3830	chr2	75451829	75452514	+	156	NA	Intergenic	Intergenic	-25525	NM_015727	6869	Hs.633301	NM_001058	ENSG00000115353	TACR1	NK1R|NKIR|SPR|TAC1R	tachykinin receptor 1	protein-coding
siCtrl_G9a_GST_peak_4010	chr2	159942955	159943104	+	156	NA	intron (NM_033394, intron 3 of 26)	intron (NM_033394, intron 3 of 26)	-100317	NR_106948	102465535		NR_106948	ENSG00000275141	MIR6888	hsa-mir-6888	microRNA 6888	ncRNA
siCtrl_G9a_GST_peak_2092	chr12	127882619	127882810	+	156	NA	Intergenic	MLT1E|LTR|ERVL-MaLR	-58097	NR_110057	101927616	Hs.637827	NR_110057	ENSG00000256362	LINC02375	-	long intergenic non-protein coding RNA 2375	ncRNA
siCtrl_G9a_GST_peak_982	chr1	232154388	232154789	+	156	NA	intron (NM_018662, intron 11 of 12)	intron (NM_018662, intron 11 of 12)	93008	NR_126441	104472714		NR_126441	ENSG00000226758	DISC1-IT1	-	DISC1 intronic transcript 1	ncRNA
siCtrl_G9a_GST_peak_1314	chr10	130950784	130951382	+	156	NA	Intergenic	MER81|DNA|hAT-Blackjack	239986	NR_148990	728327	Hs.454452	NR_148990	ENSG00000224190	LINC02667	-	long intergenic non-protein coding RNA 2667	ncRNA
siCtrl_G9a_GST_peak_6840	chr8	131341261	131341573	+	156	NA	intron (NM_018482, intron 3 of 29)	intron (NM_018482, intron 3 of 29)	-32638	NR_002765	29065	Hs.639318	NR_002765		ASAP1-IT1	ASAP1-IT|ASAP1IT|ASAP1IT1|DDEF1IT1|HSPC054|NCRNA00050	ASAP1 intronic transcript 1	ncRNA
siCtrl_G9a_GST_peak_5330	chr5	97446613	97446859	+	156	NA	intron (NR_146477, intron 3 of 4)	MER1B|DNA|hAT-Charlie	50207	NR_146477	105379098	Hs.566306	NR_146477		LINC01846	-	long intergenic non-protein coding RNA 1846	ncRNA
siCtrl_G9a_GST_peak_5806	chr6	102074244	102074353	+	156	NA	exon (NM_021956, exon 3 of 16)	exon (NM_021956, exon 3 of 16)	227437	NM_021956	2898	Hs.98262	NM_021956	ENSG00000164418	GRIK2	EAA4|GLR6|GLUK6|GLUR6|GluK2|MRT6	glutamate ionotropic receptor kainate type subunit 2	protein-coding
siCtrl_G9a_GST_peak_7032	chr9	85297387	85297628	+	156	NA	Intergenic	Intergenic	380550	NM_152573	158158	Hs.129136	NM_152573	ENSG00000165105	RASEF	RAB45	RAS and EF-hand domain containing	protein-coding
siCtrl_G9a_GST_peak_234	chr1	75277417	75277837	+	156	NA	Intergenic	Intergenic	-78535	NM_001130043	1429	Hs.83114	NM_001889	ENSG00000116791	CRYZ	-	crystallin zeta	protein-coding
siCtrl_G9a_GST_peak_349	chr1	97603557	97604049	+	156	NA	intron (NM_000110, intron 20 of 22)	intron (NM_000110, intron 20 of 22)	42324	NR_046590	100873932	Hs.682651	NR_046590	ENSG00000232878	DPYD-AS1	-	DPYD antisense RNA 1	ncRNA
siCtrl_G9a_GST_peak_4638	chr3	41026769	41027152	+	156	NA	Intergenic	LTR16A2|LTR|ERVL	-214036	NM_001098209	1499	Hs.476018	NM_001904	ENSG00000168036	CTNNB1	CTNNB|EVR7|MRD19|NEDSDV|armadillo	catenin beta 1	protein-coding
siCtrl_G9a_GST_peak_5285	chr5	70693405	70693480	+	156	NA	intron (NR_134268, intron 2 of 2)	LTR17|LTR|ERV1	21830	NR_003922	5370	Hs.742169	NM_031888	ENSG00000169040	PMCHL2	-	pro-melanin concentrating hormone like 2 (pseudogene)	pseudo
siCtrl_G9a_GST_peak_2457	chr15	32612786	32612934	+	156	NA	Intergenic	MLT1F2|LTR|ERVL-MaLR	82633	NM_001282493	653125		NM_001282493	ENSG00000249931	GOLGA8K	-	golgin A8 family member K	protein-coding
siCtrl_G9a_GST_peak_7080	chr9	104342257	104342742	+	156	NA	intron (NM_133445, intron 6 of 8)	MER72B|LTR|ERV1	14752	NM_147180	5535	Hs.151167	NM_147180	ENSG00000188386	PPP3R2	PPP3RL	protein phosphatase 3 regulatory subunit B, beta	protein-coding
siCtrl_G9a_GST_peak_4668	chr3	61912939	61913167	+	156	NA	intron (NM_002841, intron 2 of 29)	intron (NM_002841, intron 2 of 29)	365808	NM_002841	5793	Hs.595541	NM_002841	ENSG00000144724	PTPRG	HPTPG|PTPG|R-PTP-GAMMA|RPTPG	protein tyrosine phosphatase receptor type G	protein-coding
siCtrl_G9a_GST_peak_659	chr1	169055061	169056318	+	156	NA	intron (NR_104091, intron 1 of 4)	intron (NR_104091, intron 1 of 4)	554	NR_104091	101978719	Hs.517849	NR_104091	ENSG00000203601	LINC00970	-	long intergenic non-protein coding RNA 970	ncRNA
siCtrl_G9a_GST_peak_4011	chr2	162136710	162136863	+	155	NA	Intergenic	MER21B|LTR|ERVL	-25632	NR_110593	101929512	Hs.666488	NR_110593		LOC101929512	-	uncharacterized LOC101929512	ncRNA
siCtrl_G9a_GST_peak_5246	chr5	53966188	53966311	+	155	NA	intron (NR_104658, intron 1 of 2)	LTR88a|LTR|Gypsy?	32903	NR_104659	102467080	Hs.637409	NR_104658		LOC102467080	-	uncharacterized LOC102467080	ncRNA
siCtrl_G9a_GST_peak_3049	chr17	52258154	52258560	+	155	NA	Intergenic	MamRep1527|LTR|LTR	358069	NM_032559	84643	Hs.226805	NM_032559	ENSG00000141200	KIF2B	-	kinesin family member 2B	protein-coding
siCtrl_G9a_GST_peak_5817	chr6	104781299	104781794	+	154	NA	Intergenic	Intergenic	525875	NM_001321083	57531	Hs.434340	NM_020771	ENSG00000085382	HACE1	SPPRS	HECT domain and ankyrin repeat containing E3 ubiquitin protein ligase 1	protein-coding
siCtrl_G9a_GST_peak_1996	chr12	106136011	106136450	+	154	NA	non-coding (NR_110108, exon 3 of 3)	non-coding (NR_110108, exon 3 of 3)	35678	NR_110111	101929110	Hs.145944	NR_110108	ENSG00000257859	CASC18	-	cancer susceptibility 18	ncRNA
siCtrl_G9a_GST_peak_5972	chr6	140247622	140248106	+	154	NA	Intergenic	Intergenic	-49592	NR_121623	100507477	Hs.179213	NR_121622	ENSG00000236013	LOC100507477	-	uncharacterized LOC100507477	ncRNA
siCtrl_G9a_GST_peak_2308	chr14	19916429	19917045	+	154	NA	intron (NR_122112, intron 6 of 7).2	intron (NR_122112, intron 6 of 7).2	8592	NR_122112	503638	Hs.474095	NR_122111		DUXAP9	LINC01296	double homeobox A pseudogene 9	pseudo
siCtrl_G9a_GST_peak_2143	chr13	31699275	31699817	+	154	NA	Intergenic	Intergenic	36495	NM_006644	10808	Hs.743267	NM_006644	ENSG00000120694	HSPH1	HSP105|HSP105A|HSP105B|NY-CO-25	heat shock protein family H (Hsp110) member 1	protein-coding
siCtrl_G9a_GST_peak_1853	chr12	70983869	70983955	+	154	NA	exon (NM_001109754, exon 8 of 34)	exon (NM_001109754, exon 8 of 34)	19892	NM_001206972	5787	Hs.201030	NM_002837	ENSG00000127329	PTPRB	HPTP-BETA|HPTPB|PTPB|R-PTP-BETA|VEPTP	protein tyrosine phosphatase receptor type B	protein-coding
siCtrl_G9a_GST_peak_4328	chr20	40533943	40534312	+	154	NA	Intergenic	Intergenic	-287111	NM_032221	84181	Hs.740645	NM_032221	ENSG00000124177	CHD6	CHD-6|CHD5|RIGB	chromodomain helicase DNA binding protein 6	protein-coding
siCtrl_G9a_GST_peak_5528	chr6	5478967	5479074	+	154	NA	intron (NM_001318872, intron 4 of 6)	intron (NM_001318872, intron 4 of 6)	-20712	NR_125848	101927972	Hs.668417	NR_125846	ENSG00000269985	LOC101927972	-	uncharacterized LOC101927972	ncRNA
siCtrl_G9a_GST_peak_6026	chr6	155361423	155361562	+	154	NA	Intergenic	Intergenic	-49931	NM_012454	26230	Hs.586279	NM_012454	ENSG00000146426	TIAM2	STEF|TIAM-2	T cell lymphoma invasion and metastasis 2	protein-coding
siCtrl_G9a_GST_peak_3798	chr2	68936650	68937008	+	154	NA	Intergenic	Intergenic	-25114	NM_001007231	9938	Hs.531807	NM_014882	ENSG00000163219	ARHGAP25	HEL-S-308|KAIA0053	Rho GTPase activating protein 25	protein-coding
siCtrl_G9a_GST_peak_6137	chr7	24950290	24950726	+	154	NA	intron (NM_015550, intron 1 of 22)	MER5B|DNA|hAT-Charlie	-18268	NM_145320	26031	Hs.520259	NM_015550	ENSG00000070882	OSBPL3	ORP-3|ORP3|OSBP3	oxysterol binding protein like 3	protein-coding
siCtrl_G9a_GST_peak_2282	chr13	102856316	102856608	+	154	NA	intron (NM_001321944, intron 1 of 5)	intron (NM_001321944, intron 1 of 5)	106574	NM_001321933	2259	Hs.508616	NM_004115	ENSG00000102466	FGF14	FGF-14|FHF-4|FHF4|SCA27	fibroblast growth factor 14	protein-coding
siCtrl_G9a_GST_peak_5643	chr6	37471491	37471825	+	154	NA	Intergenic	Intergenic	-3466	NR_126057	100505530	Hs.582978	NM_001039791		LINC02520	-	long intergenic non-protein coding RNA 2520	ncRNA
siCtrl_G9a_GST_peak_179	chr1	64141247	64141493	+	154	NA	Intergenic	Intergenic	52483	NM_001172818	5236	Hs.1869	NM_002633	ENSG00000079739	PGM1	CDG1T|GSD14	phosphoglucomutase 1	protein-coding
siCtrl_G9a_GST_peak_3254	chr17	78589290	78589474	+	154	NA	intron (NM_001163034, intron 1 of 29)	intron (NM_001163034, intron 1 of 29)	70744	NM_020761	57521	Hs.133044	NM_020761	ENSG00000141564	RPTOR	KOG1|Mip1	regulatory associated protein of MTOR complex 1	protein-coding
siCtrl_G9a_GST_peak_2673	chr15	86632584	86632771	+	154	NA	intron (NR_120368, intron 3 of 5)	intron (NR_120368, intron 3 of 5)	9826	NM_152336	123624	Hs.31795	NM_152336	ENSG00000273540	AGBL1	CCP4|FECD8	ATP/GTP binding protein like 1	protein-coding
siCtrl_G9a_GST_peak_6453	chr7	131762808	131763057	+	154	NA	Intergenic	Intergenic	167953	NR_110836	101928782	Hs.571369	NR_110836	ENSG00000224865	LOC101928782	-	uncharacterized LOC101928782	ncRNA
siCtrl_G9a_GST_peak_6018	chr6	154392430	154392546	+	154	NA	intron (NM_001285522, intron 1 of 1)	intron (NM_001285522, intron 1 of 1)	-15154	NM_001145287	4988	Hs.2353	NM_000914	ENSG00000112038	OPRM1	LMOR|M-OR-1|MOP|MOR|MOR1|OPRM	opioid receptor mu 1	protein-coding
siCtrl_G9a_GST_peak_4708	chr3	73535205	73535559	+	154	NA	intron (NM_015009, intron 3 of 9)	intron (NM_015009, intron 3 of 9)	-11599	NM_001303141	23024	Hs.660347	NM_015009	ENSG00000121440	PDZRN3	LNX3|SEMACAP3|SEMCAP3	PDZ domain containing ring finger 3	protein-coding
siCtrl_G9a_GST_peak_3186	chr17	68559298	68559608	+	154	NA	Intergenic	Intergenic	393777	NM_000891	3759	Hs.1547	NM_000891	ENSG00000123700	KCNJ2	ATFB9|HHBIRK1|HHIRK1|IRK1|KIR2.1|LQT7|SQT3	potassium voltage-gated channel subfamily J member 2	protein-coding
siCtrl_G9a_GST_peak_4006	chr2	159029588	159029953	+	154	NA	intron (NM_138803, intron 13 of 13)	intron (NM_138803, intron 13 of 13)	6608	NR_038850	554201	Hs.570262	NR_038850	ENSG00000227480	CCDC148-AS1	-	CCDC148 antisense RNA 1	ncRNA
siCtrl_G9a_GST_peak_5276	chr5	65702451	65702774	+	154	NA	Intergenic	Intergenic	104820	NR_105001	101928769	Hs.97903	NR_105001	ENSG00000250313	LINC02229	-	long intergenic non-protein coding RNA 2229	ncRNA
siCtrl_G9a_GST_peak_1613	chr12	16466653	16467193	+	154	NA	Intergenic	ERVL-E-int|LTR|ERVL	-33153	NM_145792	4257	Hs.389700	NM_020300	ENSG00000008394	MGST1	GST12|MGST|MGST-I	microsomal glutathione S-transferase 1	protein-coding
siCtrl_G9a_GST_peak_7094	chr9	110846014	110846279	+	154	NA	Intergenic	L2c|LINE|L2	-594096	NM_004235	9314	Hs.376206	NM_004235	ENSG00000136826	KLF4	EZF|GKLF	Kruppel like factor 4	protein-coding
siCtrl_G9a_GST_peak_5414	chr5	142196148	142196252	+	153	NA	intron (NM_001349547, intron 1 of 21)	L2c|LINE|L2	45408	NM_001349547	23092	Hs.654668	NM_015071	ENSG00000145819	ARHGAP26	GRAF|GRAF1|OPHN1L|OPHN1L1	Rho GTPase activating protein 26	protein-coding
siCtrl_G9a_GST_peak_798	chr1	209424533	209424782	+	153	NA	Intergenic	MLT1K|LTR|ERVL-MaLR	-74144	NR_135085	105372897	Hs.116154	NR_135085	ENSG00000227940	LINC01696	-	long intergenic non-protein coding RNA 1696	ncRNA
siCtrl_G9a_GST_peak_1108	chr10	33946238	33946375	+	153	NA	Intergenic	Intergenic	115302	NR_038932	100505583	Hs.568804	NR_038932	ENSG00000261683	LINC00838	-	long intergenic non-protein coding RNA 838	ncRNA
siCtrl_G9a_GST_peak_2546	chr15	55975462	55975735	+	153	NA	intron (NM_173814, intron 3 of 19)	intron (NM_173814, intron 3 of 19)	59752	NM_173814	283659	Hs.130957	NM_173814	ENSG00000166450	PRTG	IGDCC5	protogenin	protein-coding
siCtrl_G9a_GST_peak_4657	chr3	57154133	57154387	+	153	NA	intron (NM_001318864, intron 3 of 13)	intron (NM_001318864, intron 3 of 13)	-40964	NM_001128615	50650	Hs.476402	NM_019555	ENSG00000163947	ARHGEF3	GEF3|STA3|XPLN	Rho guanine nucleotide exchange factor 3	protein-coding
siCtrl_G9a_GST_peak_3912	chr2	106429385	106429464	+	153	NA	intron (NM_001004722, intron 1 of 3)	intron (NM_001004722, intron 1 of 3)	-38879	NM_001004720	8440	Hs.529244	NM_003581	ENSG00000071051	NCK2	GRB4|NCKbeta	NCK adaptor protein 2	protein-coding
siCtrl_G9a_GST_peak_1439	chr11	68962151	68962236	+	153	NA	Intergenic	HAL1-2a_MD|LINE|L1	-23163	NR_104161	338694	Hs.564235	NR_104161	ENSG00000261070	LOC338694	-	uncharacterized LOC338694	ncRNA
siCtrl_G9a_GST_peak_2607	chr15	69431712	69431886	+	153	NA	Intergenic	L3|LINE|CR1	-21137	NM_001324091	26035	Hs.183006	NM_015554	ENSG00000138604	GLCE	HSEPI	glucuronic acid epimerase	protein-coding
siCtrl_G9a_GST_peak_6493	chr7	135583086	135583381	+	153	NA	Intergenic	MLT2B1|LTR|ERVL	78874	NM_001128619	767558	Hs.602015	NM_001128619	ENSG00000267697	LUZP6	MPD6|MTPNUT	leucine zipper protein 6	protein-coding
siCtrl_G9a_GST_peak_5292	chr5	72048470	72048673	+	153	NA	Intergenic	Intergenic	-63847	NM_002270	3842	Hs.482497	NM_002270	ENSG00000083312	TNPO1	IPO2|KPNB2|MIP|MIP1|TRN	transportin 1	protein-coding
siCtrl_G9a_GST_peak_1246	chr10	97849965	97850329	+	152	NA	promoter-TSS (NR_038444)	promoter-TSS (NR_038444)	-155	NR_038444	728558	Hs.538374	NR_038444	ENSG00000226688	ENTPD1-AS1	-	ENTPD1 antisense RNA 1	ncRNA
siCtrl_G9a_GST_peak_4070	chr2	194773319	194773388	+	152	NA	Intergenic	AluYa5|SINE|Alu	-435640	NR_110222	101927406	Hs.385793	NR_110222	ENSG00000225539	LINC01821	-	long intergenic non-protein coding RNA 1821	ncRNA
siCtrl_G9a_GST_peak_3424	chr19	35168118	35168273	+	152	NA	promoter-TSS (NM_018443)	promoter-TSS (NM_018443)	-259	NR_027620	643719	Hs.686754	NR_027620		SCGB1B2P	SCGB4A1P	secretoglobin family 1B member 2, pseudogene	pseudo
siCtrl_G9a_GST_peak_5187	chr5	10935390	10935469	+	152	NA	Intergenic	Charlie17a|DNA|hAT-Charlie	-174083	NM_001291963	1611	Hs.75189	NM_004394	ENSG00000112977	DAP	-	death associated protein	protein-coding
siCtrl_G9a_GST_peak_6534	chr7	149648797	149649105	+	152	NA	intron (NM_001351028, intron 6 of 9)	MLT1E3|LTR|ERVL-MaLR	77893	NM_001367795	155066	Hs.556998	NM_145230	ENSG00000171130	ATP6V0E2	ATP6V0E2L|C7orf32	ATPase H+ transporting V0 subunit e2	protein-coding
siCtrl_G9a_GST_peak_6316	chr7	67612566	67612818	+	152	NA	Intergenic	Intergenic	127452	NR_120514	102723427	Hs.583491	NR_120514	ENSG00000225209	LOC102723427	-	uncharacterized LOC102723427	ncRNA
siCtrl_G9a_GST_peak_3810	chr2	73964577	73964950	+	151	NA	promoter-TSS (NM_016058)	promoter-TSS (NM_016058)	-230	NM_001330390	51002	Hs.157401	NM_016058	ENSG00000144034	TPRKB	CGI-121|CGI121|GAMOS5	TP53RK binding protein	protein-coding
siCtrl_G9a_GST_peak_311	chr1	94181019	94181606	+	151	NA	intron (NM_001261408, intron 2 of 13)	intron (NM_001261408, intron 2 of 13)	-33919	NM_003567	8412	Hs.36958	NM_003567	ENSG00000137936	BCAR3	AND-34|NSP2|SH2D3B	BCAR3 adaptor protein, NSP family member	protein-coding
siCtrl_G9a_GST_peak_4559	chr3	9242566	9243212	+	151	NA	intron (NM_014850, intron 1 of 21)	intron (NM_014850, intron 1 of 21)	8712	NR_121664	101927416	Hs.475364	NR_121663	ENSG00000228723	SRGAP3-AS2	-	SRGAP3 antisense RNA 2	ncRNA
siCtrl_G9a_GST_peak_2611	chr15	69449022	69449496	+	151	NA	Intergenic	Intergenic	-3677	NM_001324091	26035	Hs.183006	NM_015554	ENSG00000138604	GLCE	HSEPI	glucuronic acid epimerase	protein-coding
siCtrl_G9a_GST_peak_3019	chr17	45973275	45973590	+	151	NA	promoter-TSS (NR_135480)	promoter-TSS (NR_135480)	-170	NM_003110	6668	Hs.514276	NM_003110	ENSG00000167182	SP2	-	Sp2 transcription factor	protein-coding
siCtrl_G9a_GST_peak_1478	chr11	78460448	78460753	+	150	NA	intron (NM_001098816, intron 19 of 33)	intron (NM_001098816, intron 19 of 33)	-174691	NM_001243251	79731	Hs.503389	NM_024678	ENSG00000137513	NARS2	DFNB94|SLM5|asnRS	asparaginyl-tRNA synthetase 2, mitochondrial	protein-coding
siCtrl_G9a_GST_peak_3110	chr17	55498116	55498287	+	150	NA	intron (NM_001322250, intron 6 of 13)	intron (NM_001322250, intron 6 of 13)	102757	NR_110808	101927557	Hs.639984	NR_110808	ENSG00000266100	LOC101927557	-	uncharacterized LOC101927557	ncRNA
siCtrl_G9a_GST_peak_6743	chr8	92577250	92577331	+	150	NA	Intergenic	UCON10|Unknown|Unknown	315743	NM_134266	115111	Hs.354013	NM_052832	ENSG00000147606	SLC26A7	SUT2	solute carrier family 26 member 7	protein-coding
siCtrl_G9a_GST_peak_3029	chr17	49449736	49450268	+	150	NA	Intergenic	MLT1J1|LTR|ERVL-MaLR	35926	NR_122104	440446	Hs.626751	NR_122104	ENSG00000267452	LINC02072	-	long intergenic non-protein coding RNA 2072	ncRNA
siCtrl_G9a_GST_peak_667	chr1	172820390	172820567	+	150	NA	Intergenic	LTR19-int|LTR|ERV1	192235	NM_000639	356	Hs.2007	NM_000639	ENSG00000117560	FASLG	ALPS1B|APT1LG1|APTL|CD178|CD95-L|CD95L|FASL|TNFSF6|TNLG1A	Fas ligand	protein-coding
siCtrl_G9a_GST_peak_5462	chr5	163086097	163086530	+	150	NA	Intergenic	Intergenic	153688	NM_013283	27430	Hs.54642	NM_013283	ENSG00000038274	MAT2B	MAT-II|MATIIbeta|Nbla02999|SDR23E1|TGR	methionine adenosyltransferase 2B	protein-coding
siCtrl_G9a_GST_peak_2987	chr17	27278888	27279180	+	150	NA	promoter-TSS (NM_001033561)	promoter-TSS (NM_001033561)	-498	NM_001033561	57649	Hs.444173	NM_020889	ENSG00000109118	PHF12	PF1	PHD finger protein 12	protein-coding
siCtrl_G9a_GST_peak_4880	chr3	197097075	197097403	+	150	NA	Intergenic	Intergenic	-71047	NM_001366203	1739	Hs.292549	NM_004087	ENSG00000075711	DLG1	DLGH1|SAP-97|SAP97|hdlg	discs large MAGUK scaffold protein 1	protein-coding
siCtrl_G9a_GST_peak_580	chr1	148605351	148605712	+	150	NA	promoter-TSS (NR_104076)	promoter-TSS (NR_104076)	-459	NR_104076	101954267		NR_104076	ENSG00000207205	RNVU1-15	RNU1-121|RNU1-66|RNVU1-16|vU1.15|vU1.16	RNA, variant U1 small nuclear 15	snRNA
siCtrl_G9a_GST_peak_7326	chrY	13437250	13437391	+	149	NA	Intergenic	MER21C|LTR|ERVL	1096069	NR_033667	352887	Hs.546221	NR_033667	ENSG00000206159	GYG2P1	GYG2P	glycogenin 2 pseudogene 1	pseudo
siCtrl_G9a_GST_peak_1851	chr12	69908065	69908296	+	149	NA	intron (NM_001278354, intron 2 of 9)	MLT1N2|LTR|ERVL-MaLR	-1040	NR_145803	109623461		NR_145803		SNORA113	-	small nucleolar RNA, H/ACA box 113	snoRNA
siCtrl_G9a_GST_peak_1469	chr11	77214249	77214480	+	149	NA	Intergenic	L3|LINE|CR1	-29256	NM_001128620	5058	Hs.435714	NM_002576	ENSG00000149269	PAK1	IDDMSSD|PAKalpha	p21 (RAC1) activated kinase 1	protein-coding
siCtrl_G9a_GST_peak_961	chr1	228904099	228904709	+	149	NA	Intergenic	Intergenic	33178	NM_021205	58480	Hs.647774	NM_021205	ENSG00000116574	RHOU	ARHU|CDC42L1|G28K|WRCH1|hG28K	ras homolog family member U	protein-coding
siCtrl_G9a_GST_peak_3268	chr18	395801	396025	+	149	NA	intron (NM_130386, intron 2 of 9)	intron (NM_130386, intron 2 of 9)	104788	NM_130386	81035	Hs.464422	NM_030781	ENSG00000158270	COLEC12	CLP1|NSR2|SCARA4|SRCL	collectin subfamily member 12	protein-coding
siCtrl_G9a_GST_peak_3526	chr2	19007256	19007757	+	149	NA	Intergenic	MSTA|LTR|ERVL-MaLR	219220	NR_135287	400945	Hs.502854	NR_135287	ENSG00000236204	LINC01376	-	long intergenic non-protein coding RNA 1376	ncRNA
siCtrl_G9a_GST_peak_5421	chr5	143180268	143180650	+	149	NA	Intergenic	Intergenic	-11267	NM_021182	57824	Hs.158320	NM_021182	ENSG00000158497	HMHB1	HB-1|HB-1Y|HLA-HB1	histocompatibility minor HB-1	protein-coding
siCtrl_G9a_GST_peak_5517	chr6	1666835	1667627	+	148	NA	intron (NM_001253846, intron 9 of 10)	intron (NM_001253846, intron 9 of 10)	57081	NM_001453	2296	Hs.348883	NM_001453	ENSG00000054598	FOXC1	ARA|ASGD3|FKHL7|FREAC-3|FREAC3|IGDA|IHG1|IRID1|RIEG3	forkhead box C1	protein-coding
siCtrl_G9a_GST_peak_6532	chr7	148231950	148232020	+	148	NA	Intergenic	L1PA5|LINE|L1	-55873	NM_145304	202865	Hs.352212	NM_145304	ENSG00000170279	C7orf33	-	chromosome 7 open reading frame 33	protein-coding
siCtrl_G9a_GST_peak_3618	chr2	38444620	38444789	+	148	NA	Intergenic	L2c|LINE|L2	86457	NR_027252	285154	Hs.353894	NM_173652	ENSG00000232973	CYP1B1-AS1	C2orf58	CYP1B1 antisense RNA 1	ncRNA
siCtrl_G9a_GST_peak_391	chr1	108543372	108543696	+	148	NA	Intergenic	Intergenic	-35732	NM_006113	10451	Hs.267659	NM_006113	ENSG00000134215	VAV3	-	vav guanine nucleotide exchange factor 3	protein-coding
siCtrl_G9a_GST_peak_2370	chr14	70826463	70826572	+	148	NA	promoter-TSS (NM_016468)	promoter-TSS (NM_016468)	-117	NM_016468	51241	Hs.709581	NM_016468	ENSG00000133983	COX16	C14orf112|HSPC203|hCOX16	cytochrome c oxidase assembly factor COX16	protein-coding
siCtrl_G9a_GST_peak_4547	chr22	51082075	51082379	+	148	NA	Intergenic	LTR8|LTR|ERV1	-15647	NM_001085426	410	Hs.88251	NM_000487	ENSG00000100299	ARSA	ASA|MLD	arylsulfatase A	protein-coding
siCtrl_G9a_GST_peak_2996	chr17	40333449	40333708	+	148	NA	promoter-TSS (NM_012285)	promoter-TSS (NM_012285)	-418	NM_012285	23415	Hs.304081	NM_012285	ENSG00000089558	KCNH4	BEC2|ELK1|Kv12.3	potassium voltage-gated channel subfamily H member 4	protein-coding
siCtrl_G9a_GST_peak_3621	chr2	38491506	38492491	+	148	NA	Intergenic	Intergenic	111674	NM_001330459	64225	Hs.594950	NM_022374	ENSG00000119787	ATL2	ARL3IP2|ARL6IP2|aip-2|atlastin2	atlastin GTPase 2	protein-coding
siCtrl_G9a_GST_peak_4963	chr4	49290694	49290874	+	147	NA	Intergenic	MER21A|LTR|ERVL	302125	NM_001286791	80157	Hs.479703	NM_025087	ENSG00000109182	CWH43	CWH43-C|PGAP2IP	cell wall biogenesis 43 C-terminal homolog	protein-coding
siCtrl_G9a_GST_peak_4078	chr2	202096840	202097141	+	147	NA	Intergenic	LTR41|LTR|ERVL	-1176	NM_033355	841	Hs.599762	NM_001228	ENSG00000064012	CASP8	ALPS2B|CAP4|Casp-8|FLICE|MACH|MCH5	caspase 8	protein-coding
siCtrl_G9a_GST_peak_142	chr1	60746049	60746260	+	147	NA	Intergenic	UCON31|Unknown|Unknown	-206712	NM_152377	127795	Hs.47385	NM_152377	ENSG00000162598	C1orf87	CREF	chromosome 1 open reading frame 87	protein-coding
siCtrl_G9a_GST_peak_2696	chr15	88334870	88335453	+	147	NA	Intergenic	Intergenic	154338	NR_162119	113218493		NR_162119		MIR11181	-	microRNA 11181	ncRNA
siCtrl_G9a_GST_peak_782	chr1	208856186	208856488	+	147	NA	Intergenic	Intergenic	-45696	NR_146914	105372893	Hs.568720	NR_146914	ENSG00000232812	LINC01717	-	long intergenic non-protein coding RNA 1717	ncRNA
siCtrl_G9a_GST_peak_464	chr1	117632770	117633140	+	147	NA	intron (NM_003594, intron 14 of 22)	intron (NM_003594, intron 14 of 22)	-4310	NR_030640	100126331		NR_030640	ENSG00000215930	MIR942	MIRN942|hsa-mir-942|mir-942	microRNA 942	ncRNA
siCtrl_G9a_GST_peak_632	chr1	165924068	165924193	+	146	NA	Intergenic	MIRb|SINE|MIR	46972	NR_037431	100500832		NR_037431	ENSG00000283936	MIR3658	-	microRNA 3658	ncRNA
siCtrl_G9a_GST_peak_2476	chr15	45369659	45369990	+	146	NA	TTS (NR_034039)	TTS (NR_034039)	36535	NM_014080	50506	Hs.71377	NM_014080	ENSG00000140279	DUOX2	LNOX2|NOXEF2|P138-TOX|TDH6|THOX2	dual oxidase 2	protein-coding
siCtrl_G9a_GST_peak_1840	chr12	68603070	68603543	+	146	NA	intron (NM_018402, intron 3 of 4)	LTR14B|LTR|ERVK	16284	NM_018402	55801	Hs.272350	NM_018402	ENSG00000111536	IL26	AK155|IL-26	interleukin 26	protein-coding
siCtrl_G9a_GST_peak_4449	chr21	46575949	46576340	+	146	NA	intron (NM_001346687, intron 1 of 11)	HAL1-2a_MD|LINE|L1	3699	NM_001346687	104	Hs.474018	NM_001112	ENSG00000197381	ADARB1	ADAR2|DRABA2|DRADA2|RED1	adenosine deaminase RNA specific B1	protein-coding
siCtrl_G9a_GST_peak_3603	chr2	38011676	38011979	+	146	NA	Intergenic	Intergenic	45027	NR_110011	101929559	Hs.468200	NR_110011	ENSG00000237803	LINC00211	NCRNA00211	long intergenic non-protein coding RNA 211	ncRNA
siCtrl_G9a_GST_peak_2567	chr15	58854372	58854569	+	146	NA	intron (NM_000236, intron 7 of 8)	intron (NM_000236, intron 7 of 8)	-63536	NR_120338	101928694	Hs.655781	NR_120338	ENSG00000259293	LIPC-AS1	-	LIPC antisense RNA 1	ncRNA
siCtrl_G9a_GST_peak_2709	chr15	89399482	89399864	+	146	NA	exon (NM_013227, exon 12 of 18)	exon (NM_013227, exon 12 of 18)	39102	NM_001307952	145864	Hs.447530	NM_178232	ENSG00000140511	HAPLN3	EXLD1|HsT19883	hyaluronan and proteoglycan link protein 3	protein-coding
siCtrl_G9a_GST_peak_6492	chr7	135507196	135507436	+	146	NA	Intergenic	Intergenic	-73755	NM_205855	389558	Hs.55200	NM_205855	ENSG00000189320	FAM180A	UNQ1940	family with sequence similarity 180 member A	protein-coding
siCtrl_G9a_GST_peak_1006	chr1	234836272	234836387	+	146	NA	Intergenic	Intergenic	-23460	NR_038856	100506810	Hs.586634	NR_038856	ENSG00000227630	LINC01132	-	long intergenic non-protein coding RNA 1132	ncRNA
siCtrl_G9a_GST_peak_898	chr1	219761295	219761500	+	145	NA	Intergenic	L3|LINE|CR1	25090	NM_001355457	643136	Hs.647764	NM_001085394	ENSG00000215817	ZC3H11B	ZC3HDC11B	zinc finger CCCH-type containing 11B	protein-coding
siCtrl_G9a_GST_peak_5476	chr5	168305268	168305529	+	145	NA	intron (NM_001271946, intron 5 of 35)	intron (NM_001271946, intron 5 of 35)	-110138	NR_029632	407001		NR_029632	ENSG00000207739	MIR218-2	MIRN218-2|mir-218-2	microRNA 218-2	ncRNA
siCtrl_G9a_GST_peak_5589	chr6	19554951	19555242	+	145	NA	Intergenic	MER130|Unknown?|Unknown?	105044	NR_134615	105374960	Hs.519913	NR_134615		LOC105374960	-	uncharacterized LOC105374960	ncRNA
siCtrl_G9a_GST_peak_2660	chr15	82044989	82045719	+	145	NA	Intergenic	Intergenic	293005	NM_032246	84206	Hs.104744	NM_032246	ENSG00000183496	MEX3B	MEX-3B|RKHD3|RNF195	mex-3 RNA binding family member B	protein-coding
siCtrl_G9a_GST_peak_3200	chr17	69434760	69435304	+	145	NA	Intergenic	Intergenic	-236712	NR_104152	101928165	Hs.407613	NR_104152	ENSG00000260785	CASC17	LINC00600	cancer susceptibility 17	ncRNA
siCtrl_G9a_GST_peak_6376	chr7	92384086	92384558	+	145	NA	intron (NM_001145306, intron 3 of 7)	intron (NM_001145306, intron 3 of 7)	78951	NM_001259	1021	Hs.119882	NM_001259	ENSG00000105810	CDK6	MCPH12|PLSTIRE	cyclin dependent kinase 6	protein-coding
siCtrl_G9a_GST_peak_1471	chr11	77742876	77742988	+	144	NA	intron (NM_001203261, intron 2 of 2)	intron (NM_001203261, intron 2 of 2)	-8610	NM_023930	65987	Hs.709780	NM_023930	ENSG00000151364	KCTD14	-	potassium channel tetramerization domain containing 14	protein-coding
siCtrl_G9a_GST_peak_934	chr1	221448013	221448179	+	144	NA	Intergenic	Intergenic	61542	NR_024236	400804	Hs.722626	NR_024236	ENSG00000234754	C1orf140	-	uncharacterized LOC400804	ncRNA
siCtrl_G9a_GST_peak_2508	chr15	47961660	47962345	+	144	NA	intron (NM_001198999, intron 4 of 19)	intron (NM_001198999, intron 4 of 19)	-47700	NM_001358351	80031	Hs.511265	NM_020858	ENSG00000137872	SEMA6D	-	semaphorin 6D	protein-coding
siCtrl_G9a_GST_peak_6279	chr7	50266405	50266575	+	144	NA	Intergenic	Intergenic	-77170	NM_001291839	10320	Hs.435949	NM_006060	ENSG00000185811	IKZF1	CVID13|Hs.54452|IK1|IKAROS|LYF1|LyF-1|PPP1R92|PRO0758|ZNFN1A1	IKAROS family zinc finger 1	protein-coding
siCtrl_G9a_GST_peak_1863	chr12	75922203	75922640	+	144	NA	Intergenic	MLT1G|LTR|ERVL-MaLR	-17032	NM_007043	11103	Hs.645517	NM_007043	ENSG00000111615	KRR1	HRB2|RIP-1	KRR1 small subunit processome component homolog	protein-coding
siCtrl_G9a_GST_peak_3813	chr2	74803407	74803846	+	144	NA	exon (NM_138804, exon 6 of 11)	exon (NM_138804, exon 6 of 11)	22339	NM_001318869	1796	Hs.103854	NM_001381	ENSG00000115325	DOK1	P62DOK|pp62	docking protein 1	protein-coding
siCtrl_G9a_GST_peak_1113	chr10	34616211	34616434	+	144	NA	intron (NM_001184791, intron 16 of 20)	intron (NM_001184791, intron 16 of 20)	487902	NM_001184794	56288	Hs.131489	NM_019619	ENSG00000148498	PARD3	ASIP|Baz|PAR3|PAR3alpha|PARD-3|PARD3A|PPP1R118|SE2-5L16|SE2-5LT1|SE2-5T2	par-3 family cell polarity regulator	protein-coding
siCtrl_G9a_GST_peak_471	chr1	118323295	118323667	+	144	NA	Intergenic	MSTD|LTR|ERVL-MaLR	148763	NM_017686	54834	Hs.310809	NM_017686	ENSG00000196505	GDAP2	MACROD3|SCAR27	ganglioside induced differentiation associated protein 2	protein-coding
siCtrl_G9a_GST_peak_1564	chr11	133617685	133617750	+	143	NA	Intergenic	Intergenic	62554	NR_120444	646522	Hs.560000	NR_120444	ENSG00000255258	LINC02743	-	long intergenic non-protein coding RNA 2743	ncRNA
siCtrl_G9a_GST_peak_854	chr1	213224128	213224650	+	143	NA	promoter-TSS (NM_001287218)	promoter-TSS (NM_001287218)	-186	NM_001349672	26750	Hs.591416	NM_012424	ENSG00000136643	RPS6KC1	RPK118|RSKL1|S6K-delta-1|S6PKh1|humS6PKh1	ribosomal protein S6 kinase C1	protein-coding
siCtrl_G9a_GST_peak_359	chr1	99930998	99931081	+	143	NA	Intergenic	L3|LINE|CR1	22321	NR_125951	101928270	Hs.576048	NR_125951	ENSG00000224445	LINC01708	-	long intergenic non-protein coding RNA 1708	ncRNA
siCtrl_G9a_GST_peak_1247	chr10	97889457	97889882	+	143	NA	promoter-TSS (NM_001330738)	promoter-TSS (NM_001330738)	-144	NM_001330732	9849	Hs.600823	NM_014803	ENSG00000177853	ZNF518A	ZNF518	zinc finger protein 518A	protein-coding
siCtrl_G9a_GST_peak_2207	chr13	51574608	51574771	+	143	NA	intron (NR_003923, intron 16 of 16)	intron (NR_003923, intron 16 of 16)	65604	NR_003923	2974	Hs.411573	NM_004129	ENSG00000123201	GUCY1B2	GC-SB2	guanylate cyclase 1 soluble subunit beta 2 (pseudogene)	pseudo
siCtrl_G9a_GST_peak_442	chr1	116907975	116908163	+	143	NA	Intergenic	Intergenic	-7797	NM_000701	476	Hs.371889	NM_000701	ENSG00000163399	ATP1A1	CMT2DD|HOMGSMR2	ATPase Na+/K+ transporting subunit alpha 1	protein-coding
siCtrl_G9a_GST_peak_6775	chr8	97945260	97945617	+	142	NA	intron (NM_016134, intron 4 of 7)	intron (NM_016134, intron 4 of 7)	287968	NM_016134	10404	Hs.156178	NM_016134	ENSG00000104324	CPQ	LDP|PGCP	carboxypeptidase Q	protein-coding
siCtrl_G9a_GST_peak_380	chr1	107869820	107869938	+	142	NA	intron (NM_001113226, intron 2 of 6)	intron (NM_001113226, intron 2 of 6)	179188	NM_001113228	22854	Hs.133046	NM_014917	ENSG00000162631	NTNG1	Lmnt1	netrin G1	protein-coding
siCtrl_G9a_GST_peak_4174	chr2	223858845	223859246	+	142	NA	Intergenic	Intergenic	-57603	NM_080671	23704	Hs.348522	NM_080671	ENSG00000152049	KCNE4	MIRP3	potassium voltage-gated channel subfamily E regulatory subunit 4	protein-coding
siCtrl_G9a_GST_peak_6452	chr7	131730315	131730773	+	142	NA	Intergenic	Intergenic	135565	NR_110836	101928782	Hs.571369	NR_110836	ENSG00000224865	LOC101928782	-	uncharacterized LOC101928782	ncRNA
siCtrl_G9a_GST_peak_927	chr1	221203125	221203315	+	142	NA	Intergenic	Intergenic	-149738	NR_046901	100873924	Hs.645593	NR_046901	ENSG00000257551	HLX-AS1	-	HLX antisense RNA 1	ncRNA
siCtrl_G9a_GST_peak_6854	chr8	139754956	139755036	+	142	NA	intron (NM_152888, intron 22 of 64)	HAL1-2a_MD|LINE|L1	171288	NM_152888	169044	Hs.117169	NM_152888	ENSG00000169436	COL22A1	-	collagen type XXII alpha 1 chain	protein-coding
siCtrl_G9a_GST_peak_1829	chr12	68152191	68152567	+	142	NA	Intergenic	Intergenic	-29124	NR_110063	101927901	Hs.369609	NR_110063	ENSG00000255970	LINC02421	-	long intergenic non-protein coding RNA 2421	ncRNA
siCtrl_G9a_GST_peak_6066	chr6	163046042	163046565	+	142	NA	intron (NM_013987, intron 1 of 10)	MLT1I|LTR|ERVL-MaLR	-101861	NM_152410	135138	Hs.25791	NM_152410	ENSG00000112530	PACRG	GLUP|HAK005771|PACRG2.1|PARK2CRG	parkin coregulated	protein-coding
siCtrl_G9a_GST_peak_1029	chr1	239155504	239155801	+	142	NA	Intergenic	Intergenic	-394216	NM_001347716	1131	Hs.7138	NM_000740	ENSG00000133019	CHRM3	EGBRS|HM3|PBS	cholinergic receptor muscarinic 3	protein-coding
siCtrl_G9a_GST_peak_1944	chr12	97651539	97651903	+	142	NA	Intergenic	MLT1G1|LTR|ERVL-MaLR	-204833	NR_152618	196475	Hs.652568	NR_024037	ENSG00000255794	RMST	LINC00054|NCRMS|NCRNA00054	rhabdomyosarcoma 2 associated transcript	ncRNA
siCtrl_G9a_GST_peak_3882	chr2	98060606	98060734	+	142	NA	Intergenic	Intergenic	28950	NR_103733	100506076	Hs.732616	NR_103732		LOC100506076	-	uncharacterized LOC100506076	ncRNA
siCtrl_G9a_GST_peak_576	chr1	147646884	147647168	+	142	NA	intron (NM_001351365, intron 71 of 94)	MLT1H1|LTR|ERVL-MaLR	12037	NR_135559	100505824	Hs.488388	NR_135559	ENSG00000232265	LINC02805	-	long intergenic non-protein coding RNA 2805	ncRNA
siCtrl_G9a_GST_peak_2994	chr17	37844252	37844744	+	142	NA	promoter-TSS (NM_033419)	promoter-TSS (NM_033419)	161	NM_001289936	2064	Hs.446352	NM_004448	ENSG00000141736	ERBB2	CD340|HER-2|HER-2/neu|HER2|MLN 19|NEU|NGL|TKR1	erb-b2 receptor tyrosine kinase 2	protein-coding
siCtrl_G9a_GST_peak_1500	chr11	95825210	95825272	+	142	NA	exon (NM_032427, exon 2 of 5)	exon (NM_032427, exon 2 of 5)	-167870	NM_016156	8898	Hs.181326	NM_016156	ENSG00000087053	MTMR2	CMT4B|CMT4B1	myotubularin related protein 2	protein-coding
siCtrl_G9a_GST_peak_6680	chr8	50258650	50258754	+	142	NA	Intergenic	LTR40b|LTR|ERVL	166037	NR_134294	100507464	Hs.245745	NR_134294	ENSG00000253380	LOC100507464	-	uncharacterized LOC100507464	ncRNA
siCtrl_G9a_GST_peak_5965	chr6	136847784	136847951	+	142	NA	promoter-TSS (NM_001198619)	promoter-TSS (NM_001198619)	-19	NM_001198619	9053	Hs.486548	NM_003980	ENSG00000135525	MAP7	E-MAP-115|EMAP115	microtubule associated protein 7	protein-coding
siCtrl_G9a_GST_peak_2147	chr13	34491481	34491846	+	142	NA	intron (NM_181558, intron 8 of 8)	intron (NM_181558, intron 8 of 8)	99377	NM_002915	5983	Hs.115474	NM_002915	ENSG00000133119	RFC3	RFC38	replication factor C subunit 3	protein-coding
siCtrl_G9a_GST_peak_4249	chr20	15815509	15815801	+	142	NA	intron (NM_001351661, intron 8 of 17)	MLT1F|LTR|ERVL-MaLR	88304	NR_130925	613266	Hs.309149	NR_130924		LOC613266	-	uncharacterized LOC613266	ncRNA
siCtrl_G9a_GST_peak_4252	chr20	15827198	15827494	+	142	NA	intron (NM_001351661, intron 8 of 17)	intron (NM_001351661, intron 8 of 17)	76613	NR_130925	613266	Hs.309149	NR_130924		LOC613266	-	uncharacterized LOC613266	ncRNA
siCtrl_G9a_GST_peak_4234	chr20	9980374	9980748	+	142	NA	intron (NR_109861, intron 1 of 1)	MLT1H|LTR|ERVL-MaLR	13580	NR_109861	101929371	Hs.619265	NR_109861		PARAL1	-	PPARG activating RBM14 associated lncRNA 1	ncRNA
siCtrl_G9a_GST_peak_4522	chr22	28450542	28450615	+	142	NA	intron (NM_001145418, intron 12 of 22)	intron (NM_001145418, intron 12 of 22)	-133978	NR_036169	100423034		NR_036169	ENSG00000264073	MIR3199-1	mir-3199-1	microRNA 3199-1	ncRNA
siCtrl_G9a_GST_peak_6251	chr7	41927533	41927645	+	142	NA	Intergenic	Intergenic	-184901	NM_002192	3624	Hs.28792	NM_002192	ENSG00000122641	INHBA	EDF|FRP	inhibin subunit beta A	protein-coding
siCtrl_G9a_GST_peak_6333	chr7	69790956	69791073	+	142	NA	intron (NM_015570, intron 4 of 18)	intron (NM_015570, intron 4 of 18)	727553	NM_001127231	26053	Hs.21631	NM_015570	ENSG00000158321	AUTS2	FBRSL2|MRD26	activator of transcription and developmental regulator AUTS2	protein-coding
siCtrl_G9a_GST_peak_7299	chrX	138137026	138137086	+	142	NA	intron (NM_001139501, intron 2 of 7)	L1PB1|LINE|L1	150129	NM_001139501	2258	Hs.6540	NM_004114	ENSG00000129682	FGF13	FGF-13|FGF2|FHF-2|FHF2|LINC00889	fibroblast growth factor 13	protein-coding
siCtrl_G9a_GST_peak_4918	chr4	26579752	26579882	+	142	NA	Intergenic	Intergenic	-5729	NM_001292054	55296	Hs.479403	NM_018317	ENSG00000109680	TBC1D19	-	TBC1 domain family member 19	protein-coding
siCtrl_G9a_GST_peak_2440	chr15	30506327	30506450	+	142	NA	non-coding (NR_026771, exon 3 of 3)	non-coding (NR_026771, exon 3 of 3)	18149	NR_026771	26082	Hs.652128	NR_026771	ENSG00000225930	LINC02249	DKFZP434L187	long intergenic non-protein coding RNA 2249	ncRNA
siCtrl_G9a_GST_peak_4254	chr20	15834849	15835214	+	142	NA	intron (NM_001351661, intron 8 of 17)	MLT1E1A|LTR|ERVL-MaLR	68928	NR_130925	613266	Hs.309149	NR_130924		LOC613266	-	uncharacterized LOC613266	ncRNA
siCtrl_G9a_GST_peak_187	chr1	64576991	64577326	+	142	NA	intron (NR_110666, intron 1 of 5)	intron (NR_110666, intron 1 of 5)	730	NR_110666	101927034	Hs.680824	NR_110665	ENSG00000223949	ROR1-AS1	-	ROR1 antisense RNA 1	ncRNA
siCtrl_G9a_GST_peak_4084	chr2	202861576	202861858	+	142	NA	Intergenic	Intergenic	-37593	NM_003507	8324	Hs.173859	NM_003507	ENSG00000155760	FZD7	FzE3	frizzled class receptor 7	protein-coding
siCtrl_G9a_GST_peak_3713	chr2	50978658	50978915	+	142	NA	intron (NM_004801, intron 4 of 21)	intron (NM_004801, intron 4 of 21)	-55386	NR_130470	103504737		NR_130470	ENSG00000216191	MIR8485	hsa-mir-8485	microRNA 8485	ncRNA
siCtrl_G9a_GST_peak_7117	chr9	120116574	120116641	+	142	NA	intron (NM_014010, intron 1 of 21)	L2c|LINE|L2	60728	NM_001365069	23245	Hs.601562	NM_014010	ENSG00000148219	ASTN2	bA67K19.1	astrotactin 2	protein-coding
siCtrl_G9a_GST_peak_166	chr1	62034639	62035050	+	142	NA	Intergenic	Intergenic	-85070	NR_073400	414927	Hs.123471	NR_073400		MGC34796	-	sepiapterin reductase (7,8-dihydrobiopterin:NADP+ oxidoreductase) pseudogene	pseudo
siCtrl_G9a_GST_peak_2909	chr17	967605	967797	+	142	NA	intron (NM_001092, intron 9 of 21)	intron (NM_001092, intron 9 of 21)	14532	NM_001282149	29	Hs.159306	NM_001092	ENSG00000159842	ABR	MDB	ABR activator of RhoGEF and GTPase	protein-coding
siCtrl_G9a_GST_peak_5973	chr6	140248691	140248775	+	142	NA	Intergenic	Intergenic	-48723	NR_121623	100507477	Hs.179213	NR_121622	ENSG00000236013	LOC100507477	-	uncharacterized LOC100507477	ncRNA
siCtrl_G9a_GST_peak_6408	chr7	108363877	108364213	+	142	NA	Intergenic	LFSINE_Vert|SINE|SINE	153727	NM_012328	4189	Hs.732494	NM_012328	ENSG00000128590	DNAJB9	ERdj4|MDG-1|MDG1|MST049|MSTP049	DnaJ heat shock protein family (Hsp40) member B9	protein-coding
siCtrl_G9a_GST_peak_4069	chr2	192799968	192800286	+	142	NA	Intergenic	Intergenic	-88313	NM_004657	8436	Hs.26530	NM_004657	ENSG00000168497	CAVIN2	PS-p68|SDPR|SDR|cavin-2	caveolae associated protein 2	protein-coding
siCtrl_G9a_GST_peak_1739	chr12	50258219	50258316	+	142	NA	Intergenic	MLT1G|LTR|ERVL-MaLR	-21378	NM_181708	144233	Hs.142736	NM_181708	ENSG00000186666	BCDIN3D	-	BCDIN3 domain containing RNA methyltransferase	protein-coding
siCtrl_G9a_GST_peak_4548	chr3	123569	123782	+	142	NA	Intergenic	Intergenic	58244	NR_110824	102723448	Hs.543290	NR_110824		LINC01986	-	long intergenic non-protein coding RNA 1986	ncRNA
siCtrl_G9a_GST_peak_4779	chr3	123877323	123877833	+	142	NA	intron (NM_001024660, intron 1 of 59)	intron (NM_001024660, intron 1 of 59)	25802	NR_049798	100847021		NR_049798	ENSG00000266383	MIR5002	-	microRNA 5002	ncRNA
siCtrl_G9a_GST_peak_5211	chr5	18069064	18069202	+	142	NA	Intergenic	Intergenic	261750	NR_134286	646241	Hs.407197	NR_134286		LINC02223	-	long intergenic non-protein coding RNA 2223	ncRNA
siCtrl_G9a_GST_peak_5799	chr6	99579174	99579416	+	142	NA	Intergenic	Intergenic	6810	NR_039672	100616347		NR_039672	ENSG00000265226	MIR548AI	-	microRNA 548ai	ncRNA
siCtrl_G9a_GST_peak_3861	chr2	86506500	86506852	+	142	NA	intron (NM_001164731, intron 1 of 5)	MLT1D|LTR|ERVL-MaLR	58073	NM_001371280
siCtrl_G9a_GST_peak_4846	chr3	166706355	166706606	+	142	NA	Intergenic	HERVL-int|LTR|ERVL	90009	NR_135545	105374194		NR_135545		LOC105374194	inv3q26.1	uncharacterized LOC105374194	ncRNA
siCtrl_G9a_GST_peak_1694	chr12	32355094	32355188	+	142	NA	intron (NR_148725, intron 1 of 9)	intron (NR_148725, intron 1 of 9)	95360	NM_001354188	636	Hs.505202	NM_001714	ENSG00000151746	BICD1	BICD|bic-D 1	BICD cargo adaptor 1	protein-coding
siCtrl_G9a_GST_peak_5073	chr4	119346609	119346840	+	142	NA	Intergenic	Intergenic	-72566	NM_003619	8492	Hs.445857	NM_003619	ENSG00000164099	PRSS12	BSSP-3|BSSP3|MRT1	serine protease 12	protein-coding
siCtrl_G9a_GST_peak_2137	chr13	29958718	29959132	+	142	NA	intron (NM_001366650, intron 8 of 15)	intron (NM_001366650, intron 8 of 15)	-43872	NM_015233	23281	Hs.22287	NM_015233	ENSG00000132938	MTUS2	CAZIP|ICIS|KIAA0774|TIP150	microtubule associated scaffold protein 2	protein-coding
siCtrl_G9a_GST_peak_3986	chr2	146522299	146522509	+	142	NA	Intergenic	Intergenic	-822221	NR_026904	728773	Hs.334462	NR_026904		PABPC1P2	PABP2|PABP4|PABPCP2|PABPCP4	poly(A) binding protein cytoplasmic 1 pseudogene 2	pseudo
siCtrl_G9a_GST_peak_6210	chr7	34812284	34812697	+	142	NA	intron (NR_015356, intron 1 of 4)	ERV3-16A3_I-int|LTR|ERVL	-14606	NR_033665	404744	Hs.487951	NM_207283	ENSG00000197085	NPSR1-AS1	AAA1	NPSR1 antisense RNA 1	ncRNA
siCtrl_G9a_GST_peak_5426	chr5	145986563	145986729	+	142	NA	intron (NM_001271948, intron 7 of 9)	intron (NM_001271948, intron 7 of 9)	-90970	NM_194251	134391	Hs.483732	NM_194251	ENSG00000173250	GPR151	GALR4|GALRL|GPCR|GPCR-2037|PGR7	G protein-coupled receptor 151	protein-coding
siCtrl_G9a_GST_peak_2753	chr15	98143087	98143627	+	142	NA	Intergenic	Intergenic	-39429	NR_110756	101927310	Hs.560324	NR_110756	ENSG00000259582	LOC101927310	-	uncharacterized LOC101927310	ncRNA
siCtrl_G9a_GST_peak_6611	chr8	29743512	29743893	+	142	NA	Intergenic	Intergenic	-35327	NR_024473	286135	Hs.376840	NR_024473	ENSG00000253279	LINC02209	FAM183CP	long intergenic non-protein coding RNA 2209	ncRNA
siCtrl_G9a_GST_peak_6906	chr9	17065235	17065302	+	142	NA	Intergenic	Intergenic	-69770	NM_001286985	54875	Hs.435381	NM_017738	ENSG00000044459	CNTLN	C9orf101|C9orf39|bA340N12.1	centlein	protein-coding
siCtrl_G9a_GST_peak_3077	chr17	53573511	53573786	+	142	NA	Intergenic	Intergenic	-74452	NM_012329	23531	Hs.463483	NM_012329	ENSG00000108960	MMD	MMA|MMD1|PAQR11	monocyte to macrophage differentiation associated	protein-coding
siCtrl_G9a_GST_peak_4361	chr20	51415596	51416104	+	142	NA	Intergenic	Intergenic	-173047	NM_173485	128553	Hs.473117	NM_173485	ENSG00000182463	TSHZ2	C20orf17|OVC10-2|TSH2|ZABC2|ZNF218	teashirt zinc finger homeobox 2	protein-coding
siCtrl_G9a_GST_peak_4366	chr20	51511759	51512120	+	142	NA	Intergenic	Intergenic	-76958	NM_173485	128553	Hs.473117	NM_173485	ENSG00000182463	TSHZ2	C20orf17|OVC10-2|TSH2|ZABC2|ZNF218	teashirt zinc finger homeobox 2	protein-coding
siCtrl_G9a_GST_peak_876	chr1	216794861	216795201	+	142	NA	intron (NM_001243505, intron 3 of 6)	intron (NM_001243505, intron 3 of 6)	101740	NM_001243515	2104	Hs.444225	NM_001438	ENSG00000196482	ESRRG	ERR-gamma|ERR3|ERRg|ERRgamma|NR3B3	estrogen related receptor gamma	protein-coding
siCtrl_G9a_GST_peak_10	chr1	579845	579910	+	142	NA	Intergenic	Intergenic	-11812	NR_162149	113219467		NR_162149		MIR12136	-	microRNA 12136	ncRNA
siCtrl_G9a_GST_peak_5119	chr4	166463249	166463541	+	142	NA	Intergenic	Intergenic	-142396	NR_121676	101928151	Hs.639858	NR_121676	ENSG00000249500	LINC01179	-	long intergenic non-protein coding RNA 1179	ncRNA
siCtrl_G9a_GST_peak_6925	chr9	31774345	31774530	+	142	NA	Intergenic	HERVK11-int|LTR|ERVK	-392949	NR_135134	101929620	Hs.547175	NR_135134	ENSG00000260720	LINC01243	-	long intergenic non-protein coding RNA 1243	ncRNA
siCtrl_G9a_GST_peak_2825	chr16	27931235	27931317	+	142	NA	intron (NM_001109763, intron 2 of 6)	intron (NM_001109763, intron 2 of 6)	-31798	NM_144675	146395	Hs.91910	NM_144675	ENSG00000169181	GSG1L	PRO19651	GSG1 like	protein-coding
siCtrl_G9a_GST_peak_379	chr1	107869628	107869730	+	142	NA	intron (NM_001113226, intron 2 of 6)	intron (NM_001113226, intron 2 of 6)	178988	NM_001113228	22854	Hs.133046	NM_014917	ENSG00000162631	NTNG1	Lmnt1	netrin G1	protein-coding
siCtrl_G9a_GST_peak_5257	chr5	58069584	58069898	+	142	NA	intron (NM_138453, intron 3 of 4)	L2c|LINE|L2	190839	NM_138453	115827	Hs.4290	NM_138453	ENSG00000152932	RAB3C	-	RAB3C, member RAS oncogene family	protein-coding
siCtrl_G9a_GST_peak_73	chr1	56240478	56241043	+	142	NA	Intergenic	Intergenic	169876	NR_147162	105378739	Hs.98895	NR_147162	ENSG00000230250	LINC01753	-	long intergenic non-protein coding RNA 1753	ncRNA
siCtrl_G9a_GST_peak_2146	chr13	32738720	32739035	+	142	NA	intron (NM_023037, intron 17 of 60)	intron (NM_023037, intron 17 of 60)	132966	NM_023037	10129	Hs.507669	NM_023037	ENSG00000073910	FRY	13CDNA73|214K23.2|C13orf14|CG003|bA207N4.2|bA37E23.1	FRY microtubule binding protein	protein-coding
siCtrl_G9a_GST_peak_5548	chr6	10887985	10888066	+	142	NA	intron (NM_001040274, intron 1 of 29)	intron (NM_001040274, intron 1 of 29)	740	NM_001040274	221711	Hs.729128	NM_194299	ENSG00000153157	SYCP2L	C6orf177|NO145|dJ62D2.1	synaptonemal complex protein 2 like	protein-coding
siCtrl_G9a_GST_peak_4485	chr22	18858880	18858953	+	142	NA	intron (NR_160772, intron 1 of 3)	intron (NR_160772, intron 1 of 3)	901	NR_160772	107987389		NR_160771		LOC107987389	-	family with sequence similarity 230-like	ncRNA
siCtrl_G9a_GST_peak_3305	chr18	35878033	35878097	+	142	NA	Intergenic	Intergenic	640967	NR_036202	100422857		NR_036202	ENSG00000266530	MIR4318	-	microRNA 4318	ncRNA
siCtrl_G9a_GST_peak_5025	chr4	79000827	79001282	+	142	NA	intron (NM_025074, intron 2 of 73)	intron (NM_025074, intron 2 of 73)	22330	NM_001166133	80144	Hs.369448	NM_020875	ENSG00000138759	FRAS1	FRASRS1	Fraser extracellular matrix complex subunit 1	protein-coding
siCtrl_G9a_GST_peak_2467	chr15	40615562	40615900	+	142	NA	promoter-TSS (NM_001301268)	promoter-TSS (NM_001301268)	-162	NM_001301268	100505573	Hs.530791	NM_001301268	ENSG00000259330	INAFM2	LINC00984|OGU1	InaF motif containing 2	protein-coding
siCtrl_G9a_GST_peak_5319	chr5	76629762	76629848	+	142	NA	intron (NM_001029852, intron 5 of 20)	intron (NM_001029852, intron 5 of 20)	123300	NM_001029854	8622	Hs.584830	NM_003719	ENSG00000113231	PDE8B	ADSD|PPNAD3	phosphodiesterase 8B	protein-coding
siCtrl_G9a_GST_peak_6142	chr7	25470101	25470413	+	142	NA	Intergenic	Intergenic	-202152	NM_022150	64111	Hs.60473	NM_022150	ENSG00000105954	NPVF	C7orf9|RFRP	neuropeptide VF precursor	protein-coding
siCtrl_G9a_GST_peak_5194	chr5	15601287	15601620	+	142	NA	TTS (NR_109945)	TTS (NR_109945)	13658	NR_109945	101929472	Hs.662664	NR_109945		CTD-2350J17.1	-	uncharacterized LOC101929472	ncRNA
siCtrl_G9a_GST_peak_1859	chr12	72340684	72340801	+	142	NA	intron (NM_173353, intron 4 of 10)	MER5A1|DNA|hAT-Charlie	8117	NM_173353	121278	Hs.736576	NM_173353	ENSG00000139287	TPH2	ADHD7|NTPH	tryptophan hydroxylase 2	protein-coding
siCtrl_G9a_GST_peak_4410	chr21	16248980	16249081	+	142	NA	intron (NR_146322, intron 1 of 3)	intron (NR_146322, intron 1 of 3)	41959	NR_146322	107987295		NR_146322		LINC02246	-	long intergenic non-protein coding RNA 2246	ncRNA
siCtrl_G9a_GST_peak_3321	chr18	42792861	42792983	+	142	NA	promoter-TSS (NM_001242692)	promoter-TSS (NM_001242692)	-38	NM_001242692	8170	Hs.710927	NM_007163	ENSG00000132874	SLC14A2	HUT2|UT-A2|UT2|UTA|UTR|hUT-A6	solute carrier family 14 member 2	protein-coding
siCtrl_G9a_GST_peak_2750	chr15	98140503	98140958	+	142	NA	Intergenic	Intergenic	-36802	NR_110756	101927310	Hs.560324	NR_110756	ENSG00000259582	LOC101927310	-	uncharacterized LOC101927310	ncRNA
siCtrl_G9a_GST_peak_1728	chr12	43614192	43614298	+	141	NA	Intergenic	Intergenic	65127	NR_146866	105369740	Hs.577746	NR_146866	ENSG00000258331	LINC02461	-	long intergenic non-protein coding RNA 2461	ncRNA
siCtrl_G9a_GST_peak_2323	chr14	36789953	36790018	+	141	NA	promoter-TSS (NM_001308110)	promoter-TSS (NM_001308110)	-103	NM_001144891	51562	Hs.368647	NM_016586	ENSG00000151332	MBIP	-	MAP3K12 binding inhibitory protein 1	protein-coding
siCtrl_G9a_GST_peak_678	chr1	175542804	175543232	+	141	NA	intron (NM_001328635, intron 1 of 22)	intron (NM_001328635, intron 1 of 22)	169713	NM_001328635	7143	Hs.659864	NM_003285	ENSG00000116147	TNR	TN-R	tenascin R	protein-coding
siCtrl_G9a_GST_peak_1128	chr10	42611221	42611367	+	141	NA	Intergenic	Intergenic	252199	NR_024380	441666	Hs.255729	NR_024380	ENSG00000215146	LOC441666	-	zinc finger protein 91 pseudogene	pseudo
siCtrl_G9a_GST_peak_3730	chr2	56354605	56354966	+	141	NA	Intergenic	Intergenic	-37268	NR_135590	101927165	Hs.679803	NR_135590		LINC01813	-	long intergenic non-protein coding RNA 1813	ncRNA
siCtrl_G9a_GST_peak_4565	chr3	12033321	12033767	+	141	NA	Intergenic	LTR16C|LTR|ERVL	-12290	NM_003178	6854	Hs.445503	NM_003178	ENSG00000157152	SYN2	SYNII	synapsin II	protein-coding
siCtrl_G9a_GST_peak_3856	chr2	85125715	85126075	+	141	NA	Intergenic	MLT1F|LTR|ERVL-MaLR	-6885	NM_021103	9168	Hs.446574	NM_021103	ENSG00000034510	TMSB10	MIG12|TB10	thymosin beta 10	protein-coding
siCtrl_G9a_GST_peak_2228	chr13	72888335	72888673	+	140	NA	Intergenic	MER70B|LTR|ERVL	413263	NM_001071775	440145	Hs.28465	NM_001071775	ENSG00000204899	MZT1	C13orf37|MOZART1	mitotic spindle organizing protein 1	protein-coding
siCtrl_G9a_GST_peak_3458	chr2	5161523	5162199	+	140	NA	Intergenic	MER20|DNA|hAT-Charlie	-458049	NR_034134	727982	Hs.444391	NR_034134	ENSG00000231532	LINC01249	-	long intergenic non-protein coding RNA 1249	ncRNA
siCtrl_G9a_GST_peak_6157	chr7	28612283	28612518	+	140	NA	intron (NM_182898, intron 5 of 10)	intron (NM_182898, intron 5 of 10)	-113350	NM_001011666	9586	Hs.437075	NM_004904	ENSG00000146592	CREB5	CRE-BPA|CREB-5|CREBPA	cAMP responsive element binding protein 5	protein-coding
siCtrl_G9a_GST_peak_472	chr1	118323762	118324177	+	140	NA	Intergenic	Intergenic	148275	NM_017686	54834	Hs.310809	NM_017686	ENSG00000196505	GDAP2	MACROD3|SCAR27	ganglioside induced differentiation associated protein 2	protein-coding
siCtrl_G9a_GST_peak_3719	chr2	52613777	52613860	+	140	NA	intron (NR_135239, intron 2 of 2)	intron (NR_135239, intron 2 of 2)	16032	NR_135239	105374596		NR_135239	ENSG00000225444	LINC01867	-	long intergenic non-protein coding RNA 1867	ncRNA
siCtrl_G9a_GST_peak_4043	chr2	178072372	178072531	+	140	NA	Intergenic	THE1D|LTR|ERVL-MaLR	4688	NR_157853	105373759		NR_157853		LOC105373759	-	uncharacterized LOC105373759	ncRNA
siCtrl_G9a_GST_peak_4692	chr3	72324011	72324309	+	140	NA	Intergenic	Intergenic	123752	NR_038221	201617	Hs.382623	NR_038221	ENSG00000243083	LINC00870	-	long intergenic non-protein coding RNA 870	ncRNA
siCtrl_G9a_GST_peak_2760	chr15	101122641	101123046	+	140	NA	intron (NR_148018, intron 1 of 6)	intron (NR_148018, intron 1 of 6)	19546	NR_148019	55180	Hs.105633	NM_018148	ENSG00000140471	LINS1	LINS|MRT27|WINS1	lines homolog 1	protein-coding
siCtrl_G9a_GST_peak_2154	chr13	36384084	36384364	+	140	NA	intron (NM_001195416, intron 8 of 12)	intron (NM_001195416, intron 8 of 12)	45580	NM_001195430	9201	Hs.507755	NM_004734	ENSG00000133083	DCLK1	CL1|CLICK1|DCAMKL1|DCDC3A|DCLK	doublecortin like kinase 1	protein-coding
siCtrl_G9a_GST_peak_5733	chr6	70834841	70835341	+	140	NA	intron (NM_001858, intron 17 of 50)	intron (NM_001858, intron 17 of 50)	157809	NM_078485	1297	Hs.590892	NM_001851	ENSG00000112280	COL9A1	DJ149L1.1.2|EDM6|MED|STL4	collagen type IX alpha 1 chain	protein-coding
siCtrl_G9a_GST_peak_393	chr1	108547633	108547797	+	140	NA	Intergenic	Intergenic	-39913	NM_006113	10451	Hs.267659	NM_006113	ENSG00000134215	VAV3	-	vav guanine nucleotide exchange factor 3	protein-coding
siCtrl_G9a_GST_peak_3560	chr2	26935811	26936110	+	140	NA	intron (NM_002246, intron 1 of 1)	intron (NM_002246, intron 1 of 1)	20370	NM_002246	3777	Hs.24040	NM_002246	ENSG00000171303	KCNK3	K2p3.1|OAT1|PPH4|TASK|TASK-1|TBAK1	potassium two pore domain channel subfamily K member 3	protein-coding
siCtrl_G9a_GST_peak_2632	chr15	73182552	73182760	+	140	NA	Intergenic	Intergenic	-106557	NM_001365227	83440	Hs.562587	NM_031284	ENSG00000159322	ADPGK	2610017G09Rik|ADP-GK	ADP dependent glucokinase	protein-coding
siCtrl_G9a_GST_peak_963	chr1	228916829	228916919	+	140	NA	Intergenic	Intergenic	45648	NM_021205	58480	Hs.647774	NM_021205	ENSG00000116574	RHOU	ARHU|CDC42L1|G28K|WRCH1|hG28K	ras homolog family member U	protein-coding
siCtrl_G9a_GST_peak_5884	chr6	116223166	116223298	+	139	NA	Intergenic	Intergenic	-136662	NR_027338	728402	Hs.729953	NR_027338		TPI1P3	-	triosephosphate isomerase 1 pseudogene 3	pseudo
siCtrl_G9a_GST_peak_5731	chr6	70294934	70295206	+	139	NA	Intergenic	Intergenic	211288	NM_001363722	55788	Hs.271643	NM_018368	ENSG00000168216	LMBRD1	C6orf209|LMBD1|MAHCF|NESI	LMBR1 domain containing 1	protein-coding
siCtrl_G9a_GST_peak_3182	chr17	66442713	66442877	+	139	NA	intron (NM_001320772, intron 2 of 11)	intron (NM_001320772, intron 2 of 11)	10842	NM_017983	55062	Hs.463964	NM_017983	ENSG00000070540	WIPI1	ATG18|ATG18A|WIPI49	WD repeat domain, phosphoinositide interacting 1	protein-coding
siCtrl_G9a_GST_peak_3805	chr2	70851774	70851839	+	139	NA	Intergenic	HERVH-int|LTR|ERV1	-70848	NM_003236	7039	Hs.170009	NM_003236	ENSG00000163235	TGFA	TFGA	transforming growth factor alpha	protein-coding
siCtrl_G9a_GST_peak_3770	chr2	66299086	66299191	+	139	NA	Intergenic	Intergenic	286322	NR_039938	100616464		NR_039938	ENSG00000264525	MIR4778	-	microRNA 4778	ncRNA
siCtrl_G9a_GST_peak_2596	chr15	68928930	68929263	+	139	NA	intron (NM_001190457, intron 1 of 11)	intron (NM_001190457, intron 1 of 11)	-4746	NM_001324015	10391	Hs.551213	NM_006091	ENSG00000103647	CORO2B	CLIPINC	coronin 2B	protein-coding
siCtrl_G9a_GST_peak_116	chr1	59969840	59970231	+	139	NA	intron (NM_001244714, intron 4 of 13)	MER21A|LTR|ERVL	-11267	NM_001278224	55277	Hs.444301	NM_018291	ENSG00000172456	FGGY	-	FGGY carbohydrate kinase domain containing	protein-coding
siCtrl_G9a_GST_peak_3807	chr2	70960048	70960151	+	138	NA	intron (NM_017488, intron 1 of 16)	intron (NM_017488, intron 1 of 16)	34748	NM_001185054	119	Hs.66187	NM_001617	ENSG00000075340	ADD2	ADDB	adducin 2	protein-coding
siCtrl_G9a_GST_peak_3142	chr17	59222726	59222853	+	138	NA	intron (NM_001353146, intron 23 of 25)	intron (NM_001353146, intron 23 of 25)	222276	NR_136397	101927855	Hs.662123	NR_136397	ENSG00000267131	LOC101927855	-	uncharacterized LOC101927855	ncRNA
siCtrl_G9a_GST_peak_1969	chr12	100295229	100295430	+	138	NA	intron (NM_001352188, intron 1 of 26)	MLT1K|LTR|ERVL-MaLR	83103	NM_001352188	56899	Hs.506458	NM_020140	ENSG00000185046	ANKS1B	AIDA|AIDA-1|ANKS2|EB-1|EB1|cajalin-2	ankyrin repeat and sterile alpha motif domain containing 1B	protein-coding
siCtrl_G9a_GST_peak_3199	chr17	69399274	69399356	+	138	NA	Intergenic	Intergenic	-200995	NR_104152	101928165	Hs.407613	NR_104152	ENSG00000260785	CASC17	LINC00600	cancer susceptibility 17	ncRNA
siCtrl_G9a_GST_peak_5626	chr6	26393522	26393867	+	138	NA	3' UTR (NM_181531, exon 7 of 7)	3' UTR (NM_181531, exon 7 of 7)	-8809	NM_001145008	11119	Hs.191510	NM_007048	ENSG00000026950	BTN3A1	BT3.1|BTF5|BTN3.1|CD277	butyrophilin subfamily 3 member A1	protein-coding
siCtrl_G9a_GST_peak_1636	chr12	23237619	23237891	+	138	NA	Intergenic	MLT1H|LTR|ERVL-MaLR	-90815	NR_120471	101928441	Hs.129111	NR_120471	ENSG00000256321	LOC101928441	-	uncharacterized LOC101928441	ncRNA
siCtrl_G9a_GST_peak_1022	chr1	237529504	237529670	+	138	NA	intron (NM_001035, intron 5 of 104)	intron (NM_001035, intron 5 of 104)	-104832	NR_039626	100616141		NR_039626	ENSG00000266262	MIR4428	-	microRNA 4428	ncRNA
siCtrl_G9a_GST_peak_5732	chr6	70332215	70332457	+	138	NA	Intergenic	LTR9|LTR|ERV1	174022	NM_001363722	55788	Hs.271643	NM_018368	ENSG00000168216	LMBRD1	C6orf209|LMBD1|MAHCF|NESI	LMBR1 domain containing 1	protein-coding
siCtrl_G9a_GST_peak_3710	chr2	50823783	50823951	+	138	NA	intron (NM_001330087, intron 4 of 16)	intron (NM_001330087, intron 4 of 16)	99533	NR_130470	103504737		NR_130470	ENSG00000216191	MIR8485	hsa-mir-8485	microRNA 8485	ncRNA
siCtrl_G9a_GST_peak_3519	chr2	17367135	17367390	+	138	NA	Intergenic	Intergenic	332445	NM_001099218	729475	Hs.515802	NM_001099218	ENSG00000214842	RAD51AP2	-	RAD51 associated protein 2	protein-coding
siCtrl_G9a_GST_peak_2069	chr12	124397581	124397813	+	138	NA	exon (NM_207437, exon 59 of 78)	exon (NM_207437, exon 59 of 78)	58909	NM_001304959	80212	Hs.114111	NM_025140	ENSG00000119242	CCDC92	-	coiled-coil domain containing 92	protein-coding
siCtrl_G9a_GST_peak_4378	chr20	53250544	53250747	+	138	NA	intron (NM_177959, intron 6 of 7)	intron (NM_177959, intron 6 of 7)	158513	NM_177959	55816	Hs.473133	NM_018431	ENSG00000101134	DOK5	C20orf180|IRS-6|IRS6	docking protein 5	protein-coding
siCtrl_G9a_GST_peak_387	chr1	108036326	108036638	+	138	NA	Intergenic	L2a|LINE|L2	194639	NM_001079874	10451	Hs.267659	NM_006113	ENSG00000134215	VAV3	-	vav guanine nucleotide exchange factor 3	protein-coding
siCtrl_G9a_GST_peak_1683	chr12	31014874	31015190	+	138	NA	Intergenic	Intergenic	-64650	NM_001370302	441631	Hs.505141	NM_001080509	ENSG00000110900	TSPAN11	VSSW1971	tetraspanin 11	protein-coding
siCtrl_G9a_GST_peak_6517	chr7	142125105	142125300	+	138	NA	Intergenic	Intergenic	32216	NR_162121	113839523		NR_162121		MIR11400	-	microRNA 11400	ncRNA
siCtrl_G9a_GST_peak_6753	chr8	93371673	93371774	+	138	NA	Intergenic	Intergenic	-256110	NM_175634	862	Hs.368431	NM_004349	ENSG00000079102	RUNX1T1	AML1-MTG8|AML1T1|CBFA2T1|CDR|ETO|MTG8|ZMYND2	RUNX1 partner transcriptional co-repressor 1	protein-coding
siCtrl_G9a_GST_peak_368	chr1	101756143	101756628	+	138	NA	Intergenic	Intergenic	-33008	NR_126402	104355286	Hs.568671	NR_126402	ENSG00000231671	LINC01307	-	long intergenic non-protein coding RNA 1307	ncRNA
siCtrl_G9a_GST_peak_3243	chr17	75956314	75956398	+	138	NA	Intergenic	Intergenic	-43962	NM_001142640	57690	Hs.406810	NM_018996	ENSG00000078687	TNRC6C	-	trinucleotide repeat containing adaptor 6C	protein-coding
siCtrl_G9a_GST_peak_1873	chr12	76178512	76178592	+	137	NA	Intergenic	Intergenic	247004	NM_007350	22822	Hs.602085	NM_007350	ENSG00000139289	PHLDA1	DT1P1B11|PHRIP|TDAG51	pleckstrin homology like domain family A member 1	protein-coding
siCtrl_G9a_GST_peak_7172	chrX	32750562	32750637	+	137	NA	intron (NM_000109, intron 7 of 78)	L1PA3|LINE|L1	-90923	NR_031646	100302239		NR_031646	ENSG00000221348	MIR548F5	MIR548F-5|MIRN548F5|hsa-mir-548f-5	microRNA 548f-5	ncRNA
siCtrl_G9a_GST_peak_2602	chr15	69391279	69392211	+	137	NA	Intergenic	Intergenic	18555	NR_026949	283673	Hs.177927	NM_173610	ENSG00000212766	EWSAT1	LINC00277|NCRNA00277|TMEM84	Ewing sarcoma associated transcript 1	ncRNA
siCtrl_G9a_GST_peak_39	chr1	52703805	52704235	+	137	NA	exon (NM_007324, exon 4 of 18)	exon (NM_007324, exon 4 of 18)	96254	NM_004799	9372	Hs.532345	NM_004799	ENSG00000157077	ZFYVE9	MADHIP|NSP|PPP1R173|SARA|SMADIP	zinc finger FYVE-type containing 9	protein-coding
siCtrl_G9a_GST_peak_3036	chr17	49871072	49871523	+	137	NA	intron (NM_001082533, intron 4 of 9)	intron (NM_001082533, intron 4 of 9)	358509	NR_146897	105371828	Hs.640153	NR_146897		LINC02073	-	long intergenic non-protein coding RNA 2073	ncRNA
siCtrl_G9a_GST_peak_6483	chr7	135006416	135006888	+	137	NA	Intergenic	PABL_B-int|LTR|ERV1	89921	NM_182489	346673	Hs.592279	NM_182489	ENSG00000146857	STRA8	-	stimulated by retinoic acid 8	protein-coding
siCtrl_G9a_GST_peak_1965	chr12	98849217	98849479	+	137	NA	non-coding (NR_033801, exon 1 of 1)	non-coding (NR_033801, exon 1 of 1)	1575	NR_033801	121456	Hs.620643	NR_033801	ENSG00000227825	SLC9A7P1	-	solute carrier family 9 member 7 pseudogene 1	pseudo
siCtrl_G9a_GST_peak_4401	chr21	9742272	9742369	+	137	NA	Intergenic	Intergenic	-83512	NR_037421	100500862		NR_037421	ENSG00000275708	MIR3648-1	MIR3648|hsa-mir-3648-1	microRNA 3648-1	ncRNA
siCtrl_G9a_GST_peak_5300	chr5	72840868	72841318	+	137	NA	Intergenic	MER5B|DNA|hAT-Charlie	20371	NM_023039	57763	Hs.239154	NM_023039	ENSG00000164331	ANKRA2	ANKRA	ankyrin repeat family A member 2	protein-coding
siCtrl_G9a_GST_peak_216	chr1	68329827	68329971	+	137	NA	intron (NR_040077, intron 1 of 9)	intron (NR_040077, intron 1 of 9)	-30749	NM_018841	55970	Hs.431101	NM_018841	ENSG00000172380	GNG12	-	G protein subunit gamma 12	protein-coding
siCtrl_G9a_GST_peak_3692	chr2	48423448	48423870	+	137	NA	Intergenic	Intergenic	-118162	NM_002158	3344	Hs.468478	NM_002158	ENSG00000170802	FOXN2	HTLF	forkhead box N2	protein-coding
siCtrl_G9a_GST_peak_3607	chr2	38319041	38319588	+	137	NA	Intergenic	Intergenic	-15991	NM_000104	1545	Hs.154654	NM_000104	ENSG00000138061	CYP1B1	ASGD6|CP1B|CYPIB1|GLC3A|P4501B1	cytochrome P450 family 1 subfamily B member 1	protein-coding
siCtrl_G9a_GST_peak_3654	chr2	44933291	44933635	+	137	NA	exon (NM_024766, exon 5 of 11)	exon (NM_024766, exon 5 of 11)	232564	NR_147194	107985879	Hs.436392	NR_147194	ENSG00000259439	LINC01833	K21.1|RP11-89	long intergenic non-protein coding RNA 1833	ncRNA
siCtrl_G9a_GST_peak_3711	chr2	50834909	50835349	+	137	NA	intron (NM_001330087, intron 4 of 16)	intron (NM_001330087, intron 4 of 16)	88271	NR_130470	103504737		NR_130470	ENSG00000216191	MIR8485	hsa-mir-8485	microRNA 8485	ncRNA
siCtrl_G9a_GST_peak_2782	chr16	6428137	6428248	+	137	NA	intron (NM_018723, intron 2 of 15)	intron (NM_018723, intron 2 of 15)	358488	NM_001308117	54715	Hs.459842	NM_018723	ENSG00000078328	RBFOX1	2BP1|A2BP1|FOX-1|FOX1|HRNBP1	RNA binding fox-1 homolog 1	protein-coding
siCtrl_G9a_GST_peak_1585	chr12	3821529	3821783	+	137	NA	intron (NM_001144958, intron 3 of 19)	MSTA|LTR|ERVL-MaLR	40619	NM_032680	84766	Hs.504534	NM_032680	ENSG00000130038	CRACR2A	EFCAB4B	calcium release activated channel regulator 2A	protein-coding
siCtrl_G9a_GST_peak_2933	chr17	15113300	15113376	+	137	NA	Intergenic	Intergenic	41675	NR_039884	100616125		NR_039884	ENSG00000265110	MIR4731	-	microRNA 4731	ncRNA
siCtrl_G9a_GST_peak_1306	chr10	129985091	129985508	+	137	NA	Intergenic	AluJr|SINE|Alu	-60612	NM_002417	4288	Hs.80976	NM_002417	ENSG00000148773	MKI67	KIA|MIB-|MIB-1|PPP1R105	marker of proliferation Ki-67	protein-coding
siCtrl_G9a_GST_peak_4191	chr2	234238358	234238730	+	137	NA	intron (NM_000541, intron 9 of 15)	intron (NM_000541, intron 9 of 15)	22082	NM_000541	6295	Hs.32721	NM_000541	ENSG00000130561	SAG	RP47|S-AG	S-antigen visual arrestin	protein-coding
siCtrl_G9a_GST_peak_6487	chr7	135402611	135402862	+	137	NA	intron (NM_001318192, intron 2 of 15)	MLT2B1|LTR|ERVL	10198	NM_012450	26266	Hs.490241	NM_012450	ENSG00000164707	SLC13A4	NAS2|SUT-1|SUT1	solute carrier family 13 member 4	protein-coding
siCtrl_G9a_GST_peak_7290	chrX	106846420	106846487	+	137	NA	exon (NM_032428, exon 16 of 16)	exon (NM_032428, exon 16 of 16)	-25201	NM_002764	5631	Hs.56	NM_002764	ENSG00000147224	PRPS1	ARTS|CMTX5|DFN2|DFNX1|PPRibP|PRS-I|PRSI	phosphoribosyl pyrophosphate synthetase 1	protein-coding
siCtrl_G9a_GST_peak_644	chr1	166276751	166277483	+	136	NA	Intergenic	Intergenic	-141125	NM_001320302	149297	Hs.22930	NM_001017961	ENSG00000188859	FAM78B	-	family with sequence similarity 78 member B	protein-coding
siCtrl_G9a_GST_peak_2773	chr16	4294427	4294595	+	136	NA	Intergenic	LTR9|LTR|ERV1	-2430	NM_001323667	6345	Hs.10041	NM_001098814	ENSG00000185739	SRL	SAR	sarcalumenin	protein-coding
siCtrl_G9a_GST_peak_1955	chr12	98362595	98362938	+	136	NA	Intergenic	Intergenic	26460	NR_036189	100422924		NR_036189	ENSG00000263890	MIR4303	-	microRNA 4303	ncRNA
siCtrl_G9a_GST_peak_3894	chr2	100724443	100724586	+	136	NA	intron (NM_002285, intron 1 of 23)	intron (NM_002285, intron 1 of 23)	-2469	NM_001025108	3899	Hs.444414	NM_002285	ENSG00000144218	AFF3	LAF4|MLLT2-like	AF4/FMR2 family member 3	protein-coding
siCtrl_G9a_GST_peak_3839	chr2	77455557	77455749	+	136	NA	intron (NR_146416, intron 1 of 1)	intron (NR_146416, intron 1 of 1)	242562	NR_110284	101927907	Hs.382185	NR_110284	ENSG00000234653	LOC101927907	-	uncharacterized LOC101927907	ncRNA
siCtrl_G9a_GST_peak_6808	chr8	123200395	123200992	+	136	NA	Intergenic	Intergenic	380190	NR_131202	105375734	Hs.628341	NR_131202		SMILR	-	smooth muscle induced lncRNA, enhancer of proliferation	ncRNA
siCtrl_G9a_GST_peak_3513	chr2	17357332	17357508	+	136	NA	Intergenic	MIRb|SINE|MIR	342287	NM_001099218	729475	Hs.515802	NM_001099218	ENSG00000214842	RAD51AP2	-	RAD51 associated protein 2	protein-coding
siCtrl_G9a_GST_peak_2401	chr14	89703000	89703414	+	136	NA	intron (NM_001085471, intron 4 of 6)	intron (NM_001085471, intron 4 of 6)	180370	NM_005197	1112	Hs.434286	NM_005197	ENSG00000053254	FOXN3	C14orf116|CHES1|PRO1635	forkhead box N3	protein-coding
siCtrl_G9a_GST_peak_5204	chr5	17526768	17526858	+	135	NA	Intergenic	Intergenic	82694	NR_134271	102723526		NR_134270	ENSG00000249662	LINC02218	-	long intergenic non-protein coding RNA 2218	ncRNA
siCtrl_G9a_GST_peak_2036	chr12	113280701	113281118	+	135	NA	intron (NR_145127, intron 4 of 22)	intron (NR_145127, intron 4 of 22)	51356	NR_145127	22895	Hs.21239	NM_014954	ENSG00000089169	RPH3A	-	rabphilin 3A	protein-coding
siCtrl_G9a_GST_peak_1832	chr12	68375919	68376269	+	135	NA	Intergenic	Intergenic	-7131	NR_104125	100885789	Hs.439832	NR_104124	ENSG00000255733	IFNG-AS1	GS1-410F4.2|NEST|Tmevpg1	IFNG antisense RNA 1	ncRNA
siCtrl_G9a_GST_peak_5522	chr6	2990058	2990353	+	135	NA	non-coding (NR_026856, exon 3 of 3)	non-coding (NR_026856, exon 3 of 3)	2004	NR_026856	401232	Hs.720158	NM_207495		LINC01011	-	long intergenic non-protein coding RNA 1011	ncRNA
siCtrl_G9a_GST_peak_2550	chr15	57545372	57545659	+	135	NA	exon (NM_001306220, exon 7 of 12)	exon (NM_001306220, exon 7 of 12)	25340	NR_145748	109616990		NR_145748	ENSG00000239035	SNORD13D	-	small nucleolar RNA, C/D box 13D	snoRNA
siCtrl_G9a_GST_peak_2022	chr12	108784899	108784970	+	135	NA	Intergenic	Intergenic	-51846	NM_001142344	1240	Hs.197143	NM_004072	ENSG00000174600	CMKLR1	CHEMERINR|ChemR23|DEZ|RVER1	chemerin chemokine-like receptor 1	protein-coding
siCtrl_G9a_GST_peak_68	chr1	56021556	56022056	+	135	NA	Intergenic	Intergenic	330492	NR_039618	100616272		NR_039618	ENSG00000265822	MIR4422	mir-4422	microRNA 4422	ncRNA
siCtrl_G9a_GST_peak_318	chr1	94536268	94536480	+	135	NA	intron (NM_000350, intron 11 of 49)	intron (NM_000350, intron 11 of 49)	50330	NM_000350	24	Hs.416707	NM_000350	ENSG00000198691	ABCA4	ABC10|ABCR|ARMD2|CORD3|FFM|RMP|RP19|STGD|STGD1	ATP binding cassette subfamily A member 4	protein-coding
siCtrl_G9a_GST_peak_1606	chr12	15202340	15202707	+	135	NA	Intergenic	Intergenic	47756	NR_120466	101928340	Hs.401232	NR_120466	ENSG00000255727	LINC01489	-	long intergenic non-protein coding RNA 1489	ncRNA
siCtrl_G9a_GST_peak_5847	chr6	110137962	110138367	+	135	NA	intron (NM_014845, intron 22 of 22)	intron (NM_014845, intron 22 of 22)	125740	NM_014845	9896	Hs.529959	NM_014845	ENSG00000112367	FIG4	ALS11|BTOP|CMT4J|KIAA0274|SAC3|YVS|dJ249I4.1	FIG4 phosphoinositide 5-phosphatase	protein-coding
siCtrl_G9a_GST_peak_36	chr1	51881759	51881894	+	135	NA	intron (NM_001981, intron 13 of 24)	intron (NM_001981, intron 13 of 24)	5941	NM_001159969	2060	Hs.83722	NM_001981	ENSG00000085832	EPS15	AF-1P|AF1P|MLLT5	epidermal growth factor receptor pathway substrate 15	protein-coding
siCtrl_G9a_GST_peak_5822	chr6	105667949	105668753	+	135	NA	Intergenic	HERVL-int|LTR|ERVL	-40462	NM_022361	64208	Hs.458336	NM_022361	ENSG00000132429	POPDC3	POP3|bA355M14.1	popeye domain containing 3	protein-coding
siCtrl_G9a_GST_peak_1868	chr12	76099594	76099905	+	134	NA	Intergenic	Intergenic	-194360	NM_007043	11103	Hs.645517	NM_007043	ENSG00000111615	KRR1	HRB2|RIP-1	KRR1 small subunit processome component homolog	protein-coding
siCtrl_G9a_GST_peak_431	chr1	115300633	115300833	+	134	NA	promoter-TSS (NM_001242893)	promoter-TSS (NM_001242893)	-62	NM_001242891	7812	Hs.69855	NM_007158	ENSG00000009307	CSDE1	D1S155E|UNR	cold shock domain containing E1	protein-coding
siCtrl_G9a_GST_peak_3824	chr2	75303340	75303512	+	134	NA	intron (NM_015727, intron 2 of 3)	intron (NM_015727, intron 2 of 3)	-14513	NR_049796	100846995		NR_049796	ENSG00000263909	MIR5000	-	microRNA 5000	ncRNA
siCtrl_G9a_GST_peak_1758	chr12	56586819	56587106	+	134	NA	Intergenic	Intergenic	-3695	NM_003075	6601	Hs.236030	NM_003075	ENSG00000139613	SMARCC2	BAF170|CRACC2|CSS8|Rsc8	SWI/SNF related, matrix associated, actin dependent regulator of chromatin subfamily c member 2	protein-coding
siCtrl_G9a_GST_peak_6101	chr7	3312708	3313084	+	134	NA	Intergenic	CR1_Mam|LINE|CR1	-27988	NM_152744	221935	Hs.653013	NM_152744	ENSG00000146555	SDK1	-	sidekick cell adhesion molecule 1	protein-coding
siCtrl_G9a_GST_peak_6516	chr7	142105137	142105216	+	133	NA	Intergenic	Intergenic	52242	NR_162121	113839523		NR_162121		MIR11400	-	microRNA 11400	ncRNA
siCtrl_G9a_GST_peak_6565	chr8	11141817	11141978	+	133	NA	promoter-TSS (NM_015458)	promoter-TSS (NM_015458)	-428	NM_015458	66036	Hs.591395	NM_015458	ENSG00000104643	MTMR9	C8orf9|LIP-STYX|MTMR8	myotubularin related protein 9	protein-coding
siCtrl_G9a_GST_peak_847	chr1	212058011	212058233	+	133	NA	Intergenic	Intergenic	53819	NR_135820	102723727	Hs.147656	NR_135818	ENSG00000229258	LPGAT1-AS1	-	LPGAT1 antisense RNA 1	ncRNA
siCtrl_G9a_GST_peak_4214	chr20	1815300	1815763	+	133	NA	Intergenic	LTR33|LTR|ERVL	-55139	NR_037142	100289473	Hs.641525	NR_037142	ENSG00000232528	LOC100289473	-	cytoskeleton associated protein 2-like pseudogene	pseudo
siCtrl_G9a_GST_peak_4294	chr20	24702800	24703127	+	133	NA	Intergenic	Intergenic	-226942	NM_003650	8530	Hs.143212	NM_003650	ENSG00000077984	CST7	CMAP	cystatin F	protein-coding
siCtrl_G9a_GST_peak_2744	chr15	94621065	94621535	+	133	NA	intron (NR_120320, intron 2 of 8)	intron (NR_120320, intron 2 of 8)	29867	NR_120320	101927112	Hs.134687	NR_120320	ENSG00000259724	LINC01581	-	long intergenic non-protein coding RNA 1581	ncRNA
siCtrl_G9a_GST_peak_5547	chr6	10557091	10557194	+	133	NA	exon (NM_001491, exon 1 of 3)	exon (NM_001491, exon 1 of 3)	1193	NM_001491	2651	Hs.519884	NM_001491	ENSG00000111846	GCNT2	CCAT|CTRCT13|GCNT2C|GCNT5|IGNT|II|NACGT1|NAGCT1|ULG3|bA360O19.2|bA421M1.1	glucosaminyl (N-acetyl) transferase 2 (I blood group)	protein-coding
siCtrl_G9a_GST_peak_3290	chr18	22006319	22006627	+	133	NA	promoter-TSS (NM_018439)	promoter-TSS (NM_018439)	-161	NM_018439	55364	Hs.515317	NM_018439	ENSG00000154059	IMPACT	RWDD5	impact RWD domain protein	protein-coding
siCtrl_G9a_GST_peak_3140	chr17	59209051	59209116	+	133	NA	intron (NM_001353146, intron 23 of 25)	intron (NM_001353146, intron 23 of 25)	235982	NR_136397	101927855	Hs.662123	NR_136397	ENSG00000267131	LOC101927855	-	uncharacterized LOC101927855	ncRNA
siCtrl_G9a_GST_peak_2794	chr16	12897137	12897563	+	133	NA	intron (NM_001099455, intron 1 of 2)	intron (NM_001099455, intron 1 of 2)	394	NM_001099455	55313	Hs.460002	NM_018340	ENSG00000103381	CPPED1	CSTP1	calcineurin like phosphoesterase domain containing 1	protein-coding
siCtrl_G9a_GST_peak_3881	chr2	98058684	98058877	+	133	NA	Intergenic	Intergenic	30840	NR_103733	100506076	Hs.732616	NR_103732		LOC100506076	-	uncharacterized LOC100506076	ncRNA
siCtrl_G9a_GST_peak_2493	chr15	46897707	46897898	+	133	NA	Intergenic	LTR33|LTR|ERVL	-578484	NM_001198999	80031	Hs.511265	NM_020858	ENSG00000137872	SEMA6D	-	semaphorin 6D	protein-coding
siCtrl_G9a_GST_peak_6783	chr8	102304735	102304886	+	132	NA	Intergenic	MLT1G1|LTR|ERVL-MaLR	-76311	NR_002182	83955	Hs.567608	NM_032031	ENSG00000228224	NACA4P	FKSG17|NACAP1	NACA family member 4, pseudogene	pseudo
siCtrl_G9a_GST_peak_3663	chr2	45342419	45342554	+	132	NA	Intergenic	Intergenic	-105895	NM_016932	10736	Hs.101937	NM_016932	ENSG00000170577	SIX2	-	SIX homeobox 2	protein-coding
siCtrl_G9a_GST_peak_236	chr1	75654100	75654468	+	132	NA	Intergenic	Intergenic	54211	NM_001256114	431707	Hs.403934	NM_001001933	ENSG00000162624	LHX8	LHX7	LIM homeobox 8	protein-coding
siCtrl_G9a_GST_peak_2697	chr15	88335829	88336361	+	132	NA	Intergenic	MIR3|SINE|MIR	153404	NR_162119	113218493		NR_162119		MIR11181	-	microRNA 11181	ncRNA
siCtrl_G9a_GST_peak_2067	chr12	122922028	122922385	+	132	NA	Intergenic	Intergenic	-14990	NM_198240	6249	Hs.524809	NM_002956	ENSG00000130779	CLIP1	CLIP|CLIP-170|CLIP170|CYLN1|RSN	CAP-Gly domain containing linker protein 1	protein-coding
siCtrl_G9a_GST_peak_6217	chr7	36050460	36050750	+	132	NA	Intergenic	Intergenic	-84315	NR_108089	101928618	Hs.561704	NR_108089	ENSG00000261184	LOC101928618	-	uncharacterized LOC101928618	ncRNA
siCtrl_G9a_GST_peak_3523	chr2	18426122	18426441	+	132	NA	Intergenic	Intergenic	315638	NM_020905	57665	Hs.120319	NM_020905	ENSG00000240857	RDH14	PAN2|SDR7C4	retinol dehydrogenase 14	protein-coding
siCtrl_G9a_GST_peak_214	chr1	68326624	68327144	+	132	NA	intron (NR_040077, intron 1 of 9)	L2a|LINE|L2	-27734	NM_018841	55970	Hs.431101	NM_018841	ENSG00000172380	GNG12	-	G protein subunit gamma 12	protein-coding
siCtrl_G9a_GST_peak_3000	chr17	41533764	41534358	+	132	NA	Intergenic	Intergenic	11887	NR_031751	100313779		NR_031751	ENSG00000284344	MIR2117	-	microRNA 2117	ncRNA
siCtrl_G9a_GST_peak_2659	chr15	81680736	81680816	+	132	NA	intron (NR_120365, intron 6 of 6)	intron (NR_120365, intron 6 of 6)	-14222	NM_001080532	342125	Hs.253489	NM_181841	ENSG00000188869	TMC3	-	transmembrane channel like 3	protein-coding
siCtrl_G9a_GST_peak_5912	chr6	121703793	121703934	+	131	NA	Intergenic	Intergenic	-47988	NM_001367759	221322	Hs.121396	NM_152730	ENSG00000146350	TBC1D32	BROMI|C6orf170|C6orf171	TBC1 domain family member 32	protein-coding
siCtrl_G9a_GST_peak_6871	chr8	143315431	143315941	+	131	NA	intron (NM_001363740, intron 12 of 13)	intron (NM_001363740, intron 12 of 13)	35969	NR_024378	619434	Hs.393308	NR_024378	ENSG00000254008	LINC00051	C8orf43|NCRNA00051	long intergenic non-protein coding RNA 51	ncRNA
siCtrl_G9a_GST_peak_7067	chr9	98965436	98965501	+	131	NA	Intergenic	MSTC|LTR|ERVL-MaLR	-43277	NR_146524	105376162	Hs.662614	NR_146524	ENSG00000232283	HSD17B3-AS1	-	HSD17B3 antisense RNA 1	ncRNA
siCtrl_G9a_GST_peak_3039	chr17	49911924	49912019	+	131	NA	intron (NM_001082533, intron 4 of 9)	intron (NM_001082533, intron 4 of 9)	324103	NM_020178	56934	Hs.463466	NM_020178	ENSG00000154975	CA10	CA-RPX|CARPX|HUCEP-15	carbonic anhydrase 10	protein-coding
siCtrl_G9a_GST_peak_6509	chr7	137677338	137677779	+	131	NA	intron (NM_194071, intron 1 of 11)	intron (NM_194071, intron 1 of 11)	9274	NM_001253775	64764	Hs.490273	NM_194071	ENSG00000182158	CREB3L2	BBF2H7	cAMP responsive element binding protein 3 like 2	protein-coding
siCtrl_G9a_GST_peak_93	chr1	56962882	56962944	+	131	NA	intron (NM_003713, intron 5 of 5)	intron (NM_003713, intron 5 of 5)	82278	NR_147163	105378744	Hs.183974	NR_147163	ENSG00000223956	LINC01767	-	long intergenic non-protein coding RNA 1767	ncRNA
siCtrl_G9a_GST_peak_3534	chr2	19362698	19362764	+	131	NA	Intergenic	L1PA3|LINE|L1	-136005	NR_135287	400945	Hs.502854	NR_135287	ENSG00000236204	LINC01376	-	long intergenic non-protein coding RNA 1376	ncRNA
siCtrl_G9a_GST_peak_2016	chr12	107795016	107795266	+	130	NA	intron (NM_001347944, intron 1 of 14)	intron (NM_001347944, intron 1 of 14)	80776	NM_001347944	121551	Hs.271272	NM_152322	ENSG00000151136	BTBD11	ABTB2B	BTB domain containing 11	protein-coding
siCtrl_G9a_GST_peak_7107	chr9	116726631	116726707	+	130	NA	intron (NM_001318042, intron 1 of 14)	intron (NM_001318042, intron 1 of 14)	88080	NM_001318041	114991	Hs.349208	NM_133374	ENSG00000157657	ZNF618	FP13169|NEDD10	zinc finger protein 618	protein-coding
siCtrl_G9a_GST_peak_2560	chr15	58778581	58779014	+	130	NA	intron (NR_120338, intron 2 of 2)	intron (NR_120338, intron 2 of 2)	12137	NR_120338	101928694	Hs.655781	NR_120338	ENSG00000259293	LIPC-AS1	-	LIPC antisense RNA 1	ncRNA
siCtrl_G9a_GST_peak_2475	chr15	45114984	45115202	+	130	NA	Intergenic	Intergenic	59724	NR_146393	653381	Hs.878	NR_146393	ENSG00000259479	SORD2P	SORD2	sorbitol dehydrogenase 2, pseudogene	pseudo
siCtrl_G9a_GST_peak_6086	chr6	170807165	170807273	+	130	NA	Intergenic	Intergenic	55176	NM_002793	5689	Hs.352768	NM_002793	ENSG00000008018	PSMB1	HC5|PMSB1|PSC5	proteasome subunit beta 1	protein-coding
siCtrl_G9a_GST_peak_2168	chr13	40637934	40638045	+	130	NA	Intergenic	Intergenic	-117957	NR_046870	100874127	Hs.578028	NR_046870	ENSG00000230710	LINC00332	NCRNA00332	long intergenic non-protein coding RNA 332	ncRNA
siCtrl_G9a_GST_peak_4822	chr3	149262496	149262650	+	130	NA	intron (NM_015472, intron 3 of 6)	intron (NM_015472, intron 3 of 6)	70089	NM_004617	7104	Hs.133527	NM_004617	ENSG00000169903	TM4SF4	ILTMP|il-TMP	transmembrane 4 L six family member 4	protein-coding
siCtrl_G9a_GST_peak_2916	chr17	11025746	11026285	+	130	NA	Intergenic	LTR33A|LTR|ERVL	-118515	NM_207386	388336	Hs.592124	NM_175903	ENSG00000188803	SHISA6	-	shisa family member 6	protein-coding
siCtrl_G9a_GST_peak_5767	chr6	89179617	89179714	+	130	NA	Intergenic	MSTA|LTR|ERVL-MaLR	69423	NR_110867	101928936	Hs.533080	NR_110867		LOC101928936	-	uncharacterized LOC101928936	ncRNA
siCtrl_G9a_GST_peak_5935	chr6	131152020	131152331	+	130	NA	intron (NM_001195597, intron 1 of 1)	MER41A|LTR|ERV1	3630	NM_001195597	100507203	Hs.388715	NM_001195597	ENSG00000256162	SMLR1	-	small leucine rich protein 1	protein-coding
siCtrl_G9a_GST_peak_5283	chr5	66676917	66677212	+	129	NA	Intergenic	Intergenic	-184437	NM_005582	4064	Hs.87205	NM_005582	ENSG00000134061	CD180	LY64|Ly78|RP105	CD180 molecule	protein-coding
siCtrl_G9a_GST_peak_5879	chr6	115262135	115262240	+	129	NA	Intergenic	Intergenic	702812	NR_134602	105377962	Hs.571066	NR_134602		LINC02534	-	long intergenic non-protein coding RNA 2534	ncRNA
siCtrl_G9a_GST_peak_921	chr1	221101145	221101592	+	129	NA	Intergenic	Intergenic	-47886	NR_046901	100873924	Hs.645593	NR_046901	ENSG00000257551	HLX-AS1	-	HLX antisense RNA 1	ncRNA
siCtrl_G9a_GST_peak_1905	chr12	86175742	86175880	+	129	NA	Intergenic	Intergenic	54376	NM_005447	9182	Hs.527881	NM_005447	ENSG00000198774	RASSF9	P-CIP1|PAMCI|PCIP1	Ras association domain family member 9	protein-coding
siCtrl_G9a_GST_peak_6612	chr8	29756182	29756253	+	129	NA	Intergenic	L2b|LINE|L2	-22812	NR_024473	286135	Hs.376840	NR_024473	ENSG00000253279	LINC02209	FAM183CP	long intergenic non-protein coding RNA 2209	ncRNA
siCtrl_G9a_GST_peak_6310	chr7	66872106	66872289	+	129	NA	Intergenic	Intergenic	71234	NR_108104	101929736	Hs.634050	NR_108104	ENSG00000106610	LINC01372	-	long intergenic non-protein coding RNA 1372	ncRNA
siCtrl_G9a_GST_peak_4679	chr3	65520639	65520808	+	129	NA	intron (NM_001033057, intron 2 of 22)	intron (NM_001033057, intron 2 of 22)	-358768	NR_046575	100873983	Hs.663889	NR_046575	ENSG00000240175	MAGI1-AS1	-	MAGI1 antisense RNA 1	ncRNA
siCtrl_G9a_GST_peak_3316	chr18	42309113	42309178	+	129	NA	intron (NM_001130110, intron 2 of 3)	intron (NM_001130110, intron 2 of 3)	48292	NM_015559	26040	Hs.435458	NM_015559	ENSG00000152217	SETBP1	MRD29|SEB	SET binding protein 1	protein-coding
siCtrl_G9a_GST_peak_164	chr1	61911908	61911991	+	129	NA	intron (NM_001145512, intron 11 of 11)	intron (NM_001145512, intron 11 of 11)	-192759	NR_104180	645030	Hs.632410	NR_104180	ENSG00000237853	NFIA-AS1	-	NFIA antisense RNA 1	ncRNA
siCtrl_G9a_GST_peak_5105	chr4	157684186	157684291	+	129	NA	non-coding (NR_036641, exon 7 of 7)	non-coding (NR_036641, exon 7 of 7)	208713	NM_016205	56034	Hs.570855	NM_016205	ENSG00000145431	PDGFC	FALLOTEIN|SCDGF	platelet derived growth factor C	protein-coding
siCtrl_G9a_GST_peak_5262	chr5	58756700	58756786	+	129	NA	intron (NM_001349242, intron 1 of 16)	intron (NM_001349242, intron 1 of 16)	-103947	NM_001197219	5144	Hs.117545	NM_006203	ENSG00000113448	PDE4D	ACRDYS2|DPDE3|HSPDE4D|PDE43|PDE4DN2|STRK1	phosphodiesterase 4D	protein-coding
siCtrl_G9a_GST_peak_4219	chr20	5381692	5382069	+	129	NA	Intergenic	LTR33|LTR|ERVL	44514	NR_038239	100507629	Hs.121383	NR_038239	ENSG00000226995	LINC00658	-	long intergenic non-protein coding RNA 658	ncRNA
siCtrl_G9a_GST_peak_6438	chr7	127664329	127664504	+	129	NA	intron (NM_014390, intron 16 of 23)	intron (NM_014390, intron 16 of 23)	7074	NM_022143	64101	Hs.655003	NM_022143	ENSG00000128594	LRRC4	NAG14|NGL-2	leucine rich repeat containing 4	protein-coding
siCtrl_G9a_GST_peak_714	chr1	193557926	193557987	+	129	NA	Intergenic	Intergenic	284081	NR_125789	101929184	Hs.146728	NR_125789	ENSG00000232077	LINC01031	TCONS_00000361	long intergenic non-protein coding RNA 1031	ncRNA
siCtrl_G9a_GST_peak_4326	chr20	39525485	39525814	+	129	NA	Intergenic	MIR3|SINE|MIR	-83704	NR_145525	100128988	Hs.636443	NR_145524		LOC100128988	-	uncharacterized LOC100128988	ncRNA
siCtrl_G9a_GST_peak_425	chr1	114521782	114521921	+	129	NA	promoter-TSS (NM_001286353)	promoter-TSS (NM_001286353)	-162	NM_001286353	56944	Hs.9315	NM_020190	ENSG00000116774	OLFML3	HNOEL-iso|OLF44	olfactomedin like 3	protein-coding
siCtrl_G9a_GST_peak_2686	chr15	87397454	87397750	+	129	NA	intron (NM_152336, intron 23 of 24)	intron (NM_152336, intron 23 of 24)	-78509	NR_135682	105370954	Hs.668501	NR_135682	ENSG00000259636	LOC105370954	-	uncharacterized LOC105370954	ncRNA
siCtrl_G9a_GST_peak_6838	chr8	131313054	131313203	+	129	NA	intron (NM_018482, intron 3 of 29)	intron (NM_018482, intron 3 of 29)	-4349	NR_002765	29065	Hs.639318	NR_002765		ASAP1-IT1	ASAP1-IT|ASAP1IT|ASAP1IT1|DDEF1IT1|HSPC054|NCRNA00050	ASAP1 intronic transcript 1	ncRNA
siCtrl_G9a_GST_peak_1395	chr11	27626590	27626670	+	129	NA	intron (NR_033314, intron 3 of 6)	intron (NR_033314, intron 3 of 6)	29544	NR_102708	101410541	Hs.471439	NR_102708	ENSG00000254934	LINC00678	-	long intergenic non-protein coding RNA 678	ncRNA
siCtrl_G9a_GST_peak_5498	chr5	169608790	169609226	+	129	NA	Intergenic	MIRb|SINE|MIR	17137	NR_108022	100507267	Hs.634846	NR_108022		LINC01187	CTB-27N1.1|KIDR	long intergenic non-protein coding RNA 1187	ncRNA
siCtrl_G9a_GST_peak_1176	chr10	72910579	72910789	+	129	NA	Intergenic	Intergenic	-61643	NM_001244889	219699	Hs.522997	NM_170744	ENSG00000107731	UNC5B	UNC5H2|p53RDL1	unc-5 netrin receptor B	protein-coding
siCtrl_G9a_GST_peak_5309	chr5	73722197	73722423	+	129	NA	intron (NR_126354, intron 2 of 2)	intron (NR_126354, intron 2 of 2)	103999	NR_105010	101929082	Hs.434316	NR_105010	ENSG00000249343	LINC01333	-	long intergenic non-protein coding RNA 1333	ncRNA
siCtrl_G9a_GST_peak_3571	chr2	29928855	29929284	+	129	NA	intron (NM_004304, intron 2 of 28)	intron (NM_004304, intron 2 of 28)	215383	NM_004304	238	Hs.654469	NM_004304	ENSG00000171094	ALK	CD246|NBLST3	ALK receptor tyrosine kinase	protein-coding
siCtrl_G9a_GST_peak_6318	chr7	67876817	67877012	+	129	NA	Intergenic	LTR9|LTR|ERV1	391674	NR_120514	102723427	Hs.583491	NR_120514	ENSG00000225209	LOC102723427	-	uncharacterized LOC102723427	ncRNA
siCtrl_G9a_GST_peak_6115	chr7	12646695	12646989	+	129	NA	intron (NM_033128, intron 2 of 13)	MIR3|SINE|MIR	17694	NM_033128	85477	Hs.633359	NM_033128	ENSG00000006747	SCIN	-	scinderin	protein-coding
siCtrl_G9a_GST_peak_2597	chr15	68950555	68950707	+	129	NA	intron (NM_006091, intron 2 of 11)	intron (NM_006091, intron 2 of 11)	16789	NM_001324015	10391	Hs.551213	NM_006091	ENSG00000103647	CORO2B	CLIPINC	coronin 2B	protein-coding
siCtrl_G9a_GST_peak_2388	chr14	82147774	82147866	+	129	NA	Intergenic	Intergenic	-58415	NR_110074	101928559	Hs.525499	NR_110074	ENSG00000258977	LINC01467	-	long intergenic non-protein coding RNA 1467	ncRNA
siCtrl_G9a_GST_peak_6790	chr8	108172371	108172496	+	129	NA	Intergenic	Intergenic	176310	NM_001314051	284	Hs.369675	NM_001146	ENSG00000154188	ANGPT1	AGP1|AGPT|ANG1	angiopoietin 1	protein-coding
siCtrl_G9a_GST_peak_2291	chr13	107717385	107717622	+	129	NA	Intergenic	Intergenic	255808	NR_145739	109616978		NR_145739	ENSG00000201847	SNORD31B	-	small nucleolar RNA, C/D box 31B	snoRNA
siCtrl_G9a_GST_peak_5615	chr6	23612101	23612304	+	129	NA	Intergenic	LFSINE_Vert|SINE|SINE	-514241	NM_080723	140767	Hs.726270	NM_080723	ENSG00000152954	NRSN1	VMP|p24	neurensin 1	protein-coding
siCtrl_G9a_GST_peak_5725	chr6	68700736	68700871	+	129	NA	Intergenic	THE1D|LTR|ERVL-MaLR	-64440	NR_125869	102723883	Hs.566528	NR_125869	ENSG00000223504	LOC102723883	-	uncharacterized LOC102723883	ncRNA
siCtrl_G9a_GST_peak_4600	chr3	24650975	24651081	+	129	NA	Intergenic	MLT1N2|LTR|ERVL-MaLR	-113829	NM_001354708	7068	Hs.187861	NM_000461	ENSG00000151090	THRB	C-ERBA-2|C-ERBA-BETA|ERBA2|GRTH|NR1A2|PRTH|THR1|THRB1|THRB2	thyroid hormone receptor beta	protein-coding
siCtrl_G9a_GST_peak_7012	chr9	78248493	78248735	+	129	NA	Intergenic	Intergenic	-256946	NM_001190482	5125	Hs.368542	NM_006200	ENSG00000099139	PCSK5	PC5|PC6|PC6A|SPC6	proprotein convertase subtilisin/kexin type 5	protein-coding
siCtrl_G9a_GST_peak_3306	chr18	36119510	36119569	+	129	NA	Intergenic	Intergenic	882441	NR_036202	100422857		NR_036202	ENSG00000266530	MIR4318	-	microRNA 4318	ncRNA
siCtrl_G9a_GST_peak_4717	chr3	76773304	76773462	+	129	NA	Intergenic	Intergenic	-315867	NM_001290065	6092	Hs.13305	NM_002942	ENSG00000185008	ROBO2	SAX3	roundabout guidance receptor 2	protein-coding
siCtrl_G9a_GST_peak_5409	chr5	141863042	141863394	+	129	NA	Intergenic	Intergenic	137681	NM_001144892	2246	Hs.483635	NM_000800	ENSG00000113578	FGF1	AFGF|ECGF|ECGF-beta|ECGFA|ECGFB|FGF-1|FGF-alpha|FGFA|GLIO703|HBGF-1|HBGF1	fibroblast growth factor 1	protein-coding
siCtrl_G9a_GST_peak_6130	chr7	18886429	18886769	+	129	NA	intron (NM_001321897, intron 21 of 25)	intron (NM_001321897, intron 21 of 25)	270660	NM_000474	7291	Hs.66744	NM_000474	ENSG00000122691	TWIST1	ACS3|BPES2|BPES3|CRS|CRS1|CSO|SCS|SWCOS|TWIST|bHLHa38	twist family bHLH transcription factor 1	protein-coding
siCtrl_G9a_GST_peak_6473	chr7	133469540	133469781	+	129	NA	intron (NM_021807, intron 10 of 17)	intron (NM_021807, intron 10 of 17)	39981	NR_120513	101928861	Hs.675747	NR_120513		LOC101928861	-	uncharacterized LOC101928861	ncRNA
siCtrl_G9a_GST_peak_1827	chr12	68151282	68151624	+	129	NA	Intergenic	Intergenic	-28198	NR_110063	101927901	Hs.369609	NR_110063	ENSG00000255970	LINC02421	-	long intergenic non-protein coding RNA 2421	ncRNA
siCtrl_G9a_GST_peak_6434	chr7	127471496	127471675	+	129	NA	intron (NM_014390, intron 11 of 23)	intron (NM_014390, intron 11 of 23)	-165977	NR_027330	27099	Hs.657377	NM_014411	ENSG00000279078	SND1-IT1	C7orf54|NAG8|NSG-X	SND1 intronic transcript 1	ncRNA
siCtrl_G9a_GST_peak_227	chr1	69211510	69211913	+	129	NA	Intergenic	Intergenic	-248946	NM_001114120	55635	Hs.445098	NM_017779	ENSG00000024526	DEPDC1	DEP.8|DEPDC1-V2|DEPDC1A|SDP35	DEP domain containing 1	protein-coding
siCtrl_G9a_GST_peak_165	chr1	61912093	61912413	+	129	NA	intron (NM_001145512, intron 11 of 11)	intron (NM_001145512, intron 11 of 11)	-193063	NR_104180	645030	Hs.632410	NR_104180	ENSG00000237853	NFIA-AS1	-	NFIA antisense RNA 1	ncRNA
siCtrl_G9a_GST_peak_5747	chr6	80493871	80494439	+	129	NA	Intergenic	Intergenic	27808	NR_131786	89758	Hs.288213	NM_001243308		LINC01621	C6orf7	long intergenic non-protein coding RNA 1621	ncRNA
siCtrl_G9a_GST_peak_5345	chr5	109367232	109367772	+	129	NA	Intergenic	Intergenic	148619	NR_033175	100289673	Hs.368405	NR_033175		LINC01848	-	long intergenic non-protein coding RNA 1848	ncRNA
siCtrl_G9a_GST_peak_2908	chr17	967373	967448	+	129	NA	intron (NM_001092, intron 9 of 21)	intron (NM_001092, intron 9 of 21)	14823	NM_001282149	29	Hs.159306	NM_001092	ENSG00000159842	ABR	MDB	ABR activator of RhoGEF and GTPase	protein-coding
siCtrl_G9a_GST_peak_264	chr1	77844859	77845095	+	129	NA	intron (NM_012093, intron 6 of 13)	intron (NM_012093, intron 6 of 13)	96205	NM_012093	26289	Hs.559718	NM_012093	ENSG00000154027	AK5	AK6	adenylate kinase 5	protein-coding
siCtrl_G9a_GST_peak_6778	chr8	99456743	99456901	+	129	NA	Intergenic	L2c|LINE|L2	17636	NM_020697	3788	Hs.388045	NM_020697	ENSG00000156486	KCNS2	KV9.2	potassium voltage-gated channel modifier subfamily S member 2	protein-coding
siCtrl_G9a_GST_peak_1372	chr11	19563568	19563829	+	129	NA	intron (NM_001111018, intron 1 of 37)	L3|LINE|CR1	-18073	NR_033989	399876	Hs.132600	NR_033989	ENSG00000254622	NAV2-AS4	-	NAV2 antisense RNA 4	ncRNA
siCtrl_G9a_GST_peak_2393	chr14	87008451	87008738	+	129	NA	Intergenic	Intergenic	-363528	NR_038445	283585	Hs.381998	NR_038445	ENSG00000258804	LINC01148	-	long intergenic non-protein coding RNA 1148	ncRNA
siCtrl_G9a_GST_peak_1268	chr10	113743928	113744364	+	129	NA	Intergenic	LTR16A1|LTR|ERVL	199377	NM_020918	57678	Hs.42586	NM_020918	ENSG00000119927	GPAM	GPAT|GPAT1	glycerol-3-phosphate acyltransferase, mitochondrial	protein-coding
siCtrl_G9a_GST_peak_1718	chr12	42356148	42356336	+	129	NA	Intergenic	Intergenic	182434	NM_173601	283464	Hs.259347	NM_173601	ENSG00000151233	GXYLT1	GLT8D3	glucoside xylosyltransferase 1	protein-coding
siCtrl_G9a_GST_peak_5074	chr4	119346963	119347034	+	129	NA	Intergenic	Intergenic	-72840	NM_003619	8492	Hs.445857	NM_003619	ENSG00000164099	PRSS12	BSSP-3|BSSP3|MRT1	serine protease 12	protein-coding
siCtrl_G9a_GST_peak_1598	chr12	15039003	15039121	+	129	NA	promoter-TSS (NM_000900)	promoter-TSS (NM_000900)	-274	NM_000900	4256	Hs.365706	NM_000900	ENSG00000111341	MGP	GIG36|MGLAP|NTI	matrix Gla protein	protein-coding
siCtrl_G9a_GST_peak_1772	chr12	63108428	63108499	+	129	NA	intron (NM_020700, intron 6 of 9)	intron (NM_020700, intron 6 of 9)	110997	NR_029661	406891		NR_029661	ENSG00000199179	MIRLET7I	LET7I|MIRNLET7I|hsa-let-7i|let-7i	microRNA let-7i	ncRNA
siCtrl_G9a_GST_peak_4755	chr3	115753166	115753253	+	129	NA	intron (NM_002338, intron 2 of 6)	intron (NM_002338, intron 2 of 6)	-129236	NR_145779	109623450		NR_145779		SNORD155	-	small nucleolar RNA, C/D box 155	snoRNA
siCtrl_G9a_GST_peak_3055	chr17	52848186	52848480	+	129	NA	Intergenic	7SK|RNA|RNA	-129719	NM_001321175	10040	Hs.153504	NM_005486	ENSG00000141198	TOM1L1	SRCASM	target of myb1 like 1 membrane trafficking protein	protein-coding
siCtrl_G9a_GST_peak_5880	chr6	115262425	115262522	+	129	NA	Intergenic	MER91A|DNA|hAT-Tip100	702526	NR_134602	105377962	Hs.571066	NR_134602		LINC02534	-	long intergenic non-protein coding RNA 2534	ncRNA
siCtrl_G9a_GST_peak_5855	chr6	111612718	111613305	+	129	NA	Intergenic	Intergenic	32469	NM_153369	91749	Hs.400572	NM_153369	ENSG00000173214	MFSD4B	KIAA1919|NaGLT1	major facilitator superfamily domain containing 4B	protein-coding
siCtrl_G9a_GST_peak_2694	chr15	87750783	87751098	+	129	NA	Intergenic	Intergenic	-219283	NR_135683	102724452	Hs.128062	NR_135683	ENSG00000259620	LOC102724452	-	uncharacterized LOC102724452	ncRNA
siCtrl_G9a_GST_peak_6587	chr8	20369725	20369904	+	129	NA	Intergenic	Intergenic	102623	NR_145737	109616983		NR_145737		SNORD3F	-	small nucleolar RNA, C/D box 3F	snoRNA
siCtrl_G9a_GST_peak_1229	chr10	89145705	89145812	+	129	NA	Intergenic	THE1B|LTR|ERVL-MaLR	21699	NR_046091	728218	Hs.713428	NR_046091		FAM245A	LINC00864	family with sequence similarity 245 member A	ncRNA
siCtrl_G9a_GST_peak_7152	chrX	1566111	1566454	+	129	NA	intron (NM_001173473, intron 1 of 12).2	LTR19A|LTR|ERV1	5520	NM_001173474	8623	Hs.533514	NM_004192	ENSG00000169093	ASMTL	ASMTLX|ASMTLY|ASTML	acetylserotonin O-methyltransferase like	protein-coding
siCtrl_G9a_GST_peak_5558	chr6	14693889	14694245	+	129	NA	Intergenic	MLT1J|LTR|ERVL-MaLR	-408382	NR_108096	102216342	Hs.563409	NR_108096	ENSG00000226673	LINC01108	LncRNA-ES1	long intergenic non-protein coding RNA 1108	ncRNA
siCtrl_G9a_GST_peak_1408	chr11	36184179	36184473	+	129	NA	intron (NM_174902, intron 4 of 5)	intron (NM_174902, intron 4 of 5)	-84875	NR_135064	101928510	Hs.675857	NR_135064		LOC101928510	-	uncharacterized LOC101928510	ncRNA
siCtrl_G9a_GST_peak_4005	chr2	158899855	158900012	+	129	NA	intron (NM_001135098, intron 2 of 8)	intron (NM_001135098, intron 2 of 8)	48242	NM_001135098	151531	Hs.128427	NM_173355	ENSG00000007001	UPP2	UDRPASE2|UP2|UPASE2	uridine phosphorylase 2	protein-coding
siCtrl_G9a_GST_peak_4531	chr22	33300250	33300322	+	129	NA	intron (NM_133633, intron 3 of 11)	MLT1J2|LTR|ERVL-MaLR	102520	NM_133633	8224	Hs.608750	NM_003490	ENSG00000185666	SYN3	-	synapsin III	protein-coding
siCtrl_G9a_GST_peak_4103	chr2	205930351	205930523	+	129	NA	intron (NM_205863, intron 4 of 21)	MSTB2|LTR|ERVL-MaLR	520239	NM_057177	117583	Hs.657382	NM_057177	ENSG00000116117	PARD3B	ALS2CR19|PAR3B|PAR3L|PAR3beta	par-3 family cell polarity regulator beta	protein-coding
siCtrl_G9a_GST_peak_7310	chrY	2709397	2709460	+	129	NA	promoter-TSS (NM_001008)	promoter-TSS (NM_001008)	-215	NM_001008	6192	Hs.282376	NM_001008	ENSG00000129824	RPS4Y1	RPS4Y|S4	ribosomal protein S4 Y-linked 1	protein-coding
siCtrl_G9a_GST_peak_5471	chr5	168207262	168207506	+	129	NA	intron (NM_001271946, intron 12 of 35)	intron (NM_001271946, intron 12 of 35)	-12124	NR_029632	407001		NR_029632	ENSG00000207739	MIR218-2	MIRN218-2|mir-218-2	microRNA 218-2	ncRNA
siCtrl_G9a_GST_peak_619	chr1	163663641	163663747	+	129	NA	Intergenic	Intergenic	-270713	NR_104294	100422212	Hs.556898	NR_104294		LOC100422212	-	eukaryotic translation initiation factor 3 subunit J pseudogene	pseudo
siCtrl_G9a_GST_peak_6627	chr8	37168720	37168952	+	129	NA	intron (NR_031672, intron 2 of 2).2	L3|LINE|CR1	182595	NR_121620	100507420	Hs.105962	NR_121620		LINC01605	LincDUSP	long intergenic non-protein coding RNA 1605	ncRNA
siCtrl_G9a_GST_peak_1473	chr11	77820516	77820589	+	129	NA	exon (NM_024079, exon 9 of 13)	exon (NM_024079, exon 9 of 13)	-29644	NM_004549	4718	Hs.407860	NM_004549	ENSG00000151366	NDUFC2	B14.5b|CI-B14.5b|HLC-1|NADHDH2	NADH:ubiquinone oxidoreductase subunit C2	protein-coding
siCtrl_G9a_GST_peak_2305	chr14	19658487	19659007	+	129	NA	intron (NR_122112, intron 6 of 7)	intron (NR_122112, intron 6 of 7)	8710	NR_122112	503638	Hs.474095	NR_122111		DUXAP9	LINC01296	double homeobox A pseudogene 9	pseudo
siCtrl_G9a_GST_peak_5443	chr5	155865204	155865379	+	129	NA	intron (NM_172244, intron 3 of 7)	intron (NM_172244, intron 3 of 7)	111117	NM_001128209	6444	Hs.387207	NM_000337	ENSG00000170624	SGCD	35DAG|CMD1L|DAGD|LGMDR6|SG-delta|SGCDP|SGD	sarcoglycan delta	protein-coding
siCtrl_G9a_GST_peak_3783	chr2	67929308	67929596	+	129	NA	Intergenic	Intergenic	123242	NR_110271	101927701	Hs.348697	NR_110271	ENSG00000237013	LINC01812	-	long intergenic non-protein coding RNA 1812	ncRNA
siCtrl_G9a_GST_peak_5327	chr5	92313566	92313668	+	129	NA	Intergenic	Intergenic	593432	NR_109825	441094	Hs.457407	NR_015369	ENSG00000237187	NR2F1-AS1	-	NR2F1 antisense RNA 1	ncRNA
siCtrl_G9a_GST_peak_4107	chr2	206525170	206525401	+	129	NA	Intergenic	Intergenic	-21939	NM_201264	8828	Hs.471200	NM_003872	ENSG00000118257	NRP2	NP2|NPN2|PRO2714|VEGF165R2	neuropilin 2	protein-coding
siCtrl_G9a_GST_peak_4463	chr22	16184826	16185023	+	129	NA	intron (NR_122113, intron 6 of 7)	intron (NR_122113, intron 6 of 7)	8085	NR_122113	503637	Hs.744284	NR_122113	ENSG00000206195	DUXAP8	-	double homeobox A pseudogene 8	pseudo
siCtrl_G9a_GST_peak_907	chr1	219965179	219965256	+	129	NA	Intergenic	Intergenic	136776	NM_018713	55532	Hs.284450	NM_018713	ENSG00000196660	SLC30A10	HMDPC|HMNDYT1|ZNT10|ZNT8|ZRC1|ZnT-10	solute carrier family 30 member 10	protein-coding
siCtrl_G9a_GST_peak_6284	chr7	51589685	51589885	+	129	NA	Intergenic	Intergenic	-128832	NR_157843	107986794		NR_157843		LOC107986794	-	uncharacterized LOC107986794	ncRNA
siCtrl_G9a_GST_peak_6285	chr7	51589964	51590204	+	129	NA	Intergenic	MIRc|SINE|MIR	-129131	NR_157843	107986794		NR_157843		LOC107986794	-	uncharacterized LOC107986794	ncRNA
siCtrl_G9a_GST_peak_6136	chr7	24903948	24904126	+	129	NA	intron (NR_104111, intron 6 of 21)	MER5A|DNA|hAT-Charlie	28203	NM_145321	26031	Hs.520259	NM_015550	ENSG00000070882	OSBPL3	ORP-3|ORP3|OSBP3	oxysterol binding protein like 3	protein-coding
siCtrl_G9a_GST_peak_2919	chr17	11229794	11230019	+	129	NA	intron (NM_001173461, intron 2 of 3)	intron (NM_001173461, intron 2 of 3)	85166	NM_001173461	388336	Hs.592124	NM_175903	ENSG00000188803	SHISA6	-	shisa family member 6	protein-coding
siCtrl_G9a_GST_peak_6083	chr6	169164834	169164975	+	129	NA	Intergenic	MSTD|LTR|ERVL-MaLR	199573	NR_136248	105378146	Hs.343631	NR_136248		LOC105378146	-	uncharacterized LOC105378146	ncRNA
siCtrl_G9a_GST_peak_749	chr1	203610255	203610554	+	129	NA	intron (NM_001365784, intron 1 of 20)	intron (NM_001365784, intron 1 of 20)	13339	NM_001365784	493	Hs.343522	NM_001684	ENSG00000058668	ATP2B4	ATP2B2|MXRA1|PMCA4|PMCA4b|PMCA4x	ATPase plasma membrane Ca2+ transporting 4	protein-coding
siCtrl_G9a_GST_peak_2155	chr13	36384449	36384834	+	129	NA	intron (NM_001195416, intron 8 of 12)	intron (NM_001195416, intron 8 of 12)	45163	NM_001195430	9201	Hs.507755	NM_004734	ENSG00000133083	DCLK1	CL1|CLICK1|DCAMKL1|DCDC3A|DCLK	doublecortin like kinase 1	protein-coding
siCtrl_G9a_GST_peak_6253	chr7	42388384	42388597	+	129	NA	Intergenic	Intergenic	-111682	NM_000168	2737	Hs.21509	NM_000168	ENSG00000106571	GLI3	ACLS|GCPS|GLI3-190|GLI3FL|PAP-A|PAPA|PAPA1|PAPB|PHS|PPDIV	GLI family zinc finger 3	protein-coding
siCtrl_G9a_GST_peak_2683	chr15	87308676	87308816	+	129	NA	intron (NM_152336, intron 23 of 24)	L2c|LINE|L2	-167365	NR_135682	105370954	Hs.668501	NR_135682	ENSG00000259636	LOC105370954	-	uncharacterized LOC105370954	ncRNA
siCtrl_G9a_GST_peak_5720	chr6	65443686	65443751	+	129	NA	intron (NM_001292009, intron 22 of 43)	intron (NM_001292009, intron 22 of 43)	-567593	NM_001271675	441155	Hs.546686	NM_001271675		LOC441155	-	zinc finger CCCH-type domain-containing-like	protein-coding
siCtrl_G9a_GST_peak_1675	chr12	30344458	30344665	+	129	NA	Intergenic	Intergenic	-406869	NM_175861	83857	Hs.401954	NM_031920	ENSG00000133687	TMTC1	ARG99|OLF|TMTC1A	transmembrane O-mannosyltransferase targeting cadherins 1	protein-coding
siCtrl_G9a_GST_peak_6196	chr7	31931794	31931906	+	129	NA	intron (NM_001322059, intron 3 of 17)	intron (NM_001322059, intron 3 of 17)	178169	NM_001191057	5137	Hs.143821	NM_005020	ENSG00000154678	PDE1C	DFNA74|Hcam3|cam-PDE 1C|hCam-3	phosphodiesterase 1C	protein-coding
siCtrl_G9a_GST_peak_4135	chr2	209585083	209585448	+	129	NA	intron (NR_136588, intron 3 of 5)	THE1C|LTR|ERVL-MaLR	177898	NR_136588	101927960	Hs.159960	NR_136588		LOC101927960	-	uncharacterized LOC101927960	ncRNA
siCtrl_G9a_GST_peak_7093	chr9	110845751	110845892	+	129	NA	Intergenic	Intergenic	-593771	NM_004235	9314	Hs.376206	NM_004235	ENSG00000136826	KLF4	EZF|GKLF	Kruppel like factor 4	protein-coding
siCtrl_G9a_GST_peak_2103	chr12	129621303	129621363	+	129	NA	intron (NM_133448, intron 5 of 8)	HAL1-2a_MD|LINE|L1	27098	NR_104173	283352	Hs.665667	NR_104172	ENSG00000249196	TMEM132D-AS1	-	TMEM132D antisense RNA 1	ncRNA
siCtrl_G9a_GST_peak_5179	chr5	9765634	9765812	+	129	NA	non-coding (NR_027112, exon 5 of 13)	non-coding (NR_027112, exon 5 of 13)	-88766	NR_147004	105374648	Hs.158853	NR_147004		LINC02221	-	long intergenic non-protein coding RNA 2221	ncRNA
siCtrl_G9a_GST_peak_5983	chr6	143014165	143014490	+	129	NA	Intergenic	Intergenic	-55301	NR_027312	153910	Hs.350819	NR_027311	ENSG00000236366	LOC153910	-	uncharacterized LOC153910	ncRNA
siCtrl_G9a_GST_peak_4842	chr3	159579223	159579396	+	129	NA	intron (NM_001197109, intron 1 of 6)	intron (NM_001197109, intron 1 of 6)	21659	NM_001197109	29970	Hs.134665	NM_014575	ENSG00000151967	SCHIP1	SCHIP-1	schwannomin interacting protein 1	protein-coding
siCtrl_G9a_GST_peak_6291	chr7	54184753	54184979	+	129	NA	Intergenic	L1MCb|LINE|L1	-213524	NR_120515	102723605	Hs.154626	NR_120515	ENSG00000231427	LINC01445	-	long intergenic non-protein coding RNA 1445	ncRNA
siCtrl_G9a_GST_peak_2678	chr15	87033294	87033608	+	129	NA	intron (NM_152336, intron 18 of 24)	intron (NM_152336, intron 18 of 24)	-173252	NR_046012	727915	Hs.451281	NR_046012	ENSG00000260125	AGBL1-AS1	-	AGBL1 antisense RNA 1	ncRNA
siCtrl_G9a_GST_peak_1081	chr10	14708294	14708547	+	129	NA	intron (NM_001282695, intron 2 of 5)	THE1C|LTR|ERVL-MaLR	-62020	NM_001282696	83641	Hs.446315	NM_031453	ENSG00000065809	FAM107B	C10orf45|HITS	family with sequence similarity 107 member B	protein-coding
siCtrl_G9a_GST_peak_5177	chr5	7016099	7016183	+	129	NA	Intergenic	Intergenic	-188107	NR_036242	100422999		NR_036242	ENSG00000283420	MIR4278	-	microRNA 4278	ncRNA
siCtrl_G9a_GST_peak_4624	chr3	36813141	36813250	+	129	NA	Intergenic	Intergenic	-31843	NM_033403	85443	Hs.631907	NM_033403	ENSG00000163673	DCLK3	CLR|DCAMKL3|DCDC3C|DCK3	doublecortin like kinase 3	protein-coding
siCtrl_G9a_GST_peak_4978	chr4	49512163	49512375	+	129	NA	Intergenic	L1MB8|LINE|L1	523610	NM_001286791	80157	Hs.479703	NM_025087	ENSG00000109182	CWH43	CWH43-C|PGAP2IP	cell wall biogenesis 43 C-terminal homolog	protein-coding
siCtrl_G9a_GST_peak_5042	chr4	90077647	90077728	+	129	NA	Intergenic	Intergenic	43719	NM_145715	166815	Hs.58924	NM_145715	ENSG00000180346	TIGD2	HEL106	tigger transposable element derived 2	protein-coding
siCtrl_G9a_GST_peak_6447	chr7	131641144	131641303	+	129	NA	Intergenic	THE1B|LTR|ERVL-MaLR	46244	NR_110836	101928782	Hs.571369	NR_110836	ENSG00000224865	LOC101928782	-	uncharacterized LOC101928782	ncRNA
siCtrl_G9a_GST_peak_7077	chr9	103518973	103519199	+	129	NA	Intergenic	THE1A|LTR|ERVL-MaLR	178725	NM_001018116	347273	Hs.99004	NM_001018116	ENSG00000170681	CAVIN4	MURC|cavin-4	caveolae associated protein 4	protein-coding
siCtrl_G9a_GST_peak_2458	chr15	32613049	32613111	+	129	NA	Intergenic	MLT1F2|LTR|ERVL-MaLR	82413	NM_001282493	653125		NM_001282493	ENSG00000249931	GOLGA8K	-	golgin A8 family member K	protein-coding
siCtrl_G9a_GST_peak_386	chr1	108035625	108036168	+	129	NA	Intergenic	MLT1B|LTR|ERVL-MaLR	195225	NM_001079874	10451	Hs.267659	NM_006113	ENSG00000134215	VAV3	-	vav guanine nucleotide exchange factor 3	protein-coding
siCtrl_G9a_GST_peak_3989	chr2	150589514	150589602	+	129	NA	intron (NR_110240, intron 1 of 2)	intron (NR_110240, intron 1 of 2)	126147	NR_145421	150596	Hs.470217	NM_153041	ENSG00000162947	LINC01931	-	long intergenic non-protein coding RNA 1931	ncRNA
siCtrl_G9a_GST_peak_6694	chr8	62380211	62380302	+	129	NA	intron (NM_173519, intron 5 of 5)	intron (NM_173519, intron 5 of 5)	179727	NM_173519	157807	Hs.591874	NM_173519	ENSG00000177182	CLVS1	C6orf212L|CRALBPL|RLBP1L1	clavesin 1	protein-coding
siCtrl_G9a_GST_peak_4411	chr21	16453838	16454075	+	129	NA	Intergenic	MLT1K|LTR|ERVL-MaLR	-16635	NM_003489	8204	Hs.155017	NM_003489	ENSG00000180530	NRIP1	CAKUT3|RIP140	nuclear receptor interacting protein 1	protein-coding
siCtrl_G9a_GST_peak_4723	chr3	88023148	88023315	+	129	NA	intron (NM_001322210, intron 2 of 2)	intron (NM_001322210, intron 2 of 2)	-8495	NM_000866	3355	Hs.248136	NM_000866	ENSG00000179097	HTR1F	5-HT-1F|5-HT1F|5HT6|HTR1EL|MR77	5-hydroxytryptamine receptor 1F	protein-coding
siCtrl_G9a_GST_peak_4436	chr21	39426488	39426738	+	129	NA	non-coding (NR_147130, exon 3 of 3)	non-coding (NR_147130, exon 3 of 3)	66841	NR_147130	10281	Hs.23251	NM_005867	ENSG00000184029	DSCR4	DCRB|DSCRB	Down syndrome critical region 4	ncRNA
siCtrl_G9a_GST_peak_6832	chr8	129374382	129374472	+	129	NA	Intergenic	Intergenic	202498	NR_121673	101927774	Hs.628730	NR_121672		LINC00824	LINC01263	long intergenic non-protein coding RNA 824	ncRNA
siCtrl_G9a_GST_peak_5701	chr6	56123982	56124157	+	129	NA	intron (NM_001318752, intron 1 of 28)	intron (NM_001318752, intron 1 of 28)	-11691	NR_134849	81578	Hs.47629	NM_030820	ENSG00000124749	COL21A1	COLA1L|FP633	collagen type XXI alpha 1 chain	protein-coding
siCtrl_G9a_GST_peak_6799	chr8	118197722	118197786	+	129	NA	Intergenic	Intergenic	50520	NM_001172814	169026	Hs.532270	NM_173851	ENSG00000164756	SLC30A8	ZNT8|ZnT-8	solute carrier family 30 member 8	protein-coding
siCtrl_G9a_GST_peak_1295	chr10	123238211	123238406	+	129	NA	non-coding (NR_073009, exon 17 of 17)	non-coding (NR_073009, exon 17 of 17)	52520	NM_001320654	2263	Hs.533683	NM_000141	ENSG00000066468	FGFR2	BBDS|BEK|BFR-1|CD332|CEK3|CFD1|ECT1|JWS|K-SAM|KGFR|TK14|TK25	fibroblast growth factor receptor 2	protein-coding
siCtrl_G9a_GST_peak_5939	chr6	131157733	131157800	+	129	NA	3' UTR (NM_001195597, exon 2 of 2)	3' UTR (NM_001195597, exon 2 of 2)	9221	NM_001195597	100507203	Hs.388715	NM_001195597	ENSG00000256162	SMLR1	-	small leucine rich protein 1	protein-coding
siCtrl_G9a_GST_peak_5041	chr4	87979261	87979736	+	129	NA	intron (NM_005935, intron 3 of 19)	intron (NM_005935, intron 3 of 19)	51345	NM_005935	4299	Hs.480190	NM_005935	ENSG00000172493	AFF1	AF4|MLLT2|PBM1	AF4/FMR2 family member 1	protein-coding
siCtrl_G9a_GST_peak_6164	chr7	28658625	28659242	+	129	NA	intron (NM_182898, intron 5 of 10)	intron (NM_182898, intron 5 of 10)	-66817	NM_001011666	9586	Hs.437075	NM_004904	ENSG00000146592	CREB5	CRE-BPA|CREB-5|CREBPA	cAMP responsive element binding protein 5	protein-coding
siCtrl_G9a_GST_peak_2544	chr15	54310056	54310422	+	129	NA	intron (NM_001080534, intron 1 of 30)	LFSINE_Vert|SINE|SINE	5394	NM_001080534	440279	Hs.657273	NM_001080534	ENSG00000137766	UNC13C	-	unc-13 homolog C	protein-coding
siCtrl_G9a_GST_peak_3720	chr2	52619964	52620028	+	129	NA	intron (NR_135237, intron 10 of 10)	THE1C|LTR|ERVL-MaLR	22210	NR_135239	105374596		NR_135239	ENSG00000225444	LINC01867	-	long intergenic non-protein coding RNA 1867	ncRNA
siCtrl_G9a_GST_peak_5478	chr5	168315552	168315624	+	129	NA	intron (NM_001271946, intron 4 of 35)	intron (NM_001271946, intron 4 of 35)	-120328	NR_029632	407001		NR_029632	ENSG00000207739	MIR218-2	MIRN218-2|mir-218-2	microRNA 218-2	ncRNA
siCtrl_G9a_GST_peak_1972	chr12	101115072	101115518	+	129	NA	Intergenic	Intergenic	-73259	NM_001286615	121601	Hs.58785	NM_178826	ENSG00000151572	ANO4	TMEM16D	anoctamin 4	protein-coding
siCtrl_G9a_GST_peak_7163	chrX	13894767	13894882	+	129	NA	intron (NM_001318729, intron 1 of 6)	intron (NM_001318729, intron 1 of 6)	-59346	NM_005278	2824	Hs.495710	NM_005278	ENSG00000046653	GPM6B	M6B	glycoprotein M6B	protein-coding
siCtrl_G9a_GST_peak_5223	chr5	34583988	34584470	+	129	NA	Intergenic	MSTC|LTR|ERVL-MaLR	-72204	NM_001145522	26064	Hs.431400	NM_015577	ENSG00000039560	RAI14	NORPEG|RAI13	retinoic acid induced 14	protein-coding
siCtrl_G9a_GST_peak_4217	chr20	5354136	5354572	+	129	NA	Intergenic	Intergenic	-56976	NM_144773	128674	Hs.375029	NM_144773	ENSG00000101292	PROKR2	GPR73L1|GPR73b|GPRg2|HH3|KAL3|PKR2|dJ680N4.3	prokineticin receptor 2	protein-coding
siCtrl_G9a_GST_peak_6755	chr8	93639197	93639360	+	129	NA	intron (NR_125827, intron 3 of 4)	intron (NR_125827, intron 3 of 4)	28444	NR_125827	102724710	Hs.125714	NR_125827	ENSG00000253634	LOC102724710	-	uncharacterized LOC102724710	ncRNA
siCtrl_G9a_GST_peak_3302	chr18	33991815	33991884	+	129	NA	intron (NM_025135, intron 3 of 24)	intron (NM_025135, intron 3 of 24)	114173	NM_001281740	80206	Hs.436636	NM_025135	ENSG00000134775	FHOD3	FHOS2|Formactin2	formin homology 2 domain containing 3	protein-coding
siCtrl_G9a_GST_peak_6478	chr7	133689888	133690193	+	129	NA	intron (NM_021807, intron 16 of 17)	intron (NM_021807, intron 16 of 17)	-122053	NM_001365700	136332	Hs.149774	NM_144648	ENSG00000155530	LRGUK	CFAP246	leucine rich repeats and guanylate kinase domain containing	protein-coding
siCtrl_G9a_GST_peak_5079	chr4	121722447	121722605	+	128	NA	intron (NM_001300824, intron 7 of 13)	intron (NM_001300824, intron 7 of 13)	121495	NM_001300823	11107	Hs.666782	NM_018699	ENSG00000138738	PRDM5	BCS2|PFM2	PR/SET domain 5	protein-coding
siCtrl_G9a_GST_peak_3004	chr17	42882146	42882275	+	128	NA	exon (NM_005497, exon 3 of 3)	exon (NM_005497, exon 3 of 3)	25445	NM_005497	10052	Hs.712052	NM_005497	ENSG00000182963	GJC1	CX45|GJA7	gap junction protein gamma 1	protein-coding
siCtrl_G9a_GST_peak_4071	chr2	197455912	197456003	+	128	NA	intron (NM_001348768, intron 1 of 28)	intron (NM_001348768, intron 1 of 28)	1750	NM_020760	57520	Hs.633212	NM_020760	ENSG00000138411	HECW2	NDHSAL|NEDL2	HECT, C2 and WW domain containing E3 ubiquitin protein ligase 2	protein-coding
siCtrl_G9a_GST_peak_2907	chr17	966721	967286	+	128	NA	intron (NM_001092, intron 9 of 21)	intron (NM_001092, intron 9 of 21)	15230	NM_001282149	29	Hs.159306	NM_001092	ENSG00000159842	ABR	MDB	ABR activator of RhoGEF and GTPase	protein-coding
siCtrl_G9a_GST_peak_412	chr1	111506736	111507344	+	128	NA	promoter-TSS (NM_018372)	promoter-TSS (NM_018372)	-474	NM_001006945	55791	Hs.25245	NM_018372	ENSG00000121931	LRIF1	C1orf103|HBiX1|RIF1	ligand dependent nuclear receptor interacting factor 1	protein-coding
siCtrl_G9a_GST_peak_3715	chr2	51079117	51079272	+	128	NA	intron (NM_004801, intron 4 of 21)	intron (NM_004801, intron 4 of 21)	-155794	NR_130470	103504737		NR_130470	ENSG00000216191	MIR8485	hsa-mir-8485	microRNA 8485	ncRNA
siCtrl_G9a_GST_peak_394	chr1	108547905	108547968	+	128	NA	Intergenic	THE1C|LTR|ERVL-MaLR	-40134	NM_006113	10451	Hs.267659	NM_006113	ENSG00000134215	VAV3	-	vav guanine nucleotide exchange factor 3	protein-coding
siCtrl_G9a_GST_peak_6144	chr7	25623782	25624138	+	128	NA	Intergenic	Intergenic	78800	NR_157823	646588	Hs.72068	NR_157808	ENSG00000223561	LOC646588	-	uncharacterized LOC646588	ncRNA
siCtrl_G9a_GST_peak_6124	chr7	16627522	16627853	+	128	NA	Intergenic	LTR9|LTR|ERV1	57692	NM_020319	57037	Hs.157378	NM_020319	ENSG00000106524	ANKMY2	ZMYND20	ankyrin repeat and MYND domain containing 2	protein-coding
siCtrl_G9a_GST_peak_829	chr1	210800443	210800602	+	128	NA	intron (NM_018194, intron 11 of 11)	intron (NM_018194, intron 11 of 11)	297812	NM_001170580	55733	Hs.58650	NM_018194	ENSG00000054392	HHAT	MART2|SKI1|Skn	hedgehog acyltransferase	protein-coding
siCtrl_G9a_GST_peak_2000	chr12	106443852	106444112	+	128	NA	Intergenic	THE1B|LTR|ERVL-MaLR	89829	NM_014840	9891	Hs.524692	NM_014840	ENSG00000074590	NUAK1	ARK5	NUAK family kinase 1	protein-coding
siCtrl_G9a_GST_peak_4077	chr2	202017447	202018145	+	128	NA	intron (NR_040030, intron 2 of 6)	intron (NR_040030, intron 2 of 6)	4719	NR_040030	65072	Hs.664613	NR_040030	ENSG00000226312	CFLAR-AS1	ALS2CR10	CFLAR antisense RNA 1	ncRNA
siCtrl_G9a_GST_peak_3583	chr2	30012717	30013218	+	128	NA	intron (NM_004304, intron 1 of 28)	intron (NM_004304, intron 1 of 28)	131485	NM_004304	238	Hs.654469	NM_004304	ENSG00000171094	ALK	CD246|NBLST3	ALK receptor tyrosine kinase	protein-coding
siCtrl_G9a_GST_peak_5743	chr6	78271426	78271866	+	127	NA	Intergenic	THE1B|LTR|ERVL-MaLR	-88345	NM_001282136	101928601	Hs.544538	NM_001282136	ENSG00000269964	MEI4	-	meiotic double-stranded break formation protein 4	protein-coding
siCtrl_G9a_GST_peak_3291	chr18	22007622	22007705	+	127	NA	intron (NM_018439, intron 1 of 10)	intron (NM_018439, intron 1 of 10)	1029	NM_018439	55364	Hs.515317	NM_018439	ENSG00000154059	IMPACT	RWDD5	impact RWD domain protein	protein-coding
siCtrl_G9a_GST_peak_90	chr1	56946940	56947130	+	127	NA	Intergenic	Intergenic	66400	NR_147163	105378744	Hs.183974	NR_147163	ENSG00000223956	LINC01767	-	long intergenic non-protein coding RNA 1767	ncRNA
siCtrl_G9a_GST_peak_3370	chr18	60939244	60939451	+	127	NA	intron (NM_000633, intron 2 of 2)	intron (NM_000633, intron 2 of 2)	47266	NM_000657	596	Hs.150749	NM_000633	ENSG00000171791	BCL2	Bcl-2|PPP1R50	BCL2 apoptosis regulator	protein-coding
siCtrl_G9a_GST_peak_2044	chr12	117041446	117041508	+	127	NA	Intergenic	Intergenic	44291	NM_001085481	643246	Hs.356061	NM_001085481	ENSG00000258102	MAP1LC3B2	ATG8G	microtubule associated protein 1 light chain 3 beta 2	protein-coding
siCtrl_G9a_GST_peak_4770	chr3	122838914	122839033	+	127	NA	intron (NR_028444, intron 8 of 15)	intron (NR_028444, intron 8 of 15)	-41668	NR_106960	102465667		NR_106960	ENSG00000284421	MIR7110	hsa-mir-7110	microRNA 7110	ncRNA
siCtrl_G9a_GST_peak_3289	chr18	20646613	20646909	+	127	NA	Intergenic	Intergenic	-67767	NM_001256438	91768	Hs.11108	NM_138375	ENSG00000134508	CABLES1	CABL1|CABLES|HsT2563|IK3-1	Cdk5 and Abl enzyme substrate 1	protein-coding
siCtrl_G9a_GST_peak_1633	chr12	21612018	21612607	+	127	NA	intron (NM_024854, intron 7 of 11)	MER21B|LTR|ERVL	21463	NM_001350912	79912	Hs.709545	NM_024854	ENSG00000121350	PYROXD1	MFM8	pyridine nucleotide-disulphide oxidoreductase domain 1	protein-coding
siCtrl_G9a_GST_peak_7034	chr9	85920351	85920509	+	127	NA	intron (NM_174938, intron 10 of 13)	MIRb|SINE|MIR	26446	NM_001244961	257019	Hs.127535	NM_174938	ENSG00000172159	FRMD3	4.1O|EPB41L4O|EPB41LO|P410	FERM domain containing 3	protein-coding
siCtrl_G9a_GST_peak_360	chr1	100113664	100114077	+	127	NA	intron (NM_017734, intron 1 of 7)	intron (NM_017734, intron 1 of 7)	2201	NM_017734	54873	Hs.483993	NM_017734	ENSG00000099260	PALMD	C1orf11|PALML	palmdelphin	protein-coding
siCtrl_G9a_GST_peak_6023	chr6	154771248	154771525	+	127	NA	exon (NM_001368117, exon 2 of 13)	exon (NM_001368117, exon 2 of 13)	-16179	NM_001368119	154043	Hs.16064	NM_173515	ENSG00000153721	CNKSR3	CNK3|CNK3/IPCEF1|MAGI1	CNKSR family member 3	protein-coding
siCtrl_G9a_GST_peak_4099	chr2	205832129	205832310	+	127	NA	intron (NM_205863, intron 3 of 21)	L2c|LINE|L2	422021	NM_057177	117583	Hs.657382	NM_057177	ENSG00000116117	PARD3B	ALS2CR19|PAR3B|PAR3L|PAR3beta	par-3 family cell polarity regulator beta	protein-coding
siCtrl_G9a_GST_peak_5898	chr6	119449163	119449286	+	127	NA	intron (NM_001288576, intron 1 of 15)	MER4D0|LTR|ERV1	21134	NM_001288576	79632	Hs.443789	NM_024581	ENSG00000111879	FAM184A	C6orf60	family with sequence similarity 184 member A	protein-coding
siCtrl_G9a_GST_peak_7142	chr9	136453714	136453797	+	127	NA	Intergenic	Intergenic	-8387	NM_001080515	642968	Hs.173134	NM_001080515	ENSG00000196990	FAM163B	C9orf166	family with sequence similarity 163 member B	protein-coding
siCtrl_G9a_GST_peak_705	chr1	185850108	185850294	+	127	NA	intron (NM_031935, intron 4 of 106)	LTR1D|LTR|ERV1	146678	NM_031935	83872	Hs.58877	NM_031935	ENSG00000143341	HMCN1	ARMD1|FBLN6|FIBL-6|FIBL6	hemicentin 1	protein-coding
siCtrl_G9a_GST_peak_315	chr1	94445551	94445673	+	127	NA	Intergenic	Intergenic	-70458	NM_001308253	2730	Hs.315562	NM_002061	ENSG00000023909	GCLM	GLCLR	glutamate-cysteine ligase modifier subunit	protein-coding
siCtrl_G9a_GST_peak_3267	chr18	395358	395506	+	127	NA	intron (NM_130386, intron 2 of 9)	intron (NM_130386, intron 2 of 9)	105269	NM_130386	81035	Hs.464422	NM_030781	ENSG00000158270	COLEC12	CLP1|NSR2|SCARA4|SRCL	collectin subfamily member 12	protein-coding
siCtrl_G9a_GST_peak_3248	chr17	76607426	76607989	+	127	NA	Intergenic	Intergenic	20432	NR_110848	101928710	Hs.464224	NR_110848	ENSG00000267123	SCAT1	LINC02081|XLOC_012582	S-phase cancer associated transcript 1	ncRNA
siCtrl_G9a_GST_peak_3727	chr2	55709574	55709953	+	127	NA	Intergenic	MLT1K|LTR|ERVL-MaLR	-36968	NM_080667	112942	Hs.264208	NM_080667	ENSG00000163001	CFAP36	BARTL1|CCDC104	cilia and flagella associated protein 36	protein-coding
siCtrl_G9a_GST_peak_2387	chr14	81423431	81423516	+	127	NA	intron (NM_000369, intron 1 of 9)	L2c|LINE|L2	1508	NM_000369	7253	Hs.160411	NM_000369	ENSG00000165409	TSHR	CHNG1|LGR3|hTSHR-I	thyroid stimulating hormone receptor	protein-coding
siCtrl_G9a_GST_peak_2843	chr16	49593171	49593581	+	127	NA	intron (NM_001330533, intron 3 of 5)	intron (NM_001330533, intron 3 of 5)	-40880	NR_144553	1596	Hs.684517	NR_144553	ENSG00000260089	ADAM3B	CYRN2	ADAM metallopeptidase domain 3B (pseudogene)	pseudo
siCtrl_G9a_GST_peak_5770	chr6	90676051	90676488	+	126	NA	intron (NM_021813, intron 6 of 8)	intron (NM_021813, intron 6 of 8)	72081	NM_032602	84694	Hs.334499	NM_032602	ENSG00000135355	GJA10	CX62	gap junction protein alpha 10	protein-coding
siCtrl_G9a_GST_peak_957	chr1	226894052	226894508	+	126	NA	intron (NM_002221, intron 2 of 7)	Charlie4z|DNA|hAT-Charlie	-31511	NR_103784	100506443	Hs.664293	NR_103784		ITPKB-IT1	-	ITPKB intronic transcript 1	ncRNA
siCtrl_G9a_GST_peak_6042	chr6	161035043	161035143	+	126	NA	intron (NM_005577, intron 14 of 38)	intron (NM_005577, intron 14 of 38)	50198	NM_005577	4018	Hs.520120	NM_005577	ENSG00000198670	LPA	AK38|APOA|LP	lipoprotein(a)	protein-coding
siCtrl_G9a_GST_peak_6511	chr7	137846402	137846737	+	126	NA	Intergenic	Intergenic	38065	NR_039678	100616226		NR_039678	ENSG00000284028	MIR4468	-	microRNA 4468	ncRNA
siCtrl_G9a_GST_peak_5824	chr6	105730006	105730323	+	126	NA	intron (NM_002726, intron 13 of 14)	intron (NM_002726, intron 13 of 14)	-102275	NM_022361	64208	Hs.458336	NM_022361	ENSG00000132429	POPDC3	POP3|bA355M14.1	popeye domain containing 3	protein-coding
siCtrl_G9a_GST_peak_2112	chr12	131991565	131991629	+	126	NA	Intergenic	Intergenic	141069	NR_146868	105370085	Hs.739274	NR_146868		LINC02414	-	long intergenic non-protein coding RNA 2414	ncRNA
siCtrl_G9a_GST_peak_675	chr1	175099917	175099987	+	126	NA	intron (NM_022093, intron 15 of 18)	intron (NM_022093, intron 15 of 18)	61960	NM_001319231	9674	Hs.518138	NM_014656	ENSG00000235750	KIAA0040	-	KIAA0040	protein-coding
siCtrl_G9a_GST_peak_2547	chr15	56091997	56092396	+	126	NA	Intergenic	Intergenic	-56846	NM_173814	283659	Hs.130957	NM_173814	ENSG00000166450	PRTG	IGDCC5	protogenin	protein-coding
siCtrl_G9a_GST_peak_578	chr1	148240735	148241164	+	126	NA	promoter-TSS (NR_104075)	promoter-TSS (NR_104075)	-516	NR_104075	101954266		NR_104075	ENSG00000207501	RNVU1-14	RNU1-37|vU1.14	RNA, variant U1 small nuclear 14	snRNA
siCtrl_G9a_GST_peak_127	chr1	60496872	60497088	+	126	NA	intron (NM_152377, intron 7 of 11)	intron (NM_152377, intron 7 of 11)	42462	NM_152377	127795	Hs.47385	NM_152377	ENSG00000162598	C1orf87	CREF	chromosome 1 open reading frame 87	protein-coding
siCtrl_G9a_GST_peak_3806	chr2	70851938	70852002	+	125	NA	Intergenic	HERVH-int|LTR|ERV1	-71012	NM_003236	7039	Hs.170009	NM_003236	ENSG00000163235	TGFA	TFGA	transforming growth factor alpha	protein-coding
siCtrl_G9a_GST_peak_6630	chr8	37337941	37338287	+	125	NA	intron (NR_121620, intron 1 of 6)	MIRc|SINE|MIR	13317	NR_121620	100507420	Hs.105962	NR_121620		LINC01605	LincDUSP	long intergenic non-protein coding RNA 1605	ncRNA
siCtrl_G9a_GST_peak_1807	chr12	67310151	67310210	+	125	NA	Intergenic	Intergenic	-112131	NM_001366724	23426	Hs.505946	NM_021150	ENSG00000155974	GRIP1	FRASRS3|GRIP	glutamate receptor interacting protein 1	protein-coding
siCtrl_G9a_GST_peak_2540	chr15	52051003	52051111	+	125	NA	intron (NM_014548, intron 1 of 9)	L2b|LINE|L2	7263	NM_014548	29767	Hs.513734	NM_014548	ENSG00000128872	TMOD2	N-TMOD|NTMOD	tropomodulin 2	protein-coding
siCtrl_G9a_GST_peak_355	chr1	99693253	99693350	+	125	NA	Intergenic	Intergenic	-36547	NM_001166252	9890	Hs.13245	NM_014839	ENSG00000117600	PLPPR4	LPPR4|LPR4|PHP1|PRG-1|PRG1	phospholipid phosphatase related 4	protein-coding
siCtrl_G9a_GST_peak_915	chr1	220671644	220671719	+	125	NA	Intergenic	Intergenic	-29797	NM_018650	4139	Hs.497806	NM_018650	ENSG00000116141	MARK1	MARK|Par-1c|Par1c	microtubule affinity regulating kinase 1	protein-coding
siCtrl_G9a_GST_peak_307	chr1	93794280	93794561	+	125	NA	intron (NR_034089, intron 5 of 8)	MLT1K|LTR|ERVL-MaLR	16948	NR_034089	100131564	Hs.732666	NR_034089		CCDC18-AS1	-	CCDC18 antisense RNA 1	ncRNA
siCtrl_G9a_GST_peak_803	chr1	209658757	209658828	+	125	NA	Intergenic	Intergenic	53314	NR_029622	406988		NR_029622	ENSG00000284485	MIR205	MIRN205|mir-205	microRNA 205	ncRNA
siCtrl_G9a_GST_peak_6618	chr8	36876710	36876785	+	125	NA	Intergenic	Intergenic	-102724	NR_031672	100302233		NR_031672	ENSG00000221641	MIR1268A	MIR1268|MIRN1268|hsa-mir-1268|hsa-mir-1268a	microRNA 1268a	ncRNA
siCtrl_G9a_GST_peak_764	chr1	206510540	206510652	+	125	NA	Intergenic	Intergenic	-5604	NM_015326	23380	Hs.497575	NM_015326	ENSG00000266028	SRGAP2	ARHGAP34|FNBP2|SRGAP2A|SRGAP3	SLIT-ROBO Rho GTPase activating protein 2	protein-coding
siCtrl_G9a_GST_peak_5267	chr5	61086553	61086799	+	125	NA	Intergenic	MLT1F|LTR|ERVL-MaLR	-55151	NR_105000	100506526	Hs.662277	NR_105000		C5orf64-AS1	-	C5orf64 antisense RNA 1	ncRNA
siCtrl_G9a_GST_peak_3226	chr17	71151465	71151623	+	125	NA	Intergenic	Intergenic	-9605	NM_001050	6752	Hs.514451	NM_001050	ENSG00000180616	SSTR2	-	somatostatin receptor 2	protein-coding
siCtrl_G9a_GST_peak_657	chr1	168660840	168661021	+	125	NA	Intergenic	Intergenic	37514	NM_001937	1805	Hs.80552	NM_001937	ENSG00000143196	DPT	TRAMP	dermatopontin	protein-coding
siCtrl_G9a_GST_peak_5416	chr5	142252416	142252535	+	125	NA	intron (NM_001349547, intron 1 of 21)	intron (NM_001349547, intron 1 of 21)	-4000	NR_046680	100874239	Hs.570896	NR_046680	ENSG00000226272	ARHGAP26-AS1	-	ARHGAP26 antisense RNA 1	ncRNA
siCtrl_G9a_GST_peak_3855	chr2	84565216	84565286	+	125	NA	Intergenic	Intergenic	47445	NR_003663	388965	Hs.664098	NM_001013648		FUNDC2P2	-	FUN14 domain containing 2 pseudogene 2	pseudo
siCtrl_G9a_GST_peak_3394	chr19	382551	382663	+	124	NA	Intergenic	Intergenic	-6581	NM_016585	51298	Hs.250002	NM_016585	ENSG00000105549	THEG	CT56|THEG1	theg spermatid protein	protein-coding
siCtrl_G9a_GST_peak_1702	chr12	39786922	39787197	+	124	NA	intron (NM_001173465, intron 1 of 33)	LTR16D|LTR|ERVL	49863	NM_017641	55605	Hs.374201	NM_017641	ENSG00000139116	KIF21A	CFEOM1|FEOM1|FEOM3A	kinesin family member 21A	protein-coding
siCtrl_G9a_GST_peak_2127	chr13	24298379	24298519	+	124	NA	Intergenic	MLT2B1|LTR|ERVL	144950	NM_018647	55504	Hs.149168	NM_018647	ENSG00000127863	TNFRSF19	TAJ|TAJ-alpha|TRADE|TROY	TNF receptor superfamily member 19	protein-coding
siCtrl_G9a_GST_peak_5566	chr6	15399798	15400362	+	124	NA	intron (NM_004973, intron 2 of 17)	intron (NM_004973, intron 2 of 17)	150994	NM_001267040	3720	Hs.269059	NM_004973	ENSG00000008083	JARID2	JMJ	jumonji and AT-rich interaction domain containing 2	protein-coding
siCtrl_G9a_GST_peak_1339	chr11	10531178	10531245	+	124	NA	promoter-TSS (NM_001190702)	promoter-TSS (NM_001190702)	-478	NM_001190702	100463486		NM_001190702	ENSG00000255823	MTRNR2L8	HN8	MT-RNR2 like 8	protein-coding
siCtrl_G9a_GST_peak_5649	chr6	38698073	38698167	+	124	NA	intron (NM_001206927, intron 4 of 92)	intron (NM_001206927, intron 4 of 92)	15033	NM_001206927	1769	Hs.520106	NM_001371	ENSG00000124721	DNAH8	ATPase|hdhc9	dynein axonemal heavy chain 8	protein-coding
siCtrl_G9a_GST_peak_1065	chr10	8267274	8267609	+	124	NA	Intergenic	Intergenic	42827	NR_108058	100507143	Hs.258979	NR_108058	ENSG00000232170	LINC00708	GS1-756B1.2	long intergenic non-protein coding RNA 708	ncRNA
siCtrl_G9a_GST_peak_4785	chr3	124791063	124791562	+	124	NA	Intergenic	Intergenic	-16471	NM_020733	57493	Hs.477420	NM_020733	ENSG00000173706	HEG1	HEG|MST112|MSTP112	heart development protein with EGF like domains 1	protein-coding
siCtrl_G9a_GST_peak_3665	chr2	45344614	45345057	+	124	NA	Intergenic	Intergenic	-108244	NM_016932	10736	Hs.101937	NM_016932	ENSG00000170577	SIX2	-	SIX homeobox 2	protein-coding
siCtrl_G9a_GST_peak_565	chr1	145096309	145096428	+	124	NA	promoter-TSS (NM_004892)	promoter-TSS (NM_004892)	-40	NM_004892	9554	Hs.632438	NM_004892	ENSG00000265808	SEC22B	ERS-24|SEC22L1	SEC22 homolog B, vesicle trafficking protein (gene/pseudogene)	protein-coding
siCtrl_G9a_GST_peak_4033	chr2	175352061	175352414	+	124	NA	promoter-TSS (NM_001267051)	promoter-TSS (NM_001267051)	-421	NM_001267051	151556	Hs.516604	NM_152529	ENSG00000163328	GPR155	DEP.7|DEPDC3|PGR22	G protein-coupled receptor 155	protein-coding
siCtrl_G9a_GST_peak_2105	chr12	130864136	130864325	+	124	NA	Intergenic	Intergenic	41798	NM_001190971	9271	Hs.405659	NM_004764	ENSG00000125207	PIWIL1	CT80.1|HIWI|MIWI|PIWI	piwi like RNA-mediated gene silencing 1	protein-coding
siCtrl_G9a_GST_peak_5647	chr6	37705564	37705969	+	124	NA	Intergenic	Intergenic	-40107	NM_153487	266727	Hs.437993	NM_153487	ENSG00000112139	MDGA1	GPIM|MAMDC3	MAM domain containing glycosylphosphatidylinositol anchor 1	protein-coding
siCtrl_G9a_GST_peak_3690	chr2	47466196	47466334	+	123	NA	intron (NR_110207, intron 1 of 2)	intron (NR_110207, intron 1 of 2)	-62190	NM_001305625	805	Hs.468442	NM_001743	ENSG00000143933	CALM2	CALM|CALML2|CAM1|CAM3|CAMC|CAMII|CAMIII|LQT15|PHKD|PHKD2|caM	calmodulin 2	protein-coding
siCtrl_G9a_GST_peak_1303	chr10	125531297	125531626	+	123	NA	intron (NM_198148, intron 7 of 13)	THE1C|LTR|ERVL-MaLR	105590	NM_153442	2849	Hs.12751	NM_153442	ENSG00000154478	GPR26	-	G protein-coupled receptor 26	protein-coding
siCtrl_G9a_GST_peak_1384	chr11	21653703	21653816	+	123	NA	Intergenic	LTR16D|LTR|ERVL	-560872	NM_001142649	203859	Hs.154329	NM_213599	ENSG00000171714	ANO5	GDD1|LGMD2L|LGMDR12|TMEM16E	anoctamin 5	protein-coding
siCtrl_G9a_GST_peak_5934	chr6	131151855	131151939	+	123	NA	intron (NM_001195597, intron 1 of 1)	MER41A|LTR|ERV1	3352	NM_001195597	100507203	Hs.388715	NM_001195597	ENSG00000256162	SMLR1	-	small leucine rich protein 1	protein-coding
siCtrl_G9a_GST_peak_1575	chr12	2585354	2585533	+	123	NA	intron (NM_001167623, intron 5 of 46)	intron (NM_001167623, intron 5 of 46)	195943	NR_046579	100874235	Hs.667644	NR_046579	ENSG00000256271	CACNA1C-AS2	-	CACNA1C antisense RNA 2	ncRNA
siCtrl_G9a_GST_peak_4705	chr3	73238448	73238617	+	123	NA	Intergenic	MIRb|SINE|MIR	127722	NM_018029	55096	Hs.658858	NM_018029	ENSG00000255423	EBLN2	EBLN-2	endogenous Bornavirus like nucleoprotein 2	protein-coding
siCtrl_G9a_GST_peak_1755	chr12	55459410	55459478	+	123	NA	Intergenic	Intergenic	45686	NM_021191	58158	Hs.591024	NM_021191	ENSG00000123307	NEUROD4	ATH-3|ATH3|Atoh3|MATH-3|MATH3|bHLHa4	neuronal differentiation 4	protein-coding
siCtrl_G9a_GST_peak_173	chr1	62695643	62695949	+	123	NA	Intergenic	Intergenic	35275	NM_001164835	54596	Hs.685462	NM_019079	ENSG00000240563	L1TD1	ECAT11	LINE1 type transposase domain containing 1	protein-coding
siCtrl_G9a_GST_peak_2652	chr15	81114177	81114300	+	123	NA	intron (NM_018689, intron 1 of 28)	intron (NM_018689, intron 1 of 28)	20176	NR_030393	693132		NR_030393	ENSG00000208003	MIR549A	MIR549|MIRN549|hsa-mir-549|hsa-mir-549a|mir-549a	microRNA 549a	ncRNA
siCtrl_G9a_GST_peak_247	chr1	77043312	77043442	+	123	NA	TTS (NM_001160011)	TTS (NM_001160011)	201575	NR_149059	110806286		NR_149059	ENSG00000237552	LINC02567	-	long intergenic non-protein coding RNA 2567	ncRNA
siCtrl_G9a_GST_peak_235	chr1	75403062	75403236	+	123	NA	Intergenic	Intergenic	-190970	NM_001001933	431707	Hs.403934	NM_001001933	ENSG00000162624	LHX8	LHX7	LIM homeobox 8	protein-coding
siCtrl_G9a_GST_peak_2309	chr14	19917269	19917355	+	123	NA	intron (NR_122112, intron 6 of 7).2	intron (NR_122112, intron 6 of 7).2	8017	NR_122112	503638	Hs.474095	NR_122111		DUXAP9	LINC01296	double homeobox A pseudogene 9	pseudo
siCtrl_G9a_GST_peak_2512	chr15	48098176	48098398	+	123	NA	intron (NR_120336, intron 3 of 4)	intron (NR_120336, intron 3 of 4)	40146	NR_120336	101928442	Hs.242804	NR_120336	ENSG00000259572	LINC01491	-	long intergenic non-protein coding RNA 1491	ncRNA
siCtrl_G9a_GST_peak_3597	chr2	37781355	37781702	+	123	NA	Intergenic	Intergenic	117814	NM_006449	10602	Hs.369574	NM_006449	ENSG00000163171	CDC42EP3	BORG2|CEP3|UB1	CDC42 effector protein 3	protein-coding
siCtrl_G9a_GST_peak_5103	chr4	152445687	152445832	+	123	NA	intron (NM_001109977, intron 3 of 13)	intron (NM_001109977, intron 3 of 13)	115431	NM_001348694	729830	Hs.633810	NM_001109977	ENSG00000164142	FAM160A1	-	family with sequence similarity 160 member A1	protein-coding
siCtrl_G9a_GST_peak_4339	chr20	46279830	46279889	+	123	NA	exon (NM_181659, exon 20 of 23)	exon (NM_181659, exon 20 of 23)	134949	NM_018837	55959	Hs.162016	NM_018837	ENSG00000196562	SULF2	HSULF-2	sulfatase 2	protein-coding
siCtrl_G9a_GST_peak_1789	chr12	66459933	66460201	+	123	NA	Intergenic	AmnSINE1|SINE|Deu	-35221	NR_146530	105369810		NR_146530	ENSG00000256259	LINC02425	-	long intergenic non-protein coding RNA 2425	ncRNA
siCtrl_G9a_GST_peak_2640	chr15	76686188	76686302	+	122	NA	intron (NR_148227, intron 28 of 32)	MLT1G1|LTR|ERVL-MaLR	57131	NM_145805	64843	Hs.444677	NM_145805	ENSG00000159556	ISL2	-	ISL LIM homeobox 2	protein-coding
siCtrl_G9a_GST_peak_84	chr1	56847477	56847635	+	122	NA	Intergenic	Intergenic	-33079	NR_147163	105378744	Hs.183974	NR_147163	ENSG00000223956	LINC01767	-	long intergenic non-protein coding RNA 1767	ncRNA
siCtrl_G9a_GST_peak_135	chr1	60527565	60527674	+	122	NA	intron (NM_152377, intron 2 of 11)	AluJr|SINE|Alu	11823	NM_152377	127795	Hs.47385	NM_152377	ENSG00000162598	C1orf87	CREF	chromosome 1 open reading frame 87	protein-coding
siCtrl_G9a_GST_peak_2939	chr17	15522825	15523038	+	122	NA	promoter-TSS (NM_006382)	promoter-TSS (NM_006382)	87	NM_001282540	374286	Hs.548021	NM_006382	ENSG00000241322	CDRT1	C170RF1|C17ORF1|C17ORF1A|FBXW10B|FBXW10P1|HREP|SM25H2	CMT1A duplicated region transcript 1	protein-coding
siCtrl_G9a_GST_peak_2578	chr15	62825965	62826758	+	122	NA	Intergenic	MER21C|LTR|ERVL	111019	NR_026897	197003	Hs.352253	NM_152648	ENSG00000259458	MGC15885	-	uncharacterized protein MGC15885	ncRNA
siCtrl_G9a_GST_peak_2703	chr15	88787782	88787964	+	121	NA	intron (NM_001007156, intron 3 of 15)	intron (NM_001007156, intron 3 of 15)	-8088	NR_038229	283738	Hs.578429	NR_038229	ENSG00000260305	NTRK3-AS1	-	NTRK3 antisense RNA 1	ncRNA
siCtrl_G9a_GST_peak_6365	chr7	80506209	80506416	+	121	NA	intron (NM_001350120, intron 2 of 17)	intron (NM_001350120, intron 2 of 17)	42055	NM_006379	10512	Hs.269109	NM_006379	ENSG00000075223	SEMA3C	SEMAE|SemE	semaphorin 3C	protein-coding
siCtrl_G9a_GST_peak_5551	chr6	11217701	11217781	+	121	NA	intron (NM_001142393, intron 2 of 7)	intron (NM_001142393, intron 2 of 7)	15160	NM_006403	4739	Hs.37982	NM_006403	ENSG00000111859	NEDD9	CAS-L|CAS2|CASL|CASS2|HEF1	neural precursor cell expressed, developmentally down-regulated 9	protein-coding
siCtrl_G9a_GST_peak_3662	chr2	45276740	45276994	+	121	NA	Intergenic	Eulor12|DNA?|DNA?	-40276	NM_016932	10736	Hs.101937	NM_016932	ENSG00000170577	SIX2	-	SIX homeobox 2	protein-coding
siCtrl_G9a_GST_peak_344	chr1	96630604	96630882	+	121	NA	Intergenic	Intergenic	173119	NR_125991	102723661	Hs.143911	NR_125991	ENSG00000237435	LINC02790	-	long intergenic non-protein coding RNA 2790	ncRNA
siCtrl_G9a_GST_peak_3769	chr2	66297403	66297517	+	121	NA	Intergenic	Intergenic	288000	NR_039938	100616464		NR_039938	ENSG00000264525	MIR4778	-	microRNA 4778	ncRNA
siCtrl_G9a_GST_peak_5865	chr6	112372938	112372998	+	121	NA	Intergenic	L1P2|LINE|L1	-2310	NM_003880	8838	Hs.558428	NM_003880	ENSG00000112761	CCN6	LIBC|PPAC|PPD|WISP-3|WISP3	cellular communication network factor 6	protein-coding
siCtrl_G9a_GST_peak_85	chr1	56848778	56848979	+	121	NA	Intergenic	Intergenic	-31757	NR_147163	105378744	Hs.183974	NR_147163	ENSG00000223956	LINC01767	-	long intergenic non-protein coding RNA 1767	ncRNA
siCtrl_G9a_GST_peak_5565	chr6	15390403	15390682	+	121	NA	intron (NM_004973, intron 2 of 17)	intron (NM_004973, intron 2 of 17)	141456	NM_001267040	3720	Hs.269059	NM_004973	ENSG00000008083	JARID2	JMJ	jumonji and AT-rich interaction domain containing 2	protein-coding
siCtrl_G9a_GST_peak_3825	chr2	75303588	75303843	+	121	NA	intron (NM_015727, intron 2 of 3)	intron (NM_015727, intron 2 of 3)	-14224	NR_049796	100846995		NR_049796	ENSG00000263909	MIR5000	-	microRNA 5000	ncRNA
siCtrl_G9a_GST_peak_1115	chr10	35563038	35563398	+	121	NA	intron (NM_181698, intron 3 of 11)	THE1B|LTR|ERVL-MaLR	27265	NM_181698	219771	Hs.14745	NM_145012	ENSG00000108100	CCNY	C10orf9|CBCP1|CCNX|CFP1	cyclin Y	protein-coding
siCtrl_G9a_GST_peak_3340	chr18	48277486	48277771	+	121	NA	Intergenic	MIRc|SINE|MIR	68758	NM_001127175	83876	Hs.30495	NM_031939	ENSG00000134042	MRO	B29|C18orf3	maestro	protein-coding
siCtrl_G9a_GST_peak_6850	chr8	138839968	138840027	+	121	NA	intron (NR_161374, intron 5 of 7)	HERVH-int|LTR|ERV1	255791	NR_161374	401478	Hs.654931	NM_001354876		LOC401478	-	uncharacterized LOC401478	ncRNA
siCtrl_G9a_GST_peak_3456	chr2	5149676	5149739	+	121	NA	Intergenic	Intergenic	-445895	NR_034134	727982	Hs.444391	NR_034134	ENSG00000231532	LINC01249	-	long intergenic non-protein coding RNA 1249	ncRNA
siCtrl_G9a_GST_peak_6328	chr7	69348655	69348860	+	121	NA	intron (NM_001127232, intron 1 of 4)	intron (NM_001127232, intron 1 of 4)	285296	NM_001127231	26053	Hs.21631	NM_015570	ENSG00000158321	AUTS2	FBRSL2|MRD26	activator of transcription and developmental regulator AUTS2	protein-coding
siCtrl_G9a_GST_peak_175	chr1	62776751	62776855	+	121	NA	intron (NM_181712, intron 1 of 9)	intron (NM_181712, intron 1 of 9)	8302	NM_181712	163782	Hs.283398	NM_181712	ENSG00000132854	KANK4	ANKRD38|dJ1078M7.1	KN motif and ankyrin repeat domains 4	protein-coding
siCtrl_G9a_GST_peak_2087	chr12	127291909	127292132	+	121	NA	Intergenic	Intergenic	-35212	NR_033878	387895	Hs.534660	NR_033878		LINC00944	-	long intergenic non-protein coding RNA 944	ncRNA
siCtrl_G9a_GST_peak_5842	chr6	108078306	108078397	+	121	NA	intron (NM_001286408, intron 1 of 6)	intron (NM_001286408, intron 1 of 6)	-24997	NM_001286409	256380	Hs.486109	NM_198081	ENSG00000146285	SCML4	dJ47M23.1	Scm polycomb group protein like 4	protein-coding
siCtrl_G9a_GST_peak_4577	chr3	15547023	15547447	+	121	NA	intron (NM_005677, intron 1 of 16)	intron (NM_005677, intron 1 of 16)	-6856	NM_080538	8292	Hs.146735	NM_005677	ENSG00000206561	COLQ	CMS5|EAD	collagen like tail subunit of asymmetric acetylcholinesterase	protein-coding
siCtrl_G9a_GST_peak_2404	chr14	91345625	91345799	+	121	NA	intron (NM_001322233, intron 13 of 15)	ERVL-E-int|LTR|ERVL	-62938	NM_001010854	145567	Hs.655697	NM_001010854	ENSG00000165914	TTC7B	TTC7L1|c14_5685	tetratricopeptide repeat domain 7B	protein-coding
siCtrl_G9a_GST_peak_4561	chr3	9265273	9265455	+	120	NA	intron (NM_014850, intron 1 of 21)	intron (NM_014850, intron 1 of 21)	6785	NR_103443	100288831	Hs.694646	NR_103443	ENSG00000227929	SRGAP3-AS3	-	SRGAP3 antisense RNA 3	ncRNA
siCtrl_G9a_GST_peak_1669	chr12	29369330	29369412	+	120	NA	intron (NM_001271783, intron 1 of 11)	intron (NM_001271783, intron 1 of 11)	-7228	NM_001271784	55711	Hs.684482	NM_018099	ENSG00000064763	FAR2	HEL-S-81|MLSTD1|SDR10E2	fatty acyl-CoA reductase 2	protein-coding
siCtrl_G9a_GST_peak_6278	chr7	47819230	47819424	+	120	NA	intron (NM_138295, intron 56 of 56)	intron (NM_138295, intron 56 of 56)	-15562	NR_161269	80099	Hs.287647	NM_025031		C7orf69	-	chromosome 7 open reading frame 69	ncRNA
siCtrl_G9a_GST_peak_4977	chr4	49333489	49333593	+	120	NA	Intergenic	L1MB8|LINE|L1	344882	NM_001286791	80157	Hs.479703	NM_025087	ENSG00000109182	CWH43	CWH43-C|PGAP2IP	cell wall biogenesis 43 C-terminal homolog	protein-coding
siCtrl_G9a_GST_peak_4346	chr20	46699510	46699688	+	120	NA	Intergenic	Intergenic	-80738	NR_110027	101927457	Hs.445823	NR_110027		LINC01522	-	long intergenic non-protein coding RNA 1522	ncRNA
siCtrl_G9a_GST_peak_983	chr1	232172026	232172260	+	120	NA	intron (NM_018662, intron 12 of 12)	intron (NM_018662, intron 12 of 12)	110563	NR_126441	104472714		NR_126441	ENSG00000226758	DISC1-IT1	-	DISC1 intronic transcript 1	ncRNA
siCtrl_G9a_GST_peak_1119	chr10	36965319	36965592	+	120	NA	Intergenic	Intergenic	-449330	NM_052997	91074	Hs.373787	NM_052997	ENSG00000148513	ANKRD30A	NY-BR-1	ankyrin repeat domain 30A	protein-coding
siCtrl_G9a_GST_peak_6634	chr8	37819793	37820098	+	120	NA	TTS (NM_000025)	TTS (NM_000025)	4172	NM_000025	155	Hs.2549	NM_000025	ENSG00000188778	ADRB3	BETA3AR	adrenoceptor beta 3	protein-coding
siCtrl_G9a_GST_peak_628	chr1	165438054	165438183	+	120	NA	Intergenic	MamGypLTR3|LTR|Gypsy	-23526	NM_001256570	6258	Hs.26550	NM_006917	ENSG00000143171	RXRG	NR2B3|RXRC	retinoid X receptor gamma	protein-coding
siCtrl_G9a_GST_peak_6063	chr6	162489492	162489776	+	120	NA	intron (NM_004562, intron 4 of 11)	MLT1E1|LTR|ERVL-MaLR	597625	NR_134594	105378098	Hs.691066	NR_134593		LOC105378098	-	uncharacterized LOC105378098	ncRNA
siCtrl_G9a_GST_peak_4133	chr2	209421982	209422170	+	120	NA	intron (NR_136588, intron 1 of 5)	LTR8A|LTR|ERV1	14709	NR_136588	101927960	Hs.159960	NR_136588		LOC101927960	-	uncharacterized LOC101927960	ncRNA
siCtrl_G9a_GST_peak_4072	chr2	197615397	197615630	+	120	NA	Intergenic	Intergenic	37251	NM_001353340	284992	Hs.132519	NM_173466	ENSG00000144395	CCDC150	-	coiled-coil domain containing 150	protein-coding
siCtrl_G9a_GST_peak_2653	chr15	81114397	81114661	+	120	NA	intron (NM_018689, intron 1 of 28)	intron (NM_018689, intron 1 of 28)	19885	NR_030393	693132		NR_030393	ENSG00000208003	MIR549A	MIR549|MIRN549|hsa-mir-549|hsa-mir-549a|mir-549a	microRNA 549a	ncRNA
siCtrl_G9a_GST_peak_5635	chr6	35705493	35705783	+	120	NA	promoter-TSS (NR_027117)	promoter-TSS (NR_027117)	829	NM_145028	221481	Hs.533066	NM_145028	ENSG00000157343	ARMC12	C6orf81	armadillo repeat containing 12	protein-coding
siCtrl_G9a_GST_peak_1411	chr11	36615851	36616094	+	120	NA	promoter-TSS (NM_001276727)	promoter-TSS (NM_001276727)	-71	NR_077243	119710	Hs.159376	NM_138787	ENSG00000166352	C11orf74	HEPIS|NWC	chromosome 11 open reading frame 74	protein-coding
siCtrl_G9a_GST_peak_441	chr1	116907425	116907881	+	120	NA	Intergenic	Intergenic	-8213	NM_000701	476	Hs.371889	NM_000701	ENSG00000163399	ATP1A1	CMT2DD|HOMGSMR2	ATPase Na+/K+ transporting subunit alpha 1	protein-coding
siCtrl_G9a_GST_peak_3950	chr2	133041335	133041410	+	119	NA	Intergenic	MER21B|LTR|ERVL	-20993	NM_001355461	646915		NM_001304449		ZNF806	-	zinc finger protein 806	protein-coding
siCtrl_G9a_GST_peak_3061	chr17	52871725	52871863	+	119	NA	Intergenic	LTR19C|LTR|ERV1	-106258	NM_001321175	10040	Hs.153504	NM_005486	ENSG00000141198	TOM1L1	SRCASM	target of myb1 like 1 membrane trafficking protein	protein-coding
siCtrl_G9a_GST_peak_1284	chr10	120609949	120610062	+	119	NA	Intergenic	Intergenic	-95523	NM_153810	143384	Hs.420024	NM_153810	ENSG00000151893	CACUL1	C10orf46|CAC1	CDK2 associated cullin domain 1	protein-coding
siCtrl_G9a_GST_peak_2726	chr15	92972852	92972914	+	119	NA	intron (NM_001330416, intron 1 of 4)	intron (NM_001330416, intron 1 of 4)	35766	NM_001330416	8128	Hs.302341	NM_006011	ENSG00000140557	ST8SIA2	HsT19690|SIAT8-B|SIAT8B|ST8SIA-II|ST8SiaII|STX	ST8 alpha-N-acetyl-neuraminide alpha-2,8-sialyltransferase 2	protein-coding
siCtrl_G9a_GST_peak_4523	chr22	29303356	29303637	+	119	NA	intron (NM_001206998, intron 1 of 8)	intron (NM_001206998, intron 1 of 8)	-9881	NM_032173	84133	Hs.604200	NM_032173	ENSG00000183579	ZNRF3	BK747E2.3|RNF203	zinc and ring finger 3	protein-coding
siCtrl_G9a_GST_peak_3462	chr2	5549898	5550256	+	119	NA	Intergenic	Intergenic	281173	NR_110580	102723818	Hs.128107	NR_110580		LINC01248	-	long intergenic non-protein coding RNA 1248	ncRNA
siCtrl_G9a_GST_peak_3551	chr2	23024066	23024354	+	119	NA	Intergenic	MER41B|LTR|ERV1	264859	NR_110577	102723362	Hs.502887	NR_110577	ENSG00000233587	LINC01884	-	long intergenic non-protein coding RNA 1884	ncRNA
siCtrl_G9a_GST_peak_2417	chr14	97221006	97221172	+	119	NA	intron (NR_146552, intron 3 of 3)	intron (NR_146552, intron 3 of 3)	13561	NR_146552	105370646		NR_146552	ENSG00000258979	LINC02299	-	long intergenic non-protein coding RNA 2299	ncRNA
siCtrl_G9a_GST_peak_6937	chr9	38200471	38200704	+	119	NA	Intergenic	Intergenic	-131363	NM_003028	6461	Hs.521482	NM_003028	ENSG00000107338	SHB	bA3J10.2	SH2 domain containing adaptor protein B	protein-coding
siCtrl_G9a_GST_peak_1662	chr12	27396609	27396891	+	119	NA	promoter-TSS (NM_015000)	promoter-TSS (NM_015000)	-469	NM_015000	23012	Hs.184523	NM_015000	ENSG00000211455	STK38L	NDR2	serine/threonine kinase 38 like	protein-coding
siCtrl_G9a_GST_peak_5593	chr6	20691262	20691611	+	118	NA	intron (NM_017774, intron 5 of 15)	intron (NM_017774, intron 5 of 15)	156748	NM_017774	54901	Hs.657604	NM_017774	ENSG00000145996	CDKAL1	-	CDK5 regulatory subunit associated protein 1 like 1	protein-coding
siCtrl_G9a_GST_peak_4248	chr20	15740885	15740944	+	118	NA	intron (NM_001351661, intron 8 of 17)	intron (NM_001351661, intron 8 of 17)	163045	NR_130925	613266	Hs.309149	NR_130924		LOC613266	-	uncharacterized LOC613266	ncRNA
siCtrl_G9a_GST_peak_5868	chr6	112470884	112471135	+	118	NA	intron (NM_001105206, intron 17 of 38)	intron (NM_001105206, intron 17 of 38)	62215	NM_001033564	619208	Hs.591340	NM_001033564	ENSG00000203778	FAM229B	C6orf225	family with sequence similarity 229 member B	protein-coding
siCtrl_G9a_GST_peak_2181	chr13	44905936	44906281	+	118	NA	Intergenic	Intergenic	-41678	NM_001346980	387923	Hs.377972	NM_001010897	ENSG00000151778	SERP2	C13orf21|bA269C23.1	stress associated endoplasmic reticulum protein family member 2	protein-coding
siCtrl_G9a_GST_peak_1850	chr12	69250533	69250707	+	118	NA	intron (NM_198320, intron 8 of 8)	intron (NM_198320, intron 8 of 8)	47816	NM_001145337	4193	Hs.484551	NM_002392	ENSG00000135679	MDM2	ACTFS|HDMX|hdm2	MDM2 proto-oncogene	protein-coding
siCtrl_G9a_GST_peak_3822	chr2	75234605	75234688	+	118	NA	Intergenic	MLT1L|LTR|ERVL-MaLR	48876	NM_019896	56655	Hs.469060	NM_019896	ENSG00000115350	POLE4	YHHQ1|p12	DNA polymerase epsilon 4, accessory subunit	protein-coding
siCtrl_G9a_GST_peak_950	chr1	224101544	224102089	+	118	NA	Intergenic	Intergenic	-68142	NM_005426	7159	Hs.523968	NM_005426	ENSG00000143514	TP53BP2	53BP2|ASPP2|BBP|P53BP2|PPP1R13A	tumor protein p53 binding protein 2	protein-coding
siCtrl_G9a_GST_peak_6249	chr7	41926798	41926943	+	118	NA	Intergenic	Intergenic	-184182	NM_002192	3624	Hs.28792	NM_002192	ENSG00000122641	INHBA	EDF|FRP	inhibin subunit beta A	protein-coding
siCtrl_G9a_GST_peak_4308	chr20	32783197	32783326	+	118	NA	Intergenic	Intergenic	-64910	NM_001672	434	Hs.659995	NM_001672	ENSG00000101440	ASIP	AGSW|AGTI|AGTIL|ASP|SHEP9	agouti signaling protein	protein-coding
siCtrl_G9a_GST_peak_6541	chr7	153865200	153865343	+	118	NA	intron (NM_001290253, intron 1 of 5)	intron (NM_001290253, intron 1 of 5)	-107616	NR_136254	101929998	Hs.689473	NR_136254		LOC101929998	-	uncharacterized LOC101929998	ncRNA
siCtrl_G9a_GST_peak_1798	chr12	66793375	66793509	+	118	NA	intron (NM_021150, intron 15 of 23)	intron (NM_021150, intron 15 of 23)	97117	NR_135080	92797	Hs.505941	NM_033647	ENSG00000127311	HELB	DHB|hDHB	DNA helicase B	protein-coding
siCtrl_G9a_GST_peak_3099	chr17	54756732	54756825	+	118	NA	Intergenic	Intergenic	85718	NM_005450	9241	Hs.248201	NM_005450	ENSG00000183691	NOG	SYM1|SYNS1|SYNS1A	noggin	protein-coding
siCtrl_G9a_GST_peak_3664	chr2	45344216	45344508	+	118	NA	Intergenic	Intergenic	-107771	NM_016932	10736	Hs.101937	NM_016932	ENSG00000170577	SIX2	-	SIX homeobox 2	protein-coding
siCtrl_G9a_GST_peak_2711	chr15	90000417	90000491	+	118	NA	Intergenic	MLT1J|LTR|ERVL-MaLR	39360	NR_110261	51458	Hs.459284	NM_016321	ENSG00000140519	RHCG	C15orf6|PDRC2|RHGK|SLC42A3	Rh family C glycoprotein	protein-coding
siCtrl_G9a_GST_peak_427	chr1	114566183	114566243	+	118	NA	Intergenic	LTR9|LTR|ERV1	44117	NM_001286352	56944	Hs.9315	NM_020190	ENSG00000116774	OLFML3	HNOEL-iso|OLF44	olfactomedin like 3	protein-coding
siCtrl_G9a_GST_peak_6265	chr7	42495921	42496068	+	118	NA	Intergenic	Intergenic	-219186	NM_000168	2737	Hs.21509	NM_000168	ENSG00000106571	GLI3	ACLS|GCPS|GLI3-190|GLI3FL|PAP-A|PAPA|PAPA1|PAPB|PHS|PPDIV	GLI family zinc finger 3	protein-coding
siCtrl_G9a_GST_peak_1050	chr1	243171890	243172080	+	118	NA	Intergenic	AluSz6|SINE|Alu	93061	NR_029401	731275	Hs.722350	NR_029401	ENSG00000214837	LINC01347	-	long intergenic non-protein coding RNA 1347	ncRNA
siCtrl_G9a_GST_peak_2501	chr15	47806043	47806379	+	118	NA	intron (NM_001198999, intron 3 of 19)	intron (NM_001198999, intron 3 of 19)	-203491	NM_001358351	80031	Hs.511265	NM_020858	ENSG00000137872	SEMA6D	-	semaphorin 6D	protein-coding
siCtrl_G9a_GST_peak_2045	chr12	117041586	117041806	+	118	NA	Intergenic	Intergenic	44510	NM_001085481	643246	Hs.356061	NM_001085481	ENSG00000258102	MAP1LC3B2	ATG8G	microtubule associated protein 1 light chain 3 beta 2	protein-coding
siCtrl_G9a_GST_peak_6991	chr9	71107311	71107542	+	117	NA	intron (NM_021965, intron 9 of 10)	intron (NM_021965, intron 9 of 10)	48357	NM_153237	169693	Hs.663056	NM_153237	ENSG00000181778	TMEM252	C9orf71	transmembrane protein 252	protein-coding
siCtrl_G9a_GST_peak_710	chr1	189238307	189238387	+	117	NA	Intergenic	LTR25-int|LTR|ERV1	1206793	NM_001317188	339479	Hs.65765	NM_199051	ENSG00000162670	BRINP3	DBCCR1L|DBCCR1L1|FAM5C	BMP/retinoic acid inducible neural specific 3	protein-coding
siCtrl_G9a_GST_peak_4798	chr3	132910744	132910877	+	117	NA	intron (NM_001282865, intron 1 of 3)	intron (NM_001282865, intron 1 of 3)	65155	NR_110812	101927455	Hs.570550	NR_110812	ENSG00000251011	TMEM108-AS1	-	TMEM108 antisense RNA 1	ncRNA
siCtrl_G9a_GST_peak_5304	chr5	73335842	73335940	+	117	NA	Intergenic	LTR16A|LTR|ERVL	226520	NM_001244364	64283	Hs.482521	NM_001080479	ENSG00000214944	ARHGEF28	RGNEF|RIP2|p190RHOGEF	Rho guanine nucleotide exchange factor 28	protein-coding
siCtrl_G9a_GST_peak_5428	chr5	146027395	146027454	+	117	NA	intron (NM_001271948, intron 6 of 9)	intron (NM_001271948, intron 6 of 9)	-131748	NM_194251	134391	Hs.483732	NM_194251	ENSG00000173250	GPR151	GALR4|GALRL|GPCR|GPCR-2037|PGR7	G protein-coupled receptor 151	protein-coding
siCtrl_G9a_GST_peak_2876	chr16	62270879	62270956	+	117	NA	Intergenic	MSTA|LTR|ERVL-MaLR	-200575	NM_001796	1006	Hs.368322	NM_001796	ENSG00000150394	CDH8	Nbla04261	cadherin 8	protein-coding
siCtrl_G9a_GST_peak_7143	chr9	136492183	136492584	+	117	NA	Intergenic	Intergenic	-9102	NM_000787	1621	Hs.591890	NM_000787	ENSG00000123454	DBH	DBM|ORTHYP1	dopamine beta-hydroxylase	protein-coding
siCtrl_G9a_GST_peak_3310	chr18	38250890	38251179	+	117	NA	Intergenic	Intergenic	604784	NR_110791	101927900	Hs.385522	NR_110791	ENSG00000261715	LINC01477	-	long intergenic non-protein coding RNA 1477	ncRNA
siCtrl_G9a_GST_peak_5071	chr4	118518230	118518321	+	117	NA	intron (NR_125757, intron 2 of 3)	MER57B1|LTR|ERV1	168721	NR_125757	103689918	Hs.582062	NR_125757		LINC01378	-	long intergenic non-protein coding RNA 1378	ncRNA
siCtrl_G9a_GST_peak_5358	chr5	112553501	112553567	+	117	NA	intron (NM_001085377, intron 3 of 18)	intron (NM_001085377, intron 3 of 18)	77101	NM_002387	4163	Hs.593171	NM_002387	ENSG00000171444	MCC	MCC1	MCC regulator of WNT signaling pathway	protein-coding
siCtrl_G9a_GST_peak_1511	chr11	111667598	111667821	+	117	NA	intron (NM_001352421, intron 14 of 15)	intron (NM_001352421, intron 14 of 15)	-30596	NM_001177562	5519	Hs.269128	NM_002716	ENSG00000137713	PPP2R1B	PP2A-Abeta|PR65B	protein phosphatase 2 scaffold subunit Abeta	protein-coding
siCtrl_G9a_GST_peak_9	chr1	579413	579588	+	117	NA	Intergenic	MLT1I|LTR|ERVL-MaLR	-11435	NR_162149	113219467		NR_162149		MIR12136	-	microRNA 12136	ncRNA
siCtrl_G9a_GST_peak_4748	chr3	111745118	111745342	+	117	NA	Intergenic	LTR40c|LTR|ERVL	-13235	NM_001042575	344805	Hs.435490	NM_001042575	ENSG00000176040	TMPRSS7	-	transmembrane serine protease 7	protein-coding
siCtrl_G9a_GST_peak_5587	chr6	17868303	17868379	+	117	NA	intron (NM_001105567, intron 4 of 36)	intron (NM_001105567, intron 4 of 36)	119525	NM_001105568	63971	Hs.94499	NM_022113	ENSG00000137177	KIF13A	RBKIN|bA500C11.2	kinesin family member 13A	protein-coding
siCtrl_G9a_GST_peak_4734	chr3	102097227	102097293	+	117	NA	Intergenic	Intergenic	-56599	NM_001329788	131368	Hs.352213	NM_175056	ENSG00000170044	ZPLD1	-	zona pellucida like domain containing 1	protein-coding
siCtrl_G9a_GST_peak_2366	chr14	66317484	66317874	+	117	NA	Intergenic	Intergenic	379859	NR_030355	693210		NR_030355	ENSG00000207781	MIR625	MIRN625|hsa-mir-625	microRNA 625	ncRNA
siCtrl_G9a_GST_peak_612	chr1	162947735	162948042	+	117	NA	Intergenic	Intergenic	-90508	NM_001102445	5999	Hs.386726	NM_005613	ENSG00000117152	RGS4	RGP4|SCZD9	regulator of G protein signaling 4	protein-coding
siCtrl_G9a_GST_peak_5700	chr6	56120611	56120707	+	117	NA	intron (NM_001318752, intron 1 of 28)	intron (NM_001318752, intron 1 of 28)	-8281	NR_134849	81578	Hs.47629	NM_030820	ENSG00000124749	COL21A1	COLA1L|FP633	collagen type XXI alpha 1 chain	protein-coding
siCtrl_G9a_GST_peak_1917	chr12	92270826	92270885	+	117	NA	Intergenic	Intergenic	264634	NR_046159	256021	Hs.651357	NM_001256373	ENSG00000257242	LINC01619	C12orf79	long intergenic non-protein coding RNA 1619	ncRNA
siCtrl_G9a_GST_peak_3509	chr2	17181623	17182076	+	117	NA	Intergenic	Intergenic	-334747	NM_030797	81553	Hs.467769	NM_030797	ENSG00000197872	FAM49A	-	family with sequence similarity 49 member A	protein-coding
siCtrl_G9a_GST_peak_4227	chr20	8651559	8651850	+	117	NA	intron (NM_182734, intron 9 of 32)	intron (NM_182734, intron 9 of 32)	-160128	NR_004386	26767		NR_004386	ENSG00000201348	RNU105B	105B|E1-2	RNA, U105B small nucleolar	snoRNA
siCtrl_G9a_GST_peak_4555	chr3	5933595	5933752	+	117	NA	Intergenic	MLT1G3|LTR|ERVL-MaLR	-641733	NR_039953	100616334		NR_039953	ENSG00000265180	MIR4790	-	microRNA 4790	ncRNA
siCtrl_G9a_GST_peak_2231	chr13	74784997	74785328	+	117	NA	Intergenic	Intergenic	-20419	NR_144451	100507612	Hs.447508	NR_144451	ENSG00000235532	LINC00402	-	long intergenic non-protein coding RNA 402	ncRNA
siCtrl_G9a_GST_peak_3759	chr2	64417579	64417714	+	117	NA	intron (NR_033837, intron 4 of 5)	intron (NR_033837, intron 4 of 5)	14973	NR_033837	150992	Hs.272318	NR_033837	ENSG00000230923	LINC00309	NCRNA00309	long intergenic non-protein coding RNA 309	ncRNA
siCtrl_G9a_GST_peak_3312	chr18	39737949	39738151	+	117	NA	Intergenic	Intergenic	-28583	NR_046454	284260	Hs.652819	NR_046174	ENSG00000267586	LINC00907	-	long intergenic non-protein coding RNA 907	ncRNA
siCtrl_G9a_GST_peak_465	chr1	117680907	117681102	+	117	NA	Intergenic	Intergenic	-16633	NM_025188	80263	Hs.301526	NM_025188	ENSG00000134253	TRIM45	RNF99	tripartite motif containing 45	protein-coding
siCtrl_G9a_GST_peak_2334	chr14	51915731	51916600	+	117	NA	Intergenic	Intergenic	-39681	NM_001042481	122786	Hs.434914	NM_152330	ENSG00000139926	FRMD6	C14orf31|EX1|Willin|c14_5320	FERM domain containing 6	protein-coding
siCtrl_G9a_GST_peak_3862	chr2	87557813	87557886	+	117	NA	Intergenic	Intergenic	135940	NR_039928	100616370		NR_039928	ENSG00000264793	MIR4771-1	-	microRNA 4771-1	ncRNA
siCtrl_G9a_GST_peak_5495	chr5	169230807	169231021	+	117	NA	intron (NR_156756, intron 26 of 52)	intron (NR_156756, intron 26 of 52)	166635	NR_156756	1794	Hs.586174	NM_004946	ENSG00000134516	DOCK2	IMD40	dedicator of cytokinesis 2	protein-coding
siCtrl_G9a_GST_peak_5049	chr4	91707856	91708258	+	117	NA	intron (NM_001145065, intron 7 of 10)	MER21A|LTR|ERVL	551875	NM_207491	401145	Hs.654735	NM_207491	ENSG00000184305	CCSER1	FAM190A	coiled-coil serine rich protein 1	protein-coding
siCtrl_G9a_GST_peak_2530	chr15	49582428	49582755	+	117	NA	intron (NR_147895, intron 7 of 10)	intron (NR_147895, intron 7 of 10)	120147	NR_147895	2585	Hs.122006	NM_002044	ENSG00000156958	GALK2	GK2	galactokinase 2	protein-coding
siCtrl_G9a_GST_peak_941	chr1	221785982	221786056	+	117	NA	Intergenic	Intergenic	124223	NR_111939	11221	Hs.497822	NM_007207	ENSG00000143507	DUSP10	MKP-5|MKP5	dual specificity phosphatase 10	protein-coding
siCtrl_G9a_GST_peak_2859	chr16	54636608	54636687	+	117	NA	Intergenic	Intergenic	-232036	NR_134923	100996345	Hs.112680	NR_134922	ENSG00000261803	LINC02140	-	long intergenic non-protein coding RNA 2140	ncRNA
siCtrl_G9a_GST_peak_2710	chr15	89711472	89711880	+	117	NA	intron (NM_007011, intron 9 of 14)	intron (NM_007011, intron 9 of 14)	53134	NM_000326	6017	Hs.1933	NM_000326	ENSG00000140522	RLBP1	CRALBP	retinaldehyde binding protein 1	protein-coding
siCtrl_G9a_GST_peak_4040	chr2	176753946	176754115	+	117	NA	Intergenic	Intergenic	112965	NM_030650	80856	Hs.209561	NM_030650	ENSG00000144320	LNPK	KIAA1715|LNP|LNP1|NEDEHCC|Ul|ulnaless	lunapark, ER junction formation factor	protein-coding
siCtrl_G9a_GST_peak_6968	chr9	68468964	68469167	+	117	NA	Intergenic	L1MA6|LINE|L1	-13697	NR_033907	642236	Hs.650100	NR_033907		FRG1JP	-	FSHD region gene 1 family member J, pseudogene	pseudo
siCtrl_G9a_GST_peak_6205	chr7	33830405	33830557	+	117	NA	Intergenic	Intergenic	-114046	NM_133468	168667	Hs.660998	NM_133468	ENSG00000164619	BMPER	CRIM3|CV-2|CV2	BMP binding endothelial regulator	protein-coding
siCtrl_G9a_GST_peak_1140	chr10	48859422	48859892	+	117	NA	intron (NR_033172, intron 2 of 5).2	intron (NR_033172, intron 2 of 5).2	3031	NR_033172	728798	Hs.664786	NM_001042515		FRMPD2B	FRMPD2|FRMPD2L1|FRMPD2L2|FRMPD2P1|FRMPD2P2|FRMPDP2|PDZD5A|PDZD5B|PDZD5C|PDZK4|PDZK5A|PDZK5B|PDZK5C|bA556L1.2|yX59F3.2	FERM and PDZ domain containing 2B, pseudogene	pseudo
siCtrl_G9a_GST_peak_2095	chr12	128113972	128114153	+	117	NA	Intergenic	Intergenic	6950	NR_120451	101927637	Hs.170413	NR_120451	ENSG00000256022	LINC02411	-	long intergenic non-protein coding RNA 2411	ncRNA
siCtrl_G9a_GST_peak_2290	chr13	104947788	104948158	+	117	NA	Intergenic	Intergenic	870423	NR_126374	104326190	Hs.334381	NR_126374	ENSG00000234551	LINC01309	TCONS_l2_00007459	long intergenic non-protein coding RNA 1309	ncRNA
siCtrl_G9a_GST_peak_4628	chr3	38721457	38721528	+	117	NA	Intergenic	MamGyp-int|LTR|Gypsy	-30314	NM_001354701	6331	Hs.517898	NM_000335	ENSG00000183873	SCN5A	CDCD2|CMD1E|CMPD2|HB1|HB2|HBBD|HH1|ICCD|IVF|LQT3|Nav1.5|PFHB1|SSS1|VF1	sodium voltage-gated channel alpha subunit 5	protein-coding
siCtrl_G9a_GST_peak_6129	chr7	18827723	18827841	+	117	NA	intron (NM_001321897, intron 16 of 25)	intron (NM_001321897, intron 16 of 25)	278889	NM_001204147	9734	Hs.196054	NM_014707	ENSG00000048052	HDAC9	HD7|HD7b|HD9|HDAC|HDAC7|HDAC7B|HDAC9B|HDAC9FL|HDRP|MITR	histone deacetylase 9	protein-coding
siCtrl_G9a_GST_peak_1173	chr10	69892670	69893024	+	117	NA	intron (NM_032578, intron 2 of 19)	AluSx1|SINE|Alu	23602	NR_045663	84665	Hs.55205	NM_032578	ENSG00000138347	MYPN	CMD1DD|CMH22|MYOP|NEM11|RCM4	myopalladin	protein-coding
siCtrl_G9a_GST_peak_1621	chr12	19079222	19079468	+	117	NA	Intergenic	Intergenic	188292	NM_033328	93661	Hs.131288	NM_033328	ENSG00000177938	CAPZA3	CAPPA3|Gsg3|HEL-S-86	capping actin protein of muscle Z-line subunit alpha 3	protein-coding
siCtrl_G9a_GST_peak_2441	chr15	30510116	30510403	+	117	NA	Intergenic	MLT1F2|LTR|ERVL-MaLR	22020	NR_026771	26082	Hs.652128	NR_026771	ENSG00000225930	LINC02249	DKFZP434L187	long intergenic non-protein coding RNA 2249	ncRNA
siCtrl_G9a_GST_peak_1137	chr10	46672523	46672975	+	117	NA	intron (NR_033172, intron 2 of 5)	intron (NR_033172, intron 2 of 5)	3039	NR_033172	728798	Hs.664786	NM_001042515		FRMPD2B	FRMPD2|FRMPD2L1|FRMPD2L2|FRMPD2P1|FRMPD2P2|FRMPDP2|PDZD5A|PDZD5B|PDZD5C|PDZK4|PDZK5A|PDZK5B|PDZK5C|bA556L1.2|yX59F3.2	FERM and PDZ domain containing 2B, pseudogene	pseudo
siCtrl_G9a_GST_peak_6754	chr8	93624377	93624620	+	117	NA	intron (NR_125827, intron 3 of 4)	intron (NR_125827, intron 3 of 4)	43224	NR_125827	102724710	Hs.125714	NR_125827	ENSG00000253634	LOC102724710	-	uncharacterized LOC102724710	ncRNA
siCtrl_G9a_GST_peak_2371	chr14	71322367	71322426	+	117	NA	Intergenic	MER41A|LTR|ERV1	-46166	NM_033141	4293	Hs.445496	NM_033141	ENSG00000006432	MAP3K9	MEKK9|MLK1|PRKE1	mitogen-activated protein kinase kinase kinase 9	protein-coding
siCtrl_G9a_GST_peak_5784	chr6	91844855	91844980	+	117	NA	Intergenic	Intergenic	-386461	NR_039786	100616174		NR_039786	ENSG00000263734	MIR4643	-	microRNA 4643	ncRNA
siCtrl_G9a_GST_peak_5028	chr4	79792095	79792156	+	117	NA	exon (NM_017593, exon 11 of 14)	exon (NM_017593, exon 11 of 14)	68467	NM_001040202	152559	Hs.657312	NM_177453	ENSG00000163291	PAQR3	RKTG	progestin and adipoQ receptor family member 3	protein-coding
siCtrl_G9a_GST_peak_5673	chr6	49874415	49874526	+	117	NA	Intergenic	Intergenic	-29661	NM_001205220	167	Hs.109620	NM_001131	ENSG00000124812	CRISP1	AEGL1|ARP|CRISP-1|HEL-S-57|HSCRISP1D|HSCRISP1G|HUMARP	cysteine rich secretory protein 1	protein-coding
siCtrl_G9a_GST_peak_4602	chr3	25027288	25027352	+	117	NA	intron (NM_001290216, intron 2 of 10)	intron (NM_001290216, intron 2 of 10)	156506	NM_001290216	5915	Hs.543218	NM_000965	ENSG00000077092	RARB	HAP|MCOPS12|NR1B2|RARbeta1|RRB2	retinoic acid receptor beta	protein-coding
siCtrl_G9a_GST_peak_6740	chr8	91697919	91697986	+	117	NA	Intergenic	LTR5_Hs|LTR|ERVK	-39641	NM_001008495	169200	Hs.567759	NM_001008495	ENSG00000180694	TMEM64	-	transmembrane protein 64	protein-coding
siCtrl_G9a_GST_peak_473	chr1	118326347	118326918	+	117	NA	Intergenic	Intergenic	145612	NM_017686	54834	Hs.310809	NM_017686	ENSG00000196505	GDAP2	MACROD3|SCAR27	ganglioside induced differentiation associated protein 2	protein-coding
siCtrl_G9a_GST_peak_7114	chr9	119946514	119946849	+	117	NA	intron (NM_001365068, intron 3 of 22)	intron (NM_001365068, intron 3 of 22)	-3201	NR_003708	100124538	Hs.693445	NR_003708	ENSG00000207268	SNORA70C	U70C	small nucleolar RNA, H/ACA box 70C	snoRNA
siCtrl_G9a_GST_peak_1265	chr10	112477447	112477627	+	117	NA	intron (NM_001134363, intron 1 of 13)	MLT1K|LTR|ERVL-MaLR	73443	NM_001134363	282996	Hs.116630	NM_001134363	ENSG00000203867	RBM20	-	RNA binding motif protein 20	protein-coding
siCtrl_G9a_GST_peak_5388	chr5	124828912	124828971	+	117	NA	promoter-TSS (NR_109887)	promoter-TSS (NR_109887)	-13	NR_109887	101927460	Hs.407582	NR_109887	ENSG00000260192	LINC02240	-	long intergenic non-protein coding RNA 2240	ncRNA
siCtrl_G9a_GST_peak_2714	chr15	91693895	91694432	+	117	NA	intron (NM_001323040, intron 2 of 12)	intron (NM_001323040, intron 2 of 12)	49137	NM_001323040	9899	Hs.21754	NM_014848	ENSG00000185518	SV2B	HsT19680	synaptic vesicle glycoprotein 2B	protein-coding
siCtrl_G9a_GST_peak_5917	chr6	122329706	122329894	+	117	NA	Intergenic	Intergenic	-390896	NM_001135564	3298	Hs.158195	NM_004506	ENSG00000025156	HSF2	HSF 2|HSTF 2	heat shock transcription factor 2	protein-coding
siCtrl_G9a_GST_peak_1881	chr12	76235382	76236035	+	117	NA	Intergenic	L2a|LINE|L2	189848	NM_007350	22822	Hs.602085	NM_007350	ENSG00000139289	PHLDA1	DT1P1B11|PHRIP|TDAG51	pleckstrin homology like domain family A member 1	protein-coding
siCtrl_G9a_GST_peak_2245	chr13	78072402	78072475	+	117	NA	Intergenic	MIR|SINE|MIR	-37371	NM_001160706	8796	Hs.534699	NM_003843	ENSG00000136155	SCEL	-	sciellin	protein-coding
siCtrl_G9a_GST_peak_1251	chr10	99804250	99804310	+	117	NA	Intergenic	HAL1-2a_MD|LINE|L1	-13695	NM_001206528	55118	Hs.500736	NM_018058	ENSG00000095713	CRTAC1	ASPIC|ASPIC1|CEP-68|CEP68|LOTUS	cartilage acidic protein 1	protein-coding
siCtrl_G9a_GST_peak_398	chr1	108563043	108563104	+	117	NA	Intergenic	HERVL-int|LTR|ERVL	-55271	NM_006113	10451	Hs.267659	NM_006113	ENSG00000134215	VAV3	-	vav guanine nucleotide exchange factor 3	protein-coding
siCtrl_G9a_GST_peak_779	chr1	208825807	208825917	+	117	NA	Intergenic	Intergenic	-76171	NR_146914	105372893	Hs.568720	NR_146914	ENSG00000232812	LINC01717	-	long intergenic non-protein coding RNA 1717	ncRNA
siCtrl_G9a_GST_peak_4144	chr2	215925979	215926072	+	117	NA	intron (NR_103740, intron 3 of 54)	intron (NR_103740, intron 3 of 54)	-29215	NM_015657	26154	Hs.134585	NM_015657	ENSG00000144452	ABCA12	ARCI4A|ARCI4B|ICR2B|LI2	ATP binding cassette subfamily A member 12	protein-coding
siCtrl_G9a_GST_peak_1891	chr12	79325460	79325646	+	117	NA	intron (NM_001135805, intron 2 of 11)	intron (NM_001135805, intron 2 of 11)	66999	NM_005639	6857	Hs.310545	NM_005639	ENSG00000067715	SYT1	BAGOS|P65|SVP65|SYT	synaptotagmin 1	protein-coding
siCtrl_G9a_GST_peak_7176	chrX	54787350	54787409	+	117	NA	intron (NM_198510, intron 6 of 12)	L1PA5|LINE|L1	37309	NM_198510	347365	Hs.454272	NM_198510	ENSG00000102313	ITIH6	ITIH5L|UNQ6369|dJ14O9.1	inter-alpha-trypsin inhibitor heavy chain family member 6	protein-coding
siCtrl_G9a_GST_peak_4677	chr3	65164390	65164519	+	117	NA	Intergenic	MLT1F2|LTR|ERVL-MaLR	-490778	NM_001318781	56999	Hs.656071	NM_182920	ENSG00000163638	ADAMTS9	-	ADAM metallopeptidase with thrombospondin type 1 motif 9	protein-coding
siCtrl_G9a_GST_peak_1530	chr11	115908790	115908950	+	117	NA	Intergenic	Intergenic	-277952	NR_034148	283143	Hs.130499	NR_034148		LINC00900	-	long intergenic non-protein coding RNA 900	ncRNA
siCtrl_G9a_GST_peak_6812	chr8	123740190	123740341	+	117	NA	Intergenic	Intergenic	-33920	NR_126348	104266958	Hs.575540	NR_126348	ENSG00000253819	LINC01151	-	long intergenic non-protein coding RNA 1151	ncRNA
siCtrl_G9a_GST_peak_2392	chr14	86121593	86121739	+	117	NA	TTS (NM_013231)	TTS (NM_013231)	121973	NM_001346143	23768	Hs.533710	NM_013231	ENSG00000185070	FLRT2	-	fibronectin leucine rich transmembrane protein 2	protein-coding
siCtrl_G9a_GST_peak_5933	chr6	131151407	131151598	+	117	NA	intron (NM_001195597, intron 1 of 1)	intron (NM_001195597, intron 1 of 1)	2957	NM_001195597	100507203	Hs.388715	NM_001195597	ENSG00000256162	SMLR1	-	small leucine rich protein 1	protein-coding
siCtrl_G9a_GST_peak_5000	chr4	53862441	53862637	+	117	NA	intron (NM_152540, intron 5 of 8)	intron (NM_152540, intron 5 of 8)	134055	NM_023940	65997	Hs.8035	NM_023940	ENSG00000128045	RASL11B	-	RAS like family 11 member B	protein-coding
siCtrl_G9a_GST_peak_1670	chr12	29863160	29863219	+	117	NA	intron (NM_001367875, intron 5 of 19)	intron (NM_001367875, intron 5 of 19)	73686	NM_001193451	83857	Hs.401954	NM_031920	ENSG00000133687	TMTC1	ARG99|OLF|TMTC1A	transmembrane O-mannosyltransferase targeting cadherins 1	protein-coding
siCtrl_G9a_GST_peak_1727	chr12	43608085	43608530	+	117	NA	Intergenic	Intergenic	59189	NR_146866	105369740	Hs.577746	NR_146866	ENSG00000258331	LINC02461	-	long intergenic non-protein coding RNA 2461	ncRNA
siCtrl_G9a_GST_peak_2293	chr13	109954026	109954550	+	117	NA	Intergenic	Intergenic	-98755	NR_126361	104326054	Hs.569298	NR_126361	ENSG00000229792	LINC00399	TCONS_00021596	long intergenic non-protein coding RNA 399	ncRNA
siCtrl_G9a_GST_peak_2879	chr16	64912851	64913275	+	117	NA	Intergenic	Intergenic	242903	NM_001330576	1009	Hs.116471	NM_001797	ENSG00000140937	CDH11	CAD11|CDHOB|ESWS|OB|OSF-4	cadherin 11	protein-coding
siCtrl_G9a_GST_peak_5451	chr5	158726858	158727088	+	117	NA	Intergenic	MamGypLTR1c|LTR|Gypsy	30508	NM_002187	3593	Hs.674	NM_002187	ENSG00000113302	IL12B	CLMF|CLMF2|IL-12B|IMD28|IMD29|NKSF|NKSF2	interleukin 12B	protein-coding
siCtrl_G9a_GST_peak_2322	chr14	36027927	36028153	+	117	NA	intron (NM_001283043, intron 39 of 41)	intron (NM_001283043, intron 39 of 41)	24670	NM_032594	84684	Hs.62813	NM_032594	ENSG00000168348	INSM2	IA-6|IA6|mlt1	INSM transcriptional repressor 2	protein-coding
siCtrl_G9a_GST_peak_2292	chr13	109440637	109440792	+	117	NA	intron (NM_015011, intron 5 of 34)	intron (NM_015011, intron 5 of 34)	158755	NM_001198950	23026	Hs.656587	NM_015011	ENSG00000041515	MYO16	MYAP3|MYR8|Myo16b|NYAP3|PPP1R107	myosin XVI	protein-coding
siCtrl_G9a_GST_peak_3502	chr2	12402203	12402412	+	117	NA	intron (NR_110196, intron 3 of 5)	MSTB1|LTR|ERVL-MaLR	63051	NR_037452	100500884		NR_037452	ENSG00000264089	MIR3681	-	microRNA 3681	ncRNA
siCtrl_G9a_GST_peak_3915	chr2	107577537	107577634	+	117	NA	Intergenic	Intergenic	-74020	NM_001142352	84620	Hs.98265	NM_032528	ENSG00000144057	ST6GAL2	SIAT2|ST6GalII	ST6 beta-galactoside alpha-2,6-sialyltransferase 2	protein-coding
siCtrl_G9a_GST_peak_6865	chr8	140807836	140808261	+	117	NA	intron (NM_001160372, intron 21 of 22)	intron (NM_001160372, intron 21 of 22)	-92682	NR_104210	51305	Hs.493037	NM_001282534	ENSG00000169427	KCNK9	K2p9.1|KT3.2|TASK-3|TASK3	potassium two pore domain channel subfamily K member 9	protein-coding
siCtrl_G9a_GST_peak_1269	chr10	115110164	115110276	+	117	NA	Intergenic	Intergenic	-200370	NM_001177660	3026	Hs.422542	NM_004132	ENSG00000148702	HABP2	FSAP|HABP|HGFAL|NMTC5|PHBP	hyaluronan binding protein 2	protein-coding
siCtrl_G9a_GST_peak_3486	chr2	6933040	6933125	+	117	NA	Intergenic	Intergenic	-22640	NR_038369	400941	Hs.446195	NM_001001695	ENSG00000205837	LINC00487	-	long intergenic non-protein coding RNA 487	ncRNA
siCtrl_G9a_GST_peak_2654	chr15	81115053	81115167	+	117	NA	intron (NM_018689, intron 1 of 28)	intron (NM_018689, intron 1 of 28)	19304	NR_030393	693132		NR_030393	ENSG00000208003	MIR549A	MIR549|MIRN549|hsa-mir-549|hsa-mir-549a|mir-549a	microRNA 549a	ncRNA
siCtrl_G9a_GST_peak_3492	chr2	7806797	7806932	+	117	NA	Intergenic	Intergenic	232922	NR_110256	101929551	Hs.116006	NR_110256	ENSG00000226506	LOC101929551	-	uncharacterized LOC101929551	ncRNA
siCtrl_G9a_GST_peak_6059	chr6	161817671	161817980	+	117	NA	intron (NM_013987, intron 8 of 10)	intron (NM_013987, intron 8 of 10)	-74184	NR_134593	105378098	Hs.691066	NR_134593		LOC105378098	-	uncharacterized LOC105378098	ncRNA
siCtrl_G9a_GST_peak_7129	chr9	123694411	123694798	+	117	NA	Intergenic	Intergenic	-3153	NM_001190945	7185	Hs.531251	NM_005658	ENSG00000056558	TRAF1	EBI6|MGC:10353	TNF receptor associated factor 1	protein-coding
siCtrl_G9a_GST_peak_2783	chr16	6696228	6696298	+	117	NA	intron (NM_018723, intron 2 of 15)	intron (NM_018723, intron 2 of 15)	-127547	NM_001142334	54715	Hs.459842	NM_018723	ENSG00000078328	RBFOX1	2BP1|A2BP1|FOX-1|FOX1|HRNBP1	RNA binding fox-1 homolog 1	protein-coding
siCtrl_G9a_GST_peak_622	chr1	164743959	164744290	+	117	NA	promoter-TSS (NR_038072)	promoter-TSS (NR_038072)	-246	NR_038072	100505795	Hs.661039	NR_038072	ENSG00000233693	LOC100505795	-	uncharacterized LOC100505795	ncRNA
siCtrl_G9a_GST_peak_1231	chr10	89824422	89824832	+	117	NA	Intergenic	Intergenic	201245	NM_001304718	5728	Hs.500466	NM_000314	ENSG00000171862	PTEN	10q23del|BZS|CWS1|DEC|GLM2|MHAM|MMAC1|PTEN1|PTENbeta|TEP1	phosphatase and tensin homolog	protein-coding
siCtrl_G9a_GST_peak_799	chr1	209476002	209476065	+	117	NA	Intergenic	Intergenic	-22768	NR_135085	105372897	Hs.116154	NR_135085	ENSG00000227940	LINC01696	-	long intergenic non-protein coding RNA 1696	ncRNA
siCtrl_G9a_GST_peak_4117	chr2	207998043	207998185	+	117	NA	intron (NM_001270943, intron 1 of 3)	intron (NM_001270943, intron 1 of 3)	747	NM_001270944	8609	Hs.59908	NM_003709	ENSG00000118263	KLF7	UKLF	Kruppel like factor 7	protein-coding
siCtrl_G9a_GST_peak_2058	chr12	119894571	119894659	+	117	NA	intron (NM_178499, intron 2 of 13)	MER41A|LTR|ERV1	122081	NM_178499	160777	Hs.98188	NM_178499	ENSG00000183273	CCDC60	-	coiled-coil domain containing 60	protein-coding
siCtrl_G9a_GST_peak_3275	chr18	1014668	1014859	+	117	NA	Intergenic	Intergenic	-86769	NR_146724	388456	Hs.407666	NR_146724	ENSG00000259837	LINC01904	-	long intergenic non-protein coding RNA 1904	ncRNA
siCtrl_G9a_GST_peak_4319	chr20	38199823	38200136	+	117	NA	Intergenic	LTR3A|LTR|ERVK	-346588	NR_027124	339568	Hs.434319	NR_027124	ENSG00000230324	LINC01734	-	long intergenic non-protein coding RNA 1734	ncRNA
siCtrl_G9a_GST_peak_2332	chr14	51915338	51915422	+	117	NA	Intergenic	Intergenic	-40466	NM_001042481	122786	Hs.434914	NM_152330	ENSG00000139926	FRMD6	C14orf31|EX1|Willin|c14_5320	FERM domain containing 6	protein-coding
siCtrl_G9a_GST_peak_285	chr1	88661816	88662054	+	117	NA	Intergenic	Intergenic	-487892	NM_001320707	5586	Hs.440833	NM_006256	ENSG00000065243	PKN2	PAK2|PRK2|PRKCL2|PRO2042|Pak-2|STK7	protein kinase N2	protein-coding
siCtrl_G9a_GST_peak_1402	chr11	35057606	35057703	+	117	NA	Intergenic	Intergenic	94270	NR_039836	100616437		NR_039836	ENSG00000251862	MIR1343	-	microRNA 1343	ncRNA
siCtrl_G9a_GST_peak_6738	chr8	89909187	89909249	+	117	NA	Intergenic	L1MA1|LINE|L1	-569506	NM_005941	4325	Hs.492187	NM_005941	ENSG00000156103	MMP16	C8orf57|MMP-X2|MT-MMP2|MT-MMP3|MT3-MMP	matrix metallopeptidase 16	protein-coding
siCtrl_G9a_GST_peak_6628	chr8	37331674	37331991	+	117	NA	intron (NR_121620, intron 2 of 6)	intron (NR_121620, intron 2 of 6)	19599	NR_121620	100507420	Hs.105962	NR_121620		LINC01605	LincDUSP	long intergenic non-protein coding RNA 1605	ncRNA
siCtrl_G9a_GST_peak_3352	chr18	53962611	53962673	+	117	NA	Intergenic	Intergenic	-104149	NR_148972	642484		NR_148972	ENSG00000206129	LOC642484	-	uncharacterized LOC642484	ncRNA
siCtrl_G9a_GST_peak_2849	chr16	51910943	51911480	+	117	NA	Intergenic	Intergenic	114781	NR_110916	101927364	Hs.133120	NR_110916	ENSG00000260057	LINC01571	-	long intergenic non-protein coding RNA 1571	ncRNA
siCtrl_G9a_GST_peak_3481	chr2	6864335	6864467	+	117	NA	Intergenic	Intergenic	46041	NR_038369	400941	Hs.446195	NM_001001695	ENSG00000205837	LINC00487	-	long intergenic non-protein coding RNA 487	ncRNA
siCtrl_G9a_GST_peak_4052	chr2	182497761	182497996	+	117	NA	intron (NM_001160277, intron 1 of 12)	intron (NM_001160277, intron 1 of 12)	23954	NM_201548	375298	Hs.732358	NM_201548	ENSG00000188452	CERKL	RP26	ceramide kinase like	protein-coding
siCtrl_G9a_GST_peak_5302	chr5	73198990	73199435	+	117	NA	intron (NM_001244364, intron 23 of 27)	L2a|LINE|L2	89841	NM_001244364	64283	Hs.482521	NM_001080479	ENSG00000214944	ARHGEF28	RGNEF|RIP2|p190RHOGEF	Rho guanine nucleotide exchange factor 28	protein-coding
siCtrl_G9a_GST_peak_6571	chr8	15194943	15195178	+	117	NA	Intergenic	MLT1B|LTR|ERVL-MaLR	-99120	NM_001322880	137868	Hs.545526	NM_139167	ENSG00000185053	SGCZ	ZSG1	sarcoglycan zeta	protein-coding
siCtrl_G9a_GST_peak_7036	chr9	85999237	85999296	+	117	NA	intron (NM_174938, intron 2 of 13)	intron (NM_174938, intron 2 of 13)	-52390	NM_001244961	257019	Hs.127535	NM_174938	ENSG00000172159	FRMD3	4.1O|EPB41L4O|EPB41LO|P410	FERM domain containing 3	protein-coding
siCtrl_G9a_GST_peak_6621	chr8	37010805	37010880	+	117	NA	intron (NR_031672, intron 1 of 2).2	intron (NR_031672, intron 1 of 2).2	31371	NR_031672	100302233		NR_031672	ENSG00000221641	MIR1268A	MIR1268|MIRN1268|hsa-mir-1268|hsa-mir-1268a	microRNA 1268a	ncRNA
siCtrl_G9a_GST_peak_2136	chr13	27990074	27990373	+	117	NA	Intergenic	Intergenic	-8533	NM_002097	2971	Hs.445977	NM_002097	ENSG00000122034	GTF3A	AP2|TFIIIA	general transcription factor IIIA	protein-coding
siCtrl_G9a_GST_peak_1097	chr10	24408914	24408977	+	117	NA	intron (NM_001098500, intron 2 of 18)	intron (NM_001098500, intron 2 of 18)	-88775	NM_001282767	56243	Hs.445885	NM_019590	ENSG00000120549	KIAA1217	ETL4|SKT	KIAA1217	protein-coding
siCtrl_G9a_GST_peak_4801	chr3	132987827	132988004	+	117	NA	intron (NM_001282865, intron 2 of 3)	intron (NM_001282865, intron 2 of 3)	-11950	NR_110812	101927455	Hs.570550	NR_110812	ENSG00000251011	TMEM108-AS1	-	TMEM108 antisense RNA 1	ncRNA
siCtrl_G9a_GST_peak_7153	chrX	1566567	1567513	+	117	NA	intron (NM_001173473, intron 1 of 12).2	intron (NM_001173473, intron 1 of 12).2	4762	NM_001173474	8623	Hs.533514	NM_004192	ENSG00000169093	ASMTL	ASMTLX|ASMTLY|ASTML	acetylserotonin O-methyltransferase like	protein-coding
siCtrl_G9a_GST_peak_550	chr1	143228673	143228838	+	117	NA	Intergenic	AluJb|SINE|Alu	-26516	NR_110761	102723769	Hs.652926	NR_110761		LOC102723769	-	uncharacterized LOC102723769	ncRNA
siCtrl_G9a_GST_peak_1501	chr11	96585653	96585865	+	117	NA	Intergenic	THE1B|LTR|ERVL-MaLR	344170	NR_135097	105369443	Hs.599377	NR_135097	ENSG00000256684	LINC02737	-	long intergenic non-protein coding RNA 2737	ncRNA
siCtrl_G9a_GST_peak_5702	chr6	56229210	56229423	+	117	NA	intron (NM_001318752, intron 1 of 28)	intron (NM_001318752, intron 1 of 28)	29610	NM_001318752	81578	Hs.47629	NM_030820	ENSG00000124749	COL21A1	COLA1L|FP633	collagen type XXI alpha 1 chain	protein-coding
siCtrl_G9a_GST_peak_2886	chr16	75942776	75942842	+	117	NA	Intergenic	LTR16B1|LTR|ERVL	-182421	NM_001355613	105371346		NM_001355613	ENSG00000283755	CPHXL	-	cytoplasmic polyadenylated homeobox like	protein-coding
siCtrl_G9a_GST_peak_6616	chr8	36429584	36429768	+	117	NA	Intergenic	Intergenic	-212216	NM_001031836	157855	Hs.13861	NM_001031836	ENSG00000215262	KCNU1	KCNMC1|KCa5|KCa5.1|Kcnma3|Slo3	potassium calcium-activated channel subfamily U member 1	protein-coding
siCtrl_G9a_GST_peak_935	chr1	221448320	221448661	+	117	NA	Intergenic	MLT1B|LTR|ERVL-MaLR	61148	NR_024236	400804	Hs.722626	NR_024236	ENSG00000234754	C1orf140	-	uncharacterized LOC400804	ncRNA
siCtrl_G9a_GST_peak_7115	chr9	119946948	119947009	+	117	NA	intron (NM_001365068, intron 3 of 22)	intron (NM_001365068, intron 3 of 22)	-3498	NR_003708	100124538	Hs.693445	NR_003708	ENSG00000207268	SNORA70C	U70C	small nucleolar RNA, H/ACA box 70C	snoRNA
siCtrl_G9a_GST_peak_5305	chr5	73389211	73389276	+	117	NA	Intergenic	Intergenic	214907	NR_105009	102503429	Hs.519391	NR_105009	ENSG00000248942	LINC01335	-	long intergenic non-protein coding RNA 1335	ncRNA
siCtrl_G9a_GST_peak_4163	chr2	220926946	220927005	+	117	NA	Intergenic	MER20|DNA|hAT-Charlie	-155689	NR_036228	100422959		NR_036228	ENSG00000266518	MIR4268	-	microRNA 4268	ncRNA
siCtrl_G9a_GST_peak_5374	chr5	122774927	122775022	+	117	NA	Intergenic	Intergenic	-15688	NM_001166226	153241	Hs.483209	NM_153223	ENSG00000168944	CEP120	CCDC100|JBTS31|SRTD13	centrosomal protein 120	protein-coding
siCtrl_G9a_GST_peak_7062	chr9	98619731	98619791	+	117	NA	intron (NR_023390, intron 1 of 2)	intron (NR_023390, intron 1 of 2)	-18212	NM_020207	375748	Hs.432364	NM_020207	ENSG00000182150	ERCC6L2	BMFS2|C9orf102|RAD26L|SR278	ERCC excision repair 6 like 2	protein-coding
siCtrl_G9a_GST_peak_6849	chr8	138423562	138423621	+	117	NA	intron (NR_125428, intron 1 of 2)	HERVH-int|LTR|ERV1	2240	NR_125428	101927915	Hs.695851	NR_125428		LOC101927915	-	uncharacterized LOC101927915	ncRNA
siCtrl_G9a_GST_peak_4998	chr4	53791880	53791962	+	117	NA	intron (NM_152540, intron 5 of 8)	intron (NM_152540, intron 5 of 8)	63437	NM_023940	65997	Hs.8035	NM_023940	ENSG00000128045	RASL11B	-	RAS like family 11 member B	protein-coding
siCtrl_G9a_GST_peak_5259	chr5	58519025	58519177	+	117	NA	intron (NM_001349243, intron 4 of 16)	intron (NM_001349243, intron 4 of 16)	52840	NM_001197220	5144	Hs.117545	NM_006203	ENSG00000113448	PDE4D	ACRDYS2|DPDE3|HSPDE4D|PDE43|PDE4DN2|STRK1	phosphodiesterase 4D	protein-coding
siCtrl_G9a_GST_peak_1204	chr10	80284200	80284564	+	117	NA	Intergenic	Intergenic	257283	NR_073447	414243	Hs.55047	NR_073447	ENSG00000230417	LINC00595	C10orf101	long intergenic non-protein coding RNA 595	ncRNA
siCtrl_G9a_GST_peak_7085	chr9	108618767	108619070	+	117	NA	Intergenic	Intergenic	162096	NM_018112	55151	Hs.411925	NM_018112	ENSG00000095209	TMEM38B	C9orf87|D4Ertd89e|OI14|TRIC-B|TRICB|bA219P18.1	transmembrane protein 38B	protein-coding
siCtrl_G9a_GST_peak_6756	chr8	93639801	93639883	+	117	NA	intron (NR_125827, intron 3 of 4)	intron (NR_125827, intron 3 of 4)	27880	NR_125827	102724710	Hs.125714	NR_125827	ENSG00000253634	LOC102724710	-	uncharacterized LOC102724710	ncRNA
siCtrl_G9a_GST_peak_6907	chr9	17323412	17323552	+	117	NA	intron (NM_001365029, intron 8 of 25)	intron (NM_001365029, intron 8 of 25)	188444	NM_001286984	54875	Hs.435381	NM_017738	ENSG00000044459	CNTLN	C9orf101|C9orf39|bA340N12.1	centlein	protein-coding
siCtrl_G9a_GST_peak_2517	chr15	48294530	48294640	+	117	NA	Intergenic	Intergenic	-118602	NM_205850	283652	Hs.710240	NM_205850	ENSG00000188467	SLC24A5	JSX|NCKX5|OCA6|SHEP4	solute carrier family 24 member 5	protein-coding
siCtrl_G9a_GST_peak_1086	chr10	16277017	16277407	+	117	NA	Intergenic	ERV3-16A3_I-int|LTR|ERVL	-201730	NM_001261836	9317	Hs.444321	NM_030664	ENSG00000165983	PTER	HPHRP|RPR-1	phosphotriesterase related	protein-coding
siCtrl_G9a_GST_peak_6791	chr8	108209417	108209541	+	117	NA	Intergenic	MLT2B2|LTR|ERVL	139264	NM_001314051	284	Hs.369675	NM_001146	ENSG00000154188	ANGPT1	AGP1|AGPT|ANG1	angiopoietin 1	protein-coding
siCtrl_G9a_GST_peak_6796	chr8	110731553	110731670	+	117	NA	Intergenic	MLT1J|LTR|ERVL-MaLR	-27591	NM_001099744	55638	Hs.390738	NM_017786	ENSG00000147642	SYBU	GOLSYN|OCSYN|SNPHL	syntabulin	protein-coding
siCtrl_G9a_GST_peak_2826	chr16	27931398	27931533	+	117	NA	intron (NM_001109763, intron 2 of 6)	intron (NM_001109763, intron 2 of 6)	-31987	NM_144675	146395	Hs.91910	NM_144675	ENSG00000169181	GSG1L	PRO19651	GSG1 like	protein-coding
siCtrl_G9a_GST_peak_5178	chr5	8642375	8642448	+	117	NA	Intergenic	Intergenic	181373	NR_039663	100616142		NR_039663	ENSG00000284000	MIR4458	mir-4458	microRNA 4458	ncRNA
siCtrl_G9a_GST_peak_4840	chr3	158997952	158998272	+	117	NA	intron (NM_001197108, intron 1 of 6)	intron (NM_001197108, intron 1 of 6)	-2323	NR_037483	100500803		NR_037483	ENSG00000263634	MIR3919	-	microRNA 3919	ncRNA
siCtrl_G9a_GST_peak_5026	chr4	79550628	79551038	+	117	NA	Intergenic	LTR9|LTR|ERV1	-16315	NR_038303	100505702	Hs.235795	NR_038303		LINC01094	-	long intergenic non-protein coding RNA 1094	ncRNA
siCtrl_G9a_GST_peak_4993	chr4	53116474	53116737	+	117	NA	Intergenic	Intergenic	199135	NM_145263	132671	Hs.527090	NM_145263	ENSG00000163071	SPATA18	Mieap|SPETEX1	spermatogenesis associated 18	protein-coding
siCtrl_G9a_GST_peak_1946	chr12	97694995	97695189	+	117	NA	Intergenic	Intergenic	-161462	NR_152618	196475	Hs.652568	NR_024037	ENSG00000255794	RMST	LINC00054|NCRMS|NCRNA00054	rhabdomyosarcoma 2 associated transcript	ncRNA
siCtrl_G9a_GST_peak_3738	chr2	59529150	59529216	+	117	NA	Intergenic	Intergenic	84340	NR_110219	101927285	Hs.570209	NR_110219	ENSG00000222030	LINC01793	-	long intergenic non-protein coding RNA 1793	ncRNA
siCtrl_G9a_GST_peak_2163	chr13	38665168	38665622	+	117	NA	intron (NR_047500, intron 2 of 5)	LTR9|LTR|ERV1	51974	NR_047500	100874188	Hs.569249	NR_047500	ENSG00000223685	LINC00571	-	long intergenic non-protein coding RNA 571	ncRNA
siCtrl_G9a_GST_peak_596	chr1	158975377	158975800	+	117	NA	intron (NM_001364867, intron 1 of 12)	intron (NM_001364867, intron 1 of 12)	-4109	NM_001206567	3428	Hs.380250	NM_005531	ENSG00000163565	IFI16	IFNGIP1|PYHIN2	interferon gamma inducible protein 16	protein-coding
siCtrl_G9a_GST_peak_3482	chr2	6864614	6864761	+	117	NA	Intergenic	Intergenic	45755	NR_038369	400941	Hs.446195	NM_001001695	ENSG00000205837	LINC00487	-	long intergenic non-protein coding RNA 487	ncRNA
siCtrl_G9a_GST_peak_3410	chr19	29368759	29369313	+	117	NA	Intergenic	Intergenic	-87002	NR_027318	148145	Hs.112651	NR_027318	ENSG00000267339	LINC00906	-	long intergenic non-protein coding RNA 906	ncRNA
siCtrl_G9a_GST_peak_6215	chr7	35793897	35794130	+	117	NA	TTS (NR_120512)	TTS (NR_120512)	37966	NR_108083	100506725	Hs.304253	NR_108082	ENSG00000227544	LOC100506725	-	uncharacterized LOC100506725	ncRNA
siCtrl_G9a_GST_peak_2258	chr13	90651292	90651563	+	117	NA	Intergenic	Intergenic	120544	NR_047489	100874187	Hs.564526	NR_047489	ENSG00000261446	LINC00559	-	long intergenic non-protein coding RNA 559	ncRNA
siCtrl_G9a_GST_peak_4605	chr3	25419804	25419875	+	117	NA	intron (NM_001290300, intron 1 of 7)	intron (NM_001290300, intron 1 of 7)	6579	NR_134933	105376997	Hs.536687	NR_134933		RARB-AS1	-	RARB antisense RNA 1	ncRNA
siCtrl_G9a_GST_peak_7100	chr9	112686054	112686399	+	117	NA	intron (NM_007203, intron 4 of 10)	intron (NM_007203, intron 4 of 10)	-124652	NM_001198656	445815	Hs.591908	NM_007203	ENSG00000157654	PALM2-AKAP2	AKAP-2|AKAP-KL|AKAP2|AKAPKL|MISP2|PALM2|PRKA2	PALM2-AKAP2 fusion	protein-coding
siCtrl_G9a_GST_peak_4149	chr2	217206662	217206727	+	117	NA	intron (NM_020814, intron 1 of 3)	MER102c|DNA|hAT-Charlie	30512	NM_020814	57574	Hs.170388	NM_020814	ENSG00000144583	2022-03-04	MARCH-IV|RNF174	membrane associated ring-CH-type finger 4	protein-coding
siCtrl_G9a_GST_peak_4576	chr3	15546852	15546911	+	117	NA	intron (NM_005677, intron 1 of 16)	intron (NM_005677, intron 1 of 16)	-6502	NM_080538	8292	Hs.146735	NM_005677	ENSG00000206561	COLQ	CMS5|EAD	collagen like tail subunit of asymmetric acetylcholinesterase	protein-coding
siCtrl_G9a_GST_peak_4019	chr2	167976544	167976716	+	117	NA	intron (NM_152381, intron 2 of 10)	intron (NM_152381, intron 2 of 10)	20835	NR_046665	100874011		NR_046665		XIRP2-AS1	-	XIRP2 antisense RNA 1	ncRNA
siCtrl_G9a_GST_peak_6804	chr8	122029339	122029442	+	117	NA	Intergenic	Intergenic	-205104	NM_021021	6641	Hs.46701	NM_021021	ENSG00000172164	SNTB1	59-DAP|A1B|BSYN2|DAPA1B|SNT2|SNT2B1|TIP-43	syntrophin beta 1	protein-coding
siCtrl_G9a_GST_peak_4379	chr20	53465716	53465880	+	117	NA	Intergenic	LTR16E1|LTR|ERVL	373666	NM_177959	55816	Hs.473133	NM_018431	ENSG00000101134	DOK5	C20orf180|IRS-6|IRS6	docking protein 5	protein-coding
siCtrl_G9a_GST_peak_4141	chr2	211728936	211729116	+	117	NA	Intergenic	MLT1D|LTR|ERVL-MaLR	246731	NR_002763	29034	Hs.658398	NR_002763	ENSG00000280837	CPS1-IT1	CPS1-IT|CPS1IT|CPS1IT1|PRO0132	CPS1 intronic transcript 1	ncRNA
siCtrl_G9a_GST_peak_1974	chr12	102799807	102800125	+	117	NA	intron (NM_000618, intron 3 of 3)	intron (NM_000618, intron 3 of 3)	72362	NM_001111284	3479	Hs.160562	NM_000618	ENSG00000017427	IGF1	IGF|IGF-I|IGFI|MGF	insulin like growth factor 1	protein-coding
siCtrl_G9a_GST_peak_296	chr1	90658604	90658766	+	117	NA	Intergenic	Intergenic	198016	NM_001320185	284695	Hs.306221	NM_181781	ENSG00000162664	ZNF326	ZAN75|ZIRD|Zfp326|dJ871E2.1	zinc finger protein 326	protein-coding
siCtrl_G9a_GST_peak_1379	chr11	19981245	19981614	+	117	NA	intron (NM_001244963, intron 11 of 39)	intron (NM_001244963, intron 11 of 39)	-62673	NM_001111019	89797	Hs.64341	NM_145117	ENSG00000166833	NAV2	HELAD1|POMFIL2|RAINB1|STEERIN2|UNC53H2	neuron navigator 2	protein-coding
siCtrl_G9a_GST_peak_3438	chr19	57599239	57599298	+	117	NA	Intergenic	GA-rich|Low_complexity|Low_complexity	-32241	NM_020903	57663	Hs.515632	NM_020903	ENSG00000131864	USP29	HOM-TES-84/86	ubiquitin specific peptidase 29	protein-coding
siCtrl_G9a_GST_peak_4687	chr3	69016840	69017188	+	117	NA	Intergenic	Intergenic	-35253	NM_001005527	151647	Hs.187873	NM_182522	ENSG00000163377	TAFA4	FAM19A4|TAFA-4	TAFA chemokine like family member 4	protein-coding
siCtrl_G9a_GST_peak_5334	chr5	103509101	103509177	+	117	NA	Intergenic	MLT2B3|LTR|ERVL	-610649	NM_001300741	83594	Hs.434289	NM_031438	ENSG00000112874	NUDT12	-	nudix hydrolase 12	protein-coding
siCtrl_G9a_GST_peak_3475	chr2	6776256	6776399	+	117	NA	Intergenic	Intergenic	-1489	NR_110498	102800315	Hs.729713	NR_110498	ENSG00000236172	LINC01246	-	long intergenic non-protein coding RNA 1246	ncRNA
siCtrl_G9a_GST_peak_4392	chr21	9466470	9466544	+	117	NA	Intergenic	LTR49|LTR|ERV1	-359325	NR_037421	100500862		NR_037421	ENSG00000275708	MIR3648-1	MIR3648|hsa-mir-3648-1	microRNA 3648-1	ncRNA
siCtrl_G9a_GST_peak_2094	chr12	128113649	128113849	+	117	NA	Intergenic	Intergenic	7263	NR_120451	101927637	Hs.170413	NR_120451	ENSG00000256022	LINC02411	-	long intergenic non-protein coding RNA 2411	ncRNA
siCtrl_G9a_GST_peak_5053	chr4	96284192	96284297	+	117	NA	intron (NM_003728, intron 1 of 15)	intron (NM_003728, intron 1 of 15)	185880	NM_003728	8633	Hs.388565	NM_003728	ENSG00000182168	UNC5C	UNC5H3	unc-5 netrin receptor C	protein-coding
siCtrl_G9a_GST_peak_1952	chr12	97699632	97699749	+	117	NA	Intergenic	Intergenic	-156864	NR_152618	196475	Hs.652568	NR_024037	ENSG00000255794	RMST	LINC00054|NCRMS|NCRNA00054	rhabdomyosarcoma 2 associated transcript	ncRNA
siCtrl_G9a_GST_peak_193	chr1	65066974	65067118	+	117	NA	intron (NM_020925, intron 3 of 26)	intron (NM_020925, intron 3 of 26)	21516	NR_039957	100616338		NR_039957	ENSG00000264470	MIR4794	-	microRNA 4794	ncRNA
siCtrl_G9a_GST_peak_4108	chr2	206525549	206525805	+	117	NA	Intergenic	Intergenic	-21547	NM_201264	8828	Hs.471200	NM_003872	ENSG00000118257	NRP2	NP2|NPN2|PRO2714|VEGF165R2	neuropilin 2	protein-coding
siCtrl_G9a_GST_peak_4475	chr22	18673891	18673974	+	117	NA	intron (NR_136570, intron 5 of 11)	intron (NR_136570, intron 5 of 11)	-5685	NR_136574	105379550	Hs.729779	NR_136574		LOC105379550	-	uncharacterized LOC105379550	ncRNA
siCtrl_G9a_GST_peak_3974	chr2	137290875	137290973	+	117	NA	Intergenic	Intergenic	-232191	NM_001316349	80731	Hs.68533	NM_001080427	ENSG00000144229	THSD7B	-	thrombospondin type 1 domain containing 7B	protein-coding
siCtrl_G9a_GST_peak_4225	chr20	8268025	8268208	+	117	NA	intron (NM_182734, intron 2 of 32)	intron (NM_182734, intron 2 of 32)	38765	NR_046809	100874337	Hs.662218	NR_046809	ENSG00000225479	PLCB1-IT1	-	PLCB1 intronic transcript 1	ncRNA
siCtrl_G9a_GST_peak_6384	chr7	95865718	95865810	+	117	NA	intron (NM_001160210, intron 3 of 17)	L2c|LINE|L2	-16696	NR_030322	693176		NR_030322	ENSG00000208025	MIR591	MIRN591|hsa-mir-591	microRNA 591	ncRNA
siCtrl_G9a_GST_peak_5121	chr4	169567471	169567647	+	117	NA	intron (NM_001166109, intron 1 of 18)	intron (NM_001166109, intron 1 of 18)	14830	NM_001166109	23022	Hs.151220	NM_016081	ENSG00000129116	PALLD	CGI-151|CGI151|MYN|PNCA1|SIH002	palladin, cytoskeletal associated protein	protein-coding
siCtrl_G9a_GST_peak_2689	chr15	87398885	87399201	+	117	NA	intron (NM_152336, intron 23 of 24)	intron (NM_152336, intron 23 of 24)	-77068	NR_135682	105370954	Hs.668501	NR_135682	ENSG00000259636	LOC105370954	-	uncharacterized LOC105370954	ncRNA
siCtrl_G9a_GST_peak_3999	chr2	157640757	157640834	+	117	NA	Intergenic	Intergenic	347904	NM_000408	2820	Hs.512382	NM_000408	ENSG00000115159	GPD2	GDH2|GPDM|mGPDH	glycerol-3-phosphate dehydrogenase 2	protein-coding
siCtrl_G9a_GST_peak_1994	chr12	106135153	106135488	+	117	NA	intron (NR_110110, intron 2 of 2)	intron (NR_110110, intron 2 of 2)	34768	NR_110111	101929110	Hs.145944	NR_110108	ENSG00000257859	CASC18	-	cancer susceptibility 18	ncRNA
siCtrl_G9a_GST_peak_192	chr1	65006028	65006221	+	117	NA	intron (NM_001293274, intron 1 of 25)	intron (NM_001293274, intron 1 of 25)	34527	NM_001293274	57685	Hs.443891	NM_020925	ENSG00000158966	CACHD1	-	cache domain containing 1	protein-coding
siCtrl_G9a_GST_peak_4074	chr2	200850476	200850708	+	117	NA	Intergenic	LTR50|LTR|ERVL	-30378	NR_109905	129450	Hs.204619	NM_152382	ENSG00000162971	TYW5	C2orf60|hTYW5	tRNA-yW synthesizing protein 5	protein-coding
siCtrl_G9a_GST_peak_2749	chr15	95019548	95019667	+	117	NA	intron (NM_018349, intron 20 of 21)	intron (NM_018349, intron 20 of 21)	120448	NM_001159644	55784	Hs.33368	NM_018349	ENSG00000140563	MCTP2	-	multiple C2 and transmembrane domain containing 2	protein-coding
siCtrl_G9a_GST_peak_4004	chr2	158896366	158896569	+	117	NA	intron (NM_001135098, intron 2 of 8)	intron (NM_001135098, intron 2 of 8)	44776	NM_001135098	151531	Hs.128427	NM_173355	ENSG00000007001	UPP2	UDRPASE2|UP2|UPASE2	uridine phosphorylase 2	protein-coding
siCtrl_G9a_GST_peak_1937	chr12	95165972	95166089	+	117	NA	Intergenic	Intergenic	-62144	NR_030171	574449		NR_030171	ENSG00000283998	MIR492	MIRN492|hsa-mir-492	microRNA 492	ncRNA
siCtrl_G9a_GST_peak_6920	chr9	23779364	23779423	+	117	NA	intron (NM_001351462, intron 2 of 8)	intron (NM_001351462, intron 2 of 8)	41914	NM_001351471	1993	Hs.166109	NM_004432	ENSG00000107105	ELAVL2	HEL-N1|HELN1|HUB	ELAV like RNA binding protein 2	protein-coding
siCtrl_G9a_GST_peak_6405	chr7	107893730	107894201	+	117	NA	intron (NM_001371144, intron 3 of 31)	intron (NM_001371144, intron 3 of 31)	-10136	NM_001371181
siCtrl_G9a_GST_peak_4155	chr2	217642514	217642739	+	117	NA	Intergenic	Intergenic	82161	NM_003284	7141	Hs.3017	NM_003284	ENSG00000118245	TNP1	TP1	transition protein 1	protein-coding
siCtrl_G9a_GST_peak_6175	chr7	29359795	29360013	+	117	NA	intron (NM_001293070, intron 2 of 13)	intron (NM_001293070, intron 2 of 13)	-111318	NR_120522	102724484	Hs.638665	NR_120522		LOC102724484	-	uncharacterized LOC102724484	ncRNA
siCtrl_G9a_GST_peak_6643	chr8	41256005	41256138	+	117	NA	Intergenic	Intergenic	-28103	NR_145746	109616980		NR_145746	ENSG00000238936	SNORD65B	-	small nucleolar RNA, C/D box 65B	snoRNA
siCtrl_G9a_GST_peak_5993	chr6	145460719	145460799	+	117	NA	Intergenic	Intergenic	547254	NM_001368132	7957	Hs.486696	NM_005670	ENSG00000112425	EPM2A	EPM2|MELF	EPM2A glucan phosphatase, laforin	protein-coding
siCtrl_G9a_GST_peak_2454	chr15	32518789	32518963	+	117	NA	Intergenic	ERVL-B4-int|LTR|ERVL	176617	NM_001282493	653125		NM_001282493	ENSG00000249931	GOLGA8K	-	golgin A8 family member K	protein-coding
siCtrl_G9a_GST_peak_6237	chr7	37109732	37109953	+	117	NA	intron (NM_001206482, intron 15 of 21)	intron (NM_001206482, intron 15 of 21)	72441	NR_104120	100861514	Hs.627775	NR_104120	ENSG00000224101	ELMO1-AS1	-	ELMO1 antisense RNA 1	ncRNA
siCtrl_G9a_GST_peak_5760	chr6	86901999	86902100	+	117	NA	Intergenic	MSTB1|LTR|ERVL-MaLR	-513598	NR_003038	387066	Hs.292457	NR_003038	ENSG00000203875	SNHG5	C6orf160|LINC00044|NCRNA00044|U50HG	small nucleolar RNA host gene 5	ncRNA
siCtrl_G9a_GST_peak_4758	chr3	115770612	115770675	+	117	NA	intron (NM_002338, intron 2 of 6)	intron (NM_002338, intron 2 of 6)	-146670	NR_145779	109623450		NR_145779		SNORD155	-	small nucleolar RNA, C/D box 155	snoRNA
siCtrl_G9a_GST_peak_302	chr1	91593814	91593886	+	117	NA	Intergenic	Intergenic	-106038	NM_032186	84146	Hs.173001	NM_016620	ENSG00000122482	ZNF644	BM-005|MYP21|NatF|ZEP-2	zinc finger protein 644	protein-coding
siCtrl_G9a_GST_peak_1213	chr10	84385597	84386128	+	117	NA	intron (NR_163253, intron 3 of 10)	intron (NR_163253, intron 3 of 10)	-393186	NR_120666	101929590	Hs.733268	NR_120666	ENSG00000225738	NRG3-AS1	C10orf100|Em:AC010157.1	NRG3 antisense RNA 1	ncRNA
siCtrl_G9a_GST_peak_1405	chr11	36040806	36040974	+	117	NA	intron (NM_001304264, intron 1 of 5)	intron (NM_001304264, intron 1 of 5)	9242	NR_039769	100616311		NR_039769	ENSG00000263389	MIR3973	-	microRNA 3973	ncRNA
siCtrl_G9a_GST_peak_3734	chr2	56703789	56704001	+	117	NA	Intergenic	MER50|LTR|ERV1	-290990	NR_125368	100129434	Hs.580330	NR_125368		LOC100129434	-	uncharacterized LOC100129434	ncRNA
siCtrl_G9a_GST_peak_1407	chr11	36170048	36170821	+	117	NA	intron (NM_174902, intron 4 of 5)	intron (NM_174902, intron 4 of 5)	-70983	NR_135064	101928510	Hs.675857	NR_135064		LOC101928510	-	uncharacterized LOC101928510	ncRNA
siCtrl_G9a_GST_peak_6803	chr8	121838238	121838325	+	117	NA	Intergenic	Intergenic	-13995	NM_021021	6641	Hs.46701	NM_021021	ENSG00000172164	SNTB1	59-DAP|A1B|BSYN2|DAPA1B|SNT2|SNT2B1|TIP-43	syntrophin beta 1	protein-coding
siCtrl_G9a_GST_peak_5333	chr5	103204039	103204239	+	117	NA	Intergenic	Intergenic	-305649	NM_001300741	83594	Hs.434289	NM_031438	ENSG00000112874	NUDT12	-	nudix hydrolase 12	protein-coding
siCtrl_G9a_GST_peak_1177	chr10	73073306	73073427	+	117	NA	Intergenic	Intergenic	-5644	NM_001363518	55315	Hs.438419	NM_018344	ENSG00000198246	SLC29A3	ENT3|HCLAP|HJCD|PHID	solute carrier family 29 member 3	protein-coding
siCtrl_G9a_GST_peak_3843	chr2	79598389	79598611	+	117	NA	Intergenic	Intergenic	129470	NR_110289	101927987	Hs.574704	NR_110289	ENSG00000229385	LOC101927987	-	uncharacterized LOC101927987	ncRNA
siCtrl_G9a_GST_peak_1262	chr10	108326911	108326985	+	117	NA	Intergenic	Intergenic	427025	NR_134330	105378470	Hs.142910	NR_134329	ENSG00000229775	LINC02624	-	long intergenic non-protein coding RNA 2624	ncRNA
siCtrl_G9a_GST_peak_1363	chr11	15695105	15695387	+	117	NA	intron (NM_001293172, intron 1 of 2)	intron (NM_001293172, intron 1 of 2)	29815	NM_001293172	102724957	Hs.512245	NM_001293172		LOC102724957	-	uncharacterized LOC102724957	protein-coding
siCtrl_G9a_GST_peak_2350	chr14	56889585	56889644	+	117	NA	Intergenic	Intergenic	-91435	NR_135241	101927690	Hs.385477	NR_135241	ENSG00000258803	LOC101927690	-	uncharacterized LOC101927690	ncRNA
siCtrl_G9a_GST_peak_2169	chr13	42699031	42699227	+	117	NA	intron (NM_152910, intron 1 of 28)	intron (NM_152910, intron 1 of 28)	-13049	NR_123714	160851	Hs.630380	NM_152910	ENSG00000102780	DGKH	DGKeta	diacylglycerol kinase eta	protein-coding
siCtrl_G9a_GST_peak_1156	chr10	60614644	60614859	+	117	NA	Intergenic	Intergenic	139976	NR_027508	728640	Hs.729209	NR_027508		FAM133CP	-	family with sequence similarity 133, member A pseudogene	pseudo
siCtrl_G9a_GST_peak_774	chr1	208445799	208445998	+	117	NA	Intergenic	Intergenic	-28169	NM_025179	5362	Hs.497626	NM_025179	ENSG00000076356	PLXNA2	OCT|PLXN2	plexin A2	protein-coding
siCtrl_G9a_GST_peak_4681	chr3	66840101	66840298	+	117	NA	Intergenic	Intergenic	-51439	NR_135533	105377143	Hs.553944	NR_135533		LOC105377143	-	uncharacterized LOC105377143	ncRNA
siCtrl_G9a_GST_peak_1512	chr11	111667946	111668200	+	117	NA	intron (NM_001352421, intron 14 of 15)	MLT1G3|LTR|ERVL-MaLR	-30960	NM_001177562	5519	Hs.269128	NM_002716	ENSG00000137713	PPP2R1B	PP2A-Abeta|PR65B	protein phosphatase 2 scaffold subunit Abeta	protein-coding
siCtrl_G9a_GST_peak_1543	chr11	121005602	121005663	+	117	NA	intron (NM_005422, intron 9 of 22)	intron (NM_005422, intron 9 of 22)	32257	NM_005422	7007	Hs.248162	NM_005422	ENSG00000109927	TECTA	DFNA12|DFNA8|DFNB21	tectorin alpha	protein-coding
siCtrl_G9a_GST_peak_2252	chr13	81328053	81328138	+	117	NA	Intergenic	Intergenic	-264431	NR_125770	103724386	Hs.539622	NR_125770		LINC00377	TCONS_00021861	long intergenic non-protein coding RNA 377	ncRNA
siCtrl_G9a_GST_peak_4296	chr20	29581239	29581418	+	117	NA	Intergenic	Intergenic	-10965	NR_133643	105379478	Hs.98121	NR_133643		FAM242B	-	family with sequence similarity 242 member B	ncRNA
siCtrl_G9a_GST_peak_6067	chr6	163119185	163119309	+	117	NA	intron (NM_013987, intron 1 of 10)	MLT1J|LTR|ERVL-MaLR	-28917	NM_152410	135138	Hs.25791	NM_152410	ENSG00000112530	PACRG	GLUP|HAK005771|PACRG2.1|PARK2CRG	parkin coregulated	protein-coding
siCtrl_G9a_GST_peak_1960	chr12	98502846	98503057	+	117	NA	Intergenic	MIR|SINE|MIR	-113725	NR_036189	100422924		NR_036189	ENSG00000263890	MIR4303	-	microRNA 4303	ncRNA
siCtrl_G9a_GST_peak_2264	chr13	94150313	94150702	+	117	NA	intron (NM_005708, intron 1 of 8)	intron (NM_005708, intron 1 of 8)	271447	NM_005708	10082	Hs.444329	NM_005708	ENSG00000183098	GPC6	OMIMD1	glypican 6	protein-coding
siCtrl_G9a_GST_peak_5350	chr5	111055558	111055880	+	117	NA	intron (NR_040093, intron 2 of 6)	7SK|RNA|RNA	36229	NM_001142483	9315	Hs.36053	NM_004772	ENSG00000134986	NREP	C5orf13|D4S114|P311|PRO1873|PTZ17|SEZ17	neuronal regeneration related protein	protein-coding
siCtrl_G9a_GST_peak_104	chr1	57492743	57492825	+	117	NA	intron (NM_001353986, intron 9 of 14)	intron (NM_001353986, intron 9 of 14)	-60971	NM_001278543	732	Hs.391835	NM_000066	ENSG00000021852	C8B	C82	complement C8 beta chain	protein-coding
siCtrl_G9a_GST_peak_867	chr1	215416870	215417000	+	117	NA	Intergenic	LTR16A1|LTR|ERVL	160855	NM_001017425	3776	Hs.497745	NM_014217	ENSG00000082482	KCNK2	K2p2.1|TPKC1|TREK|TREK-1|TREK1|hTREK-1c|hTREK-1e	potassium two pore domain channel subfamily K member 2	protein-coding
siCtrl_G9a_GST_peak_5077	chr4	120567649	120568234	+	117	NA	Intergenic	MLT1H1|LTR|ERVL-MaLR	-17982	NM_001083	8654	Hs.647971	NM_001083	ENSG00000138735	PDE5A	CGB-PDE|CN5A|PDE5	phosphodiesterase 5A	protein-coding
siCtrl_G9a_GST_peak_5493	chr5	169230103	169230281	+	117	NA	exon (NM_004946, exon 26 of 52)	exon (NM_004946, exon 26 of 52)	165913	NR_156756	1794	Hs.586174	NM_004946	ENSG00000134516	DOCK2	IMD40	dedicator of cytokinesis 2	protein-coding
siCtrl_G9a_GST_peak_4697	chr3	72710577	72710668	+	117	NA	Intergenic	Intergenic	2778	NR_135531	105377162	Hs.123457	NR_135531		LOC105377162	-	uncharacterized LOC105377162	ncRNA
siCtrl_G9a_GST_peak_1498	chr11	87780373	87780438	+	117	NA	Intergenic	HERVH-int|LTR|ERV1	128206	NM_022337	23682	Hs.591975	NM_022337	ENSG00000123892	RAB38	NY-MEL-1|rrGTPbp	RAB38, member RAS oncogene family	protein-coding
siCtrl_G9a_GST_peak_434	chr1	116339645	116339721	+	117	NA	Intergenic	Intergenic	-28257	NM_001232	845	Hs.57975	NM_001232	ENSG00000118729	CASQ2	PDIB2	calsequestrin 2	protein-coding
siCtrl_G9a_GST_peak_1092	chr10	20255684	20255914	+	117	NA	intron (NM_032812, intron 1 of 13)	intron (NM_032812, intron 1 of 13)	150438	NM_032812	84898	Hs.99472	NM_032812	ENSG00000120594	PLXDC2	TEM7R	plexin domain containing 2	protein-coding
siCtrl_G9a_GST_peak_4417	chr21	19890230	19890295	+	117	NA	Intergenic	Intergenic	-114160	NM_002772	5651	Hs.149473	NM_002772	ENSG00000154646	TMPRSS15	ENTK|PRSS7	transmembrane serine protease 15	protein-coding
siCtrl_G9a_GST_peak_6400	chr7	106239351	106239711	+	117	NA	Intergenic	Intergenic	62073	NM_175884	168455	Hs.29692	NM_175884	ENSG00000253276	CCDC71L	C7orf74	coiled-coil domain containing 71 like	protein-coding
siCtrl_G9a_GST_peak_7157	chrX	3360763	3360836	+	117	NA	Intergenic	Intergenic	89493	NR_145722	109616969		NR_145722	ENSG00000212214	SNORA48B	-	small nucleolar RNA, H/ACA box 48B	snoRNA
siCtrl_G9a_GST_peak_5800	chr6	99594522	99594638	+	117	NA	Intergenic	Intergenic	22095	NR_039672	100616347		NR_039672	ENSG00000265226	MIR548AI	-	microRNA 548ai	ncRNA
siCtrl_G9a_GST_peak_6633	chr8	37417839	37417960	+	117	NA	Intergenic	Intergenic	-38995	NR_121621	100507420	Hs.105962	NR_121620		LINC01605	LincDUSP	long intergenic non-protein coding RNA 1605	ncRNA
siCtrl_G9a_GST_peak_5021	chr4	76032941	76033097	+	117	NA	Intergenic	Intergenic	-23101	NR_149051	105377283	Hs.103159	NR_149051		LINC02562	-	long intergenic non-protein coding RNA 2562	ncRNA
siCtrl_G9a_GST_peak_4794	chr3	131941831	131942006	+	117	NA	Intergenic	LTR16C|LTR|ERVL	-94333	NM_001134194	55	Hs.433060	NM_001099	ENSG00000014257	ACPP	5'-NT|ACP-3|ACP3	acid phosphatase, prostate	protein-coding
siCtrl_G9a_GST_peak_6992	chr9	71107682	71108005	+	117	NA	intron (NM_021965, intron 9 of 10)	intron (NM_021965, intron 9 of 10)	47940	NM_153237	169693	Hs.663056	NM_153237	ENSG00000181778	TMEM252	C9orf71	transmembrane protein 252	protein-coding
siCtrl_G9a_GST_peak_1357	chr11	12472773	12472857	+	117	NA	intron (NM_018222, intron 1 of 12)	intron (NM_018222, intron 1 of 12)	73697	NM_018222	55742	Hs.432914	NM_018222	ENSG00000197702	PARVA	CH-ILKBP|MXRA2	parvin alpha	protein-coding
siCtrl_G9a_GST_peak_4906	chr4	23724542	23724601	+	117	NA	Intergenic	LTR7|LTR|ERV1	158344	NM_001330753	10891	Hs.527078	NM_013261	ENSG00000109819	PPARGC1A	LEM6|PGC-1(alpha)|PGC-1alpha|PGC-1v|PGC1|PGC1A|PPARGC1	PPARG coactivator 1 alpha	protein-coding
siCtrl_G9a_GST_peak_6139	chr7	25296216	25296356	+	117	NA	Intergenic	Intergenic	-28181	NM_022150	64111	Hs.60473	NM_022150	ENSG00000105954	NPVF	C7orf9|RFRP	neuropeptide VF precursor	protein-coding
siCtrl_G9a_GST_peak_5095	chr4	141056722	141056943	+	117	NA	intron (NR_147610, intron 3 of 4)	intron (NR_147610, intron 3 of 4)	7663	NR_147610	101927516	Hs.662570	NR_147610		LOC101927516	-	uncharacterized LOC101927516	ncRNA
siCtrl_G9a_GST_peak_3446	chr2	1366014	1366076	+	117	NA	intron (NM_018968, intron 16 of 16)	intron (NM_018968, intron 16 of 16)	-51188	NM_000547	7173	Hs.467554	NM_000547	ENSG00000115705	TPO	MSA|TDH2A|TPX	thyroid peroxidase	protein-coding
siCtrl_G9a_GST_peak_4661	chr3	59761722	59761929	+	117	NA	intron (NM_001354589, intron 7 of 8)	intron (NM_001354589, intron 7 of 8)	-117602	NR_149028	339902	Hs.132446	NR_149028		LOC339902	-	hCG1813818	ncRNA
siCtrl_G9a_GST_peak_6771	chr8	96906849	96907244	+	117	NA	Intergenic	MLT2F|LTR|ERVL	53530	NR_036611	100500773	Hs.741582	NR_036611		LOC100500773	-	serine and arginine rich splicing factor 3 pseudogene	pseudo
siCtrl_G9a_GST_peak_1826	chr12	68151107	68151174	+	117	NA	Intergenic	Intergenic	-27885	NR_110063	101927901	Hs.369609	NR_110063	ENSG00000255970	LINC02421	-	long intergenic non-protein coding RNA 2421	ncRNA
siCtrl_G9a_GST_peak_4995	chr4	53127482	53127541	+	117	NA	Intergenic	Intergenic	210041	NM_145263	132671	Hs.527090	NM_145263	ENSG00000163071	SPATA18	Mieap|SPETEX1	spermatogenesis associated 18	protein-coding
siCtrl_G9a_GST_peak_6888	chr9	9102328	9102620	+	117	NA	intron (NM_002839, intron 10 of 45)	intron (NM_002839, intron 10 of 45)	244456	NR_121600	101929407	Hs.649971	NR_121599		PTPRD-AS1	-	PTPRD antisense RNA 1	ncRNA
siCtrl_G9a_GST_peak_4742	chr3	108160115	108160210	+	117	NA	intron (NM_014981, intron 23 of 41)	intron (NM_014981, intron 23 of 41)	88007	NM_014981	22989	Hs.731060	NM_014981	ENSG00000144821	MYH15	-	myosin heavy chain 15	protein-coding
siCtrl_G9a_GST_peak_5015	chr4	65096619	65096684	+	117	NA	Intergenic	LTR25-int|LTR|ERV1	178517	NM_001010874	253017	Hs.227752	NM_001010874	ENSG00000205678	TECRL	CPVT3|GPSN2L|SRD5A2L2|TERL	trans-2,3-enoyl-CoA reductase like	protein-coding
siCtrl_G9a_GST_peak_2280	chr13	101851767	101851826	+	117	NA	intron (NM_001350748, intron 13 of 44)	L1PA5|LINE|L1	217063	NM_001350750	259232	Hs.525146	NM_052867	ENSG00000102452	NALCN	CLIFAHDD|CanIon|IHPRF|IHPRF1|INNFD|VGCNL1|bA430M15.1	sodium leak channel, non-selective	protein-coding
siCtrl_G9a_GST_peak_4136	chr2	209663607	209663670	+	117	NA	intron (NR_136588, intron 3 of 5)	intron (NR_136588, intron 3 of 5)	256271	NR_136588	101927960	Hs.159960	NR_136588		LOC101927960	-	uncharacterized LOC101927960	ncRNA
siCtrl_G9a_GST_peak_546	chr1	142799672	142799806	+	117	NA	Intergenic	Intergenic	-86134	NR_046228	100874392	Hs.648245	NR_046228		ANKRD20A12P	-	ankyrin repeat domain 20 family member A12, pseudogene	pseudo
siCtrl_G9a_GST_peak_6423	chr7	120884704	120884785	+	117	NA	intron (NM_024913, intron 18 of 22)	intron (NM_024913, intron 18 of 22)	-80677	NM_016087	51384	Hs.272375	NM_016087	ENSG00000002745	WNT16	-	Wnt family member 16	protein-coding
siCtrl_G9a_GST_peak_2757	chr15	99721516	99721640	+	116	NA	intron (NM_001288616, intron 7 of 11)	L3|LINE|CR1	68208	NM_001288615	64927	Hs.513195	NM_022905	ENSG00000103852	TTC23	HCC-8	tetratricopeptide repeat domain 23	protein-coding
siCtrl_G9a_GST_peak_1619	chr12	17963293	17963403	+	116	NA	Intergenic	LTR57-int|LTR|ERVL	137115	NR_039770	100616279		NR_039770	ENSG00000283665	MIR3974	-	microRNA 3974	ncRNA
siCtrl_G9a_GST_peak_6446	chr7	131640549	131641066	+	116	NA	Intergenic	Intergenic	45828	NR_110836	101928782	Hs.571369	NR_110836	ENSG00000224865	LOC101928782	-	uncharacterized LOC101928782	ncRNA
siCtrl_G9a_GST_peak_6303	chr7	61735547	61735679	+	116	NA	Intergenic	Intergenic	1028821	NR_003952	643955	Hs.583308	NR_003952	ENSG00000185037	ZNF733P	ZNF733	zinc finger protein 733, pseudogene	pseudo
siCtrl_G9a_GST_peak_5062	chr4	112757903	112758048	+	116	NA	Intergenic	Intergenic	-308635	NM_152400	132720	Hs.23439	NM_152400	ENSG00000174749	FAM241A	C4orf32	family with sequence similarity 241 member A	protein-coding
siCtrl_G9a_GST_peak_6001	chr6	146971761	146971923	+	116	NA	intron (NM_024694, intron 3 of 35)	LTR38-int|LTR|ERV1	51734	NM_024694	79747	Hs.720870	NM_024694	ENSG00000118492	ADGB	C6orf103|CAPN16	androglobin	protein-coding
siCtrl_G9a_GST_peak_1679	chr12	30449325	30449748	+	116	NA	Intergenic	Intergenic	380642	NM_001190995	10526	Hs.505136	NM_006390	ENSG00000133704	IPO8	RANBP8	importin 8	protein-coding
siCtrl_G9a_GST_peak_3022	chr17	47502208	47502309	+	116	NA	Intergenic	Intergenic	-9991	NM_001281497	5245	Hs.514303	NM_002634	ENSG00000167085	PHB	HEL-215|HEL-S-54e|PHB1	prohibitin	protein-coding
siCtrl_G9a_GST_peak_6193	chr7	31348399	31348475	+	116	NA	Intergenic	Intergenic	31903	NM_022728	63974	Hs.45152	NM_022728	ENSG00000164600	NEUROD6	Atoh2|MATH2|Math-2|NEX1M|Nex1|bHLHa2	neuronal differentiation 6	protein-coding
siCtrl_G9a_GST_peak_6039	chr6	160313159	160313311	+	116	NA	intron (NM_001366704, intron 1 of 1)	intron (NM_001366704, intron 1 of 1)	1215	NM_002377	4142	Hs.99900	NM_002377	ENSG00000130368	MAS1	MAS|MGRA	MAS1 proto-oncogene, G protein-coupled receptor	protein-coding
siCtrl_G9a_GST_peak_2906	chr17	965684	966478	+	116	NA	intron (NM_001092, intron 9 of 21)	intron (NM_001092, intron 9 of 21)	16152	NM_001282149	29	Hs.159306	NM_001092	ENSG00000159842	ABR	MDB	ABR activator of RhoGEF and GTPase	protein-coding
siCtrl_G9a_GST_peak_364	chr1	100828730	100828799	+	116	NA	intron (NM_003672, intron 2 of 15)	LTR9|LTR|ERV1	10702	NM_001319210	8556	Hs.127411	NM_003672	ENSG00000079335	CDC14A	DFNB105|DFNB32|DFNB35|cdc14|hCDC14	cell division cycle 14A	protein-coding
siCtrl_G9a_GST_peak_5774	chr6	90737789	90737975	+	116	NA	intron (NM_021813, intron 5 of 8)	intron (NM_021813, intron 5 of 8)	133694	NM_032602	84694	Hs.334499	NM_032602	ENSG00000135355	GJA10	CX62	gap junction protein alpha 10	protein-coding
siCtrl_G9a_GST_peak_6744	chr8	92653673	92653777	+	116	NA	Intergenic	Intergenic	376183	NM_175636	862	Hs.368431	NM_004349	ENSG00000079102	RUNX1T1	AML1-MTG8|AML1T1|CBFA2T1|CDR|ETO|MTG8|ZMYND2	RUNX1 partner transcriptional co-repressor 1	protein-coding
siCtrl_G9a_GST_peak_3567	chr2	29558685	29559283	+	116	NA	intron (NM_004304, intron 5 of 28)	intron (NM_004304, intron 5 of 28)	-112218	NM_001353765	238	Hs.654469	NM_004304	ENSG00000171094	ALK	CD246|NBLST3	ALK receptor tyrosine kinase	protein-coding
siCtrl_G9a_GST_peak_5895	chr6	119030907	119030998	+	116	NA	intron (NM_001178035, intron 1 of 13)	intron (NM_001178035, intron 1 of 13)	286	NM_001178035	387119	Hs.656959	NM_206921	ENSG00000111860	CEP85L	C6orf204|NY-BR-15|bA57K17.2	centrosomal protein 85 like	protein-coding
siCtrl_G9a_GST_peak_6081	chr6	167693703	167693777	+	116	NA	Intergenic	Intergenic	-11063	NM_018974	54346	Hs.567508	NM_018974	ENSG00000112494	UNC93A	Unc-93A|dJ366N23.1|dJ366N23.2	unc-93 homolog A	protein-coding
siCtrl_G9a_GST_peak_4841	chr3	158998649	158998870	+	116	NA	intron (NM_001197108, intron 1 of 6)	intron (NM_001197108, intron 1 of 6)	-1676	NR_037483	100500803		NR_037483	ENSG00000263634	MIR3919	-	microRNA 3919	ncRNA
siCtrl_G9a_GST_peak_3787	chr2	68081634	68081834	+	116	NA	Intergenic	Intergenic	-29040	NR_110271	101927701	Hs.348697	NR_110271	ENSG00000237013	LINC01812	-	long intergenic non-protein coding RNA 1812	ncRNA
siCtrl_G9a_GST_peak_451	chr1	117160531	117160652	+	116	NA	intron (NM_001542, intron 2 of 11)	intron (NM_001542, intron 2 of 11)	-46876	NM_001144822	965	Hs.34341	NM_001779	ENSG00000116815	CD58	LFA-3|LFA3|ag3	CD58 molecule	protein-coding
siCtrl_G9a_GST_peak_5541	chr6	6907344	6907636	+	116	NA	Intergenic	Intergenic	-200486	NM_001168344	6239	Hs.298248	NM_002955	ENSG00000124782	RREB1	FINB|HNT|LZ321|RREB-1|Zep-1	ras responsive element binding protein 1	protein-coding
siCtrl_G9a_GST_peak_5844	chr6	108350571	108350716	+	116	NA	Intergenic	Intergenic	45302	NM_014028	28962	Hs.226780	NM_014028	ENSG00000081087	OSTM1	GIPN|GL|HSPC019|OPTB5	osteoclastogenesis associated transmembrane protein 1	protein-coding
siCtrl_G9a_GST_peak_724	chr1	198647654	198647737	+	116	NA	intron (NM_001267798, intron 2 of 3)	intron (NM_001267798, intron 2 of 3)	39525	NR_052021	5788	Hs.654514	NM_002838	ENSG00000081237	PTPRC	B220|CD45|CD45R|GP180|L-CA|LCA|LY5|T200	protein tyrosine phosphatase receptor type C	protein-coding
siCtrl_G9a_GST_peak_6769	chr8	96125160	96125306	+	116	NA	intron (NR_148914, intron 10 of 11)	intron (NR_148914, intron 10 of 11)	-20780	NM_024613	79666	Hs.29724	NM_024613	ENSG00000175895	PLEKHF2	EAPF|PHAFIN2|ZFYVE18	pleckstrin homology and FYVE domain containing 2	protein-coding
siCtrl_G9a_GST_peak_2219	chr13	54103989	54104085	+	116	NA	Intergenic	Intergenic	-285517	NR_047488	100861552	Hs.224691	NR_047488	ENSG00000261517	LINC00558	-	long intergenic non-protein coding RNA 558	ncRNA
siCtrl_G9a_GST_peak_7060	chr9	98335024	98335108	+	116	NA	Intergenic	Intergenic	-55727	NM_001354919	5727	Hs.494538	NM_000264	ENSG00000185920	PTCH1	BCNS|NBCCS|PTC|PTC1|PTCH	patched 1	protein-coding
siCtrl_G9a_GST_peak_392	chr1	108547457	108547557	+	116	NA	Intergenic	Intergenic	-39705	NM_006113	10451	Hs.267659	NM_006113	ENSG00000134215	VAV3	-	vav guanine nucleotide exchange factor 3	protein-coding
siCtrl_G9a_GST_peak_3512	chr2	17356763	17356963	+	116	NA	Intergenic	MSTA|LTR|ERVL-MaLR	342844	NM_001099218	729475	Hs.515802	NM_001099218	ENSG00000214842	RAD51AP2	-	RAD51 associated protein 2	protein-coding
siCtrl_G9a_GST_peak_321	chr1	94748859	94748929	+	116	NA	Intergenic	Intergenic	-35592	NM_001328664	9411	Hs.483238	NM_004815	ENSG00000137962	ARHGAP29	PARG1	Rho GTPase activating protein 29	protein-coding
siCtrl_G9a_GST_peak_98	chr1	57471077	57471348	+	116	NA	intron (NM_021080, intron 16 of 16)	intron (NM_021080, intron 16 of 16)	-39399	NM_001278543	732	Hs.391835	NM_000066	ENSG00000021852	C8B	C82	complement C8 beta chain	protein-coding
siCtrl_G9a_GST_peak_6305	chr7	64541785	64542068	+	115	NA	Intergenic	Intergenic	11010	NR_145713	109617022		NR_145713	ENSG00000206785	SNORA15B-2	SNORA15C	small nucleolar RNA, H/ACA box 15B-2	snoRNA
siCtrl_G9a_GST_peak_3129	chr17	56018396	56018620	+	115	NA	intron (NM_001271875, intron 1 of 10)	intron (NM_001271875, intron 1 of 10)	14265	NM_001271875	404093	Hs.46679	NM_001271875	ENSG00000180891	CUEDC1	-	CUE domain containing 1	protein-coding
siCtrl_G9a_GST_peak_4473	chr22	18667098	18667173	+	115	NA	intron (NR_136574, intron 1 of 3)	intron (NR_136574, intron 1 of 3)	1112	NR_136574	105379550	Hs.729779	NR_136574		LOC105379550	-	uncharacterized LOC105379550	ncRNA
siCtrl_G9a_GST_peak_5688	chr6	51682547	51682783	+	115	NA	intron (NM_138694, intron 52 of 66)	intron (NM_138694, intron 52 of 66)	195997	NR_125840	101927082	Hs.730296	NR_125840		LOC101927082	-	uncharacterized LOC101927082	ncRNA
siCtrl_G9a_GST_peak_1435	chr11	65686816	65686896	+	115	NA	promoter-TSS (NM_006442)	promoter-TSS (NM_006442)	-41	NM_006442	10589	Hs.356742	NM_006442	ENSG00000175550	DRAP1	NC2-alpha	DR1 associated protein 1	protein-coding
siCtrl_G9a_GST_peak_5188	chr5	11105822	11106050	+	115	NA	intron (NM_001364128, intron 11 of 19)	intron (NM_001364128, intron 11 of 19)	-344590	NM_001291963	1611	Hs.75189	NM_004394	ENSG00000112977	DAP	-	death associated protein	protein-coding
siCtrl_G9a_GST_peak_170	chr1	62644066	62644555	+	115	NA	Intergenic	LTR14A|LTR|ERVK	-16211	NM_019079	54596	Hs.685462	NM_019079	ENSG00000240563	L1TD1	ECAT11	LINE1 type transposase domain containing 1	protein-coding
siCtrl_G9a_GST_peak_2408	chr14	92940054	92940152	+	115	NA	intron (NM_153647, intron 13 of 17)	intron (NM_153647, intron 13 of 17)	-40022	NM_024832	79890	Hs.326822	NM_024832	ENSG00000100599	RIN3	-	Ras and Rab interactor 3	protein-coding
siCtrl_G9a_GST_peak_1687	chr12	31812259	31812392	+	115	NA	promoter-TSS (NM_001135863)	promoter-TSS (NM_001135863)	188	NM_173802	254013	Hs.740628	NM_173802	ENSG00000139160	ETFBKMT	C12orf72|ETFB-KMT|METTL20	electron transfer flavoprotein subunit beta lysine methyltransferase	protein-coding
siCtrl_G9a_GST_peak_2910	chr17	967971	968152	+	115	NA	intron (NM_001092, intron 9 of 21)	intron (NM_001092, intron 9 of 21)	14172	NM_001282149	29	Hs.159306	NM_001092	ENSG00000159842	ABR	MDB	ABR activator of RhoGEF and GTPase	protein-coding
siCtrl_G9a_GST_peak_273	chr1	84310684	84310759	+	115	NA	intron (NR_119374, intron 2 of 2)	MLT1A1|LTR|ERVL-MaLR	15508	NR_119374	101927560	Hs.559661	NR_119374	ENSG00000233008	LOC101927560	-	uncharacterized LOC101927560	ncRNA
siCtrl_G9a_GST_peak_1039	chr1	240699906	240700039	+	115	NA	intron (NM_022469, intron 1 of 1)	intron (NM_022469, intron 1 of 1)	75483	NM_022469	64388	Hs.98206	NM_022469	ENSG00000180875	GREM2	CKTSF1B2|DAND3|PRDC|STHAG9	gremlin 2, DAN family BMP antagonist	protein-coding
siCtrl_G9a_GST_peak_5212	chr5	18375805	18375971	+	115	NA	Intergenic	Intergenic	568505	NR_134286	646241	Hs.407197	NR_134286		LINC02223	-	long intergenic non-protein coding RNA 2223	ncRNA
siCtrl_G9a_GST_peak_947	chr1	223386509	223386574	+	115	NA	Intergenic	L2b|LINE|L2	-69951	NM_003268	7100	Hs.604542	NM_003268	ENSG00000187554	TLR5	MELIOS|SLE1|SLEB1|TIL3	toll like receptor 5	protein-coding
siCtrl_G9a_GST_peak_6619	chr8	36878417	36878536	+	115	NA	Intergenic	Intergenic	-100995	NR_031672	100302233		NR_031672	ENSG00000221641	MIR1268A	MIR1268|MIRN1268|hsa-mir-1268|hsa-mir-1268a	microRNA 1268a	ncRNA
siCtrl_G9a_GST_peak_5150	chr4	190198728	190198793	+	115	NA	Intergenic	Intergenic	-382000	NR_121679	101928971	Hs.519164	NR_121679	ENSG00000250739	LINC01262	TCONS_l2_00021807	long intergenic non-protein coding RNA 1262	ncRNA
siCtrl_G9a_GST_peak_6870	chr8	143130910	143131510	+	115	NA	Intergenic	Intergenic	-51553	NR_130468	100616374		NR_130468	ENSG00000265612	MIR4539	-	microRNA 4539	ncRNA
siCtrl_G9a_GST_peak_198	chr1	66779267	66779437	+	115	NA	intron (NM_001297441, intron 6 of 15)	intron (NM_001297441, intron 6 of 15)	-18439	NM_001037339	5142	Hs.198072	NM_002600	ENSG00000184588	PDE4B	DPDE4|PDEIVB	phosphodiesterase 4B	protein-coding
siCtrl_G9a_GST_peak_6030	chr6	155863401	155863659	+	115	NA	Intergenic	Intergenic	27552	NR_134596	105378068	Hs.131541	NR_134596		LOC105378068	-	uncharacterized LOC105378068	ncRNA
siCtrl_G9a_GST_peak_6935	chr9	37680081	37680268	+	115	NA	intron (NM_001371223, intron 1 of 15)	intron (NM_001371223, intron 1 of 15)	12168	NM_001371223
siCtrl_G9a_GST_peak_1555	chr11	126727920	126728113	+	115	NA	intron (NM_001301097, intron 1 of 15)	intron (NM_001301097, intron 1 of 15)	-82626	NR_046986	100874251	Hs.319053	NR_046986	ENSG00000254960	KIRREL3-AS2	-	KIRREL3 antisense RNA 2	ncRNA
siCtrl_G9a_GST_peak_345	chr1	97439331	97439480	+	115	NA	Intergenic	LTR81|LTR|Gypsy	-122074	NR_046590	100873932	Hs.682651	NR_046590	ENSG00000232878	DPYD-AS1	-	DPYD antisense RNA 1	ncRNA
siCtrl_G9a_GST_peak_1872	chr12	76119147	76119550	+	115	NA	Intergenic	Intergenic	-213959	NM_007043	11103	Hs.645517	NM_007043	ENSG00000111615	KRR1	HRB2|RIP-1	KRR1 small subunit processome component homolog	protein-coding
siCtrl_G9a_GST_peak_6075	chr6	167197464	167197539	+	115	NA	intron (NM_001318936, intron 2 of 22)	CpG	78512	NM_001318937	6196	Hs.655277	NM_021135	ENSG00000071242	RPS6KA2	HU-2|MAPKAPK1C|RSK|RSK3|S6K-alpha|S6K-alpha2|p90-RSK3|p90RSK2|pp90RSK3	ribosomal protein S6 kinase A2	protein-coding
siCtrl_G9a_GST_peak_1245	chr10	97075301	97075545	+	115	NA	intron (NM_001034954, intron 30 of 30)	intron (NM_001034954, intron 30 of 30)	-24663	NM_020992	9124	Hs.368525	NM_020992	ENSG00000107438	PDLIM1	CLIM1|CLP-36|CLP36|HEL-S-112|hCLIM1	PDZ and LIM domain 1	protein-coding
siCtrl_G9a_GST_peak_2498	chr15	47799225	47799688	+	115	NA	intron (NM_001198999, intron 3 of 19)	intron (NM_001198999, intron 3 of 19)	-210246	NM_001358351	80031	Hs.511265	NM_020858	ENSG00000137872	SEMA6D	-	semaphorin 6D	protein-coding
siCtrl_G9a_GST_peak_4620	chr3	36767830	36768105	+	115	NA	intron (NM_033403, intron 2 of 4)	intron (NM_033403, intron 2 of 4)	13385	NM_033403	85443	Hs.631907	NM_033403	ENSG00000163673	DCLK3	CLR|DCAMKL3|DCDC3C|DCK3	doublecortin like kinase 3	protein-coding
siCtrl_G9a_GST_peak_965	chr1	229167298	229167420	+	115	NA	Intergenic	Intergenic	143189	NR_039659	100616234		NR_039659	ENSG00000283468	MIR4454	-	microRNA 4454	ncRNA
siCtrl_G9a_GST_peak_3348	chr18	52712106	52712183	+	115	NA	Intergenic	L1PA10|LINE|L1	79393	NR_110743	101927229	Hs.638474	NR_110743	ENSG00000267013	LINC01929	-	long intergenic non-protein coding RNA 1929	ncRNA
siCtrl_G9a_GST_peak_5707	chr6	56440873	56440985	+	115	NA	intron (NM_001144769, intron 44 of 96)	MER21C|LTR|ERVL	66758	NM_015548	667	Hs.604915	NM_001723	ENSG00000151914	DST	BP240|BPA|BPAG1|CATX-15|CATX15|D6S1101|DMH|DT|EBSB2|HSAN6|MACF2	dystonin	protein-coding
siCtrl_G9a_GST_peak_3156	chr17	61979446	61979540	+	115	NA	Intergenic	Intergenic	-5559	NM_001317	1442	Hs.654390	NM_001317	ENSG00000136488	CSH1	CS-1|CSA|CSMT|GHB3|PL|hCS-1|hCS-A	chorionic somatomammotropin hormone 1	protein-coding
siCtrl_G9a_GST_peak_3725	chr2	55107314	55107427	+	115	NA	intron (NM_001039753, intron 16 of 40)	intron (NM_001039753, intron 16 of 40)	130038	NM_007008	57142	Hs.637850	NM_007008	ENSG00000115310	RTN4	ASY|NI220/250|NOGO|NSP|NSP-CL|Nbla00271|Nbla10545|RTN-X|RTN4-A|RTN4-B1|RTN4-B2|RTN4-C	reticulon 4	protein-coding
siCtrl_G9a_GST_peak_7054	chr9	94986304	94986395	+	115	NA	intron (NM_013417, intron 31 of 33)	ERVL-E-int|LTR|ERVL	-32911	NM_001350291	138652	Hs.742918	NM_001350291		PRSS47	-	serine protease 47	protein-coding
siCtrl_G9a_GST_peak_3985	chr2	146473353	146473449	+	115	NA	Intergenic	Intergenic	-871224	NR_026904	728773	Hs.334462	NR_026904		PABPC1P2	PABP2|PABP4|PABPCP2|PABPCP4	poly(A) binding protein cytoplasmic 1 pseudogene 2	pseudo
siCtrl_G9a_GST_peak_430	chr1	115151482	115151885	+	115	NA	intron (NM_198459, intron 6 of 17)	intron (NM_198459, intron 6 of 17)	-27447	NM_005872	10286	Hs.22960	NM_005872	ENSG00000116752	BCAS2	DAM1|SPF27|Snt309	BCAS2 pre-mRNA processing factor	protein-coding
siCtrl_G9a_GST_peak_2946	chr17	19091374	19091487	+	115	NA	non-coding (NR_006880, exon 1 of 1)	non-coding (NR_006880, exon 1 of 1)	101	NR_006880	780851		NR_006880	ENSG00000263934	SNORD3A	RNU3|U3	small nucleolar RNA, C/D box 3A	snoRNA
siCtrl_G9a_GST_peak_2507	chr15	47944936	47945081	+	115	NA	intron (NM_001198999, intron 4 of 19)	intron (NM_001198999, intron 4 of 19)	-64694	NM_001358351	80031	Hs.511265	NM_020858	ENSG00000137872	SEMA6D	-	semaphorin 6D	protein-coding
siCtrl_G9a_GST_peak_6945	chr9	42844979	42845360	+	115	NA	non-coding (NR_046175, exon 4 of 4)	non-coding (NR_046175, exon 4 of 4)	12033	NR_136299	101929583	Hs.404758	NR_136299		LOC101929583	-	methylenetetrahydrofolate dehydrogenase (NADP+ dependent) 1 like pseudogene	pseudo
siCtrl_G9a_GST_peak_7073	chr9	102196877	102196990	+	115	NA	Intergenic	Intergenic	-59394	NR_102270	100996569	Hs.745280	NR_102270	ENSG00000271086	NAMA	-	non-protein coding RNA, associated with MAP kinase pathway and growth arrest	ncRNA
siCtrl_G9a_GST_peak_5538	chr6	6681884	6681969	+	114	NA	Intergenic	MIRb|SINE|MIR	-58867	NR_026970	285780	Hs.655737	NM_173675	ENSG00000216863	LY86-AS1	LY86-AS|LY86AS	LY86 antisense RNA 1	ncRNA
siCtrl_G9a_GST_peak_1841	chr12	68617892	68617959	+	114	NA	intron (NM_018402, intron 3 of 4)	intron (NM_018402, intron 3 of 4)	1665	NM_018402	55801	Hs.272350	NM_018402	ENSG00000111536	IL26	AK155|IL-26	interleukin 26	protein-coding
siCtrl_G9a_GST_peak_1453	chr11	72021061	72021274	+	114	NA	intron (NM_030813, intron 8 of 16)	intron (NM_030813, intron 8 of 16)	-65947	NM_005169	401	Hs.731115	NM_005169	ENSG00000165462	PHOX2A	ARIX|CFEOM2|FEOM2|NCAM2|PMX2A	paired like homeobox 2A	protein-coding
siCtrl_G9a_GST_peak_3073	chr17	53517752	53517871	+	114	NA	Intergenic	Intergenic	-18615	NM_012329	23531	Hs.463483	NM_012329	ENSG00000108960	MMD	MMA|MMD1|PAQR11	monocyte to macrophage differentiation associated	protein-coding
siCtrl_G9a_GST_peak_930	chr1	221437220	221437394	+	114	NA	Intergenic	Intergenic	72331	NR_024236	400804	Hs.722626	NR_024236	ENSG00000234754	C1orf140	-	uncharacterized LOC400804	ncRNA
siCtrl_G9a_GST_peak_5715	chr6	64030948	64031060	+	114	NA	Intergenic	Intergenic	-1116	NM_016571	51557	Hs.149585	NM_016571	ENSG00000146166	LGSN	GLULD1|LGS	lengsin, lens protein with glutamine synthetase domain	protein-coding
siCtrl_G9a_GST_peak_1451	chr11	72019340	72019692	+	114	NA	intron (NM_030813, intron 9 of 16)	intron (NM_030813, intron 9 of 16)	-64296	NM_005169	401	Hs.731115	NM_005169	ENSG00000165462	PHOX2A	ARIX|CFEOM2|FEOM2|NCAM2|PMX2A	paired like homeobox 2A	protein-coding
siCtrl_G9a_GST_peak_332	chr1	95472286	95472364	+	114	NA	intron (NR_131032, intron 2 of 2)	intron (NR_131032, intron 2 of 2)	-54827	NR_132786	101928098	Hs.730090	NR_132786	ENSG00000230427	LOC101928098	-	uncharacterized LOC101928098	ncRNA
siCtrl_G9a_GST_peak_4431	chr21	35266381	35266451	+	114	NA	3' UTR (NM_003024, exon 40 of 40)	3' UTR (NM_003024, exon 40 of 40)	21692	NM_001697	539	Hs.409140	NM_001697	ENSG00000241837	ATP5PO	ATP5O|ATPO|HMC08D05|OSCP	ATP synthase peripheral stalk subunit OSCP	protein-coding
siCtrl_G9a_GST_peak_5638	chr6	37391730	37391811	+	114	NA	Intergenic	LTR9|LTR|ERV1	-9227	NM_015050	23070	Hs.520102	NM_015050	ENSG00000137200	CMTR1	FTSJD2|KIAA0082|MTr1|hMTr1	cap methyltransferase 1	protein-coding
siCtrl_G9a_GST_peak_1685	chr12	31015965	31016321	+	114	NA	Intergenic	Intergenic	-63539	NM_001370302	441631	Hs.505141	NM_001080509	ENSG00000110900	TSPAN11	VSSW1971	tetraspanin 11	protein-coding
siCtrl_G9a_GST_peak_3494	chr2	7837918	7838198	+	114	NA	Intergenic	Intergenic	201728	NR_110256	101929551	Hs.116006	NR_110256	ENSG00000226506	LOC101929551	-	uncharacterized LOC101929551	ncRNA
siCtrl_G9a_GST_peak_5931	chr6	130182211	130182681	+	114	NA	promoter-TSS (NM_001010876)	promoter-TSS (NM_001010876)	14	NM_001010876	253582		NM_001010876	ENSG00000203756	TMEM244	C6orf191|bA174C7.4	transmembrane protein 244	protein-coding
siCtrl_G9a_GST_peak_265	chr1	78758243	78758340	+	114	NA	intron (NR_027310, intron 3 of 5)	MLT1I|LTR|ERVL-MaLR	63008	NR_027310	149047	Hs.352665	NM_144700	ENSG00000237413	MGC27382	-	uncharacterized MGC27382	ncRNA
siCtrl_G9a_GST_peak_2612	chr15	69830376	69830468	+	114	NA	Intergenic	Intergenic	-23637	NR_026979	145837	Hs.410126	NR_026979		DRAIC	-	downregulated RNA in cancer, inhibitor of cell invasion and migration	ncRNA
siCtrl_G9a_GST_peak_1734	chr12	45564392	45564502	+	114	NA	Intergenic	Intergenic	45342	NR_037144	51054	Hs.233495	NM_015899	ENSG00000134297	PLEKHA8P1	FAPP-2|FAPP2|PLEKHA8|PLEKHA9|hFAPP2	pleckstrin homology domain containing A8 pseudogene 1	pseudo
siCtrl_G9a_GST_peak_5854	chr6	110680349	110680477	+	113	NA	promoter-TSS (NM_001354594)	promoter-TSS (NM_001354594)	-938	NM_001354594	728464	Hs.634429	NM_001123364	ENSG00000053328	METTL24	C6orf186	methyltransferase like 24	protein-coding
siCtrl_G9a_GST_peak_6642	chr8	41255579	41255669	+	113	NA	Intergenic	Intergenic	-28550	NR_145746	109616980		NR_145746	ENSG00000238936	SNORD65B	-	small nucleolar RNA, C/D box 65B	snoRNA
siCtrl_G9a_GST_peak_4122	chr2	208117856	208117924	+	113	NA	intron (NR_110283, intron 1 of 3)	intron (NR_110283, intron 1 of 3)	1150	NR_110283	101927865	Hs.574609	NR_110283		MYOSLID-AS1	-	MYOSLID antisense RNA 1	ncRNA
siCtrl_G9a_GST_peak_1587	chr12	3981882	3982048	+	113	NA	intron (NM_001286522, intron 1 of 7)	intron (NM_001286522, intron 1 of 7)	600	NM_001286522	57097	Hs.657268	NM_020367	ENSG00000111224	PARP11	ARTD11|C12orf6|MIB006	poly(ADP-ribose) polymerase family member 11	protein-coding
siCtrl_G9a_GST_peak_2054	chr12	119726668	119727202	+	113	NA	intron (NR_024246, intron 2 of 3)	intron (NR_024246, intron 2 of 3)	14250	NR_024246	144742	Hs.524782	NR_024246	ENSG00000281196	LINC00934	-	long intergenic non-protein coding RNA 934	ncRNA
siCtrl_G9a_GST_peak_4402	chr21	9892050	9892110	+	113	NA	Intergenic	Intergenic	65630	NR_162105	113218501		NR_162105		MIR10396A	-	microRNA 10396a	ncRNA
siCtrl_G9a_GST_peak_4744	chr3	108204131	108204214	+	113	NA	intron (NM_014981, intron 11 of 41)	intron (NM_014981, intron 11 of 41)	43997	NM_014981	22989	Hs.731060	NM_014981	ENSG00000144821	MYH15	-	myosin heavy chain 15	protein-coding
siCtrl_G9a_GST_peak_49	chr1	53940899	53941140	+	113	NA	Intergenic	Intergenic	15947	NM_033067	63948	Hs.131654	NM_033067	ENSG00000143006	DMRTB1	-	DMRT like family B with proline rich C-terminal 1	protein-coding
siCtrl_G9a_GST_peak_3034	chr17	49870692	49870762	+	113	NA	intron (NM_001082533, intron 4 of 9)	intron (NM_001082533, intron 4 of 9)	357939	NR_146897	105371828	Hs.640153	NR_146897		LINC02073	-	long intergenic non-protein coding RNA 2073	ncRNA
siCtrl_G9a_GST_peak_4776	chr3	123836974	123837086	+	113	NA	intron (NM_001024660, intron 1 of 59)	intron (NM_001024660, intron 1 of 59)	-14746	NR_049798	100847021		NR_049798	ENSG00000266383	MIR5002	-	microRNA 5002	ncRNA
siCtrl_G9a_GST_peak_5810	chr6	103530760	103530881	+	113	NA	Intergenic	AluY|SINE|Alu	1683959	NM_021956	2898	Hs.98262	NM_021956	ENSG00000164418	GRIK2	EAA4|GLR6|GLUK6|GLUR6|GluK2|MRT6	glutamate ionotropic receptor kainate type subunit 2	protein-coding
siCtrl_G9a_GST_peak_5317	chr5	75365071	75365243	+	113	NA	Intergenic	Intergenic	-14051	NM_001297716	22987	Hs.646953	NM_014979	ENSG00000122012	SV2C	-	synaptic vesicle glycoprotein 2C	protein-coding
siCtrl_G9a_GST_peak_2725	chr15	92905080	92905139	+	113	NA	Intergenic	Intergenic	-32002	NM_006011	8128	Hs.302341	NM_006011	ENSG00000140557	ST8SIA2	HsT19690|SIAT8-B|SIAT8B|ST8SIA-II|ST8SiaII|STX	ST8 alpha-N-acetyl-neuraminide alpha-2,8-sialyltransferase 2	protein-coding
siCtrl_G9a_GST_peak_5839	chr6	106702927	106703018	+	113	NA	intron (NM_001286111, intron 2 of 4)	intron (NM_001286111, intron 2 of 4)	61169	NR_104402	9474	Hs.486063	NM_004849	ENSG00000057663	ATG5	APG5|APG5-LIKE|APG5L|ASP|SCAR25|hAPG5	autophagy related 5	protein-coding
siCtrl_G9a_GST_peak_5714	chr6	64030769	64030861	+	113	NA	promoter-TSS (NM_016571)	promoter-TSS (NM_016571)	-927	NM_016571	51557	Hs.149585	NM_016571	ENSG00000146166	LGSN	GLULD1|LGS	lengsin, lens protein with glutamine synthetase domain	protein-coding
siCtrl_G9a_GST_peak_1391	chr11	27237559	27237622	+	113	NA	intron (NR_125767, intron 2 of 4)	intron (NR_125767, intron 2 of 4)	2725	NR_125768	103695435	Hs.196133	NR_125766	ENSG00000254560	BBOX1-AS1	-	BBOX1 antisense RNA 1	ncRNA
siCtrl_G9a_GST_peak_3282	chr18	8286208	8286586	+	113	NA	intron (NM_001105244, intron 19 of 32)	intron (NM_001105244, intron 19 of 32)	80635	NR_024419	100192426	Hs.666655	NR_024419	ENSG00000266149	LOC100192426	-	uncharacterized LOC100192426	ncRNA
siCtrl_G9a_GST_peak_4483	chr22	18814381	18814512	+	113	NA	Intergenic	Intergenic	-23185	NR_135922	102725072	Hs.745076	NR_135922	ENSG00000161103	LOC102725072	-	Putative uncharacterized protein DKFZp434K191	pseudo
siCtrl_G9a_GST_peak_1375	chr11	19759145	19759255	+	113	NA	intron (NM_001244963, intron 1 of 39)	MIR|SINE|MIR	22429	NR_039843	100616426		NR_039843	ENSG00000264309	MIR4694	-	microRNA 4694	ncRNA
siCtrl_G9a_GST_peak_3392	chr19	381926	382127	+	113	NA	Intergenic	Intergenic	-6000	NM_016585	51298	Hs.250002	NM_016585	ENSG00000105549	THEG	CT56|THEG1	theg spermatid protein	protein-coding
siCtrl_G9a_GST_peak_5387	chr5	124820503	124820612	+	113	NA	Intergenic	Intergenic	-8397	NR_109887	101927460	Hs.407582	NR_109887	ENSG00000260192	LINC02240	-	long intergenic non-protein coding RNA 2240	ncRNA
siCtrl_G9a_GST_peak_6016	chr6	153096680	153096759	+	113	NA	Intergenic	MLT1E1|LTR|ERVL-MaLR	24787	NM_194435	7432	Hs.53973	NM_003381	ENSG00000146469	VIP	PHM27	vasoactive intestinal peptide	protein-coding
siCtrl_G9a_GST_peak_5930	chr6	129928964	129929115	+	113	NA	exon (NM_033515, exon 9 of 15)	exon (NM_033515, exon 9 of 15)	102283	NM_033515	93663	Hs.486458	NM_033515	ENSG00000146376	ARHGAP18	MacGAP|SENEX|bA307O14.2	Rho GTPase activating protein 18	protein-coding
siCtrl_G9a_GST_peak_6681	chr8	52557743	52557918	+	113	NA	intron (NM_144651, intron 2 of 22)	MLT2B1|LTR|ERVL	164175	NM_144651	137902	Hs.444882	NM_144651	ENSG00000147485	PXDNL	PMR1|PRM1|VPO2	peroxidasin like	protein-coding
siCtrl_G9a_GST_peak_5271	chr5	61105669	61106061	+	113	NA	Intergenic	Intergenic	-74340	NR_105000	100506526	Hs.662277	NR_105000		C5orf64-AS1	-	C5orf64 antisense RNA 1	ncRNA
siCtrl_G9a_GST_peak_4875	chr3	194451223	194451399	+	113	NA	intron (NR_037891, intron 1 of 3)	LTR9|LTR|ERV1	22161	NR_037891	100507391	Hs.590099	NR_037891	ENSG00000237222	LINC01968	-	long intergenic non-protein coding RNA 1968	ncRNA
siCtrl_G9a_GST_peak_2774	chr16	4295232	4295304	+	113	NA	TTS (NR_039999)	TTS (NR_039999)	-3187	NM_001323667	6345	Hs.10041	NM_001098814	ENSG00000185739	SRL	SAR	sarcalumenin	protein-coding
siCtrl_G9a_GST_peak_2609	chr15	69438080	69438429	+	112	NA	Intergenic	Intergenic	-14682	NM_001324091	26035	Hs.183006	NM_015554	ENSG00000138604	GLCE	HSEPI	glucuronic acid epimerase	protein-coding
siCtrl_G9a_GST_peak_1652	chr12	26898063	26898160	+	112	NA	intron (NM_002223, intron 2 of 56)	intron (NM_002223, intron 2 of 56)	88016	NM_002223	3709	Hs.512235	NM_002223	ENSG00000123104	ITPR2	ANHD|CFAP48|INSP3R2|IP3R2	inositol 1,4,5-trisphosphate receptor type 2	protein-coding
siCtrl_G9a_GST_peak_2793	chr16	10881139	10881457	+	112	NA	intron (NM_001318873, intron 2 of 7)	LTR9|LTR|ERV1	31353	NR_134901	780776	Hs.371576	NM_001079512	ENSG00000166676	TVP23A	FAM18A|YDR084C	trans-golgi network vesicle protein 23 homolog A	protein-coding
siCtrl_G9a_GST_peak_4012	chr2	162137126	162137191	+	112	NA	Intergenic	Intergenic	-26004	NR_110593	101929512	Hs.666488	NR_110593		LOC101929512	-	uncharacterized LOC101929512	ncRNA
siCtrl_G9a_GST_peak_3027	chr17	48950766	48950852	+	112	NA	Intergenic	Intergenic	-5470	NM_001243877	10140	Hs.703321	NM_005749	ENSG00000141232	TOB1	APRO5|APRO6|PIG49|TOB|TROB|TROB1	transducer of ERBB2, 1	protein-coding
siCtrl_G9a_GST_peak_2510	chr15	48001283	48001545	+	112	NA	intron (NM_001198999, intron 4 of 19)	LTR33|LTR|ERVL	-8288	NM_001358351	80031	Hs.511265	NM_020858	ENSG00000137872	SEMA6D	-	semaphorin 6D	protein-coding
siCtrl_G9a_GST_peak_3557	chr2	23764388	23764450	+	112	NA	intron (NM_052920, intron 2 of 13)	intron (NM_052920, intron 2 of 13)	156369	NM_052920	114818	Hs.130593	NM_025067	ENSG00000119771	KLHL29	KBTBD9	kelch like family member 29	protein-coding
siCtrl_G9a_GST_peak_7000	chr9	72748426	72748577	+	112	NA	intron (NM_001347990, intron 7 of 11)	intron (NM_001347990, intron 7 of 11)	42303	NR_040076	100507244	Hs.556816	NR_040076	ENSG00000204706	MAMDC2-AS1	-	MAMDC2 antisense RNA 1	ncRNA
siCtrl_G9a_GST_peak_1371	chr11	19562897	19563113	+	112	NA	intron (NM_001111018, intron 1 of 37)	intron (NM_001111018, intron 1 of 37)	-17380	NR_033989	399876	Hs.132600	NR_033989	ENSG00000254622	NAV2-AS4	-	NAV2 antisense RNA 4	ncRNA
siCtrl_G9a_GST_peak_4564	chr3	11995789	11995873	+	112	NA	Intergenic	MIRb|SINE|MIR	-50003	NM_003178	6854	Hs.445503	NM_003178	ENSG00000157152	SYN2	SYNII	synapsin II	protein-coding
siCtrl_G9a_GST_peak_3679	chr2	46110020	46110169	+	112	NA	intron (NM_005400, intron 2 of 14)	intron (NM_005400, intron 2 of 14)	231280	NM_005400	5581	Hs.580351	NM_005400	ENSG00000171132	PRKCE	PKCE|nPKC-epsilon	protein kinase C epsilon	protein-coding
siCtrl_G9a_GST_peak_989	chr1	232438529	232438598	+	112	NA	Intergenic	Intergenic	212791	NM_020808	57568	Hs.745009	NM_020808	ENSG00000116991	SIPA1L2	SPAL2|SPAR2	signal induced proliferation associated 1 like 2	protein-coding
siCtrl_G9a_GST_peak_4220	chr20	6121717	6121801	+	112	NA	Intergenic	MLT1K|LTR|ERVL-MaLR	-17568	NM_017671	55612	Hs.472054	NM_017671	ENSG00000101311	FERMT1	C20orf42|DTGCU2|KIND1|UNC112A|URP1	fermitin family member 1	protein-coding
siCtrl_G9a_GST_peak_3794	chr2	68919913	68920057	+	112	NA	Intergenic	Intergenic	-41958	NM_001007231	9938	Hs.531807	NM_014882	ENSG00000163219	ARHGAP25	HEL-S-308|KAIA0053	Rho GTPase activating protein 25	protein-coding
siCtrl_G9a_GST_peak_916	chr1	220673853	220673949	+	112	NA	Intergenic	MLT1F2|LTR|ERVL-MaLR	-27577	NM_018650	4139	Hs.497806	NM_018650	ENSG00000116141	MARK1	MARK|Par-1c|Par1c	microtubule affinity regulating kinase 1	protein-coding
siCtrl_G9a_GST_peak_6736	chr8	86834424	86834496	+	112	NA	Intergenic	MIR|SINE|MIR	5711	NR_003594	100288527	Hs.535056	NR_003594		REXO1L2P	-	REXO1 like 2, pseudogene	pseudo
siCtrl_G9a_GST_peak_5215	chr5	25029193	25029309	+	112	NA	Intergenic	Intergenic	161514	NR_147006	105374694		NR_147006	ENSG00000251273	LINC02228	-	long intergenic non-protein coding RNA 2228	ncRNA
siCtrl_G9a_GST_peak_838	chr1	210896236	210896349	+	112	NA	intron (NM_002238, intron 10 of 10)	intron (NM_002238, intron 10 of 10)	393582	NM_001170580	55733	Hs.58650	NM_018194	ENSG00000054392	HHAT	MART2|SKI1|Skn	hedgehog acyltransferase	protein-coding
siCtrl_G9a_GST_peak_2638	chr15	73894201	73894275	+	112	NA	intron (NM_001161363, intron 1 of 8)	intron (NM_001161363, intron 1 of 8)	31492	NM_012428	27020	Hs.744867	NM_012428	ENSG00000156642	NPTN	GP55|GP65|SDFR1|SDR1|np55|np65	neuroplastin	protein-coding
siCtrl_G9a_GST_peak_6969	chr9	68477810	68477946	+	112	NA	Intergenic	MER91A|DNA|hAT-Tip100	-22510	NR_033907	642236	Hs.650100	NR_033907		FRG1JP	-	FSHD region gene 1 family member J, pseudogene	pseudo
siCtrl_G9a_GST_peak_650	chr1	168274085	168274161	+	111	NA	intron (NM_005149, intron 5 of 7)	intron (NM_005149, intron 5 of 7)	24008	NM_005149	9095	Hs.716656	NM_005149	ENSG00000143178	TBX19	TBS19|TPIT|dJ747L4.1	T-box transcription factor 19	protein-coding
siCtrl_G9a_GST_peak_2788	chr16	8048987	8049208	+	111	NA	Intergenic	Intergenic	538731	NM_001290098	283953	Hs.150849	NM_001146336	ENSG00000232258	TMEM114	-	transmembrane protein 114	protein-coding
siCtrl_G9a_GST_peak_5048	chr4	91041551	91041884	+	111	NA	Intergenic	MLT1G1|LTR|ERVL-MaLR	-6967	NM_001145065	401145	Hs.654735	NM_207491	ENSG00000184305	CCSER1	FAM190A	coiled-coil serine rich protein 1	protein-coding
siCtrl_G9a_GST_peak_101	chr1	57484361	57484830	+	111	NA	intron (NM_021080, intron 13 of 16)	L2c|LINE|L2	-52782	NM_001278543	732	Hs.391835	NM_000066	ENSG00000021852	C8B	C82	complement C8 beta chain	protein-coding
siCtrl_G9a_GST_peak_5244	chr5	53098516	53098575	+	111	NA	intron (NR_147168, intron 1 of 3)	L1PA4|LINE|L1	16967	NR_147167	105378966	Hs.570949	NR_147167		LINC02105	-	long intergenic non-protein coding RNA 2105	ncRNA
siCtrl_G9a_GST_peak_5326	chr5	85587938	85588000	+	111	NA	intron (NR_003719, intron 6 of 7)	intron (NR_003719, intron 6 of 7)	9707	NR_003719	285622	Hs.449272	NR_003719		NBPF22P	-	NBPF member 22, pseudogene	pseudo
siCtrl_G9a_GST_peak_1799	chr12	66926390	66926450	+	111	NA	intron (NM_021150, intron 4 of 23)	MLT1H2|LTR|ERVL-MaLR	146436	NM_021150	23426	Hs.505946	NM_021150	ENSG00000155974	GRIP1	FRASRS3|GRIP	glutamate receptor interacting protein 1	protein-coding
siCtrl_G9a_GST_peak_1083	chr10	15902578	15902955	+	111	NA	promoter-TSS (NM_001318330)	promoter-TSS (NM_001318330)	-234	NM_001318330	80013	Hs.158870	NM_024948	ENSG00000148481	MINDY3	C10orf97|CARP|DERP5|FAM188A|MST126|MSTP126|my042	MINDY lysine 48 deubiquitinase 3	protein-coding
siCtrl_G9a_GST_peak_3347	chr18	52493660	52493791	+	111	NA	Intergenic	Intergenic	-1983	NM_004163	5874	Hs.25318	NM_004163	ENSG00000041353	RAB27B	C25KG	RAB27B, member RAS oncogene family	protein-coding
siCtrl_G9a_GST_peak_6965	chr9	68426066	68426412	+	111	NA	Intergenic	Intergenic	-10851	NR_039688	100616184		NR_039688	ENSG00000276029	MIR4477A	-	microRNA 4477a	ncRNA
siCtrl_G9a_GST_peak_3546	chr2	22673722	22673859	+	111	NA	Intergenic	Intergenic	-85561	NR_110577	102723362	Hs.502887	NR_110577	ENSG00000233587	LINC01884	-	long intergenic non-protein coding RNA 1884	ncRNA
siCtrl_G9a_GST_peak_7017	chr9	80184150	80184219	+	111	NA	intron (NM_004297, intron 1 of 6)	intron (NM_004297, intron 1 of 6)	79054	NM_004297	9630	Hs.657795	NM_004297	ENSG00000156049	GNA14	-	G protein subunit alpha 14	protein-coding
siCtrl_G9a_GST_peak_2721	chr15	92312518	92312686	+	111	NA	Intergenic	Intergenic	-84336	NM_001145044	28232	Hs.311187	NM_013272	ENSG00000176463	SLCO3A1	OATP-D|OATP-RP3|OATP3A1|OATPD|OATPRP3|SLC21A11	solute carrier organic anion transporter family member 3A1	protein-coding
siCtrl_G9a_GST_peak_4045	chr2	178618747	178618835	+	111	NA	intron (NM_001077197, intron 11 of 20)	intron (NM_001077197, intron 11 of 20)	80741	NR_136171	105373764	Hs.666361	NR_136171	ENSG00000229941	LOC105373764	-	uncharacterized LOC105373764	ncRNA
siCtrl_G9a_GST_peak_346	chr1	97444248	97444369	+	111	NA	Intergenic	Intergenic	-117171	NR_046590	100873932	Hs.682651	NR_046590	ENSG00000232878	DPYD-AS1	-	DPYD antisense RNA 1	ncRNA
siCtrl_G9a_GST_peak_3515	chr2	17358437	17359098	+	111	NA	Intergenic	Intergenic	340940	NM_001099218	729475	Hs.515802	NM_001099218	ENSG00000214842	RAD51AP2	-	RAD51 associated protein 2	protein-coding
siCtrl_G9a_GST_peak_2285	chr13	103241788	103241864	+	111	NA	Intergenic	Intergenic	-7510	NM_001330588	7174	Hs.432424	NM_003291	ENSG00000134900	TPP2	TPP-2|TPP-II|TPPII	tripeptidyl peptidase 2	protein-coding
siCtrl_G9a_GST_peak_6232	chr7	36586042	36586185	+	111	NA	intron (NM_001637, intron 15 of 20)	intron (NM_001637, intron 15 of 20)	53613	NR_046764	100874264	Hs.690994	NR_046764	ENSG00000230539	AOAH-IT1	-	AOAH intronic transcript 1	ncRNA
siCtrl_G9a_GST_peak_6678	chr8	49704959	49705039	+	111	NA	Intergenic	Intergenic	-57129	NR_157026	79645	Hs.23245	NM_024593	ENSG00000034239	EFCAB1	-	EF-hand calcium binding domain 1	protein-coding
siCtrl_G9a_GST_peak_3786	chr2	68081101	68081511	+	111	NA	Intergenic	Intergenic	-28612	NR_110271	101927701	Hs.348697	NR_110271	ENSG00000237013	LINC01812	-	long intergenic non-protein coding RNA 1812	ncRNA
siCtrl_G9a_GST_peak_3236	chr17	72074919	72075043	+	110	NA	Intergenic	Intergenic	-124836	NM_000999	6169	Hs.380953	NM_000999	ENSG00000172809	RPL38	L38	ribosomal protein L38	protein-coding
siCtrl_G9a_GST_peak_5156	chr4	190908686	190908772	+	110	NA	Intergenic	PRIMA41-int|LTR|ERV1	39683	NM_001286820	448831	Hs.626907	NM_001005217	ENSG00000205097	FRG2	FRG2A	FSHD region gene 2	protein-coding
siCtrl_G9a_GST_peak_630	chr1	165445998	165446215	+	110	NA	TTS (NR_026744)	TTS (NR_026744)	-31514	NM_001256570	6258	Hs.26550	NM_006917	ENSG00000143171	RXRG	NR2B3|RXRC	retinoid X receptor gamma	protein-coding
siCtrl_G9a_GST_peak_3744	chr2	60772460	60772574	+	110	NA	intron (NM_022893, intron 2 of 3)	intron (NM_022893, intron 2 of 3)	8116	NM_001365609	53335	Hs.370549	NM_018014	ENSG00000119866	BCL11A	BCL11A-L|BCL11A-S|BCL11A-XL|BCL11a-M|CTIP1|DILOS|EVI9|HBFQTL5|ZNF856	BAF chromatin remodeling complex subunit BCL11A	protein-coding
siCtrl_G9a_GST_peak_1104	chr10	30302406	30302465	+	110	NA	3' UTR (NM_020848, exon 4 of 4)	3' UTR (NM_020848, exon 4 of 4)	46080	NM_001350001	57608	Hs.533953	NM_020848	ENSG00000165757	JCAD	KIAA1462	junctional cadherin 5 associated	protein-coding
siCtrl_G9a_GST_peak_1601	chr12	15089492	15089661	+	110	NA	intron (NM_152321, intron 2 of 6)	THE1D|LTR|ERVL-MaLR	1895	NM_152321	121506	Hs.162143	NM_152321	ENSG00000139055	ERP27	C12orf46|PDIA8	endoplasmic reticulum protein 27	protein-coding
siCtrl_G9a_GST_peak_3161	chr17	62859075	62859284	+	110	NA	intron (NM_199340, intron 10 of 14)	intron (NM_199340, intron 10 of 14)	-25877	NR_024386	440456	Hs.646585	NR_024386		PLEKHM1P1	PLEKHM1P	pleckstrin homology and RUN domain containing M1 pseudogene 1	pseudo
siCtrl_G9a_GST_peak_182	chr1	64224862	64224987	+	110	NA	Intergenic	MER102b|DNA|hAT-Charlie	-14764	NM_005012	4919	Hs.128753	NM_005012	ENSG00000185483	ROR1	NTRKR1|dJ537F10.1	receptor tyrosine kinase like orphan receptor 1	protein-coding
siCtrl_G9a_GST_peak_734	chr1	201214303	201214393	+	110	NA	Intergenic	MLT1A|LTR|ERVL-MaLR	-38232	NM_000299	5317	Hs.497350	NM_000299	ENSG00000081277	PKP1	B6P	plakophilin 1	protein-coding
siCtrl_G9a_GST_peak_6260	chr7	42493577	42493882	+	110	NA	Intergenic	Intergenic	-216921	NM_000168	2737	Hs.21509	NM_000168	ENSG00000106571	GLI3	ACLS|GCPS|GLI3-190|GLI3FL|PAP-A|PAPA|PAPA1|PAPB|PHS|PPDIV	GLI family zinc finger 3	protein-coding
siCtrl_G9a_GST_peak_7131	chr9	129893590	129893954	+	110	NA	intron (NM_014636, intron 8 of 18)	MIRb|SINE|MIR	-8858	NM_012098	23452	Hs.653262	NM_012098	ENSG00000136859	ANGPTL2	ARP2|HARP	angiopoietin like 2	protein-coding
siCtrl_G9a_GST_peak_793	chr1	209333373	209333595	+	110	NA	Intergenic	MER50|LTR|ERV1	-165317	NR_135085	105372897	Hs.116154	NR_135085	ENSG00000227940	LINC01696	-	long intergenic non-protein coding RNA 1696	ncRNA
siCtrl_G9a_GST_peak_2500	chr15	47805753	47805842	+	110	NA	intron (NM_001198999, intron 3 of 19)	intron (NM_001198999, intron 3 of 19)	-203905	NM_001358351	80031	Hs.511265	NM_020858	ENSG00000137872	SEMA6D	-	semaphorin 6D	protein-coding
siCtrl_G9a_GST_peak_5888	chr6	118259619	118259720	+	110	NA	intron (NM_001029858, intron 1 of 7)	intron (NM_001029858, intron 1 of 7)	31242	NM_001029858	222553	Hs.654841	NM_001029858	ENSG00000196376	SLC35F1	C6orf169|dJ230I3.1	solute carrier family 35 member F1	protein-coding
siCtrl_G9a_GST_peak_4356	chr20	47348191	47348257	+	110	NA	intron (NM_020820, intron 4 of 39)	intron (NM_020820, intron 4 of 39)	96312	NM_020820	57580	Hs.153310	NM_020820	ENSG00000124126	PREX1	P-REX1	phosphatidylinositol-3,4,5-trisphosphate dependent Rac exchange factor 1	protein-coding
siCtrl_G9a_GST_peak_5404	chr5	138037402	138037467	+	110	NA	Intergenic	MLT1L|LTR|ERVL-MaLR	51564	NR_134245	105379194	Hs.445981	NR_134244	ENSG00000253404	LOC105379194	-	uncharacterized LOC105379194	ncRNA
siCtrl_G9a_GST_peak_210	chr1	68179147	68179240	+	110	NA	intron (NM_018841, intron 2 of 3)	intron (NM_018841, intron 2 of 3)	28309	NM_001199741	1647	Hs.80409	NM_001924	ENSG00000116717	GADD45A	DDIT1|GADD45	growth arrest and DNA damage inducible alpha	protein-coding
siCtrl_G9a_GST_peak_6543	chr7	154536709	154536768	+	110	NA	intron (NR_157196, intron 8 of 25)	intron (NR_157196, intron 8 of 25)	-183489	NR_024477	100132707	Hs.586358	NR_024476	ENSG00000214106	PAXIP1-AS2	PAXIP1OS	PAXIP1 antisense RNA 2	ncRNA
siCtrl_G9a_GST_peak_3550	chr2	22977426	22977842	+	110	NA	Intergenic	Intergenic	218283	NR_110577	102723362	Hs.502887	NR_110577	ENSG00000233587	LINC01884	-	long intergenic non-protein coding RNA 1884	ncRNA
siCtrl_G9a_GST_peak_2241	chr13	77422885	77422952	+	110	NA	Intergenic	Intergenic	37622	NM_138444	115207	Hs.644125	NM_138444	ENSG00000178695	KCTD12	C13orf2|PFET1|PFETIN	potassium channel tetramerization domain containing 12	protein-coding
siCtrl_G9a_GST_peak_2013	chr12	106931379	106931684	+	110	NA	intron (NR_040246, intron 1 of 3)	L1MC3|LINE|L1	-45154	NM_213594	5992	Hs.388827	NM_002920	ENSG00000111783	RFX4	NYD-SP10	regulatory factor X4	protein-coding
siCtrl_G9a_GST_peak_108	chr1	58907016	58907083	+	110	NA	Intergenic	Intergenic	105349	NM_145243	115209	Hs.425769	NM_145243	ENSG00000162600	OMA1	2010001O09Rik|DAB1|MPRP-1|MPRP1|YKR087C|ZMPOMA1|peptidase	OMA1 zinc metallopeptidase	protein-coding
siCtrl_G9a_GST_peak_2274	chr13	98938481	98938949	+	110	NA	intron (NM_001286839, intron 2 of 27)	THE1B|LTR|ERVL-MaLR	77937	NR_036129	100422881		NR_036129	ENSG00000263399	MIR3170	mir-3170	microRNA 3170	ncRNA
siCtrl_G9a_GST_peak_3082	chr17	53712231	53712486	+	110	NA	Intergenic	Intergenic	87867	NM_018286	55273	Hs.173233	NM_018286	ENSG00000166292	TMEM100	-	transmembrane protein 100	protein-coding
siCtrl_G9a_GST_peak_4655	chr3	57071150	57071209	+	110	NA	intron (NM_001128615, intron 1 of 12)	intron (NM_001128615, intron 1 of 12)	-23513	NM_181727	353324	Hs.129794	NM_181727	ENSG00000186451	SPATA12	SRG5	spermatogenesis associated 12	protein-coding
siCtrl_G9a_GST_peak_3568	chr2	29570859	29571103	+	110	NA	intron (NM_004304, intron 5 of 28)	intron (NM_004304, intron 5 of 28)	-124215	NM_001353765	238	Hs.654469	NM_004304	ENSG00000171094	ALK	CD246|NBLST3	ALK receptor tyrosine kinase	protein-coding
siCtrl_G9a_GST_peak_5771	chr6	90710982	90711238	+	110	NA	intron (NM_021813, intron 6 of 8)	7SK|RNA|RNA	106922	NM_032602	84694	Hs.334499	NM_032602	ENSG00000135355	GJA10	CX62	gap junction protein alpha 10	protein-coding
siCtrl_G9a_GST_peak_3117	chr17	55644133	55644445	+	110	NA	intron (NM_001322250, intron 7 of 13)	intron (NM_001322250, intron 7 of 13)	41484	NR_110807	101927539	Hs.680439	NR_110807	ENSG00000263499	LOC101927539	-	uncharacterized LOC101927539	ncRNA
siCtrl_G9a_GST_peak_1648	chr12	26113146	26113321	+	110	NA	promoter-TSS (NR_038228)	promoter-TSS (NR_038228)	-858	NR_038228	100506451	Hs.560092	NR_038227		RASSF8-AS1	-	RASSF8 antisense RNA 1	ncRNA
siCtrl_G9a_GST_peak_6361	chr7	71439809	71440101	+	110	NA	intron (NM_001017440, intron 4 of 5)	intron (NM_001017440, intron 4 of 5)	362421	NM_001017440	83698	Hs.592750	NM_031468	ENSG00000183166	CALN1	CABP8	calneuron 1	protein-coding
siCtrl_G9a_GST_peak_2806	chr16	19940286	19940469	+	110	NA	Intergenic	Intergenic	-43421	NM_001304771	51704	Hs.148685	NM_016235	ENSG00000167191	GPRC5B	RAIG-2|RAIG2	G protein-coupled receptor class C group 5 member B	protein-coding
siCtrl_G9a_GST_peak_3426	chr19	42695531	42695592	+	110	NA	Intergenic	LTR33|LTR|ERVL	26268	NM_001270615	162989	Hs.515432	NM_133328	ENSG00000160570	DEDD2	FLAME-3|FLAME3	death effector domain containing 2	protein-coding
siCtrl_G9a_GST_peak_6346	chr7	70039944	70040150	+	110	NA	intron (NM_015570, intron 5 of 18)	intron (NM_015570, intron 5 of 18)	-557083	NM_022479	64409	Hs.488591	NM_022479	ENSG00000185274	GALNT17	GALNACT17|GALNT16|GALNT20|GALNTL3|GalNAc-T17|GalNAc-T19|GalNAc-T5L|WBSCR17	polypeptide N-acetylgalactosaminyltransferase 17	protein-coding
siCtrl_G9a_GST_peak_3066	chr17	53253449	53253510	+	110	NA	Intergenic	L2c|LINE|L2	-88842	NM_002126	3131	Hs.196952	NM_002126	ENSG00000108924	HLF	-	HLF transcription factor, PAR bZIP family member	protein-coding
siCtrl_G9a_GST_peak_1658	chr12	27156680	27156814	+	109	NA	intron (NM_016551, intron 1 of 11)	intron (NM_016551, intron 1 of 11)	10570	NM_016551	51768	Hs.438641	NM_016551	ENSG00000064115	TM7SF3	-	transmembrane 7 superfamily member 3	protein-coding
siCtrl_G9a_GST_peak_7066	chr9	98850242	98850363	+	109	NA	intron (NR_033838, intron 1 of 8)	intron (NR_033838, intron 1 of 8)	22181	NR_033838	158435	Hs.652615	NR_033838		LOC158435	-	uncharacterized LOC158435	ncRNA
siCtrl_G9a_GST_peak_6204	chr7	33820823	33820932	+	109	NA	Intergenic	Intergenic	-123650	NM_133468	168667	Hs.660998	NM_133468	ENSG00000164619	BMPER	CRIM3|CV-2|CV2	BMP binding endothelial regulator	protein-coding
siCtrl_G9a_GST_peak_1659	chr12	27156890	27157096	+	109	NA	intron (NM_016551, intron 1 of 11)	intron (NM_016551, intron 1 of 11)	10324	NM_016551	51768	Hs.438641	NM_016551	ENSG00000064115	TM7SF3	-	transmembrane 7 superfamily member 3	protein-coding
siCtrl_G9a_GST_peak_4877	chr3	194479659	194479805	+	109	NA	intron (NR_037891, intron 3 of 3)	intron (NR_037891, intron 3 of 3)	9706	NR_146990	105374293		NR_146990	ENSG00000230401	LINC01972	-	long intergenic non-protein coding RNA 1972	ncRNA
siCtrl_G9a_GST_peak_3037	chr17	49878383	49878699	+	109	NA	intron (NM_001082533, intron 4 of 9)	intron (NM_001082533, intron 4 of 9)	357533	NM_020178	56934	Hs.463466	NM_020178	ENSG00000154975	CA10	CA-RPX|CARPX|HUCEP-15	carbonic anhydrase 10	protein-coding
siCtrl_G9a_GST_peak_5203	chr5	17519749	17519812	+	109	NA	Intergenic	Intergenic	75661	NR_134271	102723526		NR_134270	ENSG00000249662	LINC02218	-	long intergenic non-protein coding RNA 2218	ncRNA
siCtrl_G9a_GST_peak_4772	chr3	123093137	123093214	+	109	NA	intron (NM_183357, intron 1 of 20)	intron (NM_183357, intron 1 of 20)	42014	NM_001199642	111	Hs.593292	NM_183357	ENSG00000173175	ADCY5	AC5|FDFM	adenylate cyclase 5	protein-coding
siCtrl_G9a_GST_peak_1589	chr12	6356001	6356323	+	109	NA	Intergenic	Intergenic	46596	NM_001769	928	Hs.114286	NM_001769	ENSG00000010278	CD9	BTCC-1|DRAP-27|MIC3|MRP-1|TSPAN-29|TSPAN29	CD9 molecule	protein-coding
siCtrl_G9a_GST_peak_3015	chr17	45234289	45234363	+	108	NA	non-coding (NR_148340, exon 5 of 17)	non-coding (NR_148340, exon 5 of 17)	32335	NR_148340	996	Hs.463295	NM_001256	ENSG00000004897	CDC27	ANAPC3|APC3|CDC27Hs|D0S1430E|D17S978E|H-NUC|HNUC|NUC2	cell division cycle 27	protein-coding
siCtrl_G9a_GST_peak_5008	chr4	57013253	57013317	+	108	NA	Intergenic	LTR38|LTR|ERV1	-23076	NM_020722	57482	Hs.596667	NM_020722	ENSG00000109265	KIAA1211	CRAD	KIAA1211	protein-coding
siCtrl_G9a_GST_peak_1248	chr10	97889959	97890107	+	108	NA	promoter-TSS (NM_001330738)	promoter-TSS (NM_001330738)	-4	NM_001330733	9849	Hs.600823	NM_014803	ENSG00000177853	ZNF518A	ZNF518	zinc finger protein 518A	protein-coding
siCtrl_G9a_GST_peak_2450	chr15	32462062	32462141	+	108	NA	non-coding (NR_046324, exon 8 of 8)	non-coding (NR_046324, exon 8 of 8)	139383	NM_001190455	1139	Hs.511772	NM_000746	ENSG00000175344	CHRNA7	CHRNA7-2|NACHRA7	cholinergic receptor nicotinic alpha 7 subunit	protein-coding
siCtrl_G9a_GST_peak_1837	chr12	68513661	68513728	+	108	NA	Intergenic	Intergenic	39826	NM_000619	3458	Hs.856	NM_000619	ENSG00000111537	IFNG	IFG|IFI	interferon gamma	protein-coding
siCtrl_G9a_GST_peak_2051	chr12	119510466	119510533	+	108	NA	intron (NM_194286, intron 1 of 12)	intron (NM_194286, intron 1 of 12)	91153	NM_194286	84530	Hs.744964	NM_194286	ENSG00000139767	SRRM4	KIAA1853|MU-MB-2.76|nSR100	serine/arginine repetitive matrix 4	protein-coding
siCtrl_G9a_GST_peak_996	chr1	232662243	232662325	+	108	NA	Intergenic	MER1B|DNA|hAT-Charlie	-10930	NM_020808	57568	Hs.745009	NM_020808	ENSG00000116991	SIPA1L2	SPAL2|SPAR2	signal induced proliferation associated 1 like 2	protein-coding
siCtrl_G9a_GST_peak_6905	chr9	16266770	16266884	+	108	NA	intron (NM_001364979, intron 1 of 3)	intron (NM_001364979, intron 1 of 3)	9484	NM_001364979	100129385	Hs.586441	NM_001271829	ENSG00000205549	C9orf92	Em:AL513424.1	chromosome 9 open reading frame 92	protein-coding
siCtrl_G9a_GST_peak_3644	chr2	42166699	42167342	+	108	NA	intron (NR_161189, intron 3 of 3)	MIRb|SINE|MIR	-6157	NR_110262	101929723	Hs.369330	NR_110262	ENSG00000234362	LINC01914	-	long intergenic non-protein coding RNA 1914	ncRNA
siCtrl_G9a_GST_peak_3144	chr17	59237800	59237891	+	108	NA	intron (NM_001353146, intron 23 of 25)	intron (NM_001353146, intron 23 of 25)	207220	NR_136397	101927855	Hs.662123	NR_136397	ENSG00000267131	LOC101927855	-	uncharacterized LOC101927855	ncRNA
siCtrl_G9a_GST_peak_3921	chr2	108145881	108145954	+	108	NA	promoter-TSS (NR_146968)	promoter-TSS (NR_146968)	42	NR_146968	105373537		NR_146968	ENSG00000224568	LINC01886	-	long intergenic non-protein coding RNA 1886	ncRNA
siCtrl_G9a_GST_peak_2556	chr15	58061688	58061885	+	108	NA	Intergenic	Intergenic	62874	NM_015532	81488	Hs.437256	NM_015532	ENSG00000255529	POLR2M	GCOM1|GRINL1A|Gdown|Gdown1	RNA polymerase II subunit M	protein-coding
siCtrl_G9a_GST_peak_1973	chr12	101632797	101632959	+	108	NA	Intergenic	MER52C|LTR|ERV1	-28862	NM_145913	160728	Hs.444536	NM_145913	ENSG00000256870	SLC5A8	AIT|SMCT|SMCT1	solute carrier family 5 member 8	protein-coding
siCtrl_G9a_GST_peak_984	chr1	232172362	232172721	+	108	NA	exon (NM_001164540, exon 11 of 11)	exon (NM_001164540, exon 11 of 11)	110961	NR_126441	104472714		NR_126441	ENSG00000226758	DISC1-IT1	-	DISC1 intronic transcript 1	ncRNA
siCtrl_G9a_GST_peak_3606	chr2	38318781	38318966	+	108	NA	Intergenic	MIR|SINE|MIR	-15550	NM_000104	1545	Hs.154654	NM_000104	ENSG00000138061	CYP1B1	ASGD6|CP1B|CYPIB1|GLC3A|P4501B1	cytochrome P450 family 1 subfamily B member 1	protein-coding
siCtrl_G9a_GST_peak_5964	chr6	136682705	136682822	+	108	NA	intron (NM_001198614, intron 12 of 18)	intron (NM_001198614, intron 12 of 18)	-71774	NM_001077440	9774	Hs.486542	NM_014739	ENSG00000029363	BCLAF1	BTF|bK211L9.1	BCL2 associated transcription factor 1	protein-coding
siCtrl_G9a_GST_peak_1523	chr11	113368501	113368749	+	108	NA	Intergenic	MLT1F1|LTR|ERVL-MaLR	-22505	NM_000795	1813	Hs.73893	NM_000795	ENSG00000149295	DRD2	D2DR|D2R	dopamine receptor D2	protein-coding
siCtrl_G9a_GST_peak_2860	chr16	54746247	54746396	+	108	NA	Intergenic	Intergenic	135824	NR_134971	101927480	Hs.499208	NR_134971	ENSG00000245694	LOC101927480	-	uncharacterized LOC101927480	ncRNA
siCtrl_G9a_GST_peak_157	chr1	61400691	61400910	+	108	NA	Intergenic	Intergenic	35648	NR_110617	100996570	Hs.46616	NR_110617	ENSG00000237928	NFIA-AS2	-	NFIA antisense RNA 2	ncRNA
siCtrl_G9a_GST_peak_886	chr1	218691107	218691187	+	108	NA	intron (NR_146760, intron 1 of 2)	intron (NR_146760, intron 1 of 2)	7710	NR_146760	440714	Hs.146774	NR_146760	ENSG00000228208	C1orf143	-	chromosome 1 open reading frame 143 (putative)	ncRNA
siCtrl_G9a_GST_peak_43	chr1	53585411	53585487	+	108	NA	intron (NM_001287595, intron 2 of 10)	L3|LINE|CR1	22861	NM_001287595	6512	Hs.104637	NM_006671	ENSG00000162383	SLC1A7	AAAT|EAAT5	solute carrier family 1 member 7	protein-coding
siCtrl_G9a_GST_peak_6936	chr9	38117839	38117913	+	107	NA	Intergenic	Intergenic	-48652	NM_003028	6461	Hs.521482	NM_003028	ENSG00000107338	SHB	bA3J10.2	SH2 domain containing adaptor protein B	protein-coding
siCtrl_G9a_GST_peak_3584	chr2	30031152	30031611	+	107	NA	intron (NM_004304, intron 1 of 28)	intron (NM_004304, intron 1 of 28)	113071	NM_004304	238	Hs.654469	NM_004304	ENSG00000171094	ALK	CD246|NBLST3	ALK receptor tyrosine kinase	protein-coding
siCtrl_G9a_GST_peak_4859	chr3	177447817	177447960	+	107	NA	intron (NR_047568, intron 3 of 3)	intron (NR_047568, intron 3 of 3)	-86765	NR_110826	102724550	Hs.570526	NR_110826	ENSG00000231574	LINC02015	KCCAT211	long intergenic non-protein coding RNA 2015	ncRNA
siCtrl_G9a_GST_peak_1921	chr12	92691329	92691499	+	107	NA	Intergenic	Intergenic	-123893	NR_027932	574028	Hs.730377	NM_001025233	ENSG00000257127	CLLU1	-	chronic lymphocytic leukemia up-regulated 1	ncRNA
siCtrl_G9a_GST_peak_2945	chr17	19015742	19015821	+	107	NA	TTS (NR_006882)	TTS (NR_006882)	168	NR_006882	780854		NR_006882	ENSG00000281000	SNORD3D	RNU3-4|U3-4	small nucleolar RNA, C/D box 3D	snoRNA
siCtrl_G9a_GST_peak_1485	chr11	79667057	79667211	+	107	NA	Intergenic	Intergenic	-515060	NM_001098816	26011	Hs.213087	NM_001098816	ENSG00000149256	TENM4	Doc4|ETM5|ODZ4|TNM4|Ten-M4|ten-4	teneurin transmembrane protein 4	protein-coding
siCtrl_G9a_GST_peak_3902	chr2	102112226	102112290	+	107	NA	Intergenic	AluSc|SINE|Alu	-20684	NM_001367509	731220	Hs.662488	NM_207403	ENSG00000196460	RFX8	-	RFX family member 8, lacking RFX DNA binding domain	protein-coding
siCtrl_G9a_GST_peak_6159	chr7	28613614	28613792	+	107	NA	intron (NM_182898, intron 5 of 10)	intron (NM_182898, intron 5 of 10)	-112047	NM_001011666	9586	Hs.437075	NM_004904	ENSG00000146592	CREB5	CRE-BPA|CREB-5|CREBPA	cAMP responsive element binding protein 5	protein-coding
siCtrl_G9a_GST_peak_1928	chr12	93455202	93455510	+	107	NA	intron (NR_040096, intron 3 of 4)	intron (NR_040096, intron 3 of 4)	-112786	NR_120492	102724933	Hs.663947	NR_120492	ENSG00000258171	LINC02412	-	long intergenic non-protein coding RNA 2412	ncRNA
siCtrl_G9a_GST_peak_6481	chr7	134945911	134945995	+	107	NA	Intergenic	Intergenic	29222	NM_182489	346673	Hs.592279	NM_182489	ENSG00000146857	STRA8	-	stimulated by retinoic acid 8	protein-coding
siCtrl_G9a_GST_peak_6707	chr8	73388128	73388191	+	107	NA	Intergenic	Intergenic	-61301	NM_004770	9312	Hs.661102	NM_004770	ENSG00000182674	KCNB2	KV2.2	potassium voltage-gated channel subfamily B member 2	protein-coding
siCtrl_G9a_GST_peak_401	chr1	108775230	108775383	+	107	NA	intron (NM_001143989, intron 11 of 14)	intron (NM_001143989, intron 11 of 14)	11397	NM_001143989	148545	Hs.511849	NM_152488	ENSG00000196427	NBPF4	-	NBPF member 4	protein-coding
siCtrl_G9a_GST_peak_1445	chr11	70330336	70330441	+	107	NA	intron (NR_110766, intron 8 of 8)	MSTA|LTR|ERVL-MaLR	85753	NM_005231	2017	Hs.596164	NM_005231	ENSG00000085733	CTTN	EMS1	cortactin	protein-coding
siCtrl_G9a_GST_peak_55	chr1	54220474	54220761	+	107	NA	Intergenic	Intergenic	-15780	NM_001367484	148979	Hs.306691	NM_147193	ENSG00000174332	GLIS1	-	GLIS family zinc finger 1	protein-coding
siCtrl_G9a_GST_peak_4406	chr21	9999577	9999668	+	107	NA	Intergenic	LTR16A|LTR|ERVL	-31028	NR_038328	100132288	Hs.487562	NM_174948	ENSG00000188681	TEKT4P2	MAFIPL|TEKT4P	tektin 4 pseudogene 2	pseudo
siCtrl_G9a_GST_peak_606	chr1	162602987	162603267	+	107	NA	intron (NM_001014796, intron 1 of 18)	intron (NM_001014796, intron 1 of 18)	873	NM_001014796	4921	Hs.275757	NM_006182	ENSG00000162733	DDR2	MIG20a|NTRKR3|TKT|TYRO10|WRCN	discoidin domain receptor tyrosine kinase 2	protein-coding
siCtrl_G9a_GST_peak_3831	chr2	75548012	75548241	+	107	NA	Intergenic	Intergenic	-121480	NM_015727	6869	Hs.633301	NM_001058	ENSG00000115353	TACR1	NK1R|NKIR|SPR|TAC1R	tachykinin receptor 1	protein-coding
siCtrl_G9a_GST_peak_1883	chr12	77321073	77321180	+	107	NA	Intergenic	Intergenic	-48327	NM_001321	1466	Hs.530904	NM_001321	ENSG00000175183	CSRP2	CRP2|LMO5|SmLIM	cysteine and glycine rich protein 2	protein-coding
siCtrl_G9a_GST_peak_3586	chr2	30231440	30231567	+	107	NA	Intergenic	Intergenic	-87051	NM_004304	238	Hs.654469	NM_004304	ENSG00000171094	ALK	CD246|NBLST3	ALK receptor tyrosine kinase	protein-coding
siCtrl_G9a_GST_peak_6002	chr6	146971999	146972405	+	107	NA	intron (NM_024694, intron 3 of 35)	LTR38-int|LTR|ERV1	52094	NM_024694	79747	Hs.720870	NM_024694	ENSG00000118492	ADGB	C6orf103|CAPN16	androglobin	protein-coding
siCtrl_G9a_GST_peak_2630	chr15	71981293	71981352	+	107	NA	non-coding (NR_120346, exon 3 of 3)	non-coding (NR_120346, exon 3 of 3)	2556	NR_120346	101929173	Hs.680593	NR_120346		THSD4-AS2	-	THSD4 antisense RNA 2	ncRNA
siCtrl_G9a_GST_peak_5308	chr5	73653843	73653995	+	107	NA	Intergenic	LTR53|LTR|ERVL	35608	NR_105010	101929082	Hs.434316	NR_105010	ENSG00000249343	LINC01333	-	long intergenic non-protein coding RNA 1333	ncRNA
siCtrl_G9a_GST_peak_1170	chr10	65689703	65690155	+	107	NA	Intergenic	Intergenic	-408279	NM_001318154	221037	Hs.413416	NM_004241	ENSG00000171988	JMJD1C	KDM3C|TRIP-8|TRIP8	jumonji domain containing 1C	protein-coding
siCtrl_G9a_GST_peak_3205	chr17	69945036	69945121	+	107	NA	Intergenic	ERV3-16A3_I-int|LTR|ERVL	77042	NR_110876	102723505	Hs.547482	NR_110876		ROCR	LINC02095	regulator of chondrogenesis RNA	ncRNA
siCtrl_G9a_GST_peak_233	chr1	75036697	75036980	+	107	NA	exon (NM_001002912, exon 14 of 15)	exon (NM_001002912, exon 14 of 15)	-6276	NR_121671	101927320	Hs.662589	NR_121670	ENSG00000234497	ERICH3-AS1	-	ERICH3 antisense RNA 1	ncRNA
siCtrl_G9a_GST_peak_3788	chr2	68107241	68107620	+	107	NA	Intergenic	Intergenic	-54736	NR_110271	101927701	Hs.348697	NR_110271	ENSG00000237013	LINC01812	-	long intergenic non-protein coding RNA 1812	ncRNA
siCtrl_G9a_GST_peak_3164	chr17	63181057	63181175	+	107	NA	intron (NM_003835, intron 9 of 18)	AluJo|SINE|Alu	47628	NM_003835	8787	Hs.664380	NM_003835	ENSG00000108370	RGS9	PERRS|RGS9L	regulator of G protein signaling 9	protein-coding
siCtrl_G9a_GST_peak_3402	chr19	9517669	9517786	+	107	NA	Intergenic	CpG	28522	NM_001370380	10781	Hs.656185	NM_006631	ENSG00000174652	ZNF266	HZF1	zinc finger protein 266	protein-coding
siCtrl_G9a_GST_peak_65	chr1	55985586	55985919	+	107	NA	Intergenic	Intergenic	294438	NR_039618	100616272		NR_039618	ENSG00000265822	MIR4422	mir-4422	microRNA 4422	ncRNA
siCtrl_G9a_GST_peak_6916	chr9	19650259	19650663	+	107	NA	intron (NM_020344, intron 1 of 9)	intron (NM_020344, intron 1 of 9)	136556	NM_001193288	25769	Hs.283014	NM_020344	ENSG00000155886	SLC24A2	NCKX2	solute carrier family 24 member 2	protein-coding
siCtrl_G9a_GST_peak_3562	chr2	29485587	29486046	+	107	NA	intron (NM_004304, intron 11 of 28)	intron (NM_004304, intron 11 of 28)	-39050	NM_001353765	238	Hs.654469	NM_004304	ENSG00000171094	ALK	CD246|NBLST3	ALK receptor tyrosine kinase	protein-coding
siCtrl_G9a_GST_peak_4357	chr20	49770760	49771059	+	107	NA	Intergenic	Intergenic	-131265	NM_002237	3755	Hs.118695	NM_002237	ENSG00000026559	KCNG1	K13|KCNG|KV6.1|kH2	potassium voltage-gated channel modifier subfamily G member 1	protein-coding
siCtrl_G9a_GST_peak_6763	chr8	95239420	95239492	+	107	NA	Intergenic	Intergenic	-9950	NM_001144663	1015	Hs.591853	NM_004063	ENSG00000079112	CDH17	CDH16|HPT-1|HPT1	cadherin 17	protein-coding
siCtrl_G9a_GST_peak_826	chr1	210799184	210799391	+	107	NA	intron (NM_018194, intron 11 of 11)	MLT1I|LTR|ERVL-MaLR	296577	NM_001170580	55733	Hs.58650	NM_018194	ENSG00000054392	HHAT	MART2|SKI1|Skn	hedgehog acyltransferase	protein-coding
siCtrl_G9a_GST_peak_574	chr1	146360411	146360632	+	107	NA	intron (NM_001351365, intron 73 of 94)	MLT1H1|LTR|ERVL-MaLR	-13336	NM_001278141	149013	Hs.666981	NM_001278141	ENSG00000268043	NBPF12	COAS1|KIAA1245	NBPF member 12	protein-coding
siCtrl_G9a_GST_peak_6319	chr7	68010111	68010441	+	107	NA	Intergenic	Intergenic	525036	NR_120514	102723427	Hs.583491	NR_120514	ENSG00000225209	LOC102723427	-	uncharacterized LOC102723427	ncRNA
siCtrl_G9a_GST_peak_3646	chr2	43548747	43548875	+	107	NA	intron (NR_144316, intron 29 of 36)	intron (NR_144316, intron 29 of 36)	94461	NR_027251	100129726	Hs.194480	NM_178529	ENSG00000279873	LINC01126	-	long intergenic non-protein coding RNA 1126	ncRNA
siCtrl_G9a_GST_peak_6321	chr7	68326221	68326328	+	107	NA	Intergenic	Intergenic	736336	NR_148926	100507468	Hs.362492	NR_108105		CT66	-	cancer/testis associated transcript 66	ncRNA
siCtrl_G9a_GST_peak_6955	chr9	66472460	66472519	+	107	NA	Intergenic	L1M1|LINE|L1	15200	NR_121647	103352539	Hs.351215	NR_121647	ENSG00000238113	LINC01410	-	long intergenic non-protein coding RNA 1410	ncRNA
siCtrl_G9a_GST_peak_2324	chr14	36790113	36790405	+	107	NA	promoter-TSS (NM_001308110)	promoter-TSS (NM_001308110)	-377	NM_001144891	51562	Hs.368647	NM_016586	ENSG00000151332	MBIP	-	MAP3K12 binding inhibitory protein 1	protein-coding
siCtrl_G9a_GST_peak_2477	chr15	45371421	45371720	+	107	NA	Intergenic	MSTB2|LTR|ERVL-MaLR	34789	NM_014080	50506	Hs.71377	NM_014080	ENSG00000140279	DUOX2	LNOX2|NOXEF2|P138-TOX|TDH6|THOX2	dual oxidase 2	protein-coding
siCtrl_G9a_GST_peak_5030	chr4	80086103	80086179	+	107	NA	intron (NR_038342, intron 3 of 5)	intron (NR_038342, intron 3 of 5)	161074	NM_032693	84779	Hs.676048	NM_032693	ENSG00000156269	NAA11	ARD1B|ARD2|hARD2	N(alpha)-acetyltransferase 11, NatA catalytic subunit	protein-coding
siCtrl_G9a_GST_peak_156	chr1	61383155	61383502	+	107	NA	Intergenic	MLT1B|LTR|ERVL-MaLR	53120	NR_110617	100996570	Hs.46616	NR_110617	ENSG00000237928	NFIA-AS2	-	NFIA antisense RNA 2	ncRNA
siCtrl_G9a_GST_peak_109	chr1	58907268	58907718	+	106	NA	Intergenic	Intergenic	104905	NM_145243	115209	Hs.425769	NM_145243	ENSG00000162600	OMA1	2010001O09Rik|DAB1|MPRP-1|MPRP1|YKR087C|ZMPOMA1|peptidase	OMA1 zinc metallopeptidase	protein-coding
siCtrl_G9a_GST_peak_2312	chr14	23235695	23235915	+	106	NA	promoter-TSS (NM_005015)	promoter-TSS (NM_005015)	-92	NM_005015	5018	Hs.151134	NM_005015	ENSG00000155463	OXA1L	OXA1	OXA1L mitochondrial inner membrane protein	protein-coding
siCtrl_G9a_GST_peak_4184	chr2	231870000	231870103	+	106	NA	intron (NM_139073, intron 4 of 4)	HAL1-2a_MD|LINE|L1	9212	NM_139073	130560	Hs.745178	NM_139073	ENSG00000173699	SPATA3	TSARG1	spermatogenesis associated 3	protein-coding
siCtrl_G9a_GST_peak_6855	chr8	139755186	139755879	+	106	NA	intron (NM_152888, intron 22 of 64)	HAL1-2a_MD|LINE|L1	170752	NM_152888	169044	Hs.117169	NM_152888	ENSG00000169436	COL22A1	-	collagen type XXII alpha 1 chain	protein-coding
siCtrl_G9a_GST_peak_3632	chr2	39923310	39923544	+	106	NA	intron (NM_152390, intron 1 of 3)	intron (NM_152390, intron 1 of 3)	30370	NM_152390	130733	Hs.40808	NM_152390	ENSG00000152154	TMEM178A	TMEM178	transmembrane protein 178A	protein-coding
siCtrl_G9a_GST_peak_240	chr1	76521491	76521563	+	106	NA	Intergenic	MLT1G1|LTR|ERVL-MaLR	-18904	NM_152996	256435	Hs.337040	NM_152996	ENSG00000184005	ST6GALNAC3	PRO7177|SIAT7C|ST6GALNACIII|STY	ST6 N-acetylgalactosaminide alpha-2,6-sialyltransferase 3	protein-coding
siCtrl_G9a_GST_peak_280	chr1	86952907	86953319	+	106	NA	intron (NM_001285, intron 7 of 13)	intron (NM_001285, intron 7 of 13)	18503	NM_001285	1179	Hs.194659	NM_001285	ENSG00000016490	CLCA1	CACC|CACC1|CLCRG1|CaCC-1|GOB5|hCLCA1|hCaCC-1	chloride channel accessory 1	protein-coding
siCtrl_G9a_GST_peak_3671	chr2	45568226	45568564	+	106	NA	Intergenic	MIRc|SINE|MIR	-86315	NR_033831	400952	Hs.468368	NR_033831	ENSG00000205054	LINC01121	UNQ6975	long intergenic non-protein coding RNA 1121	ncRNA
siCtrl_G9a_GST_peak_2053	chr12	119726460	119726550	+	106	NA	intron (NR_024246, intron 2 of 3)	intron (NR_024246, intron 2 of 3)	14680	NR_024246	144742	Hs.524782	NR_024246	ENSG00000281196	LINC00934	-	long intergenic non-protein coding RNA 934	ncRNA
siCtrl_G9a_GST_peak_1430	chr11	61313036	61313122	+	106	NA	intron (NM_001365809, intron 5 of 12)	intron (NM_001365809, intron 5 of 12)	-2731	NM_001370210	9066	Hs.131188	NM_004200	ENSG00000011347	SYT7	IPCA-7|IPCA7|PCANAP7|SYT-VII|SYTVII	synaptotagmin 7	protein-coding
siCtrl_G9a_GST_peak_2764	chr15	101371588	101372452	+	106	NA	Intergenic	Intergenic	-17937	NR_160702	105369201	Hs.612155	NR_160702	ENSG00000272808	LOC105369201	-	uncharacterized LOC105369201	ncRNA
siCtrl_G9a_GST_peak_1574	chr12	2389769	2389922	+	106	NA	intron (NR_046769, intron 1 of 2)	intron (NR_046769, intron 1 of 2)	10903	NR_046769	100874370	Hs.653548	NR_046769		CACNA1C-IT3	-	CACNA1C intronic transcript 3	ncRNA
siCtrl_G9a_GST_peak_2948	chr17	20946984	20947062	+	106	NA	promoter-TSS (NM_015276)	promoter-TSS (NM_015276)	-699	NM_015276	23326	Hs.462492	NM_015276	ENSG00000124422	USP22	USP3L	ubiquitin specific peptidase 22	protein-coding
siCtrl_G9a_GST_peak_2770	chr16	2918155	2918294	+	106	NA	Intergenic	CpG	-10053	NM_022119	64063	Hs.459709	NM_022119	ENSG00000005001	PRSS22	BSSP-4|SP001LA|hBSSP-4	serine protease 22	protein-coding
siCtrl_G9a_GST_peak_3808	chr2	71228289	71228438	+	106	NA	Intergenic	Intergenic	-6360	NM_144582	113419	Hs.516087	NM_144582	ENSG00000144043	TEX261	TEG-261	testis expressed 261	protein-coding
siCtrl_G9a_GST_peak_6692	chr8	61955551	61956096	+	106	NA	Intergenic	ERV3-16A3_I-int|LTR|ERVL	-75516	NR_034003	100130298	Hs.636194	NR_034003		LOC100130298	-	hCG1816373-like	ncRNA
siCtrl_G9a_GST_peak_3145	chr17	59238115	59238195	+	106	NA	intron (NM_001353146, intron 23 of 25)	intron (NM_001353146, intron 23 of 25)	206910	NR_136397	101927855	Hs.662123	NR_136397	ENSG00000267131	LOC101927855	-	uncharacterized LOC101927855	ncRNA
siCtrl_G9a_GST_peak_3239	chr17	72143863	72144175	+	106	NA	Intergenic	Intergenic	-55798	NM_000999	6169	Hs.380953	NM_000999	ENSG00000172809	RPL38	L38	ribosomal protein L38	protein-coding
siCtrl_G9a_GST_peak_3151	chr17	59402939	59403215	+	106	NA	intron (NM_001353146, intron 23 of 25)	intron (NM_001353146, intron 23 of 25)	41988	NR_136397	101927855	Hs.662123	NR_136397	ENSG00000267131	LOC101927855	-	uncharacterized LOC101927855	ncRNA
siCtrl_G9a_GST_peak_2398	chr14	89452527	89453148	+	106	NA	Intergenic	Intergenic	161842	NR_159362	123016	Hs.303055	NM_144596	ENSG00000165533	TTC8	BBS8|RP51	tetratricopeptide repeat domain 8	protein-coding
siCtrl_G9a_GST_peak_1978	chr12	103534182	103534283	+	106	NA	Intergenic	Intergenic	-11388	NR_126333	101929058	Hs.171310	NR_126333	ENSG00000257860	LOC101929058	-	uncharacterized LOC101929058	ncRNA
siCtrl_G9a_GST_peak_3602	chr2	37875638	37875727	+	106	NA	intron (NM_001270436, intron 1 of 1)	intron (NM_001270436, intron 1 of 1)	23660	NM_006449	10602	Hs.369574	NM_006449	ENSG00000163171	CDC42EP3	BORG2|CEP3|UB1	CDC42 effector protein 3	protein-coding
siCtrl_G9a_GST_peak_6973	chr9	68695732	68695865	+	106	NA	Intergenic	Intergenic	-30667	NR_034006	100132352	Hs.231861	NR_034006		FRG1HP	-	FSHD region gene 1 family member H, pseudogene	pseudo
siCtrl_G9a_GST_peak_3024	chr17	47860311	47860691	+	106	NA	Intergenic	Intergenic	-5542	NM_001346706	11143	Hs.21907	NM_007067	ENSG00000136504	KAT7	HBO1|HBOA|MYST2|ZC2HC7	lysine acetyltransferase 7	protein-coding
siCtrl_G9a_GST_peak_452	chr1	117190997	117191472	+	106	NA	intron (NM_001542, intron 2 of 11)	intron (NM_001542, intron 2 of 11)	19121	NM_001007237	3321	Hs.171057	NM_001542	ENSG00000143061	IGSF3	EWI-3|LCDD|V8	immunoglobulin superfamily member 3	protein-coding
siCtrl_G9a_GST_peak_5786	chr6	91865213	91865406	+	105	NA	Intergenic	Intergenic	-366069	NR_039786	100616174		NR_039786	ENSG00000263734	MIR4643	-	microRNA 4643	ncRNA
siCtrl_G9a_GST_peak_5961	chr6	136123531	136123627	+	105	NA	Intergenic	ERVL-E-int|LTR|ERVL	-49260	NM_018945	27115	Hs.744230	NM_018945	ENSG00000171408	PDE7B	bA472E5.1	phosphodiesterase 7B	protein-coding
siCtrl_G9a_GST_peak_6156	chr7	28355694	28355759	+	105	NA	intron (NM_182899, intron 1 of 9)	intron (NM_182899, intron 1 of 9)	16786	NM_182899	9586	Hs.437075	NM_004904	ENSG00000146592	CREB5	CRE-BPA|CREB-5|CREBPA	cAMP responsive element binding protein 5	protein-coding
siCtrl_G9a_GST_peak_6827	chr8	127103183	127103268	+	105	NA	Intergenic	MLT1H|LTR|ERVL-MaLR	-139784	NR_038446	100130231	Hs.729642	NR_038446	ENSG00000245164	LINC00861	-	long intergenic non-protein coding RNA 861	ncRNA
siCtrl_G9a_GST_peak_1765	chr12	59301908	59302055	+	105	NA	intron (NM_153377, intron 3 of 18)	MamRep137|DNA|TcMar?	11346	NM_001136051	121227	Hs.253736	NM_153377	ENSG00000139263	LRIG3	LIG3	leucine rich repeats and immunoglobulin like domains 3	protein-coding
siCtrl_G9a_GST_peak_775	chr1	208520530	208520786	+	105	NA	Intergenic	Plat_L3|LINE|CR1	-102929	NM_025179	5362	Hs.497626	NM_025179	ENSG00000076356	PLXNA2	OCT|PLXN2	plexin A2	protein-coding
siCtrl_G9a_GST_peak_6613	chr8	29756534	29756984	+	105	NA	Intergenic	Intergenic	-22270	NR_024473	286135	Hs.376840	NR_024473	ENSG00000253279	LINC02209	FAM183CP	long intergenic non-protein coding RNA 2209	ncRNA
siCtrl_G9a_GST_peak_5683	chr6	51417234	51417331	+	105	NA	Intergenic	Intergenic	-69386	NR_125840	101927082	Hs.730296	NR_125840		LOC101927082	-	uncharacterized LOC101927082	ncRNA
siCtrl_G9a_GST_peak_3990	chr2	150828439	150828774	+	105	NA	Intergenic	Intergenic	-112901	NR_145421	150596	Hs.470217	NM_153041	ENSG00000162947	LINC01931	-	long intergenic non-protein coding RNA 1931	ncRNA
siCtrl_G9a_GST_peak_3050	chr17	52272588	52272659	+	105	NA	Intergenic	Intergenic	372335	NM_032559	84643	Hs.226805	NM_032559	ENSG00000141200	KIF2B	-	kinesin family member 2B	protein-coding
siCtrl_G9a_GST_peak_2343	chr14	53822712	53822772	+	105	NA	Intergenic	Intergenic	202670	NR_110062	101927620		NR_110062	ENSG00000258731	LOC101927620	-	uncharacterized LOC101927620	ncRNA
siCtrl_G9a_GST_peak_1233	chr10	90575535	90575715	+	105	NA	intron (NM_001128215, intron 6 of 8)	intron (NM_001128215, intron 6 of 8)	13138	NM_001128215	340654	Hs.55118	NM_001128215	ENSG00000173239	LIPM	LIPL3|bA304I5.1	lipase family member M	protein-coding
siCtrl_G9a_GST_peak_3342	chr18	48278061	48278168	+	105	NA	Intergenic	Intergenic	68272	NM_001127175	83876	Hs.30495	NM_031939	ENSG00000134042	MRO	B29|C18orf3	maestro	protein-coding
siCtrl_G9a_GST_peak_3809	chr2	73613937	73614385	+	105	NA	intron (NM_015120, intron 1 of 22)	MER3|DNA|hAT-Charlie	1275	NM_015120	7840	Hs.184720	NM_015120	ENSG00000116127	ALMS1	ALSS	ALMS1 centrosome and basal body associated protein	protein-coding
siCtrl_G9a_GST_peak_1388	chr11	23612322	23612499	+	105	NA	Intergenic	Intergenic	-171674	NR_107021	102465860		NR_107021	ENSG00000275868	MIR8054	hsa-mir-8054	microRNA 8054	ncRNA
siCtrl_G9a_GST_peak_904	chr1	219930477	219930576	+	105	NA	Intergenic	MSTA|LTR|ERVL-MaLR	-144039	NM_001355457	643136	Hs.647764	NM_001085394	ENSG00000215817	ZC3H11B	ZC3HDC11B	zinc finger CCCH-type containing 11B	protein-coding
siCtrl_G9a_GST_peak_2821	chr16	26992355	26992679	+	105	NA	Intergenic	Intergenic	-85731	NM_001145545	162083	Hs.120831	NM_182831		C16orf82	TNT	chromosome 16 open reading frame 82	protein-coding
siCtrl_G9a_GST_peak_185	chr1	64283364	64283499	+	105	NA	intron (NM_005012, intron 1 of 8)	intron (NM_005012, intron 1 of 8)	43743	NM_001083592	4919	Hs.128753	NM_005012	ENSG00000185483	ROR1	NTRKR1|dJ537F10.1	receptor tyrosine kinase like orphan receptor 1	protein-coding
siCtrl_G9a_GST_peak_4902	chr4	17060323	17060392	+	105	NA	Intergenic	Intergenic	127323	NR_125919	101929123	Hs.638913	NR_125919	ENSG00000250819	LINC02493	-	long intergenic non-protein coding RNA 2493	ncRNA
siCtrl_G9a_GST_peak_3514	chr2	17357816	17357876	+	105	NA	Intergenic	Intergenic	341861	NM_001099218	729475	Hs.515802	NM_001099218	ENSG00000214842	RAD51AP2	-	RAD51 associated protein 2	protein-coding
siCtrl_G9a_GST_peak_6197	chr7	32856286	32856529	+	105	NA	Intergenic	Intergenic	-9507	NR_132360	102724668	Hs.636806	NR_132360		DPY19L1P2	THC1072510	DPY19L1 pseudogene 2	pseudo
siCtrl_G9a_GST_peak_1105	chr10	31871353	31871528	+	105	NA	Intergenic	Intergenic	-182756	NM_001368169	100505502	Hs.730227	NM_001368169		LOC100505502	-	putative UPF0607 protein FLJ37424	protein-coding
siCtrl_G9a_GST_peak_30	chr1	42080040	42080106	+	105	NA	intron (NM_001127714, intron 2 of 7)	intron (NM_001127714, intron 2 of 7)	-129719	NR_126098	1907	Hs.1407	NM_001956	ENSG00000127129	EDN2	ET-2|ET2|PPET2	endothelin 2	protein-coding
siCtrl_G9a_GST_peak_1838	chr12	68513830	68514001	+	105	NA	Intergenic	Intergenic	39605	NM_000619	3458	Hs.856	NM_000619	ENSG00000111537	IFNG	IFG|IFI	interferon gamma	protein-coding
siCtrl_G9a_GST_peak_4169	chr2	223220874	223220939	+	105	NA	non-coding (NR_136642, exon 4 of 4)	non-coding (NR_136642, exon 4 of 4)	35526	NR_136641	440934	Hs.732732	NR_136638	ENSG00000237732	CT75	-	cancer/testis associated transcript 75	ncRNA
siCtrl_G9a_GST_peak_6415	chr7	111682760	111683050	+	105	NA	intron (NM_001363540, intron 1 of 52)	MSTB2|LTR|ERVL-MaLR	163549	NM_001363540	9732	Hs.654652	NM_014705	ENSG00000128512	DOCK4	-	dedicator of cytokinesis 4	protein-coding
siCtrl_G9a_GST_peak_6504	chr7	137013177	137013461	+	105	NA	intron (NM_001321387, intron 1 of 4)	intron (NM_001321387, intron 1 of 4)	15160	NM_002825	5764	Hs.371249	NM_002825	ENSG00000105894	PTN	HARP|HB-GAM|HBBM|HBGF-8|HBGF8|HBNF|HBNF-1|NEGF1|OSF-1	pleiotrophin	protein-coding
siCtrl_G9a_GST_peak_6908	chr9	17447103	17447494	+	105	NA	intron (NM_001365029, intron 18 of 25)	intron (NM_001365029, intron 18 of 25)	-131766	NM_003026	6456	Hs.75149	NM_003026	ENSG00000107295	SH3GL2	CNSA2|EEN-B1|SH3D2A|SH3P4	SH3 domain containing GRB2 like 2, endophilin A1	protein-coding
siCtrl_G9a_GST_peak_7125	chr9	120992633	120992819	+	105	NA	Intergenic	Intergenic	-449223	NR_151725	111216287		NR_151725		LINC02578	-	long intergenic non-protein coding RNA 2578	ncRNA
siCtrl_G9a_GST_peak_4585	chr3	16521315	16521387	+	105	NA	intron (NM_015150, intron 2 of 9)	intron (NM_015150, intron 2 of 9)	33855	NM_015150	23180	Hs.98910	NM_015150	ENSG00000131378	RFTN1	MIG2|PIB10|PIG9|RAFTLIN	raftlin, lipid raft linker 1	protein-coding
siCtrl_G9a_GST_peak_1651	chr12	26876234	26876616	+	105	NA	intron (NM_002223, intron 4 of 56)	L4|LINE|RTE	109702	NM_002223	3709	Hs.512235	NM_002223	ENSG00000123104	ITPR2	ANHD|CFAP48|INSP3R2|IP3R2	inositol 1,4,5-trisphosphate receptor type 2	protein-coding
siCtrl_G9a_GST_peak_4	chr1	244581	244739	+	105	NA	Intergenic	Intergenic	-79232	NR_028322	100132287	Hs.446409	NR_028322		LOC100132287	-	uncharacterized LOC100132287	ncRNA
siCtrl_G9a_GST_peak_1894	chr12	81086000	81086135	+	105	NA	Intergenic	Intergenic	-15346	NM_002469	4618	Hs.35937	NM_002469	ENSG00000111046	MYF6	CNM3|MRF4|bHLHc4|myf-6	myogenic factor 6	protein-coding
siCtrl_G9a_GST_peak_5723	chr6	68103457	68103599	+	105	NA	Intergenic	THE1B|LTR|ERVL-MaLR	-661715	NR_125869	102723883	Hs.566528	NR_125869	ENSG00000223504	LOC102723883	-	uncharacterized LOC102723883	ncRNA
siCtrl_G9a_GST_peak_5795	chr6	95996055	95996262	+	105	NA	Intergenic	LTR16A|LTR|ERVL	29169	NR_047502	101927288	Hs.616643	NR_047502	ENSG00000261366	MANEA-DT	MANEA-AS1	MANEA divergent transcript	ncRNA
siCtrl_G9a_GST_peak_4663	chr3	59807079	59807149	+	105	NA	intron (NM_001354589, intron 7 of 8)	intron (NM_001354589, intron 7 of 8)	-162891	NR_149028	339902	Hs.132446	NR_149028		LOC339902	-	hCG1813818	ncRNA
siCtrl_G9a_GST_peak_4701	chr3	72714997	72715320	+	105	NA	Intergenic	Intergenic	-1758	NR_135531	105377162	Hs.123457	NR_135531		LOC105377162	-	uncharacterized LOC105377162	ncRNA
siCtrl_G9a_GST_peak_2255	chr13	86240650	86240726	+	105	NA	Intergenic	MER50|LTR|ERV1	132866	NM_032229	84189	Hs.525105	NM_032229	ENSG00000184564	SLITRK6	DFNMYP	SLIT and NTRK like family member 6	protein-coding
siCtrl_G9a_GST_peak_6983	chr9	69064562	69064651	+	105	NA	promoter-TSS (NR_034006).2	promoter-TSS (NR_034006).2	-884	NR_034006	100132352	Hs.231861	NR_034006		FRG1HP	-	FSHD region gene 1 family member H, pseudogene	pseudo
siCtrl_G9a_GST_peak_2182	chr13	46399374	46399714	+	105	NA	intron (NM_198849, intron 1 of 1)	intron (NM_198849, intron 1 of 1)	26344	NM_198849	283514	Hs.368483	NM_198849	ENSG00000215475	SIAH3	-	siah E3 ubiquitin protein ligase family member 3	protein-coding
siCtrl_G9a_GST_peak_7014	chr9	78872218	78872453	+	105	NA	intron (NM_001190482, intron 24 of 36)	intron (NM_001190482, intron 24 of 36)	137007	NM_018339	55312	Hs.37558	NM_018339	ENSG00000135002	RFK	RIFK	riboflavin kinase	protein-coding
siCtrl_G9a_GST_peak_5534	chr6	6633080	6633152	+	105	NA	intron (NM_004271, intron 3 of 4)	intron (NM_004271, intron 3 of 4)	-10057	NR_026970	285780	Hs.655737	NM_173675	ENSG00000216863	LY86-AS1	LY86-AS|LY86AS	LY86 antisense RNA 1	ncRNA
siCtrl_G9a_GST_peak_1732	chr12	45022119	45022268	+	105	NA	intron (NM_001145108, intron 13 of 19)	intron (NM_001145108, intron 13 of 19)	247251	NM_001145109	4753	Hs.505326	NM_006159	ENSG00000184613	NELL2	NRP2	neural EGFL like 2	protein-coding
siCtrl_G9a_GST_peak_6684	chr8	52601544	52601626	+	105	NA	intron (NM_144651, intron 1 of 22)	intron (NM_144651, intron 1 of 22)	120420	NM_144651	137902	Hs.444882	NM_144651	ENSG00000147485	PXDNL	PMR1|PRM1|VPO2	peroxidasin like	protein-coding
siCtrl_G9a_GST_peak_7063	chr9	98754992	98755178	+	105	NA	intron (NM_020207, intron 17 of 18)	intron (NM_020207, intron 17 of 18)	29008	NR_024129	100188953	Hs.434310	NR_024129	ENSG00000225194	LINC00092	NCRNA00092	long intergenic non-protein coding RNA 92	ncRNA
siCtrl_G9a_GST_peak_402	chr1	109004239	109004447	+	105	NA	intron (NM_001143988, intron 11 of 14)	intron (NM_001143988, intron 11 of 14)	11439	NM_001143988	653149	Hs.712226	NM_001143987	ENSG00000186086	NBPF6	-	NBPF member 6	protein-coding
siCtrl_G9a_GST_peak_3006	chr17	43365401	43365536	+	105	NA	intron (NM_003954, intron 3 of 15)	intron (NM_003954, intron 3 of 15)	-26007	NM_152343	124783	Hs.412719	NM_152343	ENSG00000184361	SPATA32	AEP2|C17orf46|TEX34|VAD1.2	spermatogenesis associated 32	protein-coding
siCtrl_G9a_GST_peak_297	chr1	90658936	90659061	+	105	NA	Intergenic	Intergenic	198329	NM_001320185	284695	Hs.306221	NM_181781	ENSG00000162664	ZNF326	ZAN75|ZIRD|Zfp326|dJ871E2.1	zinc finger protein 326	protein-coding
siCtrl_G9a_GST_peak_6521	chr7	142252254	142252455	+	105	NA	Intergenic	Intergenic	-94936	NR_162121	113839523		NR_162121		MIR11400	-	microRNA 11400	ncRNA
siCtrl_G9a_GST_peak_1185	chr10	76346512	76346573	+	105	NA	intron (NM_001369123, intron 7 of 9)	AluSq|SINE|Alu	-57460	NR_120673	102723439		NR_120673		LOC102723439	-	uncharacterized LOC102723439	ncRNA
siCtrl_G9a_GST_peak_1672	chr12	29970321	29970820	+	105	NA	Intergenic	Intergenic	-32878	NM_175861	83857	Hs.401954	NM_031920	ENSG00000133687	TMTC1	ARG99|OLF|TMTC1A	transmembrane O-mannosyltransferase targeting cadherins 1	protein-coding
siCtrl_G9a_GST_peak_5792	chr6	95153585	95153838	+	105	NA	Intergenic	Intergenic	725690	NR_152795	643432	Hs.509936	NR_015362		TSG1	-	tumor suppressor TSG1	ncRNA
siCtrl_G9a_GST_peak_549	chr1	143119527	143119595	+	105	NA	Intergenic	Intergenic	82678	NR_110761	102723769	Hs.652926	NR_110761		LOC102723769	-	uncharacterized LOC102723769	ncRNA
siCtrl_G9a_GST_peak_5909	chr6	120376391	120376551	+	105	NA	Intergenic	L1PA17|LINE|L1	40146	NR_036098	100422951		NR_036098	ENSG00000265725	MIR3144	mir-3144	microRNA 3144	ncRNA
siCtrl_G9a_GST_peak_4916	chr4	26578243	26578371	+	105	NA	Intergenic	Intergenic	-7239	NM_001292054	55296	Hs.479403	NM_018317	ENSG00000109680	TBC1D19	-	TBC1 domain family member 19	protein-coding
siCtrl_G9a_GST_peak_1715	chr12	41819878	41820131	+	105	NA	intron (NM_001164595, intron 3 of 9)	intron (NM_001164595, intron 3 of 9)	-11537	NM_013377	29951	Hs.380044	NM_013377	ENSG00000165966	PDZRN4	LNX4|SAMCAP3L	PDZ domain containing ring finger 4	protein-coding
siCtrl_G9a_GST_peak_3637	chr2	40482993	40483056	+	105	NA	TTS (NR_038441)	TTS (NR_038441)	174420	NM_021097	6546	Hs.31961	NM_021097	ENSG00000183023	SLC8A1	NCX1	solute carrier family 8 member A1	protein-coding
siCtrl_G9a_GST_peak_5046	chr4	90222976	90223081	+	105	NA	intron (NM_198281, intron 1 of 1)	intron (NM_198281, intron 1 of 1)	5923	NM_198281	285513	Hs.100912	NM_198281	ENSG00000185477	GPRIN3	GRIN3	GPRIN family member 3	protein-coding
siCtrl_G9a_GST_peak_1857	chr12	71970461	71970641	+	105	NA	intron (NR_110596, intron 14 of 19)	intron (NR_110596, intron 14 of 19)	87077	NM_144982	196441	Hs.245798	NM_144982	ENSG00000133858	ZFC3H1	CCDC131|CSRC2|PSRC2	zinc finger C3H1-type containing	protein-coding
siCtrl_G9a_GST_peak_845	chr1	210970635	210970712	+	105	NA	intron (NM_002238, intron 9 of 10)	intron (NM_002238, intron 9 of 10)	336043	NR_046784	100874296	Hs.737764	NR_046784		KCNH1-IT1	-	KCNH1 intronic transcript 1	ncRNA
siCtrl_G9a_GST_peak_42	chr1	53480545	53480639	+	105	NA	promoter-TSS (NM_001007100)	promoter-TSS (NM_001007100)	-17	NM_001007099	6342	Hs.476365	NM_002979	ENSG00000116171	SCP2	NLTP|NSL-TP|SCP-2|SCP-CHI|SCP-X|SCPX	sterol carrier protein 2	protein-coding
siCtrl_G9a_GST_peak_4171	chr2	223313555	223313773	+	105	NA	intron (NM_001320833, intron 2 of 5)	Plat_L3|LINE|CR1	24402	NM_152386	130367	Hs.210043	NM_152386	ENSG00000163082	SGPP2	SPP2|SPPase2	sphingosine-1-phosphate phosphatase 2	protein-coding
siCtrl_G9a_GST_peak_1054	chr1	243579011	243579282	+	105	NA	intron (NM_001350249, intron 14 of 17)	intron (NM_001350249, intron 14 of 17)	69668	NR_039824	100616343		NR_039824	ENSG00000265201	MIR4677	mir-4677	microRNA 4677	ncRNA
siCtrl_G9a_GST_peak_5691	chr6	51928506	51928597	+	105	NA	intron (NM_138694, intron 13 of 66)	MER20|DNA|hAT-Charlie	23860	NM_170724	5314	Hs.662050	NM_138694	ENSG00000170927	PKHD1	ARPKD|FCYT|FPC|PKD4|TIGM1	PKHD1 ciliary IPT domain containing fibrocystin/polyductin	protein-coding
siCtrl_G9a_GST_peak_1699	chr12	39283401	39283716	+	105	NA	intron (NM_153634, intron 1 of 19)	intron (NM_153634, intron 1 of 19)	15835	NM_153634	144402	Hs.40910	NM_153634	ENSG00000139117	CPNE8	-	copine 8	protein-coding
siCtrl_G9a_GST_peak_4134	chr2	209473505	209473701	+	105	NA	intron (NR_136588, intron 2 of 5)	MLT1E1A|LTR|ERVL-MaLR	66236	NR_136588	101927960	Hs.159960	NR_136588		LOC101927960	-	uncharacterized LOC101927960	ncRNA
siCtrl_G9a_GST_peak_3890	chr2	98960944	98961021	+	105	NA	Intergenic	Intergenic	-1636	NM_001298	1261	Hs.234785	NM_001298	ENSG00000144191	CNGA3	ACHM2|CCNC1|CCNCa|CCNCalpha|CNCG3|CNG3	cyclic nucleotide gated channel alpha 3	protein-coding
siCtrl_G9a_GST_peak_5017	chr4	68160662	68160721	+	105	NA	Intergenic	L1PA4|LINE|L1	127027	NR_110747	101927237	Hs.435644	NR_110747	ENSG00000250075	LOC101927237	-	uncharacterized LOC101927237	ncRNA
siCtrl_G9a_GST_peak_2698	chr15	88458261	88458326	+	105	NA	intron (NM_001012338, intron 17 of 19)	HAL1-2a_MD|LINE|L1	31206	NR_162119	113218493		NR_162119		MIR11181	-	microRNA 11181	ncRNA
siCtrl_G9a_GST_peak_3975	chr2	137299799	137300303	+	105	NA	Intergenic	Intergenic	-223064	NM_001316349	80731	Hs.68533	NM_001080427	ENSG00000144229	THSD7B	-	thrombospondin type 1 domain containing 7B	protein-coding
siCtrl_G9a_GST_peak_6794	chr8	110663322	110663444	+	105	NA	TTS (NR_161375)	TTS (NR_161375)	-2251	NM_001099748	55638	Hs.390738	NM_017786	ENSG00000147642	SYBU	GOLSYN|OCSYN|SNPHL	syntabulin	protein-coding
siCtrl_G9a_GST_peak_5903	chr6	119835645	119835719	+	105	NA	Intergenic	MLT1K|LTR|ERVL-MaLR	-23215	NR_046100	285762	Hs.571063	NR_046100		LOC285762	-	uncharacterized LOC285762	ncRNA
siCtrl_G9a_GST_peak_6527	chr7	147500496	147500731	+	105	NA	intron (NM_014141, intron 12 of 22)	intron (NM_014141, intron 12 of 22)	131842	NR_133930	105375556	Hs.667432	NR_133929	ENSG00000230190	LOC105375556	-	uncharacterized LOC105375556	ncRNA
siCtrl_G9a_GST_peak_5260	chr5	58519261	58519356	+	105	NA	intron (NM_001349243, intron 4 of 16)	intron (NM_001349243, intron 4 of 16)	52633	NM_001197220	5144	Hs.117545	NM_006203	ENSG00000113448	PDE4D	ACRDYS2|DPDE3|HSPDE4D|PDE43|PDE4DN2|STRK1	phosphodiesterase 4D	protein-coding
siCtrl_G9a_GST_peak_6602	chr8	26894097	26894200	+	105	NA	Intergenic	Intergenic	12332	NR_031680	100313884		NR_031680	ENSG00000221616	MIR548H4	MIR548H-4|MIRN548H4|hsa-mir-548h-4	microRNA 548h-4	ncRNA
siCtrl_G9a_GST_peak_6696	chr8	62461423	62461509	+	105	NA	intron (NM_001164750, intron 20 of 24)	intron (NM_001164750, intron 20 of 24)	140904	NM_001164751	444	Hs.332422	NM_004318	ENSG00000198363	ASPH	AAH|BAH|CASQ2BP1|FDLAB|HAAH|JCTN|junctin	aspartate beta-hydroxylase	protein-coding
siCtrl_G9a_GST_peak_7308	chrY	2230777	2231129	+	105	NA	intron (NM_145177, intron 3 of 6).2	intron (NM_145177, intron 3 of 6).2	137627	NM_001171135	9189	Hs.131452	NM_004729	ENSG00000214717	ZBED1	ALTE|DREF|TRAMP|hDREF	zinc finger BED-type containing 1	protein-coding
siCtrl_G9a_GST_peak_5718	chr6	64935286	64935349	+	105	NA	intron (NM_001292009, intron 31 of 43)	MLT1D|LTR|ERVL-MaLR	418588	NR_157848	112935969		NR_157848		SCAT8	EYS-AS1	S-phase cancer associated transcript 8	ncRNA
siCtrl_G9a_GST_peak_3971	chr2	137063410	137063489	+	105	NA	Intergenic	MLT1F2|LTR|ERVL-MaLR	-187724	NM_003467	7852	Hs.593413	NM_003467	ENSG00000121966	CXCR4	CD184|D2S201E|FB22|HM89|HSY3RR|LAP-3|LAP3|LCR1|LESTR|NPY3R|NPYR|NPYRL|NPYY3R|WHIM|WHIMS	C-X-C motif chemokine receptor 4	protein-coding
siCtrl_G9a_GST_peak_4534	chr22	34226010	34226097	+	105	NA	intron (NM_001362953, intron 1 of 14)	intron (NM_001362953, intron 1 of 14)	90363	NM_004737	9215	Hs.474667	NM_004737	ENSG00000133424	LARGE1	LARGE|MDC1D|MDDGA6|MDDGB6	LARGE xylosyl- and glucuronyltransferase 1	protein-coding
siCtrl_G9a_GST_peak_3579	chr2	29966828	29966925	+	105	NA	intron (NM_004304, intron 1 of 28)	intron (NM_004304, intron 1 of 28)	177576	NM_004304	238	Hs.654469	NM_004304	ENSG00000171094	ALK	CD246|NBLST3	ALK receptor tyrosine kinase	protein-coding
siCtrl_G9a_GST_peak_5245	chr5	53955822	53955881	+	105	NA	TTS (NR_104659)	TTS (NR_104659)	43301	NR_104659	102467080	Hs.637409	NR_104658		LOC102467080	-	uncharacterized LOC102467080	ncRNA
siCtrl_G9a_GST_peak_2824	chr16	27930761	27931146	+	105	NA	intron (NM_001109763, intron 2 of 6)	MLT1K|LTR|ERVL-MaLR	-31475	NM_144675	146395	Hs.91910	NM_144675	ENSG00000169181	GSG1L	PRO19651	GSG1 like	protein-coding
siCtrl_G9a_GST_peak_1815	chr12	67852017	67852122	+	105	NA	Intergenic	Intergenic	-15730	NR_146500	102724433		NR_146500	ENSG00000256172	LINC02420	-	long intergenic non-protein coding RNA 2420	ncRNA
siCtrl_G9a_GST_peak_2359	chr14	61611567	61611648	+	105	NA	Intergenic	Intergenic	136449	NM_001017970	161291	Hs.146180	NM_001017970	ENSG00000182107	TMEM30B	CDC50B	transmembrane protein 30B	protein-coding
siCtrl_G9a_GST_peak_1916	chr12	90647478	90647944	+	105	NA	Intergenic	Intergenic	-39384	NR_135018	105369893	Hs.577777	NR_135018		LINC02392	-	long intergenic non-protein coding RNA 2392	ncRNA
siCtrl_G9a_GST_peak_685	chr1	179893634	179893802	+	105	NA	Intergenic	MER21B|LTR|ERVL	-30227	NM_014810	9857	Hs.413045	NM_014810	ENSG00000135837	CEP350	CAP350|GM133	centrosomal protein 350	protein-coding
siCtrl_G9a_GST_peak_2097	chr12	128207284	128207966	+	105	NA	Intergenic	Intergenic	-67492	NR_134995	105370068	Hs.524845	NR_134995		LOC105370068	-	uncharacterized LOC105370068	ncRNA
siCtrl_G9a_GST_peak_5837	chr6	106698878	106699018	+	105	NA	intron (NM_001286111, intron 2 of 4)	LTR41B|LTR|ERVL	65193	NR_104402	9474	Hs.486063	NM_004849	ENSG00000057663	ATG5	APG5|APG5-LIKE|APG5L|ASP|SCAR25|hAPG5	autophagy related 5	protein-coding
siCtrl_G9a_GST_peak_3016	chr17	45282408	45282523	+	105	NA	Intergenic	Intergenic	-3963	NM_001002841	4635	Hs.463300	NM_002476	ENSG00000198336	MYL4	ALC1|AMLC|GT1|PRO1957	myosin light chain 4	protein-coding
siCtrl_G9a_GST_peak_111	chr1	59622337	59622581	+	105	NA	Intergenic	Intergenic	-9980	NR_027120	729467	Hs.662291	NR_027120	ENSG00000224609	HSD52	-	uncharacterized LOC729467	ncRNA
siCtrl_G9a_GST_peak_2499	chr15	47801447	47801516	+	105	NA	intron (NM_001198999, intron 3 of 19)	intron (NM_001198999, intron 3 of 19)	-208221	NM_001358351	80031	Hs.511265	NM_020858	ENSG00000137872	SEMA6D	-	semaphorin 6D	protein-coding
siCtrl_G9a_GST_peak_5675	chr6	50061281	50061340	+	105	NA	Intergenic	Intergenic	-43668	NM_001369057	245915	Hs.571092	NM_001037498	ENSG00000180872	DEFB112	DEFB-12	defensin beta 112	protein-coding
siCtrl_G9a_GST_peak_2486	chr15	46524785	46525052	+	105	NA	Intergenic	ERVL-E-int|LTR|ERVL	527525	NR_135680	105370802	Hs.447522	NR_135680	ENSG00000259200	LOC105370802	-	uncharacterized LOC105370802	ncRNA
siCtrl_G9a_GST_peak_2082	chr12	126954187	126954255	+	105	NA	intron (NR_130748, intron 9 of 11)	intron (NR_130748, intron 9 of 11)	-20348	NR_147498	283435	Hs.667334	NR_147498		LINC02825	-	long intergenic non-protein coding RNA 2825	ncRNA
siCtrl_G9a_GST_peak_4581	chr3	16175697	16175919	+	105	NA	Intergenic	MLT1G1|LTR|ERVL-MaLR	-40379	NM_054110	117248	Hs.411308	NM_054110	ENSG00000131386	GALNT15	GALNACT15|GALNT13|GALNT7|GALNTL2|PIH5|pp-GalNAc-T15	polypeptide N-acetylgalactosaminyltransferase 15	protein-coding
siCtrl_G9a_GST_peak_6106	chr7	7594694	7594778	+	105	NA	intron (NR_110084, intron 3 of 4)	MIR|SINE|MIR	10960	NR_110084	101927391	Hs.223837	NR_110084		LOC101927391	-	uncharacterized LOC101927391	ncRNA
siCtrl_G9a_GST_peak_5796	chr6	95996350	95996426	+	105	NA	Intergenic	MER74A|LTR|ERVL	28939	NR_047502	101927288	Hs.616643	NR_047502	ENSG00000261366	MANEA-DT	MANEA-AS1	MANEA divergent transcript	ncRNA
siCtrl_G9a_GST_peak_6828	chr8	127180925	127181018	+	105	NA	Intergenic	Intergenic	-156769	NR_125421	101927657	Hs.552133	NR_125421	ENSG00000244791	LOC101927657	-	uncharacterized LOC101927657	ncRNA
siCtrl_G9a_GST_peak_5940	chr6	131526527	131526586	+	105	NA	intron (NM_016377, intron 6 of 7)	intron (NM_016377, intron 6 of 7)	-44988	NM_138633	9465	Hs.486483	NM_004842	ENSG00000118507	AKAP7	AKAP15|AKAP18	A-kinase anchoring protein 7	protein-coding
siCtrl_G9a_GST_peak_5768	chr6	90246214	90246278	+	105	NA	intron (NM_014942, intron 1 of 15)	intron (NM_014942, intron 1 of 15)	-25791	NM_001242811	22881	Hs.702213	NM_014942	ENSG00000135299	ANKRD6	-	ankyrin repeat domain 6	protein-coding
siCtrl_G9a_GST_peak_5887	chr6	116843132	116843232	+	105	NA	3' UTR (NM_153711, exon 2 of 2)	3' UTR (NM_153711, exon 2 of 2)	-7024	NM_001256887	221301	Hs.350750	NM_153036	ENSG00000164451	CALHM4	C6orf78|FAM26D	calcium homeostasis modulator family member 4	protein-coding
siCtrl_G9a_GST_peak_2004	chr12	106452141	106452347	+	105	NA	Intergenic	Intergenic	81567	NM_014840	9891	Hs.524692	NM_014840	ENSG00000074590	NUAK1	ARK5	NUAK family kinase 1	protein-coding
siCtrl_G9a_GST_peak_388	chr1	108077355	108077524	+	105	NA	Intergenic	Intergenic	153682	NM_001079874	10451	Hs.267659	NM_006113	ENSG00000134215	VAV3	-	vav guanine nucleotide exchange factor 3	protein-coding
siCtrl_G9a_GST_peak_4792	chr3	131727935	131728310	+	105	NA	intron (NM_001289112, intron 1 of 15)	intron (NM_001289112, intron 1 of 15)	-23347	NR_049890	100847040		NR_049890	ENSG00000265859	MIR5704	-	microRNA 5704	ncRNA
siCtrl_G9a_GST_peak_1209	chr10	81629291	81629576	+	105	NA	Intergenic	Intergenic	28319	NM_001355263	283008		NM_001355263	ENSG00000228570	NUTM2E	FAM22E	NUT family member 2E	protein-coding
siCtrl_G9a_GST_peak_4552	chr3	466827	466919	+	105	NA	Intergenic	Intergenic	-39395	NR_110739	101927193	Hs.677744	NR_110739	ENSG00000234661	CHL1-AS1	-	CHL1 antisense RNA 1	ncRNA
siCtrl_G9a_GST_peak_3062	chr17	52872084	52872244	+	105	NA	Intergenic	LTR19C|LTR|ERV1	-105888	NM_001321175	10040	Hs.153504	NM_005486	ENSG00000141198	TOM1L1	SRCASM	target of myb1 like 1 membrane trafficking protein	protein-coding
siCtrl_G9a_GST_peak_7169	chrX	19254885	19254944	+	105	NA	Intergenic	AluSc8|SINE|Alu	-107097	NM_001173456	5160	Hs.530331	NM_000284	ENSG00000131828	PDHA1	PDHA|PDHAD|PDHCE1A|PHE1A	pyruvate dehydrogenase E1 alpha 1 subunit	protein-coding
siCtrl_G9a_GST_peak_4694	chr3	72708591	72708904	+	105	NA	Intergenic	MIRb|SINE|MIR	4653	NR_135531	105377162	Hs.123457	NR_135531		LOC105377162	-	uncharacterized LOC105377162	ncRNA
siCtrl_G9a_GST_peak_5402	chr5	135464250	135464537	+	105	NA	TTS (NR_026763)	TTS (NR_026763)	-4141	NM_005903	4090	Hs.167700	NM_005903	ENSG00000113658	SMAD5	DWFC|JV5-1|MADH5	SMAD family member 5	protein-coding
siCtrl_G9a_GST_peak_3328	chr18	43257245	43257473	+	105	NA	intron (NM_001242692, intron 19 of 20)	intron (NM_001242692, intron 19 of 20)	-46787	NM_001308279	6563	Hs.101307	NM_015865	ENSG00000141469	SLC14A1	HUT11|HsT1341|JK|RACH1|RACH2|UT-B1|UT1|UTE	solute carrier family 14 member 1 (Kidd blood group)	protein-coding
siCtrl_G9a_GST_peak_4177	chr2	224588939	224589089	+	105	NA	Intergenic	LTR9|LTR|ERV1	113285	NR_110905	130340	Hs.632555	NM_178814	ENSG00000152056	AP1S3	PSORS15	adaptor related protein complex 1 subunit sigma 3	protein-coding
siCtrl_G9a_GST_peak_3461	chr2	5549459	5549539	+	105	NA	Intergenic	Intergenic	281751	NR_110580	102723818	Hs.128107	NR_110580		LINC01248	-	long intergenic non-protein coding RNA 1248	ncRNA
siCtrl_G9a_GST_peak_4806	chr3	136555341	136555541	+	105	NA	intron (NM_025246, intron 1 of 1)	intron (NM_025246, intron 1 of 1)	17473	NM_025246	80723	Hs.477692	NM_025246	ENSG00000168917	SLC35G2	TMEM22	solute carrier family 35 member G2	protein-coding
siCtrl_G9a_GST_peak_5664	chr6	44780520	44780700	+	105	NA	intron (NR_146632, intron 11 of 11)	L1ME1|LINE|L1	-260992	NR_134609	105375075	Hs.123393	NR_134609		LOC105375075	-	uncharacterized LOC105375075	ncRNA
siCtrl_G9a_GST_peak_1625	chr12	20365745	20365845	+	105	NA	Intergenic	Intergenic	-84960	NR_146523	105369684		NR_146523		LINC02468	-	long intergenic non-protein coding RNA 2468	ncRNA
siCtrl_G9a_GST_peak_1340	chr11	11096259	11096433	+	105	NA	Intergenic	Intergenic	216582	NR_034137	729013	Hs.726427	NR_034137	ENSG00000247271	ZBED5-AS1	-	ZBED5 antisense RNA 1	ncRNA
siCtrl_G9a_GST_peak_3878	chr2	98047071	98047140	+	105	NA	Intergenic	MER66D|LTR|ERV1	42515	NR_103733	100506076	Hs.732616	NR_103732		LOC100506076	-	uncharacterized LOC100506076	ncRNA
siCtrl_G9a_GST_peak_4364	chr20	51418348	51418495	+	105	NA	Intergenic	Intergenic	-170476	NM_173485	128553	Hs.473117	NM_173485	ENSG00000182463	TSHZ2	C20orf17|OVC10-2|TSH2|ZABC2|ZNF218	teashirt zinc finger homeobox 2	protein-coding
siCtrl_G9a_GST_peak_7084	chr9	108618497	108618652	+	105	NA	Intergenic	Intergenic	161752	NM_018112	55151	Hs.411925	NM_018112	ENSG00000095209	TMEM38B	C9orf87|D4Ertd89e|OI14|TRIC-B|TRICB|bA219P18.1	transmembrane protein 38B	protein-coding
siCtrl_G9a_GST_peak_5124	chr4	172142399	172142657	+	105	NA	Intergenic	Intergenic	35193	NR_106730	102466953		NR_106730	ENSG00000278502	MIR6082	hsa-mir-6082	microRNA 6082	ncRNA
siCtrl_G9a_GST_peak_4834	chr3	155991047	155991170	+	105	NA	intron (NM_003471, intron 1 of 13)	L1MA2|LINE|L1	-17668	NM_172159	7881	Hs.654519	NM_003471	ENSG00000169282	KCNAB1	AKR6A3|KCNA1B|KV-BETA-1|Kvb1.3|hKvBeta3|hKvb3	potassium voltage-gated channel subfamily A member regulatory beta subunit 1	protein-coding
siCtrl_G9a_GST_peak_7011	chr9	76897720	76897885	+	105	NA	Intergenic	MamGypLTR1c|LTR|Gypsy	-88645	NR_121182	101927358	Hs.559523	NR_121182	ENSG00000227809	LOC101927358	-	uncharacterized LOC101927358	ncRNA
siCtrl_G9a_GST_peak_5088	chr4	140701013	140701084	+	105	NA	intron (NM_018717, intron 2 of 4)	intron (NM_018717, intron 2 of 4)	114075	NM_002413	4258	Hs.81874	NM_002413	ENSG00000085871	MGST2	GST2|MGST-II	microsomal glutathione S-transferase 2	protein-coding
siCtrl_G9a_GST_peak_4383	chr20	57496784	57496874	+	105	NA	Intergenic	L2a|LINE|L2	29611	NR_132272	2778	Hs.125898	NM_000516	ENSG00000087460	GNAS	AHO|C20orf45|GNAS1|GPSA|GSA|GSP|NESP|PITA3|POH|SCG6|SgVI	GNAS complex locus	protein-coding
siCtrl_G9a_GST_peak_343	chr1	96101807	96102128	+	105	NA	Intergenic	Intergenic	126295	NR_110621	100996635	Hs.639548	NR_110621	ENSG00000228971	LINC02607	-	long intergenic non-protein coding RNA 2607	ncRNA
siCtrl_G9a_GST_peak_4517	chr22	26450522	26450604	+	104	NA	Intergenic	Intergenic	-114865	NM_021115	23544	Hs.194766	NM_021115	ENSG00000100095	SEZ6L	-	seizure related 6 homolog like	protein-coding
siCtrl_G9a_GST_peak_5175	chr5	6912364	6912515	+	104	NA	Intergenic	Intergenic	-84405	NR_036242	100422999		NR_036242	ENSG00000283420	MIR4278	-	microRNA 4278	ncRNA
siCtrl_G9a_GST_peak_7086	chr9	108643439	108643525	+	104	NA	Intergenic	Intergenic	186660	NM_018112	55151	Hs.411925	NM_018112	ENSG00000095209	TMEM38B	C9orf87|D4Ertd89e|OI14|TRIC-B|TRICB|bA219P18.1	transmembrane protein 38B	protein-coding
siCtrl_G9a_GST_peak_1893	chr12	79696445	79696523	+	104	NA	intron (NM_001135806, intron 7 of 9)	intron (NM_001135806, intron 7 of 9)	-116553	NR_031700	100302136		NR_031700	ENSG00000221788	MIR1252	MIRN1252|hsa-mir-1252	microRNA 1252	ncRNA
siCtrl_G9a_GST_peak_1458	chr11	72740508	72740679	+	104	NA	intron (NM_014824, intron 3 of 19)	L1M4c|LINE|L1	112770	NM_014824	9873	Hs.744959	NM_014824	ENSG00000137478	FCHSD2	NWK|NWK1|SH3MD3	FCH and double SH3 domains 2	protein-coding
siCtrl_G9a_GST_peak_3339	chr18	48277347	48277412	+	104	NA	Intergenic	MLT1A0|LTR|ERVL-MaLR	69007	NM_001127175	83876	Hs.30495	NM_031939	ENSG00000134042	MRO	B29|C18orf3	maestro	protein-coding
siCtrl_G9a_GST_peak_5907	chr6	120208819	120208975	+	104	NA	Intergenic	MER130|Unknown?|Unknown?	-127428	NR_036098	100422951		NR_036098	ENSG00000265725	MIR3144	mir-3144	microRNA 3144	ncRNA
siCtrl_G9a_GST_peak_3588	chr2	30232124	30232387	+	104	NA	Intergenic	Intergenic	-87803	NM_004304	238	Hs.654469	NM_004304	ENSG00000171094	ALK	CD246|NBLST3	ALK receptor tyrosine kinase	protein-coding
siCtrl_G9a_GST_peak_6964	chr9	68424099	68424230	+	104	NA	Intergenic	L2a|LINE|L2	-8776	NR_039688	100616184		NR_039688	ENSG00000276029	MIR4477A	-	microRNA 4477a	ncRNA
siCtrl_G9a_GST_peak_1272	chr10	117723503	117723595	+	104	NA	Intergenic	MIRb|SINE|MIR	230752	NR_145811	109623470		NR_145811		SNORD158	-	small nucleolar RNA, C/D box 158	snoRNA
siCtrl_G9a_GST_peak_686	chr1	180584003	180584134	+	104	NA	Intergenic	Intergenic	-17090	NM_001135669	9213	Hs.227656	NM_004736	ENSG00000143324	XPR1	IBGC6|SLC53A1|SYG1|X3	xenotropic and polytropic retrovirus receptor 1	protein-coding
siCtrl_G9a_GST_peak_888	chr1	218949299	218949442	+	104	NA	intron (NR_031644, intron 4 of 6)	intron (NR_031644, intron 4 of 6)	142483	NR_146917	105372925	Hs.666318	NR_146917		LINC01710	-	long intergenic non-protein coding RNA 1710	ncRNA
siCtrl_G9a_GST_peak_925	chr1	221202443	221202685	+	104	NA	Intergenic	Intergenic	-149082	NR_046901	100873924	Hs.645593	NR_046901	ENSG00000257551	HLX-AS1	-	HLX antisense RNA 1	ncRNA
siCtrl_G9a_GST_peak_6045	chr6	161043575	161043644	+	104	NA	intron (NM_005577, intron 12 of 38)	intron (NM_005577, intron 12 of 38)	41682	NM_005577	4018	Hs.520120	NM_005577	ENSG00000198670	LPA	AK38|APOA|LP	lipoprotein(a)	protein-coding
siCtrl_G9a_GST_peak_5172	chr5	5381989	5382065	+	104	NA	Intergenic	Intergenic	-40763	NM_015325	23379	Hs.449296	NM_015325	ENSG00000164151	ICE1	KIAA0947	interactor of little elongation complex ELL subunit 1	protein-coding
siCtrl_G9a_GST_peak_4689	chr3	72011746	72011998	+	104	NA	Intergenic	LTR33|LTR|ERVL	137734	NR_104116	285286	Hs.559386	NR_104116	ENSG00000241163	LINC00877	-	long intergenic non-protein coding RNA 877	ncRNA
siCtrl_G9a_GST_peak_3435	chr19	55517494	55517589	+	104	NA	Intergenic	Intergenic	32091	NM_001256017	51206	Hs.661752	NM_016363	ENSG00000088053	GP6	BDPLT11|GPIV|GPVI	glycoprotein VI platelet	protein-coding
siCtrl_G9a_GST_peak_2160	chr13	37332681	37332745	+	104	NA	Intergenic	Intergenic	-60626	NM_000538	5994	Hs.24422	NM_000538	ENSG00000133111	RFXAP	-	regulatory factor X associated protein	protein-coding
siCtrl_G9a_GST_peak_1160	chr10	61385733	61386034	+	104	NA	Intergenic	Intergenic	83766	NM_001323978	220963	Hs.499709	NM_194298	ENSG00000165449	SLC16A9	C10orf36|MCT9	solute carrier family 16 member 9	protein-coding
siCtrl_G9a_GST_peak_721	chr1	198500175	198500401	+	104	NA	intron (NM_133262, intron 2 of 3)	intron (NM_133262, intron 2 of 3)	9787	NM_133262	127124	Hs.127743	NM_133262	ENSG00000151418	ATP6V1G3	ATP6G3|Vma10	ATPase H+ transporting V1 subunit G3	protein-coding
siCtrl_G9a_GST_peak_3995	chr2	151889340	151889438	+	104	NA	Intergenic	MLT1J2|LTR|ERVL-MaLR	228988	NM_198557	375287	Hs.302442	NM_198557	ENSG00000184898	RBM43	C2orf38	RNA binding motif protein 43	protein-coding
siCtrl_G9a_GST_peak_4158	chr2	217919818	217919884	+	104	NA	Intergenic	Intergenic	184356	NR_130782	101928327	Hs.350698	NR_130782	ENSG00000223874	LINC01921	-	long intergenic non-protein coding RNA 1921	ncRNA
siCtrl_G9a_GST_peak_5107	chr4	159745668	159745805	+	104	NA	intron (NM_001366843, intron 1 of 17)	L2b|LINE|L2	18745	NM_001323916	57600	Hs.652441	NM_020840	ENSG00000052795	FNIP2	FNIPL|MAPO1	folliculin interacting protein 2	protein-coding
siCtrl_G9a_GST_peak_2032	chr12	113252905	113252990	+	104	NA	intron (NM_001347955, intron 2 of 20)	LTR33|LTR|ERVL	23394	NR_145127	22895	Hs.21239	NM_014954	ENSG00000089169	RPH3A	-	rabphilin 3A	protein-coding
siCtrl_G9a_GST_peak_3469	chr2	6374299	6374467	+	104	NA	Intergenic	Intergenic	141171	NR_110251	101929390	Hs.434407	NR_110251	ENSG00000227007	LINC01247	-	long intergenic non-protein coding RNA 1247	ncRNA
siCtrl_G9a_GST_peak_1094	chr10	22730816	22730977	+	104	NA	Intergenic	MLT1H|LTR|ERVL-MaLR	-4038	NR_036533	100499489	Hs.7444	NR_036533		LOC100499489	-	uncharacterized LOC100499489	ncRNA
siCtrl_G9a_GST_peak_5180	chr5	9861884	9861963	+	104	NA	intron (NR_027112, intron 4 of 12)	intron (NR_027112, intron 4 of 12)	7434	NR_147004	105374648	Hs.158853	NR_147004		LINC02221	-	long intergenic non-protein coding RNA 2221	ncRNA
siCtrl_G9a_GST_peak_4711	chr3	73852945	73853046	+	104	NA	Intergenic	THE1D|LTR|ERVL-MaLR	-5400	NR_146637	105377165		NR_146637		LINC02005	-	long intergenic non-protein coding RNA 2005	ncRNA
siCtrl_G9a_GST_peak_6437	chr7	127588674	127588863	+	104	NA	intron (NM_014390, intron 15 of 23)	intron (NM_014390, intron 15 of 23)	-48794	NR_027330	27099	Hs.657377	NM_014411	ENSG00000279078	SND1-IT1	C7orf54|NAG8|NSG-X	SND1 intronic transcript 1	ncRNA
siCtrl_G9a_GST_peak_2682	chr15	87136001	87136155	+	104	NA	intron (NM_152336, intron 22 of 24)	MER50|LTR|ERV1	-275879	NR_046012	727915	Hs.451281	NR_046012	ENSG00000260125	AGBL1-AS1	-	AGBL1 antisense RNA 1	ncRNA
siCtrl_G9a_GST_peak_4424	chr21	27926748	27926968	+	104	NA	intron (NR_135515, intron 3 of 3)	intron (NR_135515, intron 3 of 3)	18747	NM_052954	116159	Hs.37445	NM_052954	ENSG00000166265	CYYR1	C21orf95	cysteine and tyrosine rich 1	protein-coding
siCtrl_G9a_GST_peak_5324	chr5	80479469	80479576	+	104	NA	intron (NM_006909, intron 18 of 26)	MIR3|SINE|MIR	-49617	NM_001099736	1160	Hs.80691	NM_001825	ENSG00000131730	CKMT2	SMTCK	creatine kinase, mitochondrial 2	protein-coding
siCtrl_G9a_GST_peak_6058	chr6	161381159	161381302	+	104	NA	Intergenic	Intergenic	-31529	NM_001301072	4216	Hs.390428	NM_005922	ENSG00000085511	MAP3K4	MAPKKK4|MEKK 4|MEKK4|MTK1|PRO0412	mitogen-activated protein kinase kinase kinase 4	protein-coding
siCtrl_G9a_GST_peak_5680	chr6	50559090	50559265	+	104	NA	Intergenic	Intergenic	-122080	NM_172238	83741	Hs.434107	NM_172238	ENSG00000008197	TFAP2D	TFAP2BL1	transcription factor AP-2 delta	protein-coding
siCtrl_G9a_GST_peak_1980	chr12	103989976	103990085	+	104	NA	intron (NM_017564, intron 3 of 68)	intron (NM_017564, intron 3 of 68)	8979	NM_017564	55576	Hs.408249	NM_017564	ENSG00000136011	STAB2	FEEL2|FELE-2|FELL2|FEX2|HARE|SCARH1	stabilin 2	protein-coding
siCtrl_G9a_GST_peak_5311	chr5	73788512	73788727	+	104	NA	intron (NR_126354, intron 1 of 2)	MER21B|LTR|ERVL	44182	NR_126354	104310351	Hs.582291	NR_126354	ENSG00000248673	LINC01331	-	long intergenic non-protein coding RNA 1331	ncRNA
siCtrl_G9a_GST_peak_3419	chr19	31361957	31362211	+	104	NA	Intergenic	Intergenic	-296332	NR_147209	107985312	Hs.211053	NR_147209	ENSG00000267777	LINC01791	-	long intergenic non-protein coding RNA 1791	ncRNA
siCtrl_G9a_GST_peak_2338	chr14	52015737	52015796	+	104	NA	intron (NR_047477, intron 2 of 3)	intron (NR_047477, intron 2 of 3)	50904	NR_047477	100874185	Hs.578226	NR_047477	ENSG00000258537	FRMD6-AS2	-	FRMD6 antisense RNA 2	ncRNA
siCtrl_G9a_GST_peak_4676	chr3	64940900	64941250	+	104	NA	intron (NR_038264, intron 4 of 5)	intron (NR_038264, intron 4 of 5)	-267399	NM_001318781	56999	Hs.656071	NM_182920	ENSG00000163638	ADAMTS9	-	ADAM metallopeptidase with thrombospondin type 1 motif 9	protein-coding
siCtrl_G9a_GST_peak_4814	chr3	143056229	143056314	+	104	NA	intron (NM_173653, intron 14 of 15)	intron (NM_173653, intron 14 of 15)	-4817	NR_048544	100885796	Hs.581618	NR_048544	ENSG00000240012	SLC9A9-AS1	-	SLC9A9 antisense RNA 1	ncRNA
siCtrl_G9a_GST_peak_998	chr1	232821863	232822048	+	104	NA	Intergenic	Intergenic	-31862	NR_146922	105373199	Hs.254475	NR_146922	ENSG00000225919	LINC01745	-	long intergenic non-protein coding RNA 1745	ncRNA
siCtrl_G9a_GST_peak_4350	chr20	46909979	46910181	+	104	NA	Intergenic	AluJo|SINE|Alu	-78574	NR_026958	284749	Hs.299080	NR_026958	ENSG00000235621	LINC00494	-	long intergenic non-protein coding RNA 494	ncRNA
siCtrl_G9a_GST_peak_6876	chr9	2292091	2292238	+	104	NA	Intergenic	Intergenic	133708	NM_001289400	6595	Hs.298990	NM_003070	ENSG00000080503	SMARCA2	BAF190|BRM|NCBRS|SNF2|SNF2L2|SNF2LA|SWI2|Sth1p|hBRM|hSNF2a	SWI/SNF related, matrix associated, actin dependent regulator of chromatin, subfamily a, member 2	protein-coding
siCtrl_G9a_GST_peak_4049	chr2	182243125	182243280	+	104	NA	intron (NR_130784, intron 4 of 4)	intron (NR_130784, intron 4 of 4)	-72823	NR_039637	100616213		NR_039637	ENSG00000266705	MIR4437	mir-4437	microRNA 4437	ncRNA
siCtrl_G9a_GST_peak_2217	chr13	53643493	53643597	+	104	NA	Intergenic	Intergenic	40597	NM_006418	10562	Hs.508113	NM_006418	ENSG00000102837	OLFM4	GC1|GW112|OLM4|OlfD|UNQ362|bA209J19.1|hGC-1|hOLfD	olfactomedin 4	protein-coding
siCtrl_G9a_GST_peak_4919	chr4	28211112	28211314	+	104	NA	Intergenic	MSTB|LTR|ERVL-MaLR	-609991	NR_036237	100422937		NR_036237	ENSG00000283275	MIR4275	-	microRNA 4275	ncRNA
siCtrl_G9a_GST_peak_3364	chr18	57317557	57317758	+	104	NA	intron (NM_133459, intron 2 of 10)	intron (NM_133459, intron 2 of 10)	46998	NM_133459	147372	Hs.34333	NM_133459	ENSG00000183287	CCBE1	HKLLS1	collagen and calcium binding EGF domains 1	protein-coding
siCtrl_G9a_GST_peak_855	chr1	213405286	213405362	+	104	NA	intron (NM_001136138, intron 8 of 13)	intron (NM_001136138, intron 8 of 13)	180741	NM_012424	26750	Hs.591416	NM_012424	ENSG00000136643	RPS6KC1	RPK118|RSKL1|S6K-delta-1|S6PKh1|humS6PKh1	ribosomal protein S6 kinase C1	protein-coding
siCtrl_G9a_GST_peak_4752	chr3	115607883	115607991	+	104	NA	intron (NM_002338, intron 3 of 6)	intron (NM_002338, intron 3 of 6)	16036	NR_145779	109623450		NR_145779		SNORD155	-	small nucleolar RNA, C/D box 155	snoRNA
siCtrl_G9a_GST_peak_6187	chr7	31244276	31244367	+	104	NA	Intergenic	Intergenic	136019	NM_022728	63974	Hs.45152	NM_022728	ENSG00000164600	NEUROD6	Atoh2|MATH2|Math-2|NEX1M|Nex1|bHLHa2	neuronal differentiation 6	protein-coding
siCtrl_G9a_GST_peak_5491	chr5	168763310	168763422	+	104	NA	Intergenic	Intergenic	-35223	NM_003062	6586	Hs.552087	NM_003062	ENSG00000184347	SLIT3	MEGF5|SLIL2|SLIT1|Slit-3|slit2	slit guidance ligand 3	protein-coding
siCtrl_G9a_GST_peak_1930	chr12	93456116	93456225	+	104	NA	intron (NR_040096, intron 3 of 4)	intron (NR_040096, intron 3 of 4)	-111972	NR_120492	102724933	Hs.663947	NR_120492	ENSG00000258171	LINC02412	-	long intergenic non-protein coding RNA 2412	ncRNA
siCtrl_G9a_GST_peak_5944	chr6	133284549	133284617	+	104	NA	Intergenic	MIR3|SINE|MIR	-124636	NR_026969	285735	Hs.407549	NM_001037231		LINC00326	NCRNA00326	long intergenic non-protein coding RNA 326	ncRNA
siCtrl_G9a_GST_peak_6245	chr7	41170351	41170444	+	104	NA	non-coding (NR_110832, exon 5 of 6)	non-coding (NR_110832, exon 5 of 6)	29195	NR_110832	101928773	Hs.382363	NR_110832	ENSG00000224017	LINC01449	-	long intergenic non-protein coding RNA 1449	ncRNA
siCtrl_G9a_GST_peak_7121	chr9	120547551	120547611	+	104	NA	Intergenic	Intergenic	80900	NM_003266	7099	Hs.174312	NM_003266	ENSG00000136869	TLR4	ARMD10|CD284|TLR-4|TOLL	toll like receptor 4	protein-coding
siCtrl_G9a_GST_peak_6839	chr8	131314874	131315012	+	104	NA	intron (NM_018482, intron 3 of 29)	intron (NM_018482, intron 3 of 29)	-6164	NR_002765	29065	Hs.639318	NR_002765		ASAP1-IT1	ASAP1-IT|ASAP1IT|ASAP1IT1|DDEF1IT1|HSPC054|NCRNA00050	ASAP1 intronic transcript 1	ncRNA
siCtrl_G9a_GST_peak_801	chr1	209629249	209629319	+	104	NA	Intergenic	Intergenic	23806	NR_029622	406988		NR_029622	ENSG00000284485	MIR205	MIRN205|mir-205	microRNA 205	ncRNA
siCtrl_G9a_GST_peak_5377	chr5	122777109	122777266	+	104	NA	Intergenic	Intergenic	-17901	NM_001166226	153241	Hs.483209	NM_153223	ENSG00000168944	CEP120	CCDC100|JBTS31|SRTD13	centrosomal protein 120	protein-coding
siCtrl_G9a_GST_peak_3416	chr19	30540982	30541055	+	104	NA	Intergenic	Intergenic	107872	NM_003796	8725	Hs.466391	NM_003796	ENSG00000105176	URI1	C19orf2|NNX3|PPP1R19|RMP|URI	URI1 prefoldin like chaperone	protein-coding
siCtrl_G9a_GST_peak_4447	chr21	42295319	42295378	+	104	NA	Intergenic	Intergenic	-76264	NM_001271534	1826	Hs.160418	NM_001389	ENSG00000171587	DSCAM	CHD2|CHD2-42|CHD2-52	DS cell adhesion molecule	protein-coding
siCtrl_G9a_GST_peak_6505	chr7	137130915	137131149	+	104	NA	intron (NM_001321710, intron 27 of 32)	intron (NM_001321710, intron 27 of 32)	-102553	NM_001321387	5764	Hs.371249	NM_002825	ENSG00000105894	PTN	HARP|HB-GAM|HBBM|HBGF-8|HBGF8|HBNF|HBNF-1|NEGF1|OSF-1	pleiotrophin	protein-coding
siCtrl_G9a_GST_peak_6347	chr7	70040239	70040327	+	104	NA	intron (NM_015570, intron 5 of 18)	intron (NM_015570, intron 5 of 18)	-556847	NM_022479	64409	Hs.488591	NM_022479	ENSG00000185274	GALNT17	GALNACT17|GALNT16|GALNT20|GALNTL3|GalNAc-T17|GalNAc-T19|GalNAc-T5L|WBSCR17	polypeptide N-acetylgalactosaminyltransferase 17	protein-coding
siCtrl_G9a_GST_peak_5672	chr6	48258469	48258594	+	104	NA	Intergenic	Intergenic	-222106	NM_001013732	442213	Hs.659409	NM_207499	ENSG00000244694	PTCHD4	C6orf138|PTCH53|dJ402H5.2	patched domain containing 4	protein-coding
siCtrl_G9a_GST_peak_5420	chr5	143171994	143172198	+	104	NA	Intergenic	Intergenic	-19630	NM_021182	57824	Hs.158320	NM_021182	ENSG00000158497	HMHB1	HB-1|HB-1Y|HLA-HB1	histocompatibility minor HB-1	protein-coding
siCtrl_G9a_GST_peak_61	chr1	55776812	55777036	+	104	NA	Intergenic	Intergenic	85610	NR_039618	100616272		NR_039618	ENSG00000265822	MIR4422	mir-4422	microRNA 4422	ncRNA
siCtrl_G9a_GST_peak_3357	chr18	56220437	56220519	+	104	NA	intron (NM_052947, intron 4 of 12)	MLT1C|LTR|ERVL-MaLR	-47374	NR_132963	106635543		NR_132963		SNORA108	-	small nucleolar RNA, H/ACA box 108	snoRNA
siCtrl_G9a_GST_peak_1291	chr10	123056308	123056649	+	104	NA	Intergenic	Intergenic	234350	NM_001320654	2263	Hs.533683	NM_000141	ENSG00000066468	FGFR2	BBDS|BEK|BFR-1|CD332|CEK3|CFD1|ECT1|JWS|K-SAM|KGFR|TK14|TK25	fibroblast growth factor receptor 2	protein-coding
siCtrl_G9a_GST_peak_1380	chr11	20033613	20033714	+	104	NA	intron (NM_001244963, intron 12 of 39)	intron (NM_001244963, intron 12 of 39)	-10439	NM_001111019	89797	Hs.64341	NM_145117	ENSG00000166833	NAV2	HELAD1|POMFIL2|RAINB1|STEERIN2|UNC53H2	neuron navigator 2	protein-coding
siCtrl_G9a_GST_peak_4686	chr3	67342124	67342285	+	104	NA	Intergenic	Intergenic	66316	NR_036234	100422941		NR_036234	ENSG00000283298	MIR4272	-	microRNA 4272	ncRNA
siCtrl_G9a_GST_peak_5364	chr5	115856436	115856640	+	104	NA	intron (NM_020796, intron 1 of 18)	intron (NM_020796, intron 1 of 18)	-53576	NR_147170	105379132		NR_147170		SEMA6A-AS2	-	SEMA6A antisense RNA 2	ncRNA
siCtrl_G9a_GST_peak_2426	chr15	20832586	20832659	+	104	NA	Intergenic	Intergenic	64948	NR_027411	729786	Hs.592025	NR_027411	ENSG00000181984	GOLGA8CP	GOLGA8C	golgin A8 family member C, pseudogene	pseudo
siCtrl_G9a_GST_peak_5509	chr5	180721614	180721786	+	104	NA	Intergenic	AluSx1|SINE|Alu	-28807	NR_028322	100132287	Hs.446409	NR_028322		LOC100132287	-	uncharacterized LOC100132287	ncRNA
siCtrl_G9a_GST_peak_2369	chr14	70308224	70308402	+	104	NA	Intergenic	L2|LINE|L2	29836	NR_149012	100506358		NR_149012		LOC100506358	-	uncharacterized LOC100506358	ncRNA
siCtrl_G9a_GST_peak_4462	chr22	16184384	16184556	+	104	NA	intron (NR_122113, intron 6 of 7)	intron (NR_122113, intron 6 of 7)	8539	NR_122113	503637	Hs.744284	NR_122113	ENSG00000206195	DUXAP8	-	double homeobox A pseudogene 8	pseudo
siCtrl_G9a_GST_peak_4821	chr3	149146438	149146715	+	104	NA	Intergenic	MSTA|LTR|ERVL-MaLR	-45908	NM_004617	7104	Hs.133527	NM_004617	ENSG00000169903	TM4SF4	ILTMP|il-TMP	transmembrane 4 L six family member 4	protein-coding
siCtrl_G9a_GST_peak_3941	chr2	126401191	126401433	+	104	NA	Intergenic	LTR38|LTR|ERV1	474250	NR_146970	105373600	Hs.555059	NR_146970	ENSG00000226813	LINC01941	-	long intergenic non-protein coding RNA 1941	ncRNA
siCtrl_G9a_GST_peak_1495	chr11	87164843	87164922	+	104	NA	Intergenic	Intergenic	265421	NR_135090	105369423	Hs.125442	NR_135090	ENSG00000255183	LINC02711	-	long intergenic non-protein coding RNA 2711	ncRNA
siCtrl_G9a_GST_peak_466	chr1	117684456	117684590	+	104	NA	Intergenic	Intergenic	-20152	NM_025188	80263	Hs.301526	NM_025188	ENSG00000134253	TRIM45	RNF99	tripartite motif containing 45	protein-coding
siCtrl_G9a_GST_peak_1570	chr12	1392199	1392363	+	104	NA	intron (NR_027948, intron 14 of 19)	intron (NR_027948, intron 14 of 19)	-217376	NR_028415	100292680	Hs.391695	NR_028415	ENSG00000249628	LINC00942	-	long intergenic non-protein coding RNA 942	ncRNA
siCtrl_G9a_GST_peak_1542	chr11	120976375	120976712	+	104	NA	exon (NM_005422, exon 2 of 23)	exon (NM_005422, exon 2 of 23)	3168	NM_005422	7007	Hs.248162	NM_005422	ENSG00000109927	TECTA	DFNA12|DFNA8|DFNB21	tectorin alpha	protein-coding
siCtrl_G9a_GST_peak_4866	chr3	188186576	188186665	+	104	NA	intron (NM_005578, intron 3 of 10)	intron (NM_005578, intron 3 of 10)	99834	NR_046623	100873917	Hs.674993	NR_046623	ENSG00000224563	LPP-AS1	-	LPP antisense RNA 1	ncRNA
siCtrl_G9a_GST_peak_1192	chr10	77403967	77404038	+	104	NA	intron (NM_001305581, intron 2 of 6)	intron (NM_001305581, intron 2 of 6)	-3265	NR_131178	83938	Hs.118161	NM_032024	ENSG00000148655	LRMDA	C10orf11|CDA017	leucine rich melanocyte differentiation associated	protein-coding
siCtrl_G9a_GST_peak_4556	chr3	7335991	7336188	+	104	NA	intron (NM_000844, intron 2 of 9)	intron (NM_000844, intron 2 of 9)	240882	NR_046606	100873937	Hs.570608	NR_046606	ENSG00000236202	GRM7-AS1	-	GRM7 antisense RNA 1	ncRNA
siCtrl_G9a_GST_peak_2185	chr13	47117531	47117785	+	104	NA	Intergenic	Intergenic	-9647	NM_001164211	23143	Hs.507971	NM_015116	ENSG00000136141	LRCH1	CHDC1|NP81	leucine rich repeats and calponin homology domain containing 1	protein-coding
siCtrl_G9a_GST_peak_4168	chr2	223220680	223220764	+	104	NA	non-coding (NR_136642, exon 4 of 4)	non-coding (NR_136642, exon 4 of 4)	35342	NR_136641	440934	Hs.732732	NR_136638	ENSG00000237732	CT75	-	cancer/testis associated transcript 75	ncRNA
siCtrl_G9a_GST_peak_5325	chr5	81834618	81835204	+	104	NA	Intergenic	Intergenic	259630	NM_001017971	92270	Hs.676227	NM_001017971	ENSG00000205464	ATP6AP1L	-	ATPase H+ transporting accessory protein 1 like	protein-coding
siCtrl_G9a_GST_peak_1370	chr11	19392027	19392362	+	104	NA	intron (NM_001111018, intron 1 of 37)	intron (NM_001111018, intron 1 of 37)	19923	NM_001111018	89797	Hs.64341	NM_145117	ENSG00000166833	NAV2	HELAD1|POMFIL2|RAINB1|STEERIN2|UNC53H2	neuron navigator 2	protein-coding
siCtrl_G9a_GST_peak_5336	chr5	106448193	106448252	+	104	NA	Intergenic	Intergenic	-101507	NR_104671	102467213	Hs.570923	NR_104671	ENSG00000251027	LINC01950	-	long intergenic non-protein coding RNA 1950	ncRNA
siCtrl_G9a_GST_peak_6703	chr8	72044914	72044987	+	104	NA	Intergenic	Intergenic	223991	NM_172058	2138	Hs.444971	NM_000503	ENSG00000104313	EYA1	BOP|BOR|BOS1|OFC1	EYA transcriptional coactivator and phosphatase 1	protein-coding
siCtrl_G9a_GST_peak_1890	chr12	79312126	79312360	+	104	NA	intron (NM_001135805, intron 2 of 11)	intron (NM_001135805, intron 2 of 11)	53689	NM_005639	6857	Hs.310545	NM_005639	ENSG00000067715	SYT1	BAGOS|P65|SVP65|SYT	synaptotagmin 1	protein-coding
siCtrl_G9a_GST_peak_2626	chr15	71945495	71945746	+	104	NA	intron (NM_001286429, intron 1 of 11)	intron (NM_001286429, intron 1 of 11)	38258	NR_120346	101929173	Hs.680593	NR_120346		THSD4-AS2	-	THSD4 antisense RNA 2	ncRNA
siCtrl_G9a_GST_peak_3905	chr2	103443486	103443578	+	104	NA	Intergenic	Intergenic	65042	NM_144632	130827	Hs.436203	NM_144632	ENSG00000170417	TMEM182	-	transmembrane protein 182	protein-coding
siCtrl_G9a_GST_peak_2083	chr12	127013002	127013087	+	104	NA	Intergenic	MLT1A1|LTR|ERVL-MaLR	-79171	NR_147498	283435	Hs.667334	NR_147498		LINC02825	-	long intergenic non-protein coding RNA 2825	ncRNA
siCtrl_G9a_GST_peak_7031	chr9	85295128	85295303	+	104	NA	Intergenic	Intergenic	382842	NM_152573	158158	Hs.129136	NM_152573	ENSG00000165105	RASEF	RAB45	RAS and EF-hand domain containing	protein-coding
siCtrl_G9a_GST_peak_6910	chr9	18393443	18393517	+	104	NA	Intergenic	MER81|DNA|hAT-Blackjack	-80671	NM_001040272	92949	Hs.741483	NM_052866	ENSG00000178031	ADAMTSL1	ADAMTSL-1|ADAMTSR1|C9orf94|PUNCTIN	ADAMTS like 1	protein-coding
siCtrl_G9a_GST_peak_1908	chr12	87514440	87514536	+	104	NA	Intergenic	MLT1H|LTR|ERVL-MaLR	-210028	NR_135020	105369879	Hs.552351	NR_135020		LOC105369879	-	uncharacterized LOC105369879	ncRNA
siCtrl_G9a_GST_peak_5380	chr5	123462905	123462978	+	104	NA	intron (NR_125774, intron 4 of 5)	AluJr|SINE|Alu	311272	NR_125774	103724389	Hs.582211	NR_125774		LINC01170	-	long intergenic non-protein coding RNA 1170	ncRNA
siCtrl_G9a_GST_peak_5106	chr4	158576412	158576475	+	104	NA	Intergenic	Intergenic	82801	NR_026992	340017	Hs.428275	NR_026992	ENSG00000234111	LINC02433	-	long intergenic non-protein coding RNA 2433	ncRNA
siCtrl_G9a_GST_peak_4154	chr2	217600995	217601260	+	104	NA	Intergenic	Intergenic	-40855	NM_000599	3488	Hs.607212	NM_000599	ENSG00000115461	IGFBP5	IBP5	insulin like growth factor binding protein 5	protein-coding
siCtrl_G9a_GST_peak_1825	chr12	68122328	68122438	+	104	NA	intron (NR_110063, intron 1 of 4)	intron (NR_110063, intron 1 of 4)	872	NR_110063	101927901	Hs.369609	NR_110063	ENSG00000255970	LINC02421	-	long intergenic non-protein coding RNA 2421	ncRNA
siCtrl_G9a_GST_peak_4671	chr3	64337851	64338142	+	104	NA	Intergenic	Intergenic	-84147	NM_001370528	166336	Hs.148105	NM_198859	ENSG00000163637	PRICKLE2	EPM5	prickle planar cell polarity protein 2	protein-coding
siCtrl_G9a_GST_peak_4766	chr3	122384800	122384966	+	104	NA	Intergenic	MER102b|DNA|hAT-Charlie	-14803	NM_017554	54625	Hs.518203	NM_017554	ENSG00000173193	PARP14	ARTD8|BAL2|PARP-14|pART8	poly(ADP-ribose) polymerase family member 14	protein-coding
siCtrl_G9a_GST_peak_2326	chr14	46837574	46837776	+	104	NA	intron (NR_102702, intron 3 of 3)	intron (NR_102702, intron 3 of 3)	-102887	NR_102699	100506412	Hs.207545	NR_102699	ENSG00000258700	LINC00871	-	long intergenic non-protein coding RNA 871	ncRNA
siCtrl_G9a_GST_peak_6593	chr8	23765695	23766121	+	104	NA	Intergenic	Intergenic	-53589	NM_003155	6781	Hs.25590	NM_003155	ENSG00000159167	STC1	STC	stanniocalcin 1	protein-coding
siCtrl_G9a_GST_peak_3957	chr2	133843286	133843472	+	104	NA	intron (NM_207363, intron 6 of 19)	intron (NM_207363, intron 6 of 19)	170249	NR_135572	101928185	Hs.680114	NR_135572	ENSG00000233729	NCKAP5-AS1	-	NCKAP5 antisense RNA 1	ncRNA
siCtrl_G9a_GST_peak_5479	chr5	168320304	168320502	+	104	NA	intron (NM_001271946, intron 4 of 35)	intron (NM_001271946, intron 4 of 35)	-119829	NR_109897	728095	Hs.145601	NR_109897		LOC728095	-	uncharacterized LOC728095	ncRNA
siCtrl_G9a_GST_peak_5487	chr5	168433056	168433156	+	104	NA	intron (NM_001271946, intron 4 of 35)	L2b|LINE|L2	-7126	NR_109897	728095	Hs.145601	NR_109897		LOC728095	-	uncharacterized LOC728095	ncRNA
siCtrl_G9a_GST_peak_7155	chrX	2280852	2281255	+	104	NA	intron (NM_145177, intron 3 of 6)	intron (NM_145177, intron 3 of 6)	137527	NM_001171135	9189	Hs.131452	NM_004729	ENSG00000214717	ZBED1	ALTE|DREF|TRAMP|hDREF	zinc finger BED-type containing 1	protein-coding
siCtrl_G9a_GST_peak_3277	chr18	1412580	1412712	+	104	NA	Intergenic	Intergenic	-53016	NR_023927	56651	Hs.541165	NM_031416		LINC00470	C18orf2	long intergenic non-protein coding RNA 470	ncRNA
siCtrl_G9a_GST_peak_6195	chr7	31732209	31732372	+	104	NA	intron (NM_001145123, intron 2 of 3)	intron (NM_001145123, intron 2 of 3)	5461	NM_006658	10842	Hs.227011	NM_006658	ENSG00000106341	PPP1R17	C7orf16|GSBS	protein phosphatase 1 regulatory subunit 17	protein-coding
siCtrl_G9a_GST_peak_6856	chr8	139756023	139756082	+	104	NA	intron (NM_152888, intron 22 of 64)	intron (NM_152888, intron 22 of 64)	170232	NM_152888	169044	Hs.117169	NM_152888	ENSG00000169436	COL22A1	-	collagen type XXII alpha 1 chain	protein-coding
siCtrl_G9a_GST_peak_4904	chr4	20338782	20339052	+	104	NA	intron (NM_001289136, intron 4 of 35)	THE1B|LTR|ERVL-MaLR	-54895	NR_037876	100505893	Hs.665305	NR_037876	ENSG00000248228	SLIT2-IT1	-	SLIT2 intronic transcript 1	ncRNA
siCtrl_G9a_GST_peak_4942	chr4	47932840	47933053	+	104	NA	intron (NR_125879, intron 1 of 2)	intron (NR_125879, intron 1 of 2)	-16262	NM_001278623	152518	Hs.646325	NM_152995	ENSG00000170448	NFXL1	CDZFP|HOZFP|OZFP|URCC5	nuclear transcription factor, X-box binding like 1	protein-coding
siCtrl_G9a_GST_peak_1212	chr10	84079465	84079579	+	104	NA	intron (NM_001370082, intron 3 of 10)	intron (NM_001370082, intron 3 of 10)	-86846	NR_120666	101929590	Hs.733268	NR_120666	ENSG00000225738	NRG3-AS1	C10orf100|Em:AC010157.1	NRG3 antisense RNA 1	ncRNA
siCtrl_G9a_GST_peak_1281	chr10	119867927	119867986	+	104	NA	intron (NR_026940, intron 3 of 3)	intron (NR_026940, intron 3 of 3)	-61504	NM_014904	22841	Hs.173656	NM_014904	ENSG00000107560	RAB11FIP2	Rab11-FIP2|nRip11	RAB11 family interacting protein 2	protein-coding
siCtrl_G9a_GST_peak_2492	chr15	46608444	46608628	+	104	NA	Intergenic	Intergenic	611143	NR_135680	105370802	Hs.447522	NR_135680	ENSG00000259200	LOC105370802	-	uncharacterized LOC105370802	ncRNA
siCtrl_G9a_GST_peak_4172	chr2	223426754	223426865	+	104	NA	3' UTR (NM_001320834, exon 5 of 5)	3' UTR (NM_001320834, exon 5 of 5)	94002	NR_130154	10056	Hs.471452	NM_005687	ENSG00000116120	FARSB	FARSLB|FRSB|HSPC173|NEDBLLA|PheHB|PheRS|RILDBC	phenylalanyl-tRNA synthetase subunit beta	protein-coding
siCtrl_G9a_GST_peak_2700	chr15	88565811	88566198	+	104	NA	intron (NM_001007156, intron 14 of 15)	intron (NM_001007156, intron 14 of 15)	-76505	NR_162119	113218493		NR_162119		MIR11181	-	microRNA 11181	ncRNA
siCtrl_G9a_GST_peak_2561	chr15	58784994	58785355	+	104	NA	intron (NR_120338, intron 2 of 2)	intron (NR_120338, intron 2 of 2)	5760	NR_120338	101928694	Hs.655781	NR_120338	ENSG00000259293	LIPC-AS1	-	LIPC antisense RNA 1	ncRNA
siCtrl_G9a_GST_peak_2502	chr15	47875859	47875935	+	104	NA	intron (NM_001198999, intron 3 of 19)	intron (NM_001198999, intron 3 of 19)	-133805	NM_001358351	80031	Hs.511265	NM_020858	ENSG00000137872	SEMA6D	-	semaphorin 6D	protein-coding
siCtrl_G9a_GST_peak_6713	chr8	73685369	73685476	+	104	NA	intron (NM_004770, intron 2 of 2)	intron (NM_004770, intron 2 of 2)	41142	NR_110656	101926908	Hs.680588	NR_110656	ENSG00000253726	LOC101926908	-	uncharacterized LOC101926908	ncRNA
siCtrl_G9a_GST_peak_228	chr1	70114156	70114378	+	104	NA	intron (NM_001366842, intron 1 of 7)	LTR33A_|LTR|ERVL	79243	NM_001366842	57554	Hs.479658	NM_020794	ENSG00000033122	LRRC7	DENSIN	leucine rich repeat containing 7	protein-coding
siCtrl_G9a_GST_peak_2229	chr13	73064068	73064213	+	104	NA	Intergenic	Intergenic	237627	NM_001071775	440145	Hs.28465	NM_001071775	ENSG00000204899	MZT1	C13orf37|MOZART1	mitotic spindle organizing protein 1	protein-coding
siCtrl_G9a_GST_peak_5454	chr5	159982769	159982971	+	104	NA	Intergenic	Intergenic	70511	NR_029701	406938		NR_029701	ENSG00000283733	MIR146A	MIRN146|MIRN146A|miR-146a|miRNA146A	microRNA 146a	ncRNA
siCtrl_G9a_GST_peak_2203	chr13	51375609	51375832	+	104	NA	intron (NM_198989, intron 1 of 1)	intron (NM_198989, intron 1 of 1)	-6271	NR_046551	100874074	Hs.734030	NR_046551	ENSG00000176124	DLEU7-AS1	-	DLEU7 antisense RNA 1	ncRNA
siCtrl_G9a_GST_peak_5557	chr6	14518828	14519067	+	104	NA	Intergenic	Intergenic	-233262	NR_108096	102216342	Hs.563409	NR_108096	ENSG00000226673	LINC01108	LncRNA-ES1	long intergenic non-protein coding RNA 1108	ncRNA
siCtrl_G9a_GST_peak_5531	chr6	6407454	6407513	+	104	NA	intron (NR_026970, intron 4 of 7)	intron (NR_026970, intron 4 of 7)	-86559	NM_000129	2162	Hs.335513	NM_000129	ENSG00000124491	F13A1	F13A	coagulation factor XIII A chain	protein-coding
siCtrl_G9a_GST_peak_1385	chr11	22579665	22579724	+	104	NA	Intergenic	Intergenic	-66129	NR_120583	102723378	Hs.374255	NR_120583	ENSG00000255323	LINC01495	-	long intergenic non-protein coding RNA 1495	ncRNA
siCtrl_G9a_GST_peak_1565	chr11	134721879	134721957	+	104	NA	Intergenic	Intergenic	116079	NR_147836	729305	Hs.148365	NR_147836	ENSG00000251226	LINC02714	-	long intergenic non-protein coding RNA 2714	ncRNA
siCtrl_G9a_GST_peak_5831	chr6	106140094	106140153	+	104	NA	Intergenic	Intergenic	-289166	NM_002726	5550	Hs.436564	NM_002726	ENSG00000085377	PREP	PE|PEP	prolyl endopeptidase	protein-coding
siCtrl_G9a_GST_peak_5001	chr4	53862834	53863071	+	104	NA	intron (NM_152540, intron 5 of 8)	intron (NM_152540, intron 5 of 8)	134468	NM_023940	65997	Hs.8035	NM_023940	ENSG00000128045	RASL11B	-	RAS like family 11 member B	protein-coding
siCtrl_G9a_GST_peak_5067	chr4	113959715	113959974	+	104	NA	intron (NM_001354249, intron 2 of 44)	MLT1G1|LTR|ERVL-MaLR	-10726	NM_001354245	287	Hs.620557	NM_001148	ENSG00000145362	ANK2	ANK-2|LQT4|brank-2	ankyrin 2	protein-coding
siCtrl_G9a_GST_peak_5804	chr6	101925295	101925425	+	104	NA	intron (NM_001166247, intron 1 of 16)	intron (NM_001166247, intron 1 of 16)	78499	NM_021956	2898	Hs.98262	NM_021956	ENSG00000164418	GRIK2	EAA4|GLR6|GLUK6|GLUR6|GluK2|MRT6	glutamate ionotropic receptor kainate type subunit 2	protein-coding
siCtrl_G9a_GST_peak_4333	chr20	43810662	43810771	+	104	NA	Intergenic	Intergenic	7173	NM_002638	5266	Hs.112341	NM_002638	ENSG00000124102	PI3	ESI|SKALP|WAP3|WFDC14|cementoin	peptidase inhibitor 3	protein-coding
siCtrl_G9a_GST_peak_4222	chr20	7552325	7552400	+	104	NA	Intergenic	Intergenic	200107	NR_107029	102465865		NR_107029	ENSG00000278159	MIR8062	hsa-mir-8062	microRNA 8062	ncRNA
siCtrl_G9a_GST_peak_4588	chr3	18380706	18380797	+	104	NA	Intergenic	Intergenic	86080	NM_001195470	6304	Hs.517717	NM_002971	ENSG00000182568	SATB1	-	SATB homeobox 1	protein-coding
siCtrl_G9a_GST_peak_2395	chr14	87466403	87466711	+	104	NA	Intergenic	MLT1A1|LTR|ERVL-MaLR	94435	NR_038445	283585	Hs.381998	NR_038445	ENSG00000258804	LINC01148	-	long intergenic non-protein coding RNA 1148	ncRNA
siCtrl_G9a_GST_peak_5275	chr5	63918561	63918620	+	104	NA	Intergenic	LTR16A1|LTR|ERVL	47113	NM_001271890	401190	Hs.657133	NM_001029875	ENSG00000186479	RGS7BP	R7BP	regulator of G protein signaling 7 binding protein	protein-coding
siCtrl_G9a_GST_peak_5763	chr6	88956789	88956855	+	104	NA	Intergenic	MER5B|DNA|hAT-Charlie	-79754	NM_001370547	1268	Hs.75110	NM_016083	ENSG00000118432	CNR1	CANN6|CB-R|CB1|CB1A|CB1K5|CB1R|CNR	cannabinoid receptor 1	protein-coding
siCtrl_G9a_GST_peak_1768	chr12	63097335	63097412	+	104	NA	intron (NM_020700, intron 6 of 9)	intron (NM_020700, intron 6 of 9)	99907	NR_029661	406891		NR_029661	ENSG00000199179	MIRLET7I	LET7I|MIRNLET7I|hsa-let-7i|let-7i	microRNA let-7i	ncRNA
siCtrl_G9a_GST_peak_4639	chr3	41027246	41027377	+	104	NA	Intergenic	LTR16A2|LTR|ERVL	-213685	NM_001098209	1499	Hs.476018	NM_001904	ENSG00000168036	CTNNB1	CTNNB|EVR7|MRD19|NEDSDV|armadillo	catenin beta 1	protein-coding
siCtrl_G9a_GST_peak_5742	chr6	78165967	78166245	+	104	NA	Intergenic	Intergenic	7633	NM_000863	3351	Hs.123016	NM_000863	ENSG00000135312	HTR1B	5-HT-1B|5-HT-1D-beta|5-HT1B|5-HT1DB|HTR1D2|HTR1DB|S12	5-hydroxytryptamine receptor 1B	protein-coding
siCtrl_G9a_GST_peak_5484	chr5	168430806	168430920	+	104	NA	intron (NM_001271946, intron 4 of 35)	intron (NM_001271946, intron 4 of 35)	-9369	NR_109897	728095	Hs.145601	NR_109897		LOC728095	-	uncharacterized LOC728095	ncRNA
siCtrl_G9a_GST_peak_4909	chr4	24065316	24065387	+	104	NA	intron (NM_001330752, intron 2 of 13)	intron (NM_001330752, intron 2 of 13)	-173681	NM_001354828	10891	Hs.527078	NM_013261	ENSG00000109819	PPARGC1A	LEM6|PGC-1(alpha)|PGC-1alpha|PGC-1v|PGC1|PGC1A|PPARGC1	PPARG coactivator 1 alpha	protein-coding
siCtrl_G9a_GST_peak_6367	chr7	81720566	81720778	+	104	NA	intron (NM_001302890, intron 6 of 10)	intron (NM_001302890, intron 6 of 10)	82179	NR_110076	101927356	Hs.571348	NR_110076	ENSG00000223770	LOC101927356	-	uncharacterized LOC101927356	ncRNA
siCtrl_G9a_GST_peak_1071	chr10	9286946	9287097	+	104	NA	intron (NR_120635, intron 4 of 4)	L1MEc|LINE|L1	-30555	NR_108039	100507163	Hs.649223	NR_108039		LINC00709	-	long intergenic non-protein coding RNA 709	ncRNA
siCtrl_G9a_GST_peak_4922	chr4	36711781	36711953	+	104	NA	Intergenic	Intergenic	-68345	NR_149124	105374400	Hs.570781	NR_149124	ENSG00000248215	LINC02505	-	long intergenic non-protein coding RNA 2505	ncRNA
siCtrl_G9a_GST_peak_4850	chr3	170356770	170356930	+	104	NA	intron (NR_135556, intron 2 of 5)	intron (NR_135556, intron 2 of 5)	-52986	NM_020949	57709	Hs.596660	NM_020949	ENSG00000013293	SLC7A14	PPP1R142	solute carrier family 7 member 14	protein-coding
siCtrl_G9a_GST_peak_1154	chr10	54381625	54381775	+	104	NA	intron (NR_155748, intron 1 of 2)	intron (NR_155748, intron 1 of 2)	133464	NR_155748	105378305	Hs.257871	NR_155748		LOC105378305	-	uncharacterized LOC105378305	ncRNA
siCtrl_G9a_GST_peak_2815	chr16	25626200	25626309	+	104	NA	Intergenic	Intergenic	-77026	NM_006040	9951	Hs.655275	NM_006040	ENSG00000182601	HS3ST4	3-OST-4|30ST4|3OST4|h3-OST-4	heparan sulfate-glucosamine 3-sulfotransferase 4	protein-coding
siCtrl_G9a_GST_peak_2289	chr13	104504562	104504631	+	104	NA	Intergenic	Intergenic	427046	NR_126374	104326190	Hs.334381	NR_126374	ENSG00000234551	LINC01309	TCONS_l2_00007459	long intergenic non-protein coding RNA 1309	ncRNA
siCtrl_G9a_GST_peak_6286	chr7	51590552	51590617	+	104	NA	Intergenic	Intergenic	-129631	NR_157843	107986794		NR_157843		LOC107986794	-	uncharacterized LOC107986794	ncRNA
siCtrl_G9a_GST_peak_1321	chr10	132619415	132619492	+	104	NA	Intergenic	Intergenic	141478	NR_036180	100422867		NR_036180	ENSG00000264803	MIR378C	mir-378c	microRNA 378c	ncRNA
siCtrl_G9a_GST_peak_4783	chr3	124318730	124319041	+	104	NA	intron (NM_001322998, intron 1 of 14)	intron (NM_001322998, intron 1 of 14)	15379	NM_001322996	8997	Hs.8004	NM_003947	ENSG00000160145	KALRN	ARHGEF24|CHD5|CHDS5|DUET|DUO|HAPIP|TRAD	kalirin RhoGEF kinase	protein-coding
siCtrl_G9a_GST_peak_6479	chr7	134539717	134539963	+	104	NA	intron (NM_033138, intron 2 of 14)	MSTA|LTR|ERVL-MaLR	-36311	NM_033139	800	Hs.490203	NM_004342	ENSG00000122786	CALD1	CDM|H-CAD|HCAD|L-CAD|LCAD|NAG22	caldesmon 1	protein-coding
siCtrl_G9a_GST_peak_1608	chr12	15328814	15328874	+	104	NA	intron (NM_032918, intron 2 of 4)	L1MB8|LINE|L1	23987	NR_046559	100873980	Hs.569154	NR_046559	ENSG00000255660	RERG-AS1	-	RERG antisense RNA 1	ncRNA
siCtrl_G9a_GST_peak_1046	chr1	242592202	242592345	+	104	NA	intron (NM_001320272, intron 2 of 10)	intron (NM_001320272, intron 2 of 10)	20497	NM_001195812	200150	Hs.672452	NM_152666	ENSG00000180287	PLD5	PLDC	phospholipase D family member 5	protein-coding
siCtrl_G9a_GST_peak_1494	chr11	84756153	84756212	+	104	NA	intron (NM_001351274, intron 5 of 26)	LTR79|LTR|ERVL	-121717	NM_001364	1740	Hs.367656	NM_001364	ENSG00000150672	DLG2	PPP1R58|PSD-93|PSD93|chapsyn-110	discs large MAGUK scaffold protein 2	protein-coding
siCtrl_G9a_GST_peak_856	chr1	213405442	213405524	+	104	NA	exon (NM_001287218, exon 10 of 15)	exon (NM_001287218, exon 10 of 15)	180900	NM_012424	26750	Hs.591416	NM_012424	ENSG00000136643	RPS6KC1	RPK118|RSKL1|S6K-delta-1|S6PKh1|humS6PKh1	ribosomal protein S6 kinase C1	protein-coding
siCtrl_G9a_GST_peak_6380	chr7	94250382	94250499	+	104	NA	intron (NM_001346715, intron 5 of 10)	intron (NM_001346715, intron 5 of 10)	35005	NM_001301139	8910	Hs.371199	NM_003919	ENSG00000127990	SGCE	DYT11|ESG|epsilon-SG	sarcoglycan epsilon	protein-coding
siCtrl_G9a_GST_peak_6477	chr7	133689690	133689791	+	104	NA	exon (NM_021807, exon 16 of 18)	exon (NM_021807, exon 16 of 18)	-122353	NM_001365700	136332	Hs.149774	NM_144648	ENSG00000155530	LRGUK	CFAP246	leucine rich repeats and guanylate kinase domain containing	protein-coding
siCtrl_G9a_GST_peak_1088	chr10	18369993	18370054	+	104	NA	Intergenic	Intergenic	-59330	NM_201572	783	Hs.59093	NM_000724	ENSG00000165995	CACNB2	CACNLB2|CAVB2|MYSB	calcium voltage-gated channel auxiliary subunit beta 2	protein-coding
siCtrl_G9a_GST_peak_3483	chr2	6890687	6890951	+	104	NA	intron (NR_038369, intron 1 of 5)	MIRc|SINE|MIR	19623	NR_038369	400941	Hs.446195	NM_001001695	ENSG00000205837	LINC00487	-	long intergenic non-protein coding RNA 487	ncRNA
siCtrl_G9a_GST_peak_2277	chr13	99611868	99611949	+	104	NA	intron (NM_015296, intron 1 of 55)	intron (NM_015296, intron 1 of 55)	18410	NM_001366683	23348	Hs.596105	NM_015296	ENSG00000088387	DOCK9	ZIZ1|ZIZIMIN1	dedicator of cytokinesis 9	protein-coding
siCtrl_G9a_GST_peak_2802	chr16	18359136	18359275	+	104	NA	Intergenic	LTR16B2|LTR|ERVL	67314	NM_001282507	101059938	Hs.634612	NM_001282507	ENSG00000214967	NPIPA7	NPIPA8	nuclear pore complex interacting protein family member A7	protein-coding
siCtrl_G9a_GST_peak_4090	chr2	204925844	204925905	+	104	NA	Intergenic	Intergenic	124403	NM_012092	29851	Hs.56247	NM_012092	ENSG00000163600	ICOS	AILIM|CD278|CVID1	inducible T cell costimulator	protein-coding
siCtrl_G9a_GST_peak_5436	chr5	151926860	151926977	+	104	NA	Intergenic	Intergenic	-142078	NM_020167	56923	Hs.731911	NM_020167	ENSG00000132911	NMUR2	FM-4|FM4|NMU-R2|NMU2R|TGR-1|TGR1	neuromedin U receptor 2	protein-coding
siCtrl_G9a_GST_peak_4435	chr21	39420577	39420656	+	104	NA	Intergenic	Intergenic	72838	NR_147130	10281	Hs.23251	NM_005867	ENSG00000184029	DSCR4	DCRB|DSCRB	Down syndrome critical region 4	ncRNA
siCtrl_G9a_GST_peak_6911	chr9	18393610	18393851	+	104	NA	Intergenic	Intergenic	-80421	NM_001040272	92949	Hs.741483	NM_052866	ENSG00000178031	ADAMTSL1	ADAMTSL-1|ADAMTSR1|C9orf94|PUNCTIN	ADAMTS like 1	protein-coding
siCtrl_G9a_GST_peak_5316	chr5	75358158	75358268	+	104	NA	Intergenic	MLT1A1|LTR|ERVL-MaLR	-20995	NM_001297716	22987	Hs.646953	NM_014979	ENSG00000122012	SV2C	-	synaptic vesicle glycoprotein 2C	protein-coding
siCtrl_G9a_GST_peak_1919	chr12	92537952	92538127	+	104	NA	exon (NM_001731, exon 2 of 2)	exon (NM_001731, exon 2 of 2)	-1432	NR_132341	256021	Hs.651357	NM_001256373	ENSG00000257242	LINC01619	C12orf79	long intergenic non-protein coding RNA 1619	ncRNA
siCtrl_G9a_GST_peak_3158	chr17	62195861	62196106	+	104	NA	intron (NM_001433, intron 1 of 21)	intron (NM_001433, intron 1 of 21)	11521	NM_001433	2081	Hs.133982	NM_001433	ENSG00000178607	ERN1	IRE1|IRE1P|IRE1a|hIRE1p	endoplasmic reticulum to nucleus signaling 1	protein-coding
siCtrl_G9a_GST_peak_1044	chr1	242477360	242477688	+	104	NA	intron (NM_152666, intron 3 of 10)	MamRep605|Unknown|Unknown	135246	NM_001195812	200150	Hs.672452	NM_152666	ENSG00000180287	PLD5	PLDC	phospholipase D family member 5	protein-coding
siCtrl_G9a_GST_peak_2781	chr16	6116838	6116918	+	104	NA	intron (NM_018723, intron 1 of 15)	intron (NM_018723, intron 1 of 15)	47174	NM_001308117	54715	Hs.459842	NM_018723	ENSG00000078328	RBFOX1	2BP1|A2BP1|FOX-1|FOX1|HRNBP1	RNA binding fox-1 homolog 1	protein-coding
siCtrl_G9a_GST_peak_6747	chr8	92674566	92674725	+	104	NA	Intergenic	MER47B|DNA|TcMar-Tigger	355263	NM_175636	862	Hs.368431	NM_004349	ENSG00000079102	RUNX1T1	AML1-MTG8|AML1T1|CBFA2T1|CDR|ETO|MTG8|ZMYND2	RUNX1 partner transcriptional co-repressor 1	protein-coding
siCtrl_G9a_GST_peak_3980	chr2	138644110	138644180	+	104	NA	intron (NR_120402, intron 2 of 2)	MER54A|LTR|ERVL	41357	NR_120402	101928273	Hs.560928	NR_120402		LOC101928273	-	uncharacterized LOC101928273	ncRNA
siCtrl_G9a_GST_peak_20	chr1	19049726	19049962	+	104	NA	intron (NM_001135254, intron 7 of 8)	intron (NM_001135254, intron 7 of 8)	92504	NM_002584	5081	Hs.113253	NM_002584	ENSG00000009709	PAX7	HUP1|PAX7B|RMS2	paired box 7	protein-coding
siCtrl_G9a_GST_peak_4179	chr2	225854368	225854427	+	104	NA	intron (NM_014689, intron 1 of 55)	intron (NM_014689, intron 1 of 55)	-7253	NM_001363762	55619	Hs.46578	NM_014689	ENSG00000135905	DOCK10	DRIP2|Nbla10300|ZIZ3	dedicator of cytokinesis 10	protein-coding
siCtrl_G9a_GST_peak_4851	chr3	170357036	170357291	+	104	NA	intron (NR_135556, intron 2 of 5)	intron (NR_135556, intron 2 of 5)	-53299	NM_020949	57709	Hs.596660	NM_020949	ENSG00000013293	SLC7A14	PPP1R142	solute carrier family 7 member 14	protein-coding
siCtrl_G9a_GST_peak_5123	chr4	171745098	171745157	+	104	NA	Intergenic	THE1D|LTR|ERVL-MaLR	-80241	NR_134683	100506107	Hs.380602	NR_134683	ENSG00000250968	LINC02382	-	long intergenic non-protein coding RNA 2382	ncRNA
siCtrl_G9a_GST_peak_7160	chrX	8021414	8021546	+	104	NA	Intergenic	MER58A|DNA|hAT-Charlie	-73526	NR_030380	723779		NR_030380	ENSG00000207628	MIR651	MIRN651|hsa-mir-651|mir-651	microRNA 651	ncRNA
siCtrl_G9a_GST_peak_5166	chr5	4731547	4731677	+	104	NA	Intergenic	FLAM_A|SINE|Alu	-41982	NR_104619	101929153	Hs.385526	NR_104619	ENSG00000249521	LINC02114	-	long intergenic non-protein coding RNA 2114	ncRNA
siCtrl_G9a_GST_peak_6463	chr7	132294606	132294669	+	104	NA	intron (NM_181775, intron 2 of 4)	intron (NM_181775, intron 2 of 4)	-33314	NM_020911	91584	Hs.511454	NM_020911	ENSG00000221866	PLXNA4	FAYV2820|PLEXA4|PLXNA4A|PLXNA4B|PRO34003	plexin A4	protein-coding
siCtrl_G9a_GST_peak_7046	chr9	90462813	90462991	+	104	NA	TTS (NR_033405)	TTS (NR_033405)	3242	NR_033405	1518	Hs.726015	NR_033405		CTSLP8	CTSL1P8	cathepsin L pseudogene 8	pseudo
siCtrl_G9a_GST_peak_3903	chr2	102112583	102112698	+	104	NA	Intergenic	AluSc|SINE|Alu	-21066	NM_001367509	731220	Hs.662488	NM_207403	ENSG00000196460	RFX8	-	RFX family member 8, lacking RFX DNA binding domain	protein-coding
siCtrl_G9a_GST_peak_1225	chr10	86747106	86747179	+	104	NA	Intergenic	MLT1C|LTR|ERVL-MaLR	211519	NR_120668	101929624	Hs.588831	NR_120667	ENSG00000237267	LINC01519	-	long intergenic non-protein coding RNA 1519	ncRNA
siCtrl_G9a_GST_peak_707	chr1	187614868	187615078	+	104	NA	Intergenic	Intergenic	202213	NR_132374	106144535	Hs.568709	NR_132374		LINC01037	-	long intergenic non-protein coding RNA 1037	ncRNA
siCtrl_G9a_GST_peak_3351	chr18	53097522	53097819	+	104	NA	intron (NM_001369572, intron 5 of 19)	intron (NM_001369572, intron 5 of 19)	-8142	NM_001243233	6925	Hs.605153	NM_003199	ENSG00000196628	TCF4	E2-2|FECD3|ITF-2|ITF2|PTHS|SEF-2|SEF2|SEF2-1|SEF2-1A|SEF2-1B|SEF2-1D|TCF-4|bHLHb19	transcription factor 4	protein-coding
siCtrl_G9a_GST_peak_6999	chr9	72746021	72746081	+	104	NA	intron (NM_001347990, intron 6 of 11)	MLT1A0|LTR|ERVL-MaLR	44753	NR_040076	100507244	Hs.556816	NR_040076	ENSG00000204706	MAMDC2-AS1	-	MAMDC2 antisense RNA 1	ncRNA
siCtrl_G9a_GST_peak_5956	chr6	134980438	134980497	+	104	NA	Intergenic	LTR5_Hs|LTR|ERVK	-119324	NR_125855	101928304	Hs.555076	NR_125855		LOC101928304	-	uncharacterized LOC101928304	ncRNA
siCtrl_G9a_GST_peak_4157	chr2	217919508	217919734	+	104	NA	Intergenic	Intergenic	184126	NR_130782	101928327	Hs.350698	NR_130782	ENSG00000223874	LINC01921	-	long intergenic non-protein coding RNA 1921	ncRNA
siCtrl_G9a_GST_peak_2353	chr14	59179271	59179344	+	104	NA	Intergenic	L2b|LINE|L2	73752	NR_046095	51339	Hs.48950	NM_016651	ENSG00000165617	DACT1	DAPPER|DAPPER1|DPR1|FRODO|HDPR1|TBS2|THYEX3	dishevelled binding antagonist of beta catenin 1	protein-coding
siCtrl_G9a_GST_peak_5945	chr6	133452584	133452652	+	104	NA	Intergenic	Intergenic	43399	NR_026969	285735	Hs.407549	NM_001037231		LINC00326	NCRNA00326	long intergenic non-protein coding RNA 326	ncRNA
siCtrl_G9a_GST_peak_5294	chr5	72050612	72050671	+	104	NA	Intergenic	LTR16D|LTR|ERVL	-61777	NM_002270	3842	Hs.482497	NM_002270	ENSG00000083312	TNPO1	IPO2|KPNB2|MIP|MIP1|TRN	transportin 1	protein-coding
siCtrl_G9a_GST_peak_1387	chr11	22818622	22818848	+	104	NA	intron (NM_001351224, intron 8 of 8)	intron (NM_001351224, intron 8 of 8)	32190	NR_135213	258010	Hs.349096	NM_148893	ENSG00000198168	SVIP	-	small VCP interacting protein	protein-coding
siCtrl_G9a_GST_peak_5862	chr6	112350604	112350663	+	104	NA	Intergenic	Intergenic	-24645	NM_003880	8838	Hs.558428	NM_003880	ENSG00000112761	CCN6	LIBC|PPAC|PPD|WISP-3|WISP3	cellular communication network factor 6	protein-coding
siCtrl_G9a_GST_peak_3851	chr2	82554842	82555022	+	104	NA	Intergenic	MLT1I|LTR|ERVL-MaLR	-528995	NR_033423	1720	Hs.169235	NR_033423		DHFRP3	-	dihydrofolate reductase pseudogene 3	pseudo
siCtrl_G9a_GST_peak_3219	chr17	70775141	70775209	+	104	NA	intron (NM_001352691, intron 7 of 10)	intron (NM_001352691, intron 7 of 10)	-138564	NR_033876	400619	Hs.447555	NR_033876	ENSG00000227036	LINC00511	LCAL5|onco-lncRNA-12	long intergenic non-protein coding RNA 511	ncRNA
siCtrl_G9a_GST_peak_4079	chr2	202561200	202561276	+	104	NA	intron (NM_033066, intron 1 of 21)	intron (NM_033066, intron 1 of 21)	2129	NM_033066	58538	Hs.63085	NM_033066	ENSG00000082126	MPP4	ALS2CR5|DLG6	membrane palmitoylated protein 4	protein-coding
siCtrl_G9a_GST_peak_6721	chr8	80211939	80212106	+	104	NA	Intergenic	MER70A|LTR|ERVL	-32401	NR_162137	113219456		NR_162137		MIR12123	-	microRNA 12123	ncRNA
siCtrl_G9a_GST_peak_1341	chr11	11096666	11096831	+	104	NA	Intergenic	Intergenic	216984	NR_034137	729013	Hs.726427	NR_034137	ENSG00000247271	ZBED5-AS1	-	ZBED5 antisense RNA 1	ncRNA
siCtrl_G9a_GST_peak_1638	chr12	23444009	23444187	+	104	NA	Intergenic	MamGypLTR3|LTR|Gypsy	115528	NR_120471	101928441	Hs.129111	NR_120471	ENSG00000256321	LOC101928441	-	uncharacterized LOC101928441	ncRNA
siCtrl_G9a_GST_peak_7061	chr9	98619195	98619467	+	104	NA	intron (NR_023390, intron 1 of 2)	intron (NR_023390, intron 1 of 2)	-18642	NM_020207	375748	Hs.432364	NM_020207	ENSG00000182150	ERCC6L2	BMFS2|C9orf102|RAD26L|SR278	ERCC excision repair 6 like 2	protein-coding
siCtrl_G9a_GST_peak_5057	chr4	96460254	96460313	+	104	NA	intron (NM_003728, intron 1 of 15)	intron (NM_003728, intron 1 of 15)	9841	NM_003728	8633	Hs.388565	NM_003728	ENSG00000182168	UNC5C	UNC5H3	unc-5 netrin receptor C	protein-coding
siCtrl_G9a_GST_peak_6289	chr7	53552550	53552676	+	104	NA	Intergenic	MLT1A0|LTR|ERVL-MaLR	327011	NR_038371	401337	Hs.531378	NM_001001707	ENSG00000205628	LINC01446	GS1-179L18.1	long intergenic non-protein coding RNA 1446	ncRNA
siCtrl_G9a_GST_peak_6033	chr6	156349519	156349790	+	104	NA	Intergenic	Intergenic	81723	NR_031606	100302259		NR_031606	ENSG00000221456	MIR1202	MIRN1202|hsa-mir-1202	microRNA 1202	ncRNA
siCtrl_G9a_GST_peak_1914	chr12	89033367	89033426	+	104	NA	Intergenic	Intergenic	-59146	NM_003994	4254	Hs.1048	NM_000899	ENSG00000049130	KITLG	DCUA|DFNA69|FPH2|FPHH|KL-1|Kitl|MGF|SCF|SF|SHEP7|SLF	KIT ligand	protein-coding
siCtrl_G9a_GST_peak_5750	chr6	81076582	81076682	+	104	NA	Intergenic	Intergenic	260244	NR_134945	594	Hs.156414	NM_000056	ENSG00000083123	BCKDHB	BCKDE1B|BCKDH E1-beta|E1B	branched chain keto acid dehydrogenase E1 subunit beta	protein-coding
siCtrl_G9a_GST_peak_3996	chr2	153393824	153393883	+	104	NA	intron (NM_052905, intron 2 of 25)	intron (NM_052905, intron 2 of 25)	180122	NM_001365599	55660	Hs.643580	NM_017892	ENSG00000196504	PRPF40A	FBP-11|FBP11|FLAF1|FNBP3|HIP-10|HIP10|HYPA|NY-REN-6|Prp40	pre-mRNA processing factor 40 homolog A	protein-coding
siCtrl_G9a_GST_peak_5307	chr5	73600437	73600539	+	104	NA	Intergenic	Intergenic	3662	NR_105009	102503429	Hs.519391	NR_105009	ENSG00000248942	LINC01335	-	long intergenic non-protein coding RNA 1335	ncRNA
siCtrl_G9a_GST_peak_6539	chr7	153841949	153842083	+	104	NA	intron (NM_001290253, intron 1 of 5)	MLT1B|LTR|ERVL-MaLR	-84361	NR_136254	101929998	Hs.689473	NR_136254		LOC101929998	-	uncharacterized LOC101929998	ncRNA
siCtrl_G9a_GST_peak_4860	chr3	177552504	177552782	+	104	NA	intron (NR_110826, intron 1 of 2)	intron (NR_110826, intron 1 of 2)	17990	NR_110826	102724550	Hs.570526	NR_110826	ENSG00000231574	LINC02015	KCCAT211	long intergenic non-protein coding RNA 2015	ncRNA
siCtrl_G9a_GST_peak_5099	chr4	147141951	147142010	+	104	NA	intron (NM_001371071, intron 2 of 6)	MLT1L|LTR|ERVL-MaLR	6290	NM_001371071
siCtrl_G9a_GST_peak_7311	chrY	2709561	2709646	+	104	NA	promoter-TSS (NM_001008)	promoter-TSS (NM_001008)	-40	NM_001008	6192	Hs.282376	NM_001008	ENSG00000129824	RPS4Y1	RPS4Y|S4	ribosomal protein S4 Y-linked 1	protein-coding
siCtrl_G9a_GST_peak_5207	chr5	17626354	17626485	+	104	NA	Intergenic	Intergenic	29328	NM_001355258	391769		NM_001355258	ENSG00000269466	H3.Y	-	histone cluster 2, H3c pseudogene	protein-coding
siCtrl_G9a_GST_peak_5998	chr6	146170023	146170150	+	104	NA	intron (NR_038246, intron 2 of 2)	LTR16B1|LTR|ERVL	34074	NR_038245	100507557	Hs.124537	NR_038244	ENSG00000235652	LOC100507557	-	uncharacterized LOC100507557	ncRNA
siCtrl_G9a_GST_peak_6256	chr7	42390593	42390661	+	104	NA	Intergenic	Intergenic	-113819	NM_000168	2737	Hs.21509	NM_000168	ENSG00000106571	GLI3	ACLS|GCPS|GLI3-190|GLI3FL|PAP-A|PAPA|PAPA1|PAPB|PHS|PPDIV	GLI family zinc finger 3	protein-coding
siCtrl_G9a_GST_peak_1887	chr12	78790015	78790204	+	104	NA	Intergenic	Intergenic	-36583	NR_135021	105369860	Hs.156898	NR_135021	ENSG00000258220	LINC02424	-	long intergenic non-protein coding RNA 2424	ncRNA
siCtrl_G9a_GST_peak_2427	chr15	23500020	23500079	+	104	NA	intron (NM_001271664, intron 9 of 11)	intron (NM_001271664, intron 9 of 11)	64979	NR_033350	390535	Hs.454647	NM_001012423		GOLGA8EP	GOLGA8E	golgin A8 family member E, pseudogene	pseudo
siCtrl_G9a_GST_peak_7044	chr9	89874593	89874714	+	104	NA	Intergenic	Intergenic	111094	NR_161226	401535	Hs.657740	NR_161226		C9orf170	-	chromosome 9 open reading frame 170	ncRNA
siCtrl_G9a_GST_peak_5892	chr6	118981427	118981637	+	104	NA	intron (NM_001178035, intron 1 of 13)	intron (NM_001178035, intron 1 of 13)	-8778	NM_001042475	387119	Hs.656959	NM_206921	ENSG00000111860	CEP85L	C6orf204|NY-BR-15|bA57K17.2	centrosomal protein 85 like	protein-coding
siCtrl_G9a_GST_peak_7009	chr9	74427483	74427681	+	104	NA	Intergenic	Intergenic	-44153	NM_001349784	23670	Hs.494146	NM_013390	ENSG00000135048	CEMIP2	TMEM2	cell migration inducing hyaluronidase 2	protein-coding
siCtrl_G9a_GST_peak_4923	chr4	37159004	37159373	+	104	NA	Intergenic	MLT2B1|LTR|ERVL	84425	NR_039965	100616435		NR_039965	ENSG00000264319	MIR4801	-	microRNA 4801	ncRNA
siCtrl_G9a_GST_peak_4664	chr3	59843660	59843774	+	104	NA	intron (NM_001354589, intron 7 of 8)	intron (NM_001354589, intron 7 of 8)	-199494	NR_149028	339902	Hs.132446	NR_149028		LOC339902	-	hCG1813818	ncRNA
siCtrl_G9a_GST_peak_1214	chr10	84741191	84741453	+	104	NA	intron (NR_163253, intron 10 of 10)	intron (NR_163253, intron 10 of 10)	695523	NR_134317	105378397	Hs.147725	NR_134317		LINC02650	-	long intergenic non-protein coding RNA 2650	ncRNA
siCtrl_G9a_GST_peak_2391	chr14	86067698	86067897	+	104	NA	intron (NM_001346143, intron 1 of 1)	intron (NM_001346143, intron 1 of 1)	68104	NM_001346143	23768	Hs.533710	NM_013231	ENSG00000185070	FLRT2	-	fibronectin leucine rich transmembrane protein 2	protein-coding
siCtrl_G9a_GST_peak_1767	chr12	63096682	63096745	+	104	NA	intron (NM_020700, intron 6 of 9)	MIRc|SINE|MIR	99247	NR_029661	406891		NR_029661	ENSG00000199179	MIRLET7I	LET7I|MIRNLET7I|hsa-let-7i|let-7i	microRNA let-7i	ncRNA
siCtrl_G9a_GST_peak_776	chr1	208520872	208521026	+	104	NA	Intergenic	Intergenic	-103220	NM_025179	5362	Hs.497626	NM_025179	ENSG00000076356	PLXNA2	OCT|PLXN2	plexin A2	protein-coding
[truncated: 4,952 more rows]

## Sheet: siMYCN_G9a_p-5
PeakID (cmd=annotatePeaks.pl p-5narrowpeak/siMYCN_G9a_GST_macspeaks.txt hg19)	Chr	Start	End	Strand	Peak Score	Focus Ratio/Region Size	Annotation	Detailed Annotation	Distance to TSS	Nearest PromoterID	Entrez ID	Nearest Unigene	Nearest Refseq	Nearest Ensembl	Gene Name	Gene Alias	Gene Description	Gene Type
[truncated: 2,428 more rows]
