# Supplementary material for: MYCN drives oncogenesis by cooperating with the histone methyltransferase G9a and the WDR5 adaptor to orchestrate global gene transcription
Source: PLoS Biol. 2024 Mar 28;22(3):e3002240. doi: 10.1371/journal.pbio.3002240 (PMC11003700; doi:10.1371/journal.pbio.3002240)
Supplement: S9 Table — (XLSX) [file pbio.3002240.s016.xlsx]

## Sheet: siCtrl_WDR5_p-7
Table S9. WDR5 ChIP-seq peaks identified in siCtrl and siWDR5 transfected NB cells.
PeakID (cmd=annotatePeaks.pl p-7narrowpeak/10_siC_WDR5_macspeaks.txt hg19)	Chr	Start	End	Strand	Peak Score	Focus Ratio/Region Size	Annotation	Detailed Annotation	Distance to TSS	Nearest PromoterID	Entrez ID	Nearest Unigene	Nearest Refseq	Nearest Ensembl	Gene Name	Gene Alias	Gene Description	Gene Type
10_siC_WDR5_peak_5678	chr16	70557114	70558685	+	5489	NA	promoter-TSS (NM_015386)	promoter-TSS (NM_015386)	180	NM_012426	23450	Hs.514435	NM_012426	ENSG00000189091	SF3B3	RSE1|SAP130|SF3b130|STAF130	splicing factor 3b subunit 3	protein-coding
10_siC_WDR5_peak_3291	chr12	56509836	56512271	+	5136	NA	promoter-TSS (NM_032786)	promoter-TSS (NM_032786)	636	NM_021104	6171	Hs.112553	NM_021104	ENSG00000229117	RPL41	L41	ribosomal protein L41	protein-coding
10_siC_WDR5_peak_8921	chr2	217363020	217364357	+	5082	NA	intron (NM_000998, intron 1 of 3)	CpG	121	NM_000998	6168	Hs.433701	NM_000998	ENSG00000197756	RPL37A	L37A	ribosomal protein L37a	protein-coding
10_siC_WDR5_peak_6909	chr18	47018017	47019064	+	5068	NA	promoter-TSS (NM_001369561)	promoter-TSS (NM_001369561)	-294	NM_001369557	6139	Hs.293653	NM_000985	ENSG00000265681	RPL17	L17|PD-1|RPL23	ribosomal protein L17	protein-coding
10_siC_WDR5_peak_15351	chrX	118924778	118926141	+	4860	NA	intron (NM_001000, intron 1 of 2)	CpG	134	NM_001000	6170	Hs.300141	NM_001000	ENSG00000198918	RPL39	L39|RPL39P42|RPL39_23_1806	ribosomal protein L39	protein-coding
10_siC_WDR5_peak_11006	chr4	83820824	83822503	+	4812	NA	promoter-TSS (NM_001318120)	promoter-TSS (NM_001318120)	61	NM_001318120	22872	Hs.370024	NM_014933	ENSG00000138674	SEC31A	ABP125|ABP130|HSPC275|HSPC334|SEC31L1	SEC31 homolog A, COPII coat complex component	protein-coding
10_siC_WDR5_peak_14203	chr8	74205131	74206645	+	4650	NA	promoter-TSS (NM_000971)	promoter-TSS (NM_000971)	-20	NM_000971	6129	Hs.421257	NM_000971	ENSG00000147604	RPL7	L7|humL7-1	ribosomal protein L7	protein-coding
10_siC_WDR5_peak_268	chr1	45096714	45098318	+	4648	NA	intron (NM_001319957, intron 4 of 13)	CpG	39212	NR_145816	109623472		NR_145816		SNORD145	-	small nucleolar RNA, C/D box 145	snoRNA
10_siC_WDR5_peak_10738	chr3	197676655	197677949	+	4643	NA	promoter-TSS (NM_001134435)	promoter-TSS (NM_001134435)	241	NM_000996	6165	Hs.529631	NM_000996	ENSG00000182899	RPL35A	DBA5|L35A|eL33	ribosomal protein L35a	protein-coding
10_siC_WDR5_peak_6088	chr17	37008958	37010845	+	4626	NA	promoter-TSS (NR_002576)	promoter-TSS (NR_002576)	73	NM_000978	9349	Hs.406300	NM_000978	ENSG00000125691	RPL23	L23|rpL17	ribosomal protein L23	protein-coding
10_siC_WDR5_peak_9786	chr22	38712356	38714303	+	4618	NA	5' UTR (NM_152221, exon 1 of 11)	5' UTR (NM_152221, exon 1 of 11)	109	NM_152221	1454	Hs.474833	NM_001894	ENSG00000213923	CSNK1E	CKIe|CKIepsilon|HCKIE	casein kinase 1 epsilon	protein-coding
10_siC_WDR5_peak_127	chr1	24017860	24019199	+	4582	NA	intron (NM_001199802, intron 1 of 5)	CpG	233	NM_000975	6135	Hs.719951	NM_000975	ENSG00000142676	RPL11	DBA7|GIG34|L11|uL5	ribosomal protein L11	protein-coding
10_siC_WDR5_peak_116	chr1	21502352	21503538	+	4579	NA	intron (NM_001198801, intron 1 of 34)	G-rich|Low_complexity|Low_complexity	445	NM_001198801	8672	Hs.467084	NM_003760	ENSG00000075151	EIF4G3	eIF-4G 3|eIF4G 3|eIF4GII	eukaryotic translation initiation factor 4 gamma 3	protein-coding
10_siC_WDR5_peak_1866	chr10	79793377	79794488	+	4534	NA	intron (NM_033022, intron 1 of 5)	CpG	311	NM_001142285	6229	Hs.280130	NM_001026	ENSG00000138326	RPS24	DBA3|S24|eS24	ribosomal protein S24	protein-coding
10_siC_WDR5_peak_7201	chr19	10828017	10829285	+	4529	NA	promoter-TSS (NM_004945)	promoter-TSS (NM_004945)	-78	NM_004945	1785	Hs.211463	NM_004945	ENSG00000079805	DNM2	CMT2M|CMTDI1|CMTDIB|DI-CMTB|DYN2|DYNII|LCCS5	dynamin 2	protein-coding
10_siC_WDR5_peak_11073	chr4	109541507	109542465	+	4524	NA	promoter-TSS (NR_026968)	promoter-TSS (NR_026968)	201	NM_001319234	6164	Hs.438227	NM_000995	ENSG00000109475	RPL34	L34	ribosomal protein L34	protein-coding
10_siC_WDR5_peak_14017	chr8	26148638	26149975	+	4468	NA	5' UTR (NM_002717, exon 1 of 10)	5' UTR (NM_002717, exon 1 of 10)	282	NM_002717	5520	Hs.146339	NM_002717	ENSG00000221914	PPP2R2A	B55A|B55ALPHA|PR52A|PR55A|PR55alpha	protein phosphatase 2 regulatory subunit Balpha	protein-coding
10_siC_WDR5_peak_12059	chr5	180669582	180671704	+	4435	NA	promoter-TSS (NR_002591)	promoter-TSS (NR_002591)	263	NM_006098	10399	Hs.5662	NM_006098	ENSG00000204628	RACK1	GNB2L1|Gnb2-rs1|H12.3|HLC-7|PIG21	receptor for activated C kinase 1	protein-coding
10_siC_WDR5_peak_11414	chr5	40834407	40836149	+	4389	NA	promoter-TSS (NM_000997)	promoter-TSS (NM_000997)	46	NM_000997	6167	Hs.80545	NM_000997	ENSG00000145592	RPL37	L37	ribosomal protein L37	protein-coding
10_siC_WDR5_peak_8469	chr2	101618290	101619991	+	4356	NA	intron (NM_001099693, intron 1 of 3)	intron (NM_001099693, intron 1 of 3)	389	NM_000993	6160	Hs.469473	NM_000993	ENSG00000071082	RPL31	L31	ribosomal protein L31	protein-coding
10_siC_WDR5_peak_10861	chr4	39459668	39461193	+	4323	NA	promoter-TSS (NM_006859)	promoter-TSS (NM_006859)	138	NM_001024921	6133	Hs.412370	NM_000661	ENSG00000163682	RPL9	L9|NPC-A-16	ribosomal protein L9	protein-coding
10_siC_WDR5_peak_5989	chr17	26368062	26369169	+	4309	NA	Intergenic	CpG	-1088	NM_016231	51701	Hs.208759	NM_016231	ENSG00000087095	NLK	-	nemo like kinase	protein-coding
10_siC_WDR5_peak_14972	chr9	127623227	127625101	+	4281	NA	promoter-TSS (NM_030978)	promoter-TSS (NM_030978)	72	NM_007209	11224	Hs.182825	NM_007209	ENSG00000136942	RPL35	DBA19|L35	ribosomal protein L35	protein-coding
10_siC_WDR5_peak_8228	chr2	62114784	62116329	+	4208	NA	promoter-TSS (NM_001321782)	promoter-TSS (NM_001321782)	235	NM_006430	10575	Hs.421509	NM_006430	ENSG00000115484	CCT4	CCT-DELTA|Cctd|SRB	chaperonin containing TCP1 subunit 4	protein-coding
10_siC_WDR5_peak_9280	chr20	37063020	37064224	+	4192	NA	promoter-TSS (NR_003018)	promoter-TSS (NR_003018)	398	NR_027241	388796	Hs.400876	NR_015366	ENSG00000196756	SNHG17	-	small nucleolar RNA host gene 17	ncRNA
10_siC_WDR5_peak_11859	chr5	149828208	149829809	+	4162	NA	intron (NM_005617, intron 1 of 4)	CpG	294	NM_001025070	6208	Hs.744846	NM_005617	ENSG00000164587	RPS14	EMTB|S14	ribosomal protein S14	protein-coding
10_siC_WDR5_peak_15085	chr9	136214091	136215971	+	4146	NA	promoter-TSS (NM_000972)	promoter-TSS (NM_000972)	-20	NM_181491	6837	Hs.78354	NM_006752	ENSG00000148297	MED22	MED24|SRB6|SURF5|surf-5	mediator complex subunit 22	protein-coding
10_siC_WDR5_peak_13955	chr8	15396880	15398418	+	4145	NA	promoter-TSS (NM_001356429)	promoter-TSS (NM_001356429)	53	NM_178234	7991	Hs.426324	NM_006765	ENSG00000104723	TUSC3	D8S1992|M33|MRT22|MRT7|MagT2|N33|OST3A|SLC58A2	tumor suppressor candidate 3	protein-coding
10_siC_WDR5_peak_7132	chr19	5689960	5691730	+	4130	NA	TTS (NM_001276480)	TTS (NM_001276480)	539	NM_033643	25873	Hs.408018	NM_015414	ENSG00000130255	RPL36	L36	ribosomal protein L36	protein-coding
10_siC_WDR5_peak_3641	chr12	112846134	112847771	+	4076	NA	5' UTR (NM_001320140, exon 1 of 7)	5' UTR (NM_001320140, exon 1 of 7)	137	NM_001320140	6128	Hs.528668	NM_000970	ENSG00000089009	RPL6	L6|SHUJUN-2|TAXREB107|TXREB1	ribosomal protein L6	protein-coding
10_siC_WDR5_peak_270	chr1	45240328	45242203	+	4052	NA	promoter-TSS (NR_000015)	promoter-TSS (NR_000015)	53	NM_001012	6202	Hs.512675	NM_001012	ENSG00000142937	RPS8	S8	ribosomal protein S8	protein-coding
10_siC_WDR5_peak_4579	chr14	102275984	102276822	+	4046	NA	intron (NM_178586, intron 1 of 12)	intron (NM_178586, intron 1 of 12)	203	NM_001352912	5527	Hs.368264	NM_002719	ENSG00000078304	PPP2R5C	B56G|B56gamma|PR61G	protein phosphatase 2 regulatory subunit B'gamma	protein-coding
10_siC_WDR5_peak_578	chr1	93297217	93298590	+	4045	NA	TTS (NM_001252273)	TTS (NM_001252273)	306	NM_000969	6125	Hs.532359	NM_000969	ENSG00000122406	RPL5	L5|MSTP030|PPP1R135|uL18	ribosomal protein L5	protein-coding
10_siC_WDR5_peak_10645	chr3	184032126	184033374	+	4030	NA	promoter-TSS (NM_182917)	promoter-TSS (NM_182917)	-202	NM_182917	1981	Hs.433750	NM_004953	ENSG00000114867	EIF4G1	EIF-4G1|EIF4F|EIF4G|EIF4GI|P220|PARK18	eukaryotic translation initiation factor 4 gamma 1	protein-coding
10_siC_WDR5_peak_10333	chr3	101404772	101406083	+	4021	NA	intron (NM_000986, intron 1 of 5)	CpG-18749	135	NM_000986	6152	Hs.477028	NM_000986	ENSG00000114391	RPL24	HEL-S-310|L24	ribosomal protein L24	protein-coding
10_siC_WDR5_peak_15324	chrX	100645526	100646697	+	3972	NA	promoter-TSS (NM_001287344)	promoter-TSS (NM_001287344)	112	NM_001199974	100529097	Hs.432485	NM_001199973		RPL36A-HNRNPH2	-	RPL36A-HNRNPH2 readthrough	protein-coding
10_siC_WDR5_peak_10179	chr3	52028968	52030255	+	3939	NA	intron (NM_000992, intron 1 of 3)	intron (NM_000992, intron 1 of 3)	300	NM_000992	6159	Hs.425125	NM_000992	ENSG00000162244	RPL29	HIP|HUMRPL29|L29|RPL29P10|RPL29_3_370	ribosomal protein L29	protein-coding
10_siC_WDR5_peak_12320	chr6	31587831	31589775	+	3911	NA	intron (NM_080686, intron 1 of 30).7	CpG	311	NM_004638	7916	Hs.436093	NM_004638	ENSG00000204469	PRRC2A	BAT2|D6S51|D6S51E|G2	proline rich coiled-coil 2A	protein-coding
10_siC_WDR5_peak_5786	chr17	1302252	1304146	+	3909	NA	intron (NR_024058, intron 1 of 6)	CpG	317	NM_006761	7531	Hs.513851	NM_006761	ENSG00000108953	YWHAE	14-3-3E|HEL2|KCIP-1|MDCR|MDS	tyrosine 3-monooxygenase/tryptophan 5-monooxygenase activation protein epsilon	protein-coding
10_siC_WDR5_peak_7049	chr19	1438098	1439547	+	3907	NA	exon (NM_001018, exon 2 of 4)	exon (NM_001018, exon 2 of 4)	398	NM_001308226	6209	Hs.406683	NM_001018	ENSG00000115268	RPS15	RIG|S15	ribosomal protein S15	protein-coding
10_siC_WDR5_peak_2650	chr11	73498329	73499653	+	3899	NA	promoter-TSS (NM_016055)	promoter-TSS (NM_016055)	72	NM_001318499	51642	Hs.503239	NM_016055	ENSG00000175581	MRPL48	CGI-118|HSPC290|L48MT|MRP-L48	mitochondrial ribosomal protein L48	protein-coding
10_siC_WDR5_peak_15064	chr9	134268613	134270513	+	3898	NA	Intergenic	Intergenic	-35914	NM_013318	84726	Hs.743955	NM_013318	ENSG00000130723	PRRC2B	BAT2L|BAT2L1|KIAA0515|LQFBS-1	proline rich coiled-coil 2B	protein-coding
10_siC_WDR5_peak_14583	chr9	19379241	19380862	+	3894	NA	intron (NM_001010, intron 1 of 5)	CpG	183	NM_001010	6194	Hs.408073	NM_001010	ENSG00000137154	RPS6	S6	ribosomal protein S6	protein-coding
10_siC_WDR5_peak_15297	chrX	71496417	71497581	+	3884	NA	promoter-TSS (NM_001007)	promoter-TSS (NM_001007)	99	NM_001007	6191	Hs.118076	NM_001007	ENSG00000198034	RPS4X	CCG2|DXS306|RPS4|S4|SCAR|SCR10	ribosomal protein S4 X-linked	protein-coding
10_siC_WDR5_peak_14899	chr9	113017801	113019351	+	3882	NA	intron (NM_001244938, intron 1 of 3)	CpG	211	NM_001244938	7295	Hs.435136	NM_003329	ENSG00000136810	TXN	TRDX|TRX|TRX1	thioredoxin	protein-coding
10_siC_WDR5_peak_8322	chr2	73460142	73462416	+	3871	NA	promoter-TSS (NM_001166284)	promoter-TSS (NM_001166284)	-85	NM_001166285	10574	Hs.368149	NM_006429	ENSG00000135624	CCT7	CCTETA|CCTH|NIP7-1|TCP1ETA	chaperonin containing TCP1 subunit 7	protein-coding
10_siC_WDR5_peak_15296	chrX	71458486	71459799	+	3861	NA	promoter-TSS (NM_017669)	promoter-TSS (NM_017669)	-265	NM_001009954	54821	Hs.47558	NM_017669	ENSG00000186871	ERCC6L	PICH|RAD26L	ERCC excision repair 6 like, spindle assembly checkpoint helicase	protein-coding
10_siC_WDR5_peak_5387	chr16	18800818	18802176	+	3852	NA	intron (NM_001030009, intron 1 of 4)	CpG	159	NM_001019	6210	Hs.370504	NM_001019	ENSG00000134419	RPS15A	DBA20|S15a	ribosomal protein S15a	protein-coding
10_siC_WDR5_peak_14992	chr9	130212635	130214158	+	3837	NA	promoter-TSS (NM_138361)	promoter-TSS (NM_138361)	289	NM_000976	6136	Hs.408054	NM_000976	ENSG00000197958	RPL12	L12	ribosomal protein L12	protein-coding
10_siC_WDR5_peak_9770	chr22	36924099	36926263	+	3837	NA	promoter-TSS (NM_003753)	promoter-TSS (NM_003753)	32	NM_003753	8664	Hs.55682	NM_003753	ENSG00000100353	EIF3D	EIF3S7|eIF3-p66|eIF3-zeta	eukaryotic translation initiation factor 3 subunit D	protein-coding
10_siC_WDR5_peak_9964	chr3	12882137	12883450	+	3833	NA	promoter-TSS (NR_002582)	promoter-TSS (NR_002582)	271	NM_000994	6161	Hs.265174	NM_000994	ENSG00000144713	RPL32	L32|PP9932	ribosomal protein L32	protein-coding
10_siC_WDR5_peak_178	chr1	31537642	31538729	+	3820	NA	intron (NM_014676, intron 1 of 21)	intron (NM_014676, intron 1 of 21)	379	NM_014676	9698	Hs.281707	NM_014676	ENSG00000134644	PUM1	HSPUM|PUMH|PUMH1|PUML1|SCA47	pumilio RNA binding family member 1	protein-coding
10_siC_WDR5_peak_2488	chr11	62340407	62342002	+	3818	NA	intron (NM_001404, intron 1 of 9)	intron (NM_001404, intron 1 of 9)	159	NM_001404	1937	Hs.144835	NM_001404	ENSG00000254772	EEF1G	EF1G|GIG35	eukaryotic translation elongation factor 1 gamma	protein-coding
10_siC_WDR5_peak_13301	chr7	45025409	45026722	+	3817	NA	promoter-TSS (NR_002952)	promoter-TSS (NR_002952)	230	NR_152596	285958	Hs.25892	NR_003697	ENSG00000232956	SNHG15	C7orf40|Linc-Myo1g|MYO1GUT	small nucleolar RNA host gene 15	ncRNA
10_siC_WDR5_peak_12188	chr6	20401057	20404566	+	3782	NA	exon (NM_001949, exon 1 of 7)	exon (NM_001949, exon 1 of 7)	701	NM_001949	1871	Hs.269408	NM_001949	ENSG00000112242	E2F3	E2F-3	E2F transcription factor 3	protein-coding
10_siC_WDR5_peak_8049	chr2	32264417	32265511	+	3778	NA	promoter-TSS (NR_135587)	promoter-TSS (NR_135587)	-60	NR_135587	84661	Hs.531788	NM_032574	ENSG00000162961	DPY30	Cps25|HDPY-30|Saf19	dpy-30 histone methyltransferase complex regulatory subunit	protein-coding
10_siC_WDR5_peak_5447	chr16	28302220	28303729	+	3775	NA	promoter-TSS (NM_001024401)	promoter-TSS (NM_001024401)	-872	NM_001024401	388228	Hs.97837	NM_001024401	ENSG00000188322	SBK1	SBK	SH3 domain binding kinase 1	protein-coding
10_siC_WDR5_peak_15442	chrY	2709357	2710364	+	3763	NA	intron (NM_001008, intron 1 of 6)	intron (NM_001008, intron 1 of 6)	217	NM_001008	6192	Hs.282376	NM_001008	ENSG00000129824	RPS4Y1	RPS4Y|S4	ribosomal protein S4 Y-linked 1	protein-coding
10_siC_WDR5_peak_5081	chr15	82823557	82825412	+	3763	NA	non-coding (NR_111943, exon 1 of 4)	non-coding (NR_111943, exon 1 of 4)	381	NR_111944	6218	Hs.433427	NM_001021	ENSG00000182774	RPS17	DBA4|RPS17L|RPS17L1|RPS17L2|S17	ribosomal protein S17	protein-coding
10_siC_WDR5_peak_5761	chr16	89626473	89628061	+	3758	NA	promoter-TSS (NR_002450)	promoter-TSS (NR_002450)	148	NM_033251	6137	Hs.410817	NM_000977	ENSG00000167526	RPL13	BBC1|D16S444E|D16S44E|L13	ribosomal protein L13	protein-coding
10_siC_WDR5_peak_4100	chr13	99852237	99853657	+	3734	NA	promoter-TSS (NR_036532)	promoter-TSS (NR_036532)	62	NR_036532	100289373	Hs.225914	NR_036531	ENSG00000228889	UBAC2-AS1	-	UBAC2 antisense RNA 1	ncRNA
10_siC_WDR5_peak_12414	chr6	38669956	38671173	+	3734	NA	intron (NM_006708, intron 1 of 5)	intron (NM_006708, intron 1 of 5)	357	NM_006708	2739	Hs.268849	NM_006708	ENSG00000124767	GLO1	GLOD1|GLYI|HEL-S-74	glyoxalase I	protein-coding
10_siC_WDR5_peak_7646	chr19	49121553	49123274	+	3716	NA	promoter-TSS (NM_020126)	promoter-TSS (NM_020126)	22	NR_073022	6141	Hs.515517	NM_000979	ENSG00000063177	RPL18	DBA18|L18	ribosomal protein L18	protein-coding
10_siC_WDR5_peak_9797	chr22	39714704	39716982	+	3702	NA	promoter-TSS (NM_000967)	promoter-TSS (NM_000967)	-215	NM_000967	6122	Hs.119598	NM_000967	ENSG00000100316	RPL3	ASC-1|L3|TARBP-B	ribosomal protein L3	protein-coding
10_siC_WDR5_peak_15078	chr9	135544903	135546706	+	3687	NA	promoter-TSS (NM_012204)	promoter-TSS (NM_012204)	-16	NM_138620	64794	Hs.660767	NM_022779	ENSG00000125485	DDX31	PPP1R25	DEAD-box helicase 31	protein-coding
10_siC_WDR5_peak_9088	chr20	2450546	2451864	+	3687	NA	intron (NM_198216, intron 1 of 6)	CpG	230	NM_198216	6628	Hs.83753	NM_003091	ENSG00000125835	SNRPB	CCMS|COD|SNRPB1|Sm-B/B'|SmB/B'|SmB/SmB'|snRNP-B	small nuclear ribonucleoprotein polypeptides B and B1	protein-coding
10_siC_WDR5_peak_12374	chr6	34392621	34394541	+	3675	NA	5' UTR (NM_001203245, exon 1 of 6)	5' UTR (NM_001203245, exon 1 of 6)	265	NM_001014	6204	Hs.406620	NM_001014	ENSG00000124614	RPS10	DBA9|S10	ribosomal protein S10	protein-coding
10_siC_WDR5_peak_13748	chr7	135346248	135347790	+	3671	NA	promoter-TSS (NM_001130929)	promoter-TSS (NM_001130929)	-243	NM_001130929	647087	Hs.200022	NM_001130929	ENSG00000243317	STMP1	C7orf73|PL-5283	short transmembrane mitochondrial protein 1	protein-coding
10_siC_WDR5_peak_870	chr1	154955404	154956096	+	3656	NA	promoter-TSS (NM_201398)	promoter-TSS (NM_201398)	-70	NM_025207	80308	Hs.118666	NM_025207	ENSG00000160688	FLAD1	FAD1|FADS|LSMFLAD|PP591	flavin adenine dinucleotide synthetase 1	protein-coding
10_siC_WDR5_peak_7099	chr19	3984633	3985725	+	3647	NA	intron (NM_001961, intron 1 of 14)	CpG	282	NM_001961	1938	Hs.515070	NM_001961	ENSG00000167658	EEF2	EEF-2|EF-2|EF2|SCA26	eukaryotic translation elongation factor 2	protein-coding
10_siC_WDR5_peak_9517	chr21	32930946	32932844	+	3641	NA	promoter-TSS (NM_003253)	promoter-TSS (NM_003253)	349	NM_001321023	150051	Hs.708976	NM_001321023		LOC150051	-	uncharacterized LOC150051	protein-coding
10_siC_WDR5_peak_12601	chr6	88410672	88412308	+	3632	NA	5' UTR (NM_018064, exon 1 of 5)	5' UTR (NM_018064, exon 1 of 5)	461	NM_018064	55122	Hs.485915	NM_018064	ENSG00000135334	AKIRIN2	C6orf166|FBI1|dJ486L4.2	akirin 2	protein-coding
10_siC_WDR5_peak_5945	chr17	17875461	17876311	+	3629	NA	promoter-TSS (NM_001350332)	promoter-TSS (NM_001350332)	-172	NM_001350333	146691	Hs.462379	NM_144678	ENSG00000175662	TOM1L2	-	target of myb1 like 2 membrane trafficking protein	protein-coding
10_siC_WDR5_peak_8400	chr2	85838755	85840221	+	3621	NA	promoter-TSS (NM_001013649)	promoter-TSS (NM_001013649)	262	NM_001256728	10713	Hs.654745	NM_006590	ENSG00000168883	USP39	65K|CGI-21|HSPC332|SAD1|SNRNP65	ubiquitin specific peptidase 39	protein-coding
10_siC_WDR5_peak_6032	chr17	29421081	29422487	+	3617	NA	promoter-TSS (NR_039886)	promoter-TSS (NR_039886)	-161	NM_000267	4763	Hs.113577	NM_000267	ENSG00000196712	NF1	NFNS|VRNF|WSS	neurofibromin 1	protein-coding
10_siC_WDR5_peak_7494	chr19	39339763	39341384	+	3607	NA	promoter-TSS (NM_001533)	promoter-TSS (NM_001533)	44	NM_001533	3191	Hs.644906	NM_001533	ENSG00000104824	HNRNPL	HNRPL|P/OKcl.14|hnRNP-L	heterogeneous nuclear ribonucleoprotein L	protein-coding
10_siC_WDR5_peak_10013	chr3	23957998	23959659	+	3605	NA	promoter-TSS (NM_020345)	promoter-TSS (NM_020345)	205	NM_001253383	6138	Hs.381219	NM_002948	ENSG00000174748	RPL15	DBA12|EC45|L15|RPL10|RPLY10|RPYL10	ribosomal protein L15	protein-coding
10_siC_WDR5_peak_14500	chr8	146016732	146018301	+	3604	NA	promoter-TSS (NR_106909)	promoter-TSS (NR_106909)	-140	NR_106909	102465978		NR_106909	ENSG00000283764	MIR6850	hsa-mir-6850	microRNA 6850	ncRNA
10_siC_WDR5_peak_8945	chr2	220082977	220084806	+	3598	NA	promoter-TSS (NM_005689)	promoter-TSS (NM_005689)	-211	NM_001349828	10058	Hs.107911	NM_005689	ENSG00000115657	ABCB6	ABC|LAN|MTABC3|PRP|umat	ATP binding cassette subfamily B member 6 (Langereis blood group)	protein-coding
10_siC_WDR5_peak_12344	chr6	32937490	32941277	+	3597	NA	promoter-TSS (NM_001199455)	promoter-TSS (NM_001199455)	11	NM_001199455	6046	Hs.75243	NM_005104	ENSG00000204256	BRD2	BRD2-IT1|D6S113E|FSH|FSRG1|NAT|O27.1.1|RING3|RNF3	bromodomain containing 2	protein-coding
10_siC_WDR5_peak_7270	chr19	14116327	14117854	+	3595	NA	promoter-TSS (NM_002918)	promoter-TSS (NM_002918)	42	NM_002918	5989	Hs.655215	NM_002918	ENSG00000132005	RFX1	EFC|RFX	regulatory factor X1	protein-coding
10_siC_WDR5_peak_10083	chr3	40565804	40566982	+	3590	NA	promoter-TSS (NM_198484)	promoter-TSS (NM_198484)	24	NM_001287245	285268	Hs.19977	NM_198484	ENSG00000172888	ZNF621	-	zinc finger protein 621	protein-coding
10_siC_WDR5_peak_5891	chr17	8285694	8287221	+	3587	NA	promoter-TSS (NM_001315531)	promoter-TSS (NM_001315531)	54	NM_000987	6154	Hs.482144	NM_000987	ENSG00000161970	RPL26	DBA11|L26	ribosomal protein L26	protein-coding
10_siC_WDR5_peak_11194	chr4	152020270	152021622	+	3572	NA	intron (NM_001267699, intron 1 of 2)	CpG	166	NM_001006	6189	Hs.356572	NM_001006	ENSG00000145425	RPS3A	FTE1|MFTL|S3A	ribosomal protein S3A	protein-coding
10_siC_WDR5_peak_3314	chr12	57118091	57119518	+	3570	NA	5' UTR (NM_001113201, exon 1 of 8)	5' UTR (NM_001113201, exon 1 of 8)	279	NM_001113202	4666	Hs.505735	NM_005594	ENSG00000196531	NACA	HSD48|NAC-alpha|NACA1|skNAC	nascent polypeptide associated complex subunit alpha	protein-coding
10_siC_WDR5_peak_7157	chr19	7894461	7895333	+	3544	NA	promoter-TSS (NM_145245)	promoter-TSS (NM_145245)	-207	NM_001159944	115704	Hs.26870	NM_145245	ENSG00000142459	EVI5L	-	ecotropic viral integration site 5 like	protein-coding
10_siC_WDR5_peak_15217	chrX	46988093	46989841	+	3527	NA	Intergenic	Intergenic	15642	NM_019056	54539	Hs.521969	NM_019056	ENSG00000147123	NDUFB11	CI-ESSS|ESSS|MC1DN30|NP17.3|Np15|P17.3	NADH:ubiquinone oxidoreductase subunit B11	protein-coding
10_siC_WDR5_peak_477	chr1	67894693	67896985	+	3514	NA	exon (NM_015640, exon 1 of 8)	exon (NM_015640, exon 1 of 8)	246	NM_001018068	26135	Hs.530412	NM_015640	ENSG00000142864	SERBP1	CGI-55|CHD3IP|HABP4L|PAI-RBP1|PAIRBP1	SERPINE1 mRNA binding protein 1	protein-coding
10_siC_WDR5_peak_1050	chr1	173836177	173837999	+	3514	NA	promoter-TSS (NR_152530)	promoter-TSS (NR_152530)	41	NR_152530	60674	Hs.531856	NR_002578	ENSG00000234741	GAS5	NCRNA00030|SNHG2	growth arrest specific 5	ncRNA
10_siC_WDR5_peak_3286	chr12	56367234	56368245	+	3487	NA	promoter-TSS (NM_001252036)	promoter-TSS (NM_001252036)	42	NM_001252036	5869	Hs.157659	NM_002868	ENSG00000111540	RAB5B	-	RAB5B, member RAS oncogene family	protein-coding
10_siC_WDR5_peak_10906	chr4	48781850	48782846	+	3481	NA	promoter-TSS (NM_015030)	promoter-TSS (NM_015030)	-32	NM_015030	285527	Hs.595553	NM_015030	ENSG00000075539	FRYL	AF4p12|KIAA0826|MOR2	FRY like transcription coactivator	protein-coding
10_siC_WDR5_peak_15004	chr9	130829457	130830691	+	3471	NA	promoter-TSS (NM_197956)	promoter-TSS (NM_197956)	-405	NM_001006641	114789	Hs.5476	NM_052901	ENSG00000148339	SLC25A25	MCSC|PCSCL|SCAMC-2	solute carrier family 25 member 25	protein-coding
10_siC_WDR5_peak_3250	chr12	53773002	53774549	+	3417	NA	promoter-TSS (NM_003109)	promoter-TSS (NM_003109)	-185	NM_138473	6667	Hs.620754	NM_003109	ENSG00000185591	SP1	-	Sp1 transcription factor	protein-coding
10_siC_WDR5_peak_2463	chr11	59382948	59384208	+	3411	NA	promoter-TSS (NM_002556)	promoter-TSS (NM_002556)	-331	NM_002556	5007	Hs.597091	NM_002556	ENSG00000110048	OSBP	OSBP1	oxysterol binding protein	protein-coding
10_siC_WDR5_peak_5263	chr16	2013535	2015469	+	3408	NA	promoter-TSS (NR_003142)	promoter-TSS (NR_003142)	325	NM_002952	6187	Hs.356366	NM_002952	ENSG00000140988	RPS2	LLREP3|S2	ribosomal protein S2	protein-coding
10_siC_WDR5_peak_12453	chr6	42847040	42848573	+	3379	NA	intron (NR_134563, intron 1 of 5)	intron (NR_134563, intron 1 of 5)	452	NM_001366481	285855	Hs.520133	NM_198486	ENSG00000146223	RPL7L1	dJ475N16.4	ribosomal protein L7 like 1	protein-coding
10_siC_WDR5_peak_5274	chr16	2317085	2318802	+	3376	NA	promoter-TSS (NM_001286625)	promoter-TSS (NM_001286625)	-56	NM_006711	10921	Hs.355643	NM_006711	ENSG00000205937	RNPS1	E5.1	RNA binding protein with serine rich domain 1	protein-coding
10_siC_WDR5_peak_7146	chr19	6424666	6425872	+	3364	NA	promoter-TSS (NM_001366300)	promoter-TSS (NM_001366300)	-447	NM_001366299	8570	Hs.727344	NM_003685	ENSG00000088247	KHSRP	FBP2|FUBP2|KSRP|p75	KH-type splicing regulatory protein	protein-coding
10_siC_WDR5_peak_7866	chr2	3622366	3623927	+	3347	NA	intron (NM_001011, intron 1 of 6)	CpG	296	NM_001011	6201	Hs.534346	NM_001011	ENSG00000171863	RPS7	DBA8|S7|eS7	ribosomal protein S7	protein-coding
10_siC_WDR5_peak_2219	chr11	1403464	1405196	+	3347	NA	Intergenic	CpG	-6834	NM_001256629	9024	Hs.170819	NM_003957	ENSG00000174672	BRSK2	C11orf7|PEN11B|SAD1|SADA|STK29	BR serine/threonine kinase 2	protein-coding
10_siC_WDR5_peak_64	chr1	10531771	10532812	+	3321	NA	intron (NM_213566, intron 1 of 4)	CpG	295	NM_004401	1676	Hs.484782	NM_004401	ENSG00000160049	DFFA	DFF-45|DFF1|ICAD	DNA fragmentation factor subunit alpha	protein-coding
10_siC_WDR5_peak_2662	chr11	75110142	75111712	+	3313	NA	promoter-TSS (NR_000005)	promoter-TSS (NR_000005)	365	NM_001260506	6188	Hs.546286	NM_001005	ENSG00000149273	RPS3	S3	ribosomal protein S3	protein-coding
10_siC_WDR5_peak_6159	chr17	41150025	41151637	+	3306	NA	non-coding (NR_146327, exon 2 of 4)	non-coding (NR_146327, exon 2 of 4)	395	NR_146327	6155	Hs.514196	NM_000988	ENSG00000131469	RPL27	DBA16|L27	ribosomal protein L27	protein-coding
10_siC_WDR5_peak_9282	chr20	37100598	37101926	+	3290	NA	promoter-TSS (NM_001282918)	promoter-TSS (NM_001282918)	-224	NM_001282918	57148	Hs.598850	NM_020336	ENSG00000170471	RALGAPB	KIAA1219|RalGAPbeta	Ral GTPase activating protein non-catalytic beta subunit	protein-coding
10_siC_WDR5_peak_14998	chr9	130660959	130662241	+	3288	NA	intron (NM_001286999, intron 1 of 6)	CpG	327	NM_013443	30815	Hs.109672	NM_013443	ENSG00000160408	ST6GALNAC6	SIAT7-F|SIAT7F|ST6GALNACVI	ST6 N-acetylgalactosaminide alpha-2,6-sialyltransferase 6	protein-coding
10_siC_WDR5_peak_4727	chr15	43885677	43887187	+	3285	NA	non-coding (NR_135750, exon 2 of 10)	non-coding (NR_135750, exon 2 of 10)	400	NR_135751	1159	Hs.741420	NM_020990	ENSG00000237289	CKMT1B	CKMT|CKMT1|UMTCK	creatine kinase, mitochondrial 1B	protein-coding
10_siC_WDR5_peak_3960	chr13	44765599	44766339	+	3283	NA	Intergenic	Intergenic	4367	NR_107046	102465876		NR_107046	ENSG00000276319	MIR8079	hsa-mir-8079	microRNA 8079	ncRNA
10_siC_WDR5_peak_4729	chr15	43985568	43987045	+	3254	NA	non-coding (NR_135856, exon 1 of 9)	non-coding (NR_135856, exon 1 of 9)	168	NM_001321929	548596	Hs.654988	NM_001015001	ENSG00000223572	CKMT1A	CKMT1|U-MtCK|mia-CK	creatine kinase, mitochondrial 1A	protein-coding
10_siC_WDR5_peak_4903	chr15	67546557	67547710	+	3218	NA	promoter-TSS (NM_024666)	promoter-TSS (NM_024666)	-5	NM_001284349	64799	Hs.657894	NM_022784	ENSG00000103599	IQCH	NYDSP5	IQ motif containing H	protein-coding
10_siC_WDR5_peak_9615	chr21	48081218	48082319	+	3198	NA	TTS (NM_001242866)	TTS (NM_001242866)	26182	NM_001242866	3275	Hs.154163	NM_001535	ENSG00000160310	PRMT2	HRMT1L1	protein arginine methyltransferase 2	protein-coding
10_siC_WDR5_peak_12316	chr6	31508807	31510480	+	3185	NA	promoter-TSS (NR_003065)	promoter-TSS (NR_003065)	137	NR_037852	7919	Hs.254042	NM_004640	ENSG00000198563	DDX39B	BAT1|D6S81E|UAP56	DExD-box helicase 39B	protein-coding
10_siC_WDR5_peak_11405	chr5	37370798	37372153	+	3172	NA	promoter-TSS (NM_004298)	promoter-TSS (NM_004298)	-267	NM_001278312	9631	Hs.547696	NM_004298	ENSG00000113569	NUP155	ATFB15|N155	nucleoporin 155	protein-coding
10_siC_WDR5_peak_5086	chr15	83208061	83209780	+	3150	NA	non-coding (NR_111943, exon 1 of 4).2	non-coding (NR_111943, exon 1 of 4).2	288	NM_001021	6218	Hs.433427	NM_001021	ENSG00000182774	RPS17	DBA4|RPS17L|RPS17L1|RPS17L2|S17	ribosomal protein S17	protein-coding
10_siC_WDR5_peak_13475	chr7	77427281	77428319	+	3142	NA	promoter-TSS (NM_001366087)	promoter-TSS (NM_001366087)	-49	NM_032936	85025	Hs.19025	NM_032936	ENSG00000135211	TMEM60	C7orf35|DC32	transmembrane protein 60	protein-coding
10_siC_WDR5_peak_13635	chr7	106808549	106810485	+	3130	NA	promoter-TSS (NM_012257)	promoter-TSS (NM_012257)	69	NM_012257	26959	Hs.162032	NM_012257	ENSG00000105856	HBP1	-	HMG-box transcription factor 1	protein-coding
10_siC_WDR5_peak_12448	chr6	42515271	42516180	+	3105	NA	Intergenic	Intergenic	-16035	NM_015255	23304	Hs.529925	NM_015255	ENSG00000024048	UBR2	C6orf133|bA49A4.1|dJ242G1.1|dJ392M17.3	ubiquitin protein ligase E3 component n-recognin 2	protein-coding
10_siC_WDR5_peak_6887	chr18	43753021	43754377	+	3099	NA	promoter-TSS (NM_145055)	promoter-TSS (NM_145055)	-289	NM_001008239	147339	Hs.116486	NM_145055	ENSG00000152242	C18orf25	ARKL1|Ark2N|RNF111L1	chromosome 18 open reading frame 25	protein-coding
10_siC_WDR5_peak_12380	chr6	35435414	35437735	+	3061	NA	intron (NM_007104, intron 1 of 5)	CpG	396	NM_007104	4736	Hs.148340	NM_007104	ENSG00000198755	RPL10A	CSA19|Csa-19|L10A|NEDD6	ribosomal protein L10a	protein-coding
10_siC_WDR5_peak_9325	chr20	44485632	44486573	+	3056	NA	promoter-TSS (NR_037628)	promoter-TSS (NR_037628)	-71	NM_005469	10005	Hs.444776	NM_005469	ENSG00000101473	ACOT8	HNAACTE|NAP1|PTE-1|PTE-2|PTE1|PTE2|hACTE-III|hTE	acyl-CoA thioesterase 8	protein-coding
10_siC_WDR5_peak_2254	chr11	9481946	9483026	+	3030	NA	promoter-TSS (NR_036539)	promoter-TSS (NR_036539)	-26	NM_001282656	7702	Hs.523471	NM_003442	ENSG00000166478	ZNF143	SBF|STAF|pHZ-1	zinc finger protein 143	protein-coding
10_siC_WDR5_peak_7552	chr19	42772469	42773672	+	3022	NA	intron (NM_001304815, intron 1 of 20)	CpG	381	NM_001304815	23152	Hs.388236	NM_015125	ENSG00000079432	CIC	MRD45	capicua transcriptional repressor	protein-coding
10_siC_WDR5_peak_11801	chr5	139780299	139781824	+	2982	NA	promoter-TSS (NM_017978)	promoter-TSS (NM_017978)	-338	NM_020690	404734	Hs.594084	NM_020690	ENSG00000254996	ANKHD1-EIF4EBP3	MASK-BP3|MASK-BP3ARF	ANKHD1-EIF4EBP3 readthrough	protein-coding
10_siC_WDR5_peak_15211	chrX	41191939	41193709	+	2966	NA	promoter-TSS (NM_001193417)	promoter-TSS (NM_001193417)	263	NM_001356	1654	Hs.728563	NM_001356	ENSG00000215301	DDX3X	CAP-Rf|DBX|DDX14|DDX3|HLP2|MRX102	DEAD-box helicase 3 X-linked	protein-coding
10_siC_WDR5_peak_7983	chr2	25895863	25897181	+	2954	NA	promoter-TSS (NM_001351392)	promoter-TSS (NM_001351392)	-6	NM_001351381	1838	Hs.307720	NM_021907	ENSG00000138101	DTNB	-	dystrobrevin beta	protein-coding
10_siC_WDR5_peak_12350	chr6	33239048	33240597	+	2918	NA	promoter-TSS (NM_022551)	promoter-TSS (NM_022551)	-30	NM_022551	6222	Hs.448854	NM_022551	ENSG00000231500	RPS18	D6S218E|HKE3|KE-3|KE3|S18	ribosomal protein S18	protein-coding
10_siC_WDR5_peak_5503	chr16	30537149	30538465	+	2914	NA	promoter-TSS (NM_024671)	promoter-TSS (NM_024671)	80	NM_024671	79724	Hs.85658	NM_024671	ENSG00000169957	ZNF768	-	zinc finger protein 768	protein-coding
10_siC_WDR5_peak_4420	chr14	74607082	74607644	+	2912	NA	intron (NM_001024674, intron 5 of 5)	intron (NM_001024674, intron 5 of 5)	55707	NM_001024674	91750	Hs.612866	NM_001024674	ENSG00000205659	LIN52	C14orf46|c14_5549	lin-52 DREAM MuvB core complex component	protein-coding
10_siC_WDR5_peak_5247	chr16	1358727	1359907	+	2910	NA	promoter-TSS (NM_194259)	promoter-TSS (NM_194259)	164	NM_194261	7329	Hs.302903	NM_003345	ENSG00000103275	UBE2I	C358B7.1|P18|UBC9	ubiquitin conjugating enzyme E2 I	protein-coding
10_siC_WDR5_peak_6259	chr17	45972593	45974281	+	2908	NA	promoter-TSS (NR_135480)	promoter-TSS (NR_135480)	-165	NM_003110	6668	Hs.514276	NM_003110	ENSG00000167182	SP2	-	Sp2 transcription factor	protein-coding
10_siC_WDR5_peak_9562	chr21	40720061	40721863	+	2875	NA	promoter-TSS (NM_004965)	promoter-TSS (NM_004965)	52	NM_004965	3150	Hs.356285	NM_004965	ENSG00000205581	HMGN1	HMG14	high mobility group nucleosome binding domain 1	protein-coding
10_siC_WDR5_peak_1567	chr10	5931720	5932562	+	2868	NA	promoter-TSS (NM_001009941)	promoter-TSS (NM_001009941)	-25	NM_178150	84893	Hs.498543	NM_032807	ENSG00000134452	FBH1	FBXO18|Fbx18|hFBH1	F-box DNA helicase 1	protein-coding
10_siC_WDR5_peak_7105	chr19	4246683	4247357	+	2833	NA	promoter-TSS (NM_018074)	promoter-TSS (NM_018074)	-57	NM_018074	55702	Hs.21811	NM_018074	ENSG00000105248	YJU2	CCDC94	YJU2 splicing factor homolog	protein-coding
10_siC_WDR5_peak_7583	chr19	45393563	45394982	+	2821	NA	promoter-TSS (NM_001128917)	promoter-TSS (NM_001128917)	-205	NM_001128916	10452	Hs.655909	NM_006114	ENSG00000130204	TOMM40	C19orf1|D19S1177E|PER-EC1|PEREC1|TOM40	translocase of outer mitochondrial membrane 40	protein-coding
10_siC_WDR5_peak_6633	chr17	74667399	74668413	+	2815	NA	promoter-TSS (NR_130916)	promoter-TSS (NR_130916)	-104	NR_130916	105274304	Hs.572495	NR_130916	ENSG00000261335	LOC105274304	-	uncharacterized LOC105274304	ncRNA
10_siC_WDR5_peak_6736	chr17	80230558	80231997	+	2813	NA	non-coding (NR_110578, exon 1 of 9)	non-coding (NR_110578, exon 1 of 9)	299	NM_001893	1453	Hs.631725	NM_001893	ENSG00000141551	CSNK1D	ASPS|CKI-delta|CKId|CKIdelta|FASPS2|HCKID	casein kinase 1 delta	protein-coding
10_siC_WDR5_peak_2886	chr11	125461954	125463318	+	2794	NA	promoter-TSS (NR_132372)	promoter-TSS (NR_132372)	-111	NM_152713	3703	Hs.504237	NM_152713	ENSG00000134910	STT3A	ITM1|STT3-A|TMC	STT3 oligosaccharyltransferase complex catalytic subunit A	protein-coding
10_siC_WDR5_peak_11872	chr5	151150428	151151925	+	2786	NA	promoter-TSS (NM_005754)	promoter-TSS (NM_005754)	-107	NR_132346	100652758	Hs.587054	NM_001278082		LOC100652758	-	uncharacterized LOC100652758	ncRNA
10_siC_WDR5_peak_6581	chr17	72199368	72201110	+	2766	NA	intron (NM_000999, intron 2 of 4)	CpG-11066	422	NM_000999	6169	Hs.380953	NM_000999	ENSG00000172809	RPL38	L38	ribosomal protein L38	protein-coding
10_siC_WDR5_peak_13736	chr7	134330979	134331832	+	2765	NA	promoter-TSS (NM_199186)	promoter-TSS (NM_199186)	-126	NM_199186	669	Hs.198365	NM_001724	ENSG00000172331	BPGM	DPGM|ECYT8	bisphosphoglycerate mutase	protein-coding
10_siC_WDR5_peak_4689	chr15	40615428	40615970	+	2741	NA	promoter-TSS (NM_001301268)	promoter-TSS (NM_001301268)	-194	NM_001301268	100505573	Hs.530791	NM_001301268	ENSG00000259330	INAFM2	LINC00984|OGU1	InaF motif containing 2	protein-coding
10_siC_WDR5_peak_7623	chr19	47551325	47552239	+	2727	NA	promoter-TSS (NM_017854)	promoter-TSS (NM_017854)	100	NM_017854	54958	Hs.105606	NM_017854	ENSG00000130748	TMEM160	-	transmembrane protein 160	protein-coding
10_siC_WDR5_peak_6699	chr17	79212490	79213628	+	2722	NA	promoter-TSS (NM_001353403)	promoter-TSS (NM_001353403)	-52	NM_001353402	284184	Hs.356545	NM_001086521	ENSG00000224877	NDUFAF8	C17orf89	NADH:ubiquinone oxidoreductase complex assembly factor 8	protein-coding
10_siC_WDR5_peak_568	chr1	91966034	91967380	+	2709	NA	promoter-TSS (NM_001134420)	promoter-TSS (NM_001134420)	42	NM_001134420	8317	Hs.533573	NM_003503	ENSG00000097046	CDC7	CDC7L1|HsCDC7|Hsk1|huCDC7	cell division cycle 7	protein-coding
10_siC_WDR5_peak_9747	chr22	32148976	32150280	+	2698	NA	promoter-TSS (NM_014662)	promoter-TSS (NM_014662)	-326	NM_001136029	9681	Hs.435022	NM_014662	ENSG00000100150	DEPDC5	DEP.5|FFEVF|FFEVF1	DEP domain containing 5	protein-coding
10_siC_WDR5_peak_8424	chr2	88926506	88927653	+	2694	NA	promoter-TSS (NR_135540)	promoter-TSS (NR_135540)	-97	NM_004836	9451	Hs.591589	NM_004836	ENSG00000172071	EIF2AK3	PEK|PERK|WRS	eukaryotic translation initiation factor 2 alpha kinase 3	protein-coding
10_siC_WDR5_peak_7275	chr19	14228450	14228946	+	2694	NA	promoter-TSS (NM_002730)	promoter-TSS (NM_002730)	-124	NM_002730	5566	Hs.631630	NM_002730	ENSG00000072062	PRKACA	PKACA|PPNAD4	protein kinase cAMP-activated catalytic subunit alpha	protein-coding
10_siC_WDR5_peak_2526	chr11	63952782	63954164	+	2662	NA	promoter-TSS (NM_001282653)	promoter-TSS (NM_001282653)	-170	NM_006819	10963	Hs.337295	NM_006819	ENSG00000168439	STIP1	HEL-S-94n|HOP|IEF-SSP-3521|P60|STI1|STI1L	stress induced phosphoprotein 1	protein-coding
10_siC_WDR5_peak_5605	chr16	57768994	57769985	+	2660	NA	promoter-TSS (NM_005886)	promoter-TSS (NM_005886)	-193	NM_005886	10300	Hs.275675	NM_005886	ENSG00000140854	KATNB1	KAT|LIS6	katanin regulatory subunit B1	protein-coding
10_siC_WDR5_peak_14542	chr9	6703982	6705283	+	2649	NA	Intergenic	CpG	-16231	NM_001146696	23081	Hs.709425	NM_015061	ENSG00000107077	KDM4C	GASC1|JHDM3C|JMJD2C|TDRD14C	lysine demethylase 4C	protein-coding
10_siC_WDR5_peak_300	chr1	51425145	51426385	+	2644	NA	5' UTR (NM_007051, exon 1 of 19)	5' UTR (NM_007051, exon 1 of 19)	174	NM_007051	11124	Hs.530402	NM_007051	ENSG00000185104	FAF1	CGI-03|HFAF1s|UBXD12|UBXN3A|hFAF1	Fas associated factor 1	protein-coding
10_siC_WDR5_peak_12047	chr5	179233324	179235035	+	2627	NA	promoter-TSS (NM_014275)	promoter-TSS (NM_014275)	170	NM_001142299	8878	Hs.587290	NM_003900	ENSG00000161011	SQSTM1	A170|DMRV|FTDALS3|NADGP|OSIL|PDB3|ZIP3|p60|p62|p62B	sequestosome 1	protein-coding
10_siC_WDR5_peak_2983	chr12	6960245	6962012	+	2627	NA	promoter-TSS (NM_003481)	promoter-TSS (NM_003481)	-34	NM_001297603	83461	Hs.524216	NM_031299	ENSG00000111665	CDCA3	GRCC8|TOME-1	cell division cycle associated 3	protein-coding
10_siC_WDR5_peak_7352	chr19	19496104	19496749	+	2619	NA	promoter-TSS (NM_001300946)	promoter-TSS (NM_001300946)	-186	NM_001300946	54815	Hs.118964	NM_017660	ENSG00000167491	GATAD2A	p66alpha	GATA zinc finger domain containing 2A	protein-coding
10_siC_WDR5_peak_7265	chr19	13905644	13906626	+	2616	NA	promoter-TSS (NM_001367834)	promoter-TSS (NM_001367834)	-122	NM_023072	65249	Hs.466015	NM_023072	ENSG00000132003	ZSWIM4	-	zinc finger SWIM-type containing 4	protein-coding
10_siC_WDR5_peak_15088	chr9	136282875	136284289	+	2611	NA	promoter-TSS (NM_001279350)	promoter-TSS (NM_001279350)	-290	NM_001279351	57109	Hs.438409	NM_020385	ENSG00000148300	REXO4	REX4|XPMC2|XPMC2H	REX4 homolog, 3'-5' exonuclease	protein-coding
10_siC_WDR5_peak_1853	chr10	76585643	76586745	+	2606	NA	promoter-TSS (NM_001256468)	promoter-TSS (NM_001256468)	23	NM_001256468	23522	Hs.35758	NM_012330	ENSG00000156650	KAT6B	GTPTS|MORF|MOZ2|MYST4|ZC2HC6B|qkf|querkopf	lysine acetyltransferase 6B	protein-coding
10_siC_WDR5_peak_7058	chr19	1652577	1653165	+	2600	NA	promoter-TSS (NM_001351779)	promoter-TSS (NM_001351779)	-257	NM_001351778	6929	Hs.371282	NM_003200	ENSG00000071564	TCF3	AGM8|E2A|E47|ITF1|TCF-3|VDIR|bHLHb21|p75	transcription factor 3	protein-coding
10_siC_WDR5_peak_9211	chr20	30310665	30311941	+	2589	NA	promoter-TSS (NM_138578)	promoter-TSS (NM_138578)	463	NM_001317920	598	Hs.516966	NM_001191	ENSG00000171552	BCL2L1	BCL-XL/S|BCL2L|BCLX|Bcl-X|PPP1R52	BCL2 like 1	protein-coding
10_siC_WDR5_peak_7113	chr19	4471371	4472519	+	2574	NA	promoter-TSS (NM_032631)	promoter-TSS (NM_032631)	-349	NM_032631	84717	Hs.43071	NM_032631	ENSG00000167674	HDGFL2	HDGF-2|HDGF2|HDGFRP2|HRP-2|HRP2	HDGF like 2	protein-coding
10_siC_WDR5_peak_5259	chr16	1832250	1833283	+	2564	NA	promoter-TSS (NR_104318)	promoter-TSS (NR_104318)	-194	NM_080861	90864	Hs.592080	NM_080861	ENSG00000162032	SPSB3	C16orf31|SSB3	splA/ryanodine receptor domain and SOCS box containing 3	protein-coding
10_siC_WDR5_peak_13581	chr7	100183539	100184482	+	2560	NA	promoter-TSS (NM_002319)	promoter-TSS (NM_002319)	59	NM_033506	26261	Hs.283764	NM_012172	ENSG00000106336	FBXO24	FBX24	F-box protein 24	protein-coding
10_siC_WDR5_peak_4189	chr14	23789916	23791109	+	2536	NA	promoter-TSS (NM_001360552)	promoter-TSS (NM_001360552)	-154	NM_001360551	8106	Hs.707712	NM_004643	ENSG00000100836	PABPN1	OPMD|PAB2|PABII|PABP-2|PABP2	poly(A) binding protein nuclear 1	protein-coding
10_siC_WDR5_peak_13912	chr8	2591061	2592103	+	2536	NA	Intergenic	LTR60|LTR|ERV1	-5591	NR_125425	101927815	Hs.571467	NR_125423	ENSG00000254319	LOC101927815	-	uncharacterized LOC101927815	ncRNA
10_siC_WDR5_peak_5135	chr15	89631218	89631963	+	2524	NA	promoter-TSS (NM_152924)	promoter-TSS (NM_152924)	-97	NM_152924	11057	Hs.122337	NM_007011	ENSG00000140526	ABHD2	HS1-2|LABH2|PHPS1-2	abhydrolase domain containing 2	protein-coding
10_siC_WDR5_peak_8731	chr2	178256824	178257941	+	2520	NA	promoter-TSS (NR_026966)	promoter-TSS (NR_026966)	37	NR_026966	100130691	Hs.707723	NM_182585	ENSG00000213963	LOC100130691	-	uncharacterized LOC100130691	ncRNA
10_siC_WDR5_peak_5011	chr15	75743639	75745905	+	2501	NA	promoter-TSS (NM_015477)	promoter-TSS (NM_015477)	-741	NM_015477	25942	Hs.513039	NM_015477	ENSG00000169375	SIN3A	WITKOS	SIN3 transcription regulator family member A	protein-coding
10_siC_WDR5_peak_2978	chr12	6772032	6772714	+	2456	NA	promoter-TSS (NM_001127584)	promoter-TSS (NM_001127584)	-88	NM_001127583	51147	Hs.524210	NM_016162	ENSG00000111653	ING4	my036|p29ING4	inhibitor of growth family member 4	protein-coding
10_siC_WDR5_peak_811	chr1	150601410	150602451	+	2436	NA	promoter-TSS (NM_207047)	promoter-TSS (NM_207047)	158	NM_004436	2029	Hs.632456	NM_004436	ENSG00000143420	ENSA	ARPP-19e	endosulfine alpha	protein-coding
10_siC_WDR5_peak_9795	chr22	39267514	39268329	+	2433	NA	exon (NM_001303494, exon 2 of 5)	exon (NM_001303494, exon 2 of 5)	300	NM_014292	23466	Hs.592201	NM_014292	ENSG00000183741	CBX6	-	chromobox 6	protein-coding
10_siC_WDR5_peak_8415	chr2	86667702	86668810	+	2430	NA	promoter-TSS (NM_001146688)	promoter-TSS (NM_001146688)	-238	NM_018433	55818	Hs.557425	NM_018433	ENSG00000115548	KDM3A	JHDM2A|JHMD2A|JMJD1|JMJD1A|TSGA	lysine demethylase 3A	protein-coding
10_siC_WDR5_peak_9563	chr21	40759955	40760869	+	2425	NA	intron (NM_001146218, intron 1 of 4)	L1MC4|LINE|L1	723	NM_001146218	7485	Hs.198308	NM_004627	ENSG00000182093	GET1	CHD5|WRB	guided entry of tail-anchored proteins factor 1	protein-coding
10_siC_WDR5_peak_5367	chr16	14013220	14013820	+	2424	NA	promoter-TSS (NM_005236)	promoter-TSS (NM_005236)	-494	NM_005236	2072	Hs.567265	NM_005236	ENSG00000175595	ERCC4	ERCC11|FANCQ|RAD1|XFEPS|XPF	ERCC excision repair 4, endonuclease catalytic subunit	protein-coding
10_siC_WDR5_peak_5065	chr15	80695902	80697535	+	2420	NA	promoter-TSS (NM_014862)	promoter-TSS (NM_014862)	-6	NM_014862	9915	Hs.459070	NM_014862	ENSG00000172379	ARNT2	WEDAS|bHLHe1	aryl hydrocarbon receptor nuclear translocator 2	protein-coding
10_siC_WDR5_peak_807	chr1	150459546	150460141	+	2412	NA	promoter-TSS (NR_073513)	promoter-TSS (NR_073513)	-52	NR_073514	80222	Hs.288974	NM_025150	ENSG00000143374	TARS2	COXPD21|TARSL1|thrRS	threonyl-tRNA synthetase 2, mitochondrial	protein-coding
10_siC_WDR5_peak_7293	chr19	15529452	15530232	+	2395	NA	promoter-TSS (NR_111971)	promoter-TSS (NR_111971)	-43	NM_001291478	26993	Hs.399800	NM_014371	ENSG00000011243	AKAP8L	HA95|HAP95|NAKAP|NAKAP95	A-kinase anchoring protein 8 like	protein-coding
10_siC_WDR5_peak_5610	chr16	58162836	58163861	+	2377	NA	promoter-TSS (NR_136632)	promoter-TSS (NR_136632)	-19	NR_136632	29105	Hs.532755	NM_013242	ENSG00000070761	CFAP20	BUG22|C16orf80|EVORF|GTL3|fSAP23	cilia and flagella associated protein 20	protein-coding
10_siC_WDR5_peak_9281	chr20	37075052	37075898	+	2354	NA	non-coding (NR_003239, exon 1 of 5)	non-coding (NR_003239, exon 1 of 5)	178	NR_003239	128439	Hs.16936	NM_139016	ENSG00000174365	SNHG11	C20orf198|LINC00101|NCRNA00101	small nucleolar RNA host gene 11	ncRNA
10_siC_WDR5_peak_10478	chr3	132377745	132379387	+	2350	NA	promoter-TSS (NM_001321238)	promoter-TSS (NM_001321238)	87	NM_032169	84129	Hs.441378	NM_032169	ENSG00000240303	ACAD11	ACAD-11	acyl-CoA dehydrogenase family member 11	protein-coding
10_siC_WDR5_peak_7465	chr19	37663137	37663867	+	2338	NA	promoter-TSS (NM_199126)	promoter-TSS (NM_199126)	95	NM_001288800	199704	Hs.659236	NM_152655	ENSG00000196967	ZNF585A	-	zinc finger protein 585A	protein-coding
10_siC_WDR5_peak_563	chr1	90460376	90461343	+	2323	NA	promoter-TSS (NR_002830)	promoter-TSS (NR_002830)	190	NM_182976	284695	Hs.306221	NM_181781	ENSG00000162664	ZNF326	ZAN75|ZIRD|Zfp326|dJ871E2.1	zinc finger protein 326	protein-coding
10_siC_WDR5_peak_6267	chr17	46124819	46126376	+	2322	NA	promoter-TSS (NM_003204)	promoter-TSS (NM_003204)	-124	NM_001330261	4779	Hs.514284	NM_003204	ENSG00000082641	NFE2L1	LCR-F1|NRF1|TCF11	nuclear factor, erythroid 2 like 1	protein-coding
10_siC_WDR5_peak_7680	chr19	50179467	50180915	+	2310	NA	promoter-TSS (NM_001536)	promoter-TSS (NM_001536)	-218	NM_198318	3276	Hs.20521	NM_001536	ENSG00000126457	PRMT1	ANM1|HCP1|HRMT1L2|IR1B4	protein arginine methyltransferase 1	protein-coding
10_siC_WDR5_peak_902	chr1	155903820	155905011	+	2297	NA	promoter-TSS (NM_014949)	promoter-TSS (NM_014949)	-211	NM_014949	22889	Hs.24656	NM_014949	ENSG00000132680	KHDC4	BLOM7|KIAA0907|SNORA80EHG	KH domain containing 4, pre-mRNA splicing factor	protein-coding
10_siC_WDR5_peak_9422	chr20	56784407	56785163	+	2295	NA	Intergenic	Intergenic	18924	NM_001304369	140731	Hs.266571	NM_080674	ENSG00000124227	ANKRD60	C20orf86|bA196N14.3	ankyrin repeat domain 60	protein-coding
10_siC_WDR5_peak_10947	chr4	57253011	57253946	+	2295	NA	intron (NM_001286672, intron 1 of 10)	CpG	179	NM_001323890	132949	Hs.104347	NM_181806	ENSG00000157426	AASDH	ACSF4|LYS2|NRPS1098|NRPS998	aminoadipate-semialdehyde dehydrogenase	protein-coding
10_siC_WDR5_peak_13524	chr7	92861145	92862111	+	2287	NA	promoter-TSS (NM_017667)	promoter-TSS (NM_017667)	-25	NM_001257998	55610	Hs.202424	NM_017667	ENSG00000004766	VPS50	CCDC132|VPS54L	VPS50 subunit of EARP/GARPII complex	protein-coding
10_siC_WDR5_peak_14713	chr9	73032939	73034966	+	2286	NA	Intergenic	CpG	-4379	NM_001206	687	Hs.150557	NM_001206	ENSG00000119138	KLF9	BTEB|BTEB1	Kruppel like factor 9	protein-coding
10_siC_WDR5_peak_13299	chr7	44887191	44888357	+	2283	NA	promoter-TSS (NM_201436)	promoter-TSS (NM_201436)	-49	NM_138635	94239	Hs.488189	NM_012412	ENSG00000105968	H2AFV	H2A.Z-2|H2AV	H2A histone family member V	protein-coding
10_siC_WDR5_peak_6599	chr17	73042642	73043571	+	2282	NA	promoter-TSS (NM_001003785)	promoter-TSS (NM_001003785)	-42	NM_006356	10476	Hs.514465	NM_006356	ENSG00000167863	ATP5PD	APT5H|ATP5H|ATPQ	ATP synthase peripheral stalk subunit d	protein-coding
10_siC_WDR5_peak_3828	chr12	133613658	133615125	+	2276	NA	promoter-TSS (NR_110091)	promoter-TSS (NR_110091)	223	NM_001289972	7637	Hs.445019	NM_003428	ENSG00000198040	ZNF84	HPF2	zinc finger protein 84	protein-coding
10_siC_WDR5_peak_7971	chr2	24298217	24299457	+	2276	NA	promoter-TSS (NM_001291328)	promoter-TSS (NM_001291328)	359	NM_016047	51639	Hs.177861	NM_016047	ENSG00000115128	SF3B6	CGI-110|HSPC175|Ht006|P14|SAP14|SAP14a|SF3B14|SF3B14a	splicing factor 3b subunit 6	protein-coding
10_siC_WDR5_peak_3057	chr12	21926950	21928034	+	2260	NA	5' UTR (NM_004982, exon 1 of 3)	5' UTR (NM_004982, exon 1 of 3)	148	NM_004982	3764	Hs.102308	NM_004982	ENSG00000121361	KCNJ8	KIR6.1|uKATP-1	potassium voltage-gated channel subfamily J member 8	protein-coding
10_siC_WDR5_peak_3481	chr12	93964450	93966346	+	2259	NA	promoter-TSS (NM_001270470)	promoter-TSS (NM_001270470)	-59	NM_001270470	8835	Hs.485572	NM_003877	ENSG00000120833	SOCS2	CIS2|Cish2|SOCS-2|SSI-2|SSI2|STATI2	suppressor of cytokine signaling 2	protein-coding
10_siC_WDR5_peak_6610	chr17	73452127	73453619	+	2250	NA	intron (NM_014738, intron 1 of 31)	CpG	157	NM_001351202	9772	Hs.514474	NM_014738	ENSG00000177728	TMEM94	IDDCDF|KIAA0195	transmembrane protein 94	protein-coding
10_siC_WDR5_peak_2545	chr11	64794746	64795493	+	2250	NA	intron (NM_013306, intron 1 of 7)	CpG	208	NM_013306	29907	Hs.80132	NM_013306	ENSG00000110025	SNX15	HSAF001435	sorting nexin 15	protein-coding
10_siC_WDR5_peak_7642	chr19	48972181	48973029	+	2241	NA	promoter-TSS (NM_004228)	promoter-TSS (NM_004228)	-21	NM_004228	9266	Hs.144011	NM_004228	ENSG00000105443	CYTH2	ARNO|CTS18|CTS18.1|PSCD2|PSCD2L|SEC7L|Sec7p-L|Sec7p-like|cytohesin-2	cytohesin 2	protein-coding
10_siC_WDR5_peak_7431	chr19	36119483	36120201	+	2241	NA	promoter-TSS (NM_001319113)	promoter-TSS (NM_001319113)	-76	NM_001319113	79171	Hs.5086	NM_024321	ENSG00000126254	RBM42	-	RNA binding motif protein 42	protein-coding
10_siC_WDR5_peak_812	chr1	150669388	150670063	+	2241	NA	promoter-TSS (NM_018178)	promoter-TSS (NM_018178)	-95	NM_018178	55204	Hs.203699	NM_018178	ENSG00000143457	GOLPH3L	GPP34R	golgi phosphoprotein 3 like	protein-coding
10_siC_WDR5_peak_13776	chr7	139024652	139026608	+	2231	NA	promoter-TSS (NM_197964)	promoter-TSS (NM_197964)	-248	NM_001244584	100996928	Hs.731488	NM_001244584	ENSG00000269955	FMC1-LUC7L2	C7orf55|C7orf55-LUC7L2|FMC1	FMC1-LUC7L2 readthrough	protein-coding
10_siC_WDR5_peak_5187	chr15	98503520	98504154	+	2221	NA	promoter-TSS (NM_183376)	promoter-TSS (NM_183376)	-96	NM_183376	91947	Hs.6093	NM_183376	ENSG00000140450	ARRDC4	-	arrestin domain containing 4	protein-coding
10_siC_WDR5_peak_9609	chr21	47604210	47604907	+	2218	NA	promoter-TSS (NM_032261)	promoter-TSS (NM_032261)	-185	NM_032261	84221	Hs.381214	NM_032261	ENSG00000160284	SPATC1L	C21orf56	spermatogenesis and centriole associated 1 like	protein-coding
10_siC_WDR5_peak_11867	chr5	150137869	150138727	+	2192	NA	promoter-TSS (NM_001135644)	promoter-TSS (NM_001135644)	-216	NM_001135644	51164	Hs.675564	NM_016221	ENSG00000132912	DCTN4	DYN4|P62	dynactin subunit 4	protein-coding
10_siC_WDR5_peak_1499	chr1	242011013	242011983	+	2192	NA	promoter-TSS (NM_130398)	promoter-TSS (NM_130398)	5	NM_001319224	9156	Hs.498248	NM_003686	ENSG00000174371	EXO1	HEX1|hExoI	exonuclease 1	protein-coding
10_siC_WDR5_peak_6470	chr17	61627090	61628714	+	2177	NA	promoter-TSS (NM_005828)	promoter-TSS (NM_005828)	64	NM_005828	10238	Hs.410596	NM_005828	ENSG00000136485	DCAF7	AN11|HAN11|SWAN-1|WDR68	DDB1 and CUL4 associated factor 7	protein-coding
10_siC_WDR5_peak_5943	chr17	17738981	17740027	+	2170	NA	intron (NM_001005291, intron 1 of 19)	L2b|LINE|L2	796	NM_001005291	6720	Hs.592123	NM_004176	ENSG00000072310	SREBF1	SREBP1|bHLHd1	sterol regulatory element binding transcription factor 1	protein-coding
10_siC_WDR5_peak_824	chr1	151253688	151255254	+	2157	NA	promoter-TSS (NR_135595)	promoter-TSS (NR_135595)	-66	NR_135595	100507670	Hs.225083	NR_135595	ENSG00000232671	ZNF687-AS1	-	ZNF687 antisense RNA 1	ncRNA
10_siC_WDR5_peak_10913	chr4	52708693	52709832	+	2144	NA	promoter-TSS (NM_001287757)	promoter-TSS (NM_001287757)	-57	NM_001040402	23142	Hs.605388	NM_015115	ENSG00000109184	DCUN1D4	-	defective in cullin neddylation 1 domain containing 4	protein-coding
10_siC_WDR5_peak_7248	chr19	13001574	13002217	+	2140	NA	promoter-TSS (NM_000159)	promoter-TSS (NM_000159)	-48	NR_102317	2639	Hs.532699	NM_000159	ENSG00000105607	GCDH	ACAD5|GCD	glutaryl-CoA dehydrogenase	protein-coding
10_siC_WDR5_peak_1198	chr1	203830494	203831409	+	2140	NA	promoter-TSS (NM_001328638)	promoter-TSS (NM_001328638)	-24	NM_001328638	6635	Hs.334612	NM_003094	ENSG00000182004	SNRPE	HYPT11|SME|Sm-E|snRNP-E	small nuclear ribonucleoprotein polypeptide E	protein-coding
10_siC_WDR5_peak_13582	chr7	100200589	100202427	+	2115	NA	non-coding (NR_038910, exon 1 of 9)	non-coding (NR_038910, exon 1 of 9)	153	NR_038910	100129845	Hs.714123	NR_038910	ENSG00000224729	PCOLCE-AS1	-	PCOLCE antisense RNA 1	ncRNA
10_siC_WDR5_peak_10303	chr3	88107582	88108619	+	2109	NA	promoter-TSS (NM_001350134)	promoter-TSS (NM_001350134)	46	NM_003663	8545	Hs.444818	NM_003663	ENSG00000163320	CGGBP1	CGGBP|p20-CGGBP	CGG triplet repeat binding protein 1	protein-coding
10_siC_WDR5_peak_12915	chr6	153303287	153305741	+	2107	NA	promoter-TSS (NM_012177)	promoter-TSS (NM_012177)	200	NM_001142522	26271	Hs.520506	NM_012177	ENSG00000112029	FBXO5	EMI1|FBX5|Fbxo31	F-box protein 5	protein-coding
10_siC_WDR5_peak_7993	chr2	27008269	27009117	+	2106	NA	promoter-TSS (NM_001809)	promoter-TSS (NM_001809)	-190	NM_001042426	1058	Hs.1594	NM_001809	ENSG00000115163	CENPA	CENP-A|CenH3	centromere protein A	protein-coding
10_siC_WDR5_peak_12339	chr6	32144791	32146480	+	2103	NA	promoter-TSS (NM_006913).5	promoter-TSS (NM_006913).5	250	NM_032741	10554	Hs.409230	NM_006411	ENSG00000204310	AGPAT1	1-AGPAT1|G15|LPAAT-alpha|LPAATA	1-acylglycerol-3-phosphate O-acyltransferase 1	protein-coding
10_siC_WDR5_peak_1221	chr1	205600172	205601401	+	2090	NA	5' UTR (NM_001973, exon 1 of 5)	5' UTR (NM_001973, exon 1 of 5)	1214	NM_021795	2005	Hs.497520	NM_001973	ENSG00000158711	ELK4	SAP1	ETS transcription factor ELK4	protein-coding
10_siC_WDR5_peak_5832	chr17	4870420	4871314	+	2086	NA	TTS (NM_001171168)	TTS (NM_001171168)	245	NM_004890	9552	Hs.90436	NM_004890	ENSG00000091640	SPAG7	ACRP|FSA-1	sperm associated antigen 7	protein-coding
10_siC_WDR5_peak_6436	chr17	58754447	58755410	+	2085	NA	promoter-TSS (NM_001099432)	promoter-TSS (NM_001099432)	-284	NM_017679	54828	Hs.655028	NM_017679	ENSG00000141376	BCAS3	GAOB1|MAAB	BCAS3 microtubule associated cell migration factor	protein-coding
10_siC_WDR5_peak_11905	chr5	159545972	159547143	+	2070	NA	promoter-TSS (NM_001267035)	promoter-TSS (NM_001267035)	-100	NM_001349735	114825	Hs.744960	NM_052927	ENSG00000170234	PWWP2A	MST101	PWWP domain containing 2A	protein-coding
10_siC_WDR5_peak_7143	chr19	6372351	6373188	+	2061	NA	promoter-TSS (NM_032306)	promoter-TSS (NM_032306)	-36	NM_032306	84266	Hs.111099	NM_032306	ENSG00000125652	ALKBH7	ABH7|SPATA11|UNQ6002	alkB homolog 7	protein-coding
10_siC_WDR5_peak_7681	chr19	50269592	50270517	+	2057	NA	promoter-TSS (NM_014203)	promoter-TSS (NM_014203)	-204	NM_014203	160	Hs.467125	NM_014203	ENSG00000196961	AP2A1	ADTAA|AP2-ALPHA|CLAPA1	adaptor related protein complex 2 subunit alpha 1	protein-coding
10_siC_WDR5_peak_262	chr1	44435308	44435844	+	2048	NA	promoter-TSS (NM_001384)	promoter-TSS (NM_001384)	-106	NM_001319168	1802	Hs.632398	NM_001384	ENSG00000132768	DPH2	DPH2L2	diphthamide biosynthesis 2	protein-coding
10_siC_WDR5_peak_7120	chr19	4791318	4792023	+	2045	NA	promoter-TSS (NM_018708)	promoter-TSS (NM_018708)	-76	NM_018708	55527	Hs.515082	NM_018708	ENSG00000141965	FEM1A	EPRAP	fem-1 homolog A	protein-coding
10_siC_WDR5_peak_3878	chr13	28194378	28195563	+	2033	NA	promoter-TSS (NM_001206559)	promoter-TSS (NM_001206559)	90	NM_001206559	51082	Hs.507584	NM_015972	ENSG00000186184	POLR1D	AC19|POLR1C|RPA16|RPA9|RPAC2|RPC16|RPO1-3|TCS2	RNA polymerase I and III subunit D	protein-coding
10_siC_WDR5_peak_11789	chr5	138629237	138630692	+	2025	NA	intron (NM_001194956, intron 1 of 13)	CpG	525	NM_001194955	9782	Hs.268939	NM_018834	ENSG00000015479	MATR3	ALS21|MPD2|VCPDM	matrin 3	protein-coding
10_siC_WDR5_peak_7342	chr19	19029920	19030773	+	2025	NA	promoter-TSS (NR_033677)	promoter-TSS (NR_033677)	-150	NM_007263	11316	Hs.10326	NM_007263	ENSG00000105669	COPE	epsilon-COP	coatomer protein complex subunit epsilon	protein-coding
10_siC_WDR5_peak_2989	chr12	7079156	7080306	+	2018	NA	promoter-TSS (NM_001144831)	promoter-TSS (NM_001144831)	96	NM_001144831	11331	Hs.504620	NM_001144831	ENSG00000215021	PHB2	BAP|BCAP37|Bap37|PNAS-141|REA|hBAP|p22	prohibitin 2	protein-coding
10_siC_WDR5_peak_7328	chr19	18303448	18304222	+	2007	NA	promoter-TSS (NM_032683)	promoter-TSS (NM_032683)	-193	NM_032683	84769	Hs.515254	NM_032683	ENSG00000254858	MPV17L2	FKSG24	MPV17 mitochondrial inner membrane protein like 2	protein-coding
10_siC_WDR5_peak_5496	chr16	30381342	30382747	+	1990	NA	promoter-TSS (NM_001324459)	promoter-TSS (NM_001324459)	-211	NM_001324459	29895	Hs.50889	NM_013292	ENSG00000180209	MYLPF	HUMMLC2B|MLC2B|MRLC2|MYL11	myosin light chain, phosphorylatable, fast skeletal muscle	protein-coding
10_siC_WDR5_peak_5904	chr17	11900199	11901376	+	1985	NA	promoter-TSS (NM_144680)	promoter-TSS (NM_144680)	5	NM_001303281	7566	Hs.370473	NM_144680	ENSG00000154957	ZNF18	HDSG1|KOX11|ZKSCAN6|ZNF535|ZSCAN38|Zfp535	zinc finger protein 18	protein-coding
10_siC_WDR5_peak_1471	chr1	235491026	235492620	+	1979	NA	promoter-TSS (NR_036605)	promoter-TSS (NR_036605)	-62	NR_036605	9453	Hs.730768	NM_004837	ENSG00000152904	GGPS1	GGPPS|GGPPS1	geranylgeranyl diphosphate synthase 1	protein-coding
10_siC_WDR5_peak_7496	chr19	39390203	39390891	+	1972	NA	promoter-TSS (NR_040515)	promoter-TSS (NR_040515)	-45	NM_001193286	22933	Hs.466693	NM_012237	ENSG00000068903	SIRT2	SIR2|SIR2L|SIR2L2	sirtuin 2	protein-coding
10_siC_WDR5_peak_3598	chr12	109914877	109915678	+	1970	NA	promoter-TSS (NM_001317399)	promoter-TSS (NM_001317399)	-151	NM_001270449	89910	Hs.374067	NM_130466	ENSG00000151148	UBE3B	BPIDS|KOS	ubiquitin protein ligase E3B	protein-coding
10_siC_WDR5_peak_12060	chr5	180673055	180674138	+	1968	NA	promoter-TSS (NR_109909)	promoter-TSS (NR_109909)	55	NR_109909	101928649	Hs.723307	NR_109909		CTC-338M12.4	-	uncharacterized LOC101928649	ncRNA
10_siC_WDR5_peak_15126	chr9	139780460	139781207	+	1967	NA	promoter-TSS (NM_021138)	promoter-TSS (NM_021138)	-135	NM_021138	7186	Hs.522506	NM_021138	ENSG00000127191	TRAF2	MGC:45012|RNF117|TRAP|TRAP3	TNF receptor associated factor 2	protein-coding
10_siC_WDR5_peak_7164	chr19	8454548	8455548	+	1964	NA	promoter-TSS (NR_049795)	promoter-TSS (NR_049795)	-196	NM_004218	9230	Hs.558403	NM_004218	ENSG00000185236	RAB11B	H-YPT3|NDAGSCW	RAB11B, member RAS oncogene family	protein-coding
10_siC_WDR5_peak_8120	chr2	44394780	44396411	+	1942	NA	promoter-TSS (NM_177969)	promoter-TSS (NM_177969)	-347	NM_177969	5495	Hs.416769	NM_002706	ENSG00000138032	PPM1B	PP2C-beta|PP2C-beta-X|PP2CB|PP2CBETA|PPC2BETAX	protein phosphatase, Mg2+/Mn2+ dependent 1B	protein-coding
10_siC_WDR5_peak_7302	chr19	16606705	16607350	+	1941	NA	promoter-TSS (NM_001288834)	promoter-TSS (NM_001288834)	-24	NM_145046	125972	Hs.304020	NM_145046	ENSG00000269058	CALR3	CMH19|CRT2|CT93	calreticulin 3	protein-coding
10_siC_WDR5_peak_195	chr1	33502082	33502861	+	1932	NA	promoter-TSS (NR_134976)	promoter-TSS (NR_134976)	13	NM_001319141	204	Hs.470907	NM_001625	ENSG00000004455	AK2	ADK2	adenylate kinase 2	protein-coding
10_siC_WDR5_peak_9374	chr20	48531663	48532508	+	1928	NA	promoter-TSS (NR_134564)	promoter-TSS (NR_134564)	-19	NM_006038	9825	Hs.48513	NM_006038	ENSG00000158480	SPATA2	PD1|PPP1R145|tamo	spermatogenesis associated 2	protein-coding
10_siC_WDR5_peak_10741	chr4	330716	331984	+	1925	NA	promoter-TSS (NM_001348277)	promoter-TSS (NM_001348277)	-253	NM_001348279	7700	Hs.654355	NM_003441	ENSG00000131127	ZNF141	D4S90|pHZ-44	zinc finger protein 141	protein-coding
10_siC_WDR5_peak_6300	chr17	48228182	48229804	+	1924	NA	promoter-TSS (NM_032595)	promoter-TSS (NM_032595)	-955	NM_032595	84687	Hs.514323	NM_032595	ENSG00000108819	PPP1R9B	PPP1R6|PPP1R9|SPINO|Spn	protein phosphatase 1 regulatory subunit 9B	protein-coding
10_siC_WDR5_peak_14482	chr8	145158438	145159999	+	1920	NA	promoter-TSS (NM_030974)	promoter-TSS (NM_030974)	-146	NM_032272	84232	Hs.19673	NM_032272	ENSG00000179632	MAF1	-	MAF1 homolog, negative regulator of RNA polymerase III	protein-coding
10_siC_WDR5_peak_9760	chr22	35695739	35696523	+	1916	NA	intron (NM_001135732, intron 1 of 14)	intron (NM_001135732, intron 1 of 14)	244	NR_024194	10043	Hs.474705	NM_005488	ENSG00000100284	TOM1	-	target of myb1 membrane trafficking protein	protein-coding
10_siC_WDR5_peak_1371	chr1	225840087	225841904	+	1912	NA	promoter-TSS (NM_018212)	promoter-TSS (NM_018212)	-170	NM_001008493	55740	Hs.497893	NM_018212	ENSG00000154380	ENAH	ENA|MENA|NDPP1	ENAH actin regulator	protein-coding
10_siC_WDR5_peak_9460	chr20	61592179	61592882	+	1910	NA	intron (NM_022082, intron 4 of 12)	intron (NM_022082, intron 4 of 12)	8469	NM_001302643	63910	Hs.512686	NM_022082	ENSG00000101194	SLC17A9	C20orf59|POROK8|VNUT	solute carrier family 17 member 9	protein-coding
10_siC_WDR5_peak_869	chr1	154946288	154948267	+	1904	NA	promoter-TSS (NR_036212)	promoter-TSS (NR_036212)	120	NM_001826	1163	Hs.374378	NM_001826	ENSG00000173207	CKS1B	CKS1|PNAS-16|PNAS-18|ckshs1	CDC28 protein kinase regulatory subunit 1B	protein-coding
10_siC_WDR5_peak_551	chr1	88928123	88928999	+	1903	NA	Intergenic	CpG	-221266	NM_001320707	5586	Hs.440833	NM_006256	ENSG00000065243	PKN2	PAK2|PRK2|PRKCL2|PRO2042|Pak-2|STK7	protein kinase N2	protein-coding
10_siC_WDR5_peak_6472	chr17	61698923	61700191	+	1903	NA	promoter-TSS (NM_001363768)	promoter-TSS (NM_001363768)	-220	NM_203351	4215	Hs.29282	NM_002401	ENSG00000198909	MAP3K3	MAPKKK3|MEKK3	mitogen-activated protein kinase kinase kinase 3	protein-coding
10_siC_WDR5_peak_5493	chr16	30204715	30205700	+	1900	NA	promoter-TSS (NM_178044)	promoter-TSS (NM_178044)	43	NM_001014999	548593	Hs.729791	NM_001014999	ENSG00000132207	SLX1A	GIYD1	SLX1 homolog A, structure-specific endonuclease subunit	protein-coding
10_siC_WDR5_peak_7124	chr19	4968508	4969432	+	1899	NA	promoter-TSS (NM_015015)	promoter-TSS (NM_015015)	-154	NM_001370094	23030	Hs.654816	NM_015015	ENSG00000127663	KDM4B	JMJD2B|TDRD14B	lysine demethylase 4B	protein-coding
10_siC_WDR5_peak_3266	chr12	54673088	54675587	+	1896	NA	promoter-TSS (NM_002136)	promoter-TSS (NM_002136)	-173	NR_135167	3178	Hs.546261	NM_002136	ENSG00000135486	HNRNPA1	ALS19|ALS20|HNRPA1|HNRPA1L3|IBMPFD3|UP 1|hnRNP A1|hnRNP-A1	heterogeneous nuclear ribonucleoprotein A1	protein-coding
10_siC_WDR5_peak_4169	chr14	21737122	21738425	+	1887	NA	promoter-TSS (NM_004500)	promoter-TSS (NM_004500)	-135	NM_004500	3183	Hs.508848	NM_004500	ENSG00000092199	HNRNPC	C1|C2|HNRNP|HNRPC|SNRPC	heterogeneous nuclear ribonucleoprotein C (C1/C2)	protein-coding
10_siC_WDR5_peak_14026	chr8	27168569	27169315	+	1881	NA	promoter-TSS (NM_001304495)	promoter-TSS (NM_001304495)	-53	NM_173174	2185	Hs.491322	NM_004103	ENSG00000120899	PTK2B	CADTK|CAKB|FADK2|FAK2|PKB|PTK|PYK2|RAFTK	protein tyrosine kinase 2 beta	protein-coding
10_siC_WDR5_peak_4147	chr13	113950977	113951800	+	1877	NA	promoter-TSS (NM_005561)	promoter-TSS (NM_005561)	-166	NM_005561	3916	Hs.494419	NM_005561	ENSG00000185896	LAMP1	CD107a|LAMPA|LGP120	lysosomal associated membrane protein 1	protein-coding
10_siC_WDR5_peak_15081	chr9	135905575	135906672	+	1861	NA	promoter-TSS (NM_001286709)	promoter-TSS (NM_001286709)	61	NM_001286709	9328	Hs.495417	NM_012087	ENSG00000148308	GTF3C5	TFIIIC63|TFIIICepsilon|TFiiiC2-63	general transcription factor IIIC subunit 5	protein-coding
10_siC_WDR5_peak_14289	chr8	94929457	94930922	+	1858	NA	intron (NM_001161780, intron 2 of 2)	intron (NM_001161780, intron 2 of 2)	1014	NM_001161779	54704	Hs.22265	NM_018444	ENSG00000164951	PDP1	PDH|PDP|PDPC|PPM2A|PPM2C	pyruvate dehyrogenase phosphatase catalytic subunit 1	protein-coding
10_siC_WDR5_peak_7345	chr19	19173954	19175159	+	1857	NA	promoter-TSS (NM_001321544)	promoter-TSS (NM_001321544)	-247	NM_178526	284439	Hs.303669	NM_178526	ENSG00000181035	SLC25A42	MECREN	solute carrier family 25 member 42	protein-coding
10_siC_WDR5_peak_5865	chr17	7475495	7476439	+	1856	NA	promoter-TSS (NM_001416)	promoter-TSS (NM_001416)	-176	NM_001416	1973	Hs.129673	NM_001416	ENSG00000161960	EIF4A1	DDX2A|EIF-4A|EIF4A|eIF-4A-I|eIF4A-I	eukaryotic translation initiation factor 4A1	protein-coding
10_siC_WDR5_peak_11843	chr5	145826433	145827479	+	1856	NA	promoter-TSS (NM_006706)	promoter-TSS (NM_006706)	60	NM_001040006	10915	Hs.443465	NM_006706	ENSG00000113649	TCERG1	CA150|TAF2S|Urn1	transcription elongation regulator 1	protein-coding
10_siC_WDR5_peak_12757	chr6	114291569	114293329	+	1852	NA	promoter-TSS (NR_033441)	promoter-TSS (NR_033441)	-137	NM_001527	3066	Hs.3352	NM_001527	ENSG00000196591	HDAC2	HD2|KDAC2|RPD3|YAF1	histone deacetylase 2	protein-coding
10_siC_WDR5_peak_7269	chr19	14062667	14063637	+	1849	NA	promoter-TSS (NM_138353)	promoter-TSS (NM_138353)	-134	NM_138353	90379	Hs.443636	NM_138353	ENSG00000132017	DCAF15	C19orf72	DDB1 and CUL4 associated factor 15	protein-coding
10_siC_WDR5_peak_7082	chr19	2950227	2950885	+	1849	NA	Intergenic	CpG	-5587	NM_021217	58492	Hs.38004	NM_021217	ENSG00000175691	ZNF77	pT1	zinc finger protein 77	protein-coding
10_siC_WDR5_peak_10709	chr3	195162915	195164185	+	1848	NA	exon (NM_012287, exon 1 of 23)	exon (NM_012287, exon 1 of 23)	199	NM_012287	23527	Hs.593373	NM_012287	ENSG00000114331	ACAP2	CENTB2|CNT-B2	ArfGAP with coiled-coil, ankyrin repeat and PH domains 2	protein-coding
10_siC_WDR5_peak_10735	chr3	197463458	197464587	+	1847	NA	promoter-TSS (NM_014687)	promoter-TSS (NM_014687)	-225	NM_001346873	9711	Hs.478868	NM_014687	ENSG00000145016	RUBCN	KIAA0226|RUBICON|SCAR15	rubicon autophagy regulator	protein-coding
10_siC_WDR5_peak_2100	chr10	120428765	120429524	+	1847	NA	Intergenic	Intergenic	-73984	NM_004248	2834	Hs.248119	NM_004248	ENSG00000119973	PRLHR	GPR10|GR3|PrRPR	prolactin releasing hormone receptor	protein-coding
10_siC_WDR5_peak_10860	chr4	39367384	39368261	+	1840	NA	intron (NM_001363495, intron 1 of 23)	CpG	160	NM_001363496	5981	Hs.507475	NM_002913	ENSG00000035928	RFC1	A1|CANVAS|MHCBFB|PO-GA|RECC1|RFC|RFC140	replication factor C subunit 1	protein-coding
10_siC_WDR5_peak_6295	chr17	47865745	47866942	+	1831	NA	intron (NM_001199155, intron 1 of 13)	CpG	300	NM_001199155	11143	Hs.21907	NM_007067	ENSG00000136504	KAT7	HBO1|HBOA|MYST2|ZC2HC7	lysine acetyltransferase 7	protein-coding
10_siC_WDR5_peak_2979	chr12	6797739	6799075	+	1830	NA	5' UTR (NM_133476, exon 1 of 10)	5' UTR (NM_133476, exon 1 of 10)	134	NM_133476	171017	Hs.103315	NM_133476	ENSG00000126746	ZNF384	CAGH1|CAGH1A|CIZ|ERDA2|NMP4|NP|TNRC1	zinc finger protein 384	protein-coding
10_siC_WDR5_peak_7029	chr19	796856	797955	+	1828	NA	promoter-TSS (NM_031990)	promoter-TSS (NM_031990)	-47	NM_002819	5725	Hs.172550	NM_002819	ENSG00000011304	PTBP1	HNRNP-I|HNRNPI|HNRPI|PTB|PTB-1|PTB-T|PTB2|PTB3|PTB4|pPTB	polypyrimidine tract binding protein 1	protein-coding
10_siC_WDR5_peak_3175	chr12	46661604	46663278	+	1819	NA	promoter-TSS (NM_001278390)	promoter-TSS (NM_001278390)	385	NM_001278387	81539	Hs.533770	NM_030674	ENSG00000111371	SLC38A1	ATA1|NAT2|SAT1|SNAT1	solute carrier family 38 member 1	protein-coding
10_siC_WDR5_peak_5470	chr16	29465337	29466359	+	1818	NA	promoter-TSS (NM_001039182)	promoter-TSS (NM_001039182)	26	NM_178044	79008	Hs.728161	NM_024044	ENSG00000181625	SLX1B	GIYD2	SLX1 homolog B, structure-specific endonuclease subunit	protein-coding
10_siC_WDR5_peak_4422	chr14	74724289	74725085	+	1816	NA	intron (NM_182894, intron 3 of 4)	CpG	18535	NM_182894	338917	Hs.449771	NM_182894	ENSG00000119614	VSX2	CHX10|HOX10|MCOP2|MCOPCB3|RET1	visual system homeobox 2	protein-coding
10_siC_WDR5_peak_7376	chr19	22816595	22817363	+	1806	NA	promoter-TSS (NM_020855)	promoter-TSS (NM_020855)	-147	NM_020855	57615	Hs.232108	NM_020855	ENSG00000229676	ZNF492	ZNF115	zinc finger protein 492	protein-coding
10_siC_WDR5_peak_5461	chr16	28961875	28962609	+	1803	NA	promoter-TSS (NM_032815)	promoter-TSS (NM_032815)	-76	NM_032815	84901	Hs.513470	NM_032815	ENSG00000176953	NFATC2IP	ESC2|NIP45|RAD60	nuclear factor of activated T cells 2 interacting protein	protein-coding
10_siC_WDR5_peak_6602	chr17	73149946	73151009	+	1795	NA	promoter-TSS (NM_001288609)	promoter-TSS (NM_001288609)	130	NM_001002032	51155	Hs.532803	NM_016185	ENSG00000189159	JPT1	ARM2|HN1|HN1A	Jupiter microtubule associated homolog 1	protein-coding
10_siC_WDR5_peak_1111	chr1	183440199	183441953	+	1794	NA	promoter-TSS (NM_173156)	promoter-TSS (NM_173156)	41	NR_040063	284649	Hs.127384	NR_040063	ENSG00000232860	SMG7-AS1	DKFZP564C196	SMG7 antisense RNA 1	ncRNA
10_siC_WDR5_peak_3837	chr13	20532301	20533137	+	1787	NA	promoter-TSS (NM_001353165)	promoter-TSS (NM_001353165)	-91	NM_197968	7750	Hs.507433	NM_003453	ENSG00000121741	ZMYM2	FIM|MYM|RAMP|SCLL|ZNF198	zinc finger MYM-type containing 2	protein-coding
10_siC_WDR5_peak_3267	chr12	54718445	54719290	+	1774	NA	promoter-TSS (NM_001271734)	promoter-TSS (NM_001271734)	-48	NM_016057	22818	Hs.505652	NM_016057	ENSG00000111481	COPZ1	CGI-120|COPZ|HSPC181|zeta-COP|zeta1-COP	coatomer protein complex subunit zeta 1	protein-coding
10_siC_WDR5_peak_6979	chr18	61089354	61090323	+	1763	NA	promoter-TSS (NM_004869)	promoter-TSS (NM_004869)	-129	NM_004869	9525	Hs.126550	NM_004869	ENSG00000119541	VPS4B	MIG1|SKD1|SKD1B|VPS4-2	vacuolar protein sorting 4 homolog B	protein-coding
10_siC_WDR5_peak_3191	chr12	49245539	49246228	+	1761	NA	promoter-TSS (NM_004818)	promoter-TSS (NM_004818)	63	NM_004818	9416	Hs.130098	NM_004818	ENSG00000174243	DDX23	PRPF28|SNRNP100|U5-100K|U5-100KD|prp28	DEAD-box helicase 23	protein-coding
10_siC_WDR5_peak_10356	chr3	111697252	111698297	+	1755	NA	promoter-TSS (NM_001272069)	promoter-TSS (NM_001272069)	-99	NM_018394	55347	Hs.477115	NM_018394	ENSG00000144827	ABHD10	-	abhydrolase domain containing 10	protein-coding
10_siC_WDR5_peak_6608	chr17	73389754	73390530	+	1754	NA	intron (NM_203506, intron 1 of 4)	intron (NM_203506, intron 1 of 4)	11617	NM_002086	2885	Hs.444356	NM_002086	ENSG00000177885	GRB2	ASH|EGFRBP-GRB2|Grb3-3|MST084|MSTP084|NCKAP2	growth factor receptor bound protein 2	protein-coding
10_siC_WDR5_peak_7322	chr19	17970357	17971132	+	1754	NA	promoter-TSS (NM_000980)	promoter-TSS (NM_000980)	25	NM_000980	6142	Hs.337766	NM_000980	ENSG00000105640	RPL18A	L18A	ribosomal protein L18a	protein-coding
10_siC_WDR5_peak_6545	chr17	70470842	70471265	+	1753	NA	intron (NR_137281, intron 1 of 4)	intron (NR_137281, intron 1 of 4)	117890	NR_152516	100499467	Hs.157726	NR_036488	ENSG00000227036	LINC00673	ERRLR01|HI-LNC75|HILNC75|LUCAIR1|SLNCR|SLNCR1	long intergenic non-protein coding RNA 673	ncRNA
10_siC_WDR5_peak_9269	chr20	35723798	35724868	+	1753	NA	promoter-TSS (NM_002895)	promoter-TSS (NM_002895)	67	NM_001323281	5933	Hs.207745	NM_002895	ENSG00000080839	RBL1	CP107|PRB1|p107	RB transcriptional corepressor like 1	protein-coding
10_siC_WDR5_peak_6615	chr17	73780307	73781791	+	1752	NA	promoter-TSS (NR_039892)	promoter-TSS (NR_039892)	129	NR_038131	85451	Hs.584768	NM_001080419	ENSG00000132478	UNK	UNKEMPT|ZC3H5|ZC3HDC5	unk zinc finger	protein-coding
10_siC_WDR5_peak_8533	chr2	120770299	120771281	+	1751	NA	5' UTR (NM_001184938, exon 1 of 17)	5' UTR (NM_001184938, exon 1 of 17)	137	NM_001330307	57669	Hs.369232	NM_020909	ENSG00000115109	EPB41L5	BE37|YMO1|YRT	erythrocyte membrane protein band 4.1 like 5	protein-coding
10_siC_WDR5_peak_6179	chr17	41984715	41985712	+	1751	NA	promoter-TSS (NM_005374)	promoter-TSS (NM_005374)	97	NM_001278381	4355	Hs.514208	NM_005374	ENSG00000108852	MPP2	DLG2	membrane palmitoylated protein 2	protein-coding
10_siC_WDR5_peak_9506	chr21	30364878	30365635	+	1745	NA	promoter-TSS (NM_001320766)	promoter-TSS (NM_001320766)	-58	NM_015565	26046	Hs.288773	NM_015565	ENSG00000198862	LTN1	C21orf10|C21orf98|RNF160|ZNF294	listerin E3 ubiquitin protein ligase 1	protein-coding
10_siC_WDR5_peak_3311	chr12	57039415	57040287	+	1738	NA	promoter-TSS (NR_002737)	promoter-TSS (NR_002737)	-83	NM_001686	506	Hs.406510	NM_001686	ENSG00000110955	ATP5F1B	ATP5B|ATPMB|ATPSB|HEL-S-271	ATP synthase F1 subunit beta	protein-coding
10_siC_WDR5_peak_12127	chr6	9398263	9399496	+	1735	NA	Intergenic	Intergenic	746437	NR_004855	728655	Hs.214343	NR_004855		HULC	HCCAT1|LINC00078|NCRNA00078	hepatocellular carcinoma up-regulated long non-coding RNA	ncRNA
10_siC_WDR5_peak_5284	chr16	2732165	2732753	+	1733	NA	promoter-TSS (NM_018992)	promoter-TSS (NM_018992)	-65	NM_018992	54442	Hs.61960	NM_018992	ENSG00000167977	KCTD5	-	potassium channel tetramerization domain containing 5	protein-coding
10_siC_WDR5_peak_6730	chr17	79980509	79981432	+	1732	NA	promoter-TSS (NM_144999)	promoter-TSS (NM_144999)	-211	NM_144999	201255	Hs.143774	NM_144999	ENSG00000169683	LRRC45	-	leucine rich repeat containing 45	protein-coding
10_siC_WDR5_peak_5834	chr17	4900832	4901269	+	1728	NA	promoter-TSS (NM_001167987)	promoter-TSS (NM_001167987)	-145	NM_213726	388324	Hs.658926	NM_213726	ENSG00000196388	INCA1	HSD45	inhibitor of CDK, cyclin A1 interacting protein 1	protein-coding
10_siC_WDR5_peak_6519	chr17	66031478	66032440	+	1724	NA	promoter-TSS (NM_001320611)	promoter-TSS (NM_001320611)	108	NM_002266	3838	Hs.594238	NM_002266	ENSG00000182481	KPNA2	IPOA1|QIP2|RCH1|SRP1-alpha|SRP1alpha	karyopherin subunit alpha 2	protein-coding
10_siC_WDR5_peak_9920	chr3	4508550	4509169	+	1716	NA	promoter-TSS (NM_182760)	promoter-TSS (NM_182760)	94	NM_182760	285362	Hs.350475	NM_182760	ENSG00000144455	SUMF1	AAPA3037|FGE|UNQ3037	sulfatase modifying factor 1	protein-coding
10_siC_WDR5_peak_5269	chr16	2205103	2206016	+	1714	NA	promoter-TSS (NR_132114)	promoter-TSS (NR_132114)	-200	NR_132114	100507303	Hs.369728	NR_132114	ENSG00000260260	SNHG19	SNORD60HG	small nucleolar RNA host gene 19	ncRNA
10_siC_WDR5_peak_7041	chr19	1248228	1249969	+	1709	NA	intron (NM_177401, intron 1 of 7)	CpG	546	NM_177401	90007	Hs.465529	NM_177401	ENSG00000167470	MIDN	-	midnolin	protein-coding
10_siC_WDR5_peak_6220	chr17	43238313	43239355	+	1708	NA	promoter-TSS (NM_001303442)	promoter-TSS (NM_001303442)	-378	NM_001303440	124790	Hs.56382	NM_144608	ENSG00000168517	HEXIM2	L3	HEXIM P-TEFb complex subunit 2	protein-coding
10_siC_WDR5_peak_8442	chr2	97523573	97524114	+	1705	NA	promoter-TSS (NM_016466)	promoter-TSS (NM_016466)	-90	NM_016466	51239	Hs.709507	NM_016466	ENSG00000213337	ANKRD39	-	ankyrin repeat domain 39	protein-coding
10_siC_WDR5_peak_15246	chrX	49047321	49048211	+	1698	NA	intron (NM_003179, intron 6 of 6)	intron (NM_003179, intron 6 of 6)	-4940	NM_006150	4007	Hs.732712	NM_006150	ENSG00000012211	PRICKLE3	LMO6|Pk3	prickle planar cell polarity protein 3	protein-coding
10_siC_WDR5_peak_4952	chr15	70678829	70679599	+	1688	NA	Intergenic	Intergenic	119053	NR_146562	105370880		NR_146562	ENSG00000259473	LINC02205	-	long intergenic non-protein coding RNA 2205	ncRNA
10_siC_WDR5_peak_6254	chr17	45726452	45728454	+	1687	NA	promoter-TSS (NM_001276453)	promoter-TSS (NM_001276453)	168	NM_002265	3837	Hs.532793	NM_002265	ENSG00000108424	KPNB1	IMB1|IPO1|IPOB|Impnb|NTF97	karyopherin subunit beta 1	protein-coding
10_siC_WDR5_peak_13297	chr7	44645970	44646950	+	1679	NA	intron (NM_001165036, intron 1 of 22)	CpG	234	NM_001003941	4967	Hs.488181	NM_002541	ENSG00000105953	OGDH	AKGDH|E1k|OGDC	oxoglutarate dehydrogenase	protein-coding
10_siC_WDR5_peak_6318	chr17	48784578	48785459	+	1677	NA	5' UTR (NM_052855, exon 1 of 5)	5' UTR (NM_052855, exon 1 of 5)	257	NM_052855	91369	Hs.463426	NM_052855	ENSG00000154945	ANKRD40	-	ankyrin repeat domain 40	protein-coding
10_siC_WDR5_peak_6404	chr17	56083694	56085451	+	1676	NA	promoter-TSS (NM_006924)	promoter-TSS (NM_006924)	35	NM_006924	6426	Hs.68714	NM_006924	ENSG00000136450	SRSF1	ASF|SF2|SF2p33|SFRS1|SRp30a	serine and arginine rich splicing factor 1	protein-coding
10_siC_WDR5_peak_4733	chr15	44487220	44487974	+	1674	NA	promoter-TSS (NR_104455)	promoter-TSS (NR_104455)	-105	NR_104455	84978	Hs.578544	NM_032892	ENSG00000171877	FRMD5	-	FERM domain containing 5	protein-coding
10_siC_WDR5_peak_3419	chr12	75904944	75905809	+	1670	NA	promoter-TSS (NM_007043)	promoter-TSS (NM_007043)	13	NM_007043	11103	Hs.645517	NM_007043	ENSG00000111615	KRR1	HRB2|RIP-1	KRR1 small subunit processome component homolog	protein-coding
10_siC_WDR5_peak_8946	chr2	220094117	220094730	+	1670	NA	promoter-TSS (NM_001042410)	promoter-TSS (NM_001042410)	-65	NM_024085	79065	Hs.323363	NM_024085	ENSG00000198925	ATG9A	APG9L1|MGD3208|mATG9	autophagy related 9A	protein-coding
10_siC_WDR5_peak_7183	chr19	9945503	9946202	+	1663	NA	promoter-TSS (NR_038830)	promoter-TSS (NR_038830)	-31	NR_038422	5300	Hs.465849	NM_006221	ENSG00000127445	PIN1	DOD|UBL5	peptidylprolyl cis/trans isomerase, NIMA-interacting 1	protein-coding
10_siC_WDR5_peak_7748	chr19	55850340	55851485	+	1656	NA	promoter-TSS (NM_032701)	promoter-TSS (NM_032701)	-332	NM_032701	84787	Hs.590982	NM_032701	ENSG00000133247	KMT5C	SUV420H2|Suv4-20h2	lysine methyltransferase 5C	protein-coding
10_siC_WDR5_peak_1162	chr1	200980784	200981219	+	1654	NA	intron (NM_017596, intron 1 of 33)	intron (NM_017596, intron 1 of 33)	11841	NM_001252103	23046	Hs.169182	NM_017596	ENSG00000116852	KIF21B	-	kinesin family member 21B	protein-coding
10_siC_WDR5_peak_10456	chr3	128879598	128880556	+	1654	NA	promoter-TSS (NM_020701)	promoter-TSS (NM_020701)	-4	NM_001204890	100534599	Hs.512661	NM_001204890	ENSG00000261796	ISY1-RAB43	ISY1	ISY1-RAB43 readthrough	protein-coding
10_siC_WDR5_peak_9882	chr22	46731236	46731932	+	1653	NA	promoter-TSS (NM_001282782)	promoter-TSS (NM_001282782)	-27	NM_001282784	55687	Hs.439524	NM_018006	ENSG00000100416	TRMU	LCAL3|MTO2|MTU1|TRMT|TRMT1	tRNA 5-methylaminomethyl-2-thiouridylate methyltransferase	protein-coding
10_siC_WDR5_peak_10382	chr3	119216848	119217642	+	1653	NA	promoter-TSS (NM_016589)	promoter-TSS (NM_016589)	-149	NM_016589	51300	Hs.477287	NM_016589	ENSG00000113845	TIMMDC1	C3orf1|MC1DN31	translocase of inner mitochondrial membrane domain containing 1	protein-coding
10_siC_WDR5_peak_5569	chr16	50775499	50776295	+	1653	NA	promoter-TSS (NM_001042412)	promoter-TSS (NM_001042412)	-64	NM_015247	1540	Hs.578973	NM_015247	ENSG00000083799	CYLD	BRSS|CDMT|CYLD1|CYLDI|EAC|MFT|MFT1|SBS|TEM|USPL2	CYLD lysine 63 deubiquitinase	protein-coding
10_siC_WDR5_peak_12679	chr6	105307116	105307931	+	1647	NA	promoter-TSS (NM_001321083)	promoter-TSS (NM_001321083)	-102	NM_001321083	57531	Hs.434340	NM_020771	ENSG00000085382	HACE1	SPPRS	HECT domain and ankyrin repeat containing E3 ubiquitin protein ligase 1	protein-coding
10_siC_WDR5_peak_4542	chr14	96000688	96001640	+	1645	NA	promoter-TSS (NR_001459)	promoter-TSS (NR_001459)	45	NR_003138	283596	Hs.448753	NR_001459		SNHG10	C14orf62|LINC00063|NCRNA00063	small nucleolar RNA host gene 10	ncRNA
10_siC_WDR5_peak_70	chr1	11322353	11323077	+	1642	NA	promoter-TSS (NM_004958)	promoter-TSS (NM_004958)	-107	NM_004958	2475	Hs.338207	NM_004958	ENSG00000198793	MTOR	FRAP|FRAP1|FRAP2|RAFT1|RAPT1|SKS	mechanistic target of rapamycin kinase	protein-coding
10_siC_WDR5_peak_10053	chr3	37034762	37035442	+	1640	NA	promoter-TSS (NM_014805)	promoter-TSS (NM_014805)	261	NM_001354621	4292	Hs.195364	NM_000249	ENSG00000076242	MLH1	COCA2|FCC2|HNPCC|HNPCC2|hMLH1	mutL homolog 1	protein-coding
10_siC_WDR5_peak_8992	chr2	232571532	232572486	+	1640	NA	Intergenic	CpG	-1226	NM_002823	5757	Hs.459927	NM_002823	ENSG00000187514	PTMA	TMSA	prothymosin alpha	protein-coding
10_siC_WDR5_peak_6471	chr17	61678028	61678620	+	1639	NA	promoter-TSS (NM_016360)	promoter-TSS (NM_016360)	70	NM_016360	51204	Hs.174134	NM_016360	ENSG00000136463	TACO1	CCDC44	translational activator of cytochrome c oxidase I	protein-coding
10_siC_WDR5_peak_15248	chrX	49125328	49126724	+	1637	NA	promoter-TSS (NM_033215)	promoter-TSS (NM_033215)	-230	NM_001184745	89801	Hs.433652	NM_033215	ENSG00000049769	PPP1R3F	HB2E|LL0XNC01-7P3.1|R3F	protein phosphatase 1 regulatory subunit 3F	protein-coding
10_siC_WDR5_peak_2496	chr11	62438144	62439396	+	1627	NA	promoter-TSS (NM_001085372)	promoter-TSS (NM_001085372)	-375	NM_001085372	790955	Hs.569009	NM_001085372	ENSG00000204922	UQCC3	C11orf83|CCDS41658.1|MC3DN9|UNQ655	ubiquinol-cytochrome c reductase complex assembly factor 3	protein-coding
10_siC_WDR5_peak_11986	chr5	172483896	172484560	+	1625	NA	intron (NM_001168393, intron 1 of 3)	CpG	873	NM_001168393	153222	Hs.484195	NM_153607	ENSG00000164463	CREBRF	C5orf41|LRF	CREB3 regulatory factor	protein-coding
10_siC_WDR5_peak_7433	chr19	36193162	36193755	+	1621	NA	Intergenic	CpG	-2002	NM_001316903	27033	Hs.99430	NM_014383	ENSG00000011590	ZBTB32	FAXF|FAZF|Rog|TZFP|ZNF538	zinc finger and BTB domain containing 32	protein-coding
10_siC_WDR5_peak_13341	chr7	63386217	63387191	+	1620	NA	Intergenic	CpG	-72480	NR_145488	100419780	Hs.742917	NR_145488		ZNF722P	ZNF722	zinc finger protein 722, pseudogene	pseudo
10_siC_WDR5_peak_7753	chr19	55972658	55973577	+	1618	NA	promoter-TSS (NM_024710)	promoter-TSS (NM_024710)	-108	NM_001136202	79763	Hs.467306	NM_024710	ENSG00000063241	ISOC2	-	isochorismatase domain containing 2	protein-coding
10_siC_WDR5_peak_8310	chr2	71453963	71454762	+	1616	NA	promoter-TSS (NM_020459)	promoter-TSS (NM_020459)	-129	NM_020459	400961	Hs.416735	NM_020459	ENSG00000124374	PAIP2B	-	poly(A) binding protein interacting protein 2B	protein-coding
10_siC_WDR5_peak_10555	chr3	156272679	156273275	+	1614	NA	promoter-TSS (NM_001308204)	promoter-TSS (NM_001308204)	12	NM_001308197	6747	Hs.518346	NM_007107	ENSG00000114850	SSR3	TRAPG	signal sequence receptor subunit 3	protein-coding
10_siC_WDR5_peak_11989	chr5	173043016	173044030	+	1612	NA	5' UTR (NM_138369, exon 1 of 4)	5' UTR (NM_138369, exon 1 of 4)	130	NM_138369	91272	Hs.425091	NM_138369	ENSG00000145919	BOD1	FAM44B	biorientation of chromosomes in cell division 1	protein-coding
10_siC_WDR5_peak_4463	chr14	77923550	77924856	+	1607	NA	promoter-TSS (NM_001193314)	promoter-TSS (NM_001193314)	-7	NM_001321441	10598	Hs.204041	NM_012111	ENSG00000100591	AHSA1	AHA1|C14orf3|hAha1|p38	activator of HSP90 ATPase activity 1	protein-coding
10_siC_WDR5_peak_7233	chr19	12661821	12662748	+	1605	NA	promoter-TSS (NM_144976)	promoter-TSS (NM_144976)	12	NM_144976	163050	Hs.655615	NM_144976	ENSG00000249709	ZNF564	-	zinc finger protein 564	protein-coding
10_siC_WDR5_peak_6421	chr17	57230999	57233393	+	1604	NA	promoter-TSS (NM_018304)	promoter-TSS (NM_018304)	351	NM_001330399	348235	Hs.463607	NM_182620	ENSG00000182628	SKA2	FAM33A	spindle and kinetochore associated complex subunit 2	protein-coding
10_siC_WDR5_peak_12021	chr5	176852873	176854118	+	1604	NA	promoter-TSS (NM_002082)	promoter-TSS (NM_002082)	-182	NM_001004105	2870	Hs.235116	NM_002082	ENSG00000198055	GRK6	GPRK6	G protein-coupled receptor kinase 6	protein-coding
10_siC_WDR5_peak_5981	chr17	21117212	21118012	+	1603	NA	non-coding (NR_024547, exon 1 of 3)	non-coding (NR_024547, exon 1 of 3)	296	NR_024547	8834	Hs.592945	NM_003876	ENSG00000178307	TMEM11	C17orf35|PM1|PMI	transmembrane protein 11	protein-coding
10_siC_WDR5_peak_3823	chr12	133405204	133405988	+	1601	NA	promoter-TSS (NM_001172557)	promoter-TSS (NM_001172557)	-141	NM_001172557	2802	Hs.507333	NM_005895	ENSG00000090615	GOLGA3	GCP170|MEA-2	golgin A3	protein-coding
10_siC_WDR5_peak_13037	chr7	2883856	2884556	+	1598	NA	promoter-TSS (NM_001293092)	promoter-TSS (NM_001293092)	-264	NM_007353	2768	Hs.487341	NM_007353	ENSG00000146535	GNA12	NNX3|RMP|gep	G protein subunit alpha 12	protein-coding
10_siC_WDR5_peak_8508	chr2	113032801	113033443	+	1596	NA	promoter-TSS (NM_198581)	promoter-TSS (NM_198581)	-52	NM_198581	376940	Hs.190477	NM_198581	ENSG00000188177	ZC3H6	ZC3HDC6	zinc finger CCCH-type containing 6	protein-coding
10_siC_WDR5_peak_6782	chr18	8706951	8707905	+	1593	NA	non-coding (NR_120598, exon 1 of 2)	non-coding (NR_120598, exon 1 of 2)	191	NR_120598	100287082	Hs.439434	NR_120598	ENSG00000265962	GACAT2	MTCL1-AS1|MTCL1AS1	gastric cancer associated transcript 2	ncRNA
10_siC_WDR5_peak_7141	chr19	6279864	6280382	+	1588	NA	promoter-TSS (NM_005934)	promoter-TSS (NM_005934)	-137	NM_005934	4298	Hs.10095	NM_005934	ENSG00000130382	MLLT1	ENL|LTG19|YEATS1	MLLT1 super elongation complex subunit	protein-coding
10_siC_WDR5_peak_5893	chr17	8533856	8534754	+	1588	NA	promoter-TSS (NM_001256095)	promoter-TSS (NM_001256095)	-226	NM_001256095	4628	Hs.16355	NM_005964	ENSG00000133026	MYH10	NMMHC-IIB|NMMHCB	myosin heavy chain 10	protein-coding
10_siC_WDR5_peak_12805	chr6	126549330	126549962	+	1585	NA	Intergenic	Intergenic	-111289	NM_001012507	387103	Hs.486401	NM_001012507	ENSG00000203760	CENPW	C6orf173|CENP-W|CUG2	centromere protein W	protein-coding
10_siC_WDR5_peak_7533	chr19	41769351	41770694	+	1583	NA	promoter-TSS (NM_001301016)	promoter-TSS (NM_001301016)	-255	NM_007040	11100	Hs.155218	NM_007040	ENSG00000105323	HNRNPUL1	E1B-AP5|E1BAP5|HNRPUL1	heterogeneous nuclear ribonucleoprotein U like 1	protein-coding
10_siC_WDR5_peak_4411	chr14	73924939	73925668	+	1581	NA	promoter-TSS (NM_003744)	promoter-TSS (NM_003744)	-17	NM_001005744	8650	Hs.525443	NM_003744	ENSG00000133961	NUMB	C14orf41|S171|c14_5527	NUMB endocytic adaptor protein	protein-coding
10_siC_WDR5_peak_6414	chr17	56594935	56596314	+	1581	NA	promoter-TSS (NM_004687)	promoter-TSS (NM_004687)	-383	NM_004687	9110	Hs.514373	NM_004687	ENSG00000108389	MTMR4	FYVE-DSP2|ZFYVE11	myotubularin related protein 4	protein-coding
10_siC_WDR5_peak_10801	chr4	7379012	7379692	+	1579	NA	intron (NM_020777, intron 1 of 26)	intron (NM_020777, intron 1 of 26)	57305	NM_001085382	768239	Hs.662523	NM_001085382	ENSG00000178597	PSAPL1	-	prosaposin like 1 (gene/pseudogene)	protein-coding
10_siC_WDR5_peak_10446	chr3	127842237	127843237	+	1575	NA	promoter-TSS (NM_003707)	promoter-TSS (NM_003707)	-82	NM_001319084	8607	Hs.272822	NM_003707	ENSG00000175792	RUVBL1	ECP-54|ECP54|INO80H|NMP 238|NMP238|PONTIN|Pontin52|RVB1|TIH1|TIP49|TIP49A	RuvB like AAA ATPase 1	protein-coding
10_siC_WDR5_peak_8954	chr2	220461800	220462963	+	1569	NA	promoter-TSS (NM_052902)	promoter-TSS (NM_052902)	-198	NM_052902	114790	Hs.22410	NM_052902	ENSG00000144589	STK11IP	LIP1|LKB1IP|STK11IP1	serine/threonine kinase 11 interacting protein	protein-coding
10_siC_WDR5_peak_10463	chr3	129117375	129118681	+	1566	NA	non-coding (NR_003111, exon 1 of 4)	non-coding (NR_003111, exon 1 of 4)	254	NR_003111	132241	Hs.477537	NR_003111	ENSG00000251474	RPL32P3	-	ribosomal protein L32 pseudogene 3	pseudo
10_siC_WDR5_peak_14801	chr9	96927974	96929455	+	1563	NA	Intergenic	CpG	-9525	NR_029476	406881		NR_029476	ENSG00000199165	MIRLET7A1	LET7A1|MIRNLET7A1|let-7a-1	microRNA let-7a-1	ncRNA
10_siC_WDR5_peak_7738	chr19	54663160	54664028	+	1563	NA	promoter-TSS (NM_024316)	promoter-TSS (NM_024316)	-135	NM_024316	79165	Hs.590974	NM_024316	ENSG00000105617	LENG1	-	leukocyte receptor cluster member 1	protein-coding
10_siC_WDR5_peak_800	chr1	150208272	150208971	+	1554	NA	promoter-TSS (NM_001280559)	promoter-TSS (NM_001280559)	-161	NM_030920	81611	Hs.656466	NM_030920	ENSG00000143401	ANP32E	LANP-L|LANPL	acidic nuclear phosphoprotein 32 family member E	protein-coding
10_siC_WDR5_peak_2965	chr12	4647337	4648314	+	1551	NA	promoter-TSS (NM_001130862)	promoter-TSS (NM_001130862)	-151	NM_001346157	57102	Hs.302977	NM_020374	ENSG00000047621	C12orf4	-	chromosome 12 open reading frame 4	protein-coding
10_siC_WDR5_peak_6247	chr17	45177251	45178032	+	1548	NA	Intergenic	CpG	-40126	NM_001363805	100506084	Hs.559259	NM_001039083	ENSG00000228696	ARL17B	ARL17|ARL17A	ADP ribosylation factor like GTPase 17B	protein-coding
10_siC_WDR5_peak_13724	chr7	132766402	132767189	+	1548	NA	promoter-TSS (NM_017812)	promoter-TSS (NM_017812)	55	NM_017812	54927	Hs.655010	NM_017812	ENSG00000106554	CHCHD3	MICOS19|MINOS3|Mic19|PPP1R22	coiled-coil-helix-coiled-coil-helix domain containing 3	protein-coding
10_siC_WDR5_peak_14842	chr9	100684333	100684848	+	1543	NA	intron (NM_001330725, intron 1 of 5)	CpG	262	NM_001330725	51531	Hs.9196	NM_016481	ENSG00000136932	TRMO	C9orf156|HSPC219|NAP1	tRNA methyltransferase O	protein-coding
10_siC_WDR5_peak_9471	chr20	62587402	62588080	+	1542	NA	promoter-TSS (NR_148442)	promoter-TSS (NR_148442)	28	NM_001353477	54963	Hs.504998	NM_017859	ENSG00000198276	UCKL1	UCK1L|URKL1	uridine-cytidine kinase 1 like 1	protein-coding
10_siC_WDR5_peak_9686	chr22	24255809	24256826	+	1542	NA	Intergenic	CpG	-15200	NR_038911	284889	Hs.632772	NR_038911		MIF-AS1	MIF-AS	MIF antisense RNA 1	ncRNA
10_siC_WDR5_peak_2757	chr11	107798489	107799605	+	1541	NA	promoter-TSS (NM_017516)	promoter-TSS (NM_017516)	-127	NM_017516	54734	Hs.354906	NM_017516	ENSG00000179331	RAB39A	RAB39	RAB39A, member RAS oncogene family	protein-coding
10_siC_WDR5_peak_15087	chr9	136242492	136243481	+	1540	NA	promoter-TSS (NM_001280790)	promoter-TSS (NM_001280790)	51	NM_001280791	6836	Hs.512465	NM_033161	ENSG00000148248	SURF4	ERV29	surfeit 4	protein-coding
10_siC_WDR5_peak_7620	chr19	47353680	47354496	+	1536	NA	promoter-TSS (NM_004069)	promoter-TSS (NM_004069)	15	NM_021575	1175	Hs.119591	NM_004069	ENSG00000042753	AP2S1	AP17|CLAPS2|FBH3|FBHOk|HHC3	adaptor related protein complex 2 subunit sigma 1	protein-coding
10_siC_WDR5_peak_4341	chr14	60631288	60632337	+	1536	NA	intron (NM_001322280, intron 1 of 6)	CpG	304	NM_016029	51635	Hs.59719	NM_016029	ENSG00000100612	DHRS7	CGI-86|SDR34C1|retDSR4|retSDR4	dehydrogenase/reductase 7	protein-coding
10_siC_WDR5_peak_6226	chr17	43697295	43698386	+	1529	NA	promoter-TSS (NR_027295)	promoter-TSS (NR_027295)	128	NM_001256299	104909134		NM_001256299	ENSG00000263715	LINC02210-CRHR1	CRHR1-IT1-CRHR1|MGC57346-CRHR1	LINC02210-CRHR1 readthrough	protein-coding
10_siC_WDR5_peak_3835	chr13	20437233	20438489	+	1529	NA	promoter-TSS (NM_001142684)	promoter-TSS (NM_001142684)	-72	NM_001142684	9205	Hs.530988	NM_014242	ENSG00000132950	ZMYM5	HSPC050|MYM|ZNF198L1|ZNF237	zinc finger MYM-type containing 5	protein-coding
10_siC_WDR5_peak_1036	chr1	171750272	171751082	+	1529	NA	promoter-TSS (NM_015935)	promoter-TSS (NM_015935)	-123	NM_014955	51603	Hs.494705	NM_014955	ENSG00000010165	EEF1AKNMT	5630401D24Rik|CGI-01|DFNB26|DFNB26M|KIAA0859|METTL13|feat	eEF1A lysine and N-terminal methyltransferase	protein-coding
10_siC_WDR5_peak_4191	chr14	23938224	23939364	+	1528	NA	promoter-TSS (NM_015514)	promoter-TSS (NM_015514)	-118	NM_015514	25983	Hs.9043	NM_015514	ENSG00000129460	NGDN	C14orf120|CANu1|LCP5|NGD|lpd-2	neuroguidin	protein-coding
10_siC_WDR5_peak_2115	chr10	121137056	121137813	+	1526	NA	promoter-TSS (NR_039829)	promoter-TSS (NR_039829)	-50	NR_039829	100616398		NR_039829	ENSG00000265719	MIR4681	-	microRNA 4681	ncRNA
10_siC_WDR5_peak_835	chr1	151762718	151763834	+	1517	NA	promoter-TSS (NM_001083964)	promoter-TSS (NM_001083964)	51	NR_146293	109729141	Hs.439525	NR_146292	ENSG00000203288	TDRKH-AS1	-	TDRKH antisense RNA 1	ncRNA
10_siC_WDR5_peak_4890	chr15	66161416	66162232	+	1514	NA	promoter-TSS (NM_001206836)	promoter-TSS (NM_001206836)	-5	NM_001206836	8766	Hs.321541	NM_004663	ENSG00000103769	RAB11A	YL8	RAB11A, member RAS oncogene family	protein-coding
10_siC_WDR5_peak_7779	chr19	57751659	57752413	+	1506	NA	promoter-TSS (NM_001145078)	promoter-TSS (NM_001145078)	36	NM_001145078	390980	Hs.22488	NM_001023563	ENSG00000204524	ZNF805	-	zinc finger protein 805	protein-coding
10_siC_WDR5_peak_14627	chr9	34988936	34990053	+	1506	NA	promoter-TSS (NM_001135004)	promoter-TSS (NM_001135004)	-118	NR_109756	101926900	Hs.545814	NR_109756	ENSG00000281491	DNAJB5-DT	DNAJB5-AS1	DNAJB5 divergent transcript	ncRNA
10_siC_WDR5_peak_15136	chr9	140134918	140136040	+	1505	NA	promoter-TSS (NM_006088)	promoter-TSS (NM_006088)	-260	NM_006088	10383	Hs.433615	NM_006088	ENSG00000188229	TUBB4B	Beta2|LCAEOD|TUBB2|TUBB2C	tubulin beta 4B class IVb	protein-coding
10_siC_WDR5_peak_11977	chr5	171433138	171434239	+	1502	NA	5' UTR (NM_033645, exon 1 of 12)	5' UTR (NM_033645, exon 1 of 12)	189	NM_033645	23291	Hs.484138	NM_012300	ENSG00000072803	FBXW11	BTRC2|BTRCP2|FBW1B|FBXW1B|Fbw11|Hos	F-box and WD repeat domain containing 11	protein-coding
10_siC_WDR5_peak_7272	chr19	14191893	14192491	+	1501	NA	TTS (NM_001277378)	TTS (NM_001277378)	4403	NM_001277378	646457	Hs.569971	NM_001277378	ENSG00000188032	C19orf67	-	chromosome 19 open reading frame 67	protein-coding
10_siC_WDR5_peak_718	chr1	116512141	116512550	+	1501	NA	intron (NR_125970, intron 1 of 4)	intron (NR_125970, intron 1 of 4)	-6789	NM_018420	55356	Hs.125482	NM_018420	ENSG00000163393	SLC22A15	FLIPT1|PRO34686	solute carrier family 22 member 15	protein-coding
10_siC_WDR5_peak_3271	chr12	54752710	54753327	+	1500	NA	intron (NR_120487, intron 1 of 3)	intron (NR_120487, intron 1 of 3)	5252	NM_020370	53831	Hs.306199	NM_020370	ENSG00000139572	GPR84	EX33|GPCR4	G protein-coupled receptor 84	protein-coding
10_siC_WDR5_peak_1210	chr1	205090971	205091615	+	1498	NA	promoter-TSS (NM_001193272)	promoter-TSS (NM_001193272)	-187	NM_001193273	5929	Hs.519230	NM_005057	ENSG00000117222	RBBP5	RBQ3|SWD1	RB binding protein 5, histone lysine methyltransferase complex subunit	protein-coding
10_siC_WDR5_peak_7101	chr19	4065452	4066303	+	1498	NA	promoter-TSS (NM_001317990)	promoter-TSS (NM_001317990)	-350	NM_001317990	51341	Hs.591384	NM_015898	ENSG00000178951	ZBTB7A	FBI-1|FBI1|LRF|TIP21|ZBTB7|ZNF857A|pokemon	zinc finger and BTB domain containing 7A	protein-coding
10_siC_WDR5_peak_5637	chr16	67260679	67261325	+	1495	NA	promoter-TSS (NM_014187)	promoter-TSS (NM_014187)	-31	NM_014187	29100	Hs.433203	NM_014187	ENSG00000168701	TMEM208	HSPC171	transmembrane protein 208	protein-coding
10_siC_WDR5_peak_12908	chr6	151560853	151562751	+	1495	NA	exon (NM_005100, exon 2 of 5)	exon (NM_005100, exon 2 of 5)	700	NM_005100	9590	Hs.371240	NM_005100	ENSG00000131016	AKAP12	AKAP250|SSeCKS	A-kinase anchoring protein 12	protein-coding
10_siC_WDR5_peak_125	chr1	23856862	23858166	+	1493	NA	5' UTR (NM_004091, exon 1 of 7)	5' UTR (NM_004091, exon 1 of 7)	211	NM_004091	1870	Hs.194333	NM_004091	ENSG00000007968	E2F2	E2F-2	E2F transcription factor 2	protein-coding
10_siC_WDR5_peak_3647	chr12	113622631	113624102	+	1490	NA	promoter-TSS (NM_001111322)	promoter-TSS (NM_001111322)	35	NM_001286215	84934	Hs.524762	NM_032848	ENSG00000139405	RITA1	C12orf52|RITA	RBPJ interacting and tubulin associated 1	protein-coding
10_siC_WDR5_peak_7599	chr19	46087380	46088074	+	1490	NA	intron (NM_025136, intron 1 of 1)	intron (NM_025136, intron 1 of 1)	333	NM_025136	80207	Hs.466945	NM_025136	ENSG00000125741	OPA3	MGA3	outer mitochondrial membrane lipid metabolism regulator OPA3	protein-coding
10_siC_WDR5_peak_6047	chr17	30771245	30771870	+	1487	NA	promoter-TSS (NM_001270482)	promoter-TSS (NM_001270482)	29	NM_001270482	5717	Hs.443379	NM_002815	ENSG00000108671	PSMD11	Rpn6|S9|p44.5	proteasome 26S subunit, non-ATPase 11	protein-coding
10_siC_WDR5_peak_10742	chr4	467504	468207	+	1486	NA	non-coding (NR_002451, exon 1 of 3)	non-coding (NR_002451, exon 1 of 3)	143	NR_002451	79963	Hs.677493	NM_024903	ENSG00000251595	ABCA11P	ABCA11|EST1133530	ATP binding cassette subfamily A member 11, pseudogene	pseudo
10_siC_WDR5_peak_13541	chr7	97735969	97736783	+	1485	NA	5' UTR (NM_014916, exon 1 of 14)	5' UTR (NM_014916, exon 1 of 14)	202	NM_014916	22853	Hs.444179	NM_014916	ENSG00000164715	LMTK2	AATYK2|BREK|KPI-2|KPI2|LMR2|PPP1R100|cprk|hBREK	lemur tyrosine kinase 2	protein-coding
10_siC_WDR5_peak_7378	chr19	23432773	23433495	+	1485	NA	promoter-TSS (NM_001355404)	promoter-TSS (NM_001355404)	62	NM_001355405	440519	Hs.675814	NM_001355404	ENSG00000196081	ZNF724	ZNF724P	zinc finger protein 724	protein-coding
10_siC_WDR5_peak_3631	chr12	112036900	112038059	+	1484	NA	promoter-TSS (NM_001310123)	promoter-TSS (NM_001310123)	1	NR_132311	6311	Hs.76253	NM_002973	ENSG00000204842	ATXN2	ATX2|SCA2|TNRC13	ataxin 2	protein-coding
10_siC_WDR5_peak_9107	chr20	3869331	3870701	+	1480	NA	promoter-TSS (NM_001324193)	promoter-TSS (NM_001324193)	-18	NR_136715	80025	Hs.114180	NM_024960	ENSG00000125779	PANK2	C20orf48|HARP|HSS|NBIA1|PKAN	pantothenate kinase 2	protein-coding
10_siC_WDR5_peak_5255	chr16	1727891	1728607	+	1478	NA	promoter-TSS (NM_144570)	promoter-TSS (NM_144570)	-31	NM_144570	90861	Hs.513261	NM_144570	ENSG00000206053	JPT2	C16orf34|HN1L|L11	Jupiter microtubule associated homolog 2	protein-coding
10_siC_WDR5_peak_1534	chr1	247170912	247171631	+	1477	NA	promoter-TSS (NM_020394)	promoter-TSS (NM_020394)	88	NM_001204221	57116	Hs.669893	NM_020394	ENSG00000197472	ZNF695	SBZF3	zinc finger protein 695	protein-coding
10_siC_WDR5_peak_3258	chr12	54121068	54121680	+	1475	NA	promoter-TSS (NM_020898)	promoter-TSS (NM_020898)	-138	NM_001143682	57658	Hs.156667	NM_020898	ENSG00000012822	CALCOCO1	Cocoa|PP13275|calphoglin	calcium binding and coiled-coil domain 1	protein-coding
10_siC_WDR5_peak_4915	chr15	68569678	68571311	+	1474	NA	5' UTR (NM_015322, exon 1 of 2)	5' UTR (NM_015322, exon 1 of 2)	411	NM_015322	10116	Hs.362733	NM_015322	ENSG00000169018	FEM1B	F1A-ALPHA|F1AA|FEM1-beta	fem-1 homolog B	protein-coding
10_siC_WDR5_peak_10165	chr3	50329609	50330147	+	1473	NA	TTS (NM_001200031)	TTS (NM_001200031)	148	NM_006764	7866	Hs.315177	NM_006764	ENSG00000214706	IFRD2	IFNRP|SKMc15|SM15	interferon related developmental regulator 2	protein-coding
10_siC_WDR5_peak_9974	chr3	14988567	14990229	+	1473	NA	promoter-TSS (NR_046252)	promoter-TSS (NR_046252)	2	NR_046255	100505641	Hs.517821	NR_046251	ENSG00000225733	FGD5-AS1	-	FGD5 antisense RNA 1	ncRNA
10_siC_WDR5_peak_3130	chr12	34175159	34175805	+	1468	NA	promoter-TSS (NM_032834)	promoter-TSS (NM_032834)	51	NM_032834	84920	Hs.102971	NM_032834	ENSG00000139133	ALG10	ALG10A|DIE2|KCR1	ALG10 alpha-1,2-glucosyltransferase	protein-coding
10_siC_WDR5_peak_7872	chr2	5175147	5175645	+	1464	NA	Intergenic	Intergenic	-471584	NR_034134	727982	Hs.444391	NR_034134	ENSG00000231532	LINC01249	-	long intergenic non-protein coding RNA 1249	ncRNA
10_siC_WDR5_peak_1512	chr1	244211341	244212219	+	1464	NA	promoter-TSS (NM_001278196)	promoter-TSS (NM_001278196)	-461	NM_001278196	10472	Hs.69997	NM_006352	ENSG00000179456	ZBTB18	C2H2-171|MRD22|RP58|TAZ-1|ZNF238	zinc finger and BTB domain containing 18	protein-coding
10_siC_WDR5_peak_6716	chr17	79650356	79651446	+	1463	NA	promoter-TSS (NM_004712)	promoter-TSS (NM_004712)	53	NM_001040025	339231	Hs.658789	NM_001040025	ENSG00000214087	ARL16	-	ADP ribosylation factor like GTPase 16	protein-coding
10_siC_WDR5_peak_2751	chr11	105892775	105893511	+	1461	NA	promoter-TSS (NM_001318747)	promoter-TSS (NM_001318747)	-129	NM_001318749	84437	Hs.266782	NM_032424	ENSG00000170903	MSANTD4	KIAA1826	Myb/SANT DNA binding domain containing 4 with coiled-coils	protein-coding
10_siC_WDR5_peak_9020	chr2	237087173	237088573	+	1461	NA	Intergenic	CpG	-10844	NM_001301687	2637	Hs.184945	NM_001485	ENSG00000168505	GBX2	-	gastrulation brain homeobox 2	protein-coding
10_siC_WDR5_peak_7315	chr19	17447623	17448571	+	1459	NA	promoter-TSS (NM_032620)	promoter-TSS (NM_032620)	-265	NM_001128855	84705	Hs.334885	NM_032620	ENSG00000130299	GTPBP3	COXPD23|GTPBG3|MSS1|MTGP1|THDF1	GTP binding protein 3, mitochondrial	protein-coding
10_siC_WDR5_peak_10700	chr3	194489802	194490310	+	1457	NA	promoter-TSS (NR_146990)	promoter-TSS (NR_146990)	-618	NR_146990	105374293		NR_146990	ENSG00000230401	LINC01972	-	long intergenic non-protein coding RNA 1972	ncRNA
10_siC_WDR5_peak_7969	chr2	24270012	24270772	+	1453	NA	promoter-TSS (NM_025203)	promoter-TSS (NM_025203)	-96	NM_001142319	80304	Hs.24624	NM_025203	ENSG00000163026	WDCP	C2orf44|MMAP|PP384	WD repeat and coiled coil containing	protein-coding
10_siC_WDR5_peak_1865	chr10	79789058	79789620	+	1443	NA	promoter-TSS (NM_007055)	promoter-TSS (NM_007055)	-66	NM_007055	11128	Hs.436896	NM_007055	ENSG00000148606	POLR3A	ADDH|HLD7|RPC1|RPC155|WDRTS|hRPC155	RNA polymerase III subunit A	protein-coding
10_siC_WDR5_peak_4604	chr14	105218988	105219751	+	1442	NA	promoter-TSS (NM_006427)	promoter-TSS (NM_006427)	-115	NM_006427	10572	Hs.112058	NM_006427	ENSG00000184990	SIVA1	CD27BP|SIVA|Siva-1|Siva-2	SIVA1 apoptosis inducing factor	protein-coding
10_siC_WDR5_peak_11858	chr5	149737083	149737824	+	1441	NA	intron (NM_001008657, intron 1 of 17)	CpG	193	NM_001135244	6949	Hs.519672	NM_000356	ENSG00000070814	TCOF1	MFD1|TCS|TCS1|treacle	treacle ribosome biogenesis factor 1	protein-coding
10_siC_WDR5_peak_2021	chr10	104004747	104005685	+	1441	NA	promoter-TSS (NM_001199379)	promoter-TSS (NM_001199379)	-73	NM_004193	8729	Hs.290243	NM_004193	ENSG00000107862	GBF1	ARF1GEF	golgi brefeldin A resistant guanine nucleotide exchange factor 1	protein-coding
10_siC_WDR5_peak_9982	chr3	15642617	15643692	+	1439	NA	promoter-TSS (NM_001281725)	promoter-TSS (NM_001281725)	-78	NM_001284416	26061	Hs.63290	NM_012260	ENSG00000131373	HACL1	2-HPCL|HPCL|HPCL2|PHYH2	2-hydroxyacyl-CoA lyase 1	protein-coding
10_siC_WDR5_peak_13019	chr7	1199455	1200458	+	1437	NA	promoter-TSS (NM_001365381)	promoter-TSS (NM_001365381)	-54	NR_110065	101927021	Hs.529566	NR_110065		LOC101927021	-	uncharacterized LOC101927021	ncRNA
10_siC_WDR5_peak_15342	chrX	103401229	103401880	+	1436	NA	intron (NM_001012755, intron 1 of 1)	CpG	136	NM_001012755	401612	Hs.660022	NM_001012755	ENSG00000269743	SLC25A53	MCART6	solute carrier family 25 member 53	protein-coding
10_siC_WDR5_peak_2506	chr11	62598740	62599700	+	1436	NA	promoter-TSS (NR_135084)	promoter-TSS (NR_135084)	303	NM_003164	6811	Hs.654602	NM_003164	ENSG00000162236	STX5	SED5|STX5A	syntaxin 5	protein-coding
10_siC_WDR5_peak_255	chr1	43311902	43312484	+	1430	NA	promoter-TSS (NM_015911)	promoter-TSS (NM_015911)	-51	NM_015911	51058	Hs.20879	NM_015911	ENSG00000164011	ZNF691	Zfp691	zinc finger protein 691	protein-coding
10_siC_WDR5_peak_9803	chr22	40440080	40441062	+	1429	NA	promoter-TSS (NR_163486)	promoter-TSS (NR_163486)	-37	NR_163486	114841040	Hs.474880	NR_163486		LOC114841040	-	uncharacterized LOC114841040	ncRNA
10_siC_WDR5_peak_3543	chr12	104323052	104324416	+	1428	NA	promoter-TSS (NR_037425)	promoter-TSS (NR_037425)	255	NR_027249	253724	Hs.506549	NR_027249	ENSG00000214198	TTC41P	GNN|GNNP	tetratricopeptide repeat domain 41, pseudogene	pseudo
10_siC_WDR5_peak_12045	chr5	179125360	179126197	+	1425	NA	promoter-TSS (NM_001363999)	promoter-TSS (NM_001363999)	-10	NM_001363996	821	Hs.567968	NM_001746	ENSG00000127022	CANX	CNX|IP90|P90	calnexin	protein-coding
10_siC_WDR5_peak_14887	chr9	109623189	109624733	+	1425	NA	Intergenic	Intergenic	-1486	NM_021224	58499	Hs.370379	NM_021224	ENSG00000148143	ZNF462	ZFPIP|Zfp462	zinc finger protein 462	protein-coding
10_siC_WDR5_peak_5883	chr17	8094972	8095767	+	1424	NA	Intergenic	L2|LINE|L2	-1871	NM_017622	54785	Hs.129563	NM_017622	ENSG00000196544	BORCS6	C17orf59|PRO2472	BLOC-1 related complex subunit 6	protein-coding
10_siC_WDR5_peak_983	chr1	163291393	163292019	+	1424	NA	promoter-TSS (NM_001254748)	promoter-TSS (NM_001254748)	-38	NM_145697	83540	Hs.651950	NM_031423	ENSG00000143228	NUF2	CDCA1|CT106|NUF2R	NUF2 component of NDC80 kinetochore complex	protein-coding
10_siC_WDR5_peak_6564	chr17	71582380	71582965	+	1424	NA	intron (NM_001144952, intron 1 of 44)	intron (NM_001144952, intron 1 of 44)	57912	NM_001144952	54549	Hs.435719	NM_019064	ENSG00000069188	SDK2	-	sidekick cell adhesion molecule 2	protein-coding
10_siC_WDR5_peak_841	chr1	153894636	153896126	+	1418	NA	promoter-TSS (NM_020699)	promoter-TSS (NM_020699)	67	NM_020699	57459	Hs.4779	NM_020699	ENSG00000143614	GATAD2B	MRD18|P66beta|p68	GATA zinc finger domain containing 2B	protein-coding
10_siC_WDR5_peak_1728	chr10	46222187	46222962	+	1416	NA	promoter-TSS (NM_015262)	promoter-TSS (NM_015262)	83	NM_001367393	253725	Hs.365286	NM_015262	ENSG00000172661	WASHC2C	FAM21A|FAM21C|VPEF	WASH complex subunit 2C	protein-coding
10_siC_WDR5_peak_1117	chr1	184723414	184724501	+	1411	NA	promoter-TSS (NM_001319960)	promoter-TSS (NM_001319960)	35	NR_135118	80267	Hs.523811	NM_025191	ENSG00000116406	EDEM3	C1orf22	ER degradation enhancing alpha-mannosidase like protein 3	protein-coding
10_siC_WDR5_peak_8482	chr2	105953578	105954155	+	1410	NA	promoter-TSS (NM_024093)	promoter-TSS (NM_024093)	-131	NM_001286537	79074	Hs.549577	NM_024093	ENSG00000135974	C2orf49	asw	chromosome 2 open reading frame 49	protein-coding
10_siC_WDR5_peak_10043	chr3	33481628	33482709	+	1409	NA	promoter-TSS (NM_014517)	promoter-TSS (NM_014517)	-271	NM_014517	7342	Hs.729120	NM_014517	ENSG00000153560	UBP1	LBP-1B|LBP-1a|LBP1A|LBP1B	upstream binding protein 1	protein-coding
10_siC_WDR5_peak_7699	chr19	51610822	51611892	+	1407	NA	intron (NM_145232, intron 1 of 2)	intron (NM_145232, intron 1 of 2)	309	NM_145232	90353	Hs.148425	NM_145232	ENSG00000142544	CTU1	ATPBD3|NCS6	cytosolic thiouridylase subunit 1	protein-coding
10_siC_WDR5_peak_5103	chr15	85174191	85174881	+	1405	NA	promoter-TSS (NR_003654)	promoter-TSS (NR_003654)	-155	NR_003654	54581	Hs.658114	NM_022050		SCAND2P	SCAND2	SCAN domain containing 2 pseudogene	pseudo
10_siC_WDR5_peak_14146	chr8	57123656	57124555	+	1405	NA	promoter-TSS (NM_001011671)	promoter-TSS (NM_001011671)	-92	NM_001317858	79145	Hs.436913	NM_024300	ENSG00000170791	CHCHD7	COX23	coiled-coil-helix-coiled-coil-helix domain containing 7	protein-coding
10_siC_WDR5_peak_8425	chr2	88990619	88991573	+	1404	NA	promoter-TSS (NM_144563)	promoter-TSS (NM_144563)	-95	NM_144563	22934	Hs.469264	NM_144563	ENSG00000153574	RPIA	RPI|RPIAD	ribose 5-phosphate isomerase A	protein-coding
10_siC_WDR5_peak_4396	chr14	70825961	70826763	+	1404	NA	promoter-TSS (NM_016468)	promoter-TSS (NM_016468)	38	NM_001204090	51241	Hs.709581	NM_016468	ENSG00000133983	COX16	C14orf112|HSPC203|hCOX16	cytochrome c oxidase assembly factor COX16	protein-coding
10_siC_WDR5_peak_2631	chr11	71823250	71824069	+	1402	NA	promoter-TSS (NM_001278494)	promoter-TSS (NM_001278494)	82	NM_001278489	25906	Hs.38044	NM_014042	ENSG00000110200	ANAPC15	APC15|C11orf51|HSPC020	anaphase promoting complex subunit 15	protein-coding
10_siC_WDR5_peak_7264	chr19	13885064	13885491	+	1402	NA	promoter-TSS (NM_014047)	promoter-TSS (NM_014047)	7	NM_014047	28974	Hs.231616	NM_014047	ENSG00000104979	C19orf53	HSPC023|LYDG10	chromosome 19 open reading frame 53	protein-coding
10_siC_WDR5_peak_5643	chr16	67840296	67840988	+	1401	NA	promoter-TSS (NM_001320240)	promoter-TSS (NM_001320240)	-150	NM_001288991	55815	Hs.632212	NM_018430	ENSG00000102904	TSNAXIP1	TXI1	translin associated factor X interacting protein 1	protein-coding
10_siC_WDR5_peak_5106	chr15	85258945	85259812	+	1399	NA	promoter-TSS (NM_014300)	promoter-TSS (NM_014300)	-8	NM_014300	23478	Hs.9534	NM_014300	ENSG00000140612	SEC11A	1810012E07Rik|SEC11L1|SPC18|SPCS4A|sid2895	SEC11 homolog A, signal peptidase complex subunit	protein-coding
10_siC_WDR5_peak_412	chr1	60524943	60525721	+	1397	NA	intron (NM_152377, intron 2 of 11)	intron (NM_152377, intron 2 of 11)	14110	NM_152377	127795	Hs.47385	NM_152377	ENSG00000162598	C1orf87	CREF	chromosome 1 open reading frame 87	protein-coding
10_siC_WDR5_peak_7737	chr19	54640650	54641866	+	1393	NA	promoter-TSS (NM_014516)	promoter-TSS (NM_014516)	-220	NM_014516	4849	Hs.343571	NM_014516	ENSG00000088038	CNOT3	LENG2|NOT3|NOT3H	CCR4-NOT transcription complex subunit 3	protein-coding
10_siC_WDR5_peak_7230	chr19	12551568	12552265	+	1392	NA	promoter-TSS (NM_005815)	promoter-TSS (NM_005815)	-81	NM_005815	10224	Hs.636894	NM_005815	ENSG00000180855	ZNF443	ZK1	zinc finger protein 443	protein-coding
10_siC_WDR5_peak_2036	chr10	104503292	104503924	+	1388	NA	promoter-TSS (NM_001083913)	promoter-TSS (NM_001083913)	-97	NM_001083913	54838	Hs.500897	NM_017787	ENSG00000166272	WBP1L	C10orf26|OPA1L|OPAL1	WW domain binding protein 1 like	protein-coding
10_siC_WDR5_peak_3804	chr12	132195212	132195887	+	1387	NA	promoter-TSS (NM_004592)	promoter-TSS (NM_004592)	-86	NM_004592	6433	Hs.308171	NM_004592	ENSG00000061936	SFSWAP	SFRS8|SWAP	splicing factor SWAP	protein-coding
10_siC_WDR5_peak_2076	chr10	114206273	114207349	+	1383	NA	promoter-TSS (NR_134523)	promoter-TSS (NR_134523)	65	NR_134523	143187	Hs.194554	NM_145206	ENSG00000151532	VTI1A	MMDS3|MVti1|VTI1RP2|Vti1-rp2	vesicle transport through interaction with t-SNAREs 1A	protein-coding
10_siC_WDR5_peak_2124	chr10	122610540	122611177	+	1382	NA	promoter-TSS (NM_018117)	promoter-TSS (NM_018117)	-16	NM_018117	55717	Hs.144447	NM_018117	ENSG00000120008	WDR11	BRWD2|DR11|HH14|SRI1|WDR15	WD repeat domain 11	protein-coding
10_siC_WDR5_peak_13007	chr6	170862692	170863870	+	1381	NA	promoter-TSS (NM_001172085)	promoter-TSS (NM_001172085)	-140	NM_001172085	6908	Hs.590872	NM_003194	ENSG00000112592	TBP	GTF2D|GTF2D1|HDL4|SCA17|TFIID	TATA-box binding protein	protein-coding
10_siC_WDR5_peak_3094	chr12	28343028	28344396	+	1381	NA	promoter-TSS (NR_148936)	promoter-TSS (NR_148936)	-41	NR_148936	729291	Hs.129278	NR_148936		LOC729291	-	uncharacterized LOC729291	ncRNA
10_siC_WDR5_peak_4464	chr14	78082761	78083603	+	1381	NA	promoter-TSS (NM_004863)	promoter-TSS (NM_004863)	-72	NM_004863	9517	Hs.435661	NM_004863	ENSG00000100596	SPTLC2	HSN1C|LCB2|LCB2A|NSAN1C|SPT2|hLCB2a	serine palmitoyltransferase long chain base subunit 2	protein-coding
10_siC_WDR5_peak_11772	chr5	137089060	137090959	+	1380	NA	promoter-TSS (NM_006805)	promoter-TSS (NM_006805)	43	NM_006805	10949	Hs.96996	NM_006805	ENSG00000177733	HNRNPA0	HNRPA0	heterogeneous nuclear ribonucleoprotein A0	protein-coding
10_siC_WDR5_peak_1171	chr1	201798095	201798946	+	1380	NA	non-coding (NR_046696, exon 1 of 3)	non-coding (NR_046696, exon 1 of 3)	167	NR_046696	100873949	Hs.604842	NR_046696	ENSG00000231871	IPO9-AS1	-	IPO9 antisense RNA 1	ncRNA
10_siC_WDR5_peak_1231	chr1	206785395	206785984	+	1380	NA	exon (NM_001201478, exon 1 of 13)	exon (NM_001201478, exon 1 of 13)	129	NM_006893	1939	Hs.497581	NM_006893	ENSG00000143486	EIF2D	HCA56|LGTN	eukaryotic translation initiation factor 2D	protein-coding
10_siC_WDR5_peak_13049	chr7	4814749	4815507	+	1378	NA	promoter-TSS (NM_001364858)	promoter-TSS (NM_001364858)	-126	NR_157345	9907	Hs.558440	NM_014855	ENSG00000242802	AP5Z1	KIAA0415|SPG48|zeta	adaptor related protein complex 5 subunit zeta 1	protein-coding
10_siC_WDR5_peak_7156	chr19	7694205	7694919	+	1378	NA	promoter-TSS (NM_001171155)	promoter-TSS (NM_001171155)	-117	NM_001171155	100131801	Hs.728837	NM_001171155	ENSG00000229833	PET100	C19orf79	PET100 cytochrome c oxidase chaperone	protein-coding
10_siC_WDR5_peak_7436	chr19	36239106	36239714	+	1378	NA	promoter-TSS (NM_019104)	promoter-TSS (NM_019104)	-67	NM_019104	55957	Hs.529100	NM_019104	ENSG00000267796	LIN37	F25965|ZK418.4|lin-37	lin-37 DREAM MuvB core complex component	protein-coding
10_siC_WDR5_peak_4964	chr15	72667934	72668777	+	1378	NA	promoter-TSS (NR_027262)	promoter-TSS (NR_027262)	0	NR_134869	3073	Hs.604479	NM_000520	ENSG00000213614	HEXA	TSD	hexosaminidase subunit alpha	protein-coding
10_siC_WDR5_peak_2434	chr11	47429702	47430162	+	1378	NA	promoter-TSS (NM_152264)	promoter-TSS (NM_152264)	-114	NM_152264	91252	Hs.523664	NM_152264	ENSG00000165915	SLC39A13	EDSSPD3|LZT-Hs9|SCDEDS|ZIP13	solute carrier family 39 member 13	protein-coding
10_siC_WDR5_peak_445	chr1	63249379	63250207	+	1378	NA	promoter-TSS (NM_032852)	promoter-TSS (NM_032852)	-10	NM_032852	84938	Hs.7353	NM_032852	ENSG00000125703	ATG4C	APG4-C|APG4C|AUTL1|AUTL3	autophagy related 4C cysteine peptidase	protein-coding
10_siC_WDR5_peak_12819	chr6	131383266	131384747	+	1377	NA	intron (NM_001350307, intron 1 of 18)	CpG	379	NM_001431	2037	Hs.486470	NM_001431	ENSG00000079819	EPB41L2	4.1-G|4.1G	erythrocyte membrane protein band 4.1 like 2	protein-coding
10_siC_WDR5_peak_733	chr1	117664051	117665023	+	1377	NA	promoter-TSS (NM_025188)	promoter-TSS (NM_025188)	-166	NM_025188	80263	Hs.301526	NM_025188	ENSG00000134253	TRIM45	RNF99	tripartite motif containing 45	protein-coding
10_siC_WDR5_peak_184	chr1	32110048	32110897	+	1376	NA	promoter-TSS (NM_001359651)	promoter-TSS (NM_001359651)	5	NR_033686	553115	Hs.470417	NM_012392	ENSG00000162517	PEF1	ABP32|PEF1A	penta-EF-hand domain containing 1	protein-coding
10_siC_WDR5_peak_1961	chr10	98591374	98591956	+	1375	NA	promoter-TSS (NM_001170766)	promoter-TSS (NM_001170766)	-390	NM_001346516	84458	Hs.427927	NM_015652	ENSG00000196233	LCOR	C10orf12|MLR2	ligand dependent nuclear receptor corepressor	protein-coding
10_siC_WDR5_peak_12020	chr5	176778370	176779136	+	1374	NA	promoter-TSS (NM_006816)	promoter-TSS (NM_006816)	-84	NM_006816	10960	Hs.75864	NM_006816	ENSG00000169223	LMAN2	C5orf8|GP36B|VIP36	lectin, mannose binding 2	protein-coding
10_siC_WDR5_peak_12504	chr6	52148933	52149986	+	1374	NA	promoter-TSS (NM_002388)	promoter-TSS (NM_002388)	81	NM_001366371	4172	Hs.179565	NM_002388	ENSG00000112118	MCM3	HCC5|P1-MCM3|P1.h|RLFB	minichromosome maintenance complex component 3	protein-coding
10_siC_WDR5_peak_3754	chr12	124196523	124197380	+	1371	NA	promoter-TSS (NM_012463)	promoter-TSS (NM_012463)	51	NM_012463	23545	Hs.25786	NM_012463	ENSG00000185344	ATP6V0A2	A2|ARCL|ARCL2A|ATP6A2|ATP6N1D|J6B7|RTF|STV1|TJ6|TJ6M|TJ6S|VPH1|WSS	ATPase H+ transporting V0 subunit a2	protein-coding
10_siC_WDR5_peak_310	chr1	52344051	52345225	+	1368	NA	promoter-TSS (NM_001242361)	promoter-TSS (NM_001242361)	-29	NM_002525	4898	Hs.584782	NM_002525	ENSG00000078618	NRDC	NRD1|hNRD1|hNRD2	nardilysin convertase	protein-coding
10_siC_WDR5_peak_13339	chr7	56173824	56174593	+	1368	NA	promoter-TSS (NM_016139)	promoter-TSS (NM_016139)	-39	NM_016139	51142	Hs.389996	NM_016139	ENSG00000106153	CHCHD2	C7orf17|MIX17B|MNRR1|NS2TP|PARK22	coiled-coil-helix-coiled-coil-helix domain containing 2	protein-coding
10_siC_WDR5_peak_12623	chr6	90927906	90928748	+	1367	NA	intron (NM_001170794, intron 1 of 6)	intron (NM_001170794, intron 1 of 6)	78235	NM_021813	60468	Hs.269764	NM_021813	ENSG00000112182	BACH2	BTBD25|IMD60	BTB domain and CNC homolog 2	protein-coding
10_siC_WDR5_peak_829	chr1	151431495	151432465	+	1362	NA	promoter-TSS (NM_001194937)	promoter-TSS (NM_001194937)	-10	NM_015100	23126	Hs.489873	NM_015100	ENSG00000143442	POGZ	MRD37|WHSUS|ZNF280E|ZNF635|ZNF635m	pogo transposable element derived with ZNF domain	protein-coding
10_siC_WDR5_peak_2613	chr11	68227587	68228817	+	1362	NA	promoter-TSS (NR_147970)	promoter-TSS (NR_147970)	-18	NR_147971	55291	Hs.503022	NM_018312	ENSG00000110075	PPP6R3	C11orf23|PP6R3|SAP190|SAPL|SAPLa|SAPS3	protein phosphatase 6 regulatory subunit 3	protein-coding
10_siC_WDR5_peak_6426	chr17	57696448	57697731	+	1362	NA	promoter-TSS (NM_001288653)	promoter-TSS (NM_001288653)	39	NM_001288653	1213	Hs.491351	NM_004859	ENSG00000141367	CLTC	CHC|CHC17|CLH-17|CLTCL2|Hc|MRD56	clathrin heavy chain	protein-coding
10_siC_WDR5_peak_5230	chr16	577194	577818	+	1361	NA	promoter-TSS (NR_024121)	promoter-TSS (NR_024121)	-99	NR_024121	64493	Hs.721553	NR_024121		LINC00235	C16orf10|LA16c-356B8.1|NCRNA00235	long intergenic non-protein coding RNA 235	ncRNA
10_siC_WDR5_peak_4897	chr15	66796782	66797951	+	1361	NA	promoter-TSS (NM_001287822)	promoter-TSS (NM_001287822)	-55	NM_001287822	55055	Hs.21331	NM_017975	ENSG00000174442	ZWILCH	KNTC1AP|hZwilch	zwilch kinetochore protein	protein-coding
10_siC_WDR5_peak_13021	chr7	1543636	1544305	+	1358	NA	promoter-TSS (NM_001080453)	promoter-TSS (NM_001080453)	55	NM_001080453	26173	Hs.532188	NM_001080453	ENSG00000164880	INTS1	INT1|NET28	integrator complex subunit 1	protein-coding
10_siC_WDR5_peak_676	chr1	110880442	110882567	+	1357	NA	promoter-TSS (NM_001201545)	promoter-TSS (NM_001201545)	289	NR_036595	440600	Hs.649375	NR_036595	ENSG00000227963	RBM15-AS1	AS-RBM15	RBM15 antisense RNA 1	ncRNA
10_siC_WDR5_peak_6590	chr17	72772087	72772849	+	1355	NA	promoter-TSS (NM_017728)	promoter-TSS (NM_017728)	16	NM_001305081	26151	Hs.144058	NM_015654	ENSG00000109065	NAT9	EBSP, hNATL	N-acetyltransferase 9 (putative)	protein-coding
10_siC_WDR5_peak_14893	chr9	110879997	110880681	+	1353	NA	Intergenic	Intergenic	-628289	NM_001314052	9314	Hs.376206	NM_004235	ENSG00000136826	KLF4	EZF|GKLF	Kruppel like factor 4	protein-coding
10_siC_WDR5_peak_6718	chr17	79678802	79679575	+	1352	NA	promoter-TSS (NM_001270888)	promoter-TSS (NM_001270888)	-78	NM_001270953	1468	Hs.548187	NM_012140	ENSG00000183048	SLC25A10	DIC	solute carrier family 25 member 10	protein-coding
10_siC_WDR5_peak_14421	chr8	131652750	131653171	+	1347	NA	Intergenic	Intergenic	-197040	NM_018482	50807	Hs.655552	NM_018482	ENSG00000153317	ASAP1	AMAP1|CENTB4|DDEF1|PAG2|PAP|ZG14P	ArfGAP with SH3 domain, ankyrin repeat and PH domain 1	protein-coding
10_siC_WDR5_peak_9337	chr20	45034881	45035554	+	1346	NA	promoter-TSS (NM_133171)	promoter-TSS (NM_133171)	37	NM_133171	63916	Hs.210469	NM_022086	ENSG00000062598	ELMO2	CED-12|CED12|Ced-12A|ELMO-2|VMPI	engulfment and cell motility 2	protein-coding
10_siC_WDR5_peak_4707	chr15	41522745	41523593	+	1345	NA	promoter-TSS (NM_007236)	promoter-TSS (NM_007236)	-214	NM_152596	161829	Hs.307999	NM_152596	ENSG00000178997	EXD1	EXDL1	exonuclease 3'-5' domain containing 1	protein-coding
10_siC_WDR5_peak_5264	chr16	2021799	2022284	+	1345	NA	promoter-TSS (NM_006453)	promoter-TSS (NM_006453)	-13	NM_006453	10607	Hs.513267	NM_006453	ENSG00000183751	TBL3	SAZD|UTP13	transducin beta like 3	protein-coding
10_siC_WDR5_peak_10368	chr3	114865744	114867163	+	1344	NA	promoter-TSS (NM_001348800)	promoter-TSS (NM_001348800)	-318	NM_001348801	26137	Hs.202577	NM_015642	ENSG00000181722	ZBTB20	DPZF|HOF|ODA-8S|PRIMS|ZNF288	zinc finger and BTB domain containing 20	protein-coding
10_siC_WDR5_peak_2564	chr11	65479320	65479982	+	1344	NA	promoter-TSS (NM_182709)	promoter-TSS (NM_182709)	-72	NM_001206833	10524	Hs.397010	NM_006388	ENSG00000172977	KAT5	ESA1|HTATIP|HTATIP1|PLIP|TIP|TIP60|ZC2HC5|cPLA2	lysine acetyltransferase 5	protein-coding
10_siC_WDR5_peak_11197	chr4	152681865	152682418	+	1343	NA	promoter-TSS (NM_004564)	promoter-TSS (NM_004564)	18	NM_004564	5188	Hs.119316	NM_004564	ENSG00000059691	GATB	HSPC199|PET112|PET112L	glutamyl-tRNA amidotransferase subunit B	protein-coding
10_siC_WDR5_peak_6291	chr17	47784948	47785869	+	1341	NA	promoter-TSS (NM_005827)	promoter-TSS (NM_005827)	-82	NM_001278784	10237	Hs.154073	NM_005827	ENSG00000121073	SLC35B1	UGTREL1	solute carrier family 35 member B1	protein-coding
10_siC_WDR5_peak_7613	chr19	46498273	46498906	+	1339	NA	promoter-TSS (NM_001267723)	promoter-TSS (NM_001267723)	-136	NM_001267723	729440	Hs.515479	NM_001080402	ENSG00000104983	CCDC61	-	coiled-coil domain containing 61	protein-coding
10_siC_WDR5_peak_9806	chr22	41032148	41033200	+	1339	NA	promoter-TSS (NM_020831)	promoter-TSS (NM_020831)	49	NM_020831	57591	Hs.654688	NM_020831	ENSG00000196588	MRTFA	BSAC|MAL|MKL|MKL1|MRTF-A	myocardin related transcription factor A	protein-coding
10_siC_WDR5_peak_6155	chr17	40984882	40985736	+	1338	NA	promoter-TSS (NM_001330229)	promoter-TSS (NM_001330229)	-105	NM_005789	10197	Hs.152978	NM_005789	ENSG00000131467	PSME3	HEL-S-283|Ki|PA28-gamma|PA28G|PA28gamma|REG-GAMMA	proteasome activator subunit 3	protein-coding
10_siC_WDR5_peak_1438	chr1	231113977	231115153	+	1335	NA	promoter-TSS (NM_001122835)	promoter-TSS (NM_001122835)	42	NM_024525	79573	Hs.424788	NM_024525	ENSG00000143643	TTC13	-	tetratricopeptide repeat domain 13	protein-coding
10_siC_WDR5_peak_6684	chr17	78388852	78389404	+	1335	NA	promoter-TSS (NR_148044)	promoter-TSS (NR_148044)	-115	NR_148044	284131	Hs.389678	NM_173627	ENSG00000173818	ENDOV	-	endonuclease V	protein-coding
10_siC_WDR5_peak_12556	chr6	73233776	73234156	+	1334	NA	Intergenic	Intergenic	-97605	NM_001160133	56479	Hs.445324	NM_019842	ENSG00000185760	KCNQ5	Kv7.5|MRD46	potassium voltage-gated channel subfamily Q member 5	protein-coding
10_siC_WDR5_peak_13001	chr6	170190175	170191077	+	1334	NA	non-coding (NR_026781, exon 2 of 2)	non-coding (NR_026781, exon 2 of 2)	457	NR_026780	80069	Hs.677182	NM_025002	ENSG00000231690	LINC00574	C6orf208|CRALA|dJ182D15.1	long intergenic non-protein coding RNA 574	ncRNA
10_siC_WDR5_peak_5055	chr15	78973931	78974477	+	1333	NA	Intergenic	Intergenic	-40652	NM_001256567	1143	Hs.624178	NM_000750	ENSG00000117971	CHRNB4	-	cholinergic receptor nicotinic beta 4 subunit	protein-coding
10_siC_WDR5_peak_2529	chr11	64037218	64037838	+	1329	NA	TTS (NM_000932)	TTS (NM_000932)	-14283	NM_001170726	56834	Hs.523763	NM_020155	ENSG00000173264	GPR137	C11orf4|GPR137A|TM7SF1L1	G protein-coupled receptor 137	protein-coding
10_siC_WDR5_peak_7799	chr19	58257924	58258362	+	1327	NA	promoter-TSS (NR_145328)	promoter-TSS (NR_145328)	-40	NR_145327	284309	Hs.720254	NM_173632	ENSG00000152443	ZNF776	-	zinc finger protein 776	protein-coding
10_siC_WDR5_peak_1392	chr1	227127142	227128348	+	1326	NA	promoter-TSS (NM_020247)	promoter-TSS (NM_020247)	-250	NM_020247	56997	Hs.118241	NM_020247	ENSG00000163050	COQ8A	ADCK3|ARCA2|CABC1|COQ10D4|COQ8|SCAR9	coenzyme Q8A	protein-coding
10_siC_WDR5_peak_6733	chr17	80023559	80024003	+	1322	NA	promoter-TSS (NM_022156)	promoter-TSS (NM_022156)	-101	NM_022156	64118	Hs.514599	NM_022156	ENSG00000169718	DUS1L	DUS1|PP3111	dihydrouridine synthase 1 like	protein-coding
10_siC_WDR5_peak_12810	chr6	127836489	127838115	+	1321	NA	exon (NM_001012279, exon 2 of 12)	exon (NM_001012279, exon 2 of 12)	2867	NM_001012279	387104	Hs.319247	NM_001012279	ENSG00000255330	SOGA3	C6orf174|dJ403A15.3	SOGA family member 3	protein-coding
10_siC_WDR5_peak_7788	chr19	57998847	57999392	+	1320	NA	promoter-TSS (NM_001291744)	promoter-TSS (NM_001291744)	1	NM_001291743	79744	Hs.744339	NM_024691	ENSG00000105136	ZNF419	ZAPHIR|ZNF419A	zinc finger protein 419	protein-coding
10_siC_WDR5_peak_14840	chr9	100395253	100396503	+	1318	NA	promoter-TSS (NM_139246)	promoter-TSS (NM_139246)	173	NM_001351506	4686	Hs.595669	NM_002486	ENSG00000136937	NCBP1	CBP80|NCBP|Sto1	nuclear cap binding protein subunit 1	protein-coding
10_siC_WDR5_peak_7207	chr19	11456704	11457343	+	1317	NA	promoter-TSS (NM_001321113)	promoter-TSS (NM_001321113)	-42	NM_033408	374882	Hs.8036	NM_033408	ENSG00000105518	TMEM205	UNQ501	transmembrane protein 205	protein-coding
10_siC_WDR5_peak_3334	chr12	58087614	58088246	+	1315	NA	promoter-TSS (NM_006812)	promoter-TSS (NM_006812)	15	NM_006812	10956	Hs.527861	NM_006812	ENSG00000135506	OS9	ERLEC2|OS-9	OS9 endoplasmic reticulum lectin	protein-coding
10_siC_WDR5_peak_6116	chr17	38573733	38574733	+	1314	NA	promoter-TSS (NM_001067)	promoter-TSS (NM_001067)	-85	NM_001067	7153	Hs.156346	NM_001067	ENSG00000131747	TOP2A	TOP2|TP2A	DNA topoisomerase II alpha	protein-coding
10_siC_WDR5_peak_5811	chr17	2952009	2952631	+	1310	NA	Intergenic	CpG	14581	NM_014566	8386	Hs.553508	NM_014566	ENSG00000262628	OR1D5	C17orf2|OR17-2|OR17-30|OR17-31|OR1D4	olfactory receptor family 1 subfamily D member 5	protein-coding
10_siC_WDR5_peak_13362	chr7	66093495	66094134	+	1309	NA	promoter-TSS (NM_153033)	promoter-TSS (NM_153033)	-54	NM_153033	154881	Hs.546627	NM_153033	ENSG00000243335	KCTD7	CLN14|EPM3	potassium channel tetramerization domain containing 7	protein-coding
10_siC_WDR5_peak_13965	chr8	18869929	18871336	+	1306	NA	intron (NM_015310, intron 1 of 15)	intron (NM_015310, intron 1 of 15)	581	NM_015310	23362	Hs.434255	NM_015310	ENSG00000156011	PSD3	EFA6D|EFA6R|HCA67	pleckstrin and Sec7 domain containing 3	protein-coding
10_siC_WDR5_peak_650	chr1	109234436	109235914	+	1304	NA	5' UTR (NM_001349768, exon 1 of 7)	5' UTR (NM_001349768, exon 1 of 7)	243	NM_001349770	55119	Hs.342307	NM_018061	ENSG00000134186	PRPF38B	NET1	pre-mRNA processing factor 38B	protein-coding
10_siC_WDR5_peak_3770	chr12	125140019	125141245	+	1303	NA	Intergenic	Intergenic	-88474	NM_001077261	9612	Hs.137510	NM_006312	ENSG00000196498	NCOR2	CTG26|N-CoR2|SMAP270|SMRT|SMRTE|SMRTE-tau|TNRC14|TRAC|TRAC-1|TRAC1	nuclear receptor corepressor 2	protein-coding
10_siC_WDR5_peak_7698	chr19	51307383	51308256	+	1303	NA	promoter-TSS (NM_032712)	promoter-TSS (NM_032712)	32	NM_032712	84798	Hs.256301	NM_032712	ENSG00000167747	C19orf48	-	chromosome 19 open reading frame 48	protein-coding
10_siC_WDR5_peak_14794	chr9	95527099	95527727	+	1302	NA	promoter-TSS (NM_015250)	promoter-TSS (NM_015250)	-298	NM_001003800	23299	Hs.436939	NM_015250	ENSG00000185963	BICD2	SMALED2|SMALED2A|SMALED2B|bA526D8.1	BICD cargo adaptor 2	protein-coding
10_siC_WDR5_peak_14506	chr8	146175802	146176441	+	1301	NA	intron (NM_001029976, intron 1 of 3)	CpG	145	NM_001029976	7564	Hs.493225	NM_006958	ENSG00000170631	ZNF16	HZF1|KOX9	zinc finger protein 16	protein-coding
10_siC_WDR5_peak_9111	chr20	5093444	5094157	+	1301	NA	promoter-TSS (NM_014145)	promoter-TSS (NM_014145)	-67	NM_001009925	29058	Hs.472024	NM_014145	ENSG00000089063	TMEM230	C20orf30|HSPC274|dJ1116H23.2.1	transmembrane protein 230	protein-coding
10_siC_WDR5_peak_932	chr1	156736595	156737740	+	1301	NA	promoter-TSS (NM_005973)	promoter-TSS (NM_005973)	-160	NM_005973	5546	Hs.516948	NM_005973	ENSG00000143294	PRCC	RCCP1|TPRC	proline rich mitotic checkpoint control factor	protein-coding
10_siC_WDR5_peak_11970	chr5	170628171	170628673	+	1300	NA	intron (NM_022897, intron 19 of 27)	intron (NM_022897, intron 19 of 27)	-107830	NM_021025	30012	Hs.249125	NM_021025	ENSG00000164438	TLX3	HOX11L2|RNX	T cell leukemia homeobox 3	protein-coding
10_siC_WDR5_peak_12870	chr6	143591933	143592550	+	1300	NA	intron (NM_001366354, intron 3 of 4)	intron (NM_001366354, intron 3 of 4)	106322	NM_001366361	51390	Hs.567501	NM_016108	ENSG00000146416	AIG1	AIG-1|dJ95L4.1	androgen induced 1	protein-coding
10_siC_WDR5_peak_11375	chr5	31531939	31532703	+	1298	NA	promoter-TSS (NM_018356)	promoter-TSS (NM_018356)	-52	NR_134298	55322	Hs.519246	NM_018356	ENSG00000082213	C5orf22	-	chromosome 5 open reading frame 22	protein-coding
10_siC_WDR5_peak_7306	chr19	16770650	16771228	+	1298	NA	promoter-TSS (NM_024104)	promoter-TSS (NM_024104)	16	NM_001300925	79086	Hs.356467	NM_024104	ENSG00000214046	SMIM7	C19orf42	small integral membrane protein 7	protein-coding
10_siC_WDR5_peak_14737	chr9	84210981	84211433	+	1297	NA	intron (NM_001303103, intron 14 of 19)	intron (NM_001303103, intron 14 of 19)	93243	NM_001303104	7088	Hs.197320	NM_005077	ENSG00000196781	TLE1	ESG|ESG1|GRG1	TLE family member 1, transcriptional corepressor	protein-coding
10_siC_WDR5_peak_6236	chr17	44302115	44303169	+	1297	NA	promoter-TSS (NM_001193465).2	promoter-TSS (NM_001193465).2	98	NM_001193465	284058	Hs.648744	NM_015443	ENSG00000120071	KANSL1	CENP-36|KDVS|KIAA1267|MSL1v1|NSL1|hMSL1v1	KAT8 regulatory NSL complex subunit 1	protein-coding
10_siC_WDR5_peak_4246	chr14	36295268	36296401	+	1296	NA	exon (NM_032352, exon 1 of 10)	exon (NM_032352, exon 1 of 10)	290	NM_032352	84312	Hs.525299	NM_032352	ENSG00000100916	BRMS1L	BRMS1	BRMS1 like transcriptional repressor	protein-coding
10_siC_WDR5_peak_10168	chr3	50388012	50388725	+	1296	NA	promoter-TSS (NM_001291284)	promoter-TSS (NM_001291284)	75	NM_001291284	11068	Hs.149443	NM_007022	ENSG00000114395	CYB561D2	101F6|TSP10|XXcos-LUCA11.4	cytochrome b561 family member D2	protein-coding
10_siC_WDR5_peak_9771	chr22	37171802	37172641	+	1295	NA	promoter-TSS (NR_033531)	promoter-TSS (NR_033531)	-58	NM_001177701	11020	Hs.415172	NM_006860	ENSG00000100360	IFT27	BBS19|RABL4|RAYL	intraflagellar transport 27	protein-coding
10_siC_WDR5_peak_3377	chr12	67662337	67663654	+	1294	NA	promoter-TSS (NM_018448)	promoter-TSS (NM_018448)	-143	NM_001329676	55832	Hs.546407	NM_018448	ENSG00000111530	CAND1	TIP120|TIP120A	cullin associated and neddylation dissociated 1	protein-coding
10_siC_WDR5_peak_5260	chr16	1876747	1877672	+	1290	NA	promoter-TSS (NM_005326)	promoter-TSS (NM_005326)	-14	NM_001363912	3029	Hs.157394	NM_005326	ENSG00000063854	HAGH	GLO2|GLX2|GLXII|HAGH1	hydroxyacylglutathione hydrolase	protein-coding
10_siC_WDR5_peak_5521	chr16	30933594	30934866	+	1289	NA	promoter-TSS (NM_001282351)	promoter-TSS (NM_001282351)	-146	NM_001282351	54620	Hs.152149	NM_019085	ENSG00000099364	FBXL19	CXXC11|Fbl19|JHDM1C	F-box and leucine rich repeat protein 19	protein-coding
10_siC_WDR5_peak_2832	chr11	118306772	118307303	+	1288	NA	promoter-TSS (NM_001197104)	promoter-TSS (NM_001197104)	-168	NM_001197104	4297	Hs.258855	NM_005933	ENSG00000118058	KMT2A	ALL-1|CXXC7|HRX|HTRX1|MLL|MLL1|MLL1A|TRX1|WDSTS	lysine methyltransferase 2A	protein-coding
10_siC_WDR5_peak_7530	chr19	41256141	41257657	+	1287	NA	promoter-TSS (NM_001353807)	promoter-TSS (NM_001353807)	-209	NM_004596	6626	Hs.466775	NM_004596	ENSG00000077312	SNRPA	Mud1|U1-A|U1A	small nuclear ribonucleoprotein polypeptide A	protein-coding
10_siC_WDR5_peak_6333	chr17	49230603	49231509	+	1284	NA	intron (NM_000269, intron 1 of 4)	CpG	136	NM_198175	4830	Hs.463456	NM_000269	ENSG00000239672	NME1	AWD|GAAD|NB|NBS|NDKA|NDPK-A|NDPKA|NM23|NM23-H1	NME/NM23 nucleoside diphosphate kinase 1	protein-coding
10_siC_WDR5_peak_7634	chr19	48248460	48249107	+	1284	NA	promoter-TSS (NM_015710)	promoter-TSS (NM_015710)	-20	NM_015710	29997	Hs.421907	NM_015710	ENSG00000105373	NOP53	GLTSCR2|PICT-1|PICT1	NOP53 ribosome biogenesis factor	protein-coding
10_siC_WDR5_peak_700	chr1	113932718	113933540	+	1284	NA	promoter-TSS (NM_152900)	promoter-TSS (NM_152900)	-8	NM_152900	260425	Hs.486189	NM_020965	ENSG00000081026	MAGI3	MAGI-3|dJ730K3.2	membrane associated guanylate kinase, WW and PDZ domain containing 3	protein-coding
10_siC_WDR5_peak_6607	chr17	73285244	73285896	+	1283	NA	promoter-TSS (NM_001126122)	promoter-TSS (NM_001126122)	-40	NM_021734	60386	Hs.514470	NM_021734	ENSG00000125454	SLC25A19	DNC|MCPHA|MUP1|THMD3|THMD4|TPC	solute carrier family 25 member 19	protein-coding
10_siC_WDR5_peak_695	chr1	113498936	113500190	+	1282	NA	promoter-TSS (NM_003051)	promoter-TSS (NM_003051)	526	NR_103744	100506392	Hs.418285	NR_103743	ENSG00000226419	SLC16A1-AS1	-	SLC16A1 antisense RNA 1	ncRNA
10_siC_WDR5_peak_4755	chr15	46570212	46570908	+	1282	NA	Intergenic	Intergenic	573167	NR_135680	105370802	Hs.447522	NR_135680	ENSG00000259200	LOC105370802	-	uncharacterized LOC105370802	ncRNA
10_siC_WDR5_peak_12876	chr6	144416331	144417257	+	1280	NA	promoter-TSS (NM_031287)	promoter-TSS (NM_031287)	-84	NM_031287	83443	Hs.110695	NM_031287	ENSG00000169976	SF3B5	SF3b10|Ysf3	splicing factor 3b subunit 5	protein-coding
10_siC_WDR5_peak_6217	chr17	43138104	43139072	+	1280	NA	promoter-TSS (NM_001288654)	promoter-TSS (NM_001288654)	-89	NM_001321326	79877	Hs.463148	NM_024819	ENSG00000172992	DCAKD	-	dephospho-CoA kinase domain containing	protein-coding
10_siC_WDR5_peak_6425	chr17	57642529	57643457	+	1279	NA	promoter-TSS (NM_001166301)	promoter-TSS (NM_001166301)	22	NM_001166301	79665	Hs.29403	NM_024612	ENSG00000108406	DHX40	ARG147|DDX40|PAD	DEAH-box helicase 40	protein-coding
10_siC_WDR5_peak_2717	chr11	86013033	86013546	+	1277	NA	promoter-TSS (NM_016401)	promoter-TSS (NM_016401)	7	NM_001322407	51501	Hs.283322	NM_016401	ENSG00000149196	HIKESHI	C11orf73|HLD13|HSPC138|HSPC179|L7RN6|OPI10	heat shock protein nuclear import factor hikeshi	protein-coding
10_siC_WDR5_peak_8299	chr2	70528499	70529226	+	1272	NA	exon (NM_001329753, exon 1 of 3)	exon (NM_001329753, exon 1 of 3)	337	NM_001329755	84908	Hs.516077	NM_032822	ENSG00000035141	FAM136A	-	family with sequence similarity 136 member A	protein-coding
10_siC_WDR5_peak_13726	chr7	132937550	132938044	+	1271	NA	promoter-TSS (NM_021807)	promoter-TSS (NM_021807)	-26	NM_001037126	60412	Hs.321273	NM_021807	ENSG00000131558	EXOC4	SEC8|SEC8L1|Sec8p	exocyst complex component 4	protein-coding
10_siC_WDR5_peak_12978	chr6	162959675	162960192	+	1270	NA	intron (NM_013987, intron 1 of 10)	intron (NM_013987, intron 1 of 10)	-188231	NM_152410	135138	Hs.25791	NM_152410	ENSG00000112530	PACRG	GLUP|HAK005771|PACRG2.1|PARK2CRG	parkin coregulated	protein-coding
10_siC_WDR5_peak_15139	chr9	140472952	140473573	+	1268	NA	promoter-TSS (NM_001346373)	promoter-TSS (NM_001346373)	115	NM_001346391	92715	Hs.292570	NM_138778	ENSG00000148399	DPH7	C9orf112|RRT2|WDR85	diphthamide biosynthesis 7	protein-coding
10_siC_WDR5_peak_11130	chr4	140003924	140005011	+	1266	NA	intron (NM_001371336, intron 4 of 8)	intron (NM_001371336, intron 4 of 8)	911	NM_006874	1998	Hs.634040	NM_006874	ENSG00000109381	ELF2	EU32|NERF|NERF-1A|NERF-1B|NERF-1a,b|NERF-2	E74 like ETS transcription factor 2	protein-coding
10_siC_WDR5_peak_9774	chr22	38004050	38005187	+	1265	NA	promoter-TSS (NM_001172688)	promoter-TSS (NM_001172688)	137	NM_001001560	26088	Hs.499158	NM_013365	ENSG00000100083	GGA1	-	golgi associated, gamma adaptin ear containing, ARF binding protein 1	protein-coding
10_siC_WDR5_peak_5233	chr16	638925	640141	+	1265	NA	promoter-TSS (NM_001172664)	promoter-TSS (NM_001172664)	-136	NM_001172664	57799	Hs.459630	NM_021168	ENSG00000197562	RAB40C	RARL|RASL8C	RAB40C, member RAS oncogene family	protein-coding
10_siC_WDR5_peak_11974	chr5	170814764	170815780	+	1264	NA	intron (NM_001355010, intron 1 of 6)	CpG	419	NM_001037738	4869	Hs.557550	NM_002520	ENSG00000181163	NPM1	B23|NPM	nucleophosmin 1	protein-coding
10_siC_WDR5_peak_3298	chr12	56617894	56618368	+	1264	NA	promoter-TSS (NM_024068)	promoter-TSS (NM_024068)	5	NM_024068	79035	Hs.240170	NM_024068	ENSG00000139579	NABP2	OBFC2B|SOSS-B1|SSB1|hSSB1	nucleic acid binding protein 2	protein-coding
10_siC_WDR5_peak_1731	chr10	46951337	46952014	+	1264	NA	TTS (NM_001370184)	TTS (NM_001370184)	203	NR_134489	102724593	Hs.663831	NR_134489		LOC102724593	-	uncharacterized LOC102724593	ncRNA
10_siC_WDR5_peak_11877	chr5	153825170	153825974	+	1263	NA	promoter-TSS (NR_037897)	promoter-TSS (NR_037897)	15	NR_024084	79685	Hs.592566	NM_024632	ENSG00000164576	SAP30L	NS4ATP2	SAP30 like	protein-coding
10_siC_WDR5_peak_11381	chr5	32313126	32313696	+	1263	NA	promoter-TSS (NM_001040446)	promoter-TSS (NM_001040446)	-366	NM_001294344	54545	Hs.481836	NM_019061	ENSG00000150712	MTMR12	3-PAP|PIP3AP	myotubularin related protein 12	protein-coding
10_siC_WDR5_peak_14774	chr9	91932945	91933699	+	1263	NA	promoter-TSS (NM_001354702)	promoter-TSS (NM_001354702)	-93	NM_024077	79048	Hs.59804	NM_024077	ENSG00000187742	SECISBP2	SBP2	SECIS binding protein 2	protein-coding
10_siC_WDR5_peak_8155	chr2	47925530	47926131	+	1261	NA	Intergenic	LTR8|LTR|ERV1	-84391	NM_001281493	2956	Hs.445052	NM_000179	ENSG00000116062	MSH6	GTBP|GTMBP|HNPCC5|HSAP|p160	mutS homolog 6	protein-coding
10_siC_WDR5_peak_14515	chr9	2234322	2234974	+	1253	NA	Intergenic	Intergenic	76192	NM_001289400	6595	Hs.298990	NM_003070	ENSG00000080503	SMARCA2	BAF190|BRM|NCBRS|SNF2|SNF2L2|SNF2LA|SWI2|Sth1p|hBRM|hSNF2a	SWI/SNF related, matrix associated, actin dependent regulator of chromatin, subfamily a, member 2	protein-coding
10_siC_WDR5_peak_6698	chr17	79196541	79197386	+	1252	NA	promoter-TSS (NM_001319228)	promoter-TSS (NM_001319228)	-198	NM_014984	22994	Hs.514578	NM_014984	ENSG00000141577	CEP131	AZ1|AZI1|ZA1	centrosomal protein 131	protein-coding
10_siC_WDR5_peak_217	chr1	36851291	36851871	+	1251	NA	promoter-TSS (NM_001282547)	promoter-TSS (NM_001282547)	-56	NM_001282546	83931	Hs.471768	NM_032017	ENSG00000196182	STK40	SHIK|SgK495	serine/threonine kinase 40	protein-coding
10_siC_WDR5_peak_4871	chr15	64679796	64680239	+	1251	NA	promoter-TSS (NR_135855)	promoter-TSS (NR_135855)	-18	NM_016213	9325	Hs.500340	NM_016213	ENSG00000103671	TRIP4	ASC-1|ASC1|HsT17391|MDCDC|SMABF1|ZC2HC5	thyroid hormone receptor interactor 4	protein-coding
10_siC_WDR5_peak_4358	chr14	64805080	64805980	+	1251	NA	promoter-TSS (NM_001291723)	promoter-TSS (NM_001291723)	-199	NR_073496	2100	Hs.660607	NM_001437	ENSG00000140009	ESR2	ER-BETA|ESR-BETA|ESRB|ESTRB|Erb|NR3A2|ODG8	estrogen receptor 2	protein-coding
10_siC_WDR5_peak_6612	chr17	73662960	73663695	+	1250	NA	promoter-TSS (NM_004259)	promoter-TSS (NM_004259)	-91	NM_013260	29115	Hs.655088	NM_013260	ENSG00000161526	SAP30BP	HCNGP|HTRG|HTRP	SAP30 binding protein	protein-coding
10_siC_WDR5_peak_7525	chr19	41082514	41083143	+	1249	NA	promoter-TSS (NM_138392)	promoter-TSS (NM_138392)	49	NM_138392	92799	Hs.26506	NM_138392	ENSG00000160410	SHKBP1	PP203|Sb1	SH3KBP1 binding protein 1	protein-coding
10_siC_WDR5_peak_4473	chr14	81999820	82000603	+	1247	NA	promoter-TSS (NM_001244984)	promoter-TSS (NM_001244984)	-6	NM_001244984	6400	Hs.181300	NM_005065	ENSG00000071537	SEL1L	Hrd3|PRO1063|SEL1-LIKE|SEL1L1	SEL1L adaptor subunit of ERAD E3 ubiquitin ligase	protein-coding
10_siC_WDR5_peak_8376	chr2	80592837	80593258	+	1247	NA	intron (NM_001282599, intron 1 of 11)	intron (NM_001282599, intron 1 of 11)	52543	NM_001282599	1496	Hs.167368	NM_004389	ENSG00000066032	CTNNA2	CAP-R|CAPR|CDCBM9|CT114|CTNR	catenin alpha 2	protein-coding
10_siC_WDR5_peak_10436	chr3	126701430	126701947	+	1247	NA	Intergenic	CpG	-5749	NM_032242	5361	Hs.432329	NM_032242	ENSG00000114554	PLXNA1	NOV|NOVP|PLEXIN-A1|PLXN1	plexin A1	protein-coding
10_siC_WDR5_peak_6634	chr17	74722191	74723319	+	1246	NA	promoter-TSS (NR_038193)	promoter-TSS (NR_038193)	-67	NM_001081461	23210	Hs.514505	NM_015167	ENSG00000070495	JMJD6	PSR|PTDSR|PTDSR1	jumonji domain containing 6, arginine demethylase and lysine hydroxylase	protein-coding
10_siC_WDR5_peak_10365	chr3	113414837	113415891	+	1246	NA	non-coding (NR_111981, exon 1 of 7)	non-coding (NR_111981, exon 1 of 7)	125	NM_001009899	205717	Hs.632570	NM_001009899	ENSG00000176542	USF3	KIAA2018	upstream transcription factor family member 3	protein-coding
10_siC_WDR5_peak_9758	chr22	34225594	34226159	+	1245	NA	intron (NM_001362953, intron 1 of 14)	intron (NM_001362953, intron 1 of 14)	90540	NM_133642	9215	Hs.474667	NM_004737	ENSG00000133424	LARGE1	LARGE|MDC1D|MDDGA6|MDDGB6	LARGE xylosyl- and glucuronyltransferase 1	protein-coding
10_siC_WDR5_peak_6721	chr17	79818220	79819261	+	1244	NA	promoter-TSS (NM_000918)	promoter-TSS (NM_000918)	-329	NM_000918	5034	Hs.464336	NM_000918	ENSG00000185624	P4HB	CLCRP1|DSI|ERBA2L|GIT|P4Hbeta|PDI|PDIA1|PHDB|PO4DB|PO4HB|PROHB	prolyl 4-hydroxylase subunit beta	protein-coding
10_siC_WDR5_peak_12600	chr6	88299417	88300069	+	1243	NA	promoter-TSS (NM_001350505)	promoter-TSS (NM_001350505)	7	NM_001350506	57038	Hs.485910	NM_020320	ENSG00000146282	RARS2	ArgRS|DALRD2|PCH6|PRO1992|RARSL	arginyl-tRNA synthetase 2, mitochondrial	protein-coding
10_siC_WDR5_peak_5249	chr16	1401589	1402177	+	1241	NA	promoter-TSS (NM_032520)	promoter-TSS (NM_032520)	-4	NM_001001410	115939	Hs.134846	NM_001001410	ENSG00000007520	TSR3	C16orf42	TSR3 ribosome maturation factor	protein-coding
10_siC_WDR5_peak_13847	chr7	150075960	150076740	+	1240	NA	promoter-TSS (NM_173680)	promoter-TSS (NM_173680)	-69	NM_173680	285971	Hs.655734	NM_173680	ENSG00000196456	ZNF775	-	zinc finger protein 775	protein-coding
10_siC_WDR5_peak_5596	chr16	56484889	56485817	+	1239	NA	promoter-TSS (NM_018233)	promoter-TSS (NM_018233)	-83	NM_001324359	55239	Hs.231883	NM_018233	ENSG00000087263	OGFOD1	TPA1	2-oxoglutarate and iron dependent oxygenase domain containing 1	protein-coding
10_siC_WDR5_peak_662	chr1	109791733	109792259	+	1239	NA	promoter-TSS (NM_001408)	promoter-TSS (NM_001408)	-165	NM_001408	1952	Hs.57652	NM_001408	ENSG00000143126	CELSR2	ADGRC2|CDHF10|EGFL2|Flamingo1|MEGF3	cadherin EGF LAG seven-pass G-type receptor 2	protein-coding
10_siC_WDR5_peak_7770	chr19	56825945	56826853	+	1239	NA	promoter-TSS (NM_001322066)	promoter-TSS (NM_001322066)	-191	NM_001322064	79149	Hs.177688	NM_024303	ENSG00000131848	ZSCAN5A	ZNF495|ZSCAN5	zinc finger and SCAN domain containing 5A	protein-coding
10_siC_WDR5_peak_3208	chr12	50101081	50101652	+	1236	NA	promoter-TSS (NM_001367835)	promoter-TSS (NM_001367835)	-178	NM_001367835	91010	Hs.179838	NM_175736	ENSG00000161791	FMNL3	FHOD3|FRL2|WBP-3|WBP3	formin like 3	protein-coding
10_siC_WDR5_peak_15026	chr9	131842856	131843648	+	1235	NA	promoter-TSS (NM_020438)	promoter-TSS (NM_020438)	-138	NM_001135917	57171	Hs.21701	NM_020438	ENSG00000167130	DOLPP1	LSFR2	dolichyldiphosphatase 1	protein-coding
10_siC_WDR5_peak_6995	chr18	71958989	71959871	+	1235	NA	promoter-TSS (NM_001914)	promoter-TSS (NM_001914)	-232	NM_148923	1528	Hs.465413	NM_001914	ENSG00000166347	CYB5A	CYB5|MCB5|METAG	cytochrome b5 type A	protein-coding
10_siC_WDR5_peak_1986	chr10	101379769	101381310	+	1235	NA	promoter-TSS (NM_031212)	promoter-TSS (NM_031212)	-343	NM_031212	81894	Hs.403790	NM_031212	ENSG00000155287	SLC25A28	MFRN2|MRS3/4|MRS4L|NPD016	solute carrier family 25 member 28	protein-coding
10_siC_WDR5_peak_4171	chr14	21905167	21905746	+	1235	NA	promoter-TSS (NM_020920)	promoter-TSS (NM_020920)	-22	NM_020920	57680	Hs.530698	NM_020920	ENSG00000100888	CHD8	AUTS18|HELSNF1	chromodomain helicase DNA binding protein 8	protein-coding
10_siC_WDR5_peak_6745	chr17	80477052	80477673	+	1232	NA	promoter-TSS (NM_004514)	promoter-TSS (NM_004514)	-246	NM_004514	3607	Hs.591140	NM_004514	ENSG00000141568	FOXK2	ILF|ILF-1|ILF1|nGTBP	forkhead box K2	protein-coding
10_siC_WDR5_peak_3214	chr12	50372620	50373494	+	1231	NA	Intergenic	Intergenic	6327	NM_001652	363	Hs.54505	NM_001652	ENSG00000086159	AQP6	AQP2L|KID	aquaporin 6	protein-coding
10_siC_WDR5_peak_14145	chr8	56986619	56987358	+	1229	NA	promoter-TSS (NM_001146227)	promoter-TSS (NM_001146227)	77	NM_001146227	6224	Hs.8102	NM_001023	ENSG00000008988	RPS20	S20|uS10	ribosomal protein S20	protein-coding
10_siC_WDR5_peak_7444	chr19	36504831	36505790	+	1228	NA	promoter-TSS (NM_001297701)	promoter-TSS (NM_001297701)	-94	NM_001290056	101927572	Hs.676116	NM_001290056		LOC101927572	-	uncharacterized LOC101927572	protein-coding
10_siC_WDR5_peak_3490	chr12	95610909	95612228	+	1227	NA	promoter-TSS (NM_017599)	promoter-TSS (NM_017599)	-15	NM_017599	55591	Hs.24135	NM_017599	ENSG00000028203	VEZT	VEZATIN	vezatin, adherens junctions transmembrane protein	protein-coding
10_siC_WDR5_peak_6238	chr17	44438610	44439559	+	1226	NA	promoter-TSS (NM_001103154)	promoter-TSS (NM_001103154)	69	NM_001352769	100506084	Hs.559259	NM_001039083	ENSG00000228696	ARL17B	ARL17|ARL17A	ADP ribosylation factor like GTPase 17B	protein-coding
10_siC_WDR5_peak_6152	chr17	40925232	40925876	+	1226	NA	promoter-TSS (NM_032353)	promoter-TSS (NM_032353)	87	NM_032353	84313	Hs.500165	NM_032353	ENSG00000131475	VPS25	DERP9|EAP20|FAP20	vacuolar protein sorting 25 homolog	protein-coding
10_siC_WDR5_peak_13175	chr7	27702165	27702847	+	1226	NA	promoter-TSS (NM_152740)	promoter-TSS (NM_152740)	-4	NM_152740	11112	Hs.406758	NM_152740	ENSG00000106049	HIBADH	NS5ATP1	3-hydroxyisobutyrate dehydrogenase	protein-coding
10_siC_WDR5_peak_8256	chr2	65556578	65557098	+	1225	NA	intron (NM_001128210, intron 4 of 5)	intron (NM_001128210, intron 4 of 5)	37074	NM_001128210	200734	Hs.59332	NM_181784	ENSG00000198369	SPRED2	Spred-2	sprouty related EVH1 domain containing 2	protein-coding
10_siC_WDR5_peak_3776	chr12	125398587	125399961	+	1224	NA	promoter-TSS (NR_049820)	promoter-TSS (NR_049820)	-78	NM_021009	7316	Hs.520348	NM_021009	ENSG00000150991	UBC	HMG20	ubiquitin C	protein-coding
10_siC_WDR5_peak_6219	chr17	43224903	43226183	+	1224	NA	5' UTR (NM_006460, exon 1 of 1)	5' UTR (NM_006460, exon 1 of 1)	859	NM_006460	10614	Hs.586945	NM_006460	ENSG00000186834	HEXIM1	CLP1|EDG1|HIS1|MAQ1	HEXIM P-TEFb complex subunit 1	protein-coding
10_siC_WDR5_peak_13855	chr7	150725231	150725925	+	1224	NA	promoter-TSS (NM_001282292)	promoter-TSS (NM_001282292)	41	NM_001282291	11194	Hs.647118	NM_007188	ENSG00000197150	ABCB8	EST328128|M-ABC1|MABC1	ATP binding cassette subfamily B member 8	protein-coding
10_siC_WDR5_peak_2427	chr11	46721914	46722818	+	1223	NA	promoter-TSS (NM_001184751)	promoter-TSS (NM_001184751)	-197	NM_004308	392	Hs.138860	NM_004308	ENSG00000175220	ARHGAP1	CDC42GAP|RHOGAP|RHOGAP1|p50rhoGAP	Rho GTPase activating protein 1	protein-coding
10_siC_WDR5_peak_7313	chr19	17420004	17420955	+	1223	NA	intron (NM_024050, intron 1 of 4)	intron (NM_024050, intron 1 of 4)	107	NM_024050	79016	Hs.466154	NM_024050	ENSG00000130311	DDA1	C19orf58|PCIA1	DET1 and DDB1 associated 1	protein-coding
10_siC_WDR5_peak_6170	chr17	41545028	41546275	+	1222	NA	Intergenic	Intergenic	-15582	NR_136227	1659	Hs.463105	NM_004941	ENSG00000067596	DHX8	DDX8|Dhr2|HRH1|PRP22|PRPF22	DEAH-box helicase 8	protein-coding
10_siC_WDR5_peak_113	chr1	20987656	20988408	+	1222	NA	promoter-TSS (NM_005216)	promoter-TSS (NM_005216)	5	NM_005216	1650	Hs.523145	NM_005216	ENSG00000244038	DDOST	AGER1|CDG1R|GATD6|OKSWcl45|OST|OST48|WBP1	dolichyl-diphosphooligosaccharide--protein glycosyltransferase non-catalytic subunit	protein-coding
10_siC_WDR5_peak_14858	chr9	102861039	102862197	+	1220	NA	promoter-TSS (NM_014425)	promoter-TSS (NM_014425)	93	NM_014425	27130	Hs.558477	NM_014425	ENSG00000119509	INVS	INV|NPH2|NPHP2	inversin	protein-coding
10_siC_WDR5_peak_14968	chr9	127177354	127178030	+	1220	NA	promoter-TSS (NM_002799)	promoter-TSS (NM_002799)	29	NM_002799	5695	Hs.213470	NM_002799	ENSG00000136930	PSMB7	Z	proteasome subunit beta 7	protein-coding
10_siC_WDR5_peak_670	chr1	110230155	110230895	+	1219	NA	promoter-TSS (NM_146421)	promoter-TSS (NM_146421)	86	NM_000561	2944	Hs.301961	NM_000561	ENSG00000134184	GSTM1	GST1|GSTM1-1|GSTM1a-1a|GSTM1b-1b|GTH4|GTM1|H-B|MU|MU-1	glutathione S-transferase mu 1	protein-coding
10_siC_WDR5_peak_4980	chr15	74392163	74392902	+	1217	NA	promoter-TSS (NR_160652)	promoter-TSS (NR_160652)	15	NR_160652	732265		NR_160652		LOC732265	-	COMM domain containing 4 pseudogene	pseudo
10_siC_WDR5_peak_12345	chr6	33167785	33168905	+	1216	NA	promoter-TSS (NM_001077516).2	promoter-TSS (NM_001077516).2	97	NM_021976	6257	Hs.388034	NM_021976	ENSG00000204231	RXRB	DAUDI6|H-2RIIBP|NR2B2|RCoR-1	retinoid X receptor beta	protein-coding
10_siC_WDR5_peak_13915	chr8	6565248	6566803	+	1213	NA	promoter-TSS (NM_018361)	promoter-TSS (NM_018361)	-138	NM_018361	55326	Hs.624002	NM_018361	ENSG00000155189	AGPAT5	1AGPAT5|LPAATE	1-acylglycerol-3-phosphate O-acyltransferase 5	protein-coding
10_siC_WDR5_peak_1453	chr1	234508911	234509750	+	1213	NA	promoter-TSS (NR_125962)	promoter-TSS (NR_125962)	9	NR_125961	101927765	Hs.596703	NR_125961	ENSG00000231663	COA6-AS1	-	COA6 antisense RNA 1	ncRNA
10_siC_WDR5_peak_12312	chr6	30875587	30876173	+	1212	NA	promoter-TSS (NM_001517)	promoter-TSS (NM_001517)	-104	NM_001517	2968	Hs.485070	NM_001517	ENSG00000213780	GTF2H4	P52|TFB2|TFIIH	general transcription factor IIH subunit 4	protein-coding
10_siC_WDR5_peak_9231	chr20	32319706	32320305	+	1211	NA	intron (NM_001282933, intron 1 of 14)	CpG	203	NM_001282933	84905	Hs.516989	NM_032819	ENSG00000131061	ZNF341	HIES3	zinc finger protein 341	protein-coding
10_siC_WDR5_peak_1277	chr1	212458071	212459119	+	1210	NA	promoter-TSS (NM_006243)	promoter-TSS (NM_006243)	-157	NM_006243	5525	Hs.744012	NM_006243	ENSG00000066027	PPP2R5A	B56A|B56alpha|PR61A	protein phosphatase 2 regulatory subunit B'alpha	protein-coding
10_siC_WDR5_peak_7633	chr19	48111329	48112572	+	1209	NA	intron (NM_015711, intron 1 of 14)	CpG	497	NM_015711	29998	Hs.97244	NM_015711	ENSG00000063169	BICRA	GLTSCR1	BRD4 interacting chromatin remodeling complex associated protein	protein-coding
10_siC_WDR5_peak_4935	chr15	70325927	70326413	+	1208	NA	Intergenic	CpG	45637	NR_030714	693214		NR_030714	ENSG00000207965	MIR629	MIRN629|hsa-mir-629|mir-629	microRNA 629	ncRNA
10_siC_WDR5_peak_7687	chr19	50369990	50370936	+	1208	NA	5' UTR (NM_007254, exon 2 of 17)	5' UTR (NM_007254, exon 2 of 17)	370	NM_007254	11284	Hs.78016	NM_007254	ENSG00000039650	PNKP	AOA4|EIEE10|MCSZ|PNK	polynucleotide kinase 3'-phosphatase	protein-coding
10_siC_WDR5_peak_13860	chr7	150924045	150924952	+	1205	NA	promoter-TSS (NM_007189)	promoter-TSS (NM_007189)	-38	NM_005692	114483834	Hs.654958	NM_005692		LOC114483834	-	ABCF2-H2B readthrough	protein-coding
10_siC_WDR5_peak_9452	chr20	60813221	60814062	+	1204	NA	promoter-TSS (NM_144498)	promoter-TSS (NM_144498)	64	NM_144498	9885	Hs.473254	NM_014835	ENSG00000130703	OSBPL2	DFNA67|DNFA67|ORP-2|ORP2	oxysterol binding protein like 2	protein-coding
10_siC_WDR5_peak_1750	chr10	51827191	51827981	+	1204	NA	promoter-TSS (NR_038275)	promoter-TSS (NR_038275)	-23	NR_038275	100421577	Hs.712902	NR_038275	ENSG00000235618	FAM21EP	-	family with sequence similarity 21, member A pseudogene	pseudo
10_siC_WDR5_peak_10124	chr3	47563574	47564349	+	1204	NA	Intergenic	Intergenic	-8759	NM_001031703	54859	Hs.311100	NM_017713	ENSG00000163832	ELP6	C3orf75|TMEM103	elongator acetyltransferase complex subunit 6	protein-coding
10_siC_WDR5_peak_13568	chr7	99697903	99699505	+	1203	NA	promoter-TSS (NM_182776)	promoter-TSS (NM_182776)	-301	NM_182776	4176	Hs.438720	NM_005916	ENSG00000166508	MCM7	CDC47|MCM2|P1.1-MCM3|P1CDC47|P85MCM|PNAS146|PPP1R104	minichromosome maintenance complex component 7	protein-coding
10_siC_WDR5_peak_11222	chr4	166248425	166249371	+	1203	NA	promoter-TSS (NM_006745)	promoter-TSS (NM_006745)	77	NM_006745	6307	Hs.105269	NM_006745	ENSG00000052802	MSMO1	DESP4|ERG25|MCCPD|SC4MOL	methylsterol monooxygenase 1	protein-coding
10_siC_WDR5_peak_9971	chr3	14257919	14258607	+	1202	NA	Intergenic	MER117|DNA|hAT-Charlie	37946	NM_014463	27258	Hs.111632	NM_014463	ENSG00000170860	LSM3	SMX4|USS2|YLR438C	LSM3 homolog, U6 small nuclear RNA and mRNA degradation associated	protein-coding
10_siC_WDR5_peak_14206	chr8	74883994	74885080	+	1202	NA	promoter-TSS (NM_001204864)	promoter-TSS (NM_001204864)	-15	NM_001204860	6921	Hs.533437	NM_005648	ENSG00000154582	ELOC	SIII|TCEB1	elongin C	protein-coding
10_siC_WDR5_peak_5250	chr16	1470523	1471094	+	1199	NA	promoter-TSS (NM_001272051)	promoter-TSS (NM_001272051)	-60	NM_001272051	283951	Hs.58373	NM_001010878	ENSG00000174109	C16orf91	CCSMST1|URLC5|gs103	chromosome 16 open reading frame 91	protein-coding
10_siC_WDR5_peak_14144	chr8	56684892	56686263	+	1198	NA	promoter-TSS (NM_001317902)	promoter-TSS (NM_001317902)	360	NM_001363176	137695	Hs.420076	NM_152417	ENSG00000167904	TMEM68	-	transmembrane protein 68	protein-coding
10_siC_WDR5_peak_12822	chr6	131948948	131949595	+	1197	NA	5' UTR (NM_001270521, exon 1 of 30)	5' UTR (NM_001270521, exon 1 of 30)	111	NM_001270522	9439	Hs.29679	NM_004830	ENSG00000112282	MED23	ARC130|CRSP130|CRSP133|CRSP3|DRIP130|MRT18|SUR-2|SUR2	mediator complex subunit 23	protein-coding
10_siC_WDR5_peak_4258	chr14	45604887	45605440	+	1193	NA	promoter-TSS (NM_020937)	promoter-TSS (NM_020937)	21	NM_001308134	57697	Hs.509229	NM_020937	ENSG00000187790	FANCM	FAAP250|KIAA1596|POF15|SPGF28	FA complementation group M	protein-coding
10_siC_WDR5_peak_14373	chr8	121457134	121457907	+	1193	NA	promoter-TSS (NM_022045)	promoter-TSS (NM_022045)	-130	NM_014078	28998	Hs.333823	NM_014078	ENSG00000172172	MRPL13	L13|L13A|L13mt|RPL13|RPML13	mitochondrial ribosomal protein L13	protein-coding
10_siC_WDR5_peak_2944	chr12	1913678	1914045	+	1193	NA	intron (NM_172364, intron 29 of 37)	MLT1J|LTR|ERVL-MaLR	-15572	NM_001163925	654429	Hs.585579	NM_001039029	ENSG00000166159	LRTM2	-	leucine rich repeats and transmembrane domains 2	protein-coding
10_siC_WDR5_peak_11598	chr5	82372841	82373872	+	1193	NA	promoter-TSS (NM_003401)	promoter-TSS (NM_003401)	-10	NM_003401	7518	Hs.567359	NM_003401	ENSG00000152422	XRCC4	SSMED	X-ray repair cross complementing 4	protein-coding
10_siC_WDR5_peak_15285	chrX	70287595	70288748	+	1193	NA	promoter-TSS (NM_013346)	promoter-TSS (NM_013346)	13	NM_013346	29934	Hs.260750	NM_013346	ENSG00000147164	SNX12	-	sorting nexin 12	protein-coding
10_siC_WDR5_peak_8326	chr2	73964003	73964857	+	1193	NA	promoter-TSS (NM_016058)	promoter-TSS (NM_016058)	-42	NM_001330388	51002	Hs.157401	NM_016058	ENSG00000144034	TPRKB	CGI-121|CGI121|GAMOS5	TP53RK binding protein	protein-coding
10_siC_WDR5_peak_7208	chr19	11485059	11485946	+	1193	NA	exon (NM_175871, exon 1 of 2)	exon (NM_175871, exon 1 of 2)	119	NM_175871	126074	Hs.631619	NM_175871	ENSG00000173928	SWSAP1	C19orf39|SWS1AP1|ZSWIM7AP1	SWIM-type zinc finger 7 associated protein 1	protein-coding
10_siC_WDR5_peak_5282	chr16	2653133	2653688	+	1191	NA	promoter-TSS (NR_015441)	promoter-TSS (NR_015441)	25	NR_015441	652276	Hs.720448	NR_015441	ENSG00000215154	LOC652276	-	potassium channel tetramerization domain containing 5 pseudogene	pseudo
10_siC_WDR5_peak_4791	chr15	52093665	52094166	+	1184	NA	intron (NM_014548, intron 8 of 9)	intron (NM_014548, intron 8 of 9)	-27935	NM_014547	29766	Hs.4998	NM_014547	ENSG00000138594	TMOD3	UTMOD	tropomodulin 3	protein-coding
10_siC_WDR5_peak_2044	chr10	105155858	105156658	+	1183	NA	promoter-TSS (NM_032747)	promoter-TSS (NM_032747)	-26	NM_001206427	84833	Hs.500921	NM_032747	ENSG00000173915	ATP5MD	DAPIT|HCVFTP2|USMG5|bA792D24.4	ATP synthase membrane subunit DAPIT	protein-coding
10_siC_WDR5_peak_3183	chr12	48499398	48500289	+	1182	NA	promoter-TSS (NM_001354737)	promoter-TSS (NM_001354737)	19	NM_001267594	29843	Hs.371957	NM_014554	ENSG00000079387	SENP1	SuPr-2	SUMO specific peptidase 1	protein-coding
10_siC_WDR5_peak_8348	chr2	74775402	74776858	+	1181	NA	promoter-TSS (NM_001197260)	promoter-TSS (NM_001197260)	-17	NM_001197260	1796	Hs.103854	NM_001381	ENSG00000115325	DOK1	P62DOK|pp62	docking protein 1	protein-coding
10_siC_WDR5_peak_3289	chr12	56435395	56436158	+	1181	NA	promoter-TSS (NM_001029)	promoter-TSS (NM_001029)	74	NM_001029	6231	Hs.447562	NM_001029	ENSG00000197728	RPS26	DBA10|S26|eS26	ribosomal protein S26	protein-coding
10_siC_WDR5_peak_5906	chr17	12920942	12921748	+	1181	NA	promoter-TSS (NM_001165962)	promoter-TSS (NM_001165962)	-1	NM_018127	60528	Hs.434232	NM_018127	ENSG00000006744	ELAC2	COXPD17|ELC2|HPC2	elaC ribonuclease Z 2	protein-coding
10_siC_WDR5_peak_11966	chr5	170171249	170171731	+	1177	NA	Intergenic	CpG	-39233	NM_001291985	2568	Hs.26225	NM_014211	ENSG00000094755	GABRP	-	gamma-aminobutyric acid type A receptor pi subunit	protein-coding
10_siC_WDR5_peak_7426	chr19	35167701	35168939	+	1177	NA	promoter-TSS (NM_018443)	promoter-TSS (NM_018443)	-224	NM_001289183	55900	Hs.436350	NM_018443	ENSG00000089335	ZNF302	HSD16|MST154|MSTP154|ZNF135L|ZNF140L|ZNF327	zinc finger protein 302	protein-coding
10_siC_WDR5_peak_5363	chr16	12009031	12010317	+	1176	NA	5' UTR (NM_001130006, exon 1 of 15)	5' UTR (NM_001130006, exon 1 of 15)	139	NM_002094	2935	Hs.528780	NM_002094	ENSG00000103342	GSPT1	551G9.2|ETF3A|GST1|eRF3a	G1 to S phase transition 1	protein-coding
10_siC_WDR5_peak_5042	chr15	78614596	78615088	+	1175	NA	Intergenic	Intergenic	-17853	NM_004378	1381	Hs.346950	NM_004378	ENSG00000166426	CRABP1	CRABP|CRABP-I|CRABPI|RBP5	cellular retinoic acid binding protein 1	protein-coding
10_siC_WDR5_peak_6124	chr17	39942949	39943524	+	1175	NA	promoter-TSS (NM_001352774)	promoter-TSS (NM_001352774)	-216	NM_001352776	3728	Hs.514174	NM_002230	ENSG00000173801	JUP	CTNNG|DP3|DPIII|PDGB|PKGB	junction plakoglobin	protein-coding
10_siC_WDR5_peak_9727	chr22	29999057	29999890	+	1175	NA	promoter-TSS (NM_000268)	promoter-TSS (NM_000268)	-72	NM_000268	4771	Hs.187898	NM_000268	ENSG00000186575	NF2	ACN|BANF|SCH	neurofibromin 2	protein-coding
10_siC_WDR5_peak_6902	chr18	46065752	46067278	+	1175	NA	intron (NM_001142397, intron 2 of 12)	CpG-11781	1113	NM_001142397	9811	Hs.145230	NM_014772	ENSG00000134030	CTIF	Gm672|KIAA0427	cap binding complex dependent translation initiation factor	protein-coding
10_siC_WDR5_peak_4776	chr15	49912875	49913542	+	1171	NA	promoter-TSS (NM_001144955)	promoter-TSS (NM_001144955)	-37	NM_020234	56986	Hs.127432	NM_020234	ENSG00000104047	DTWD1	MDS009	DTW domain containing 1	protein-coding
10_siC_WDR5_peak_13701	chr7	129690801	129691574	+	1171	NA	promoter-TSS (NM_001363701)	promoter-TSS (NM_001363701)	38	NM_001363701	51530	Hs.194157	NM_016478	ENSG00000091732	ZC3HC1	HSPC216|NIPA	zinc finger C3HC-type containing 1	protein-coding
10_siC_WDR5_peak_5154	chr15	90895091	90895727	+	1171	NA	promoter-TSS (NM_001004309)	promoter-TSS (NM_001004309)	-107	NM_001004309	342132	Hs.55307	NM_001004309	ENSG00000196391	ZNF774	-	zinc finger protein 774	protein-coding
10_siC_WDR5_peak_2420	chr11	46401889	46403096	+	1171	NA	promoter-TSS (NM_001270552)	promoter-TSS (NM_001270552)	-126	NM_001012334	4192	Hs.82045	NM_002391	ENSG00000110492	MDK	ARAP|MK|NEGF2	midkine	protein-coding
10_siC_WDR5_peak_6169	chr17	41533978	41534507	+	1170	NA	Intergenic	Intergenic	12068	NR_031751	100313779		NR_031751	ENSG00000284344	MIR2117	-	microRNA 2117	ncRNA
10_siC_WDR5_peak_4576	chr14	100842355	100843063	+	1170	NA	promoter-TSS (NM_173701)	promoter-TSS (NM_173701)	-44	NM_001350949	79446	Hs.497599	NM_024515	ENSG00000176473	WDR25	C14orf67	WD repeat domain 25	protein-coding
10_siC_WDR5_peak_8824	chr2	201827913	201828982	+	1170	NA	promoter-TSS (NR_033915)	promoter-TSS (NR_033915)	-64	NM_006190	4999	Hs.444870	NM_006190	ENSG00000115942	ORC2	ORC2L	origin recognition complex subunit 2	protein-coding
10_siC_WDR5_peak_13438	chr7	73588174	73589342	+	1169	NA	promoter-TSS (NM_022170)	promoter-TSS (NM_022170)	72	NM_022170	7458	Hs.520943	NM_022170	ENSG00000106682	EIF4H	WBSCR1|WSCR1|eIF-4H	eukaryotic translation initiation factor 4H	protein-coding
10_siC_WDR5_peak_447	chr1	63988658	63989463	+	1169	NA	promoter-TSS (NM_032437)	promoter-TSS (NM_032437)	-116	NM_001347147	23421	Hs.166539	NM_014288	ENSG00000142856	ITGB3BP	CENP-R|CENPR|HSU37139|NRIF3|TAP20	integrin subunit beta 3 binding protein	protein-coding
10_siC_WDR5_peak_4597	chr14	104181427	104182378	+	1168	NA	promoter-TSS (NM_001100118)	promoter-TSS (NM_001100118)	-114	NM_005432	7517	Hs.592325	NM_005432	ENSG00000126215	XRCC3	CMM6	X-ray repair cross complementing 3	protein-coding
10_siC_WDR5_peak_7792	chr19	58089937	58090571	+	1167	NA	promoter-TSS (NM_001353405)	promoter-TSS (NM_001353405)	25	NM_017879	55659	Hs.247711	NM_017879	ENSG00000083817	ZNF416	-	zinc finger protein 416	protein-coding
10_siC_WDR5_peak_6344	chr17	52863079	52863582	+	1165	NA	Intergenic	Intergenic	-114722	NM_001321175	10040	Hs.153504	NM_005486	ENSG00000141198	TOM1L1	SRCASM	target of myb1 like 1 membrane trafficking protein	protein-coding
10_siC_WDR5_peak_9158	chr20	18268552	18269424	+	1165	NA	promoter-TSS (NM_001283002)	promoter-TSS (NM_001283002)	116	NM_001283000	7692	Hs.472221	NM_003434	ENSG00000125846	ZNF133	ZNF150|pHZ-13|pHZ-66	zinc finger protein 133	protein-coding
10_siC_WDR5_peak_8826	chr2	201936303	201936941	+	1165	NA	promoter-TSS (NM_001321621)	promoter-TSS (NM_001321621)	-102	NM_002491	4709	Hs.109760	NM_002491	ENSG00000119013	NDUFB3	B12|CI-B12|MC1DN25	NADH:ubiquinone oxidoreductase subunit B3	protein-coding
10_siC_WDR5_peak_13422	chr7	72298526	72299126	+	1163	NA	promoter-TSS (NM_001145440)	promoter-TSS (NM_001145440)	-47	NM_001145440	441250	Hs.488614	NM_001145440	ENSG00000277149	TYW1B	LINC00069|NCRNA00069|RSAFD2	tRNA-yW synthesizing protein 1 homolog B	protein-coding
10_siC_WDR5_peak_3252	chr12	53845607	53846818	+	1163	NA	intron (NM_001128911, intron 1 of 14)	CpG	326	NM_031989	5094	Hs.546271	NM_005016	ENSG00000197111	PCBP2	HNRNPE2|HNRPE2|hnRNP-E2	poly(rC) binding protein 2	protein-coding
10_siC_WDR5_peak_11842	chr5	145582708	145583529	+	1162	NA	promoter-TSS (NM_018989)	promoter-TSS (NM_018989)	-50	NM_018989	54439	Hs.61441	NM_018989	ENSG00000091009	RBM27	ARRS1|Psc1|ZC3H18|ZC3H20	RNA binding motif protein 27	protein-coding
10_siC_WDR5_peak_5153	chr15	90808369	90809410	+	1161	NA	promoter-TSS (NR_028052)	promoter-TSS (NR_028052)	-6	NR_028052	51335	Hs.135471	NM_016645	ENSG00000182768	NGRN	DSC92	neugrin, neurite outgrowth associated	protein-coding
10_siC_WDR5_peak_8275	chr2	67929328	67929775	+	1160	NA	Intergenic	Intergenic	123143	NR_110271	101927701	Hs.348697	NR_110271	ENSG00000237013	LINC01812	-	long intergenic non-protein coding RNA 1812	ncRNA
10_siC_WDR5_peak_9900	chr22	50639017	50639709	+	1160	NA	promoter-TSS (NM_031454)	promoter-TSS (NM_031454)	-77	NM_031454	83642	Hs.365405	NM_031454	ENSG00000073169	SELENOO	SELO	selenoprotein O	protein-coding
10_siC_WDR5_peak_6193	chr17	42264150	42264719	+	1159	NA	promoter-TSS (NM_001353186)	promoter-TSS (NM_001353186)	94	NM_001353178	79089	Hs.181391	NM_024107	ENSG00000168591	TMUB2	FP2653	transmembrane and ubiquitin like domain containing 2	protein-coding
10_siC_WDR5_peak_4140	chr13	112225167	112225920	+	1159	NA	Intergenic	Intergenic	-22813	NR_135814	105370369		NR_135814	ENSG00000215881	LINC02337	-	long intergenic non-protein coding RNA 2337	ncRNA
10_siC_WDR5_peak_8053	chr2	32502800	32503533	+	1158	NA	5' UTR (NM_032312, exon 1 of 6)	5' UTR (NM_032312, exon 1 of 6)	193	NM_032312	84272	Hs.468099	NM_032312	ENSG00000119820	YIPF4	FinGER4|Nbla11189	Yip1 domain family member 4	protein-coding
10_siC_WDR5_peak_14110	chr8	41909291	41909956	+	1158	NA	promoter-TSS (NM_006766)	promoter-TSS (NM_006766)	-118	NM_006766	7994	Hs.491577	NM_006766	ENSG00000083168	KAT6A	MOZ|MRD32|MYST-3|MYST3|RUNXBP2|ZC2HC6A|ZNF220	lysine acetyltransferase 6A	protein-coding
10_siC_WDR5_peak_7437	chr19	36248309	36249444	+	1158	NA	promoter-TSS (NM_001367856)	promoter-TSS (NM_001367856)	-201	NM_001039887	148137	Hs.527982	NM_144692	ENSG00000167595	PROSER3	C19orf55	proline and serine rich 3	protein-coding
10_siC_WDR5_peak_9640	chr22	19434901	19435778	+	1158	NA	5' UTR (NM_173793, exon 1 of 3)	5' UTR (NM_173793, exon 1 of 3)	416	NM_173793	128977	Hs.659565	NM_173793	ENSG00000242259	C22orf39	-	chromosome 22 open reading frame 39	protein-coding
10_siC_WDR5_peak_10173	chr3	51422194	51422958	+	1155	NA	promoter-TSS (NM_006010)	promoter-TSS (NM_006010)	-146	NM_006010	7873	Hs.436446	NM_006010	ENSG00000145050	MANF	ARMET|ARP	mesencephalic astrocyte derived neurotrophic factor	protein-coding
10_siC_WDR5_peak_6997	chr18	72264289	72265753	+	1153	NA	promoter-TSS (NR_024484)	promoter-TSS (NR_024484)	50	NR_024484	400657	Hs.61508	NM_001008234	ENSG00000264247	LINC00909	-	long intergenic non-protein coding RNA 909	ncRNA
10_siC_WDR5_peak_8292	chr2	70313350	70315211	+	1153	NA	promoter-TSS (NM_006196)	promoter-TSS (NM_006196)	-133	NR_033872	400960	Hs.683864	NR_033872	ENSG00000179818	PCBP1-AS1	-	PCBP1 antisense RNA 1	ncRNA
10_siC_WDR5_peak_3019	chr12	12837317	12837811	+	1152	NA	intron (NM_006143, intron 2 of 3)	intron (NM_006143, intron 2 of 3)	11553	NM_006143	2842	Hs.657862	NM_006143	ENSG00000183150	GPR19	-	G protein-coupled receptor 19	protein-coding
10_siC_WDR5_peak_2791	chr11	112482016	112482845	+	1152	NA	Intergenic	Intergenic	-55905	NR_104155	387810	Hs.512255	NR_104155	ENSG00000255484	LINC02764	-	long intergenic non-protein coding RNA 2764	ncRNA
10_siC_WDR5_peak_3303	chr12	56726921	56728401	+	1151	NA	promoter-TSS (NM_001127460)	promoter-TSS (NM_001127460)	123	NM_014871	9924	Hs.273397	NM_014871	ENSG00000135473	PAN2	USP52	poly(A) specific ribonuclease subunit PAN2	protein-coding
10_siC_WDR5_peak_1481	chr1	236958214	236958971	+	1151	NA	promoter-TSS (NM_000254)	promoter-TSS (NM_000254)	0	NM_001291940	4548	Hs.498187	NM_000254	ENSG00000116984	MTR	HMAG|MS|cblG	5-methyltetrahydrofolate-homocysteine methyltransferase	protein-coding
10_siC_WDR5_peak_7789	chr19	58011019	58011408	+	1150	NA	promoter-TSS (NM_001304337)	promoter-TSS (NM_001304337)	-9	NM_001304334	374928	Hs.579576	NM_198542	ENSG00000152439	ZNF773	ZNF419B	zinc finger protein 773	protein-coding
10_siC_WDR5_peak_3698	chr12	120638444	120639300	+	1150	NA	promoter-TSS (NR_038924)	promoter-TSS (NR_038924)	42	NM_001002	6175	Hs.546285	NM_001002	ENSG00000089157	RPLP0	L10E|LP0|P0|PRLP0|RPP0	ribosomal protein lateral stalk subunit P0	protein-coding
10_siC_WDR5_peak_1031	chr1	169862620	169864075	+	1149	NA	promoter-TSS (NM_020423)	promoter-TSS (NM_020423)	-247	NM_181093	57147	Hs.435560	NM_020423	ENSG00000000457	SCYL3	PACE-1|PACE1	SCY1 like pseudokinase 3	protein-coding
10_siC_WDR5_peak_6136	chr17	40540137	40541208	+	1148	NA	promoter-TSS (NM_001369519)	promoter-TSS (NM_001369519)	-159	NM_139276	6774	Hs.463059	NM_003150	ENSG00000168610	STAT3	ADMIO|ADMIO1|APRF|HIES	signal transducer and activator of transcription 3	protein-coding
10_siC_WDR5_peak_2305	chr11	18343520	18344513	+	1147	NA	promoter-TSS (NM_181508)	promoter-TSS (NM_181508)	-98	NM_005316	2965	Hs.577202	NM_005316	ENSG00000110768	GTF2H1	BTF2|P62|TFB1|TFIIH	general transcription factor IIH subunit 1	protein-coding
10_siC_WDR5_peak_9641	chr22	19466525	19467792	+	1147	NA	promoter-TSS (NM_001178011)	promoter-TSS (NM_001178011)	169	NM_001369291	8318	Hs.474217	NM_003504	ENSG00000093009	CDC45	CDC45L|CDC45L2|MGORS7|PORC-PI-1	cell division cycle 45	protein-coding
10_siC_WDR5_peak_3264	chr12	54582383	54583044	+	1147	NA	promoter-TSS (NM_001351246)	promoter-TSS (NM_001351246)	28	NM_001351253	23583	Hs.632721	NM_014311	ENSG00000123415	SMUG1	FDG|HMUDG|UNG3	single-strand-selective monofunctional uracil-DNA glycosylase 1	protein-coding
10_siC_WDR5_peak_14068	chr8	36877433	36878608	+	1146	NA	Intergenic	Intergenic	-101451	NR_031672	100302233		NR_031672	ENSG00000221641	MIR1268A	MIR1268|MIRN1268|hsa-mir-1268|hsa-mir-1268a	microRNA 1268a	ncRNA
10_siC_WDR5_peak_13294	chr7	44529878	44530675	+	1144	NA	promoter-TSS (NM_015332)	promoter-TSS (NM_015332)	-19	NM_015332	23386	Hs.488171	NM_015332	ENSG00000015676	NUDCD3	NudCL	NudC domain containing 3	protein-coding
10_siC_WDR5_peak_7557	chr19	42900633	42902005	+	1144	NA	promoter-TSS (NR_126041)	promoter-TSS (NR_126041)	19	NR_073180	100996307	Hs.466840	NR_073179	ENSG00000213904	LIPE-AS1	-	LIPE antisense RNA 1	ncRNA
10_siC_WDR5_peak_7075	chr19	2739781	2740401	+	1143	NA	promoter-TSS (NM_144564)	promoter-TSS (NM_144564)	-17	NM_213568	29985	Hs.515046	NM_144564	ENSG00000141873	SLC39A3	ZIP-3|ZIP3	solute carrier family 39 member 3	protein-coding
10_siC_WDR5_peak_929	chr1	156710520	156711341	+	1142	NA	promoter-TSS (NM_145729)	promoter-TSS (NM_145729)	-50	NM_024540	79590	Hs.418233	NM_024540	ENSG00000143314	MRPL24	L24mt|MRP-L18|MRP-L24	mitochondrial ribosomal protein L24	protein-coding
10_siC_WDR5_peak_13507	chr7	91053690	91054043	+	1142	NA	Intergenic	Intergenic	160118	NM_003505	8321	Hs.94234	NM_003505	ENSG00000157240	FZD1	-	frizzled class receptor 1	protein-coding
10_siC_WDR5_peak_3321	chr12	57482265	57483745	+	1142	NA	5' UTR (NM_001330305, exon 1 of 6)	5' UTR (NM_001330305, exon 1 of 6)	108	NM_001330305	4665	Hs.159223	NM_005967	ENSG00000166886	NAB2	MADER	NGFI-A binding protein 2	protein-coding
10_siC_WDR5_peak_6282	chr17	47492081	47492683	+	1141	NA	promoter-TSS (NM_001281715)	promoter-TSS (NM_001281715)	-115	NM_001281497	5245	Hs.514303	NM_002634	ENSG00000167085	PHB	HEL-215|HEL-S-54e|PHB1	prohibitin	protein-coding
10_siC_WDR5_peak_350	chr1	54665420	54666310	+	1141	NA	promoter-TSS (NM_001353356)	promoter-TSS (NM_001353356)	25	NM_016491	51253	Hs.584908	NM_016491	ENSG00000116221	MRPL37	L2mt|L37mt|MRP-L2|MRP-L37|MRPL2|RPML2	mitochondrial ribosomal protein L37	protein-coding
10_siC_WDR5_peak_2784	chr11	111944648	111945422	+	1138	NA	promoter-TSS (NM_138789)	promoter-TSS (NM_138789)	12	NM_001082969	55216	Hs.195060	NM_018195	ENSG00000150776	NKAPD1	C11orf57	NKAP domain containing 1	protein-coding
10_siC_WDR5_peak_4314	chr14	55878136	55878830	+	1138	NA	promoter-TSS (NM_014924)	promoter-TSS (NM_014924)	93	NM_014924	22863	Hs.414809	NM_014924	ENSG00000126775	ATG14	ATG14L|BARKOR|KIAA0831	autophagy related 14	protein-coding
10_siC_WDR5_peak_4198	chr14	24583113	24584567	+	1138	NA	promoter-TSS (NR_028099)	promoter-TSS (NR_028099)	-66	NM_001163484	80344	Hs.525251	NM_025230	ENSG00000100897	DCAF11	GL014|PRO2389|WDR23	DDB1 and CUL4 associated factor 11	protein-coding
10_siC_WDR5_peak_6393	chr17	55888465	55889257	+	1136	NA	Intergenic	Intergenic	38544	NM_016070	51649	Hs.5836	NM_016070	ENSG00000181610	MRPS23	CGI-138|HSPC329|MRP-S23	mitochondrial ribosomal protein S23	protein-coding
10_siC_WDR5_peak_12646	chr6	97052463	97052945	+	1135	NA	exon (NM_001322466, exon 3 of 6)	exon (NM_001322466, exon 3 of 6)	41703	NM_001322467	9457	Hs.632608	NM_020482	ENSG00000112214	FHL5	1700027G07Rik|ACT|FHL-5|dJ393D12.2	four and a half LIM domains 5	protein-coding
10_siC_WDR5_peak_12322	chr6	31632793	31634106	+	1133	NA	promoter-TSS (NM_001320)	promoter-TSS (NM_001320)	-42	NM_001199240	7918	Hs.247478	NM_033177	ENSG00000204438	GPANK1	ANKRD59|BAT4|D6S54E|G5|GPATCH10	G-patch domain and ankyrin repeats 1	protein-coding
10_siC_WDR5_peak_6274	chr17	46969418	46970407	+	1133	NA	promoter-TSS (NM_005175)	promoter-TSS (NM_005175)	-237	NM_001002027	516	Hs.80986	NM_005175	ENSG00000159199	ATP5MC1	ATP5A|ATP5G|ATP5G1	ATP synthase membrane subunit c locus 1	protein-coding
10_siC_WDR5_peak_7009	chr18	77438991	77440205	+	1131	NA	promoter-TSS (NM_001318511)	promoter-TSS (NM_001318511)	147	NR_136643	284241		NR_136643	ENSG00000178412	LOC284241	-	uncharacterized LOC284241	ncRNA
10_siC_WDR5_peak_14628	chr9	35071885	35073188	+	1129	NA	promoter-TSS (NM_001354928)	promoter-TSS (NM_001354928)	86	NM_007126	7415	Hs.529782	NM_007126	ENSG00000165280	VCP	CDC48|TERA|p97	valosin containing protein	protein-coding
10_siC_WDR5_peak_5759	chr16	89556840	89557570	+	1126	NA	promoter-TSS (NM_001256183)	promoter-TSS (NM_001256183)	-236	NR_045839	29123	Hs.335003	NM_013275	ENSG00000167522	ANKRD11	ANCO-1|ANCO1|LZ16|T13	ankyrin repeat domain 11	protein-coding
10_siC_WDR5_peak_10585	chr3	169072515	169072876	+	1125	NA	intron (NM_001205194, intron 1 of 15)	intron (NM_001205194, intron 1 of 15)	-92960	NR_134932	105374205		NR_134932	ENSG00000241479	LOC105374205	-	uncharacterized LOC105374205	ncRNA
10_siC_WDR5_peak_4450	chr14	76934237	76934542	+	1121	NA	intron (NM_004452, intron 5 of 10)	intron (NM_004452, intron 5 of 10)	96699	NM_004452	2103	Hs.435845	NM_004452	ENSG00000119715	ESRRB	DFNB35|ERR2|ERRb|ESRL2|NR3B2	estrogen related receptor beta	protein-coding
10_siC_WDR5_peak_3317	chr12	57472172	57472904	+	1121	NA	promoter-TSS (NM_015257)	promoter-TSS (NM_015257)	36	NM_001130963	23306	Hs.591040	NM_015257	ENSG00000166881	NEMP1	TMEM194|TMEM194A	nuclear envelope integral membrane protein 1	protein-coding
10_siC_WDR5_peak_12569	chr6	80246453	80247715	+	1121	NA	promoter-TSS (NM_181714)	promoter-TSS (NM_181714)	63	NM_001122769	167691	Hs.21945	NM_181714	ENSG00000135338	LCA5	C6orf152	lebercilin LCA5	protein-coding
10_siC_WDR5_peak_12216	chr6	24775003	24776008	+	1121	NA	promoter-TSS (NM_001251991)	promoter-TSS (NM_001251991)	-136	NM_001251991	51053	Hs.234896	NM_015895	ENSG00000112312	GMNN	Gem|MGORS6	geminin DNA replication inhibitor	protein-coding
10_siC_WDR5_peak_4921	chr15	69112806	69113796	+	1120	NA	promoter-TSS (NM_006305)	promoter-TSS (NM_006305)	-67	NM_006305	8125	Hs.458747	NM_006305	ENSG00000140350	ANP32A	C15orf1|HPPCn|I1PP2A|LANP|MAPM|PHAP1|PHAPI|PP32	acidic nuclear phosphoprotein 32 family member A	protein-coding
10_siC_WDR5_peak_10473	chr3	131221473	131222056	+	1119	NA	promoter-TSS (NM_007208)	promoter-TSS (NM_007208)	51	NM_007208	11222	Hs.205163	NM_007208	ENSG00000114686	MRPL3	COXPD9|MRL3|RPML3	mitochondrial ribosomal protein L3	protein-coding
10_siC_WDR5_peak_1792	chr10	69523327	69524297	+	1119	NA	Intergenic	Intergenic	-67859	NM_013266	29119	Hs.21375	NM_013266	ENSG00000183230	CTNNA3	ARVD13|VR22	catenin alpha 3	protein-coding
10_siC_WDR5_peak_6732	chr17	80009618	80010026	+	1119	NA	promoter-TSS (NM_001321092)	promoter-TSS (NM_001321092)	48	NM_001330541	2873	Hs.268530	NM_004127	ENSG00000169727	GPS1	COPS1|CSN1|SGN1	G protein pathway suppressor 1	protein-coding
10_siC_WDR5_peak_12968	chr6	160389684	160390222	+	1117	NA	promoter-TSS (NM_000876)	promoter-TSS (NM_000876)	-178	NM_000876	3482	Hs.487062	NM_000876	ENSG00000197081	IGF2R	CD222|CI-M6PR|CIMPR|M6P-R|M6P/IGF2R|MPR 300|MPR1|MPR300|MPRI	insulin like growth factor 2 receptor	protein-coding
10_siC_WDR5_peak_12269	chr6	28048457	28049152	+	1116	NA	5' UTR (NM_003447, exon 1 of 4)	5' UTR (NM_003447, exon 1 of 4)	458	NM_003447	7718	Hs.55481	NM_003447	ENSG00000197279	ZNF165	CT53|LD65|ZSCAN7	zinc finger protein 165	protein-coding
10_siC_WDR5_peak_408	chr1	60280113	60280822	+	1115	NA	promoter-TSS (NM_015888)	promoter-TSS (NM_015888)	-154	NM_015888	51361	Hs.378836	NM_015888	ENSG00000134709	HOOK1	HK1	hook microtubule tethering protein 1	protein-coding
10_siC_WDR5_peak_5673	chr16	70332922	70333595	+	1115	NA	intron (NM_001014449, intron 1 of 9)	intron (NM_001014449, intron 1 of 9)	302	NM_001257175	11269	Hs.221761	NM_007242	ENSG00000157349	DDX19B	DBP5|DDX19|RNAh	DEAD-box helicase 19B	protein-coding
10_siC_WDR5_peak_2139	chr10	124913450	124914239	+	1115	NA	promoter-TSS (NM_004725)	promoter-TSS (NM_004725)	-74	NM_004725	9184	Hs.418533	NM_004725	ENSG00000154473	BUB3	BUB3L|hBUB3	BUB3 mitotic checkpoint protein	protein-coding
10_siC_WDR5_peak_6750	chr17	80656038	80657157	+	1115	NA	promoter-TSS (NM_006822)	promoter-TSS (NM_006822)	-23	NM_006822	10966	Hs.484068	NM_006822	ENSG00000141542	RAB40B	RAR|SEC4L	RAB40B, member RAS oncogene family	protein-coding
10_siC_WDR5_peak_8014	chr2	27886190	27886995	+	1114	NA	promoter-TSS (NM_014860)	promoter-TSS (NM_014860)	-111	NM_014860	9913	Hs.6232	NM_014860	ENSG00000119760	SUPT7L	SPT7L|STAF65|STAF65(gamma)|STAF65G|SUPT7H	SPT7 like, STAGA complex gamma subunit	protein-coding
10_siC_WDR5_peak_8238	chr2	63815442	63816602	+	1111	NA	promoter-TSS (NM_001199112)	promoter-TSS (NM_001199112)	-75	NM_001316374	4190	Hs.526521	NM_005917	ENSG00000014641	MDH1	HEL-S-32|MDH-s|MDHA|MGC:1375|MOR2	malate dehydrogenase 1	protein-coding
10_siC_WDR5_peak_6298	chr17	48172328	48173143	+	1110	NA	promoter-TSS (NM_002611)	promoter-TSS (NM_002611)	20	NM_002611	5164	Hs.256667	NM_002611	ENSG00000005882	PDK2	PDHK2|PDKII	pyruvate dehydrogenase kinase 2	protein-coding
10_siC_WDR5_peak_10221	chr3	58291775	58292516	+	1110	NA	5' UTR (NM_001098783, exon 1 of 6)	5' UTR (NM_001098783, exon 1 of 6)	173	NM_007042	11102	Hs.446320	NM_007042	ENSG00000163684	RPP14	P14	ribonuclease P/MRP subunit p14	protein-coding
10_siC_WDR5_peak_6808	chr18	14132005	14132677	+	1109	NA	promoter-TSS (NM_145287)	promoter-TSS (NM_145287)	93	NM_145287	162655	Hs.352635	NM_145287	ENSG00000175322	ZNF519	HsT2362	zinc finger protein 519	protein-coding
10_siC_WDR5_peak_10618	chr3	179322026	179322835	+	1109	NA	promoter-TSS (NM_020409)	promoter-TSS (NM_020409)	-4	NM_020409	57129	Hs.283734	NM_020409	ENSG00000136522	MRPL47	CGI-204|L47mt|MRP-L47|NCM1	mitochondrial ribosomal protein L47	protein-coding
10_siC_WDR5_peak_2029	chr10	104261791	104262839	+	1108	NA	intron (NM_005736, intron 1 of 10)	CpG	154	NM_005736	10121	Hs.153961	NM_005736	ENSG00000138107	ACTR1A	ARP1|Arp1A|CTRN1	actin related protein 1A	protein-coding
10_siC_WDR5_peak_15261	chrX	53254192	53254990	+	1108	NA	promoter-TSS (NR_148674)	promoter-TSS (NR_148674)	13	NM_001146702	8242	Hs.631768	NM_004187	ENSG00000126012	KDM5C	DXS1272E|JARID1C|MRX13|MRXJ|MRXSCJ|MRXSJ|SMCX|XE169	lysine demethylase 5C	protein-coding
10_siC_WDR5_peak_1570	chr10	6245192	6246038	+	1107	NA	intron (NM_001323017, intron 1 of 14)	CpG-2555	720	NM_001323017	5209	Hs.195471	NM_004566	ENSG00000170525	PFKFB3	IPFK2|PFK2|iPFK-2	6-phosphofructo-2-kinase/fructose-2,6-biphosphatase 3	protein-coding
10_siC_WDR5_peak_8798	chr2	197664092	197664726	+	1107	NA	promoter-TSS (NM_012086)	promoter-TSS (NM_012086)	-2	NM_012086	9330	Hs.470996	NM_012086	ENSG00000119041	GTF3C3	TFIIIC102|TFIIICgamma|TFiiiC2-102	general transcription factor IIIC subunit 3	protein-coding
10_siC_WDR5_peak_12406	chr6	37427731	37428329	+	1106	NA	intron (NM_015050, intron 10 of 23)	intron (NM_015050, intron 10 of 23)	27033	NM_015050	23070	Hs.520102	NM_015050	ENSG00000137200	CMTR1	FTSJD2|KIAA0082|MTr1|hMTr1	cap methyltransferase 1	protein-coding
10_siC_WDR5_peak_4110	chr13	101327012	101327399	+	1106	NA	promoter-TSS (NM_001350577)	promoter-TSS (NM_001350577)	-156	NM_001350577	84899	Hs.190983	NM_032813	ENSG00000125247	TMTC4	-	transmembrane O-mannosyltransferase targeting cadherins 4	protein-coding
10_siC_WDR5_peak_2640	chr11	72145216	72145833	+	1106	NA	promoter-TSS (NM_001258392)	promoter-TSS (NM_001258392)	51	NM_030813	81570	Hs.523877	NM_030813	ENSG00000162129	CLPB	ANKCLB|HSP78|MEGCANN|MGCA7|SKD3	ClpB homolog, mitochondrial AAA ATPase chaperonin	protein-coding
10_siC_WDR5_peak_9038	chr2	240322620	240323688	+	1105	NA	promoter-TSS (NR_135575)	promoter-TSS (NR_135575)	24	NR_135575	101928111	Hs.534680	NR_135575	ENSG00000222020	HDAC4-AS1	-	HDAC4 antisense RNA 1	ncRNA
10_siC_WDR5_peak_5332	chr16	5083524	5084173	+	1104	NA	promoter-TSS (NM_016256)	promoter-TSS (NM_016256)	88	NM_016256	51172	Hs.21334	NM_016256	ENSG00000103174	NAGPA	APAA|UCE	N-acetylglucosamine-1-phosphodiester alpha-N-acetylglucosaminidase	protein-coding
10_siC_WDR5_peak_13891	chr7	156742204	156742867	+	1104	NA	exon (NM_138400, exon 1 of 11)	exon (NM_138400, exon 1 of 11)	129	NM_001353366	64434	Hs.15825	NM_138400	ENSG00000146909	NOM1	C7orf3|PPP1R113|SGD1	nucleolar protein with MIF4G domain 1	protein-coding
10_siC_WDR5_peak_2685	chr11	77705498	77706267	+	1104	NA	promoter-TSS (NM_033547)	promoter-TSS (NM_033547)	-168	NM_033547	92105	Hs.533723	NM_033547	ENSG00000149262	INTS4	INT4|MST093	integrator complex subunit 4	protein-coding
10_siC_WDR5_peak_49	chr1	6844585	6845633	+	1102	NA	promoter-TSS (NR_149049)	promoter-TSS (NR_149049)	-69	NR_149049	110841581		NR_149049		CAMTA1-DT	lncCAMTA1	CAMTA1 divergent transcript	ncRNA
10_siC_WDR5_peak_6641	chr17	75368802	75369861	+	1101	NA	promoter-TSS (NM_001113493)	promoter-TSS (NM_001113493)	-88	NM_001113493	10801	Hs.440932	NM_006640	ENSG00000184640	SEPTIN9	AF17q25|MSF|MSF1|NAPB|PNUTL4|SEPT9|SINT1|SeptD1	septin 9	protein-coding
10_siC_WDR5_peak_4709	chr15	41624873	41625546	+	1101	NA	promoter-TSS (NM_001317860)	promoter-TSS (NM_001317860)	130	NM_018454	51203	Hs.615092	NM_016359	ENSG00000137804	NUSAP1	ANKT|BM037|LNP|NUSAP|PRO0310p1|Q0310|SAPL	nucleolar and spindle associated protein 1	protein-coding
10_siC_WDR5_peak_9693	chr22	24951070	24952188	+	1100	NA	promoter-TSS (NM_001284254)	promoter-TSS (NM_001284254)	11	NR_103819	6634	Hs.356549	NM_004175	ENSG00000100028	SNRPD3	SMD3|Sm-D3	small nuclear ribonucleoprotein D3 polypeptide	protein-coding
10_siC_WDR5_peak_12842	chr6	136571202	136571923	+	1098	NA	promoter-TSS (NM_001318738)	promoter-TSS (NM_001318738)	-113	NM_138419	113115	Hs.121536	NM_138419	ENSG00000146410	MTFR2	DUFD1|FAM54A	mitochondrial fission regulator 2	protein-coding
10_siC_WDR5_peak_6689	chr17	78518459	78519058	+	1098	NA	5' UTR (NM_020761, exon 1 of 34)	5' UTR (NM_020761, exon 1 of 34)	120	NM_001163034	57521	Hs.133044	NM_020761	ENSG00000141564	RPTOR	KOG1|Mip1	regulatory associated protein of MTOR complex 1	protein-coding
10_siC_WDR5_peak_14053	chr8	30601404	30602334	+	1096	NA	intron (NM_001282189, intron 1 of 8)	intron (NM_001282189, intron 1 of 8)	187	NM_001282199	7993	Hs.153678	NM_005671	ENSG00000104691	UBXN8	D8S2298E|REP8|UBXD6	UBX domain protein 8	protein-coding
10_siC_WDR5_peak_7379	chr19	23578050	23578548	+	1095	NA	promoter-TSS (NM_001300951)	promoter-TSS (NM_001300951)	-26	NM_003430	7644	Hs.58834	NM_003430	ENSG00000167232	ZNF91	HPF7|HTF10	zinc finger protein 91	protein-coding
10_siC_WDR5_peak_12874	chr6	144164158	144164989	+	1094	NA	promoter-TSS (NM_032860)	promoter-TSS (NM_032860)	98	NM_032860	84946	Hs.185675	NM_032860	ENSG00000135521	LTV1	C6orf93|dJ468K18.4	LTV1 ribosome biogenesis factor	protein-coding
10_siC_WDR5_peak_9230	chr20	32307835	32308412	+	1094	NA	promoter-TSS (NM_007238)	promoter-TSS (NM_007238)	-7	NM_007238	11264	Hs.654857	NM_007238	ENSG00000101417	PXMP4	PMP24	peroxisomal membrane protein 4	protein-coding
10_siC_WDR5_peak_15280	chrX	64754399	64754985	+	1093	NA	promoter-TSS (NM_001170649)	promoter-TSS (NM_001170649)	-6	NM_031206	81887	Hs.522675	NM_031206	ENSG00000001497	LAS1L	Las1-like|WTS|dJ475B7.2	LAS1 like, ribosome biogenesis factor	protein-coding
10_siC_WDR5_peak_8997	chr2	232645687	232646500	+	1093	NA	promoter-TSS (NM_001282949)	promoter-TSS (NM_001282949)	-56	NM_001291018	5147	Hs.516808	NM_002601	ENSG00000156973	PDE6D	JBTS22|PDED	phosphodiesterase 6D	protein-coding
10_siC_WDR5_peak_4536	chr14	94492489	94493016	+	1092	NA	promoter-TSS (NM_023112)	promoter-TSS (NM_023112)	66	NM_023112	78990	Hs.278815	NM_023112	ENSG00000089723	OTUB2	C14orf137|OTB2|OTU2	OTU deubiquitinase, ubiquitin aldehyde binding 2	protein-coding
10_siC_WDR5_peak_6455	chr17	60004675	60005435	+	1092	NA	5' UTR (NM_001351695, exon 1 of 25)	5' UTR (NM_001351695, exon 1 of 25)	288	NM_001330417	57508	Hs.279646	NM_020748	ENSG00000108506	INTS2	INT2|KIAA1287	integrator complex subunit 2	protein-coding
10_siC_WDR5_peak_9647	chr22	20067265	20068323	+	1091	NA	promoter-TSS (NM_022720)	promoter-TSS (NM_022720)	30	NM_022720	54487	Hs.643452	NM_022720	ENSG00000128191	DGCR8	C22orf12|DGCRK6|Gy1|pasha	DGCR8 microprocessor complex subunit	protein-coding
10_siC_WDR5_peak_6087	chr17	36981370	36982006	+	1090	NA	promoter-TSS (NR_039880)	promoter-TSS (NR_039880)	-85	NR_073428	54883	Hs.406223	NM_017748	ENSG00000273559	CWC25	CCDC49	CWC25 spliceosome associated protein homolog	protein-coding
10_siC_WDR5_peak_12302	chr6	30524176	30525501	+	1090	NA	5' UTR (NM_005275, exon 1 of 12).6	5' UTR (NM_005275, exon 1 of 12).6	352	NM_001077497	80742	Hs.118354	NM_025263	ENSG00000204576	PRR3	CAT56	proline rich 3	protein-coding
10_siC_WDR5_peak_7597	chr19	46009718	46010967	+	1089	NA	promoter-TSS (NM_003370)	promoter-TSS (NM_003370)	-395	NM_003370	7408	Hs.515469	NM_003370	ENSG00000125753	VASP	-	vasodilator stimulated phosphoprotein	protein-coding
10_siC_WDR5_peak_5812	chr17	3539508	3540264	+	1087	NA	promoter-TSS (NM_004937)	promoter-TSS (NM_004937)	124	NM_001031681	1497	Hs.187667	NM_004937	ENSG00000040531	CTNS	CTNS-LSB|PQLC4|SLC66A4	cystinosin, lysosomal cystine transporter	protein-coding
10_siC_WDR5_peak_4152	chr13	115000044	115000760	+	1087	NA	promoter-TSS (NM_001318517)	promoter-TSS (NM_001318517)	30	NM_001330101	8881	Hs.374127	NM_003903	ENSG00000130177	CDC16	ANAPC6|APC6|CDC16Hs|CUT9	cell division cycle 16	protein-coding
10_siC_WDR5_peak_15049	chr9	133296880	133297630	+	1087	NA	intron (NM_001291815, intron 75 of 86)	intron (NM_001291815, intron 75 of 86)	-22839	NM_000050	445	Hs.160786	NM_000050	ENSG00000130707	ASS1	ASS|CTLN1	argininosuccinate synthase 1	protein-coding
10_siC_WDR5_peak_12071	chr6	1872909	1873345	+	1085	NA	intron (NM_001253846, intron 7 of 10)	intron (NM_001253846, intron 7 of 10)	262977	NM_001453	2296	Hs.348883	NM_001453	ENSG00000054598	FOXC1	ARA|ASGD3|FKHL7|FREAC-3|FREAC3|IGDA|IHG1|IRID1|RIEG3	forkhead box C1	protein-coding
10_siC_WDR5_peak_8236	chr2	63277440	63278252	+	1085	NA	promoter-TSS (NR_130153)	promoter-TSS (NR_130153)	-119	NR_130153	5013	Hs.734360	NM_014562	ENSG00000115507	OTX1	-	orthodenticle homeobox 1	protein-coding
10_siC_WDR5_peak_9254	chr20	34329503	34330721	+	1084	NA	promoter-TSS (NM_184234)	promoter-TSS (NM_184234)	70	NM_001323422	9584	Hs.282901	NM_004902	ENSG00000131051	RBM39	CAPER|CAPERalpha|FSAP59|HCC1|RNPC2	RNA binding motif protein 39	protein-coding
10_siC_WDR5_peak_6740	chr17	80325656	80326142	+	1083	NA	Intergenic	LTR71B|LTR|ERV1	-6254	NM_018949	2837	Hs.192720	NM_018949	ENSG00000181408	UTS2R	GPR14|UR-2-R|UTR|UTR2	urotensin 2 receptor	protein-coding
10_siC_WDR5_peak_1223	chr1	205718639	205719952	+	1082	NA	promoter-TSS (NM_022731)	promoter-TSS (NM_022731)	15	NM_022731	64710	Hs.213061	NM_022731	ENSG00000069275	NUCKS1	JC7|NUCKS	nuclear casein kinase and cyclin dependent kinase substrate 1	protein-coding
10_siC_WDR5_peak_11807	chr5	140079639	140080286	+	1082	NA	promoter-TSS (NM_144723)	promoter-TSS (NM_144723)	-70	NM_144723	153527	Hs.350194	NM_144723	ENSG00000146007	ZMAT2	Ptg-12|Snu23	zinc finger matrin-type 2	protein-coding
10_siC_WDR5_peak_14791	chr9	95087378	95088555	+	1079	NA	promoter-TSS (NM_017948)	promoter-TSS (NM_017948)	-90	NM_001330722	55035	Hs.442199	NM_017948	ENSG00000198000	NOL8	C9orf34|NOP132|bA62C3.3|bA62C3.4	nucleolar protein 8	protein-coding
10_siC_WDR5_peak_1342	chr1	221447558	221448144	+	1079	NA	Intergenic	Intergenic	61787	NR_024236	400804	Hs.722626	NR_024236	ENSG00000234754	C1orf140	-	uncharacterized LOC400804	ncRNA
10_siC_WDR5_peak_13803	chr7	142251490	142251954	+	1079	NA	Intergenic	Intergenic	-94304	NR_162121	113839523		NR_162121		MIR11400	-	microRNA 11400	ncRNA
10_siC_WDR5_peak_7796	chr19	58144279	58144844	+	1078	NA	promoter-TSS (NR_049754)	promoter-TSS (NR_049754)	25	NM_198855	10520	Hs.590977	NM_006385	ENSG00000121417	ZNF211	C2H2-25|CH2H2-25|ZNF-25	zinc finger protein 211	protein-coding
10_siC_WDR5_peak_7780	chr19	57791153	57792281	+	1078	NA	promoter-TSS (NR_136528)	promoter-TSS (NR_136528)	-15	NR_136529	105372476	Hs.341780	NR_136528	ENSG00000267871	ZNF460-AS1	-	ZNF460 antisense RNA 1	ncRNA
10_siC_WDR5_peak_9599	chr21	46973469	46974524	+	1078	NA	intron (NM_001352511, intron 1 of 5)	C-rich|Low_complexity|Low_complexity	8943	NM_001352511	6573	Hs.84190	NM_003056	ENSG00000173638	SLC19A1	CHMD|FOLT|IFC-1|IFC1|REFC|RFC|RFC1	solute carrier family 19 member 1	protein-coding
10_siC_WDR5_peak_8159	chr2	48132685	48134411	+	1077	NA	promoter-TSS (NM_001190274)	promoter-TSS (NM_001190274)	-616	NM_001190274	80204	Hs.352677	NM_012167	ENSG00000138081	FBXO11	FBX11|IDDFBA|PRMT9|UBR6|UG063H01|VIT1	F-box protein 11	protein-coding
10_siC_WDR5_peak_7160	chr19	8070267	8070908	+	1077	NA	promoter-TSS (NM_001419)	promoter-TSS (NM_001419)	-62	NM_001419	1994	Hs.184492	NM_001419	ENSG00000066044	ELAVL1	ELAV1|HUR|Hua|MelG	ELAV like RNA binding protein 1	protein-coding
10_siC_WDR5_peak_845	chr1	153939568	153940598	+	1077	NA	promoter-TSS (NR_045658)	promoter-TSS (NR_045658)	118	NM_014437	27173	Hs.7854	NM_014437	ENSG00000143570	SLC39A1	ZIP1|ZIRTL	solute carrier family 39 member 1	protein-coding
10_siC_WDR5_peak_9242	chr20	33459919	33460749	+	1076	NA	intron (NM_178026, intron 1 of 14)	intron (NM_178026, intron 1 of 14)	325	NM_178026	2686	Hs.433738	NM_178026	ENSG00000131067	GGT7	D20S101|GGT4|GGTL3|GGTL5	gamma-glutamyltransferase 7	protein-coding
10_siC_WDR5_peak_5251	chr16	1524656	1525501	+	1076	NA	promoter-TSS (NM_001287)	promoter-TSS (NM_001287)	7	NM_001114331	1186	Hs.459649	NM_001287	ENSG00000103249	CLCN7	CLC-7|CLC7|OPTA2|OPTB4|PPP1R63	chloride voltage-gated channel 7	protein-coding
10_siC_WDR5_peak_12456	chr6	42896757	42897569	+	1074	NA	promoter-TSS (NR_134885)	promoter-TSS (NR_134885)	-55	NM_001318857	107080644	Hs.144914	NM_001318856		CNPY3-GNMT	-	CNPY3-GNMT readthrough	protein-coding
10_siC_WDR5_peak_6289	chr17	47755571	47755900	+	1074	NA	promoter-TSS (NM_001007228)	promoter-TSS (NM_001007228)	-210	NM_001007226	8405	Hs.463382	NM_003563	ENSG00000121067	SPOP	BTBD32|TEF2	speckle type BTB/POZ protein	protein-coding
10_siC_WDR5_peak_14158	chr8	61705261	61705784	+	1074	NA	intron (NM_017780, intron 3 of 37)	intron (NM_017780, intron 3 of 37)	51704	NM_001316690	55636	Hs.20395	NM_017780	ENSG00000171316	CHD7	CRG|HH5|IS3|KAL5	chromodomain helicase DNA binding protein 7	protein-coding
10_siC_WDR5_peak_6714	chr17	79633382	79634025	+	1073	NA	promoter-TSS (NR_130938)	promoter-TSS (NR_130938)	-64	NM_199287	339230	Hs.744125	NM_199287	ENSG00000185298	CCDC137	RaRF	coiled-coil domain containing 137	protein-coding
10_siC_WDR5_peak_674	chr1	110713720	110714406	+	1073	NA	intron (NM_001010898, intron 2 of 11)	intron (NM_001010898, intron 2 of 11)	20947	NM_001010898	388662	Hs.128382	NM_001010898	ENSG00000197106	SLC6A17	MRT48|NTT4	solute carrier family 6 member 17	protein-coding
10_siC_WDR5_peak_8625	chr2	153573487	153574397	+	1071	NA	promoter-TSS (NM_001365601)	promoter-TSS (NM_001365601)	33	NM_001365597	55660	Hs.643580	NM_017892	ENSG00000196504	PRPF40A	FBP-11|FBP11|FLAF1|FNBP3|HIP-10|HIP10|HYPA|NY-REN-6|Prp40	pre-mRNA processing factor 40 homolog A	protein-coding
10_siC_WDR5_peak_9188	chr20	23330843	23331688	+	1071	NA	promoter-TSS (NM_013248)	promoter-TSS (NM_013248)	-163	NM_013248	29107	Hs.516933	NM_013248	ENSG00000132661	NXT1	MTR2|P15	nuclear transport factor 2 like export factor 1	protein-coding
10_siC_WDR5_peak_928	chr1	156698018	156698921	+	1070	NA	promoter-TSS (NM_001303095)	promoter-TSS (NM_001303095)	89	NM_001370151	81875	Hs.301904	NM_030980	ENSG00000143319	ISG20L2	HSD38	interferon stimulated exonuclease gene 20 like 2	protein-coding
10_siC_WDR5_peak_1343	chr1	221483488	221483893	+	1069	NA	Intergenic	Intergenic	25948	NR_024236	400804	Hs.722626	NR_024236	ENSG00000234754	C1orf140	-	uncharacterized LOC400804	ncRNA
10_siC_WDR5_peak_5570	chr16	51973243	51973895	+	1069	NA	Intergenic	Intergenic	134278	NM_001242473	388276	Hs.534669	NM_001242473		C16orf97	-	chromosome 16 open reading frame 97	protein-coding
10_siC_WDR5_peak_11426	chr5	43313258	43314068	+	1067	NA	promoter-TSS (NM_001324223)	promoter-TSS (NM_001324223)	-149	NM_001324222	3157	Hs.397729	NM_002130	ENSG00000112972	HMGCS1	HMGCS	3-hydroxy-3-methylglutaryl-CoA synthase 1	protein-coding
10_siC_WDR5_peak_3751	chr12	124086217	124086876	+	1066	NA	promoter-TSS (NM_020936)	promoter-TSS (NM_020936)	-100	NR_135104	57696	Hs.286173	NM_020936	ENSG00000111364	DDX55	-	DEAD-box helicase 55	protein-coding
10_siC_WDR5_peak_13753	chr7	135458058	135458591	+	1065	NA	Intergenic	Intergenic	-24763	NM_001369697	389558	Hs.55200	NM_205855	ENSG00000189320	FAM180A	UNQ1940	family with sequence similarity 180 member A	protein-coding
10_siC_WDR5_peak_9003	chr2	234160018	234160616	+	1065	NA	promoter-TSS (NM_001363742)	promoter-TSS (NM_001363742)	-2	NM_001190267	55054	Hs.529322	NM_017974	ENSG00000085978	ATG16L1	APG16L|ATG16A|ATG16L|IBD10|WDR30	autophagy related 16 like 1	protein-coding
10_siC_WDR5_peak_9159	chr20	18447310	18448257	+	1063	NA	promoter-TSS (NM_006466)	promoter-TSS (NM_006466)	46	NM_001099407	55184	Hs.472225	NM_018152	ENSG00000089091	DZANK1	ANKRD64|C20orf12|C20orf84	double zinc ribbon and ankyrin repeat domains 1	protein-coding
10_siC_WDR5_peak_7079	chr19	2840927	2841939	+	1063	NA	promoter-TSS (NM_001172775)	promoter-TSS (NM_001172775)	-40	NM_152791	148254	Hs.47712	NM_152791	ENSG00000186300	ZNF555	-	zinc finger protein 555	protein-coding
10_siC_WDR5_peak_2242	chr11	8008420	8009173	+	1061	NA	promoter-TSS (NM_003754)	promoter-TSS (NM_003754)	-88	NM_003754	8665	Hs.516023	NM_003754	ENSG00000175390	EIF3F	EIF3S5|MRT67|eIF3-p47	eukaryotic translation initiation factor 3 subunit F	protein-coding
10_siC_WDR5_peak_7214	chr19	11639653	11640194	+	1060	NA	promoter-TSS (NM_001243204)	promoter-TSS (NM_001243204)	26	NM_016581	51295	Hs.515146	NM_016581	ENSG00000130159	ECSIT	SITPEC	ECSIT signalling integrator	protein-coding
10_siC_WDR5_peak_3637	chr12	112546102	112546860	+	1058	NA	intron (NM_024953, intron 1 of 23)	CpG	106	NM_024953	80018	Hs.530941	NM_024953	ENSG00000111300	NAA25	C12orf30|MDM20|NAP1	N(alpha)-acetyltransferase 25, NatB auxiliary subunit	protein-coding
10_siC_WDR5_peak_394	chr1	58879106	58879464	+	1057	NA	Intergenic	Intergenic	133113	NM_145243	115209	Hs.425769	NM_145243	ENSG00000162600	OMA1	2010001O09Rik|DAB1|MPRP-1|MPRP1|YKR087C|ZMPOMA1|peptidase	OMA1 zinc metallopeptidase	protein-coding
10_siC_WDR5_peak_6056	chr17	33446341	33447178	+	1056	NA	promoter-TSS (NR_037712)	promoter-TSS (NR_037712)	18	NM_001142571	5892	Hs.631757	NM_002878	ENSG00000185379	RAD51D	BROVCA4|R51H3|RAD51L3|TRAD	RAD51 paralog D	protein-coding
10_siC_WDR5_peak_4748	chr15	45571227	45571860	+	1055	NA	promoter-TSS (NR_120335)	promoter-TSS (NR_120335)	-123	NR_120335	101928414		NR_120335	ENSG00000259520	LOC101928414	-	uncharacterized LOC101928414	ncRNA
10_siC_WDR5_peak_4770	chr15	49170053	49170869	+	1054	NA	exon (NM_014335, exon 1 of 1)	exon (NM_014335, exon 1 of 1)	130	NM_014335	23741	Hs.255973	NM_014335	ENSG00000255302	EID1	C15orf3|CRI1|EID-1|IRO45620|PNAS-22|PTD014|RBP21	EP300 interacting inhibitor of differentiation 1	protein-coding
10_siC_WDR5_peak_14003	chr8	23836760	23837171	+	1054	NA	Intergenic	AmnSINE1|SINE|Deu	-124646	NM_003155	6781	Hs.25590	NM_003155	ENSG00000159167	STC1	STC	stanniocalcin 1	protein-coding
10_siC_WDR5_peak_5222	chr16	103425	104136	+	1054	NA	promoter-TSS (NM_016310)	promoter-TSS (NM_016310)	-48	NM_024571	79622	Hs.15277	NM_024571	ENSG00000161981	SNRNP25	C16orf33	small nuclear ribonucleoprotein U11/U12 subunit 25	protein-coding
10_siC_WDR5_peak_6006	chr17	27278139	27279599	+	1054	NA	promoter-TSS (NM_001033561)	promoter-TSS (NM_001033561)	-333	NM_001033561	57649	Hs.444173	NM_020889	ENSG00000109118	PHF12	PF1	PHD finger protein 12	protein-coding
10_siC_WDR5_peak_8660	chr2	163332183	163332671	+	1053	NA	intron (NM_173162, intron 5 of 7)	intron (NM_173162, intron 5 of 7)	131549	NM_001330270	25801	Hs.377894	NM_012198	ENSG00000115271	GCA	GCL	grancalcin	protein-coding
10_siC_WDR5_peak_5939	chr17	17494666	17495251	+	1052	NA	promoter-TSS (NM_148172)	promoter-TSS (NM_148172)	64	NM_001267551	10400	Hs.714193	NM_007169	ENSG00000133027	PEMT	PEAMT|PEMPT|PEMT2|PLMT|PNMT	phosphatidylethanolamine N-methyltransferase	protein-coding
10_siC_WDR5_peak_3084	chr12	27166840	27167398	+	1052	NA	5' UTR (NM_016551, exon 1 of 12)	5' UTR (NM_016551, exon 1 of 12)	198	NM_016551	51768	Hs.438641	NM_016551	ENSG00000064115	TM7SF3	-	transmembrane 7 superfamily member 3	protein-coding
10_siC_WDR5_peak_7916	chr2	10952383	10953193	+	1050	NA	intron (NM_001282707, intron 1 of 13)	CpG	123	NM_005742	10130	Hs.212102	NM_005742	ENSG00000143870	PDIA6	ERP5|P5|TXNDC7	protein disulfide isomerase family A member 6	protein-coding
10_siC_WDR5_peak_9917	chr3	3220978	3221751	+	1049	NA	promoter-TSS (NM_016302)	promoter-TSS (NM_016302)	37	NM_001173482	51185	Hs.18925	NM_016302	ENSG00000113851	CRBN	MRT2|MRT2A	cereblon	protein-coding
10_siC_WDR5_peak_14609	chr9	33024245	33025786	+	1048	NA	promoter-TSS (NM_001539)	promoter-TSS (NM_001539)	103	NM_001369001	54840	Hs.20158	NM_017692	ENSG00000137074	APTX	AOA|AOA1|AXA1|EAOH|EOAHA|FHA-HIT	aprataxin	protein-coding
10_siC_WDR5_peak_8816	chr2	200819966	200820925	+	1048	NA	promoter-TSS (NM_001039693)	promoter-TSS (NM_001039693)	-231	NR_109906	129450	Hs.204619	NM_152382	ENSG00000162971	TYW5	C2orf60|hTYW5	tRNA-yW synthesizing protein 5	protein-coding
10_siC_WDR5_peak_6449	chr17	59489930	59490843	+	1048	NA	non-coding (NR_160788, exon 1 of 1)	non-coding (NR_160788, exon 1 of 1)	1274	NR_160788	388407	Hs.434459	NM_203425		C17orf82	-	chromosome 17 open reading frame 82	ncRNA
10_siC_WDR5_peak_13943	chr8	11141662	11142520	+	1047	NA	promoter-TSS (NM_015458)	promoter-TSS (NM_015458)	-234	NM_015458	66036	Hs.591395	NM_015458	ENSG00000104643	MTMR9	C8orf9|LIP-STYX|MTMR8	myotubularin related protein 9	protein-coding
10_siC_WDR5_peak_10392	chr3	121468124	121469056	+	1046	NA	promoter-TSS (NM_001366284)	promoter-TSS (NM_001366284)	-2	NM_001366284	2804	Hs.213389	NM_004487	ENSG00000173230	GOLGB1	GCP|GCP372|GOLIM1	golgin B1	protein-coding
10_siC_WDR5_peak_9886	chr22	47157984	47158952	+	1046	NA	promoter-TSS (NM_001284303)	promoter-TSS (NM_001284303)	-46	NM_001284303	25771	Hs.435044	NM_014346	ENSG00000054611	TBC1D22A	C22orf4|HSC79E021	TBC1 domain family member 22A	protein-coding
10_siC_WDR5_peak_7582	chr19	45147195	45148103	+	1046	NA	intron (NM_006505, intron 1 of 7)	CpG	439	NM_001135768	5817	Hs.171844	NM_006505	ENSG00000073008	PVR	CD155|HVED|NECL5|Necl-5|PVS|TAGE4	PVR cell adhesion molecule	protein-coding
10_siC_WDR5_peak_8239	chr2	64067717	64069070	+	1044	NA	promoter-TSS (NM_006759)	promoter-TSS (NM_006759)	295	NM_001001521	7360	Hs.516217	NM_006759	ENSG00000169764	UGP2	UDPG|UDPGP|UDPGP2|UGP1|UGPP1|UGPP2|pHC379	UDP-glucose pyrophosphorylase 2	protein-coding
10_siC_WDR5_peak_3716	chr12	121789881	121790642	+	1044	NA	promoter-TSS (NM_001330489)	promoter-TSS (NM_001330489)	-47	NM_016237	51433	Hs.7101	NM_016237	ENSG00000089053	ANAPC5	APC5	anaphase promoting complex subunit 5	protein-coding
10_siC_WDR5_peak_4291	chr14	52455983	52456625	+	1044	NA	promoter-TSS (NM_016039)	promoter-TSS (NM_016039)	40	NM_016039	51637	Hs.534457	NM_016039	ENSG00000087302	RTRAF	C14orf166|CGI-99|CGI99|CLE|CLE7|LCRP369|RLLM1|hCLE|hCLE1	RNA transcription, translation and transport factor	protein-coding
10_siC_WDR5_peak_9468	chr20	62289344	62290118	+	1043	NA	non-coding (NR_037882, exon 1 of 38)	non-coding (NR_037882, exon 1 of 38)	568	NM_032957	51750	Hs.745057	NM_016434	ENSG00000258366	RTEL1	C20orf41|DKCA4|DKCB5|NHL|PFBMFT3|RTEL	regulator of telomere elongation helicase 1	protein-coding
10_siC_WDR5_peak_6723	chr17	79848940	79850111	+	1043	NA	promoter-TSS (NR_158770)	promoter-TSS (NR_158770)	-62	NR_158770	10189	Hs.534385	NM_005782	ENSG00000183684	ALYREF	ALY|ALY/REF|BEF|REF|THOC4	Aly/REF export factor	protein-coding
10_siC_WDR5_peak_9232	chr20	32398805	32399309	+	1042	NA	promoter-TSS (NR_110623)	promoter-TSS (NR_110623)	-97	NM_176812	128866	Hs.472471	NM_176812	ENSG00000101421	CHMP4B	C20orf178|CHMP4A|CTPP3|CTRCT31|SNF7|SNF7-2|Shax1|VPS32B|Vps32-2|dJ553F4.4	charged multivesicular body protein 4B	protein-coding
10_siC_WDR5_peak_12462	chr6	43139029	43139727	+	1042	NA	promoter-TSS (NM_001292001)	promoter-TSS (NM_001292001)	371	NM_003131	6722	Hs.520140	NM_003131	ENSG00000112658	SRF	MCM1	serum response factor	protein-coding
10_siC_WDR5_peak_12133	chr6	10694476	10695349	+	1041	NA	promoter-TSS (NR_026737)	promoter-TSS (NR_026737)	-63	NR_026737	347744	Hs.61389	NM_001145020	ENSG00000137434	C6orf52	-	chromosome 6 open reading frame 52	protein-coding
10_siC_WDR5_peak_6459	chr17	60555483	60557071	+	1041	NA	promoter-TSS (NM_001330418)	promoter-TSS (NM_001330418)	-202	NM_001284333	11011	Hs.445078	NM_006852	ENSG00000146872	TLK2	HsHPK|MRD57|PKU-ALPHA	tousled like kinase 2	protein-coding
10_siC_WDR5_peak_6186	chr17	42101524	42102017	+	1040	NA	Intergenic	Intergenic	-1251	NM_001304813	84336	Hs.514211	NM_032376	ENSG00000091947	TMEM101	-	transmembrane protein 101	protein-coding
10_siC_WDR5_peak_14291	chr8	95565319	95566091	+	1040	NA	promoter-TSS (NM_015496)	promoter-TSS (NM_015496)	-8	NM_015496	25962	Hs.202238	NM_015496	ENSG00000164944	VIRMA	KIAA1429|MSTP054|fSAP121	vir like m6A methyltransferase associated	protein-coding
10_siC_WDR5_peak_14915	chr9	115480101	115480628	+	1040	NA	promoter-TSS (NM_021218)	promoter-TSS (NM_021218)	33	NM_001329585	58493	Hs.658575	NM_021218	ENSG00000148153	INIP	C9orf80|HSPC043|MISE|SOSSC|SSBIP1|hSSBIP1	INTS3 and NABP interacting protein	protein-coding
10_siC_WDR5_peak_7785	chr19	57922236	57922769	+	1038	NA	promoter-TSS (NM_001330617)	promoter-TSS (NM_001330617)	-13	NM_001330617	7565	Hs.729403	NM_006959	ENSG00000186272	ZNF17	HPF3|KOX10	zinc finger protein 17	protein-coding
10_siC_WDR5_peak_664	chr1	109940115	109940990	+	1038	NA	promoter-TSS (NM_002959)	promoter-TSS (NM_002959)	-12	NM_002959	6272	Hs.485195	NM_002959	ENSG00000134243	SORT1	Gp95|LDLCQ6|NT3|NTR3	sortilin 1	protein-coding
10_siC_WDR5_peak_10760	chr4	1722635	1723444	+	1037	NA	promoter-TSS (NM_138385)	promoter-TSS (NM_138385)	11	NM_001127266	92305	Hs.518562	NM_138385	ENSG00000168936	TMEM129	D4S2561E	transmembrane protein 129	protein-coding
10_siC_WDR5_peak_10329	chr3	101280393	101281016	+	1035	NA	promoter-TSS (NM_017819)	promoter-TSS (NM_017819)	-8	NM_017819	54931	Hs.594839	NM_017819	ENSG00000174173	TRMT10C	COXPD30|HNYA|MRPP1|RG9MTD1	tRNA methyltransferase 10C, mitochondrial RNase P subunit	protein-coding
10_siC_WDR5_peak_5880	chr17	8059636	8060340	+	1034	NA	Intergenic	CpG	-4266	NM_002616	5187	Hs.445534	NM_002616	ENSG00000179094	PER1	PER|RIGUI|hPER	period circadian regulator 1	protein-coding
10_siC_WDR5_peak_2953	chr12	2921513	2922403	+	1034	NA	non-coding (NR_147202, exon 1 of 16)	non-coding (NR_147202, exon 1 of 16)	124	NR_147202	55846	Hs.239	NM_018463	ENSG00000111203	ITFG2	FGGAP1|MDS028	integrin alpha FG-GAP repeat containing 2	protein-coding
10_siC_WDR5_peak_7695	chr19	51161169	51161908	+	1034	NA	TTS (NM_016148)	TTS (NM_016148)	8836	NM_001195076	342918	Hs.531650	NM_001195076	ENSG00000235034	C19orf81	-	chromosome 19 open reading frame 81	protein-coding
10_siC_WDR5_peak_13991	chr8	22461755	22462535	+	1034	NA	promoter-TSS (NM_001363069)	promoter-TSS (NM_001363069)	-125	NM_001363069	57805	Hs.744848	NM_021174	ENSG00000158941	CCAR2	DBC-1|DBC1|KIAA1967|NET35|p30 DBC|p30DBC	cell cycle and apoptosis regulator 2	protein-coding
10_siC_WDR5_peak_7039	chr19	1205321	1206025	+	1031	NA	promoter-TSS (NM_000455)	promoter-TSS (NM_000455)	-125	NM_000455	6794	Hs.515005	NM_000455	ENSG00000118046	STK11	LKB1|PJS|hLKB1	serine/threonine kinase 11	protein-coding
10_siC_WDR5_peak_6424	chr17	57408671	57409604	+	1031	NA	5' UTR (NM_001005404, exon 1 of 5)	5' UTR (NM_001005404, exon 1 of 5)	121	NM_001005404	388403	Hs.463613	NM_001005404	ENSG00000175155	YPEL2	FKSG4	yippee like 2	protein-coding
10_siC_WDR5_peak_2422	chr11	46450574	46450993	+	1031	NA	intron (NM_001267782, intron 16 of 19)	intron (NM_001267782, intron 16 of 19)	-22574	NR_036118	100422825		NR_036118	ENSG00000283497	MIR3160-2	mir-3160-2	microRNA 3160-2	ncRNA
10_siC_WDR5_peak_7945	chr2	20251049	20252024	+	1031	NA	promoter-TSS (NM_014713)	promoter-TSS (NM_014713)	-147	NM_014713	9741	Hs.467807	NM_014713	ENSG00000068697	LAPTM4A	HUMORF13|LAPTM4|MBNT|Mtrp	lysosomal protein transmembrane 4 alpha	protein-coding
10_siC_WDR5_peak_10782	chr4	4543472	4544058	+	1031	NA	promoter-TSS (NM_001346281)	promoter-TSS (NM_001346281)	10	NR_144414	53407	Hs.584913	NM_016930	ENSG00000168818	STX18	Ufe1	syntaxin 18	protein-coding
10_siC_WDR5_peak_948	chr1	160001537	160002124	+	1029	NA	promoter-TSS (NM_145167)	promoter-TSS (NM_145167)	-50	NM_145167	93183	Hs.552810	NM_145167	ENSG00000143315	PIGM	GPI-MT-I	phosphatidylinositol glycan anchor biosynthesis class M	protein-coding
10_siC_WDR5_peak_8931	chr2	219260697	219261528	+	1026	NA	3' UTR (NM_000578, exon 15 of 15)	3' UTR (NM_000578, exon 15 of 15)	-1844	NM_001206878	58190	Hs.444468	NM_021198	ENSG00000144579	CTDSP1	NIF3|NLI-IF|NLIIF|SCP1	CTD small phosphatase 1	protein-coding
10_siC_WDR5_peak_2980	chr12	6832861	6833960	+	1025	NA	promoter-TSS (NM_001164093)	promoter-TSS (NM_001164093)	-43	NM_001164093	50813	Hs.530823	NM_016319	ENSG00000111652	COPS7A	CSN7|CSN7A|SGN7a	COP9 signalosome subunit 7A	protein-coding
10_siC_WDR5_peak_3282	chr12	56211257	56212387	+	1023	NA	promoter-TSS (NM_033082)	promoter-TSS (NM_033082)	-3	NM_014182	29095	Hs.534450	NM_014182	ENSG00000123353	ORMDL2	HSPC160|MST095|MSTP095|adoplin-2	ORMDL sphingolipid biosynthesis regulator 2	protein-coding
10_siC_WDR5_peak_8808	chr2	198939733	198940116	+	1023	NA	intron (NM_006226, intron 1 of 5)	LFSINE_Vert|SINE|SINE	270607	NM_006226	5334	Hs.153322	NM_006226	ENSG00000115896	PLCL1	PLCE|PLCL|PLDL1|PPP1R127|PRIP	phospholipase C like 1 (inactive)	protein-coding
10_siC_WDR5_peak_3146	chr12	42297829	42298292	+	1023	NA	Intergenic	Intergenic	140069	NR_135040	101927038	Hs.98588	NR_135040	ENSG00000257784	LINC02400	-	long intergenic non-protein coding RNA 2400	ncRNA
10_siC_WDR5_peak_3741	chr12	123716656	123717910	+	1023	NA	promoter-TSS (NM_152269)	promoter-TSS (NM_152269)	405	NR_103517	10198	Hs.577404	NM_022782	ENSG00000051825	MPHOSPH9	MPP-9|MPP9	M-phase phosphoprotein 9	protein-coding
10_siC_WDR5_peak_3132	chr12	38710332	38710832	+	1022	NA	promoter-TSS (NM_001308340)	promoter-TSS (NM_001308340)	6	NM_001013620	144245	Hs.259305	NM_001013620	ENSG00000175548	ALG10B	ALG10|KCR1	ALG10 alpha-1,2-glucosyltransferase B	protein-coding
10_siC_WDR5_peak_5946	chr17	17942278	17942932	+	1021	NA	promoter-TSS (NM_145691)	promoter-TSS (NM_145691)	-117	NM_024052	79018	Hs.187422	NM_024052	ENSG00000141034	GID4	C17orf39|VID2|VID24	GID complex subunit 4 homolog	protein-coding
10_siC_WDR5_peak_3278	chr12	56109435	56110223	+	1020	NA	promoter-TSS (NR_037657)	promoter-TSS (NR_037657)	11	NR_037655	2647	Hs.94672	NM_001487	ENSG00000135441	BLOC1S1	BLOS1|BORCS1|GCN5L1|MICoA|RT14	biogenesis of lysosomal organelles complex 1 subunit 1	protein-coding
10_siC_WDR5_peak_3248	chr12	53715007	53715581	+	1020	NA	promoter-TSS (NM_001173466)	promoter-TSS (NM_001173466)	100	NM_015665	8086	Hs.369144	NM_015665	ENSG00000094914	AAAS	AAA|AAASb|ADRACALA|ADRACALIN|ALADIN|GL003	aladin WD repeat nucleoporin	protein-coding
10_siC_WDR5_peak_4750	chr15	45694215	45695051	+	1019	NA	promoter-TSS (NR_136648)	promoter-TSS (NR_136648)	99	NR_136647	79029	Hs.369657	NM_024063	ENSG00000171763	SPATA5L1	-	spermatogenesis associated 5 like 1	protein-coding
10_siC_WDR5_peak_14354	chr8	110345916	110346828	+	1019	NA	promoter-TSS (NM_020189)	promoter-TSS (NM_020189)	-56	NM_032869	84955	Hs.380291	NM_032869	ENSG00000120526	NUDCD1	CML66|OVA66	NudC domain containing 1	protein-coding
10_siC_WDR5_peak_5194	chr15	99791020	99791815	+	1019	NA	promoter-TSS (NM_001321678)	promoter-TSS (NM_001321678)	13	NM_001288616	64927	Hs.513195	NM_022905	ENSG00000103852	TTC23	HCC-8	tetratricopeptide repeat domain 23	protein-coding
10_siC_WDR5_peak_14107	chr8	41400335	41400993	+	1018	NA	3' UTR (NM_032336, exon 8 of 8)	3' UTR (NM_032336, exon 8 of 8)	13884	NM_032336	84296	Hs.656996	NM_032336	ENSG00000147536	GINS4	SLD5	GINS complex subunit 4	protein-coding
10_siC_WDR5_peak_4614	chr14	105957124	105957837	+	1018	NA	promoter-TSS (NM_001367178)	promoter-TSS (NM_001367178)	-103	NM_001367178	283643	Hs.720306	NM_173608	ENSG00000185347	TEDC1	C14orf80	tubulin epsilon and delta complex 1	protein-coding
10_siC_WDR5_peak_10565	chr3	158362136	158362631	+	1017	NA	promoter-TSS (NM_024996)	promoter-TSS (NM_024996)	66	NM_024996	85476	Hs.518355	NM_024996	ENSG00000168827	GFM1	COXPD1|EFG|EFG1|EFGM|EGF1|GFM|hEFG1|mtEF-G1	G elongation factor mitochondrial 1	protein-coding
10_siC_WDR5_peak_7664	chr19	49496426	49497256	+	1016	NA	promoter-TSS (NM_002103)	promoter-TSS (NM_002103)	136	NM_001321191	10856	Hs.515846	NM_006666	ENSG00000183207	RUVBL2	CGI-46|ECP-51|ECP51|INO80J|REPTIN|RVB2|TAP54-beta|TIH2|TIP48|TIP49B	RuvB like AAA ATPase 2	protein-coding
10_siC_WDR5_peak_10780	chr4	4249663	4250429	+	1016	NA	promoter-TSS (NM_001297551)	promoter-TSS (NM_001297551)	-77	NM_032927	85013	Hs.12845	NM_032927	ENSG00000132406	TMEM128	-	transmembrane protein 128	protein-coding
10_siC_WDR5_peak_7501	chr19	39881488	39882240	+	1016	NA	promoter-TSS (NR_133915)	promoter-TSS (NR_133915)	-118	NM_019088	54623	Hs.466714	NM_019088	ENSG00000006712	PAF1	F23149_1|PD2	PAF1 homolog, Paf1/RNA polymerase II complex component	protein-coding
10_siC_WDR5_peak_4437	chr14	75642994	75643674	+	1016	NA	promoter-TSS (NM_006827)	promoter-TSS (NM_006827)	-19	NM_006827	10972	Hs.74137	NM_006827	ENSG00000170348	TMED10	P24(DELTA)|S31I125|S31III125|TMP21|Tmp-21-I|p23|p24d1	transmembrane p24 trafficking protein 10	protein-coding
10_siC_WDR5_peak_7787	chr19	57988641	57989249	+	1015	NA	promoter-TSS (NM_001330613)	promoter-TSS (NM_001330613)	-11	NM_001330613	400720	Hs.388810	NM_001024596	ENSG00000197128	ZNF772	-	zinc finger protein 772	protein-coding
10_siC_WDR5_peak_8216	chr2	61244104	61245448	+	1014	NA	promoter-TSS (NM_002618)	promoter-TSS (NM_002618)	-79	NM_002618	5194	Hs.161377	NM_002618	ENSG00000162928	PEX13	NALD|PBD11A|PBD11B|ZWS	peroxisomal biogenesis factor 13	protein-coding
10_siC_WDR5_peak_427	chr1	61543500	61543988	+	1013	NA	intron (NM_001145511, intron 1 of 10)	intron (NM_001145511, intron 1 of 10)	845	NM_001145511	4774	Hs.740757	NM_005595	ENSG00000162599	NFIA	BRMUTD|CTF|NF-I/A|NF1-A|NFI-A|NFI-L	nuclear factor I A	protein-coding
10_siC_WDR5_peak_9801	chr22	39915251	39917004	+	1013	NA	promoter-TSS (NM_001675)	promoter-TSS (NM_001675)	-437	NM_001675	468	Hs.496487	NM_001675	ENSG00000128272	ATF4	CREB-2|CREB2|TAXREB67|TXREB	activating transcription factor 4	protein-coding
10_siC_WDR5_peak_10134	chr3	48481236	48481899	+	1012	NA	promoter-TSS (NM_001256969)	promoter-TSS (NM_001256969)	-38	NM_024661	79714	Hs.187657	NM_024661	ENSG00000164051	CCDC51	-	coiled-coil domain containing 51	protein-coding
10_siC_WDR5_peak_8932	chr2	219264239	219264756	+	1011	NA	promoter-TSS (NM_182642)	promoter-TSS (NM_182642)	-94	NM_182642	58190	Hs.444468	NM_021198	ENSG00000144579	CTDSP1	NIF3|NLI-IF|NLIIF|SCP1	CTD small phosphatase 1	protein-coding
10_siC_WDR5_peak_4428	chr14	75179561	75180059	+	1011	NA	promoter-TSS (NM_001318508)	promoter-TSS (NM_001318508)	-27	NM_001039479	9870	Hs.497417	NM_014821	ENSG00000119682	AREL1	FIEL1|KIAA0317	apoptosis resistant E3 ubiquitin protein ligase 1	protein-coding
10_siC_WDR5_peak_9509	chr21	30396803	30397523	+	1010	NA	intron (NM_001001992, intron 1 of 17)	CpG	174	NM_006447	10600	Hs.99819	NM_006447	ENSG00000156256	USP16	UBP-M|UBPM	ubiquitin specific peptidase 16	protein-coding
10_siC_WDR5_peak_12546	chr6	70294884	70295604	+	1010	NA	Intergenic	Intergenic	211114	NM_001363722	55788	Hs.271643	NM_018368	ENSG00000168216	LMBRD1	C6orf209|LMBD1|MAHCF|NESI	LMBR1 domain containing 1	protein-coding
10_siC_WDR5_peak_10617	chr3	179280445	179281175	+	1008	NA	promoter-TSS (NM_004301)	promoter-TSS (NM_004301)	96	NM_004301	86	Hs.435326	NM_004301	ENSG00000136518	ACTL6A	ACTL6|ARPN-BETA|Arp4|BAF53A|INO80K	actin like 6A	protein-coding
10_siC_WDR5_peak_15124	chr9	139743274	139744066	+	1008	NA	non-coding (NR_109807, exon 1 of 3)	non-coding (NR_109807, exon 1 of 3)	402	NM_001135861	29085	Hs.409834	NM_014172	ENSG00000054148	PHPT1	CGI-202|HEL-S-132P|HSPC141|PHP|PHP14	phosphohistidine phosphatase 1	protein-coding
10_siC_WDR5_peak_6103	chr17	38136904	38137570	+	1008	NA	exon (NM_002809, exon 1 of 12)	exon (NM_002809, exon 1 of 12)	177	NM_002809	5709	Hs.12970	NM_002809	ENSG00000108344	PSMD3	P58|RPN3|S3|TSTA2	proteasome 26S subunit, non-ATPase 3	protein-coding
10_siC_WDR5_peak_6411	chr17	56429186	56430056	+	1007	NA	promoter-TSS (NR_073470)	promoter-TSS (NR_073470)	-59	NR_073470	6827	Hs.439481	NM_003168	ENSG00000213246	SUPT4H1	SPT4|SPT4H|SUPT4H|Supt4a	SPT4 homolog, DSIF elongation factor subunit	protein-coding
10_siC_WDR5_peak_9498	chr21	27926776	27927161	+	1006	NA	intron (NR_135515, intron 3 of 3)	intron (NR_135515, intron 3 of 3)	18637	NR_135472	116159	Hs.37445	NM_052954	ENSG00000166265	CYYR1	C21orf95	cysteine and tyrosine rich 1	protein-coding
10_siC_WDR5_peak_14978	chr9	128003236	128004342	+	1005	NA	promoter-TSS (NM_005347)	promoter-TSS (NM_005347)	-167	NM_005347	3309	Hs.743241	NM_005347	ENSG00000044574	HSPA5	BIP|GRP78|HEL-S-89n|MIF2	heat shock protein family A (Hsp70) member 5	protein-coding
10_siC_WDR5_peak_15173	chrX	18693126	18693610	+	1005	NA	Intergenic	CpG	-3145	NM_000330	6247	Hs.715725	NM_000330	ENSG00000102104	RS1	RS|XLRS1	retinoschisin 1	protein-coding
10_siC_WDR5_peak_5410	chr16	21530788	21532162	+	1005	NA	non-coding (NR_002594, exon 1 of 1)	non-coding (NR_002594, exon 1 of 1)	290	NR_002594	387254	Hs.448808	NR_002594		SLC7A5P2	IMAA|MMAA	solute carrier family 7 member 5 pseudogene 2	pseudo
10_siC_WDR5_peak_2205	chr11	560613	561146	+	1005	NA	promoter-TSS (NM_003475)	promoter-TSS (NM_003475)	-91	NM_001143994	8045	Hs.72925	NM_003475	ENSG00000099849	RASSF7	C11orf13|HRAS1|HRC1	Ras association domain family member 7	protein-coding
10_siC_WDR5_peak_7371	chr19	21579674	21580162	+	1003	NA	promoter-TSS (NM_145326)	promoter-TSS (NM_145326)	-17	NM_145326	284443	Hs.656558	NM_145326	ENSG00000196268	ZNF493	-	zinc finger protein 493	protein-coding
10_siC_WDR5_peak_13018	chr7	1177555	1178213	+	1003	NA	promoter-TSS (NM_001350970)	promoter-TSS (NM_001350970)	-1	NM_001318252	84310	Hs.653258	NM_032350	ENSG00000146540	C7orf50	YCR016W	chromosome 7 open reading frame 50	protein-coding
10_siC_WDR5_peak_6777	chr18	5237480	5238538	+	1002	NA	promoter-TSS (NR_026849)	promoter-TSS (NR_026849)	19	NR_026849	147525	Hs.657197	NM_152471		LINC00526	C18orf18|HsT959	long intergenic non-protein coding RNA 526	ncRNA
10_siC_WDR5_peak_1584	chr10	12237611	12238659	+	1002	NA	promoter-TSS (NM_001321647)	promoter-TSS (NM_001321647)	8	NM_001321647	11164	Hs.555956	NM_014142	ENSG00000165609	NUDT5	YSA1|YSA1H|YSAH1|hNUDT5	nudix hydrolase 5	protein-coding
10_siC_WDR5_peak_5239	chr16	740195	740662	+	1000	NA	promoter-TSS (NM_032259)	promoter-TSS (NM_032259)	-30	NM_032259	84219	Hs.459632	NM_032259	ENSG00000127580	WDR24	C16orf21|JFP7	WD repeat domain 24	protein-coding
10_siC_WDR5_peak_6160	chr17	41276522	41277858	+	1000	NA	promoter-TSS (NR_003108)	promoter-TSS (NR_003108)	191	NM_007300	672	Hs.194143	NM_007294	ENSG00000012048	BRCA1	BRCAI|BRCC1|BROVCA1|FANCS|IRIS|PNCA4|PPP1R53|PSCP|RNF53	BRCA1 DNA repair associated	protein-coding
10_siC_WDR5_peak_13431	chr7	72935774	72937117	+	999	NA	5' UTR (NM_032408, exon 1 of 20)	5' UTR (NM_032408, exon 1 of 20)	178	NM_032408	9031	Hs.743372	NM_023005	ENSG00000009954	BAZ1B	WBSCR10|WBSCR9|WSTF	bromodomain adjacent to zinc finger domain 1B	protein-coding
10_siC_WDR5_peak_1511	chr1	244137695	244138567	+	998	NA	intron (NR_033883, intron 1 of 11)	intron (NR_033883, intron 1 of 11)	57427	NR_033883	339529	Hs.209374	NR_033883	ENSG00000226828	LINC02774	-	long intergenic non-protein coding RNA 2774	ncRNA
10_siC_WDR5_peak_7783	chr19	57874504	57875143	+	998	NA	promoter-TSS (NM_001355204)	promoter-TSS (NM_001355204)	20	NM_173631	284306	Hs.446620	NM_173631	ENSG00000152433	ZNF547	MIP-2A|SEDLP1|TRAPPC2.19|TRAPPC2B|TRAPPC2P1	zinc finger protein 547	protein-coding
10_siC_WDR5_peak_9137	chr20	10415643	10416178	+	997	NA	promoter-TSS (NM_001009608)	promoter-TSS (NM_001009608)	-43	NM_001009608	128710	Hs.668782	NM_001009608	ENSG00000149346	SLX4IP	C20orf94|bA204H22.1|bA254M13.1|dJ1099D15.3	SLX4 interacting protein	protein-coding
10_siC_WDR5_peak_9777	chr22	38082188	38082718	+	996	NA	exon (NM_024313, exon 1 of 6)	exon (NM_024313, exon 1 of 6)	103	NM_024313	79159	Hs.632778	NM_024313	ENSG00000273899	NOL12	Nop25|dJ37E16.7	nucleolar protein 12	protein-coding
10_siC_WDR5_peak_1227	chr1	206589562	206590272	+	995	NA	intron (NM_001170637, intron 8 of 19)	intron (NM_001170637, intron 8 of 19)	32550	NR_120535	100996712	Hs.497575	NM_001271887		SRGAP2D	-	SLIT-ROBO Rho GTPase activating protein 2D (pseudogene)	pseudo
10_siC_WDR5_peak_6133	chr17	40306740	40307318	+	995	NA	promoter-TSS (NM_001252039)	promoter-TSS (NM_001252039)	-22	NM_001252039	5878	Hs.650382	NM_004583	ENSG00000108774	RAB5C	L1880|RAB5CL|RAB5L|RABL	RAB5C, member RAS oncogene family	protein-coding
10_siC_WDR5_peak_1048	chr1	173683820	173684559	+	995	NA	promoter-TSS (NM_014458)	promoter-TSS (NM_014458)	69	NM_014458	27252	Hs.495035	NM_014458	ENSG00000076321	KLHL20	KHLHX|KLEIP|KLHLX	kelch like family member 20	protein-coding
10_siC_WDR5_peak_2378	chr11	36262158	36262743	+	994	NA	Intergenic	Intergenic	48524	NM_001307932	29099	Hs.99443	NM_014186	ENSG00000110442	COMMD9	C11orf55|HSPC166|LINC00610	COMM domain containing 9	protein-coding
10_siC_WDR5_peak_3691	chr12	119740133	119740873	+	994	NA	intron (NR_024246, intron 1 of 3)	intron (NR_024246, intron 1 of 3)	682	NR_024246	144742	Hs.524782	NR_024246	ENSG00000281196	LINC00934	-	long intergenic non-protein coding RNA 934	ncRNA
10_siC_WDR5_peak_9348	chr20	46337629	46338087	+	992	NA	intron (NM_198596, intron 3 of 20)	intron (NM_198596, intron 3 of 20)	76950	NM_018837	55959	Hs.162016	NM_018837	ENSG00000196562	SULF2	HSULF-2	sulfatase 2	protein-coding
10_siC_WDR5_peak_5532	chr16	31470010	31471098	+	991	NA	5' UTR (NM_001105247, exon 1 of 6)	5' UTR (NM_001105247, exon 1 of 6)	237	NM_024742	79798	Hs.732945	NM_024742	ENSG00000140691	ARMC5	AIMAH2	armadillo repeat containing 5	protein-coding
10_siC_WDR5_peak_3284	chr12	56320447	56321385	+	991	NA	promoter-TSS (NM_001143853)	promoter-TSS (NM_001143853)	-7	NM_001143853	84305	Hs.505687	NM_032345	ENSG00000170473	PYM1	PYM|WIBG	PYM homolog 1, exon junction complex associated factor	protein-coding
10_siC_WDR5_peak_6734	chr17	80055326	80057417	+	991	NA	promoter-TSS (NM_004104)	promoter-TSS (NM_004104)	-259	NM_004104	2194	Hs.83190	NM_004104	ENSG00000169710	FASN	FAS|OA-519|SDR27X1	fatty acid synthase	protein-coding
10_siC_WDR5_peak_6084	chr17	36908342	36909261	+	991	NA	promoter-TSS (NR_104194)	promoter-TSS (NR_104194)	-193	NM_002795	5691	Hs.82793	NM_002795	ENSG00000277791	PSMB3	HC10-II	proteasome subunit beta 3	protein-coding
10_siC_WDR5_peak_9789	chr22	39077683	39078335	+	991	NA	promoter-TSS (NM_020243)	promoter-TSS (NM_020243)	47	NM_020243	56993	Hs.595072	NM_020243	ENSG00000100216	TOMM22	1C9-2|MST065|MSTP065|TOM22	translocase of outer mitochondrial membrane 22	protein-coding
10_siC_WDR5_peak_843	chr1	153930841	153931367	+	989	NA	promoter-TSS (NM_181715)	promoter-TSS (NM_181715)	-16	NM_181715	200186	Hs.406392	NM_181715	ENSG00000160741	CRTC2	TORC-2|TORC2	CREB regulated transcription coactivator 2	protein-coding
10_siC_WDR5_peak_5191	chr15	99395406	99396094	+	989	NA	intron (NM_000875, intron 2 of 20)	CpG	68095	NR_039864	100616432		NR_039864	ENSG00000264480	MIR4714	-	microRNA 4714	ncRNA
10_siC_WDR5_peak_12590	chr6	84936824	84937847	+	989	NA	promoter-TSS (NM_014895)	promoter-TSS (NM_014895)	26	NM_014895	22832	Hs.485865	NM_014895	ENSG00000135315	CEP162	C6orf84|KIAA1009|QN1	centrosomal protein 162	protein-coding
10_siC_WDR5_peak_5992	chr17	26684313	26685031	+	989	NA	promoter-TSS (NM_015584)	promoter-TSS (NM_015584)	2	NM_152464	147007	Hs.594696	NM_152464	ENSG00000244045	TMEM199	C17orf32|CDG2P|VMA12|VPH2	transmembrane protein 199	protein-coding
10_siC_WDR5_peak_13450	chr7	75039336	75040122	+	988	NA	non-coding (NR_033322, exon 1 of 11)	non-coding (NR_033322, exon 1 of 11)	124	NR_104013	155400	Hs.436034	NM_001039575	ENSG00000223705	NSUN5P1	NSUN5B|WBSCR20B	NSUN5 pseudogene 1	pseudo
10_siC_WDR5_peak_13407	chr7	69995109	69995661	+	988	NA	intron (NM_015570, intron 5 of 18)	intron (NM_015570, intron 5 of 18)	-601745	NM_022479	64409	Hs.488591	NM_022479	ENSG00000185274	GALNT17	GALNACT17|GALNT16|GALNT20|GALNTL3|GalNAc-T17|GalNAc-T19|GalNAc-T5L|WBSCR17	polypeptide N-acetylgalactosaminyltransferase 17	protein-coding
10_siC_WDR5_peak_3599	chr12	110010866	110011863	+	987	NA	promoter-TSS (NR_038118)	promoter-TSS (NR_038118)	-55	NR_038118	326625	Hs.12106	NM_052845	ENSG00000139428	MMAB	ATR|CFAP23|cblB|cob	metabolism of cobalamin associated B	protein-coding
10_siC_WDR5_peak_9051	chr2	242041514	242042088	+	986	NA	promoter-TSS (NR_138463)	promoter-TSS (NR_138463)	-54	NR_138464	130916	Hs.159556	NM_182501	ENSG00000122085	MTERF4	MTERFD2	mitochondrial transcription termination factor 4	protein-coding
10_siC_WDR5_peak_6262	chr17	46080371	46081604	+	984	NA	Intergenic	Intergenic	-29261	NR_162100	113218499		NR_162100		MIR10226	-	microRNA 10226	ncRNA
10_siC_WDR5_peak_1895	chr10	85898996	85899553	+	984	NA	promoter-TSS (NM_014394)	promoter-TSS (NM_014394)	9	NM_014394	27069	Hs.352656	NM_014394	ENSG00000165678	GHITM	DERP2|HSPC282|MICS1|My021|PTD010|TMBIM5	growth hormone inducible transmembrane protein	protein-coding
10_siC_WDR5_peak_3245	chr12	53645497	53646244	+	984	NA	promoter-TSS (NM_032889)	promoter-TSS (NM_032889)	-9	NM_032889	84975	Hs.654660	NM_032889	ENSG00000182544	MFSD5	hsMOT2	major facilitator superfamily domain containing 5	protein-coding
10_siC_WDR5_peak_12332	chr6	31926475	31927153	+	983	NA	promoter-TSS (NM_002904).4	promoter-TSS (NM_002904).4	-66	NM_002904	7936	Hs.423935	NM_002904	ENSG00000204356	NELFE	D6S45|NELF-E|RD|RDBP|RDP	negative elongation factor complex member E	protein-coding
10_siC_WDR5_peak_814	chr1	150898644	150899207	+	981	NA	promoter-TSS (NM_001243491)	promoter-TSS (NM_001243491)	86	NM_012432	9869	Hs.643565	NM_012432	ENSG00000143379	SETDB1	ESET|H3-K9-HMTase4|KG1T|KMT1E|TDRD21	SET domain bifurcated histone lysine methyltransferase 1	protein-coding
10_siC_WDR5_peak_14364	chr8	117778471	117779051	+	980	NA	promoter-TSS (NM_032334)	promoter-TSS (NM_032334)	-2	NM_032334	84294	Hs.86970	NM_032334	ENSG00000147679	UTP23	C8orf53	UTP23 small subunit processome component	protein-coding
10_siC_WDR5_peak_5696	chr16	74700390	74701101	+	980	NA	promoter-TSS (NM_018124)	promoter-TSS (NM_018124)	30	NM_001370537	55159	Hs.567525	NM_018124	ENSG00000168411	RFWD3	FANCW|RNF201	ring finger and WD repeat domain 3	protein-coding
10_siC_WDR5_peak_256	chr1	43389476	43390364	+	980	NA	Intergenic	CpG	34619	NM_006516	6513	Hs.473721	NM_006516	ENSG00000117394	SLC2A1	CSE|DYT17|DYT18|DYT9|EIG12|GLUT|GLUT-1|GLUT1|GLUT1DS|HTLVR|PED|SDCHCN	solute carrier family 2 member 1	protein-coding
10_siC_WDR5_peak_14458	chr8	143751028	143751561	+	979	NA	promoter-TSS (NR_033343)	promoter-TSS (NR_033343)	91	NM_001077527	8629	Hs.535903	NM_003724	ENSG00000234616	JRK	JH8|jerky	Jrk helix-turn-helix protein	protein-coding
10_siC_WDR5_peak_14183	chr8	67579223	67580017	+	979	NA	promoter-TSS (NM_025054)	promoter-TSS (NM_025054)	-154	NM_025054	80124	Hs.632066	NM_025054	ENSG00000175073	VCPIP1	DUBA3|VCIP135	valosin containing protein interacting protein 1	protein-coding
10_siC_WDR5_peak_15083	chr9	136023730	136024640	+	979	NA	intron (NM_001042368, intron 1 of 17)	MIR3|SINE|MIR	412	NM_001042368	5900	Hs.106185	NM_006266	ENSG00000160271	RALGDS	RGDS|RGF|RalGEF	ral guanine nucleotide dissociation stimulator	protein-coding
10_siC_WDR5_peak_13518	chr7	92219137	92219894	+	978	NA	promoter-TSS (NM_001288584)	promoter-TSS (NM_001288584)	-152	NM_001288584	257415	Hs.18564	NM_152789	ENSG00000234545	FAM133B	-	family with sequence similarity 133 member B	protein-coding
10_siC_WDR5_peak_13427	chr7	72424860	72425550	+	978	NA	promoter-TSS (NR_033323)	promoter-TSS (NR_033323)	97	NR_033323	260294	Hs.510927	NM_148936	ENSG00000106133	NSUN5P2	NOL1R2|NSUN5C|WBSCR20B|WBSCR20C	NSUN5 pseudogene 2	pseudo
10_siC_WDR5_peak_10818	chr4	13629141	13629851	+	978	NA	promoter-TSS (NR_049814)	promoter-TSS (NR_049814)	7	NR_049814	100847023		NR_049814	ENSG00000266240	MIR5091	mir-5091	microRNA 5091	ncRNA
10_siC_WDR5_peak_5400	chr16	19940275	19940841	+	977	NA	Intergenic	Intergenic	-43602	NM_001304771	51704	Hs.148685	NM_016235	ENSG00000167191	GPRC5B	RAIG-2|RAIG2	G protein-coupled receptor class C group 5 member B	protein-coding
10_siC_WDR5_peak_14411	chr8	128956810	128957238	+	977	NA	intron (NR_003367, intron 3 of 8)	intron (NR_003367, intron 3 of 8)	3945	NR_103558	641384	Hs.629674	NM_001037234	ENSG00000280055	TMEM75	-	transmembrane protein 75	ncRNA
10_siC_WDR5_peak_7954	chr2	21022464	21023068	+	975	NA	promoter-TSS (NM_001282720)	promoter-TSS (NM_001282720)	95	NM_001282720	60526	Hs.187823	NM_021925	ENSG00000118961	LDAH	C2orf43|hLDAH	lipid droplet associated hydrolase	protein-coding
10_siC_WDR5_peak_10743	chr4	492687	493268	+	973	NA	promoter-TSS (NM_001345987)	promoter-TSS (NM_001345987)	-12	NR_144328	54872	Hs.7099	NM_017733	ENSG00000174227	PIGG	GPI7|LAS21|MRT53|PRO4405|RLGS1930	phosphatidylinositol glycan anchor biosynthesis class G	protein-coding
10_siC_WDR5_peak_7802	chr19	58330862	58331502	+	972	NA	Intergenic	CpG	-4901	NM_024762	79818	Hs.560727	NM_024762	ENSG00000178935	ZNF552	-	zinc finger protein 552	protein-coding
10_siC_WDR5_peak_6161	chr17	41322034	41323447	+	971	NA	promoter-TSS (NM_001291572)	promoter-TSS (NM_001291572)	314	NM_031862	4077	Hs.277721	NM_005899	ENSG00000188554	NBR1	1A1-3B|IAI3B|M17S2|MIG19	NBR1 autophagy cargo receptor	protein-coding
10_siC_WDR5_peak_6098	chr17	37844015	37844593	+	970	NA	promoter-TSS (NM_033419)	promoter-TSS (NM_033419)	6	NM_033419	93210	Hs.462971	NM_033419	ENSG00000161395	PGAP3	AGLA546|CAB2|PERLD1|PP1498|hCOS16	post-GPI attachment to proteins 3	protein-coding
10_siC_WDR5_peak_7673	chr19	49990508	49991621	+	970	NA	intron (NM_012423, intron 1 of 7)	intron (NM_012423, intron 1 of 7)	199	NM_012423	23521	Hs.523185	NM_012423	ENSG00000142541	RPL13A	L13A|TSTA1	ribosomal protein L13a	protein-coding
10_siC_WDR5_peak_8296	chr2	70417586	70418292	+	970	NA	promoter-TSS (NM_001348758)	promoter-TSS (NM_001348758)	-96	NM_001348758	54980	Hs.720049	NM_017880	ENSG00000115998	C2orf42	-	chromosome 2 open reading frame 42	protein-coding
10_siC_WDR5_peak_13199	chr7	30065997	30066744	+	970	NA	promoter-TSS (NM_017946)	promoter-TSS (NM_017946)	47	NM_017946	55033	Hs.390838	NM_017946	ENSG00000106080	FKBP14	EDSKMH|EDSKSCL2|FKBP22|IPBP12	FKBP prolyl isomerase 14	protein-coding
10_siC_WDR5_peak_5793	chr17	1619488	1619954	+	969	NA	promoter-TSS (NR_028505)	promoter-TSS (NR_028505)	-96	NM_001163673	124997	Hs.234572	NM_152348	ENSG00000167716	WDR81	CAMRQ2|HYC3|PPP1R166|SORF-2	WD repeat domain 81	protein-coding
10_siC_WDR5_peak_8291	chr2	70141445	70142567	+	969	NA	promoter-TSS (NM_001202514)	promoter-TSS (NM_001202514)	-167	NM_001202514	4084	Hs.468908	NM_002357	ENSG00000059728	MXD1	BHLHC58|MAD|MAD1	MAX dimerization protein 1	protein-coding
10_siC_WDR5_peak_4527	chr14	93455341	93455819	+	969	NA	intron (NM_001142593, intron 5 of 10)	intron (NM_001142593, intron 5 of 10)	47739	NM_001363707	3705	Hs.308122	NM_014216	ENSG00000100605	ITPK1	ITRPK1	inositol-tetrakisphosphate 1-kinase	protein-coding
10_siC_WDR5_peak_5790	chr17	1466034	1466638	+	968	NA	promoter-TSS (NM_006224)	promoter-TSS (NM_006224)	-250	NM_006224	5306	Hs.429819	NM_006224	ENSG00000174238	PITPNA	HEL-S-36|PI-TPalpha|PITPN|VIB1A	phosphatidylinositol transfer protein alpha	protein-coding
10_siC_WDR5_peak_6260	chr17	46018471	46019309	+	968	NA	promoter-TSS (NR_103856)	promoter-TSS (NR_103856)	-47	NM_018129	55163	Hs.631742	NM_018129	ENSG00000108439	PNPO	HEL-S-302|PDXPO	pyridoxamine 5'-phosphate oxidase	protein-coding
10_siC_WDR5_peak_12752	chr6	113885634	113886340	+	968	NA	Intergenic	Intergenic	85290	NR_125844	101927686	Hs.402044	NR_125844	ENSG00000230943	LINC02541	-	long intergenic non-protein coding RNA 2541	ncRNA
10_siC_WDR5_peak_5578	chr16	53536645	53537737	+	967	NA	promoter-TSS (NM_022476)	promoter-TSS (NM_022476)	25	NM_001308325	64400	Hs.380897	NM_022476	ENSG00000166971	AKTIP	FT1|FTS	AKT interacting protein	protein-coding
10_siC_WDR5_peak_2630	chr11	71813857	71814838	+	967	NA	promoter-TSS (NM_017907)	promoter-TSS (NM_017907)	-4	NM_017907	55004	Hs.731528	NM_017907	ENSG00000149357	LAMTOR1	C11orf59|PDRO|Ragulator1|p18|p27RF-Rho	late endosomal/lysosomal adaptor, MAPK and MTOR activator 1	protein-coding
10_siC_WDR5_peak_13309	chr7	48018680	48019433	+	967	NA	non-coding (NR_037917, exon 1 of 9)	non-coding (NR_037917, exon 1 of 9)	156	NM_001363683	3364	Hs.152983	NM_004507	ENSG00000136273	HUS1	hHUS1	HUS1 checkpoint clamp component	protein-coding
10_siC_WDR5_peak_3397	chr12	69080414	69081183	+	967	NA	promoter-TSS (NM_001330192)	promoter-TSS (NM_001330192)	40	NM_001330192	57122	Hs.524574	NM_020401	ENSG00000111581	NUP107	NPHS11|NUP84|ODG6|ODG6; GAMOS7	nucleoporin 107	protein-coding
10_siC_WDR5_peak_374	chr1	55680422	55682018	+	966	NA	promoter-TSS (NM_015306)	promoter-TSS (NM_015306)	139	NR_038320	100507634	Hs.735428	NR_038320		LOC100507634	-	uncharacterized LOC100507634	ncRNA
10_siC_WDR5_peak_1589	chr10	13022040	13022611	+	964	NA	intron (NM_001282658, intron 6 of 6)	intron (NM_001282658, intron 6 of 6)	21388	NM_031455	83643	Hs.498720	NM_031455	ENSG00000151468	CCDC3	-	coiled-coil domain containing 3	protein-coding
10_siC_WDR5_peak_4408	chr14	73493664	73494211	+	964	NA	promoter-TSS (NM_001281734)	promoter-TSS (NM_001281734)	-123	NM_021260	53349	Hs.335106	NM_021260	ENSG00000165861	ZFYVE1	DFCP1|PPP1R172|SR3|TAFF1|ZNFN2A1	zinc finger FYVE-type containing 1	protein-coding
10_siC_WDR5_peak_2033	chr10	104405073	104405998	+	962	NA	intron (NM_001345950, intron 1 of 4)	intron (NM_001345950, intron 1 of 4)	1283	NR_144321	81603	Hs.336810	NM_030912	ENSG00000171206	TRIM8	GERP|RNF27	tripartite motif containing 8	protein-coding
10_siC_WDR5_peak_10966	chr4	74123658	74125200	+	962	NA	promoter-TSS (NM_015574)	promoter-TSS (NM_015574)	86	NM_198889	26057	Hs.601206	NM_015574	ENSG00000132466	ANKRD17	GTAR|MASK2|NY-BR-16	ankyrin repeat domain 17	protein-coding
10_siC_WDR5_peak_4382	chr14	69445823	69446417	+	962	NA	promoter-TSS (NM_001130004)	promoter-TSS (NM_001130004)	-37	NM_001130004	87	Hs.235750	NM_001102	ENSG00000072110	ACTN1	BDPLT15	actinin alpha 1	protein-coding
10_siC_WDR5_peak_5295	chr16	3081263	3081887	+	962	NA	promoter-TSS (NR_047572)	promoter-TSS (NR_047572)	-907	NR_047572	100128770	Hs.666223	NR_047572	ENSG00000205890	LOC100128770	-	uncharacterized LOC100128770	ncRNA
10_siC_WDR5_peak_8254	chr2	65356895	65357884	+	960	NA	promoter-TSS (NM_004161)	promoter-TSS (NM_004161)	46	NM_015543	5861	Hs.310645	NM_004161	ENSG00000138069	RAB1A	RAB1|YPT1	RAB1A, member RAS oncogene family	protein-coding
10_siC_WDR5_peak_9474	chr20	62694233	62694773	+	959	NA	promoter-TSS (NM_003195)	promoter-TSS (NM_003195)	-48	NM_003195	6919	Hs.505004	NM_003195	ENSG00000171703	TCEA2	TFIIS	transcription elongation factor A2	protein-coding
10_siC_WDR5_peak_8823	chr2	201753682	201754514	+	957	NA	promoter-TSS (NM_001136039)	promoter-TSS (NM_001136039)	3	NM_001369441	60491	Hs.145284	NM_021824	ENSG00000196290	NIF3L1	ALS2CR1|CALS-7|MDS015	NGG1 interacting factor 3 like 1	protein-coding
10_siC_WDR5_peak_4419	chr14	74551005	74552083	+	957	NA	promoter-TSS (NM_001024674)	promoter-TSS (NM_001024674)	-112	NM_001024674	91750	Hs.612866	NM_001024674	ENSG00000205659	LIN52	C14orf46|c14_5549	lin-52 DREAM MuvB core complex component	protein-coding
10_siC_WDR5_peak_7434	chr19	36208203	36208893	+	957	NA	promoter-TSS (NM_014727)	promoter-TSS (NM_014727)	-373	NM_014727	9757	Hs.92236	NM_014727	ENSG00000272333	KMT2B	CXXC10|DYT28|HRX2|MLL1B|MLL2|MLL4|TRX2|WBP-7|WBP7	lysine methyltransferase 2B	protein-coding
10_siC_WDR5_peak_4163	chr14	20937435	20938086	+	956	NA	intron (NM_000270, intron 1 of 5)	intron (NM_000270, intron 1 of 5)	222	NM_000270	4860	Hs.75514	NM_000270	ENSG00000198805	PNP	NP|PRO1837|PUNP	purine nucleoside phosphorylase	protein-coding
10_siC_WDR5_peak_2136	chr10	124739795	124740373	+	956	NA	exon (NM_001363531, exon 1 of 6)	exon (NM_001363531, exon 1 of 6)	167	NM_153336	118672	Hs.281004	NM_153336	ENSG00000179988	PSTK	C10orf89	phosphoseryl-tRNA kinase	protein-coding
10_siC_WDR5_peak_10753	chr4	1283067	1284065	+	956	NA	promoter-TSS (NM_001297430)	promoter-TSS (NM_001297430)	-113	NM_001297430	10296	Hs.139896	NM_005882	ENSG00000090316	MAEA	EMLP|EMP|GID9|HLC-10|P44EMLP|PIG5	macrophage erythroblast attacher	protein-coding
10_siC_WDR5_peak_11070	chr4	107236981	107238017	+	955	NA	promoter-TSS (NM_001163437)	promoter-TSS (NM_001163437)	-133	NM_001163435	93627	Hs.151498	NM_033115	ENSG00000145348	TBCK	HSPC302|IHPRF3|TBCKL	TBC1 domain containing kinase	protein-coding
10_siC_WDR5_peak_13114	chr7	13506539	13507151	+	955	NA	Intergenic	Intergenic	519294	NM_001163152	2115	Hs.22634	NM_004956	ENSG00000006468	ETV1	ER81	ETS variant 1	protein-coding
10_siC_WDR5_peak_12204	chr6	23003860	23004713	+	955	NA	Intergenic	Intergenic	-286133	NR_134614	105374972	Hs.484889	NR_134613		LOC105374972	-	uncharacterized LOC105374972	ncRNA
10_siC_WDR5_peak_3940	chr13	41837424	41838143	+	955	NA	promoter-TSS (NM_004294)	promoter-TSS (NM_004294)	-71	NM_004294	9617	Hs.382176	NM_004294	ENSG00000120662	MTRF1	MRF1|MTTRF1|RF1	mitochondrial translation release factor 1	protein-coding
10_siC_WDR5_peak_14278	chr8	93639796	93640468	+	955	NA	intron (NR_125827, intron 3 of 4)	intron (NR_125827, intron 3 of 4)	27590	NR_125827	102724710	Hs.125714	NR_125827	ENSG00000253634	LOC102724710	-	uncharacterized LOC102724710	ncRNA
10_siC_WDR5_peak_5280	chr16	2570068	2570630	+	955	NA	promoter-TSS (NM_001330449)	promoter-TSS (NM_001330449)	-23	NM_015944	51005	Hs.740430	NM_015944	ENSG00000162066	AMDHD2	CGI-14	amidohydrolase domain containing 2	protein-coding
10_siC_WDR5_peak_164	chr1	28240906	28241744	+	954	NA	promoter-TSS (NM_001355129)	promoter-TSS (NM_001355129)	-17	NM_001355129	6118	Hs.79411	NM_002946	ENSG00000117748	RPA2	REPA2|RP-A p32|RP-A p34|RPA32	replication protein A2	protein-coding
10_siC_WDR5_peak_12440	chr6	41888675	41889587	+	954	NA	promoter-TSS (NM_001305455)	promoter-TSS (NM_001305455)	-106	NM_004053	705	Hs.106880	NM_004053	ENSG00000112578	BYSL	BYSTIN|Enp1	bystin like	protein-coding
10_siC_WDR5_peak_10816	chr4	10868110	10868693	+	954	NA	Intergenic	Intergenic	-182009	NM_052964	116449	Hs.62772	NM_052964	ENSG00000109684	CLNK	MIST	cytokine dependent hematopoietic cell linker	protein-coding
10_siC_WDR5_peak_1553	chr10	1102085	1102980	+	952	NA	non-coding (NR_134300, exon 1 of 4)	non-coding (NR_134300, exon 1 of 4)	112	NM_001317955	3422	Hs.283652	NM_004508	ENSG00000067064	IDI1	IPP1|IPPI1	isopentenyl-diphosphate delta isomerase 1	protein-coding
10_siC_WDR5_peak_9943	chr3	10067883	10068510	+	952	NA	promoter-TSS (NM_033084)	promoter-TSS (NM_033084)	75	NM_001319984	2177	Hs.208388	NM_033084	ENSG00000144554	FANCD2	FA-D2|FA4|FACD|FAD|FAD2|FANCD	FA complementation group D2	protein-coding
10_siC_WDR5_peak_7226	chr19	12405426	12406040	+	952	NA	promoter-TSS (NM_001164276)	promoter-TSS (NM_001164276)	-19	NM_001353552	51710	Hs.296731	NM_016264	ENSG00000197857	ZNF44	GIOT-2|KOX7|ZNF|ZNF504|ZNF55|ZNF58	zinc finger protein 44	protein-coding
10_siC_WDR5_peak_13332	chr7	55433223	55434410	+	952	NA	exon (NM_018697, exon 1 of 9)	exon (NM_018697, exon 1 of 9)	675	NM_018697	55915	Hs.595384	NM_018697	ENSG00000132434	LANCL2	GPR69B|TASP	LanC like 2	protein-coding
10_siC_WDR5_peak_5411	chr16	21610465	21611622	+	952	NA	promoter-TSS (NR_110930)	promoter-TSS (NR_110930)	145	NM_016025	51108	Hs.279583	NM_016025	ENSG00000197006	METTL9	CGI-81|DREV|DREV1|PAP1	methyltransferase like 9	protein-coding
10_siC_WDR5_peak_2607	chr11	67797641	67798388	+	951	NA	promoter-TSS (NM_002496)	promoter-TSS (NM_002496)	-134	NM_002496	4728	Hs.90443	NM_002496	ENSG00000110717	NDUFS8	CI-23k|CI23KD|MC1DN2|TYKY	NADH:ubiquinone oxidoreductase core subunit S8	protein-coding
10_siC_WDR5_peak_9300	chr20	40321331	40322442	+	950	NA	Intergenic	CpG	-74870	NM_032221	84181	Hs.740645	NM_032221	ENSG00000124177	CHD6	CHD-6|CHD5|RIGB	chromodomain helicase DNA binding protein 6	protein-coding
10_siC_WDR5_peak_7574	chr19	44617160	44617672	+	950	NA	promoter-TSS (NM_001321685)	promoter-TSS (NM_001321685)	-80	NR_033341	100379224	Hs.585869	NR_033341	ENSG00000186019	LOC100379224	-	uncharacterized LOC100379224	ncRNA
10_siC_WDR5_peak_6851	chr18	32870152	32870779	+	950	NA	promoter-TSS (NM_001288711)	promoter-TSS (NM_001288711)	229	NR_024565	10778	Hs.314246	NM_006629	ENSG00000257267	ZNF271P	CT-ZFP48|HZF7|ZNF-EB|ZNF-dp|ZNF271|ZNFEB	zinc finger protein 271, pseudogene	pseudo
10_siC_WDR5_peak_3693	chr12	119837045	119837640	+	950	NA	intron (NM_178499, intron 1 of 13)	intron (NM_178499, intron 1 of 13)	64808	NM_178499	160777	Hs.98188	NM_178499	ENSG00000183273	CCDC60	-	coiled-coil domain containing 60	protein-coding
10_siC_WDR5_peak_3642	chr12	112856387	112857168	+	949	NA	promoter-TSS (NM_080601)	promoter-TSS (NM_080601)	26	NM_080601	5781	Hs.506852	NM_002834	ENSG00000179295	PTPN11	BPTP3|CFC|JMML|METCDS|NS1|PTP-1D|PTP2C|SH-PTP2|SH-PTP3|SHP2	protein tyrosine phosphatase non-receptor type 11	protein-coding
10_siC_WDR5_peak_9675	chr22	22336924	22337432	+	949	NA	promoter-TSS (NM_001349848)	promoter-TSS (NM_001349848)	6	NM_001282113	8940	Hs.436401	NM_003935	ENSG00000100038	TOP3B	TOP3B1	DNA topoisomerase III beta	protein-coding
10_siC_WDR5_peak_3635	chr12	112279625	112280583	+	949	NA	promoter-TSS (NR_152608)	promoter-TSS (NR_152608)	72	NM_003668	8550	Hs.333120	NM_003668	ENSG00000089022	MAPKAPK5	MAPKAP-K5|MK-5|MK5|PRAK	MAPK activated protein kinase 5	protein-coding
10_siC_WDR5_peak_2372	chr11	35639143	35640065	+	948	NA	promoter-TSS (NM_014344)	promoter-TSS (NM_014344)	-404	NM_014344	24147	Hs.39384	NM_014344	ENSG00000179431	FJX1	-	four-jointed box kinase 1	protein-coding
10_siC_WDR5_peak_889	chr1	155214179	155214933	+	948	NA	promoter-TSS (NM_001171811)	promoter-TSS (NM_001171811)	-138	NM_001005742	2629	Hs.282997	NM_000157	ENSG00000177628	GBA	GBA1|GCB|GLUC	glucosylceramidase beta	protein-coding
10_siC_WDR5_peak_6821	chr18	21083074	21083687	+	948	NA	promoter-TSS (NM_001276342)	promoter-TSS (NM_001276342)	-54	NM_001276342	29919	Hs.464779	NM_013326	ENSG00000141452	RMC1	C18orf8|HsT2591|MIC1|Mic-1|WDR98	regulator of MON1-CCZ1	protein-coding
10_siC_WDR5_peak_2357	chr11	32913824	32915313	+	945	NA	5' UTR (NM_001076786, exon 1 of 13)	5' UTR (NM_001076786, exon 1 of 13)	211	NM_001076786	79832	Hs.369368	NM_024774	ENSG00000060749	QSER1	-	glutamine and serine rich 1	protein-coding
10_siC_WDR5_peak_10062	chr3	38206306	38207297	+	945	NA	promoter-TSS (NM_005109)	promoter-TSS (NM_005109)	-227	NM_005109	9943	Hs.475970	NM_005109	ENSG00000172939	OXSR1	OSR1	oxidative stress responsive kinase 1	protein-coding
10_siC_WDR5_peak_1068	chr1	179197961	179199191	+	945	NA	5' UTR (NM_007314, exon 1 of 12)	5' UTR (NM_007314, exon 1 of 12)	236	NM_001168238	27	Hs.159472	NM_005158	ENSG00000143322	ABL2	ABLL|ARG	ABL proto-oncogene 2, non-receptor tyrosine kinase	protein-coding
10_siC_WDR5_peak_12629	chr6	91296552	91297302	+	945	NA	promoter-TSS (NM_145331)	promoter-TSS (NM_145331)	-136	NM_003188	6885	Hs.594838	NM_003188	ENSG00000135341	MAP3K7	CSCF|FMD2|MEKK7|TAK1|TGF1a	mitogen-activated protein kinase kinase kinase 7	protein-coding
10_siC_WDR5_peak_8149	chr2	46925638	46926934	+	945	NA	promoter-TSS (NM_144949)	promoter-TSS (NM_144949)	-148	NM_144949	9655	Hs.468426	NM_014011	ENSG00000171150	SOCS5	CIS6|CISH6|Cish5|SOCS-5	suppressor of cytokine signaling 5	protein-coding
10_siC_WDR5_peak_7025	chr19	633378	633868	+	945	NA	promoter-TSS (NM_005035)	promoter-TSS (NM_005035)	-86	NM_005035	5442	Hs.254113	NM_005035	ENSG00000099821	POLRMT	APOLMT|MTRNAP|MTRPOL|h-mtRPOL	RNA polymerase mitochondrial	protein-coding
10_siC_WDR5_peak_7469	chr19	37808386	37809101	+	943	NA	promoter-TSS (NM_001329775)	promoter-TSS (NM_001329775)	-41	NM_001329766	284459	Hs.640243	NM_181786	ENSG00000181666	ZNF875	HKR1	zinc finger protein 875	protein-coding
10_siC_WDR5_peak_4373	chr14	68141089	68141879	+	943	NA	promoter-TSS (NM_006370)	promoter-TSS (NM_006370)	-135	NM_006370	10490	Hs.741177	NM_006370	ENSG00000100568	VTI1B	VTI1|VTI1-LIKE|VTI1L|VTI2|v-SNARE|vti1-rp1	vesicle transport through interaction with t-SNAREs 1B	protein-coding
10_siC_WDR5_peak_4567	chr14	100070559	100070923	+	941	NA	promoter-TSS (NM_001329411)	promoter-TSS (NM_001329411)	-134	NM_001329411	84439	Hs.131714	NM_032425	ENSG00000182218	HHIPL1	KIAA1822|UNQ9245	HHIP like 1	protein-coding
10_siC_WDR5_peak_7468	chr19	37742232	37743069	+	941	NA	promoter-TSS (NR_110718)	promoter-TSS (NR_110718)	-137	NR_110718	101927667	Hs.633102	NR_110718	ENSG00000226686	LINC01535	-	long intergenic non-protein coding RNA 1535	ncRNA
10_siC_WDR5_peak_9862	chr22	44350949	44351544	+	941	NA	promoter-TSS (NM_015380)	promoter-TSS (NM_015380)	-76	NM_015380	25813	Hs.505824	NM_015380	ENSG00000100347	SAMM50	CGI-51|OMP85|SAM50|TOB55|TRG-3|YNL026W	SAMM50 sorting and assembly machinery component	protein-coding
10_siC_WDR5_peak_15125	chr9	139760536	139761196	+	941	NA	promoter-TSS (NM_001281297)	promoter-TSS (NM_001281297)	-78	NM_153200	8721	Hs.174050	NM_003792	ENSG00000107223	EDF1	CFAP280|EDF-1|MBF1	endothelial differentiation related factor 1	protein-coding
10_siC_WDR5_peak_6620	chr17	73974883	73976011	+	940	NA	promoter-TSS (NM_004035)	promoter-TSS (NM_004035)	126	NM_001113324	100134934	Hs.593566	NM_001113324	ENSG00000257949	TEN1	C17orf106	TEN1 subunit of CST complex	protein-coding
10_siC_WDR5_peak_9497	chr21	27653007	27653358	+	940	NA	Intergenic	Intergenic	-109736	NM_001136131	351	Hs.434980	NM_000484	ENSG00000142192	APP	AAA|ABETA|ABPP|AD1|APPI|CTFgamma|CVAP|PN-II|PN2|preA4	amyloid beta precursor protein	protein-coding
10_siC_WDR5_peak_13182	chr7	28312076	28312424	+	939	NA	Intergenic	Intergenic	-26690	NM_182899	9586	Hs.437075	NM_004904	ENSG00000146592	CREB5	CRE-BPA|CREB-5|CREBPA	cAMP responsive element binding protein 5	protein-coding
10_siC_WDR5_peak_4680	chr15	38746154	38746746	+	939	NA	intron (NM_173611, intron 1 of 7)	CpG	122	NM_173611	283742	Hs.6799	NM_173611	ENSG00000171262	FAM98B	-	family with sequence similarity 98 member B	protein-coding
10_siC_WDR5_peak_12497	chr6	49430665	49431478	+	938	NA	promoter-TSS (NM_018132)	promoter-TSS (NM_018132)	-12	NM_018132	55166	Hs.88663	NM_018132	ENSG00000031691	CENPQ	C6orf139|CENP-Q	centromere protein Q	protein-coding
10_siC_WDR5_peak_4562	chr14	99946816	99948020	+	938	NA	promoter-TSS (NM_001099402)	promoter-TSS (NM_001099402)	-222	NM_199123	84193	Hs.510407	NM_032233	ENSG00000183576	SETD3	C14orf154|hSETD3	SET domain containing 3, actin histidine methyltransferase	protein-coding
10_siC_WDR5_peak_11069	chr4	106629539	106630296	+	938	NA	promoter-TSS (NM_001142471)	promoter-TSS (NM_001142471)	-24	NM_024751	79807	Hs.161429	NM_024751	ENSG00000138780	GSTCD	-	glutathione S-transferase C-terminal domain containing	protein-coding
10_siC_WDR5_peak_15148	chrX	3732605	3733238	+	937	NA	Intergenic	CpG	29014	NR_034031	389906	Hs.636199	NM_001045547		LOC389906	-	zinc finger protein 839 pseudogene	pseudo
10_siC_WDR5_peak_7805	chr19	58427701	58428280	+	936	NA	promoter-TSS (NM_001297734)	promoter-TSS (NM_001297734)	-30	NM_152475	147687	Hs.567710	NM_152475	ENSG00000173480	ZNF417	-	zinc finger protein 417	protein-coding
10_siC_WDR5_peak_13057	chr7	5463395	5464413	+	935	NA	promoter-TSS (NM_001080495)	promoter-TSS (NM_001080495)	-727	NM_001080495	84629	Hs.520638	NM_001013722	ENSG00000182095	TNRC18	CAGL79|TNRC18A	trinucleotide repeat containing 18	protein-coding
10_siC_WDR5_peak_8804	chr2	198364199	198365451	+	934	NA	promoter-TSS (NM_001202485)	promoter-TSS (NM_001202485)	173	NM_199440	3329	Hs.595053	NM_002156	ENSG00000144381	HSPD1	CPN60|GROEL|HLD4|HSP-60|HSP60|HSP65|HuCHA60|SPG13	heat shock protein family D (Hsp60) member 1	protein-coding
10_siC_WDR5_peak_2561	chr11	65382639	65383597	+	933	NA	promoter-TSS (NM_032223)	promoter-TSS (NM_032223)	-665	NM_032223	399909	Hs.380801	NM_032223	ENSG00000197136	PCNX3	PCNXL3	pecanex 3	protein-coding
10_siC_WDR5_peak_7406	chr19	32836240	32836974	+	933	NA	promoter-TSS (NM_001136156)	promoter-TSS (NM_001136156)	91	NM_014910	22847	Hs.205392	NM_014910	ENSG00000168813	ZNF507	-	zinc finger protein 507	protein-coding
10_siC_WDR5_peak_6695	chr17	79008343	79008966	+	932	NA	promoter-TSS (NR_026857)	promoter-TSS (NR_026857)	-135	NR_026857	440465	Hs.448889	NM_001004336	ENSG00000226137	BAIAP2-DT	BAIAP2-AS1|lnc-BAIAP2	BAIAP2 divergent transcript	ncRNA
10_siC_WDR5_peak_8255	chr2	65454330	65455482	+	931	NA	promoter-TSS (NM_005722)	promoter-TSS (NM_005722)	77	NM_005722	10097	Hs.643727	NM_005722	ENSG00000138071	ACTR2	ARP2	actin related protein 2	protein-coding
10_siC_WDR5_peak_3532	chr12	102455395	102456070	+	930	NA	promoter-TSS (NM_016053)	promoter-TSS (NM_016053)	37	NM_016053	51019	Hs.405692	NM_016053	ENSG00000120860	WASHC3	CCDC53|CGI-116	WASH complex subunit 3	protein-coding
10_siC_WDR5_peak_7118	chr19	4723532	4724007	+	930	NA	promoter-TSS (NM_001365987)	promoter-TSS (NM_001365987)	85	NM_139159	91039	Hs.515081	NM_139159	ENSG00000142002	DPP9	DP9|DPLP9|DPP IX|DPRP-2|DPRP2	dipeptidyl peptidase 9	protein-coding
10_siC_WDR5_peak_2549	chr11	64863391	64864110	+	930	NA	promoter-TSS (NM_013265)	promoter-TSS (NM_013265)	64	NM_013265	738	Hs.277517	NM_013265	ENSG00000149823	VPS51	ANG2|ANG3|C11orf2|C11orf3|FFR	VPS51 subunit of GARP complex	protein-coding
10_siC_WDR5_peak_6794	chr18	11851154	11851802	+	930	NA	promoter-TSS (NM_020412)	promoter-TSS (NM_020412)	66	NM_020412	57132	Hs.656244	NM_020412	ENSG00000255112	CHMP1B	C10orf2|C18-ORF2|C18orf2|CHMP1.5|Vps46-2|Vps46B|hVps46-2	charged multivesicular body protein 1B	protein-coding
10_siC_WDR5_peak_2390	chr11	43902097	43902782	+	930	NA	promoter-TSS (NM_139178)	promoter-TSS (NM_139178)	58	NM_139178	221120	Hs.720708	NM_139178	ENSG00000166199	ALKBH3	ABH3|DEPC-1|DEPC1|PCA1|hABH3	alkB homolog 3, alpha-ketoglutaratedependent dioxygenase	protein-coding
10_siC_WDR5_peak_10026	chr3	28617050	28618332	+	930	NA	intron (NR_038840, intron 1 of 4)	CpG	922	NR_038840	645206	Hs.376725	NR_038840		LINC00693	-	long intergenic non-protein coding RNA 693	ncRNA
10_siC_WDR5_peak_3107	chr12	31226294	31227835	+	929	NA	promoter-TSS (NR_038927)	promoter-TSS (NR_038927)	270	NM_004399	1663	Hs.443960	NM_004399	ENSG00000013573	DDX11	CHL1|CHLR1|KRG2|WABS	DEAD/H-box helicase 11	protein-coding
10_siC_WDR5_peak_7784	chr19	57900960	57901561	+	928	NA	promoter-TSS (NM_001172773)	promoter-TSS (NM_001172773)	38	NM_001172773	147694	Hs.126905	NM_152909	ENSG00000188785	ZNF548	-	zinc finger protein 548	protein-coding
10_siC_WDR5_peak_834	chr1	151735441	151736253	+	928	NA	promoter-TSS (NM_001301371)	promoter-TSS (NM_001301371)	-109	NM_001301371	51686	Hs.713789	NM_016178	ENSG00000143450	OAZ3	AZ3|OAZ-t|TISP15	ornithine decarboxylase antizyme 3	protein-coding
10_siC_WDR5_peak_10770	chr4	2470319	2471224	+	928	NA	promoter-TSS (NM_001185009)	promoter-TSS (NM_001185009)	-62	NM_001185010	6047	Hs.66394	NM_002938	ENSG00000063978	RNF4	RES4-26|SLX5|SNURF	ring finger protein 4	protein-coding
10_siC_WDR5_peak_2604	chr11	67275391	67276180	+	928	NA	promoter-TSS (NM_001271849)	promoter-TSS (NM_001271849)	-152	NR_073484	10263	Hs.523835	NM_005851	ENSG00000167797	CDK2AP2	DOC-1R|p14	cyclin dependent kinase 2 associated protein 2	protein-coding
10_siC_WDR5_peak_3449	chr12	82751894	82752702	+	927	NA	promoter-TSS (NM_001319675)	promoter-TSS (NM_001319675)	-10	NR_144942	84190	Hs.506222	NM_032230	ENSG00000127720	METTL25	C12orf26	methyltransferase like 25	protein-coding
10_siC_WDR5_peak_14090	chr8	37962463	37963410	+	927	NA	promoter-TSS (NM_001261832)	promoter-TSS (NM_001261832)	-75	NM_001282272	9070	Hs.521530	NM_004674	ENSG00000129691	ASH2L	ASH2|ASH2L1|ASH2L2|Bre2	ASH2 like, histone lysine methyltransferase complex subunit	protein-coding
10_siC_WDR5_peak_9186	chr20	21283420	21284626	+	927	NA	promoter-TSS (NM_001317960)	promoter-TSS (NM_001317960)	54	NM_012255	22803	Hs.255932	NM_012255	ENSG00000088930	XRN2	-	5'-3' exoribonuclease 2	protein-coding
10_siC_WDR5_peak_7801	chr19	58325870	58326623	+	927	NA	promoter-TSS (NM_024762)	promoter-TSS (NM_024762)	35	NM_024762	79818	Hs.560727	NM_024762	ENSG00000178935	ZNF552	-	zinc finger protein 552	protein-coding
10_siC_WDR5_peak_10071	chr3	39447838	39448693	+	927	NA	promoter-TSS (NM_001304288)	promoter-TSS (NM_001304288)	54	NM_001304288	3921	Hs.449909	NM_002295	ENSG00000168028	RPSA	37LRP|67LR|ICAS|LAMBR|LAMR1|LBP|LBP/p40|LRP|LRP/LR|NEM/1CHD4|SA|lamR|p40	ribosomal protein SA	protein-coding
10_siC_WDR5_peak_14595	chr9	23826181	23826580	+	927	NA	promoter-TSS (NM_001351463)	promoter-TSS (NM_001351463)	-142	NM_001351477	1993	Hs.166109	NM_004432	ENSG00000107105	ELAVL2	HEL-N1|HELN1|HUB	ELAV like RNA binding protein 2	protein-coding
10_siC_WDR5_peak_4777	chr15	50646389	50647951	+	926	NA	promoter-TSS (NR_026891)	promoter-TSS (NR_026891)	-94	NR_026891	55056	Hs.511316	NM_017976	ENSG00000285410	GABPB1-IT1	-	GABPB1 intronic transcript	ncRNA
10_siC_WDR5_peak_8234	chr2	62932183	62933109	+	925	NA	promoter-TSS (NM_001354222)	promoter-TSS (NM_001354222)	-113	NM_001354212	23301	Hs.271667	NM_015252	ENSG00000115504	EHBP1	HPC12|NACSIN	EH domain binding protein 1	protein-coding
10_siC_WDR5_peak_9778	chr22	38141757	38142450	+	925	NA	promoter-TSS (NM_007032)	promoter-TSS (NM_007032)	-138	NM_007032	11078	Hs.533030	NM_007032	ENSG00000100106	TRIOBP	DFNB28|HRIHFB2122|TAP68|TARA|dJ37E16.4	TRIO and F-actin binding protein	protein-coding
10_siC_WDR5_peak_2500	chr11	62521297	62521896	+	925	NA	promoter-TSS (NM_001363108)	promoter-TSS (NM_001363108)	36	NM_001370809	79842	Hs.147554	NM_024784	ENSG00000185670	ZBTB3	-	zinc finger and BTB domain containing 3	protein-coding
10_siC_WDR5_peak_1364	chr1	224517621	224518368	+	923	NA	promoter-TSS (NM_002533)	promoter-TSS (NM_002533)	-103	NM_206840	4931	Hs.497867	NM_002533	ENSG00000143748	NVL	NVL2	nuclear VCP like	protein-coding
10_siC_WDR5_peak_6476	chr17	61904018	61905040	+	922	NA	promoter-TSS (NM_001199163)	promoter-TSS (NM_001199163)	-262	NM_002805	5705	Hs.79387	NM_002805	ENSG00000087191	PSMC5	S8|SUG-1|SUG1|TBP10|TRIP1|p45|p45/SUG	proteasome 26S subunit, ATPase 5	protein-coding
10_siC_WDR5_peak_2823	chr11	117198326	117198848	+	922	NA	promoter-TSS (NM_014956)	promoter-TSS (NM_014956)	17	NM_014956	22897	Hs.504009	NM_014956	ENSG00000110274	CEP164	NPHP15	centrosomal protein 164	protein-coding
10_siC_WDR5_peak_5009	chr15	75628098	75628763	+	921	NA	promoter-TSS (NM_001284377)	promoter-TSS (NM_001284377)	26	NM_001321848	54939	Hs.351327	NM_017828	ENSG00000140365	COMMD4	-	COMM domain containing 4	protein-coding
10_siC_WDR5_peak_7909	chr2	9770334	9771437	+	921	NA	intron (NM_006826, intron 1 of 5)	CpG-14702	241	NM_006826	10971	Hs.74405	NM_006826	ENSG00000134308	YWHAQ	14-3-3|1C5|HS1	tyrosine 3-monooxygenase/tryptophan 5-monooxygenase activation protein theta	protein-coding
10_siC_WDR5_peak_13732	chr7	133543609	133544337	+	921	NA	intron (NM_021807, intron 11 of 17)	intron (NM_021807, intron 11 of 17)	-34332	NR_120513	101928861	Hs.675747	NR_120513		LOC101928861	-	uncharacterized LOC101928861	ncRNA
10_siC_WDR5_peak_10169	chr3	50396836	50397256	+	920	NA	promoter-TSS (NM_007024)	promoter-TSS (NM_007024)	-94	NM_007024	11070	Hs.91566	NM_007024	ENSG00000126062	TMEM115	PL6	transmembrane protein 115	protein-coding
10_siC_WDR5_peak_12535	chr6	58287428	58287961	+	919	NA	promoter-TSS (NR_003660)	promoter-TSS (NR_003660)	30	NR_132997	106660613	Hs.561539	NR_003660	ENSG00000283352	LINC00680-GUSBP4	-	LINC00680-GUSBP4 readthrough	pseudo
10_siC_WDR5_peak_10126	chr3	47844147	47845139	+	919	NA	promoter-TSS (NM_138615)	promoter-TSS (NM_138615)	15	NM_138615	22907	Hs.517948	NM_014966	ENSG00000132153	DHX30	DDX30|NEDMIAL|RETCOR	DExH-box helicase 30	protein-coding
10_siC_WDR5_peak_3427	chr12	76741804	76742583	+	919	NA	promoter-TSS (NM_024685)	promoter-TSS (NM_024685)	2	NM_024685	79738	Hs.96322	NM_024685	ENSG00000179941	BBS10	C12orf58	Bardet-Biedl syndrome 10	protein-coding
10_siC_WDR5_peak_7645	chr19	49016742	49017346	+	918	NA	promoter-TSS (NM_001080434)	promoter-TSS (NM_001080434)	-598	NM_001080434	114783	Hs.207426	NM_001080434	ENSG00000142235	LMTK3	LMR3|PPP1R101|TYKLM3	lemur tyrosine kinase 3	protein-coding
10_siC_WDR5_peak_3522	chr12	98987166	98987979	+	918	NA	5' UTR (NM_213611, exon 1 of 7)	5' UTR (NM_213611, exon 1 of 7)	108	NM_213611	5250	Hs.290404	NM_002635	ENSG00000075415	SLC25A3	OK/SW-cl.48|PHC|PTP	solute carrier family 25 member 3	protein-coding
10_siC_WDR5_peak_10325	chr3	100119674	100120851	+	918	NA	promoter-TSS (NM_014820)	promoter-TSS (NM_014820)	-121	NM_001085451	348801	Hs.591294	NM_001085451	ENSG00000206535	LNP1	NP3	leukemia NUP98 fusion partner 1	protein-coding
10_siC_WDR5_peak_9270	chr20	35807214	35808118	+	917	NA	promoter-TSS (NM_001324303)	promoter-TSS (NM_001324303)	-67	NM_001324303	6185	Hs.370895	NM_002951	ENSG00000118705	RPN2	RIBIIR|RPN-II|RPNII|SWP1	ribophorin II	protein-coding
10_siC_WDR5_peak_13352	chr7	65215423	65216328	+	917	NA	promoter-TSS (NR_103527)	promoter-TSS (NR_103527)	36	NR_103527	441242	Hs.373941	NM_001013464	ENSG00000272693	LOC441242	-	uncharacterized LOC441242	ncRNA
10_siC_WDR5_peak_7818	chr19	58891889	58892842	+	916	NA	promoter-TSS (NM_138466)	promoter-TSS (NM_138466)	32	NR_049780	116412	Hs.222236	NM_138466	ENSG00000152475	ZNF837	-	zinc finger protein 837	protein-coding
10_siC_WDR5_peak_14798	chr9	96215507	96216095	+	915	NA	promoter-TSS (NM_198841)	promoter-TSS (NM_198841)	62	NM_198841	158293	Hs.350364	NM_198841	ENSG00000188938	FAM120AOS	C9orf10OS	family with sequence similarity 120A opposite strand	protein-coding
10_siC_WDR5_peak_11736	chr5	132387117	132388748	+	915	NA	5' UTR (NM_002154, exon 1 of 19)	5' UTR (NM_002154, exon 1 of 19)	227	NM_002154	3308	Hs.90093	NM_002154	ENSG00000170606	HSPA4	APG-2|HEL-S-5a|HS24/P52|HSPH2|RY|hsp70|hsp70RY	heat shock protein family A (Hsp70) member 4	protein-coding
10_siC_WDR5_peak_4354	chr14	64009554	64010791	+	914	NA	promoter-TSS (NR_104104)	promoter-TSS (NR_104104)	-59	NM_001354926	5529	Hs.334868	NM_006246	ENSG00000154001	PPP2R5E	B56E|B56epsilon	protein phosphatase 2 regulatory subunit B'epsilon	protein-coding
10_siC_WDR5_peak_5686	chr16	72127369	72128051	+	914	NA	promoter-TSS (NM_017853)	promoter-TSS (NM_017853)	-36	NM_014003	9785	Hs.151218	NM_014003	ENSG00000140829	DHX38	DDX38|PRP16|PRPF16|RP84	DEAH-box helicase 38	protein-coding
10_siC_WDR5_peak_13047	chr7	4681456	4682119	+	914	NA	Intergenic	CpG	-40139	NM_001037165	221937	Hs.487393	NM_001037165	ENSG00000164916	FOXK1	FOXK1L	forkhead box K1	protein-coding
10_siC_WDR5_peak_2000	chr10	102747007	102747561	+	913	NA	promoter-TSS (NM_176794)	promoter-TSS (NM_176794)	-12	NM_176794	84545	Hs.421848	NM_032112	ENSG00000055950	MRPL43	L43mt|MRP-L43|bMRP36a	mitochondrial ribosomal protein L43	protein-coding
10_siC_WDR5_peak_9329	chr20	44600111	44601119	+	913	NA	intron (NM_022095, intron 1 of 27)	CpG-16708	227	NM_022095	63925	Hs.174193	NM_022095	ENSG00000198026	ZNF335	MCPH10|NIF-1|NIF1|NIF2	zinc finger protein 335	protein-coding
10_siC_WDR5_peak_3971	chr13	46355534	46356450	+	913	NA	3' UTR (NM_198849, exon 2 of 2)	3' UTR (NM_198849, exon 2 of 2)	69896	NM_198849	283514	Hs.368483	NM_198849	ENSG00000215475	SIAH3	-	siah E3 ubiquitin protein ligase family member 3	protein-coding
10_siC_WDR5_peak_8176	chr2	54013883	54014495	+	910	NA	promoter-TSS (NM_016115)	promoter-TSS (NM_016115)	8	NM_015701	27248	Hs.438336	NM_015701	ENSG00000068912	ERLEC1	C2orf30|CIM|CL24936|CL25084|HEL117|XTP3-B|XTP3TPB	endoplasmic reticulum lectin 1	protein-coding
10_siC_WDR5_peak_6735	chr17	80170502	80171346	+	910	NA	promoter-TSS (NM_198082)	promoter-TSS (NM_198082)	-206	NM_198082	284001	Hs.631724	NM_152675	ENSG00000176155	CCDC57	-	coiled-coil domain containing 57	protein-coding
10_siC_WDR5_peak_808	chr1	150487632	150488137	+	910	NA	promoter-TSS (NR_051960)	promoter-TSS (NR_051960)	-349	NR_051960	100874054	Hs.576460	NR_051960	ENSG00000228126	FALEC	FAL1|LINC00568|ncRNA-a1	focally amplified long non-coding RNA in epithelial cancer	ncRNA
10_siC_WDR5_peak_7235	chr19	12780076	12780972	+	910	NA	promoter-TSS (NM_032332)	promoter-TSS (NM_032332)	-43	NM_032332	84292	Hs.657204	NM_032332	ENSG00000123154	WDR83	MORG1	WD repeat domain 83	protein-coding
10_siC_WDR5_peak_6438	chr17	59222440	59222931	+	909	NA	intron (NM_001353146, intron 23 of 25)	intron (NM_001353146, intron 23 of 25)	222380	NR_136397	101927855	Hs.662123	NR_136397	ENSG00000267131	LOC101927855	-	uncharacterized LOC101927855	ncRNA
10_siC_WDR5_peak_6551	chr17	71114850	71115772	+	909	NA	Intergenic	Intergenic	-26484	NM_001352691	201266	Hs.221127	NM_139177	ENSG00000133195	SLC39A11	C17orf26|ZIP-11|ZIP11	solute carrier family 39 member 11	protein-coding
10_siC_WDR5_peak_11549	chr5	74062744	74063464	+	909	NA	promoter-TSS (NM_001364506)	promoter-TSS (NM_001364506)	30	NR_157206	10412	Hs.482526	NM_014886	ENSG00000164346	NSA2	CDK105|HCL-G1|HCLG1|HUSSY-29|HUSSY29|TINP1	NSA2 ribosome biogenesis factor	protein-coding
10_siC_WDR5_peak_13232	chr7	35292983	35294011	+	909	NA	5' UTR (NM_001077653, exon 1 of 8)	5' UTR (NM_001077653, exon 1 of 8)	214	NM_001166220	57057	Hs.404167	NM_020417	ENSG00000164532	TBX20	ASD4	T-box transcription factor 20	protein-coding
10_siC_WDR5_peak_8361	chr2	75303246	75303843	+	908	NA	intron (NM_015727, intron 2 of 3)	intron (NM_015727, intron 2 of 3)	-14395	NR_049796	100846995		NR_049796	ENSG00000263909	MIR5000	-	microRNA 5000	ncRNA
10_siC_WDR5_peak_11655	chr5	110427677	110428447	+	907	NA	exon (NM_139281, exon 1 of 23)	exon (NM_139281, exon 1 of 23)	192	NM_139281	134430	Hs.533237	NM_139281	ENSG00000134987	WDR36	GLC1G|TA-WDRP|TAWDRP|UTP21	WD repeat domain 36	protein-coding
10_siC_WDR5_peak_7548	chr19	42748631	42749165	+	907	NA	Intergenic	Intergenic	-2144	NM_019884	2931	Hs.466828	NM_019884	ENSG00000105723	GSK3A	-	glycogen synthase kinase 3 alpha	protein-coding
10_siC_WDR5_peak_7368	chr19	21324595	21325200	+	906	NA	promoter-TSS (NR_138052)	promoter-TSS (NR_138052)	54	NR_138053	170959	Hs.156256	NM_133473	ENSG00000196705	ZNF431	-	zinc finger protein 431	protein-coding
10_siC_WDR5_peak_12314	chr6	31126014	31126723	+	906	NA	promoter-TSS (NM_019052).2	promoter-TSS (NM_019052).2	2	NM_007109	6941	Hs.584807	NM_007109	ENSG00000137310	TCF19	SC1|TCF-19	transcription factor 19	protein-coding
10_siC_WDR5_peak_2342	chr11	28131683	28132060	+	906	NA	5' UTR (NM_152636, exon 2 of 8)	5' UTR (NM_152636, exon 2 of 8)	1936	NM_001113528	196074	Hs.243326	NM_152636	ENSG00000169519	METTL15	METT5D1	methyltransferase like 15	protein-coding
10_siC_WDR5_peak_10310	chr3	96951463	96951949	+	906	NA	intron (NM_001080448, intron 4 of 17)	MER50|LTR|ERV1	-206745	NM_001278300	285220	Hs.272208	NM_173655	ENSG00000080224	EPHA6	EHK-2|EHK2|EK12|EPA6|HEK12|PRO57066	EPH receptor A6	protein-coding
10_siC_WDR5_peak_5613	chr16	58426126	58426922	+	904	NA	exon (NM_001126130, exon 1 of 2)	exon (NM_001126130, exon 1 of 2)	149	NM_001126130	64785	Hs.47125	NM_022770	ENSG00000181938	GINS3	PSF3	GINS complex subunit 3	protein-coding
10_siC_WDR5_peak_9840	chr22	42718175	42718578	+	902	NA	Intergenic	Intergenic	-38443	NM_005650	6942	Hs.475018	NM_005650	ENSG00000100207	TCF20	AR1|DDVIBA|SPBP|TCF-20	transcription factor 20	protein-coding
10_siC_WDR5_peak_7663	chr19	49479392	49479791	+	902	NA	intron (NR_027763, intron 9 of 14)	intron (NR_027763, intron 9 of 14)	11025	NM_000146	2512	Hs.433670	NM_000146	ENSG00000087086	FTL	LFTD|NBIA3	ferritin light chain	protein-coding
10_siC_WDR5_peak_9162	chr20	18547344	18548420	+	902	NA	promoter-TSS (NM_001348957)	promoter-TSS (NM_001348957)	-182	NM_001348957	388789	Hs.349092	NM_001348957	ENSG00000232388	SMIM26	LINC00493	small integral membrane protein 26	protein-coding
10_siC_WDR5_peak_9279	chr20	36661288	36662519	+	901	NA	promoter-TSS (NM_014657)	promoter-TSS (NM_014657)	-45	NM_001303457	9675	Hs.655481	NM_014657	ENSG00000101407	TTI1	KIAA0406|smg-10	TELO2 interacting protein 1	protein-coding
10_siC_WDR5_peak_2603	chr11	67250469	67251103	+	900	NA	promoter-TSS (NM_001302959)	promoter-TSS (NM_001302959)	-201	NM_001302959	9049	Hs.412433	NM_003977	ENSG00000110711	AIP	ARA9|FKBP16|FKBP37|PITA1|SMTPHN|XAP-2|XAP2	aryl hydrocarbon receptor interacting protein	protein-coding
10_siC_WDR5_peak_5242	chr16	838106	838886	+	899	NA	promoter-TSS (NM_001324411)	promoter-TSS (NM_001324411)	-115	NM_058192	113000	Hs.101742	NM_058192	ENSG00000007376	RPUSD1	C16orf40|RLUCL	RNA pseudouridine synthase domain containing 1	protein-coding
10_siC_WDR5_peak_4512	chr14	91790749	91791141	+	899	NA	intron (NM_001080414, intron 12 of 29)	intron (NM_001080414, intron 12 of 29)	-70721	NM_001348437	8111	Hs.8882	NM_003485	ENSG00000119714	GPR68	AI2A6|GPR12A|OGR1	G protein-coupled receptor 68	protein-coding
10_siC_WDR5_peak_8704	chr2	174829081	174830771	+	899	NA	5' UTR (NM_003111, exon 1 of 7)	5' UTR (NM_003111, exon 1 of 7)	504	NM_001172712	6670	Hs.531587	NM_003111	ENSG00000172845	SP3	SPR2	Sp3 transcription factor	protein-coding
10_siC_WDR5_peak_7736	chr19	54618544	54619307	+	899	NA	promoter-TSS (NM_015629)	promoter-TSS (NM_015629)	130	NM_013342	29844	Hs.590939	NM_013342	ENSG00000105619	TFPT	FB1|INO80F|amida	TCF3 fusion partner	protein-coding
10_siC_WDR5_peak_2438	chr11	47600314	47600841	+	899	NA	promoter-TSS (NM_001318716)	promoter-TSS (NM_001318716)	-10	NM_001318718	55709	Hs.718483	NM_016506	ENSG00000123444	KBTBD4	BKLHD4|HSPC252	kelch repeat and BTB domain containing 4	protein-coding
10_siC_WDR5_peak_8224	chr2	61765241	61766515	+	899	NA	promoter-TSS (NM_003400)	promoter-TSS (NM_003400)	-387	NM_003400	7514	Hs.370770	NM_003400	ENSG00000082898	XPO1	CRM-1|CRM1|emb|exp1	exportin 1	protein-coding
10_siC_WDR5_peak_529	chr1	84944738	84945410	+	899	NA	exon (NM_025065, exon 1 of 9)	exon (NM_025065, exon 1 of 9)	125	NM_025065	80135	Hs.481202	NM_025065	ENSG00000117133	RPF1	BXDC5	ribosome production factor 1 homolog	protein-coding
10_siC_WDR5_peak_7608	chr19	46365688	46366717	+	898	NA	intron (NM_004819, intron 1 of 26)	CpG	203	NM_004819	8189	Hs.515475	NM_004819	ENSG00000125755	SYMPK	SPK|SYM	symplekin	protein-coding
10_siC_WDR5_peak_10196	chr3	53381352	53381875	+	898	NA	promoter-TSS (NM_001290206)	promoter-TSS (NM_001290206)	-43	NM_001290204	55802	Hs.476353	NM_018403	ENSG00000272886	DCP1A	HSA275986|Nbla00360|SMAD4IP1|SMIF	decapping mRNA 1A	protein-coding
10_siC_WDR5_peak_13986	chr8	21999311	21999790	+	898	NA	promoter-TSS (NM_025232)	promoter-TSS (NM_025232)	-130	NM_001316965	80346	Hs.289063	NM_025232	ENSG00000168476	REEP4	C8orf20|PP432|Yip2c	receptor accessory protein 4	protein-coding
10_siC_WDR5_peak_7875	chr2	5549953	5550444	+	898	NA	Intergenic	Intergenic	281052	NR_110580	102723818	Hs.128107	NR_110580		LINC01248	-	long intergenic non-protein coding RNA 1248	ncRNA
10_siC_WDR5_peak_233	chr1	39325175	39325969	+	897	NA	promoter-TSS (NM_022157)	promoter-TSS (NM_022157)	-128	NM_022157	64121	Hs.532461	NM_022157	ENSG00000116954	RRAGC	GTR2|RAGC|TIB929	Ras related GTP binding C	protein-coding
10_siC_WDR5_peak_957	chr1	160369449	160370808	+	897	NA	promoter-TSS (NM_020335)	promoter-TSS (NM_020335)	-226	NM_020335	57216	Hs.99477	NM_020335	ENSG00000162738	VANGL2	LPP1|LTAP|STB1|STBM|STBM1	VANGL planar cell polarity protein 2	protein-coding
10_siC_WDR5_peak_6616	chr17	73851151	73852169	+	897	NA	promoter-TSS (NM_001330499)	promoter-TSS (NM_001330499)	-244	NM_012478	23558	Hs.514489	NM_012478	ENSG00000132471	WBP2	DFNB107|GRAMD6|WBP-2	WW domain binding protein 2	protein-coding
10_siC_WDR5_peak_13517	chr7	92157532	92158358	+	897	NA	promoter-TSS (NM_001282677)	promoter-TSS (NM_001282677)	-111	NM_000466	5189	Hs.164682	NM_000466	ENSG00000127980	PEX1	HMLR1|PBD1A|PBD1B|ZWS|ZWS1	peroxisomal biogenesis factor 1	protein-coding
10_siC_WDR5_peak_10885	chr4	41936968	41937637	+	897	NA	promoter-TSS (NM_018126)	promoter-TSS (NM_018126)	-144	NM_018126	55161	Hs.31082	NM_018126	ENSG00000109133	TMEM33	1600019D15Rik|Pom33|SHINC-3|SHINC3	transmembrane protein 33	protein-coding
10_siC_WDR5_peak_5682	chr16	71842571	71843103	+	897	NA	promoter-TSS (NM_001030007)	promoter-TSS (NM_001030007)	-100	NM_001030007	164	Hs.461253	NM_001128	ENSG00000166747	AP1G1	ADTG|CLAPG1	adaptor related protein complex 1 subunit gamma 1	protein-coding
10_siC_WDR5_peak_2478	chr11	61559863	61560642	+	897	NA	promoter-TSS (NM_014206)	promoter-TSS (NM_014206)	-131	NM_004111	2237	Hs.409065	NM_004111	ENSG00000168496	FEN1	FEN-1|MF1|RAD2	flap structure-specific endonuclease 1	protein-coding
10_siC_WDR5_peak_2796	chr11	112884966	112885308	+	896	NA	intron (NM_181351, intron 2 of 19)	intron (NM_181351, intron 2 of 19)	-50955	NR_120563	101928847	Hs.711235	NR_120563	ENSG00000247416	LOC101928847	-	uncharacterized LOC101928847	ncRNA
10_siC_WDR5_peak_13697	chr7	128864258	128864802	+	893	NA	promoter-TSS (NM_015328)	promoter-TSS (NM_015328)	-341	NM_015328	23382	Hs.600789	NM_015328	ENSG00000158467	AHCYL2	ADOHCYASE3|IRBIT2	adenosylhomocysteinase like 2	protein-coding
10_siC_WDR5_peak_4773	chr15	49447371	49448196	+	893	NA	promoter-TSS (NM_001001556)	promoter-TSS (NM_001001556)	13	NM_001143887	9318	Hs.369614	NM_004236	ENSG00000166200	COPS2	ALIEN|CSN2|SGN2|TRIP15	COP9 signalosome subunit 2	protein-coding
10_siC_WDR5_peak_3001	chr12	9066715	9067489	+	893	NA	promoter-TSS (NM_004426)	promoter-TSS (NM_004426)	-3	NM_004426	1911	Hs.744902	NM_004426	ENSG00000111752	PHC1	EDR1|HPH1|MCPH11|RAE28	polyhomeotic homolog 1	protein-coding
10_siC_WDR5_peak_857	chr1	154599905	154600760	+	892	NA	5' UTR (NM_001025107, exon 1 of 15)	5' UTR (NM_001025107, exon 1 of 15)	115	NM_001025107	103	Hs.12341	NM_001111	ENSG00000160710	ADAR	ADAR1|AGS6|DRADA|DSH|DSRAD|G1P1|IFI-4|IFI4|K88DSRBP|P136	adenosine deaminase RNA specific	protein-coding
10_siC_WDR5_peak_9075	chr20	1098917	1099490	+	892	NA	promoter-TSS (NM_001323408)	promoter-TSS (NM_001323408)	-42	NM_006814	9491	Hs.471917	NM_006814	ENSG00000125818	PSMF1	PI31	proteasome inhibitor subunit 1	protein-coding
10_siC_WDR5_peak_198	chr1	33937887	33938471	+	892	NA	promoter-TSS (NM_145238)	promoter-TSS (NM_145238)	-67	NM_145238	7579	Hs.442705	NM_145238	ENSG00000121903	ZSCAN20	KOX29|ZFP-31|ZNF31|ZNF360	zinc finger and SCAN domain containing 20	protein-coding
10_siC_WDR5_peak_6305	chr17	48450246	48450931	+	891	NA	promoter-TSS (NM_152463)	promoter-TSS (NM_152463)	-2	NM_152463	146956	Hs.514330	NM_152463	ENSG00000154920	EME1	MMS4L|SLX2A	essential meiotic structure-specific endonuclease 1	protein-coding
10_siC_WDR5_peak_5391	chr16	19078706	19079513	+	891	NA	promoter-TSS (NR_119382)	promoter-TSS (NR_119382)	64	NM_001370494	10229	Hs.157113	NM_016138	ENSG00000167186	COQ7	CAT5|CLK-1|CLK1|COQ10D8	coenzyme Q7, hydroxylase	protein-coding
10_siC_WDR5_peak_10342	chr3	105587669	105588316	+	891	NA	promoter-TSS (NR_135812)	promoter-TSS (NR_135812)	-136	NM_001321806	868	Hs.430589	NM_170662	ENSG00000114423	CBLB	Cbl-b|Nbla00127|RNF56	Cbl proto-oncogene B	protein-coding
10_siC_WDR5_peak_7540	chr19	42363610	42364702	+	891	NA	promoter-TSS (NM_001022)	promoter-TSS (NM_001022)	-169	NM_001022	6223	Hs.438429	NM_001022	ENSG00000105372	RPS19	DBA|DBA1|S19|eS19	ribosomal protein S19	protein-coding
10_siC_WDR5_peak_7926	chr2	13756377	13757178	+	891	NA	Intergenic	MLT1A1|LTR|ERVL-MaLR	-609639	NR_038434	100506474	Hs.242196	NR_038434	ENSG00000225649	LOC100506474	-	uncharacterized LOC100506474	ncRNA
10_siC_WDR5_peak_3036	chr12	14956026	14956856	+	891	NA	promoter-TSS (NM_016312)	promoter-TSS (NM_016312)	-29	NM_016312	51729	Hs.655138	NM_016312	ENSG00000084463	WBP11	NPWBP|PPP1R165|SIPP1|WBP-11	WW domain binding protein 11	protein-coding
10_siC_WDR5_peak_349	chr1	54518665	54519589	+	891	NA	promoter-TSS (NR_039942)	promoter-TSS (NR_039942)	-16	NM_001305066	9528	Hs.118947	NM_004872	ENSG00000116209	TMEM59	C1orf8|DCF1|HSPC001|PRO195|UNQ169	transmembrane protein 59	protein-coding
10_siC_WDR5_peak_13090	chr7	6865539	6866220	+	890	NA	promoter-TSS (NM_198097)	promoter-TSS (NM_198097)	47	NM_198097	221960	Hs.567779	NM_198097	ENSG00000146574	CCZ1B	C7orf28A|C7orf28B|CCZ1|H_NH0577018.2	CCZ1 homolog B, vacuolar protein trafficking and biogenesis associated	protein-coding
10_siC_WDR5_peak_738	chr1	119682784	119683498	+	890	NA	non-coding (NR_125977, exon 1 of 4)	non-coding (NR_125977, exon 1 of 4)	122	NR_125977	101929147	Hs.697821	NR_125974	ENSG00000231365	WARS2-AS1	-	WARS2 antisense RNA 1	ncRNA
10_siC_WDR5_peak_1345	chr1	221631467	221632009	+	889	NA	Intergenic	Intergenic	-122100	NR_024236	400804	Hs.722626	NR_024236	ENSG00000234754	C1orf140	-	uncharacterized LOC400804	ncRNA
10_siC_WDR5_peak_1144	chr1	197643371	197643709	+	889	NA	intron (NM_144977, intron 3 of 15)	intron (NM_144977, intron 3 of 15)	101070	NM_001195215	163486	Hs.125056	NM_019049	ENSG00000213047	DENND1B	C1ORF18|C1orf218|FAM31B	DENN domain containing 1B	protein-coding
10_siC_WDR5_peak_4199	chr14	24610127	24611273	+	889	NA	promoter-TSS (NM_001346875)	promoter-TSS (NM_001346875)	100	NM_001346876	51016	Hs.271614	NM_016049	ENSG00000100908	EMC9	C14orf122|CGI-112|FAM158A	ER membrane protein complex subunit 9	protein-coding
10_siC_WDR5_peak_5225	chr16	420328	420740	+	889	NA	promoter-TSS (NM_006428)	promoter-TSS (NM_006428)	4	NM_006428	10573	Hs.513230	NM_006428	ENSG00000086504	MRPL28	MAAT1|p15	mitochondrial ribosomal protein L28	protein-coding
10_siC_WDR5_peak_2576	chr11	65769375	65770236	+	887	NA	promoter-TSS (NM_032325)	promoter-TSS (NM_032325)	-169	NM_003860	8815	Hs.433759	NM_003860	ENSG00000175334	BANF1	BAF|BCRP1|D14S1460|NGPS	barrier to autointegration factor 1	protein-coding
10_siC_WDR5_peak_8249	chr2	64978006	64978817	+	887	NA	Intergenic	CpG	-97364	NM_014755	9792	Hs.591569	NM_014755	ENSG00000179833	SERTAD2	Sei-2|TRIP-Br2|TRIPBR2	SERTA domain containing 2	protein-coding
10_siC_WDR5_peak_366	chr1	55181316	55181897	+	887	NA	promoter-TSS (NM_004623)	promoter-TSS (NM_004623)	72	NM_004623	7268	Hs.412482	NM_004623	ENSG00000243725	TTC4	CNS1	tetratricopeptide repeat domain 4	protein-coding
10_siC_WDR5_peak_13689	chr7	128170943	128172157	+	887	NA	Intergenic	CpG	54767	NM_018396	55798	Hs.433213	NM_018396	ENSG00000165055	METTL2B	METL|METTL2|METTL2A|PSENIP1	methyltransferase like 2B	protein-coding
10_siC_WDR5_peak_12852	chr6	139094395	139095196	+	887	NA	promoter-TSS (NR_161203)	promoter-TSS (NR_161203)	45	NR_161203	100507462	Hs.571054	NM_001242740	ENSG00000279968	GVQW2	-	GVQW motif containing 2	ncRNA
10_siC_WDR5_peak_1592	chr10	13389133	13390113	+	885	NA	intron (NM_012247, intron 1 of 8)	intron (NM_012247, intron 1 of 8)	670	NM_012247	22929	Hs.124027	NM_012247	ENSG00000086475	SEPHS1	SELD|SPS|SPS1	selenophosphate synthetase 1	protein-coding
10_siC_WDR5_peak_6422	chr17	57287112	57287703	+	885	NA	promoter-TSS (NM_018149)	promoter-TSS (NM_018149)	36	NM_018149	55181	Hs.7296	NM_018149	ENSG00000167447	SMG8	C17orf71	SMG8 nonsense mediated mRNA decay factor	protein-coding
10_siC_WDR5_peak_13756	chr7	135821643	135822116	+	884	NA	Intergenic	Intergenic	-159772	NM_001128619	767558	Hs.602015	NM_001128619	ENSG00000267697	LUZP6	MPD6|MTPNUT	leucine zipper protein 6	protein-coding
10_siC_WDR5_peak_11857	chr5	149379514	149380669	+	882	NA	promoter-TSS (NM_014983)	promoter-TSS (NM_014983)	126	NM_030953	81789	Hs.169333	NM_030953	ENSG00000164296	TIGD6	-	tigger transposable element derived 6	protein-coding
10_siC_WDR5_peak_1422	chr1	229829865	229830490	+	882	NA	Intergenic	Intergenic	68183	NM_014777	9816	Hs.533628	NM_014777	ENSG00000135763	URB2	KIAA0133|NET10|NPA2	URB2 ribosome biogenesis homolog	protein-coding
10_siC_WDR5_peak_14631	chr9	35102500	35103475	+	881	NA	intron (NM_001287032, intron 1 of 9)	CpG	141	NM_013442	30968	Hs.3439	NM_013442	ENSG00000165283	STOML2	HSPC108|SLP-2	stomatin like 2	protein-coding
10_siC_WDR5_peak_7728	chr19	53696053	53696675	+	881	NA	intron (NM_001353458, intron 1 of 4)	CpG	247	NM_001353459	79788	Hs.745230	NM_024733	ENSG00000197497	ZNF665	ZFP160L	zinc finger protein 665	protein-coding
10_siC_WDR5_peak_12375	chr6	34724466	34725616	+	880	NA	promoter-TSS (NM_003093)	promoter-TSS (NM_003093)	170	NR_029472	6631	Hs.1063	NM_003093	ENSG00000124562	SNRPC	U1C|Yhc1	small nuclear ribonucleoprotein polypeptide C	protein-coding
10_siC_WDR5_peak_4014	chr13	52586164	52586758	+	880	NA	promoter-TSS (NM_001330578)	promoter-TSS (NM_001330578)	-73	NM_001004127	440138	Hs.512963	NM_001004127	ENSG00000253710	ALG11	CDG1P|GT8	ALG11 alpha-1,2-mannosyltransferase	protein-coding
10_siC_WDR5_peak_5266	chr16	2059517	2060284	+	880	NA	promoter-TSS (NM_178167)	promoter-TSS (NM_178167)	-78	NM_178167	90850	Hs.343828	NM_178167	ENSG00000167962	ZNF598	HEL2	zinc finger protein 598	protein-coding
10_siC_WDR5_peak_14400	chr8	126103710	126104377	+	880	NA	promoter-TSS (NM_014846)	promoter-TSS (NM_014846)	-9	NM_014846	9897	Hs.270043	NM_014846	ENSG00000164961	WASHC5	KIAA0196|RTSC|RTSC1|SPG8	WASH complex subunit 5	protein-coding
10_siC_WDR5_peak_1551	chr10	1033972	1034838	+	880	NA	promoter-TSS (NM_012341)	promoter-TSS (NM_012341)	31	NM_012341	23560	Hs.215766	NM_012341	ENSG00000107937	GTPBP4	CRFG|NGB|NOG1	GTP binding protein 4	protein-coding
10_siC_WDR5_peak_9713	chr22	29137604	29138595	+	878	NA	promoter-TSS (NM_001349956)	promoter-TSS (NM_001349956)	72	NM_172002	150274	Hs.632780	NM_172002	ENSG00000100209	HSCB	DNAJC20|HSC20|JAC1	HscB mitochondrial iron-sulfur cluster cochaperone	protein-coding
10_siC_WDR5_peak_12766	chr6	116892073	116892994	+	878	NA	promoter-TSS (NM_015952)	promoter-TSS (NM_015952)	-134	NM_016104	51389	Hs.532164	NM_015952	ENSG00000111832	RWDD1	CGI-24|PTD013	RWD domain containing 1	protein-coding
10_siC_WDR5_peak_6624	chr17	74260975	74261451	+	878	NA	promoter-TSS (NM_182565)	promoter-TSS (NM_182565)	-216	NM_182565	283991	Hs.744981	NM_182565	ENSG00000185262	UBALD2	FAM100B	UBA like domain containing 2	protein-coding
10_siC_WDR5_peak_8563	chr2	128820694	128821126	+	878	NA	Intergenic	Intergenic	-27864	NM_020120	56886	Hs.743306	NM_020120	ENSG00000136731	UGGT1	HUGT1|UGCGL1|UGT1	UDP-glucose glycoprotein glucosyltransferase 1	protein-coding
10_siC_WDR5_peak_3216	chr12	50381566	50382000	+	877	NA	Intergenic	Intergenic	15053	NM_001652	363	Hs.54505	NM_001652	ENSG00000086159	AQP6	AQP2L|KID	aquaporin 6	protein-coding
10_siC_WDR5_peak_13794	chr7	141437711	141438406	+	877	NA	promoter-TSS (NM_001256513)	promoter-TSS (NM_001256513)	-28	NR_015392	285962	Hs.17589	NM_173677	ENSG00000228775	WEE2-AS1	-	WEE2 antisense RNA 1	ncRNA
10_siC_WDR5_peak_7085	chr19	3094100	3094452	+	877	NA	promoter-TSS (NM_002067)	promoter-TSS (NM_002067)	-84	NM_002067	2767	Hs.650575	NM_002067	ENSG00000088256	GNA11	FBH|FBH2|FHH2|GNA-11|HHC2|HYPOC2	G protein subunit alpha 11	protein-coding
10_siC_WDR5_peak_6240	chr17	44656543	44657632	+	877	NA	promoter-TSS (NM_001288812)	promoter-TSS (NM_001288812)	1	NM_001288812	51326	Hs.559259	NM_016632	ENSG00000185829	ARL17A	ARF1P2|ARL17P1	ADP ribosylation factor like GTPase 17A	protein-coding
10_siC_WDR5_peak_3717	chr12	121837473	121838073	+	877	NA	promoter-TSS (NM_025126)	promoter-TSS (NM_025126)	-113	NM_025126	80196	Hs.292804	NM_025126	ENSG00000170633	RNF34	CARP-1|CARP1|RFI|RIF|RIFF|hRFI	ring finger protein 34	protein-coding
10_siC_WDR5_peak_4446	chr14	76584090	76584636	+	876	NA	Intergenic	Intergenic	-33865	NM_001322031	55668	Hs.410231	NM_017926	ENSG00000089916	GPATCH2L	C14orf118	G-patch domain containing 2 like	protein-coding
10_siC_WDR5_peak_5484	chr16	29984432	29984895	+	876	NA	promoter-TSS (NM_001252043)	promoter-TSS (NM_001252043)	-526	NM_004783	9344	Hs.291623	NM_004783	ENSG00000149930	TAOK2	MAP3K17|PSK|PSK1|PSK1-BETA|TAO1|TAO2	TAO kinase 2	protein-coding
10_siC_WDR5_peak_8585	chr2	133843167	133843568	+	876	NA	intron (NM_207363, intron 6 of 19)	intron (NM_207363, intron 6 of 19)	170237	NR_135572	101928185	Hs.680114	NR_135572	ENSG00000233729	NCKAP5-AS1	-	NCKAP5 antisense RNA 1	ncRNA
10_siC_WDR5_peak_5256	chr16	1755774	1756348	+	876	NA	promoter-TSS (NM_015133)	promoter-TSS (NM_015133)	-123	NM_001318852	23162	Hs.207763	NM_015133	ENSG00000138834	MAPK8IP3	JIP-3|JIP3|JSAP1|NEDBA|SYD2|syd	mitogen-activated protein kinase 8 interacting protein 3	protein-coding
10_siC_WDR5_peak_12051	chr5	179498948	179499481	+	876	NA	promoter-TSS (NM_001280801)	promoter-TSS (NM_001280801)	-455	NM_001280801	55819	Hs.484363	NM_018434	ENSG00000113269	RNF130	G1RZFP|GOLIATH|GP	ring finger protein 130	protein-coding
10_siC_WDR5_peak_5668	chr16	69795888	69796691	+	876	NA	promoter-TSS (NM_007014)	promoter-TSS (NM_007014)	54	NM_001270454	11060	Hs.408458	NM_007014	ENSG00000198373	WWP2	AIP2|WWp2-like	WW domain containing E3 ubiquitin protein ligase 2	protein-coding
10_siC_WDR5_peak_12632	chr6	91605839	91606199	+	876	NA	Intergenic	Intergenic	-309228	NM_003188	6885	Hs.594838	NM_003188	ENSG00000135341	MAP3K7	CSCF|FMD2|MEKK7|TAK1|TGF1a	mitogen-activated protein kinase kinase kinase 7	protein-coding
10_siC_WDR5_peak_13300	chr7	44924480	44925498	+	875	NA	5' UTR (NM_033224, exon 1 of 1)	5' UTR (NM_033224, exon 1 of 1)	140	NM_033224	5814	Hs.349150	NM_033224	ENSG00000146676	PURB	PURBETA	purine rich element binding protein B	protein-coding
10_siC_WDR5_peak_747	chr1	143912849	143914127	+	875	NA	promoter-TSS (NM_001346070)	promoter-TSS (NM_001346070)	-319	NM_207418	728833	Hs.535577	NM_207418	ENSG00000215784	FAM72D	GCUD2	family with sequence similarity 72 member D	protein-coding
10_siC_WDR5_peak_1	chr1	28912	29575	+	875	NA	intron (NR_024540, intron 1 of 10)	CpG	127	NR_024540	653635	Hs.446466	NR_024540		WASH7P	FAM39F|WASH5P	WASP family homolog 7, pseudogene	pseudo
10_siC_WDR5_peak_7786	chr19	57946356	57946813	+	874	NA	promoter-TSS (NM_001321954)	promoter-TSS (NM_001321954)	-109	NM_001321954	388567	Hs.467358	NM_001023561	ENSG00000186230	ZNF749	-	zinc finger protein 749	protein-coding
10_siC_WDR5_peak_14923	chr9	116172367	116173119	+	874	NA	promoter-TSS (NM_001278629)	promoter-TSS (NM_001278629)	212	NM_017443	54107	Hs.108112	NM_017443	ENSG00000148229	POLE3	CHARAC17|CHRAC17|CHRAC2|YBL1|p17	DNA polymerase epsilon 3, accessory subunit	protein-coding
10_siC_WDR5_peak_7097	chr19	3970900	3971483	+	874	NA	promoter-TSS (NM_001348)	promoter-TSS (NM_001348)	-94	NM_001348	1613	Hs.631844	NM_001348	ENSG00000167657	DAPK3	DLK|ZIP|ZIPK	death associated protein kinase 3	protein-coding
10_siC_WDR5_peak_8365	chr2	76894944	76895284	+	873	NA	Intergenic	Intergenic	-317977	NR_110284	101927907	Hs.382185	NR_110284	ENSG00000234653	LOC101927907	-	uncharacterized LOC101927907	ncRNA
10_siC_WDR5_peak_5559	chr16	49598640	49599221	+	872	NA	intron (NM_001330533, intron 3 of 5)	intron (NM_001330533, intron 3 of 5)	-46434	NR_144553	1596	Hs.684517	NR_144553	ENSG00000260089	ADAM3B	CYRN2	ADAM metallopeptidase domain 3B (pseudogene)	pseudo
10_siC_WDR5_peak_8410	chr2	86422014	86423157	+	872	NA	5' UTR (NM_001100169, exon 1 of 15)	5' UTR (NM_001100169, exon 1 of 15)	308	NM_001100169	10989	Hs.148559	NM_006839	ENSG00000132305	IMMT	HMP|MICOS60|MINOS2|Mic60|P87|P87/89|P89|PIG4|PIG52	inner membrane mitochondrial protein	protein-coding
10_siC_WDR5_peak_9056	chr2	242447606	242448640	+	870	NA	promoter-TSS (NM_006374)	promoter-TSS (NM_006374)	-13	NM_001282307	10494	Hs.516807	NM_006374	ENSG00000115694	STK25	SOK1|YSK1	serine/threonine kinase 25	protein-coding
10_siC_WDR5_peak_2387	chr11	43380179	43380963	+	870	NA	exon (NM_018259, exon 1 of 24)	exon (NM_018259, exon 1 of 24)	101	NM_018259	55761	Hs.191186	NM_018259	ENSG00000052841	TTC17	-	tetratricopeptide repeat domain 17	protein-coding
10_siC_WDR5_peak_14712	chr9	73028666	73029397	+	868	NA	5' UTR (NM_001206, exon 1 of 2)	5' UTR (NM_001206, exon 1 of 2)	542	NM_001206	687	Hs.150557	NM_001206	ENSG00000119138	KLF9	BTEB|BTEB1	Kruppel like factor 9	protein-coding
10_siC_WDR5_peak_9538	chr21	35987111	35987903	+	868	NA	promoter-TSS (NM_004414)	promoter-TSS (NM_004414)	-95	NM_004414	1827	Hs.282326	NM_004414	ENSG00000159200	RCAN1	ADAPT78|CSP1|DSC1|DSCR1|MCIP1|RCN1	regulator of calcineurin 1	protein-coding
10_siC_WDR5_peak_14039	chr8	28747207	28748330	+	868	NA	promoter-TSS (NM_001324387)	promoter-TSS (NM_001324387)	-70	NR_026826	55756	Hs.162397	NM_018250	ENSG00000104299	INTS9	CPSF2L|INT9|RC74	integrator complex subunit 9	protein-coding
10_siC_WDR5_peak_8673	chr2	169746651	169747188	+	868	NA	promoter-TSS (NM_020675)	promoter-TSS (NM_020675)	21	NM_020675	57405	Hs.421956	NM_020675	ENSG00000152253	SPC25	AD024|SPBC25|hSpc25	SPC25 component of NDC80 kinetochore complex	protein-coding
10_siC_WDR5_peak_2580	chr11	66056304	66057014	+	868	NA	promoter-TSS (NM_020470)	promoter-TSS (NM_020470)	-45	NM_020470	10897	Hs.446445	NM_020470	ENSG00000174851	YIF1A	54TM|FinGER7|YIF1|YIF1P	Yip1 interacting factor homolog A, membrane trafficking protein	protein-coding
10_siC_WDR5_peak_10060	chr3	38066101	38066508	+	867	NA	promoter-TSS (NM_001130964)	promoter-TSS (NM_001130964)	-293	NR_024071	5333	Hs.80776	NM_006225	ENSG00000187091	PLCD1	NDNC3|PLC-III	phospholipase C delta 1	protein-coding
10_siC_WDR5_peak_2927	chr12	74008	74750	+	867	NA	intron (NR_130745, intron 1 of 10)	CpG	654	NR_130745	100288778	Hs.459573	NR_130745	ENSG00000226210	WASH8P	-	WAS protein family homolog 8, pseudogene	pseudo
10_siC_WDR5_peak_8318	chr2	73297866	73299046	+	867	NA	promoter-TSS (NM_001330403)	promoter-TSS (NM_001330403)	-3	NM_001330404	94097	Hs.368171	NM_144579	ENSG00000144040	SFXN5	BBG-TCC|SLC56A5	sideroflexin 5	protein-coding
10_siC_WDR5_peak_10123	chr3	47554611	47555447	+	867	NA	promoter-TSS (NM_001363957)	promoter-TSS (NM_001363957)	173	NM_001031703	54859	Hs.311100	NM_017713	ENSG00000163832	ELP6	C3orf75|TMEM103	elongator acetyltransferase complex subunit 6	protein-coding
10_siC_WDR5_peak_2175	chr10	131908766	131909864	+	866	NA	promoter-TSS (NR_034125)	promoter-TSS (NR_034125)	-221	NM_001355042	387723	Hs.127394	NM_001355042	ENSG00000237489	C10orf143	LINC00959	chromosome 10 open reading frame 143	protein-coding
10_siC_WDR5_peak_9851	chr22	43253342	43253940	+	866	NA	promoter-TSS (NM_014570)	promoter-TSS (NM_014570)	-362	NM_001142293	26286	Hs.685225	NM_014570	ENSG00000242247	ARFGAP3	ARFGAP1	ADP ribosylation factor GTPase activating protein 3	protein-coding
10_siC_WDR5_peak_12058	chr5	180650086	180650926	+	866	NA	promoter-TSS (NR_039781)	promoter-TSS (NR_039781)	225	NM_201627	90933	Hs.441488	NM_033549	ENSG00000146063	TRIM41	RINCK	tripartite motif containing 41	protein-coding
10_siC_WDR5_peak_4955	chr15	71055504	71056278	+	866	NA	promoter-TSS (NM_018003)	promoter-TSS (NM_018003)	6	NM_018003	55075	Hs.108049	NM_018003	ENSG00000137831	UACA	NUCLING	uveal autoantigen with coiled-coil domains and ankyrin repeats	protein-coding
10_siC_WDR5_peak_9648	chr22	20104596	20105626	+	864	NA	promoter-TSS (NM_182984)	promoter-TSS (NM_182984)	83	NM_002882	5902	Hs.24763	NM_002882	ENSG00000099901	RANBP1	HTF9A	RAN binding protein 1	protein-coding
10_siC_WDR5_peak_3594	chr12	109535261	109536174	+	864	NA	promoter-TSS (NM_003362)	promoter-TSS (NM_003362)	-260	NM_003362	7374	Hs.191334	NM_003362	ENSG00000076248	UNG	DGU|HIGM4|HIGM5|UDG|UNG1|UNG15|UNG2	uracil DNA glycosylase	protein-coding
10_siC_WDR5_peak_11656	chr5	110722039	110722680	+	864	NA	intron (NM_001323374, intron 5 of 11)	intron (NM_001323374, intron 5 of 11)	-125565	NR_040093	100505678	Hs.745061	NR_040093	ENSG00000246859	STARD4-AS1	-	STARD4 antisense RNA 1	ncRNA
10_siC_WDR5_peak_5803	chr17	2239130	2240000	+	863	NA	intron (NM_018128, intron 1 of 14)	intron (NM_018128, intron 1 of 14)	1113	NM_018128	55720	Hs.388170	NM_018128	ENSG00000167721	TSR1	-	TSR1 ribosome maturation factor	protein-coding
10_siC_WDR5_peak_5571	chr16	52410652	52411261	+	861	NA	Intergenic	Intergenic	118480	NR_135281	283854	Hs.266768	NR_135281	ENSG00000260887	CASC22	LINC01373|LincRNA-ENST00000515084|TCONS_00024290	cancer susceptibility 22	ncRNA
10_siC_WDR5_peak_90	chr1	16693758	16694789	+	861	NA	intron (NR_073500, intron 1 of 1)	intron (NR_073500, intron 1 of 1)	536	NR_073500	26099	Hs.252967	NM_001114600	ENSG00000055070	SZRD1	C1orf144	SUZ RNA binding domain containing 1	protein-coding
10_siC_WDR5_peak_9439	chr20	57606957	57607901	+	861	NA	promoter-TSS (NM_006886)	promoter-TSS (NM_006886)	-39	NM_006886	514	Hs.177530	NM_006886	ENSG00000124172	ATP5F1E	ATP5E|ATPE|MC5DN3	ATP synthase F1 subunit epsilon	protein-coding
10_siC_WDR5_peak_6123	chr17	39844952	39845975	+	861	NA	intron (NM_005801, intron 1 of 3)	CpG	326	NM_005801	10209	Hs.150580	NM_005801	ENSG00000173812	EIF1	A121|EIF-1|EIF1A|ISO1|SUI1	eukaryotic translation initiation factor 1	protein-coding
10_siC_WDR5_peak_10532	chr3	148804024	148804775	+	859	NA	promoter-TSS (NM_001318935)	promoter-TSS (NM_001318935)	-58	NM_001318934	6596	Hs.3068	NM_003071	ENSG00000071794	HLTF	HIP116|HIP116A|HLTF1|RNF80|SMARCA3|SNF2L3|ZBU1	helicase like transcription factor	protein-coding
10_siC_WDR5_peak_14749	chr9	86322592	86323346	+	859	NA	promoter-TSS (NM_013438)	promoter-TSS (NM_013438)	-96	NM_013438	29979	Hs.9589	NM_013438	ENSG00000135018	UBQLN1	DA41|DSK2|PLIC-1|UBQN|XDRP1	ubiquilin 1	protein-coding
10_siC_WDR5_peak_12694	chr6	107077149	107077953	+	858	NA	promoter-TSS (NM_018292)	promoter-TSS (NM_018292)	98	NM_018292	55278	Hs.406917	NM_018292	ENSG00000130348	QRSL1	GatA	glutaminyl-tRNA amidotransferase subunit QRSL1	protein-coding
10_siC_WDR5_peak_14654	chr9	37465153	37466361	+	858	NA	promoter-TSS (NM_014872)	promoter-TSS (NM_014872)	-310	NM_014872	9925	Hs.161276	NM_014872	ENSG00000168795	ZBTB5	-	zinc finger and BTB domain containing 5	protein-coding
10_siC_WDR5_peak_7299	chr19	16295879	16296510	+	858	NA	promoter-TSS (NM_014077)	promoter-TSS (NM_014077)	-27	NM_014077	26017	Hs.631614	NM_014077	ENSG00000105058	FAM32A	OTAG-12|OTAG12	family with sequence similarity 32 member A	protein-coding
10_siC_WDR5_peak_9973	chr3	14692846	14693540	+	858	NA	promoter-TSS (NR_135523)	promoter-TSS (NR_135523)	-60	NR_135523	51244	Hs.517820	NM_016474	ENSG00000154781	CCDC174	C3orf19|HSPC212|IHPM|IHPMR	coiled-coil domain containing 174	protein-coding
10_siC_WDR5_peak_13253	chr7	38948418	38948941	+	858	NA	intron (NM_014396, intron 1 of 28)	intron (NM_014396, intron 1 of 28)	112	NM_014396	27072	Hs.592184	NM_014396	ENSG00000006715	VPS41	HVPS41|HVSP41|hVps41p	VPS41 subunit of HOPS complex	protein-coding
10_siC_WDR5_peak_5232	chr16	619716	620355	+	857	NA	promoter-TSS (NM_004204)	promoter-TSS (NM_004204)	67	NM_004204	9091	Hs.741878	NM_004204	ENSG00000007541	PIGQ	GPI1|c407A10.1	phosphatidylinositol glycan anchor biosynthesis class Q	protein-coding
10_siC_WDR5_peak_9469	chr20	62338890	62339735	+	857	NA	promoter-TSS (NM_001267546)	promoter-TSS (NM_001267546)	16	NR_051957	10139	Hs.389277	NM_003224	ENSG00000101246	ARFRP1	ARL18|ARP|Arp1	ADP ribosylation factor related protein 1	protein-coding
10_siC_WDR5_peak_9021	chr2	237629687	237630113	+	857	NA	Intergenic	Intergenic	151432	NM_020311	57007	Hs.471751	NM_020311	ENSG00000144476	ACKR3	CMKOR1|CXC-R7|CXCR-7|CXCR7|GPR159|RDC-1|RDC1	atypical chemokine receptor 3	protein-coding
10_siC_WDR5_peak_9667	chr22	21996110	21996805	+	857	NA	promoter-TSS (NM_022044)	promoter-TSS (NM_022044)	-134	NM_022044	23753	Hs.303116	NM_022044	ENSG00000128228	SDF2L1	-	stromal cell derived factor 2 like 1	protein-coding
10_siC_WDR5_peak_11841	chr5	145561958	145562542	+	856	NA	promoter-TSS (NM_001317964)	promoter-TSS (NM_001317964)	-37	NM_020117	51520	Hs.432674	NM_016460	ENSG00000133706	LARS	HSPC192|ILFS1|LARS1|LEURS|LEUS|LFIS|LRS|PIG44|RNTLS|hr025Cl	leucyl-tRNA synthetase	protein-coding
10_siC_WDR5_peak_1353	chr1	222885676	222886984	+	856	NA	promoter-TSS (NM_001288580)	promoter-TSS (NM_001288580)	-333	NM_001288581	148362	Hs.534965	NM_144695	ENSG00000162819	BROX	C1orf58	BRO1 domain and CAAX motif containing	protein-coding
10_siC_WDR5_peak_1485	chr1	237911439	237912044	+	856	NA	intron (NM_001035, intron 80 of 104)	intron (NM_001035, intron 80 of 104)	-113734	NR_027247	100130331	Hs.661736	NR_027247	ENSG00000237250	LOC100130331	-	POTE ankyrin domain family, member F pseudogene	pseudo
10_siC_WDR5_peak_13509	chr7	91056416	91056797	+	856	NA	Intergenic	Intergenic	162858	NM_003505	8321	Hs.94234	NM_003505	ENSG00000157240	FZD1	-	frizzled class receptor 1	protein-coding
10_siC_WDR5_peak_5451	chr16	28503157	28503772	+	856	NA	promoter-TSS (NM_001286110)	promoter-TSS (NM_001286110)	-61	NM_000086	1201	Hs.534667	NM_000086	ENSG00000188603	CLN3	BTN1|BTS|JNCL	CLN3 lysosomal/endosomal transmembrane protein, battenin	protein-coding
10_siC_WDR5_peak_4846	chr15	62682308	62682950	+	856	NA	Intergenic	CpG	47401	NR_106733	102464834		NR_106733	ENSG00000275451	MIR6085	hsa-mir-6085	microRNA 6085	ncRNA
10_siC_WDR5_peak_3408	chr12	70636891	70638023	+	856	NA	promoter-TSS (NR_037615)	promoter-TSS (NR_037615)	-37	NR_037615	4848	Hs.133350	NM_014515	ENSG00000111596	CNOT2	CDC36|HSPC131|NOT2|NOT2H	CCR4-NOT transcription complex subunit 2	protein-coding
10_siC_WDR5_peak_9759	chr22	35653268	35653936	+	855	NA	intron (NM_001362972, intron 1 of 9)	CpG	116	NM_001003681	10042	Hs.588815	NM_005487	ENSG00000100281	HMGXB4	HMG2L1|HMGBCG|THC211630	HMG-box containing 4	protein-coding
10_siC_WDR5_peak_9767	chr22	36783779	36784536	+	855	NA	promoter-TSS (NM_002473)	promoter-TSS (NM_002473)	-45	NM_002473	4627	Hs.474751	NM_002473	ENSG00000100345	MYH9	BDPLT6|DFNA17|EPSTS|FTNS|MATINS|MHA|NMHC-II-A|NMMHC-IIA|NMMHCA	myosin heavy chain 9	protein-coding
10_siC_WDR5_peak_11302	chr4	190861714	190862384	+	854	NA	promoter-TSS (NM_004477)	promoter-TSS (NM_004477)	22	NM_004477	2483	Hs.203772	NM_004477	ENSG00000109536	FRG1	FRG1A|FSG1	FSHD region gene 1	protein-coding
10_siC_WDR5_peak_10114	chr3	45883437	45883996	+	853	NA	promoter-TSS (NR_075080)	promoter-TSS (NR_075080)	-105	NR_075080	54585	Hs.30824	NM_020347	ENSG00000163818	LZTFL1	BBS17	leucine zipper transcription factor like 1	protein-coding
10_siC_WDR5_peak_3082	chr12	27091361	27092203	+	853	NA	promoter-TSS (NM_018164)	promoter-TSS (NM_018164)	379	NM_001171887	26127	Hs.591162	NM_015633	ENSG00000111790	FGFR1OP2	HSPC123-like|WIT3.0	FGFR1 oncogene partner 2	protein-coding
10_siC_WDR5_peak_10649	chr3	184428622	184430122	+	852	NA	promoter-TSS (NR_160768)	promoter-TSS (NR_160768)	480	NM_022149	64110	Hs.306123	NM_022149	ENSG00000177383	MAGEF1	MAGE-F1	MAGE family member F1	protein-coding
10_siC_WDR5_peak_12099	chr6	5471881	5472665	+	851	NA	intron (NM_001318872, intron 4 of 6)	intron (NM_001318872, intron 4 of 6)	-13965	NR_125847	101927972	Hs.668417	NR_125846	ENSG00000269985	LOC101927972	-	uncharacterized LOC101927972	ncRNA
10_siC_WDR5_peak_894	chr1	155278340	155279035	+	851	NA	promoter-TSS (NM_001135821)	promoter-TSS (NM_001135821)	30	NM_001242824	2224	Hs.335918	NM_002004	ENSG00000160752	FDPS	FPPS|FPS|POROK9	farnesyl diphosphate synthase	protein-coding
10_siC_WDR5_peak_1226	chr1	206137556	206138939	+	850	NA	promoter-TSS (NR_134239)	promoter-TSS (NR_134239)	-193	NM_001287385	554282		NM_001287385	ENSG00000263513	FAM72C	-	family with sequence similarity 72 member C	protein-coding
10_siC_WDR5_peak_12189	chr6	20534572	20535009	+	850	NA	5' UTR (NM_017774, exon 1 of 16)	5' UTR (NM_017774, exon 1 of 16)	102	NM_017774	54901	Hs.657604	NM_017774	ENSG00000145996	CDKAL1	-	CDK5 regulatory subunit associated protein 1 like 1	protein-coding
10_siC_WDR5_peak_213	chr1	36554260	36554875	+	849	NA	promoter-TSS (NM_017825)	promoter-TSS (NM_017825)	74	NM_017825	54936	Hs.18021	NM_017825	ENSG00000116863	ADPRHL2	ARH3|CONDSIAS	ADP-ribosylhydrolase like 2	protein-coding
10_siC_WDR5_peak_11107	chr4	122722246	122722892	+	849	NA	promoter-TSS (NM_005033)	promoter-TSS (NM_005033)	91	NM_005033	5393	Hs.91728	NM_005033	ENSG00000123737	EXOSC9	PCH1D|PM/Scl-75|PMSCL1|RRP45|Rrp45p|p5|p6	exosome component 9	protein-coding
10_siC_WDR5_peak_7081	chr19	2944754	2945525	+	848	NA	promoter-TSS (NM_021217)	promoter-TSS (NM_021217)	-170	NM_021217	58492	Hs.38004	NM_021217	ENSG00000175691	ZNF77	pT1	zinc finger protein 77	protein-coding
10_siC_WDR5_peak_10544	chr3	150263879	150264880	+	848	NA	promoter-TSS (NM_014445)	promoter-TSS (NM_014445)	-86	NM_001319045	83939	Hs.655782	NM_032025	ENSG00000144895	EIF2A	CDA02|EIF-2A|MST089|MSTP004|MSTP089	eukaryotic translation initiation factor 2A	protein-coding
10_siC_WDR5_peak_7329	chr19	18314959	18315552	+	848	NA	promoter-TSS (NR_134910)	promoter-TSS (NR_134910)	-285	NR_134910	102725254	Hs.437211	NR_134910	ENSG00000268650	LOC102725254	-	uncharacterized LOC102725254	ncRNA
10_siC_WDR5_peak_8549	chr2	126401029	126401488	+	848	NA	Intergenic	LTR38|LTR|ERV1	474304	NR_146970	105373600	Hs.555059	NR_146970	ENSG00000226813	LINC01941	-	long intergenic non-protein coding RNA 1941	ncRNA
10_siC_WDR5_peak_4185	chr14	23564637	23565222	+	847	NA	promoter-TSS (NM_014977)	promoter-TSS (NM_014977)	-106	NM_001164815	22985	Hs.124490	NM_014977	ENSG00000100813	ACIN1	ACINUS|ACN|fSAP152	apoptotic chromatin condensation inducer 1	protein-coding
10_siC_WDR5_peak_1207	chr1	204543762	204544227	+	847	NA	Intergenic	Intergenic	58460	NM_002393	4194	Hs.497492	NM_002393	ENSG00000198625	MDM4	HDMX|MDMX|MRP1	MDM4 regulator of p53	protein-coding
10_siC_WDR5_peak_12481	chr6	44224848	44225491	+	847	NA	promoter-TSS (NM_001286520)	promoter-TSS (NM_001286520)	-80	NM_001286512	347734	Hs.182885	NM_178148	ENSG00000157593	SLC35B2	PAPST1|SLL|UGTrel4	solute carrier family 35 member B2	protein-coding
10_siC_WDR5_peak_12863	chr6	142468122	142468745	+	847	NA	promoter-TSS (NM_016485)	promoter-TSS (NM_016485)	33	NM_016485	51534	Hs.431367	NM_016485	ENSG00000009844	VTA1	C6orf55|DRG-1|DRG1|HSPC228|LIP5|My012|SBP1	vesicle trafficking 1	protein-coding
10_siC_WDR5_peak_9476	chr20	62886628	62887357	+	846	NA	promoter-TSS (NM_018257)	promoter-TSS (NM_018257)	-56	NM_001104925	55251	Hs.744845	NM_018257	ENSG00000203880	PCMTD2	C20orf36	protein-L-isoaspartate (D-aspartate) O-methyltransferase domain containing 2	protein-coding
10_siC_WDR5_peak_12168	chr6	16146720	16147093	+	845	NA	exon (NM_013262, exon 7 of 7)	exon (NM_013262, exon 7 of 7)	5119	NR_039782	100616269		NR_039782	ENSG00000263712	MIR4639	-	microRNA 4639	ncRNA
10_siC_WDR5_peak_2625	chr11	71639095	71640285	+	845	NA	promoter-TSS (NR_029192)	promoter-TSS (NR_029192)	-78	NR_024147	55298	Hs.368554	NM_018320	ENSG00000137522	RNF121	-	ring finger protein 121	protein-coding
10_siC_WDR5_peak_13755	chr7	135661642	135662293	+	845	NA	5' UTR (NM_145808, exon 1 of 4)	5' UTR (NM_145808, exon 1 of 4)	140	NM_145808	136319	Hs.602015	NM_145808	ENSG00000105887	MTPN	GCDP|V-1	myotrophin	protein-coding
10_siC_WDR5_peak_14024	chr8	26893668	26894246	+	845	NA	Intergenic	Intergenic	12523	NR_031680	100313884		NR_031680	ENSG00000221616	MIR548H4	MIR548H-4|MIRN548H4|hsa-mir-548h-4	microRNA 548h-4	ncRNA
10_siC_WDR5_peak_1179	chr1	202317518	202318042	+	844	NA	promoter-TSS (NM_001167857)	promoter-TSS (NM_001167857)	-47	NM_001331029	4660	Hs.444403	NM_002481	ENSG00000077157	PPP1R12B	MYPT2|PP1bp55	protein phosphatase 1 regulatory subunit 12B	protein-coding
10_siC_WDR5_peak_9513	chr21	32470968	32471476	+	843	NA	Intergenic	Intergenic	-60427	NM_001099219	728299	Hs.580875	NM_001099219	ENSG00000206102	KRTAP19-8	-	keratin associated protein 19-8	protein-coding
10_siC_WDR5_peak_9262	chr20	34824142	34824726	+	842	NA	promoter-TSS (NM_001271874)	promoter-TSS (NM_001271874)	34	NM_001271874	25980	Hs.11314	NM_015511	ENSG00000131043	AAR2	C20orf4|CGI-23	AAR2 splicing factor	protein-coding
10_siC_WDR5_peak_914	chr1	156307779	156308701	+	842	NA	promoter-TSS (NM_001304824)	promoter-TSS (NM_001304824)	-34	NR_036565	7203	Hs.491494	NM_005998	ENSG00000163468	CCT3	CCT-gamma|CCTG|PIG48|TCP-1-gamma|TRIC5	chaperonin containing TCP1 subunit 3	protein-coding
10_siC_WDR5_peak_5221	chr15	102501556	102502392	+	842	NA	intron (NR_003659, intron 1 of 10)	CpG	958	NR_003659	374666	Hs.459573	NM_199163		WASH3P	FAM39DP	WASP family homolog 3, pseudogene	pseudo
10_siC_WDR5_peak_3819	chr12	133286989	133288047	+	842	NA	promoter-TSS (NM_001170544)	promoter-TSS (NM_001170544)	90	NM_001170543	192111	Hs.102558	NM_138575	ENSG00000247077	PGAM5	BXLBV68	PGAM family member 5, mitochondrial serine/threonine protein phosphatase	protein-coding
10_siC_WDR5_peak_5676	chr16	70473072	70473467	+	842	NA	promoter-TSS (NM_006927)	promoter-TSS (NM_006927)	-266	NM_006927	6483	Hs.368611	NM_006927	ENSG00000157350	ST3GAL2	Gal-NAc6S|SIAT4B|ST3GALII|ST3GalA.2	ST3 beta-galactoside alpha-2,3-sialyltransferase 2	protein-coding
10_siC_WDR5_peak_666	chr1	110026142	110027073	+	841	NA	promoter-TSS (NM_001350175)	promoter-TSS (NM_001350175)	26	NM_001350177	127002	Hs.118248	NM_153340	ENSG00000162650	ATXN7L2	-	ataxin 7 like 2	protein-coding
10_siC_WDR5_peak_11627	chr5	98264668	98265637	+	841	NA	non-coding (NR_157078, exon 1 of 37)	intron (NR_151718, intron 1 of 3)	266	NM_001364113	1105	Hs.643465	NM_001270	ENSG00000153922	CHD1	CHD-1|PILBOS	chromodomain helicase DNA binding protein 1	protein-coding
10_siC_WDR5_peak_6246	chr17	45144639	45145062	+	840	NA	Intergenic	HERVIP10FH-int|LTR|ERV1	-7335	NM_001363805	100506084	Hs.559259	NM_001039083	ENSG00000228696	ARL17B	ARL17|ARL17A	ADP ribosylation factor like GTPase 17B	protein-coding
10_siC_WDR5_peak_2081	chr10	115110120	115110478	+	840	NA	Intergenic	Intergenic	-200291	NM_001177660	3026	Hs.422542	NM_004132	ENSG00000148702	HABP2	FSAP|HABP|HGFAL|NMTC5|PHBP	hyaluronan binding protein 2	protein-coding
10_siC_WDR5_peak_8189	chr2	55495842	55496629	+	839	NA	promoter-TSS (NM_001005369)	promoter-TSS (NM_001005369)	80	NM_001005369	4528	Hs.149894	NM_002453	ENSG00000085760	MTIF2	-	mitochondrial translational initiation factor 2	protein-coding
10_siC_WDR5_peak_12872	chr6	143771307	143772229	+	839	NA	promoter-TSS (NM_182503)	promoter-TSS (NM_182503)	64	NM_182503	134637	Hs.709561	NM_182503	ENSG00000189007	ADAT2	DEADC1|TAD2|dJ20N2|dJ20N2.1	adenosine deaminase tRNA specific 2	protein-coding
10_siC_WDR5_peak_3196	chr12	49453924	49454866	+	839	NA	Intergenic	CpG	-5288	NM_003482	8085	Hs.731384	NM_003482	ENSG00000167548	KMT2D	AAD10|ALR|CAGL114|KABUK1|KMS|MLL2|MLL4|TNRC21	lysine methyltransferase 2D	protein-coding
10_siC_WDR5_peak_3301	chr12	56693542	56694555	+	839	NA	promoter-TSS (NM_004077)	promoter-TSS (NM_004077)	66	NM_004077	1431	Hs.743252	NM_004077	ENSG00000062485	CS	-	citrate synthase	protein-coding
10_siC_WDR5_peak_10176	chr3	51572481	51573052	+	838	NA	promoter-TSS (NM_001322256)	promoter-TSS (NM_001322256)	31	NM_015106	23132	Hs.105399	NM_015106	ENSG00000164080	RAD54L2	ARIP4|HSPC325|SRISNF2L	RAD54 like 2	protein-coding
10_siC_WDR5_peak_3609	chr12	110486217	110486729	+	838	NA	promoter-TSS (NR_148516)	promoter-TSS (NR_148516)	-21	NR_148517	400073	Hs.44817	NM_207435	ENSG00000174456	C12orf76	-	chromosome 12 open reading frame 76	protein-coding
10_siC_WDR5_peak_4714	chr15	42500172	42500741	+	838	NA	promoter-TSS (NM_001301138)	promoter-TSS (NM_001301138)	46	NM_015289	23339	Hs.88025	NM_015289	ENSG00000166887	VPS39	TLP|VAM6|hVam6p	VPS39 subunit of HOPS complex	protein-coding
10_siC_WDR5_peak_6144	chr17	40729153	40730102	+	837	NA	non-coding (NR_045671, exon 1 of 7)	non-coding (NR_045671, exon 1 of 7)	107	NM_001256014	29893	Hs.383019	NM_013290	ENSG00000131470	PSMC3IP	GT198|HOP2|HUMGT198A|ODG3|TBPIP	PSMC3 interacting protein	protein-coding
10_siC_WDR5_peak_4589	chr14	103058208	103059202	+	836	NA	promoter-TSS (NM_015156)	promoter-TSS (NM_015156)	-281	NM_015156	23186	Hs.510521	NM_015156	ENSG00000089902	RCOR1	COREST|RCOR	REST corepressor 1	protein-coding
10_siC_WDR5_peak_7043	chr19	1260746	1261309	+	836	NA	Intergenic	CpG	-8240	NM_001280	1153	Hs.618145	NM_001280	ENSG00000099622	CIRBP	CIRP	cold inducible RNA binding protein	protein-coding
10_siC_WDR5_peak_9932	chr3	9438210	9439689	+	836	NA	promoter-TSS (NM_001349451)	promoter-TSS (NM_001349451)	229	NR_132780	440944	Hs.598958	NM_001013713	ENSG00000206573	THUMPD3-AS1	SETD5-AS1	THUMPD3 antisense RNA 1	ncRNA
10_siC_WDR5_peak_13651	chr7	112090305	112091444	+	836	NA	intron (NM_001007245, intron 2 of 12)	CpG	311	NR_120333	3475	Hs.7879	NM_001550	ENSG00000006652	IFRD1	PC4|TIS7	interferon related developmental regulator 1	protein-coding
10_siC_WDR5_peak_1286	chr1	212964766	212965728	+	836	NA	promoter-TSS (NM_001297737)	promoter-TSS (NM_001297737)	11	NM_001042552	128387	Hs.530538	NM_001042552	ENSG00000203705	TATDN3	-	TatD DNase domain containing 3	protein-coding
10_siC_WDR5_peak_1098	chr1	182602756	182603266	+	836	NA	Intergenic	Intergenic	18736	NR_036490	284648	Hs.253475	NR_036490	ENSG00000261504	LINC01686	-	long intergenic non-protein coding RNA 1686	ncRNA
10_siC_WDR5_peak_5376	chr16	15149547	15150249	+	836	NA	promoter-TSS (NM_001270766)	promoter-TSS (NM_001270766)	33	NM_173474	123803	Hs.592045	NM_173474	ENSG00000157045	NTAN1	PNAA|PNAD	N-terminal asparagine amidase	protein-coding
10_siC_WDR5_peak_14639	chr9	35748984	35749617	+	835	NA	promoter-TSS (NM_020944)	promoter-TSS (NM_020944)	16	NM_001080496	9827	Hs.493804	NM_001080496	ENSG00000107185	RGP1	KIAA0258	RGP1 homolog, RAB6A GEF complex partner 1	protein-coding
10_siC_WDR5_peak_6201	chr17	42422227	42422896	+	835	NA	5' UTR (NM_002087, exon 1 of 13)	5' UTR (NM_002087, exon 1 of 13)	107	NM_002087	2896	Hs.514220	NM_002087	ENSG00000030582	GRN	CLN11|GEP|GP88|PCDGF|PEPI|PGRN	granulin precursor	protein-coding
10_siC_WDR5_peak_2410	chr11	45168565	45169237	+	834	NA	promoter-TSS (NM_001256695)	promoter-TSS (NM_001256695)	7	NM_001256695	56981	Hs.178715	NM_001256695	ENSG00000019485	PRDM11	PFM8	PR/SET domain 11	protein-coding
10_siC_WDR5_peak_6475	chr17	61850563	61852157	+	834	NA	promoter-TSS (NM_020198)	promoter-TSS (NM_020198)	-170	NM_203499	11325	Hs.702010	NM_007372	ENSG00000198231	DDX42	DDX42P|RHELP|RNAHP|SF3B8|SF3b125	DEAD-box helicase 42	protein-coding
10_siC_WDR5_peak_2269	chr11	11484941	11485279	+	834	NA	intron (NM_001363464, intron 1 of 9)	intron (NM_001363464, intron 1 of 9)	-110313	NM_001256686	283106	Hs.654675	NM_001256686	ENSG00000254598	CSNK2A3	CSNK2A1P	casein kinase 2 alpha 3	protein-coding
10_siC_WDR5_peak_820	chr1	151137903	151138771	+	833	NA	promoter-TSS (NM_001204856)	promoter-TSS (NM_001204856)	41	NM_212551	388695	Hs.591482	NM_212551	ENSG00000163155	LYSMD1	SB145	LysM domain containing 1	protein-coding
10_siC_WDR5_peak_13777	chr7	139044138	139045506	+	832	NA	5' UTR (NM_016019, exon 1 of 10)	5' UTR (NM_016019, exon 1 of 10)	182	NM_016019	51631	Hs.731488	NM_016019	ENSG00000146963	LUC7L2	CGI-59|CGI-74|LUC7B2	LUC7 like 2, pre-mRNA splicing factor	protein-coding
10_siC_WDR5_peak_3462	chr12	89919503	89920090	+	831	NA	promoter-TSS (NM_001199781)	promoter-TSS (NM_001199781)	28	NR_037659	282809	Hs.25130	NM_172240	ENSG00000139323	POC1B	CORD20|PIX1|TUWD12|WDR51B	POC1 centriolar protein B	protein-coding
10_siC_WDR5_peak_4433	chr14	75530270	75531046	+	831	NA	promoter-TSS (NR_126393)	promoter-TSS (NR_126393)	69	NM_001107	97	Hs.18573	NM_001107	ENSG00000119640	ACYP1	ACYPE	acylphosphatase 1	protein-coding
10_siC_WDR5_peak_4243	chr14	35590958	35591962	+	831	NA	promoter-TSS (NM_014672)	promoter-TSS (NM_014672)	288	NM_017917	55012	Hs.530712	NM_017917	ENSG00000092020	PPP2R3C	C14orf10|G4-1|G5pr|GDRM|SPGF36	protein phosphatase 2 regulatory subunit B''gamma	protein-coding
10_siC_WDR5_peak_1053	chr1	174968298	174968957	+	831	NA	promoter-TSS (NM_001007214)	promoter-TSS (NM_001007214)	56	NM_001007214	27101	Hs.508524	NM_014412	ENSG00000116161	CACYBP	GIG5|PNAS-107|S100A6BP|SIP	calcyclin binding protein	protein-coding
10_siC_WDR5_peak_10740	chr4	52907	53440	+	830	NA	promoter-TSS (NM_001286052)	promoter-TSS (NM_001286052)	-6	NM_001286052	152687	Hs.709469	NM_182524	ENSG00000272602	ZNF595	-	zinc finger protein 595	protein-coding
10_siC_WDR5_peak_8700	chr2	174219090	174220110	+	830	NA	promoter-TSS (NM_031942)	promoter-TSS (NM_031942)	0	NM_031942	83879	Hs.470654	NM_031942	ENSG00000144354	CDCA7	ICF3|JPO1	cell division cycle associated 7	protein-coding
10_siC_WDR5_peak_4708	chr15	41575668	41576571	+	830	NA	promoter-TSS (NR_152822)	promoter-TSS (NR_152822)	-69	NR_026757	729082	Hs.380164	NR_026757	ENSG00000247556	OIP5-AS1	cyrano|linc-OIP5	OIP5 antisense RNA 1	ncRNA
10_siC_WDR5_peak_4080	chr13	95253629	95254731	+	830	NA	promoter-TSS (NM_180989)	promoter-TSS (NM_180989)	69	NM_180989	160897	Hs.439363	NM_180989	ENSG00000152749	GPR180	ITR	G protein-coupled receptor 180	protein-coding
10_siC_WDR5_peak_6231	chr17	43886581	43887384	+	829	NA	intron (NM_001303018, intron 2 of 10)	intron (NM_001303018, intron 2 of 10)	25296	NM_001145147	1394	Hs.417628	NM_004382	ENSG00000120088	CRHR1	CRF-R|CRF-R-1|CRF-R1|CRF1|CRFR-1|CRFR1|CRH-R-1|CRH-R1|CRHR|CRHR1L	corticotropin releasing hormone receptor 1	protein-coding
10_siC_WDR5_peak_5283	chr16	2723145	2723713	+	829	NA	promoter-TSS (NR_040023)	promoter-TSS (NR_040023)	11	NR_040023	100507321	Hs.406976	NM_001012731		ERVK13-1	-	endogenous retrovirus group K13 member 1	ncRNA
10_siC_WDR5_peak_13397	chr7	69598994	69599466	+	829	NA	intron (NM_001127232, intron 3 of 4)	intron (NM_001127232, intron 3 of 4)	535769	NM_001127232	26053	Hs.21631	NM_015570	ENSG00000158321	AUTS2	FBRSL2|MRD26	activator of transcription and developmental regulator AUTS2	protein-coding
10_siC_WDR5_peak_14652	chr9	37079200	37080150	+	828	NA	promoter-TSS (NR_036592)	promoter-TSS (NR_036592)	-218	NR_036592	100506710	Hs.446271	NR_036592	ENSG00000281649	EBLN3P	EBLN3	endogenous Bornavirus like nucleoprotein 3, pseudogene	pseudo
10_siC_WDR5_peak_3002	chr12	9102034	9102877	+	827	NA	promoter-TSS (NM_001329103)	promoter-TSS (NM_001329103)	-98	NM_001207024	4074	Hs.134084	NM_002355	ENSG00000003056	M6PR	CD-M6PR|CD-MPR|MPR 46|MPR-46|MPR46|SMPR	mannose-6-phosphate receptor, cation dependent	protein-coding
10_siC_WDR5_peak_3970	chr13	46038848	46039425	+	826	NA	promoter-TSS (NM_031431)	promoter-TSS (NM_031431)	62	NM_031431	83548	Hs.507948	NM_031431	ENSG00000136152	COG3	SEC34	component of oligomeric golgi complex 3	protein-coding
10_siC_WDR5_peak_3438	chr12	78603538	78604024	+	826	NA	intron (NM_001024383, intron 39 of 39)	intron (NM_001024383, intron 39 of 39)	149745	NR_135021	105369860	Hs.156898	NR_135021	ENSG00000258220	LINC02424	-	long intergenic non-protein coding RNA 2424	ncRNA
10_siC_WDR5_peak_9057	chr2	242576598	242577488	+	824	NA	promoter-TSS (NM_178326)	promoter-TSS (NM_178326)	-65	NM_178326	23192	Hs.283610	NM_013325	ENSG00000168397	ATG4B	APG4B|AUTL1	autophagy related 4B cysteine peptidase	protein-coding
10_siC_WDR5_peak_8662	chr2	163823765	163824112	+	824	NA	Intergenic	Intergenic	-128661	NM_033272	90134	Hs.657413	NM_033272	ENSG00000184611	KCNH7	ERG3|HERG3|Kv11.3	potassium voltage-gated channel subfamily H member 7	protein-coding
10_siC_WDR5_peak_4281	chr14	51410775	51411503	+	824	NA	promoter-TSS (NM_001163940)	promoter-TSS (NM_001163940)	62	NM_001163940	5836	Hs.282417	NM_002863	ENSG00000100504	PYGL	GSD6	glycogen phosphorylase L	protein-coding
10_siC_WDR5_peak_13087	chr7	6676663	6677082	+	823	NA	promoter-TSS (NM_001278559)	promoter-TSS (NM_001278559)	-77	NM_001278559	100131017	Hs.112668	NM_001278559	ENSG00000205903	ZNF316	MZF-3	zinc finger protein 316	protein-coding
10_siC_WDR5_peak_13694	chr7	128694729	128695500	+	823	NA	promoter-TSS (NR_002187)	promoter-TSS (NR_002187)	113	NM_012470	23534	Hs.193613	NM_012470	ENSG00000064419	TNPO3	IPO12|LGMD1F|LGMDD2|MTR10A|TRN-SR|TRN-SR2|TRNSR	transportin 3	protein-coding
10_siC_WDR5_peak_15061	chr9	134000552	134001421	+	822	NA	promoter-TSS (NM_005085)	promoter-TSS (NM_005085)	13	NM_005085	8021	Hs.654530	NM_005085	ENSG00000126883	NUP214	CAIN|CAN	nucleoporin 214	protein-coding
10_siC_WDR5_peak_13183	chr7	28355340	28356083	+	822	NA	intron (NM_182899, intron 1 of 9)	intron (NM_182899, intron 1 of 9)	16771	NM_182899	9586	Hs.437075	NM_004904	ENSG00000146592	CREB5	CRE-BPA|CREB-5|CREBPA	cAMP responsive element binding protein 5	protein-coding
10_siC_WDR5_peak_7112	chr19	4457538	4458029	+	821	NA	promoter-TSS (NM_025241)	promoter-TSS (NM_025241)	8	NM_025241	80700	Hs.435255	NM_025241	ENSG00000167671	UBXN6	UBXD1|UBXDC2	UBX domain protein 6	protein-coding
10_siC_WDR5_peak_7351	chr19	19431126	19432122	+	821	NA	promoter-TSS (NM_015329)	promoter-TSS (NM_015329)	-14	NM_015329	23383	Hs.654939	NM_015329	ENSG00000129933	MAU2	KIAA0892|MAU2L|SCC4|mau-2	MAU2 sister chromatid cohesion factor	protein-coding
10_siC_WDR5_peak_9079	chr20	1447105	1447758	+	820	NA	exon (NM_018839, exon 1 of 8)	exon (NM_018839, exon 1 of 8)	906	NR_038164	55968	Hs.12865	NM_016143	ENSG00000088833	NSFL1C	P47|UBX1|UBXD10|UBXN2C|dJ776F14.1	NSFL1 cofactor	protein-coding
10_siC_WDR5_peak_10109	chr3	45429933	45430402	+	820	NA	promoter-TSS (NM_001368263)	promoter-TSS (NM_001368263)	99	NM_015340	23395	Hs.526975	NM_015340	ENSG00000011376	LARS2	HLASA|LEURS|PRLTS4|mtLeuRS	leucyl-tRNA synthetase 2, mitochondrial	protein-coding
10_siC_WDR5_peak_965	chr1	161195504	161196101	+	820	NA	promoter-TSS (NM_001286373)	promoter-TSS (NM_001286373)	-48	NM_032174	84134	Hs.321653	NM_032174	ENSG00000158882	TOMM40L	TOMM40B	translocase of outer mitochondrial membrane 40 like	protein-coding
10_siC_WDR5_peak_5057	chr15	79164879	79166127	+	819	NA	5' UTR (NM_001265604, exon 1 of 12)	intron (NM_206839, intron 1 of 12)	172	NM_001265604	10933	Hs.374503	NM_006791	ENSG00000185787	MORF4L1	Eaf3|FWP006|HsT17725|MEAF3|MORFRG15|MRG15|S863-6	mortality factor 4 like 1	protein-coding
10_siC_WDR5_peak_3592	chr12	109490102	109490638	+	819	NA	promoter-TSS (NM_032663)	promoter-TSS (NM_032663)	-11	NM_032663	84749	Hs.486434	NM_032663	ENSG00000135093	USP30	-	ubiquitin specific peptidase 30	protein-coding
10_siC_WDR5_peak_2229	chr11	3818466	3819447	+	819	NA	promoter-TSS (NM_001283040)	promoter-TSS (NM_001283040)	2	NM_001256235	27315	Hs.133968	NM_014489	ENSG00000148985	PGAP2	CWH43-N|FRAG1|HPMRS3|MRT17|MRT21	post-GPI attachment to proteins 2	protein-coding
10_siC_WDR5_peak_5028	chr15	77223667	77224374	+	818	NA	promoter-TSS (NM_002902)	promoter-TSS (NM_002902)	-70	NM_001271837	5955	Hs.79088	NM_002902	ENSG00000117906	RCN2	E6BP|ERC-55|ERC55|TCBP49	reticulocalbin 2	protein-coding
10_siC_WDR5_peak_5412	chr16	21831367	21832318	+	818	NA	Intergenic	CpG	-1347	NR_003370	730092	Hs.31290	NR_003370		RRN3P1	-	RRN3 homolog, RNA polymerase I transcription factor pseudogene 1	pseudo
10_siC_WDR5_peak_9453	chr20	60877696	60878309	+	818	NA	promoter-TSS (NM_007002)	promoter-TSS (NM_007002)	50	NM_001281438	11047	Hs.90107	NM_007002	ENSG00000130706	ADRM1	ARM-1|ARM1|GP110	adhesion regulating molecule 1	protein-coding
10_siC_WDR5_peak_4172	chr14	21924089	21924814	+	818	NA	promoter-TSS (NM_001170629)	promoter-TSS (NM_001170629)	-169	NM_001170629	57680	Hs.530698	NM_020920	ENSG00000100888	CHD8	AUTS18|HELSNF1	chromodomain helicase DNA binding protein 8	protein-coding
10_siC_WDR5_peak_8433	chr2	96873843	96874966	+	817	NA	non-coding (NR_046322, exon 1 of 4)	non-coding (NR_046322, exon 1 of 4)	169	NM_020151	56910	Hs.469331	NM_020151	ENSG00000084090	STARD7	GTT1	StAR related lipid transfer domain containing 7	protein-coding
10_siC_WDR5_peak_6276	chr17	47021913	47022500	+	817	NA	promoter-TSS (NM_007241)	promoter-TSS (NM_007241)	-2	NR_133679	11267	Hs.127249	NM_007241	ENSG00000159210	SNF8	Dot3|EAP30|VPS22	SNF8 subunit of ESCRT-II	protein-coding
10_siC_WDR5_peak_11055	chr4	102267682	102269398	+	817	NA	promoter-TSS (NR_033874)	promoter-TSS (NR_033874)	143	NM_000944	5530	Hs.435512	NM_000944	ENSG00000138814	PPP3CA	ACCIID|CALN|CALNA|CALNA1|CCN1|CNA1|IECEE|IECEE1|PPP2B	protein phosphatase 3 catalytic subunit alpha	protein-coding
10_siC_WDR5_peak_1544	chr1	249152761	249153448	+	816	NA	5' UTR (NM_001136036, exon 1 of 12)	5' UTR (NM_001136036, exon 1 of 12)	180	NM_001350073	55657	Hs.377705	NM_017865	ENSG00000171163	ZNF692	AREBP|Zfp692	zinc finger protein 692	protein-coding
10_siC_WDR5_peak_3810	chr12	132628648	132629171	+	815	NA	promoter-TSS (NM_024078)	promoter-TSS (NM_024078)	-45	NM_175066	317781	Hs.445168	NM_175066	ENSG00000185163	DDX51	-	DEAD-box helicase 51	protein-coding
10_siC_WDR5_peak_9625	chr22	18111188	18111878	+	814	NA	promoter-TSS (NM_001039366)	promoter-TSS (NM_001039366)	-18	NM_001696	529	Hs.517338	NM_001696	ENSG00000131100	ATP6V1E1	ARCL2C|ATP6E|ATP6E2|ATP6V1E|P31|Vma4	ATPase H+ transporting V1 subunit E1	protein-coding
10_siC_WDR5_peak_6416	chr17	56709367	56709887	+	814	NA	intron (NM_198393, intron 2 of 32)	intron (NM_198393, intron 2 of 32)	59789	NM_031272	56155	Hs.390221	NM_031272	ENSG00000121101	TEX14	CT113|SPGF23	testis expressed 14, intercellular bridge forming factor	protein-coding
10_siC_WDR5_peak_3459	chr12	88535421	88536352	+	814	NA	promoter-TSS (NM_001366583)	promoter-TSS (NM_001366583)	107	NM_025114	80184	Hs.150444	NM_025114	ENSG00000198707	CEP290	3H11Ag|BBS14|CT87|JBTS5|LCA10|MKS4|NPHP6|POC3|SLSN6|rd16	centrosomal protein 290	protein-coding
10_siC_WDR5_peak_2996	chr12	8178927	8179647	+	814	NA	Intergenic	Intergenic	-6025	NM_018416	55810	Hs.120844	NM_018416	ENSG00000065970	FOXJ2	FHX	forkhead box J2	protein-coding
10_siC_WDR5_peak_13769	chr7	138660506	138660984	+	813	NA	intron (NM_001164665, intron 1 of 19)	intron (NM_001164665, intron 1 of 19)	5390	NM_001164665	57670	Hs.605380	NM_020910	ENSG00000122778	KIAA1549	-	KIAA1549	protein-coding
10_siC_WDR5_peak_6484	chr17	62501436	62503591	+	813	NA	promoter-TSS (NM_001320597)	promoter-TSS (NM_001320597)	-106	NM_004396	1655	Hs.279806	NM_004396	ENSG00000108654	DDX5	G17P1|HLR1|HUMP68|p68	DEAD-box helicase 5	protein-coding
10_siC_WDR5_peak_10722	chr3	196295185	196295846	+	812	NA	promoter-TSS (NM_001345917)	promoter-TSS (NM_001345917)	-16	NM_001105573	200933	Hs.169815	NM_001105573	ENSG00000174013	FBXO45	Fbx45	F-box protein 45	protein-coding
10_siC_WDR5_peak_15074	chr9	135364119	135364475	+	812	NA	intron (NM_207417, intron 2 of 6)	intron (NM_207417, intron 2 of 6)	78699	NM_001282957	389799	Hs.201709	NM_207417	ENSG00000188523	CFAP77	C9orf171	cilia and flagella associated protein 77	protein-coding
10_siC_WDR5_peak_10422	chr3	124490828	124491446	+	812	NA	intron (NM_001354766, intron 10 of 13)	intron (NM_001354766, intron 10 of 13)	39851	NR_036088	100422864		NR_036088	ENSG00000265981	MIR544B	-	microRNA 544b	ncRNA
10_siC_WDR5_peak_6703	chr17	79367633	79368112	+	811	NA	Intergenic	CpG	-5302	NM_001291324	57597	Hs.514580	NM_024696	ENSG00000266074	BAHCC1	BAHD2	BAH domain and coiled-coil containing 1	protein-coding
10_siC_WDR5_peak_4375	chr14	68283031	68283634	+	811	NA	promoter-TSS (NM_015346)	promoter-TSS (NM_015346)	-25	NM_015346	23503	Hs.98041	NM_015346	ENSG00000072121	ZFYVE26	FYVE-CENT|SPG15	zinc finger FYVE-type containing 26	protein-coding
10_siC_WDR5_peak_2455	chr11	57508503	57509244	+	811	NA	promoter-TSS (NM_170746)	promoter-TSS (NM_170746)	-90	NM_170746	280636	Hs.655373	NM_170746	ENSG00000211450	SELENOH	C11orf31|C17orf10|SELH	selenoprotein H	protein-coding
10_siC_WDR5_peak_14942	chr9	123342183	123342780	+	811	NA	promoter-TSS (NR_073555)	promoter-TSS (NR_073555)	-33	NM_001272039	55755	Hs.269560	NM_018249	ENSG00000136861	CDK5RAP2	C48|Cep215|MCPH3	CDK5 regulatory subunit associated protein 2	protein-coding
10_siC_WDR5_peak_14990	chr9	130158847	130159894	+	810	NA	promoter-TSS (NM_001271711)	promoter-TSS (NM_001271711)	-47	NM_001271711	29988	Hs.179522	NM_014580	ENSG00000136856	SLC2A8	GLUT8|GLUTX1	solute carrier family 2 member 8	protein-coding
10_siC_WDR5_peak_14975	chr9	127905411	127906106	+	810	NA	promoter-TSS (NM_001144877)	promoter-TSS (NM_001144877)	49	NM_001144877	286205	Hs.59504	NM_173690	ENSG00000173611	SCAI	C9orf126|NET40	suppressor of cancer cell invasion	protein-coding
10_siC_WDR5_peak_12940	chr6	157743992	157744922	+	810	NA	exon (NM_018452, exon 1 of 4)	exon (NM_018452, exon 1 of 4)	834	NM_018452	729515	Hs.157212	NM_018452	ENSG00000215712	TMEM242	BM033|C6orf35	transmembrane protein 242	protein-coding
10_siC_WDR5_peak_3205	chr12	49961715	49962393	+	810	NA	promoter-TSS (NM_006337)	promoter-TSS (NM_006337)	-126	NM_001278341	10445	Hs.25313	NM_006337	ENSG00000187778	MCRS1	ICP22BP|INO80Q|MCRS2|MSP58|P78	microspherule protein 1	protein-coding
10_siC_WDR5_peak_2293	chr11	16759205	16759728	+	809	NA	promoter-TSS (NM_014267)	promoter-TSS (NM_014267)	558	NM_001367872	55553	Hs.368226	NM_017508	ENSG00000110693	SOX6	HSSOX6|SOXD	SRY-box transcription factor 6	protein-coding
10_siC_WDR5_peak_7769	chr19	56652167	56652640	+	809	NA	promoter-TSS (NM_018337)	promoter-TSS (NM_018337)	-253	NM_001253792	55311	Hs.24545	NM_018337	ENSG00000167685	ZNF444	EZF-2|EZF2|ZSCAN17	zinc finger protein 444	protein-coding
10_siC_WDR5_peak_7716	chr19	52692721	52693742	+	809	NA	promoter-TSS (NM_014225)	promoter-TSS (NM_014225)	-74	NR_033500	5518	Hs.467192	NM_014225	ENSG00000105568	PPP2R1A	MRD36|PP2A-Aalpha|PP2AA|PP2AAALPHA|PR65A	protein phosphatase 2 scaffold subunit Aalpha	protein-coding
10_siC_WDR5_peak_6990	chr18	67872576	67873727	+	809	NA	promoter-TSS (NM_173630)	promoter-TSS (NM_173630)	-228	NM_001318520	25914	Hs.654809	NM_173630	ENSG00000176225	RTTN	MSSP	rotatin	protein-coding
10_siC_WDR5_peak_5359	chr16	11439084	11439912	+	809	NA	promoter-TSS (NR_135174)	promoter-TSS (NR_135174)	182	NM_152308	116028	Hs.347524	NM_152308	ENSG00000175643	RMI2	BLAP18|C16orf75	RecQ mediated genome instability 2	protein-coding
10_siC_WDR5_peak_12449	chr6	42531425	42532050	+	809	NA	promoter-TSS (NM_015255)	promoter-TSS (NM_015255)	-23	NM_015255	23304	Hs.529925	NM_015255	ENSG00000024048	UBR2	C6orf133|bA49A4.1|dJ242G1.1|dJ392M17.3	ubiquitin protein ligase E3 component n-recognin 2	protein-coding
10_siC_WDR5_peak_13673	chr7	126124086	126124480	+	808	NA	intron (NM_000845, intron 9 of 10)	intron (NM_000845, intron 9 of 10)	573955	NR_030323	693177		NR_030323	ENSG00000207692	MIR592	MIRN592|hsa-mir-592|mir-592	microRNA 592	ncRNA
10_siC_WDR5_peak_10572	chr3	159577278	159577656	+	808	NA	intron (NM_001197109, intron 1 of 6)	intron (NM_001197109, intron 1 of 6)	19817	NM_001197109	29970	Hs.134665	NM_014575	ENSG00000151967	SCHIP1	SCHIP-1	schwannomin interacting protein 1	protein-coding
10_siC_WDR5_peak_6394	chr17	55927026	55928049	+	808	NA	promoter-TSS (NM_016070)	promoter-TSS (NM_016070)	-132	NM_016070	51649	Hs.5836	NM_016070	ENSG00000181610	MRPS23	CGI-138|HSPC329|MRP-S23	mitochondrial ribosomal protein S23	protein-coding
10_siC_WDR5_peak_1552	chr10	1094579	1095709	+	807	NA	promoter-TSS (NM_001317956)	promoter-TSS (NM_001317956)	162	NM_004508	3422	Hs.283652	NM_004508	ENSG00000067064	IDI1	IPP1|IPPI1	isopentenyl-diphosphate delta isomerase 1	protein-coding
10_siC_WDR5_peak_5462	chr16	28985326	28986454	+	807	NA	promoter-TSS (NM_001142448)	promoter-TSS (NM_001142448)	-209	NM_001142451	83985	Hs.617449	NM_032038	ENSG00000169682	SPNS1	HSpin1|LAT|PP2030|SLC62A1|SPIN1|SPINL|nrs	sphingolipid transporter 1 (putative)	protein-coding
10_siC_WDR5_peak_1079	chr1	180471330	180472203	+	807	NA	promoter-TSS (NM_032360)	promoter-TSS (NM_032360)	-54	NM_032360	84320	Hs.200051	NM_032360	ENSG00000230124	ACBD6	-	acyl-CoA binding domain containing 6	protein-coding
10_siC_WDR5_peak_9776	chr22	38054152	38055005	+	806	NA	promoter-TSS (NR_109952)	promoter-TSS (NR_109952)	-152	NM_020315	57026	Hs.632762	NM_020315	ENSG00000241360	PDXP	CIN|PLP|dJ37E16.5	pyridoxal phosphatase	protein-coding
10_siC_WDR5_peak_3255	chr12	53894502	53895562	+	806	NA	promoter-TSS (NM_134324)	promoter-TSS (NM_134324)	-35	NM_134323	6895	Hs.326	NM_004178	ENSG00000139546	TARBP2	LOQS|TRBP|TRBP1|TRBP2	TARBP2 subunit of RISC loading complex	protein-coding
10_siC_WDR5_peak_4256	chr14	45553260	45553887	+	805	NA	intron (NM_017922, intron 1 of 13)	intron (NM_017922, intron 1 of 13)	254	NM_017922	55015	Hs.274337	NM_017922	ENSG00000185246	PRPF39	-	pre-mRNA processing factor 39	protein-coding
10_siC_WDR5_peak_5304	chr16	3450575	3451508	+	805	NA	promoter-TSS (NM_001324344)	promoter-TSS (NM_001324344)	24	NM_001284528	54925	Hs.592078	NM_017810	ENSG00000140987	ZSCAN32	HCCS-5|ZNF434	zinc finger and SCAN domain containing 32	protein-coding
10_siC_WDR5_peak_14981	chr9	128508245	128509227	+	805	NA	promoter-TSS (NM_001330782)	promoter-TSS (NM_001330782)	-528	NR_122032	51145	Hs.104671	NM_016158		LOC51145	-	uncharacterized LOC51145	ncRNA
10_siC_WDR5_peak_8043	chr2	31225485	31225973	+	805	NA	intron (NM_024572, intron 1 of 14)	intron (NM_024572, intron 1 of 14)	126777	NM_001253827	79623	Hs.468058	NM_024572	ENSG00000158089	GALNT14	GALNT15|GalNac-T10|GalNac-T14	polypeptide N-acetylgalactosaminyltransferase 14	protein-coding
10_siC_WDR5_peak_2435	chr11	47447576	47448403	+	805	NA	promoter-TSS (NM_002804)	promoter-TSS (NM_002804)	35	NM_002804	5702	Hs.250758	NM_002804	ENSG00000165916	PSMC3	TBP1	proteasome 26S subunit, ATPase 3	protein-coding
10_siC_WDR5_peak_4867	chr15	64454776	64455771	+	804	NA	promoter-TSS (NM_000942)	promoter-TSS (NM_000942)	81	NM_000942	5479	Hs.434937	NM_000942	ENSG00000166794	PPIB	B|CYP-S1|CYPB|HEL-S-39|OI9|SCYLP	peptidylprolyl isomerase B	protein-coding
10_siC_WDR5_peak_793	chr1	149899398	149899960	+	803	NA	promoter-TSS (NM_005850)	promoter-TSS (NM_005850)	16	NM_005850	10262	Hs.516160	NM_005850	ENSG00000143368	SF3B4	AFD1|Hsh49|SAP49|SF3b49	splicing factor 3b subunit 4	protein-coding
10_siC_WDR5_peak_13281	chr7	43571132	43571692	+	803	NA	intron (NM_015052, intron 24 of 29)	L2a|LINE|L2	-9271	NR_038276	100506895	Hs.676047	NR_038276	ENSG00000231638	LUARIS	SCAT6|lncRNA32	lncRNA upregulator of antiviral response interferon signaling	ncRNA
10_siC_WDR5_peak_6741	chr17	80376224	80376789	+	803	NA	promoter-TSS (NR_033265)	promoter-TSS (NR_033265)	-44	NM_175902	79701	Hs.187505	NM_024648	ENSG00000181396	OGFOD3	C17orf101	2-oxoglutarate and iron dependent oxygenase domain containing 3	protein-coding
10_siC_WDR5_peak_14139	chr8	54755380	54756174	+	803	NA	promoter-TSS (NM_015941)	promoter-TSS (NM_015941)	28	NM_015941	51606	Hs.491737	NM_015941	ENSG00000047249	ATP6V1H	CGI-11|MSTP042|NBP1|SFD|SFDalpha|SFDbeta|VMA13	ATPase H+ transporting V1 subunit H	protein-coding
10_siC_WDR5_peak_6339	chr17	49879919	49880328	+	803	NA	intron (NM_001082533, intron 4 of 9)	intron (NM_001082533, intron 4 of 9)	355951	NM_020178	56934	Hs.463466	NM_020178	ENSG00000154975	CA10	CA-RPX|CARPX|HUCEP-15	carbonic anhydrase 10	protein-coding
10_siC_WDR5_peak_7276	chr19	14247228	14248232	+	802	NA	promoter-TSS (NR_045214)	promoter-TSS (NR_045214)	-234	NR_045214	100507373	Hs.720437	NR_045214	ENSG00000267169	LOC100507373	-	uncharacterized LOC100507373	ncRNA
10_siC_WDR5_peak_6817	chr18	20824338	20824726	+	802	NA	intron (NM_001256438, intron 7 of 9)	intron (NM_001256438, intron 7 of 9)	88743	NM_138375	91768	Hs.11108	NM_138375	ENSG00000134508	CABLES1	CABL1|CABLES|HsT2563|IK3-1	Cdk5 and Abl enzyme substrate 1	protein-coding
10_siC_WDR5_peak_219	chr1	36929561	36930127	+	802	NA	exon (NM_031280, exon 1 of 8)	exon (NM_031280, exon 1 of 8)	141	NM_031280	64960	Hs.352839	NM_031280	ENSG00000116898	MRPS15	DC37|MPR-S15|RPMS15|S15mt	mitochondrial ribosomal protein S15	protein-coding
10_siC_WDR5_peak_5475	chr16	29801677	29802517	+	800	NA	promoter-TSS (NM_001256270)	promoter-TSS (NM_001256270)	25	NM_001256269	3835	Hs.612151	NM_007317	ENSG00000079616	KIF22	A-328A3.2|KID|KNSL4|OBP|OBP-1|OBP-2|SEMDJL2	kinesin family member 22	protein-coding
10_siC_WDR5_peak_204	chr1	35544761	35545652	+	800	NA	intron (NM_001319955, intron 1 of 8)	CpG	220	NM_024772	79830	Hs.471243	NM_024772	ENSG00000197056	ZMYM1	MYM	zinc finger MYM-type containing 1	protein-coding
10_siC_WDR5_peak_13685	chr7	127983553	127984162	+	799	NA	5' UTR (NM_018077, exon 1 of 19)	5' UTR (NM_018077, exon 1 of 19)	105	NM_001166135	55131	Hs.274263	NM_018077	ENSG00000106344	RBM28	ANES	RNA binding motif protein 28	protein-coding
10_siC_WDR5_peak_14787	chr9	94877370	94877875	+	799	NA	promoter-TSS (NM_178324)	promoter-TSS (NM_178324)	73	NM_001368272	10558	Hs.90458	NM_006415	ENSG00000090054	SPTLC1	HSAN1|HSN1|LBC1|LCB1|SPT1|SPTI	serine palmitoyltransferase long chain base subunit 1	protein-coding
10_siC_WDR5_peak_13094	chr7	7679626	7680701	+	799	NA	promoter-TSS (NM_001302348)	promoter-TSS (NM_001302348)	-220	NM_001302349	729852	Hs.652371	NM_001302348	ENSG00000219545	UMAD1	RPA3-AS1|RPA3OS	UBAP1-MVB12-associated (UMA) domain containing 1	protein-coding
10_siC_WDR5_peak_6535	chr17	69019720	69020119	+	799	NA	Intergenic	Intergenic	178401	NR_104152	101928165	Hs.407613	NR_104152	ENSG00000260785	CASC17	LINC00600	cancer susceptibility 17	ncRNA
10_siC_WDR5_peak_9929	chr3	9242915	9243263	+	799	NA	intron (NM_014850, intron 1 of 21)	intron (NM_014850, intron 1 of 21)	8912	NR_121663	101927416	Hs.475364	NR_121663	ENSG00000228723	SRGAP3-AS2	-	SRGAP3 antisense RNA 2	ncRNA
10_siC_WDR5_peak_4769	chr15	49102772	49103679	+	798	NA	promoter-TSS (NM_001194998)	promoter-TSS (NM_001194998)	41	NM_014985	22995	Hs.443005	NM_014985	ENSG00000103995	CEP152	MCPH4|MCPH9|SCKL5	centrosomal protein 152	protein-coding
10_siC_WDR5_peak_3534	chr12	102799777	102800204	+	798	NA	intron (NM_000618, intron 3 of 3)	intron (NM_000618, intron 3 of 3)	72338	NM_001111284	3479	Hs.160562	NM_000618	ENSG00000017427	IGF1	IGF|IGF-I|IGFI|MGF	insulin like growth factor 1	protein-coding
10_siC_WDR5_peak_11101	chr4	120375693	120376222	+	798	NA	promoter-TSS (NR_135112)	promoter-TSS (NR_135112)	19	NR_037630	645513	Hs.677546	NR_037630	ENSG00000245958	LOC645513	-	septin 7 pseudogene	pseudo
10_siC_WDR5_peak_7822	chr19	58962754	58963259	+	797	NA	promoter-TSS (NM_207395)	promoter-TSS (NM_207395)	17	NM_207395	388569	Hs.186970	NM_207395	ENSG00000249471	ZNF324B	-	zinc finger protein 324B	protein-coding
10_siC_WDR5_peak_3933	chr13	41345077	41345545	+	797	NA	promoter-TSS (NM_005830)	promoter-TSS (NM_005830)	15	NM_005830	10240	Hs.596607	NM_005830	ENSG00000102738	MRPS31	IMOGN38|MRP-S31|S31mt	mitochondrial ribosomal protein S31	protein-coding
10_siC_WDR5_peak_15134	chr9	140099761	140100523	+	797	NA	promoter-TSS (NM_014434)	promoter-TSS (NM_014434)	-10	NM_001144028	27158	Hs.512564	NM_014434	ENSG00000188566	NDOR1	CIAE1|NR1|bA350O14.9	NADPH dependent diflavin oxidoreductase 1	protein-coding
10_siC_WDR5_peak_7544	chr19	42580022	42580537	+	797	NA	promoter-TSS (NM_022752)	promoter-TSS (NM_022752)	-39	NM_022752	64763	Hs.13323	NM_022752	ENSG00000105732	ZNF574	FP972	zinc finger protein 574	protein-coding
10_siC_WDR5_peak_5524	chr16	30968580	30969653	+	797	NA	promoter-TSS (NM_014712)	promoter-TSS (NM_014712)	41	NM_014712	9739	Hs.297483	NM_014712	ENSG00000099381	SETD1A	KMT2F|Set1|Set1A	SET domain containing 1A, histone lysine methyltransferase	protein-coding
10_siC_WDR5_peak_9327	chr20	44519708	44520198	+	797	NA	promoter-TSS (NM_080749)	promoter-TSS (NM_080749)	-27	NM_080749	140825	Hs.517094	NM_080749	ENSG00000124257	NEURL2	C20orf163|OZZ|OZZ-E3	neuralized E3 ubiquitin protein ligase 2	protein-coding
10_siC_WDR5_peak_9768	chr22	36877312	36878419	+	796	NA	promoter-TSS (NM_012473)	promoter-TSS (NM_012473)	-178	NM_012473	25828	Hs.211929	NM_012473	ENSG00000100348	TXN2	COXPD29|MT-TRX|MTRX|TRX2|TXN	thioredoxin 2	protein-coding
10_siC_WDR5_peak_13789	chr7	140714393	140715125	+	796	NA	promoter-TSS (NM_053035)	promoter-TSS (NM_053035)	-7	NM_053035	51650	Hs.416207	NM_016071	ENSG00000090263	MRPS33	CGI-139|MRP-S33|PTD003|S33mt	mitochondrial ribosomal protein S33	protein-coding
10_siC_WDR5_peak_1726	chr10	46090084	46090576	+	796	NA	promoter-TSS (NM_145021)	promoter-TSS (NM_145021)	24	NM_145021	220972	Hs.499489	NM_145021	ENSG00000165406	2022-03-08	CMIR|MARCH-VIII|MIR|RNF178|c-MIR	membrane associated ring-CH-type finger 8	protein-coding
10_siC_WDR5_peak_4593	chr14	103995340	103995843	+	796	NA	promoter-TSS (NM_152307)	promoter-TSS (NM_152307)	58	NM_152307	115708	Hs.525610	NM_152307	ENSG00000166166	TRMT61A	C14orf172|GCD14|Gcd14p|TRM61|hTRM61	tRNA methyltransferase 61A	protein-coding
10_siC_WDR5_peak_8998	chr2	232650861	232651545	+	796	NA	promoter-TSS (NM_022730)	promoter-TSS (NM_022730)	48	NM_001282950	64708	Hs.335061	NM_022730	ENSG00000144524	COPS7B	CSN7B|SGN7b	COP9 signalosome subunit 7B	protein-coding
10_siC_WDR5_peak_3404	chr12	69863902	69864682	+	795	NA	5' UTR (NM_001278351, exon 1 of 11)	5' UTR (NM_001278351, exon 1 of 11)	124	NM_001278355	10818	Hs.593446	NM_006654	ENSG00000166225	FRS2	FRS1A|FRS2A|FRS2alpha|SNT|SNT-1|SNT1	fibroblast growth factor receptor substrate 2	protein-coding
10_siC_WDR5_peak_1367	chr1	224622278	224622962	+	795	NA	promoter-TSS (NR_136295)	promoter-TSS (NR_136295)	69	NR_136295	149111	Hs.731723	NM_152495	ENSG00000143786	CNIH3	CNIH-3	cornichon family AMPA receptor auxiliary protein 3	protein-coding
10_siC_WDR5_peak_742	chr1	120838057	120839210	+	795	NA	promoter-TSS (NM_001320149)	promoter-TSS (NM_001320149)	-372	NM_001100910	653820	Hs.339665	NM_001100910	ENSG00000188610	FAM72B	p17	family with sequence similarity 72 member B	protein-coding
10_siC_WDR5_peak_9779	chr22	38240029	38240842	+	795	NA	promoter-TSS (NM_001363839)	promoter-TSS (NM_001363839)	19	NR_146280	129138	Hs.135259	NM_138797	ENSG00000100124	ANKRD54	LIAR	ankyrin repeat domain 54	protein-coding
10_siC_WDR5_peak_7648	chr19	49140695	49141495	+	795	NA	promoter-TSS (NR_004401)	promoter-TSS (NR_004401)	-201	NR_004401	653677	Hs.443160	NR_004401	ENSG00000232871	SEC1P	SEC1	secretory blood group 1, pseudogene	pseudo
10_siC_WDR5_peak_2734	chr11	94706261	94707103	+	795	NA	promoter-TSS (NM_018039)	promoter-TSS (NM_018039)	38	NM_016403	51503	Hs.503597	NM_016403	ENSG00000150316	CWC15	AD002|C11orf5|Cwf15|HSPC148|ORF5	CWC15 spliceosome associated protein homolog	protein-coding
10_siC_WDR5_peak_12818	chr6	131131377	131131798	+	795	NA	Intergenic	Intergenic	-16958	NM_001195597	100507203	Hs.388715	NM_001195597	ENSG00000256162	SMLR1	-	small leucine rich protein 1	protein-coding
10_siC_WDR5_peak_9839	chr22	42710169	42710640	+	795	NA	Intergenic	Intergenic	-30471	NM_005650	6942	Hs.475018	NM_005650	ENSG00000100207	TCF20	AR1|DDVIBA|SPBP|TCF-20	transcription factor 20	protein-coding
10_siC_WDR5_peak_13263	chr7	40173756	40174551	+	795	NA	promoter-TSS (NM_138701)	promoter-TSS (NM_138701)	68	NM_138701	136647	Hs.654989	NM_138701	ENSG00000168303	MPLKIP	ABHS|C7orf11|ORF20|TTD4	M-phase specific PLK1 interacting protein	protein-coding
10_siC_WDR5_peak_13345	chr7	64254589	64255193	+	795	NA	promoter-TSS (NM_001271639)	promoter-TSS (NM_001271639)	85	NR_160269	7697	Hs.184080	NM_006524	ENSG00000197008	ZNF138	pHZ-32	zinc finger protein 138	protein-coding
10_siC_WDR5_peak_10983	chr4	78077986	78078485	+	794	NA	promoter-TSS (NM_004354)	promoter-TSS (NM_004354)	-125	NM_004354	901	Hs.740456	NM_004354	ENSG00000138764	CCNG2	-	cyclin G2	protein-coding
10_siC_WDR5_peak_9473	chr20	62612213	62612811	+	794	NA	promoter-TSS (NM_012469)	promoter-TSS (NM_012469)	27	NM_012469	24148	Hs.31334	NM_012469	ENSG00000101161	PRPF6	ANT-1|ANT1|C20orf14|Prp6|RP60|SNRNP102|TOM|U5-102K|hPrp6	pre-mRNA processing factor 6	protein-coding
10_siC_WDR5_peak_7206	chr19	11266239	11266841	+	793	NA	promoter-TSS (NM_001317033)	promoter-TSS (NM_001317033)	-52	NM_001317032	147841	Hs.381225	NM_182513	ENSG00000161888	SPC24	SPBC24	SPC24 component of NDC80 kinetochore complex	protein-coding
10_siC_WDR5_peak_6329	chr17	49008483	49009213	+	793	NA	Intergenic	CpG	-63509	NM_001243877	10140	Hs.703321	NM_005749	ENSG00000141232	TOB1	APRO5|APRO6|PIG49|TOB|TROB|TROB1	transducer of ERBB2, 1	protein-coding
10_siC_WDR5_peak_6861	chr18	36152698	36153057	+	792	NA	Intergenic	Intergenic	915779	NR_036202	100422857		NR_036202	ENSG00000266530	MIR4318	-	microRNA 4318	ncRNA
10_siC_WDR5_peak_4063	chr13	79861954	79862455	+	792	NA	Intergenic	Intergenic	118152	NM_001286632	64062	Hs.558528	NM_018605	ENSG00000139746	RBM26	ARRS2|C13orf10|PPP1R132|PRO1777|SE70-2|ZC3H17	RNA binding motif protein 26	protein-coding
10_siC_WDR5_peak_11652	chr5	108981620	108981935	+	792	NA	Intergenic	Intergenic	-43290	NM_002372	4124	Hs.432822	NM_002372	ENSG00000112893	MAN2A1	AMan II|GOLIM7|MANA2|MANII	mannosidase alpha class 2A member 1	protein-coding
10_siC_WDR5_peak_15378	chrX	130036731	130037507	+	791	NA	5' UTR (NM_006375, exon 1 of 15)	5' UTR (NM_006375, exon 1 of 15)	172	NM_182314	10495	Hs.171458	NM_006375	ENSG00000165675	ENOX2	APK1|COVA1|tNOX	ecto-NOX disulfide-thiol exchanger 2	protein-coding
10_siC_WDR5_peak_344	chr1	54303741	54304437	+	791	NA	promoter-TSS (NM_018087)	promoter-TSS (NM_018087)	-120	NM_001168551	55706	Hs.476525	NM_018087	ENSG00000058804	NDC1	NET3|TMEM48	NDC1 transmembrane nucleoporin	protein-coding
10_siC_WDR5_peak_7820	chr19	58919773	58920143	+	790	NA	promoter-TSS (NM_001318002)	promoter-TSS (NM_001318002)	-58	NM_173548	201514	Hs.439551	NM_173548	ENSG00000171574	ZNF584	-	zinc finger protein 584	protein-coding
10_siC_WDR5_peak_13016	chr7	915668	916741	+	790	NA	promoter-TSS (NM_015949)	promoter-TSS (NM_015949)	13	NM_015949	51608	Hs.107387	NM_015949	ENSG00000239857	GET4	C7orf20|CEE|CGI-20|TRC35	guided entry of tail-anchored proteins factor 4	protein-coding
10_siC_WDR5_peak_10540	chr3	149824747	149825325	+	790	NA	intron (NR_136187, intron 1 of 2)	intron (NR_136187, intron 1 of 2)	10806	NR_136187	105374313	Hs.151216	NR_136187		LOC105374313	-	uncharacterized LOC105374313	ncRNA
10_siC_WDR5_peak_4933	chr15	70283412	70283910	+	789	NA	Intergenic	Intergenic	88146	NR_030714	693214		NR_030714	ENSG00000207965	MIR629	MIRN629|hsa-mir-629|mir-629	microRNA 629	ncRNA
10_siC_WDR5_peak_2530	chr11	64038250	64039052	+	788	NA	intron (NM_004322, intron 2 of 2)	intron (NM_004322, intron 2 of 2)	-13160	NM_001170726	56834	Hs.523763	NM_020155	ENSG00000173264	GPR137	C11orf4|GPR137A|TM7SF1L1	G protein-coupled receptor 137	protein-coding
10_siC_WDR5_peak_2590	chr11	66405713	66406710	+	788	NA	promoter-TSS (NM_001198844)	promoter-TSS (NM_001198844)	37	NM_001198844	5936	Hs.523822	NM_002896	ENSG00000173933	RBM4	LARK|RBM4A|ZCCHC21|ZCRB3A	RNA binding motif protein 4	protein-coding
10_siC_WDR5_peak_6000	chr17	27046625	27047777	+	788	NA	promoter-TSS (NR_000013)	promoter-TSS (NR_000013)	198	NM_000984	6147	Hs.419463	NM_000984	ENSG00000198242	RPL23A	L23A|MDA20	ribosomal protein L23a	protein-coding
10_siC_WDR5_peak_1160	chr1	200708076	200709397	+	788	NA	promoter-TSS (NM_001297707)	promoter-TSS (NM_001297707)	36	NM_001297707	23271	Hs.23585	NM_203459	ENSG00000118200	CAMSAP2	CAMSAP1L1	calmodulin regulated spectrin associated protein family member 2	protein-coding
10_siC_WDR5_peak_4966	chr15	72929018	72929729	+	788	NA	promoter-TSS (NR_135684)	promoter-TSS (NR_135684)	-77	NR_135684	102723640	Hs.154829	NR_135684	ENSG00000259783	LINC02259	-	long intergenic non-protein coding RNA 2259	ncRNA
10_siC_WDR5_peak_10147	chr3	49141840	49142547	+	788	NA	promoter-TSS (NR_073590)	promoter-TSS (NR_073590)	-3	NM_005051	5859	Hs.79322	NM_005051	ENSG00000172053	QARS	GLNRS|MSCCA|PRO2195	glutaminyl-tRNA synthetase	protein-coding
10_siC_WDR5_peak_3653	chr12	114403730	114404372	+	788	NA	promoter-TSS (NM_001146699)	promoter-TSS (NM_001146699)	79	NM_001146698	9904	Hs.7482	NM_016196	ENSG00000122965	RBM19	Mrd1	RNA binding motif protein 19	protein-coding
10_siC_WDR5_peak_10716	chr3	196014376	196015092	+	787	NA	promoter-TSS (NM_001312673)	promoter-TSS (NM_001312673)	-137	NM_001312673	5130	Hs.135997	NM_005017	ENSG00000161217	PCYT1A	CCTA|CT|CTA|CTPCT|PCYT1|SMDCRD	phosphate cytidylyltransferase 1, choline, alpha	protein-coding
10_siC_WDR5_peak_14600	chr9	26946811	26947666	+	787	NA	promoter-TSS (NM_001031689)	promoter-TSS (NM_001031689)	2	NM_001031689	9373	Hs.27182	NM_004253	ENSG00000137055	PLAA	DOA1|NDMSBA|PLA2P|PLAP	phospholipase A2 activating protein	protein-coding
10_siC_WDR5_peak_8205	chr2	59640865	59641535	+	787	NA	Intergenic	L1PB1|LINE|L1	196357	NR_110219	101927285	Hs.570209	NR_110219	ENSG00000222030	LINC01793	-	long intergenic non-protein coding RNA 1793	ncRNA
10_siC_WDR5_peak_10447	chr3	127872036	127872704	+	787	NA	promoter-TSS (NM_021937)	promoter-TSS (NM_021937)	46	NM_021937	60678	Hs.477498	NM_021937	ENSG00000132394	EEFSEC	EFSEC|SELB	eukaryotic elongation factor, selenocysteine-tRNA specific	protein-coding
10_siC_WDR5_peak_7534	chr19	41816035	41816506	+	787	NA	promoter-TSS (NM_001346100)	promoter-TSS (NM_001346100)	-112	NM_001346100	90324	Hs.437497	NM_052848	ENSG00000142039	CCDC97	-	coiled-coil domain containing 97	protein-coding
10_siC_WDR5_peak_1808	chr10	70715530	70716382	+	787	NA	promoter-TSS (NM_001256910)	promoter-TSS (NM_001256910)	30	NM_004728	9188	Hs.223141	NM_004728	ENSG00000165732	DDX21	GUA|GURDB|RH-II/GU|RH-II/GuA	DExD-box helicase 21	protein-coding
10_siC_WDR5_peak_7242	chr19	12848150	12848585	+	786	NA	promoter-TSS (NM_004317)	promoter-TSS (NM_004317)	56	NM_004317	439	Hs.465985	NM_004317	ENSG00000198356	GET3	ARSA-I|ARSA1|ASNA-I|ASNA1|TRC40	guided entry of tail-anchored proteins factor 3, ATPase	protein-coding
10_siC_WDR5_peak_15208	chrX	40794870	40795196	+	786	NA	Intergenic	Intergenic	-102584	NR_027761	100132831	Hs.729923	NR_027761		LOC100132831	-	A20-binding inhibitor of NF-kappaB activation 2 pseudogene	pseudo
10_siC_WDR5_peak_5418	chr16	22385369	22386209	+	786	NA	promoter-TSS (NR_148970)	promoter-TSS (NR_148970)	151	NM_001802	1039	Hs.513430	NM_001802	ENSG00000140743	CDR2	CDR62|Yo	cerebellar degeneration related protein 2	protein-coding
10_siC_WDR5_peak_2356	chr11	32605142	32605786	+	785	NA	promoter-TSS (NM_006360)	promoter-TSS (NM_006360)	87	NM_001307929	10480	Hs.502244	NM_006360	ENSG00000149100	EIF3M	B5|GA17|PCID1|TANGO7|hfl-B5	eukaryotic translation initiation factor 3 subunit M	protein-coding
10_siC_WDR5_peak_4432	chr14	75469269	75470036	+	785	NA	promoter-TSS (NM_014239)	promoter-TSS (NM_014239)	28	NM_014239	8892	Hs.409137	NM_014239	ENSG00000119718	EIF2B2	EIF-2Bbeta|EIF2B	eukaryotic translation initiation factor 2B subunit beta	protein-coding
10_siC_WDR5_peak_613	chr1	95538020	95538902	+	785	NA	promoter-TSS (NM_001305242)	promoter-TSS (NM_001305242)	46	NR_131032	199857	Hs.408927	NM_144988	ENSG00000172339	ALG14	CMS15	ALG14 UDP-N-acetylglucosaminyltransferase subunit	protein-coding
10_siC_WDR5_peak_9873	chr22	46431794	46432173	+	785	NA	Intergenic	CpG	8765	NR_027036	100271722	Hs.528519	NR_027036		LINC00899	-	long intergenic non-protein coding RNA 899	ncRNA
10_siC_WDR5_peak_9324	chr20	44440919	44441556	+	785	NA	promoter-TSS (NR_104037)	promoter-TSS (NR_104037)	22	NM_001281741	11065	Hs.93002	NM_007019	ENSG00000175063	UBE2C	UBCH10|dJ447F3.2	ubiquitin conjugating enzyme E2 C	protein-coding
10_siC_WDR5_peak_2454	chr11	57479397	57480455	+	785	NA	promoter-TSS (NM_153450)	promoter-TSS (NM_153450)	-69	NM_001144012	51075	Hs.654965	NM_015959	ENSG00000213593	TMX2	CGI-31|PDIA12|PIG26|TXNDC14	thioredoxin related transmembrane protein 2	protein-coding
10_siC_WDR5_peak_331	chr1	53703908	53704461	+	784	NA	promoter-TSS (NM_002370)	promoter-TSS (NM_002370)	6	NM_002370	4116	Hs.421576	NM_002370	ENSG00000162385	MAGOH	MAGOH1|MAGOHA	mago homolog, exon junction complex subunit	protein-coding
10_siC_WDR5_peak_8227	chr2	62081407	62082363	+	784	NA	promoter-TSS (NM_001201543)	promoter-TSS (NM_001201543)	-690	NM_001201543	84140	Hs.440466	NM_032180	ENSG00000170264	FAM161A	RP28	FAM161 centrosomal protein A	protein-coding
10_siC_WDR5_peak_13022	chr7	1609388	1610032	+	784	NA	promoter-TSS (NM_001134340)	promoter-TSS (NM_001134340)	1	NR_027328	114796	Hs.436146	NR_021487	ENSG00000230487	PSMG3-AS1	-	PSMG3 antisense RNA 1 (head to head)	ncRNA
10_siC_WDR5_peak_5850	chr17	7146094	7146483	+	783	NA	promoter-TSS (NM_007278)	promoter-TSS (NM_007278)	-520	NM_007278	11337	Hs.647421	NM_007278	ENSG00000170296	GABARAP	ATG8A|GABARAP-a|MM46	GABA type A receptor-associated protein	protein-coding
10_siC_WDR5_peak_13419	chr7	71079976	71080444	+	783	NA	intron (NM_022479, intron 6 of 10)	intron (NM_022479, intron 6 of 10)	-307454	NR_037477	100500836		NR_037477	ENSG00000265878	MIR3914-1	-	microRNA 3914-1	ncRNA
10_siC_WDR5_peak_14085	chr8	37619741	37620455	+	781	NA	promoter-TSS (NM_001349346)	promoter-TSS (NM_001349346)	34	NM_001349349	11212	Hs.304792	NM_007198	ENSG00000147471	PLPBP	EPVB6D|PROSC	pyridoxal phosphate binding protein	protein-coding
10_siC_WDR5_peak_9425	chr20	57024726	57025064	+	781	NA	non-coding (NR_036633, exon 4 of 4)	non-coding (NR_036633, exon 4 of 4)	60610	NM_001195677	9217	Hs.182625	NM_004738	ENSG00000124164	VAPB	ALS8|VAMP-B|VAP-B	VAMP associated protein B and C	protein-coding
10_siC_WDR5_peak_8277	chr2	68289810	68290374	+	781	NA	promoter-TSS (NM_173177)	promoter-TSS (NM_173177)	44	NM_173177	10438	Hs.602900	NM_006333	ENSG00000197223	C1D	LRP1|Rrp47|SUN-CoR|SUNCOR|hC1D	C1D nuclear receptor corepressor	protein-coding
10_siC_WDR5_peak_14118	chr8	42698106	42698885	+	781	NA	promoter-TSS (NM_199003)	promoter-TSS (NM_199003)	-21	NM_199003	55145	Hs.7432	NM_018105	ENSG00000131931	THAP1	DYT6	THAP domain containing 1	protein-coding
10_siC_WDR5_peak_6729	chr17	79935152	79935986	+	778	NA	promoter-TSS (NM_001330528)	promoter-TSS (NM_001330528)	64	NM_024083	79058	Hs.298351	NM_024083	ENSG00000169696	ASPSCR1	ASPCR1|ASPL|ASPS|RCC17|TUG|UBXD9|UBXN9	ASPSCR1 tether for SLC2A4, UBX domain containing	protein-coding
10_siC_WDR5_peak_13298	chr7	44835733	44837042	+	778	NA	exon (NM_021130, exon 1 of 5)	exon (NM_021130, exon 1 of 5)	107	NM_001300981	5478	Hs.356331	NM_021130	ENSG00000196262	PPIA	CYPA|CYPH|HEL-S-69p	peptidylprolyl isomerase A	protein-coding
10_siC_WDR5_peak_5663	chr16	69458026	69458938	+	777	NA	promoter-TSS (NM_030579)	promoter-TSS (NM_030579)	-16	NM_030579	80777	Hs.461131	NM_030579	ENSG00000103018	CYB5B	CYB5-M|CYPB5M|OMB5	cytochrome b5 type B	protein-coding
10_siC_WDR5_peak_13070	chr7	5938038	5938734	+	777	NA	promoter-TSS (NM_015622)	promoter-TSS (NM_015622)	22	NM_015622	51622	Hs.530000	NM_015622	ENSG00000122674	CCZ1	C7orf28A|CCZ1A|CGI-43|H_DJ1163J12.2	CCZ1 homolog, vacuolar protein trafficking and biogenesis associated	protein-coding
10_siC_WDR5_peak_14033	chr8	27950071	27950946	+	777	NA	promoter-TSS (NM_001284220)	promoter-TSS (NM_001284220)	-76	NM_001284226	55140	Hs.491336	NM_018091	ENSG00000134014	ELP3	KAT9	elongator acetyltransferase complex subunit 3	protein-coding
10_siC_WDR5_peak_5415	chr16	22019141	22019711	+	777	NA	promoter-TSS (NM_001164579)	promoter-TSS (NM_001164579)	-6	NM_001164579	730094	Hs.498890	NM_173501	ENSG00000185716	MOSMO	ATTHOG|BC030336|C16orf52	modulator of smoothened	protein-coding
10_siC_WDR5_peak_3415	chr12	72602782	72603193	+	776	NA	Intergenic	Intergenic	-63542	NM_013381	29953	Hs.199814	NM_013381	ENSG00000072657	TRHDE	PAP-II|PGPEP2|TRH-DE	thyrotropin releasing hormone degrading enzyme	protein-coding
10_siC_WDR5_peak_12352	chr6	33256786	33257693	+	776	NA	promoter-TSS (NM_001164267).4	promoter-TSS (NM_001164267).4	-135	NM_001265596	10471	Hs.446374	NM_014260	ENSG00000204220	PFDN6	H2-KE2|HKE2|KE-2|PFD6	prefoldin subunit 6	protein-coding
10_siC_WDR5_peak_1830	chr10	74114240	74114936	+	776	NA	promoter-TSS (NR_157570)	promoter-TSS (NR_157570)	89	NR_157570	54788	Hs.500013	NM_017626	ENSG00000148719	DNAJB12	DJ10	DnaJ heat shock protein family (Hsp40) member B12	protein-coding
10_siC_WDR5_peak_5440	chr16	27279825	27280532	+	776	NA	promoter-TSS (NM_145080)	promoter-TSS (NM_145080)	-85	NM_145080	197370	Hs.284295	NM_145080	ENSG00000169189	NSMCE1	NSE1	NSE1 homolog, SMC5-SMC6 complex component	protein-coding
10_siC_WDR5_peak_6548	chr17	70771809	70772491	+	776	NA	intron (NM_001352691, intron 7 of 10)	intron (NM_001352691, intron 7 of 10)	-135539	NR_033876	400619	Hs.447555	NR_033876	ENSG00000227036	LINC00511	LCAL5|onco-lncRNA-12	long intergenic non-protein coding RNA 511	ncRNA
10_siC_WDR5_peak_6330	chr17	49012202	49012954	+	776	NA	Intergenic	Intergenic	-67239	NM_001243877	10140	Hs.703321	NM_005749	ENSG00000141232	TOB1	APRO5|APRO6|PIG49|TOB|TROB|TROB1	transducer of ERBB2, 1	protein-coding
10_siC_WDR5_peak_7194	chr19	10530622	10531218	+	775	NA	promoter-TSS (NM_001111307)	promoter-TSS (NM_001111307)	-294	NM_001111307	5141	Hs.89901	NM_006202	ENSG00000065989	PDE4A	DPDE2|PDE4|PDE46	phosphodiesterase 4A	protein-coding
10_siC_WDR5_peak_8338	chr2	74681974	74682418	+	775	NA	promoter-TSS (NR_037849)	promoter-TSS (NR_037849)	-18	NM_031288	83444	Hs.410786	NM_031288	ENSG00000115274	INO80B	HMGA1L4|HMGIYL4|IES2|PAP-1BP|PAPA-1|PAPA1|ZNHIT4|hIes2	INO80 complex subunit B	protein-coding
10_siC_WDR5_peak_15010	chr9	131084443	131085393	+	775	NA	promoter-TSS (NM_001305942)	promoter-TSS (NM_001305942)	141	NM_001329863	26995	Hs.632685	NM_015679	ENSG00000167112	TRUB2	CLONE24922	TruB pseudouridine synthase family member 2	protein-coding
10_siC_WDR5_peak_9227	chr20	32156197	32156666	+	774	NA	intron (NM_001039709, intron 1 of 10)	intron (NM_001039709, intron 1 of 10)	6260	NM_001039709	9139	Hs.153934	NM_005093	ENSG00000078699	CBFA2T2	EHT|MTGR1|ZMYND3|p85	CBFA2/RUNX1 partner transcriptional co-repressor 2	protein-coding
10_siC_WDR5_peak_627	chr1	99744993	99745438	+	774	NA	intron (NM_014839, intron 1 of 6)	intron (NM_014839, intron 1 of 6)	15367	NM_014839	9890	Hs.13245	NM_014839	ENSG00000117600	PLPPR4	LPPR4|LPR4|PHP1|PRG-1|PRG1	phospholipid phosphatase related 4	protein-coding
10_siC_WDR5_peak_2204	chr11	535375	535864	+	774	NA	promoter-TSS (NM_176795)	promoter-TSS (NM_176795)	-43	NM_001318054	3265	Hs.37003	NM_005343	ENSG00000174775	HRAS	C-BAS/HAS|C-H-RAS|C-HA-RAS1|CTLO|H-RASIDX|HAMSV|HRAS1|KRAS|KRAS2|Ki-Ras|RASH1|RASK2|c-K-ras|c-Ki-ras|p21ras	HRas proto-oncogene, GTPase	protein-coding
10_siC_WDR5_peak_2078	chr10	114737107	114737667	+	774	NA	intron (NM_001363501, intron 4 of 13)	intron (NM_001363501, intron 4 of 13)	27378	NM_001198530	6934	Hs.593995	NM_030756	ENSG00000148737	TCF7L2	TCF-4|TCF4	transcription factor 7 like 2	protein-coding
10_siC_WDR5_peak_819	chr1	151042885	151043478	+	773	NA	promoter-TSS (NM_001323912)	promoter-TSS (NM_001323912)	-56	NM_001323908	126626	Hs.15671	NM_144618	ENSG00000143458	GABPB2	GABPB-2	GA binding protein transcription factor subunit beta 2	protein-coding
10_siC_WDR5_peak_920	chr1	156474705	156475329	+	772	NA	Intergenic	CpG	-4450	NM_005920	4209	Hs.314327	NM_005920	ENSG00000116604	MEF2D	-	myocyte enhancer factor 2D	protein-coding
10_siC_WDR5_peak_4700	chr15	41049182	41049624	+	772	NA	Intergenic	Intergenic	-1869	NM_001323896	55177	Hs.511067	NM_018145	ENSG00000137824	RMDN3	FAM82A2|FAM82C|RMD-3|RMD3|ptpip51	regulator of microtubule dynamics 3	protein-coding
10_siC_WDR5_peak_5031	chr15	77389724	77390201	+	772	NA	Intergenic	Intergenic	-26511	NM_005724	10099	Hs.744863	NM_005724	ENSG00000140391	TSPAN3	TM4-A|TM4SF8|TSPAN-3	tetraspanin 3	protein-coding
10_siC_WDR5_peak_3826	chr12	133532523	133533132	+	771	NA	promoter-TSS (NM_183238)	promoter-TSS (NM_183238)	65	NM_183238	100289635	Hs.29698	NM_183238	ENSG00000196458	ZNF605	-	zinc finger protein 605	protein-coding
10_siC_WDR5_peak_2282	chr11	13298754	13299524	+	771	NA	promoter-TSS (NM_001030273)	promoter-TSS (NM_001030273)	-135	NR_147786	406	Hs.65734	NM_001178	ENSG00000133794	ARNTL	BMAL1|BMAL1c|JAP3|MOP3|PASD3|TIC|bHLHe5	aryl hydrocarbon receptor nuclear translocator like	protein-coding
10_siC_WDR5_peak_4568	chr14	100340042	100340390	+	771	NA	intron (NM_004434, intron 3 of 21)	L2b|LINE|L2	80466	NM_001008707	2009	Hs.12451	NM_004434	ENSG00000066629	EML1	BH|ELP79|EMAP|EMAPL|HuEMAP	EMAP like 1	protein-coding
10_siC_WDR5_peak_6181	chr17	42052274	42052627	+	770	NA	intron (NM_004160, intron 1 of 6)	L3|LINE|CR1	29387	NM_004160	5697	Hs.169249	NM_004160	ENSG00000131096	PYY	PYY-I|PYY1	peptide YY	protein-coding
10_siC_WDR5_peak_3283	chr12	56223174	56223741	+	768	NA	promoter-TSS (NR_036476)	promoter-TSS (NR_036476)	-37	NM_032364	85406	Hs.709320	NM_032364	ENSG00000135392	DNAJC14	DNAJ|DRIP78|HDJ3|LIP6	DnaJ heat shock protein family (Hsp40) member C14	protein-coding
10_siC_WDR5_peak_10348	chr3	107241465	107242317	+	768	NA	promoter-TSS (NM_020235)	promoter-TSS (NM_020235)	82	NM_020235	56987	Hs.124366	NM_020235	ENSG00000114439	BBX	ARTC1|HBP2|HSPC339|MDS001	BBX high mobility group box domain containing	protein-coding
10_siC_WDR5_peak_2426	chr11	46638435	46639513	+	767	NA	promoter-TSS (NM_173811)	promoter-TSS (NM_173811)	148	NM_001346317	9776	Hs.127403	NM_014741	ENSG00000175224	ATG13	KIAA0652|PARATARG8	autophagy related 13	protein-coding
10_siC_WDR5_peak_1495	chr1	241610432	241610898	+	767	NA	Intergenic	Intergenic	72420	NM_000143	2271	Hs.592490	NM_000143	ENSG00000091483	FH	FMRD|HLRCC|HsFH|LRCC|MCL|MCUL1	fumarate hydratase	protein-coding
10_siC_WDR5_peak_9942	chr3	10028314	10028885	+	766	NA	promoter-TSS (NR_103821)	promoter-TSS (NR_103821)	22	NR_103821	442075	Hs.690469	NM_001013730		EMC3-AS1	-	EMC3 antisense RNA 1	ncRNA
10_siC_WDR5_peak_2131	chr10	123899167	123899550	+	766	NA	intron (NM_001291879, intron 2 of 16)	intron (NM_001291879, intron 2 of 16)	-23787	NM_006997	10579	Hs.501252	NM_006997	ENSG00000138162	TACC2	AZU-1|ECTACC	transforming acidic coiled-coil containing protein 2	protein-coding
10_siC_WDR5_peak_30	chr1	2457549	2457960	+	766	NA	intron (NM_018216, intron 1 of 18)	CpG	281	NM_018216	55229	Hs.26156	NM_018216	ENSG00000157881	PANK4	-	pantothenate kinase 4	protein-coding
10_siC_WDR5_peak_1074	chr1	179851405	179852163	+	766	NA	exon (NM_015602, exon 1 of 10)	exon (NM_015602, exon 1 of 10)	607	NM_015602	26092	Hs.496459	NM_015602	ENSG00000143337	TOR1AIP1	LAP1|LAP1B|LGMD2Y	torsin 1A interacting protein 1	protein-coding
10_siC_WDR5_peak_7241	chr19	12847604	12848035	+	766	NA	promoter-TSS (NM_004317)	promoter-TSS (NM_004317)	-492	NM_004317	439	Hs.465985	NM_004317	ENSG00000198356	GET3	ARSA-I|ARSA1|ASNA-I|ASNA1|TRC40	guided entry of tail-anchored proteins factor 3, ATPase	protein-coding
10_siC_WDR5_peak_1753	chr10	53459162	53460128	+	765	NA	promoter-TSS (NM_015235)	promoter-TSS (NM_015235)	-290	NM_015235	23283	Hs.591358	NM_015235	ENSG00000177613	CSTF2T	CstF-64T	cleavage stimulation factor subunit 2 tau variant	protein-coding
10_siC_WDR5_peak_8458	chr2	99797317	99798011	+	765	NA	promoter-TSS (NM_145212)	promoter-TSS (NM_145212)	17	NM_145212	51263	Hs.346736	NM_016503	ENSG00000185414	MRPL30	L28MT|L30MT|MRP-L28|MRP-L30|MRPL28|MRPL28M|RPML28	mitochondrial ribosomal protein L30	protein-coding
10_siC_WDR5_peak_5453	chr16	28722643	28723200	+	765	NA	5' UTR (NM_001267574, exon 1 of 20)	5' UTR (NM_001267574, exon 1 of 20)	180	NM_001317856	728689	Hs.567374	NM_001099661	ENSG00000205609	EIF3CL	-	eukaryotic translation initiation factor 3 subunit C like	protein-coding
10_siC_WDR5_peak_3677	chr12	118454405	118454947	+	765	NA	exon (NM_007370, exon 1 of 11)	exon (NM_007370, exon 1 of 11)	168	NM_007370	5985	Hs.731908	NM_007370	ENSG00000111445	RFC5	RFC36	replication factor C subunit 5	protein-coding
10_siC_WDR5_peak_4134	chr13	111367492	111368410	+	765	NA	exon (NM_005537, exon 1 of 2)	intron (NM_001267728, intron 1 of 1)	167	NM_001267728	3621	Hs.46700	NM_005537	ENSG00000153487	ING1	p24ING1c|p33|p33ING1|p33ING1b|p47|p47ING1a	inhibitor of growth family member 1	protein-coding
10_siC_WDR5_peak_5114	chr15	86337762	86338456	+	765	NA	promoter-TSS (NM_022480)	promoter-TSS (NM_022480)	47	NM_022480	64410	Hs.498371	NM_022480	ENSG00000183655	KLHL25	ENC-2|ENC2	kelch like family member 25	protein-coding
10_siC_WDR5_peak_12669	chr6	100912736	100913145	+	765	NA	Intergenic	CpG	-1389	NM_005068	6492	Hs.520293	NM_005068	ENSG00000112246	SIM1	bHLHe14	SIM bHLH transcription factor 1	protein-coding
10_siC_WDR5_peak_7203	chr19	11039115	11039759	+	765	NA	promoter-TSS (NM_001321440)	promoter-TSS (NM_001321440)	-50	NM_138358	90580	Hs.164026	NM_138358	ENSG00000142444	TIMM29	C19orf52|TIM29	translocase of inner mitochondrial membrane 29	protein-coding
10_siC_WDR5_peak_5993	chr17	26698553	26699673	+	765	NA	exon (NM_015077, exon 1 of 13)	exon (NM_015077, exon 1 of 13)	398	NM_015077	23098	Hs.743510	NM_015077	ENSG00000004139	SARM1	MyD88-5|SAMD2|SARM	sterile alpha and TIR motif containing 1	protein-coding
10_siC_WDR5_peak_7920	chr2	11605624	11606524	+	764	NA	non-coding (NR_103490, exon 1 of 5)	non-coding (NR_103490, exon 1 of 5)	213	NM_212540	1876	Hs.603093	NM_198256	ENSG00000169016	E2F6	E2F-6	E2F transcription factor 6	protein-coding
10_siC_WDR5_peak_12323	chr6	31707384	31708046	+	764	NA	promoter-TSS (NM_172166).5	promoter-TSS (NM_172166).5	-10	NM_025259	4439	Hs.647011	NM_002441	ENSG00000204410	MSH5	G7|MUTSH5|NG23|POF13	mutS homolog 5	protein-coding
10_siC_WDR5_peak_15062	chr9	134248591	134249297	+	764	NA	Intergenic	CpG	-56533	NM_013318	84726	Hs.743955	NM_013318	ENSG00000130723	PRRC2B	BAT2L|BAT2L1|KIAA0515|LQFBS-1	proline rich coiled-coil 2B	protein-coding
10_siC_WDR5_peak_5238	chr16	734067	734677	+	764	NA	promoter-TSS (NM_001323919)	promoter-TSS (NM_001323919)	-38	NM_001323922	339123	Hs.533771	NM_001005920	ENSG00000161999	JMJD8	C16orf20|PP14397	jumonji domain containing 8	protein-coding
10_siC_WDR5_peak_15291	chrX	70752693	70753684	+	763	NA	intron (NM_181673, intron 1 of 21)	intron (NM_181673, intron 1 of 21)	234	NM_181673	8473	Hs.405410	NM_003605	ENSG00000147162	OGT	HINCUT-1|HRNT1|MRX106|O-GLCNAC|OGT1	O-linked N-acetylglucosamine (GlcNAc) transferase	protein-coding
10_siC_WDR5_peak_5848	chr17	7142583	7143294	+	762	NA	promoter-TSS (NM_024297)	promoter-TSS (NM_024297)	-162	NM_024297	79142	Hs.644724	NM_024297	ENSG00000040633	PHF23	hJUNE-1b	PHD finger protein 23	protein-coding
10_siC_WDR5_peak_12277	chr6	28219792	28220254	+	762	NA	promoter-TSS (NM_019110)	promoter-TSS (NM_019110)	24	NM_019110	387032	Hs.44720	NM_019110	ENSG00000187626	ZKSCAN4	P1P373C6|ZNF307|ZNF427|ZSCAN36	zinc finger with KRAB and SCAN domains 4	protein-coding
10_siC_WDR5_peak_1395	chr1	227751072	227751678	+	762	NA	non-coding (NR_102302, exon 1 of 6)	non-coding (NR_102302, exon 1 of 6)	118	NM_001367910	339500	Hs.30323	NM_032755	ENSG00000181450	ZNF678	-	zinc finger protein 678	protein-coding
10_siC_WDR5_peak_2670	chr11	75525745	75526909	+	762	NA	promoter-TSS (NR_144531)	promoter-TSS (NR_144531)	72	NM_003369	7405	Hs.202470	NM_003369	ENSG00000198382	UVRAG	DHTX|VPS38|p63	UV radiation resistance associated	protein-coding
10_siC_WDR5_peak_1608	chr10	15902133	15902958	+	762	NA	promoter-TSS (NM_001318330)	promoter-TSS (NM_001318330)	-13	NM_001318330	80013	Hs.158870	NM_024948	ENSG00000148481	MINDY3	C10orf97|CARP|DERP5|FAM188A|MST126|MSTP126|my042	MINDY lysine 48 deubiquitinase 3	protein-coding
10_siC_WDR5_peak_7685	chr19	50321248	50321715	+	762	NA	promoter-TSS (NM_030973)	promoter-TSS (NM_030973)	-55	NM_030973	81857	Hs.656639	NM_030973	ENSG00000104973	MED25	ACID1|ARC92|BVSYS|CMT2B2|P78|PTOV2|TCBAP0758	mediator complex subunit 25	protein-coding
10_siC_WDR5_peak_839	chr1	153699970	153700576	+	761	NA	promoter-TSS (NM_001324475)	promoter-TSS (NM_001324475)	-253	NM_001324475	65123	Hs.438723	NM_023015	ENSG00000143624	INTS3	C1orf193|C1orf60|INT3|SOSS-A|SOSSA	integrator complex subunit 3	protein-coding
10_siC_WDR5_peak_1396	chr1	227922646	227923397	+	761	NA	promoter-TSS (NM_023007)	promoter-TSS (NM_023007)	91	NM_001161465	65094	Hs.555974	NM_023007	ENSG00000081692	JMJD4	-	jumonji domain containing 4	protein-coding
10_siC_WDR5_peak_11940	chr5	168197014	168197473	+	761	NA	intron (NM_001271946, intron 14 of 35)	intron (NM_001271946, intron 14 of 35)	-1983	NR_029632	407001		NR_029632	ENSG00000207739	MIR218-2	MIRN218-2|mir-218-2	microRNA 218-2	ncRNA
10_siC_WDR5_peak_4869	chr15	64648096	64648742	+	760	NA	promoter-TSS (NM_022048)	promoter-TSS (NM_022048)	-47	NM_001329605	53944	Hs.646508	NM_022048	ENSG00000169118	CSNK1G1	CK1gamma1	casein kinase 1 gamma 1	protein-coding
10_siC_WDR5_peak_13113	chr7	13451291	13451807	+	760	NA	Intergenic	Intergenic	574590	NM_001163152	2115	Hs.22634	NM_004956	ENSG00000006468	ETV1	ER81	ETS variant 1	protein-coding
10_siC_WDR5_peak_4123	chr13	109440053	109440763	+	760	NA	intron (NM_015011, intron 5 of 34)	intron (NM_015011, intron 5 of 34)	158449	NM_001198950	23026	Hs.656587	NM_015011	ENSG00000041515	MYO16	MYAP3|MYR8|Myo16b|NYAP3|PPP1R107	myosin XVI	protein-coding
10_siC_WDR5_peak_3669	chr12	117416932	117417269	+	760	NA	non-coding (NR_103809, exon 4 of 4)	non-coding (NR_103809, exon 4 of 4)	8042	NR_103809	100506551	Hs.657861	NR_103809	ENSG00000257279	LOC100506551	-	uncharacterized LOC100506551	ncRNA
10_siC_WDR5_peak_6700	chr17	79268816	79269561	+	760	NA	promoter-TSS (NM_138570)	promoter-TSS (NM_138570)	-81	NM_001037984	124565	Hs.352240	NM_138570	ENSG00000157637	SLC38A10	PP1744	solute carrier family 38 member 10	protein-coding
10_siC_WDR5_peak_11943	chr5	168215041	168215529	+	759	NA	intron (NM_001271946, intron 11 of 35)	intron (NM_001271946, intron 11 of 35)	-20025	NR_029632	407001		NR_029632	ENSG00000207739	MIR218-2	MIRN218-2|mir-218-2	microRNA 218-2	ncRNA
10_siC_WDR5_peak_12026	chr5	177026846	177027400	+	758	NA	promoter-TSS (NM_007255)	promoter-TSS (NM_007255)	-10	NM_007255	11285	Hs.455109	NM_007255	ENSG00000027847	B4GALT7	EDSP1|EDSSLA|EDSSPD1|XGALT1|XGPT|XGPT1	beta-1,4-galactosyltransferase 7	protein-coding
10_siC_WDR5_peak_3829	chr12	133656596	133657754	+	758	NA	5' UTR (NM_001300776, exon 1 of 4)	5' UTR (NM_001300776, exon 1 of 4)	386	NM_001300776	7699	Hs.181552	NM_003440	ENSG00000196387	ZNF140	pHZ-39	zinc finger protein 140	protein-coding
10_siC_WDR5_peak_8968	chr2	224821996	224822431	+	758	NA	promoter-TSS (NM_022915)	promoter-TSS (NM_022915)	33	NM_022915	65080	Hs.203559	NM_022915	ENSG00000135900	MRPL44	COXPD16|L44MT|MRP-L44	mitochondrial ribosomal protein L44	protein-coding
10_siC_WDR5_peak_5840	chr17	5389103	5390292	+	758	NA	promoter-TSS (NM_001304777)	promoter-TSS (NM_001304777)	3	NM_001258220	79003	Hs.267194	NM_024039	ENSG00000167842	MIS12	2510025F08Rik|KNTC2AP|MTW1|hMis12	MIS12 kinetochore complex component	protein-coding
10_siC_WDR5_peak_1009	chr1	166808294	166809711	+	758	NA	intron (NM_001314014, intron 1 of 3)	CpG	290	NM_001314014	57645	Hs.432752	NM_017542	ENSG00000143157	POGK	BASS2|KRBOX2|LST003	pogo transposable element derived with KRAB domain	protein-coding
10_siC_WDR5_peak_1502	chr1	243264893	243265281	+	756	NA	promoter-TSS (NR_029401)	promoter-TSS (NR_029401)	-41	NR_029401	731275	Hs.722350	NR_029401	ENSG00000214837	LINC01347	-	long intergenic non-protein coding RNA 1347	ncRNA
10_siC_WDR5_peak_598	chr1	94344442	94345022	+	756	NA	promoter-TSS (NM_014597)	promoter-TSS (NM_014597)	30	NM_014597	30836	Hs.85769	NM_014597	ENSG00000067334	DNTTIP2	ERBP|FCF2|HSU15552|LPTS-RP2|TdIF2	deoxynucleotidyltransferase terminal interacting protein 2	protein-coding
10_siC_WDR5_peak_3781	chr12	125534019	125534521	+	756	NA	Intergenic	CpG	-15711	NM_001319840	65985	Hs.656073	NM_023928	ENSG00000081760	AACS	ACSF1|SUR-5	acetoacetyl-CoA synthetase	protein-coding
10_siC_WDR5_peak_10705	chr3	194853813	194854146	+	755	NA	intron (NM_152531, intron 3 of 3)	intron (NM_152531, intron 3 of 3)	1330	NR_036089	100422926		NR_036089	ENSG00000265333	MIR3137	-	microRNA 3137	ncRNA
10_siC_WDR5_peak_2408	chr11	45070425	45071368	+	755	NA	Intergenic	Intergenic	-44668	NM_001359633	56981	Hs.178715	NM_001256695	ENSG00000019485	PRDM11	PFM8	PR/SET domain 11	protein-coding
10_siC_WDR5_peak_12887	chr6	147523467	147524467	+	755	NA	intron (NR_034115, intron 1 of 10)	intron (NR_034115, intron 1 of 10)	-1527	NM_001127715	134957	Hs.86320	NM_139244	ENSG00000164506	STXBP5	LGL3|LLGL3|Nbla04300	syntaxin binding protein 5	protein-coding
10_siC_WDR5_peak_6293	chr17	47841281	47841889	+	755	NA	promoter-TSS (NM_030802)	promoter-TSS (NM_030802)	-92	NM_030802	81558	Hs.514308	NM_030802	ENSG00000121104	FAM117A	-	family with sequence similarity 117 member A	protein-coding
10_siC_WDR5_peak_912	chr1	156182566	156183131	+	755	NA	promoter-TSS (NM_001199653)	promoter-TSS (NM_001199653)	69	NM_001199653	11243	Hs.530479	NM_007221	ENSG00000160783	PMF1	-	polyamine modulated factor 1	protein-coding
10_siC_WDR5_peak_2560	chr11	65339570	65340349	+	754	NA	promoter-TSS (NM_001098784)	promoter-TSS (NM_001098784)	-50	NM_152832	23625	Hs.731854	NM_152832	ENSG00000176973	FAM89B	LRAP25|MTVR|MTVR1	family with sequence similarity 89 member B	protein-coding
10_siC_WDR5_peak_4959	chr15	71184500	71185400	+	754	NA	promoter-TSS (NM_020147)	promoter-TSS (NM_020147)	168	NM_001199018	54839	Hs.12692	NM_017691	ENSG00000137821	LRRC49	PGs4	leucine rich repeat containing 49	protein-coding
10_siC_WDR5_peak_14663	chr9	37800509	37801261	+	754	NA	promoter-TSS (NM_024345)	promoter-TSS (NM_024345)	91	NM_024345	79269	Hs.118394	NM_024345	ENSG00000122741	DCAF10	WDR32	DDB1 and CUL4 associated factor 10	protein-coding
10_siC_WDR5_peak_11052	chr4	100815278	100815871	+	753	NA	promoter-TSS (NM_021970)	promoter-TSS (NM_021970)	10	NM_021970	8649	Hs.433332	NM_021970	ENSG00000109270	LAMTOR3	MAP2K1IP1|MAPBP|MAPKSP1|MP1|PRO0633|Ragulator3	late endosomal/lysosomal adaptor, MAPK and MTOR activator 3	protein-coding
10_siC_WDR5_peak_13942	chr8	11058687	11059464	+	753	NA	promoter-TSS (NR_138152)	promoter-TSS (NR_138152)	-200	NR_138154	286046	Hs.657083	NM_173683	ENSG00000171044	XKR6	C8orf21|C8orf5|C8orf7|XRG6	XK related 6	protein-coding
10_siC_WDR5_peak_9696	chr22	25889296	25889816	+	753	NA	Intergenic	Intergenic	37943	NR_106875	102466198		NR_106875	ENSG00000277872	MIR6817	hsa-mir-6817	microRNA 6817	ncRNA
10_siC_WDR5_peak_6454	chr17	59940318	59941256	+	752	NA	5' UTR (NM_032043, exon 1 of 20)	5' UTR (NM_032043, exon 1 of 20)	133	NM_032043	83990	Hs.128903	NM_032043	ENSG00000136492	BRIP1	BACH1|FANCJ|OF	BRCA1 interacting protein C-terminal helicase 1	protein-coding
10_siC_WDR5_peak_15420	chrX	153672412	153672958	+	752	NA	TTS (NM_001493)	TTS (NM_001493)	197	NM_004699	9130	Hs.54277	NM_004699	ENSG00000071859	FAM50A	9F|DXS9928E|HXC-26|HXC26|XAP5	family with sequence similarity 50 member A	protein-coding
10_siC_WDR5_peak_13235	chr7	35534865	35535280	+	752	NA	Intergenic	Intergenic	181606	NR_038864	401324	Hs.377034	NR_038864		LOC401324	-	uncharacterized LOC401324	ncRNA
10_siC_WDR5_peak_1211	chr1	205160386	205161145	+	751	NA	intron (NM_199462, intron 1 of 11)	intron (NM_199462, intron 1 of 11)	20065	NM_199462	25778	Hs.6874	NM_015375	ENSG00000133059	DSTYK	CAKUT1|DustyPK|HDCMD38P|RIP5|RIPK5|SPG23	dual serine/threonine and tyrosine protein kinase	protein-coding
10_siC_WDR5_peak_8405	chr2	85999188	85999869	+	751	NA	intron (NM_032827, intron 2 of 2)	GC_rich|Low_complexity|Low_complexity	11272	NR_106719	102466516		NR_106719	ENSG00000278783	MIR6071	hsa-mir-6071	microRNA 6071	ncRNA
10_siC_WDR5_peak_7188	chr19	10362487	10363208	+	749	NA	promoter-TSS (NM_015956)	promoter-TSS (NM_015956)	-43	NM_015956	51073	Hs.279652	NM_015956	ENSG00000105364	MRPL4	CGI-28|L4mt	mitochondrial ribosomal protein L4	protein-coding
10_siC_WDR5_peak_5306	chr16	3507596	3508267	+	749	NA	promoter-TSS (NM_001317095)	promoter-TSS (NM_001317095)	-114	NM_001317098	79903	Hs.513296	NM_024845	ENSG00000122390	NAA60	HAT4|NAT15|NatF|hNaa60	N(alpha)-acetyltransferase 60, NatF catalytic subunit	protein-coding
10_siC_WDR5_peak_7346	chr19	19249022	19249521	+	749	NA	promoter-TSS (NM_001256766)	promoter-TSS (NM_001256766)	16	NM_017814	54929	Hs.631629	NM_017814	ENSG00000064545	TMEM161A	AROS-29	transmembrane protein 161A	protein-coding
10_siC_WDR5_peak_9299	chr20	40246556	40247549	+	749	NA	promoter-TSS (NM_032221)	promoter-TSS (NM_032221)	-36	NM_032221	84181	Hs.740645	NM_032221	ENSG00000124177	CHD6	CHD-6|CHD5|RIGB	chromodomain helicase DNA binding protein 6	protein-coding
10_siC_WDR5_peak_1834	chr10	74927594	74928195	+	749	NA	promoter-TSS (NM_001135752)	promoter-TSS (NM_001135752)	17	NM_173348	317662	Hs.408577	NM_173348	ENSG00000138286	FAM149B1	KIAA0974	family with sequence similarity 149 member B1	protein-coding
10_siC_WDR5_peak_4170	chr14	21851567	21852659	+	749	NA	promoter-TSS (NM_007192)	promoter-TSS (NM_007192)	65	NM_007192	11198	Hs.213724	NM_007192	ENSG00000092201	SUPT16H	CDC68|FACTP140|SPT16|SPT16/CDC68	SPT16 homolog, facilitates chromatin remodeling subunit	protein-coding
10_siC_WDR5_peak_14191	chr8	71314098	71315116	+	749	NA	intron (NM_001321703, intron 1 of 22)	CpG	1018	NM_001321713	10499	Hs.446678	NM_006540	ENSG00000140396	NCOA2	GRIP1|KAT13C|NCoA-2|SRC2|TIF2|bHLHe75	nuclear receptor coactivator 2	protein-coding
10_siC_WDR5_peak_4505	chr14	90849450	90849986	+	749	NA	Intergenic	CpG	-13128	NM_001363669	801	Hs.282410	NM_006888	ENSG00000198668	CALM1	CALML2|CAM2|CAM3|CAMB|CAMC|CAMI|CAMIII|CPVT4|DD132|LQT14|PHKD|caM	calmodulin 1	protein-coding
10_siC_WDR5_peak_9031	chr2	238968933	238969841	+	748	NA	promoter-TSS (NM_016510)	promoter-TSS (NM_016510)	-255	NM_016510	51540	Hs.731909	NM_016510	ENSG00000132330	SCLY	SCL|hSCL	selenocysteine lyase	protein-coding
10_siC_WDR5_peak_11312	chr5	892614	893257	+	748	NA	promoter-TSS (NM_023924)	promoter-TSS (NM_023924)	-19	NM_023924	65980	Hs.449278	NM_023924	ENSG00000028310	BRD9	LAVS3040|PRO9856	bromodomain containing 9	protein-coding
10_siC_WDR5_peak_15309	chrX	75364768	75365590	+	748	NA	Intergenic	CpG	-27585	NM_001300888	51260	Hs.370100	NM_016500	ENSG00000102390	PBDC1	CXorf26	polysaccharide biosynthesis domain containing 1	protein-coding
10_siC_WDR5_peak_2065	chr10	111727035	111727418	+	748	NA	intron (NR_038943, intron 2 of 4)	intron (NR_038943, intron 2 of 4)	-28905	NM_001320591	120	Hs.501012	NM_001121	ENSG00000148700	ADD3	ADDL|CPSQ3	adducin 3	protein-coding
10_siC_WDR5_peak_12835	chr6	135375467	135376139	+	747	NA	exon (NM_001145158, exon 1 of 17)	exon (NM_001145158, exon 1 of 17)	157	NM_001145158	10767	Hs.378532	NM_006620	ENSG00000112339	HBS1L	EF-1a|ERFS|HBS1|HSPC276|eRF3c	HBS1 like translational GTPase	protein-coding
10_siC_WDR5_peak_9255	chr20	34359536	34360442	+	747	NA	promoter-TSS (NM_016436)	promoter-TSS (NM_016436)	52	NM_016436	51230	Hs.517044	NM_016436	ENSG00000025293	PHF20	C20orf104|GLEA2|HCA58|NZF|TDRD20A|TZP	PHD finger protein 20	protein-coding
10_siC_WDR5_peak_2007	chr10	103245651	103246217	+	747	NA	intron (NM_003939, intron 3 of 13)	intron (NM_003939, intron 3 of 13)	102080	NM_001174084	27343	Hs.523230	NM_013274	ENSG00000166169	POLL	BETAN|POLKAPPA	DNA polymerase lambda	protein-coding
10_siC_WDR5_peak_5089	chr15	83418794	83419847	+	747	NA	promoter-TSS (NR_110099)	promoter-TSS (NR_110099)	4	NR_110099	100505616	Hs.513091	NR_110096	ENSG00000250988	SNHG21	FSD2-AS1|SCARNA15HG	small nucleolar RNA host gene 21	ncRNA
10_siC_WDR5_peak_3794	chr12	129308458	129308870	+	746	NA	promoter-TSS (NM_145648)	promoter-TSS (NM_145648)	-161	NM_145648	121260	Hs.507260	NM_145648	ENSG00000139370	SLC15A4	FP12591|PHT1|PTR4	solute carrier family 15 member 4	protein-coding
10_siC_WDR5_peak_13435	chr7	73097298	73098185	+	746	NA	promoter-TSS (NR_045512)	promoter-TSS (NR_045512)	42	NM_032317	84277	Hs.647046	NM_032317	ENSG00000176410	DNAJC30	WBSCR18	DnaJ heat shock protein family (Hsp40) member C30	protein-coding
10_siC_WDR5_peak_4355	chr14	64108329	64109290	+	746	NA	promoter-TSS (NM_001008726)	promoter-TSS (NM_001008726)	-220	NM_080666	112840	Hs.655666	NM_080666	ENSG00000140006	WDR89	C14orf150|MSTP050	WD repeat domain 89	protein-coding
10_siC_WDR5_peak_7500	chr19	39832506	39833193	+	745	NA	promoter-TSS (NM_001303614)	promoter-TSS (NM_001303614)	-250	NM_018028	55095	Hs.612332	NM_018028	ENSG00000179134	SAMD4B	SMGB|Smaug2	sterile alpha motif domain containing 4B	protein-coding
10_siC_WDR5_peak_5529	chr16	31128792	31129318	+	745	NA	promoter-TSS (NM_182958)	promoter-TSS (NM_182958)	70	NM_182958	84148	Hs.533803	NM_032188	ENSG00000103510	KAT8	MOF|MYST1|ZC2HC8|hMOF	lysine acetyltransferase 8	protein-coding
10_siC_WDR5_peak_12377	chr6	34855448	34856271	+	745	NA	promoter-TSS (NM_005643)	promoter-TSS (NM_005643)	-11	NM_001270488	6882	Hs.112444	NM_005643	ENSG00000064995	TAF11	MGC:15243|PRO2134|TAF2I|TAFII28	TATA-box binding protein associated factor 11	protein-coding
10_siC_WDR5_peak_13928	chr8	9413212	9414051	+	745	NA	exon (NM_003747, exon 1 of 27)	exon (NM_003747, exon 1 of 27)	209	NM_003747	8658	Hs.370267	NM_003747	ENSG00000173273	TNKS	ARTD5|PARP-5a|PARP5A|PARPL|TIN1|TINF1|TNKS1|pART5	tankyrase	protein-coding
10_siC_WDR5_peak_12368	chr6	33783693	33784021	+	745	NA	Intergenic	LTR33A|LTR|ERVL	-12077	NM_002418	4295	Hs.2813	NM_002418	ENSG00000096395	MLN	-	motilin	protein-coding
10_siC_WDR5_peak_5783	chr17	899825	900600	+	744	NA	promoter-TSS (NM_013337)	promoter-TSS (NM_013337)	-157	NM_013337	29928	Hs.745034	NM_013337	ENSG00000177370	TIMM22	TEX4|TIM22	translocase of inner mitochondrial membrane 22	protein-coding
10_siC_WDR5_peak_14470	chr8	144623381	144624069	+	744	NA	promoter-TSS (NM_015117)	promoter-TSS (NM_015117)	-108	NM_015117	23144	Hs.521915	NM_015117	ENSG00000014164	ZC3H3	ZC3HDC3	zinc finger CCCH-type containing 3	protein-coding
10_siC_WDR5_peak_13503	chr7	90830861	90831458	+	744	NA	intron (NM_001287136, intron 13 of 13)	intron (NM_001287136, intron 13 of 13)	-62589	NM_003505	8321	Hs.94234	NM_003505	ENSG00000157240	FZD1	-	frizzled class receptor 1	protein-coding
10_siC_WDR5_peak_3174	chr12	46554259	46554752	+	744	NA	Intergenic	Intergenic	105794	NM_001278389	81539	Hs.533770	NM_030674	ENSG00000111371	SLC38A1	ATA1|NAT2|SAT1|SNAT1	solute carrier family 38 member 1	protein-coding
10_siC_WDR5_peak_10563	chr3	157776561	157776940	+	744	NA	Intergenic	Intergenic	47202	NM_001163678	6474	Hs.55967	NM_003030	ENSG00000168779	SHOX2	OG12|OG12X|SHOT	short stature homeobox 2	protein-coding
10_siC_WDR5_peak_15301	chrX	73163911	73164336	+	744	NA	promoter-TSS (NR_024582)	promoter-TSS (NR_024582)	-36	NR_024582	554203	Hs.648316	NR_024582	ENSG00000225470	JPX	DCBALD06|ENOX|LINC00183|NCRNA00183	JPX transcript, XIST activator	ncRNA
10_siC_WDR5_peak_5792	chr17	1587730	1588413	+	744	NA	promoter-TSS (NM_006445)	promoter-TSS (NM_006445)	90	NM_006445	10594	Hs.181368	NM_006445	ENSG00000174231	PRPF8	HPRP8|PRP8|PRPC8|RP13|SNRNP220	pre-mRNA processing factor 8	protein-coding
10_siC_WDR5_peak_1813	chr10	71210983	71211409	+	744	NA	promoter-TSS (NM_001351263)	promoter-TSS (NM_001351263)	-25	NM_012339	23555	Hs.499941	NM_012339	ENSG00000099282	TSPAN15	2700063A19Rik|NET-7|NET7|TM4SF15	tetraspanin 15	protein-coding
10_siC_WDR5_peak_3684	chr12	118814078	118814668	+	743	NA	promoter-TSS (NM_022491)	promoter-TSS (NM_022491)	13	NM_022491	64426	Hs.416630	NM_022491	ENSG00000111707	SUDS3	SAP45|SDS3	SDS3 homolog, SIN3A corepressor complex component	protein-coding
10_siC_WDR5_peak_2928	chr12	498055	499074	+	743	NA	promoter-TSS (NM_001130147)	promoter-TSS (NM_001130147)	48	NM_001130147	84318	Hs.631656	NM_032358	ENSG00000120647	CCDC77	-	coiled-coil domain containing 77	protein-coding
10_siC_WDR5_peak_4870	chr15	64673340	64673932	+	743	NA	promoter-TSS (NM_001029989)	promoter-TSS (NM_001029989)	4	NM_014736	9768	Hs.81892	NM_014736	ENSG00000166803	PCLAF	KIAA0101|L5|NS5ATP9|OEATC|OEATC-1|OEATC1|PAF|PAF15|p15(PAF)|p15/PAF|p15PAF	PCNA clamp associated factor	protein-coding
10_siC_WDR5_peak_12892	chr6	149866830	149867676	+	743	NA	promoter-TSS (NM_139126)	promoter-TSS (NM_139126)	-74	NM_139126	85313	Hs.744238	NM_139126	ENSG00000131013	PPIL4	HDCME13P	peptidylprolyl isomerase like 4	protein-coding
10_siC_WDR5_peak_4886	chr15	65809344	65810221	+	742	NA	promoter-TSS (NR_135486)	promoter-TSS (NR_135486)	-170	NM_197960	54878	Hs.458609	NM_017743	ENSG00000074603	DPP8	DP8|DPRP-1|DPRP1|MST097|MSTP097|MSTP135|MSTP141	dipeptidyl peptidase 8	protein-coding
10_siC_WDR5_peak_3752	chr12	124117762	124118600	+	742	NA	promoter-TSS (NM_001271868)	promoter-TSS (NM_001271868)	52	NM_001414	1967	Hs.741273	NM_001414	ENSG00000111361	EIF2B1	EIF2B|EIF2BA	eukaryotic translation initiation factor 2B subunit alpha	protein-coding
10_siC_WDR5_peak_15236	chrX	48595577	48596271	+	742	NA	Intergenic	CpG	-24227	NM_001080489	392465	Hs.437539	NM_001080489	ENSG00000171433	GLOD5	-	glyoxalase domain containing 5	protein-coding
10_siC_WDR5_peak_3682	chr12	118683786	118684102	+	742	NA	intron (NM_001346488, intron 4 of 21)	intron (NM_001346488, intron 4 of 21)	-55604	NM_001346497	51347	Hs.644420	NM_016281	ENSG00000135090	TAOK3	DPK|JIK|MAP3K18|hKFC-A	TAO kinase 3	protein-coding
10_siC_WDR5_peak_884	chr1	155178314	155179391	+	742	NA	exon (NM_198883, exon 1 of 7)	exon (NM_198883, exon 1 of 7)	362	NM_198883	4580	Hs.490874	NM_002455	ENSG00000173171	MTX1	MTX|MTXN	metaxin 1	protein-coding
10_siC_WDR5_peak_10991	chr4	80085762	80086647	+	741	NA	intron (NR_038342, intron 3 of 5)	intron (NR_038342, intron 3 of 5)	161011	NM_032693	84779	Hs.676048	NM_032693	ENSG00000156269	NAA11	ARD1B|ARD2|hARD2	N(alpha)-acetyltransferase 11, NatA catalytic subunit	protein-coding
10_siC_WDR5_peak_15	chr1	1334661	1335141	+	741	NA	promoter-TSS (NR_015434)	promoter-TSS (NR_015434)	-9	NR_015434	148413	Hs.741357	NR_015434	ENSG00000224870	MRPL20-AS1	-	MRPL20 antisense RNA 1	ncRNA
10_siC_WDR5_peak_3393	chr12	68769420	68770248	+	741	NA	Intergenic	Intergenic	-43640	NM_001205028	56890	Hs.655702	NM_017440	ENSG00000111554	MDM1	-	Mdm1 nuclear protein	protein-coding
10_siC_WDR5_peak_4292	chr14	53019262	53019738	+	740	NA	promoter-TSS (NM_020784)	promoter-TSS (NM_020784)	-54	NR_148417	283554	Hs.416214	NM_001099652	ENSG00000180998	GPR137C	TM7SF1L2	G protein-coupled receptor 137C	protein-coding
10_siC_WDR5_peak_2706	chr11	82867607	82868410	+	740	NA	promoter-TSS (NM_001346415)	promoter-TSS (NM_001346415)	-165	NM_001346415	51585	Hs.128959	NM_015885	ENSG00000165494	PCF11	-	PCF11 cleavage and polyadenylation factor subunit	protein-coding
10_siC_WDR5_peak_5002	chr15	75165169	75165767	+	740	NA	intron (NM_005697, intron 1 of 8)	CpG	238	NM_005697	10066	Hs.458917	NM_005697	ENSG00000140497	SCAMP2	-	secretory carrier membrane protein 2	protein-coding
10_siC_WDR5_peak_4999	chr15	74988005	74988943	+	739	NA	promoter-TSS (NM_025083)	promoter-TSS (NM_025083)	-109	NM_001351379	80153	Hs.96852	NM_025083	ENSG00000179151	EDC3	LSM16|MRT50|YJDC|YJEFN2|hYjeF_N2-15q23	enhancer of mRNA decapping 3	protein-coding
10_siC_WDR5_peak_4940	chr15	70477583	70478065	+	739	NA	Intergenic	Intergenic	-87568	NM_005078	7090	Hs.287362	NM_005078	ENSG00000140332	TLE3	ESG|ESG3|GRG3|HsT18976	TLE family member 3, transcriptional corepressor	protein-coding
10_siC_WDR5_peak_8930	chr2	219134495	219135356	+	739	NA	promoter-TSS (NM_001077399)	promoter-TSS (NM_001077399)	-65	NM_001302545	14	Hs.83347	NM_001087	ENSG00000127837	AAMP	-	angio associated migratory cell protein	protein-coding
10_siC_WDR5_peak_13747	chr7	135242469	135243471	+	739	NA	intron (NM_015135, intron 1 of 42)	intron (NM_015135, intron 1 of 42)	305	NM_001329434	23165	Hs.743250	NM_015135	ENSG00000155561	NUP205	C7orf14|NPHS13	nucleoporin 205	protein-coding
10_siC_WDR5_peak_6717	chr17	79669908	79670899	+	738	NA	promoter-TSS (NM_002949)	promoter-TSS (NM_002949)	6	NM_002949	6182	Hs.109059	NM_002949	ENSG00000262814	MRPL12	5c5-2|L12mt|MRP-L31/34|MRPL7|MRPL7/L12|RPML12	mitochondrial ribosomal protein L12	protein-coding
10_siC_WDR5_peak_11372	chr5	21459355	21459902	+	738	NA	promoter-TSS (NR_027026)	promoter-TSS (NR_027026)	39	NR_027028	728411	Hs.88181	NM_207331	ENSG00000183666	GUSBP1	-	GUSB pseudogene 1	pseudo
10_siC_WDR5_peak_2967	chr12	6193395	6193803	+	738	NA	intron (NM_000552, intron 6 of 51)	intron (NM_000552, intron 6 of 51)	40242	NM_000552	7450	Hs.440848	NM_000552	ENSG00000110799	VWF	F8VWF|VWD	von Willebrand factor	protein-coding
10_siC_WDR5_peak_13343	chr7	64023097	64023722	+	738	NA	promoter-TSS (NM_178558)	promoter-TSS (NM_178558)	40	NM_178558	340252	Hs.520886	NM_178558	ENSG00000173041	ZNF680	-	zinc finger protein 680	protein-coding
10_siC_WDR5_peak_14453	chr8	143209973	143210575	+	738	NA	Intergenic	Intergenic	-47426	NR_039682	100616268		NR_039682	ENSG00000265247	MIR4472-1	-	microRNA 4472-1	ncRNA
10_siC_WDR5_peak_3423	chr12	76231510	76231803	+	738	NA	Intergenic	Intergenic	193900	NM_007350	22822	Hs.602085	NM_007350	ENSG00000139289	PHLDA1	DT1P1B11|PHRIP|TDAG51	pleckstrin homology like domain family A member 1	protein-coding
10_siC_WDR5_peak_7483	chr19	38714716	38715111	+	738	NA	promoter-TSS (NM_001135155)	promoter-TSS (NM_001135155)	-23	NM_001135155	8193	Hs.631576	NM_004647	ENSG00000011332	DPF1	BAF45b|NEUD4|neuro-d4	double PHD fingers 1	protein-coding
10_siC_WDR5_peak_284	chr1	46908035	46908470	+	737	NA	intron (NR_045483, intron 7 of 8)	MIRb|SINE|MIR	7124	NR_121680	101929651	Hs.638707	NR_121680	ENSG00000224863	LINC01398	-	long intergenic non-protein coding RNA 1398	ncRNA
10_siC_WDR5_peak_5755	chr16	89138651	89138961	+	737	NA	Intergenic	Intergenic	-21411	NM_001243279	197322	Hs.461727	NM_174917	ENSG00000176715	ACSF3	-	acyl-CoA synthetase family member 3	protein-coding
10_siC_WDR5_peak_4719	chr15	43212237	43213329	+	737	NA	5' UTR (NM_173500, exon 1 of 15)	5' UTR (NM_173500, exon 1 of 15)	193	NM_173500	146057	Hs.646511	NM_173500	ENSG00000128881	TTBK2	SCA11|TTBK	tau tubulin kinase 2	protein-coding
10_siC_WDR5_peak_2092	chr10	118469524	118470077	+	737	NA	intron (NM_001330164, intron 2 of 12)	intron (NM_001330164, intron 2 of 12)	32277	NM_025015	259217	Hs.648448	NM_025015	ENSG00000165868	HSPA12A	-	heat shock protein family A (Hsp70) member 12A	protein-coding
10_siC_WDR5_peak_2317	chr11	19563054	19563851	+	736	NA	intron (NM_001111018, intron 1 of 37)	intron (NM_001111018, intron 1 of 37)	-17827	NR_033989	399876	Hs.132600	NR_033989	ENSG00000254622	NAV2-AS4	-	NAV2 antisense RNA 4	ncRNA
10_siC_WDR5_peak_5967	chr17	19290479	19291188	+	736	NA	promoter-TSS (NM_001198695)	promoter-TSS (NM_001198695)	-330	NM_002404	4239	Hs.296049	NM_002404	ENSG00000166482	MFAP4	-	microfibril associated protein 4	protein-coding
10_siC_WDR5_peak_9581	chr21	44527065	44527943	+	736	NA	intron (NM_001025204, intron 1 of 8)	CpG	176	NM_001320648	102724594	Hs.365116	NM_001320646	ENSG00000275895	U2AF1L5	-	U2 small nuclear RNA auxiliary factor 1 like 5	protein-coding
10_siC_WDR5_peak_13256	chr7	39605662	39606368	+	735	NA	promoter-TSS (NM_001282446)	promoter-TSS (NM_001282446)	12	NM_020192	57002	Hs.72168	NM_020192	ENSG00000241127	YAE1	C7orf36|CIAB2|GK003|YAE1D1	YAE1 maturation factor of ABCE1	protein-coding
10_siC_WDR5_peak_5795	chr17	1627722	1628324	+	735	NA	promoter-TSS (NM_001163809)	promoter-TSS (NM_001163809)	25	NM_001163811	124997	Hs.234572	NM_152348	ENSG00000167716	WDR81	CAMRQ2|HYC3|PPP1R166|SORF-2	WD repeat domain 81	protein-coding
10_siC_WDR5_peak_10669	chr3	186500793	186502240	+	735	NA	intron (NM_001967, intron 1 of 10)	CpG	150	NM_001967	1974	Hs.518475	NM_001967	ENSG00000156976	EIF4A2	BM-010|DDX2B|EIF4A|EIF4F|eIF-4A-II|eIF4A-II	eukaryotic translation initiation factor 4A2	protein-coding
10_siC_WDR5_peak_11662	chr5	112196656	112197369	+	735	NA	promoter-TSS (NM_003135)	promoter-TSS (NM_003135)	28	NM_001204199	6728	Hs.637001	NM_003135	ENSG00000153037	SRP19	-	signal recognition particle 19	protein-coding
10_siC_WDR5_peak_12097	chr6	5003768	5004549	+	734	NA	exon (NM_001286132, exon 1 of 7)	exon (NM_001286132, exon 1 of 7)	108	NR_126017	100129461	Hs.131700	NR_126015	ENSG00000272142	LYRM4-AS1	-	LYRM4 antisense RNA 1	ncRNA
10_siC_WDR5_peak_5473	chr16	29624027	29625416	+	734	NA	non-coding (NR_135317, exon 1 of 12)	non-coding (NR_135317, exon 1 of 12)	317	NR_135317	440354	Hs.552700	NR_002473		SMG1P2	-	SMG1 pseudogene 2	pseudo
10_siC_WDR5_peak_14874	chr9	107644459	107645242	+	734	NA	intron (NM_005502, intron 5 of 49)	intron (NM_005502, intron 5 of 49)	45586	NM_005502	19	Hs.659274	NM_005502	ENSG00000165029	ABCA1	ABC-1|ABC1|CERP|HDLDT1|TGD	ATP binding cassette subfamily A member 1	protein-coding
10_siC_WDR5_peak_9810	chr22	41214975	41215590	+	734	NA	promoter-TSS (NM_006358)	promoter-TSS (NM_006358)	68	NM_006358	10478	Hs.474938	NM_006358	ENSG00000100372	SLC25A17	PMP34	solute carrier family 25 member 17	protein-coding
10_siC_WDR5_peak_14537	chr9	6015314	6016172	+	734	NA	promoter-TSS (NM_001243202)	promoter-TSS (NM_001243202)	-119	NM_001243203	26953	Hs.167496	NM_012416	ENSG00000137040	RANBP6	-	RAN binding protein 6	protein-coding
10_siC_WDR5_peak_11428	chr5	43514911	43515475	+	734	NA	promoter-TSS (NM_198566)	promoter-TSS (NM_198566)	57	NM_198566	375444	Hs.661641	NM_198566	ENSG00000172244	C5orf34	-	chromosome 5 open reading frame 34	protein-coding
10_siC_WDR5_peak_5293	chr16	3053871	3054301	+	734	NA	Intergenic	CpG	5130	NR_110947	101929613	Hs.741644	NR_110947		LOC101929613	LA16c-380H5.3	uncharacterized LOC101929613	ncRNA
10_siC_WDR5_peak_7721	chr19	52956631	52957434	+	733	NA	intron (NM_001099694, intron 1 of 5)	CpG	226	NM_001099694	147660	Hs.157287	NM_152472	ENSG00000258405	ZNF578	-	zinc finger protein 578	protein-coding
10_siC_WDR5_peak_5149	chr15	90436942	90437591	+	733	NA	promoter-TSS (NM_005829)	promoter-TSS (NM_005829)	-40	NR_037582	10239	Hs.632161	NM_005829	ENSG00000157823	AP3S2	AP3S3|sigma3b	adaptor related protein complex 3 subunit sigma 2	protein-coding
10_siC_WDR5_peak_2593	chr11	66725523	66726488	+	733	NA	promoter-TSS (NM_000920)	promoter-TSS (NM_000920)	-151	NM_001040716	5091	Hs.89890	NM_000920	ENSG00000173599	PC	PCB	pyruvate carboxylase	protein-coding
10_siC_WDR5_peak_1426	chr1	230222869	230223458	+	733	NA	intron (NM_004481, intron 1 of 15)	intron (NM_004481, intron 1 of 15)	20178	NM_004481	2590	Hs.743964	NM_004481	ENSG00000143641	GALNT2	GalNAc-T2	polypeptide N-acetylgalactosaminyltransferase 2	protein-coding
10_siC_WDR5_peak_6005	chr17	27181585	27182286	+	733	NA	promoter-TSS (NM_001317986)	promoter-TSS (NM_001317986)	-99	NM_001317986	26284	Hs.3426	NM_005702	ENSG00000132591	ERAL1	CEGA|ERA|ERA-W|ERAL1A|ERAL1B|H-ERA|HERA-A|HERA-B|PRLTS6	Era like 12S mitochondrial rRNA chaperone 1	protein-coding
10_siC_WDR5_peak_14617	chr9	34048373	34049710	+	733	NA	promoter-TSS (NM_018449)	promoter-TSS (NM_018449)	-94	NM_018449	55833	Hs.493739	NM_018449	ENSG00000137073	UBAP2	UBAP-2	ubiquitin associated protein 2	protein-coding
10_siC_WDR5_peak_565	chr1	91300409	91300782	+	733	NA	intron (NR_147930, intron 1 of 1)	intron (NR_147930, intron 1 of 1)	1123	NR_147932	105378853	Hs.546492	NR_135038	ENSG00000233593	LINC02609	-	long intergenic non-protein coding RNA 2609	ncRNA
10_siC_WDR5_peak_7867	chr2	3652635	3653419	+	733	NA	promoter-TSS (NM_001255986)	promoter-TSS (NM_001255986)	-615	NM_001255988	78989	Hs.32603	NM_024027	ENSG00000118004	COLEC11	3MC2|CL-K1-I|CL-K1-II|CL-K1-IIa|CL-K1-IIb|CLK1	collectin subfamily member 11	protein-coding
10_siC_WDR5_peak_5895	chr17	10600442	10601241	+	732	NA	promoter-TSS (NM_004589)	promoter-TSS (NM_004589)	9	NM_004589	6341	Hs.14511	NM_004589	ENSG00000133028	SCO1	SCOD1	SCO cytochrome c oxidase assembly protein 1	protein-coding
10_siC_WDR5_peak_1525	chr1	245133045	245134783	+	732	NA	intron (NR_026587, intron 1 of 5)	CpG	257	NR_111907	101928068	Hs.134857	NR_111907		LOC101928068	-	uncharacterized LOC101928068	ncRNA
10_siC_WDR5_peak_6878	chr18	42322659	42323241	+	732	NA	intron (NM_001130110, intron 2 of 3)	CT-rich|Low_complexity|Low_complexity	62097	NM_015559	26040	Hs.435458	NM_015559	ENSG00000152217	SETBP1	MRD29|SEB	SET binding protein 1	protein-coding
10_siC_WDR5_peak_5054	chr15	78963856	78964640	+	731	NA	Intergenic	Intergenic	-30696	NM_001256567	1143	Hs.624178	NM_000750	ENSG00000117971	CHRNB4	-	cholinergic receptor nicotinic beta 4 subunit	protein-coding
10_siC_WDR5_peak_13456	chr7	75368088	75368788	+	731	NA	promoter-TSS (NM_001243198)	promoter-TSS (NM_001243198)	-179	NM_001243198	3092	Hs.329266	NM_005338	ENSG00000127946	HIP1	HIP-I|ILWEQ|SHON|SHONbeta|SHONgamma	huntingtin interacting protein 1	protein-coding
10_siC_WDR5_peak_12205	chr6	23180719	23181325	+	730	NA	Intergenic	Intergenic	-462869	NR_134614	105374972	Hs.484889	NR_134613		LOC105374972	-	uncharacterized LOC105374972	ncRNA
10_siC_WDR5_peak_9524	chr21	34143585	34144616	+	730	NA	promoter-TSS (NM_013329)	promoter-TSS (NM_013329)	-34	NM_013329	94104	Hs.644004	NM_013329	ENSG00000159086	PAXBP1	BM020|C21orf66|FSAP105|GCFC|GCFC1	PAX3 and PAX7 binding protein 1	protein-coding
10_siC_WDR5_peak_1322	chr1	218458292	218458946	+	729	NA	promoter-TSS (NM_016052)	promoter-TSS (NM_016052)	-16	NM_016052	51018	Hs.660109	NM_016052	ENSG00000067533	RRP15	CGI-115|KIAA0507	ribosomal RNA processing 15 homolog	protein-coding
10_siC_WDR5_peak_1049	chr1	173793234	173794873	+	729	NA	promoter-TSS (NM_001127181)	promoter-TSS (NM_001127181)	242	NM_001365213	55157	Hs.647707	NM_018122	ENSG00000117593	DARS2	ASPRS|LBSL|MT-ASPRS|mtAspRS	aspartyl-tRNA synthetase 2, mitochondrial	protein-coding
10_siC_WDR5_peak_1276	chr1	212208141	212209457	+	729	NA	promoter-TSS (NM_015434)	promoter-TSS (NM_015434)	-96	NM_001286230	51514	Hs.656473	NM_016448	ENSG00000143476	DTL	CDT2|DCAF2|L2DTL|RAMP	denticleless E3 ubiquitin protein ligase homolog	protein-coding
10_siC_WDR5_peak_1152	chr1	198500128	198500456	+	728	NA	intron (NM_133262, intron 2 of 3)	intron (NM_133262, intron 2 of 3)	9783	NM_133326	127124	Hs.127743	NM_133262	ENSG00000151418	ATP6V1G3	ATP6G3|Vma10	ATPase H+ transporting V1 subunit G3	protein-coding
10_siC_WDR5_peak_620	chr1	97439163	97439536	+	727	NA	Intergenic	LTR81|LTR|Gypsy	-122130	NR_046590	100873932	Hs.682651	NR_046590	ENSG00000232878	DPYD-AS1	-	DPYD antisense RNA 1	ncRNA
10_siC_WDR5_peak_4722	chr15	43621915	43623129	+	727	NA	promoter-TSS (NM_001324364)	promoter-TSS (NM_001324364)	-27	NM_001324364	161823	Hs.533913	NM_001012969	ENSG00000168803	ADAL	-	adenosine deaminase like	protein-coding
10_siC_WDR5_peak_14694	chr9	69065033	69065794	+	727	NA	promoter-TSS (NR_034006).2	promoter-TSS (NR_034006).2	-77	NR_034006	100132352	Hs.231861	NR_034006		FRG1HP	-	FSHD region gene 1 family member H, pseudogene	pseudo
10_siC_WDR5_peak_12444	chr6	42185363	42185794	+	727	NA	promoter-TSS (NM_018141)	promoter-TSS (NM_018141)	21	NM_018141	55173	Hs.380887	NM_018141	ENSG00000048544	MRPS10	MRP-S10|PNAS-122	mitochondrial ribosomal protein S10	protein-coding
10_siC_WDR5_peak_8016	chr2	27994269	27995088	+	727	NA	promoter-TSS (NM_004891)	promoter-TSS (NM_004891)	92	NM_004891	9553	Hs.515879	NM_004891	ENSG00000243147	MRPL33	C2orf1|L33mt|MRP-L33|RPL33L	mitochondrial ribosomal protein L33	protein-coding
10_siC_WDR5_peak_6261	chr17	46048101	46048951	+	727	NA	promoter-TSS (NM_176096)	promoter-TSS (NM_176096)	47	NM_001278198	80279	Hs.20157	NM_025197	ENSG00000108465	CDK5RAP3	C53|HSF-27|IC53|LZAP|MST016|OK/SW-cl.114|PP1553	CDK5 regulatory subunit associated protein 3	protein-coding
10_siC_WDR5_peak_3233	chr12	51803487	51803961	+	727	NA	intron (NM_001258401, intron 1 of 24)	LTR38|LTR|ERV1	-14891	NM_001258402	9498	Hs.4749	NM_004858	ENSG00000050438	SLC4A8	NBC3|NDCBE	solute carrier family 4 member 8	protein-coding
10_siC_WDR5_peak_5978	chr17	20946366	20947123	+	726	NA	promoter-TSS (NM_015276)	promoter-TSS (NM_015276)	-420	NM_015276	23326	Hs.462492	NM_015276	ENSG00000124422	USP22	USP3L	ubiquitin specific peptidase 22	protein-coding
10_siC_WDR5_peak_2933	chr12	860378	861968	+	726	NA	promoter-TSS (NM_001184985)	promoter-TSS (NM_001184985)	-572	NM_018979	65125	Hs.744906	NM_014823	ENSG00000060237	WNK1	HSAN2|HSN2|KDP|PPP1R167|PRKWNK1|PSK|p65	WNK lysine deficient protein kinase 1	protein-coding
10_siC_WDR5_peak_13325	chr7	54826487	54827261	+	726	NA	promoter-TSS (NR_110040)	promoter-TSS (NR_110040)	30	NM_014302	23480	Hs.488282	NM_014302	ENSG00000132432	SEC61G	SSS1	SEC61 translocon gamma subunit	protein-coding
10_siC_WDR5_peak_12338	chr6	32143633	32144112	+	726	NA	promoter-TSS (NM_006411).3	promoter-TSS (NM_006411).3	-11	NM_006411	10554	Hs.409230	NM_006411	ENSG00000204310	AGPAT1	1-AGPAT1|G15|LPAAT-alpha|LPAATA	1-acylglycerol-3-phosphate O-acyltransferase 1	protein-coding
10_siC_WDR5_peak_10171	chr3	50606604	50607075	+	726	NA	promoter-TSS (NM_016173)	promoter-TSS (NM_016173)	-114	NM_016173	51409	Hs.517987	NM_016173	ENSG00000114735	HEMK1	HEMK|MTQ1	HemK methyltransferase family member 1	protein-coding
10_siC_WDR5_peak_13566	chr7	99678713	99679657	+	726	NA	intron (NM_001371211, intron 1 of 5)	CpG	161	NM_001318137	7551	Hs.435302	NM_017715	ENSG00000166526	ZNF3	A8-51|HF.12|KOX25|PP838|Zfp113	zinc finger protein 3	protein-coding
10_siC_WDR5_peak_4594	chr14	104028593	104029572	+	726	NA	promoter-TSS (NM_001302652)	promoter-TSS (NM_001302652)	69	NM_001015048	9529	Hs.5443	NM_004873	ENSG00000166170	BAG5	BAG-5	BCL2 associated athanogene 5	protein-coding
10_siC_WDR5_peak_12247	chr6	26596885	26597460	+	725	NA	promoter-TSS (NM_013375)	promoter-TSS (NM_013375)	-9	NM_013375	29777	Hs.254406	NM_013375	ENSG00000146109	ABT1	Esf2|hABT1	activator of basal transcription 1	protein-coding
10_siC_WDR5_peak_14620	chr9	34329024	34329950	+	725	NA	promoter-TSS (NM_147172)	promoter-TSS (NM_147172)	-17	NM_001244390	318	Hs.493767	NM_001161	ENSG00000164978	NUDT2	APAH1	nudix hydrolase 2	protein-coding
10_siC_WDR5_peak_4174	chr14	21979226	21979785	+	725	NA	promoter-TSS (NM_019852)	promoter-TSS (NM_019852)	-23	NM_019852	56339	Hs.168799	NM_019852	ENSG00000165819	METTL3	IME4|M6A|MT-A70|Spo8|hMETTL3	methyltransferase like 3	protein-coding
10_siC_WDR5_peak_711	chr1	115258952	115259747	+	725	NA	promoter-TSS (NM_002524)	promoter-TSS (NM_002524)	43	NM_002524	4893	Hs.486502	NM_002524	ENSG00000213281	NRAS	ALPS4|CMNS|N-ras|NCMS|NRAS1|NS6	NRAS proto-oncogene, GTPase	protein-coding
10_siC_WDR5_peak_1373	chr1	226111595	226112577	+	725	NA	promoter-TSS (NM_001271681)	promoter-TSS (NM_001271681)	-46	NM_001271681	29920	Hs.654718	NM_013328	ENSG00000143811	PYCR2	HLD10|P5CR2	pyrroline-5-carboxylate reductase 2	protein-coding
10_siC_WDR5_peak_4417	chr14	74416617	74417363	+	724	NA	promoter-TSS (NM_182476)	promoter-TSS (NM_182476)	-15	NM_182476	51004	Hs.131555	NM_182476	ENSG00000119723	COQ6	CGI-10|CGI10|COQ10D6	coenzyme Q6, monooxygenase	protein-coding
10_siC_WDR5_peak_3544	chr12	104350667	104351599	+	724	NA	promoter-TSS (NM_001135570)	promoter-TSS (NM_001135570)	-140	NM_001135570	728568	Hs.42547	NM_001135570	ENSG00000204954	C12orf73	-	chromosome 12 open reading frame 73	protein-coding
10_siC_WDR5_peak_9501	chr21	28326923	28327434	+	724	NA	TTS (NR_039916)	TTS (NR_039916)	898	NR_039916	100616243		NR_039916	ENSG00000266133	MIR4759	-	microRNA 4759	ncRNA
10_siC_WDR5_peak_15080	chr9	135819732	135820526	+	724	NA	promoter-TSS (NM_000368)	promoter-TSS (NM_000368)	-109	NM_000368	7248	Hs.370854	NM_000368	ENSG00000165699	TSC1	LAM|TSC	TSC complex subunit 1	protein-coding
10_siC_WDR5_peak_5020	chr15	76050665	76051241	+	724	NA	Intergenic	Intergenic	3703	NR_036198	100423035		NR_036198	ENSG00000284385	MIR4313	-	microRNA 4313	ncRNA
10_siC_WDR5_peak_10330	chr3	101292548	101293736	+	724	NA	intron (NR_135231, intron 1 of 2)	CpG	118	NM_020357	57092	Hs.732633	NM_020357	ENSG00000081154	PCNP	-	PEST proteolytic signal containing nuclear protein	protein-coding
10_siC_WDR5_peak_4251	chr14	39644089	39644984	+	724	NA	promoter-TSS (NM_002687)	promoter-TSS (NM_002687)	78	NM_002687	5411	Hs.409965	NM_002687	ENSG00000100941	PNN	DRS|DRSP|SDK3|memA	pinin, desmosome associated protein	protein-coding
10_siC_WDR5_peak_1612	chr10	17243162	17243909	+	724	NA	intron (NM_004412, intron 1 of 10)	CpG	136	NM_001321006	1787	Hs.351665	NM_004412	ENSG00000107614	TRDMT1	DMNT2|DNMT2|MHSAIIP|PUMET|RNMT1	tRNA aspartic acid methyltransferase 1	protein-coding
10_siC_WDR5_peak_379	chr1	56839815	56840619	+	724	NA	Intergenic	Intergenic	-40418	NR_147163	105378744	Hs.183974	NR_147163	ENSG00000223956	LINC01767	-	long intergenic non-protein coding RNA 1767	ncRNA
10_siC_WDR5_peak_2567	chr11	65600936	65601535	+	724	NA	promoter-TSS (NM_152760)	promoter-TSS (NM_152760)	-199	NM_152760	254122	Hs.591950	NM_152760	ENSG00000172803	SNX32	SNX6B	sorting nexin 32	protein-coding
10_siC_WDR5_peak_5215	chr15	101874233	101874841	+	722	NA	promoter-TSS (NR_132373)	promoter-TSS (NR_132373)	-105	NR_132373	105371027		NR_132373	ENSG00000259764	PCSK6-AS1	-	PCSK6 antisense RNA 1	ncRNA
10_siC_WDR5_peak_8895	chr2	209421605	209422274	+	722	NA	intron (NR_136588, intron 1 of 5)	LTR8A|LTR|ERV1	14572	NR_136588	101927960	Hs.159960	NR_136588		LOC101927960	-	uncharacterized LOC101927960	ncRNA
10_siC_WDR5_peak_11713	chr5	125936445	125937261	+	722	NA	intron (NM_032177, intron 1 of 4)	CpG	214	NM_032177	51808	Hs.555731	NM_032177	ENSG00000164902	PHAX	RNUXA	phosphorylated adaptor for RNA export	protein-coding
10_siC_WDR5_peak_12967	chr6	160210181	160211767	+	722	NA	promoter-TSS (NM_030752)	promoter-TSS (NM_030752)	75	NR_134865	29074	Hs.416998	NM_014161	ENSG00000112110	MRPL18	HSPC071|L18mt|MRP-L18	mitochondrial ribosomal protein L18	protein-coding
10_siC_WDR5_peak_13178	chr7	28045133	28045534	+	722	NA	intron (NM_175061, intron 1 of 4)	intron (NM_175061, intron 1 of 4)	-174743	NR_034097	100128081	Hs.434307	NR_034097		JAZF1-AS1	-	JAZF1 antisense RNA 1	ncRNA
10_siC_WDR5_peak_9261	chr20	34638669	34639124	+	721	NA	promoter-TSS (NR_027451)	promoter-TSS (NR_027451)	-14	NR_027451	647979	Hs.743232	NR_027451	ENSG00000260032	NORAD	LINC00657	non-coding RNA activated by DNA damage	ncRNA
10_siC_WDR5_peak_15223	chrX	47415070	47416058	+	721	NA	Intergenic	Intergenic	-4935	NM_001256197	369	Hs.446641	NM_001654	ENSG00000078061	ARAF	A-RAF|ARAF1|PKS2|RAFA1	A-Raf proto-oncogene, serine/threonine kinase	protein-coding
10_siC_WDR5_peak_4374	chr14	68161993	68163142	+	720	NA	promoter-TSS (NM_001252650)	promoter-TSS (NM_001252650)	-86	NM_016026	51109	Hs.719925	NM_016026	ENSG00000072042	RDH11	ARSDR1|CGI82|HCBP12|MDT1|PSDR1|RALR1|RDJCSS|SCALD|SDR7C1	retinol dehydrogenase 11	protein-coding
10_siC_WDR5_peak_1947	chr10	96122453	96123010	+	720	NA	promoter-TSS (NM_022451)	promoter-TSS (NM_022451)	-35	NM_022451	64318	Hs.74899	NM_022451	ENSG00000173145	NOC3L	AD24|C10orf117|FAD24	NOC3 like DNA replication regulator	protein-coding
10_siC_WDR5_peak_3414	chr12	72233159	72233925	+	719	NA	promoter-TSS (NM_001146213)	promoter-TSS (NM_001146213)	3	NM_001146213	64786	Hs.284630	NM_022771	ENSG00000121749	TBC1D15	RAB7-GAP	TBC1 domain family member 15	protein-coding
10_siC_WDR5_peak_12666	chr6	100016035	100016791	+	719	NA	5' UTR (NM_001363537, exon 1 of 13)	5' UTR (NM_001363537, exon 1 of 13)	123	NM_005190	892	Hs.430646	NM_005190	ENSG00000112237	CCNC	CycC|SRB11|hSRB11	cyclin C	protein-coding
10_siC_WDR5_peak_5432	chr16	25122601	25123370	+	718	NA	promoter-TSS (NM_001032391)	promoter-TSS (NM_001032391)	-78	NM_016309	51451	Hs.337730	NM_016309	ENSG00000205629	LCMT1	CGI-68|LCMT|PPMT1	leucine carboxyl methyltransferase 1	protein-coding
10_siC_WDR5_peak_231	chr1	38477919	38478653	+	718	NA	promoter-TSS (NM_016037)	promoter-TSS (NM_016037)	-120	NM_016037	51118	Hs.472038	NM_016037	ENSG00000183520	UTP11	CGI-94|CGI94|UTP11L	UTP11 small subunit processome component	protein-coding
10_siC_WDR5_peak_5287	chr16	2827199	2827806	+	718	NA	promoter-TSS (NM_207013)	promoter-TSS (NM_207013)	-221	NM_007108	6923	Hs.172772	NM_007108	ENSG00000103363	ELOB	SIII|TCEB2	elongin B	protein-coding
10_siC_WDR5_peak_9739	chr22	31364625	31365746	+	717	NA	promoter-TSS (NR_152868)	promoter-TSS (NR_152868)	-12	NR_152871	55000	Hs.554829	NR_002323	ENSG00000253352	TUG1	LINC00080|NCRNA00080|TI-227H	taurine up-regulated 1	ncRNA
10_siC_WDR5_peak_15239	chrX	48814585	48815856	+	717	NA	promoter-TSS (NM_001136158)	promoter-TSS (NM_001136158)	-327	NM_001136158	55593	Hs.496098	NM_017602	ENSG00000068308	OTUD5	DUBA	OTU deubiquitinase 5	protein-coding
10_siC_WDR5_peak_5707	chr16	77224486	77225267	+	717	NA	promoter-TSS (NM_014940)	promoter-TSS (NM_014940)	-211	NM_001286639	22879	Hs.513743	NM_014940	ENSG00000103111	MON1B	HSRG1|SAND2|SRG1	MON1 homolog B, secretory trafficking associated	protein-coding
10_siC_WDR5_peak_8691	chr2	172543773	172544436	+	717	NA	promoter-TSS (NM_001271785)	promoter-TSS (NM_001271785)	125	NM_001271790	1781	Hs.546250	NM_001378	ENSG00000077380	DYNC1I2	DIC74|DNCI2|IC2	dynein cytoplasmic 1 intermediate chain 2	protein-coding
10_siC_WDR5_peak_515	chr1	78147980	78149497	+	715	NA	promoter-TSS (NM_015534)	promoter-TSS (NM_015534)	374	NM_001308237	26009	Hs.480506	NM_015534	ENSG00000036549	ZZZ3	ATAC1	zinc finger ZZ-type containing 3	protein-coding
10_siC_WDR5_peak_7425	chr19	34919138	34919905	+	715	NA	intron (NM_005499, intron 1 of 16)	CpG	235	NM_005499	10054	Hs.631580	NM_005499	ENSG00000126261	UBA2	ARX|HRIHFB2115|SAE2	ubiquitin like modifier activating enzyme 2	protein-coding
10_siC_WDR5_peak_7458	chr19	37263492	37264371	+	715	NA	promoter-TSS (NM_001294306)	promoter-TSS (NM_001294306)	-89	NM_001294306	728485	Hs.157101	NM_001294306		LOC728485	-	uncharacterized LOC728485	protein-coding
10_siC_WDR5_peak_7791	chr19	58071041	58071425	+	714	NA	promoter-TSS (NM_001277093)	promoter-TSS (NM_001277093)	-2	NM_001277090	162972	Hs.180257	NM_153231	ENSG00000251369	ZNF550	-	zinc finger protein 550	protein-coding
10_siC_WDR5_peak_10192	chr3	52739629	52740508	+	714	NA	promoter-TSS (NM_014041)	promoter-TSS (NM_014041)	31	NM_001278280	55830	Hs.297304	NM_018446	ENSG00000016864	GLT8D1	AD-017|MSTP139	glycosyltransferase 8 domain containing 1	protein-coding
10_siC_WDR5_peak_13002	chr6	170238553	170238952	+	714	NA	Intergenic	Intergenic	-39831	NR_026781	401288	Hs.556095	NM_207502	ENSG00000229214	LINC00242	C6orf122|NCRNA00242|dJ266L20.5	long intergenic non-protein coding RNA 242	ncRNA
10_siC_WDR5_peak_11821	chr5	141262905	141263709	+	714	NA	Intergenic	Intergenic	-5332	NM_002587	5097	Hs.79769	NM_002587	ENSG00000156453	PCDH1	PC42|PCDH42	protocadherin 1	protein-coding
10_siC_WDR5_peak_7065	chr19	2151053	2151876	+	714	NA	5' UTR (NM_001261826, exon 1 of 32)	5' UTR (NM_001261826, exon 1 of 32)	101	NM_003938	8943	Hs.512815	NM_003938	ENSG00000065000	AP3D1	ADTD|HPS10|hBLVR	adaptor related protein complex 3 subunit delta 1	protein-coding
10_siC_WDR5_peak_6045	chr17	30668962	30669458	+	714	NA	promoter-TSS (NM_022344)	promoter-TSS (NM_022344)	-18	NM_022344	64149	Hs.655257	NM_022344	ENSG00000108666	C17orf75	NJMU-R1|SRI2	chromosome 17 open reading frame 75	protein-coding
10_siC_WDR5_peak_5504	chr16	30545998	30547591	+	714	NA	promoter-TSS (NM_001305019)	promoter-TSS (NM_001305019)	-503	NM_001305018	65988	Hs.592032	NM_023931	ENSG00000169955	ZNF747	-	zinc finger protein 747	protein-coding
10_siC_WDR5_peak_11482	chr5	66826360	66826696	+	712	NA	Intergenic	Intergenic	116089	NR_147169	105379006		NR_147169	ENSG00000249736	LINC02242	-	long intergenic non-protein coding RNA 2242	ncRNA
10_siC_WDR5_peak_6233	chr17	43983630	43984000	+	711	NA	intron (NM_016835, intron 1 of 13).2	intron (NM_016835, intron 1 of 13).2	10666	NR_024560	100130148	Hs.669307	NR_024560	ENSG00000279685	MAPT-IT1	-	MAPT intronic transcript 1	ncRNA
10_siC_WDR5_peak_844	chr1	153935759	153936406	+	710	NA	promoter-TSS (NM_001271961)	promoter-TSS (NM_001271961)	35	NM_001271961	27173	Hs.7854	NM_014437	ENSG00000143570	SLC39A1	ZIP1|ZIRTL	solute carrier family 39 member 1	protein-coding
10_siC_WDR5_peak_9157	chr20	18118281	18119061	+	710	NA	exon (NM_001164811, exon 1 of 2)	exon (NM_001164811, exon 1 of 2)	164	NM_001164811	100303755	Hs.488051	NM_001164811	ENSG00000232838	PET117	CSRP2BP	PET117 cytochrome c oxidase chaperone	protein-coding
10_siC_WDR5_peak_2577	chr11	65819387	65820242	+	710	NA	promoter-TSS (NR_145738)	promoter-TSS (NR_145738)	-21	NM_006842	10992	Hs.406423	NM_006842	ENSG00000087365	SF3B2	Cus1|SAP145|SF3B145|SF3b1|SF3b150	splicing factor 3b subunit 2	protein-coding
10_siC_WDR5_peak_3256	chr12	54019707	54020368	+	709	NA	promoter-TSS (NM_001366556)	promoter-TSS (NM_001366556)	129	NM_001366561	11016	Hs.12286	NM_006856	ENSG00000170653	ATF7	ATFA	activating transcription factor 7	protein-coding
10_siC_WDR5_peak_13008	chr6	170893311	170894027	+	708	NA	promoter-TSS (NM_002598)	promoter-TSS (NM_002598)	56	NM_144781	5134	Hs.367900	NM_002598	ENSG00000071994	PDCD2	RP8|ZMYND7	programmed cell death 2	protein-coding
10_siC_WDR5_peak_8035	chr2	29928953	29929557	+	707	NA	intron (NM_004304, intron 2 of 28)	intron (NM_004304, intron 2 of 28)	215197	NM_004304	238	Hs.654469	NM_004304	ENSG00000171094	ALK	CD246|NBLST3	ALK receptor tyrosine kinase	protein-coding
10_siC_WDR5_peak_11543	chr5	73351308	73351755	+	707	NA	Intergenic	Intergenic	242160	NM_001244364	64283	Hs.482521	NM_001080479	ENSG00000214944	ARHGEF28	RGNEF|RIP2|p190RHOGEF	Rho guanine nucleotide exchange factor 28	protein-coding
10_siC_WDR5_peak_14834	chr9	99180380	99181814	+	707	NA	promoter-TSS (NM_153695)	promoter-TSS (NM_153695)	-445	NM_153695	195828	Hs.494557	NM_153695	ENSG00000165244	ZNF367	AFF29|CDC14B|ZFF29	zinc finger protein 367	protein-coding
10_siC_WDR5_peak_12064	chr6	692675	693306	+	707	NA	intron (NR_073064, intron 1 of 29)	CpG	149	NM_018303	55770	Hs.484412	NM_018303	ENSG00000112685	EXOC2	SEC5|SEC5L1|Sec5p	exocyst complex component 2	protein-coding
10_siC_WDR5_peak_9595	chr21	46359573	46360179	+	707	NA	promoter-TSS (NR_027128)	promoter-TSS (NR_027128)	-36	NM_001316983	85395	Hs.410830	NM_058190	ENSG00000160256	FAM207A	C21orf70|PRED56	family with sequence similarity 207 member A	protein-coding
10_siC_WDR5_peak_7949	chr2	20549850	20551132	+	707	NA	5' UTR (NM_001282752, exon 1 of 20)	5' UTR (NM_001282752, exon 1 of 20)	114	NM_001352930	23369	Hs.467824	NM_015317	ENSG00000055917	PUM2	PUMH2|PUML2	pumilio RNA binding family member 2	protein-coding
10_siC_WDR5_peak_4031	chr13	60737793	60738516	+	707	NA	promoter-TSS (NM_001258367)	promoter-TSS (NM_001258367)	-35	NM_001258369	81624	Hs.283127	NM_030932	ENSG00000139734	DIAPH3	AN|AUNA1|DIA2|DRF3|NSDAN|diap3|mDia2	diaphanous related formin 3	protein-coding
10_siC_WDR5_peak_7915	chr2	10829710	10830376	+	707	NA	promoter-TSS (NM_001261392)	promoter-TSS (NM_001261392)	58	NM_024894	79954	Hs.222494	NM_024894	ENSG00000115761	NOL10	PQBP5	nucleolar protein 10	protein-coding
10_siC_WDR5_peak_7679	chr19	50144956	50145837	+	706	NA	promoter-TSS (NM_021228)	promoter-TSS (NM_021228)	-70	NM_021228	58506	Hs.103521	NM_021228	ENSG00000126461	SCAF1	SRA1	SR-related CTD associated factor 1	protein-coding
10_siC_WDR5_peak_9688	chr22	24316420	24316969	+	706	NA	promoter-TSS (NM_001084392)	promoter-TSS (NM_001084392)	-14	NM_001084392	1652	Hs.656723	NM_001355	ENSG00000099977	DDT	D-DT|DDCT|MIF-2|MIF2	D-dopachrome tautomerase	protein-coding
10_siC_WDR5_peak_10252	chr3	66271214	66271729	+	706	NA	promoter-TSS (NM_001350991)	promoter-TSS (NM_001350991)	43	NM_001350992	115286	Hs.379386	NM_173471	ENSG00000144741	SLC25A26	COXPD28|SAMC	solute carrier family 25 member 26	protein-coding
10_siC_WDR5_peak_8977	chr2	227663585	227664904	+	706	NA	promoter-TSS (NM_001349069)	promoter-TSS (NM_001349069)	-631	NM_001349069	84236	Hs.471514	NM_032276	ENSG00000144468	RHBDD1	RHBDL4|RRP4	rhomboid domain containing 1	protein-coding
10_siC_WDR5_peak_6187	chr17	42115993	42116445	+	705	NA	intron (NM_001369485, intron 3 of 5)	intron (NM_001369485, intron 3 of 5)	-15700	NM_001304813	84336	Hs.514211	NM_032376	ENSG00000091947	TMEM101	-	transmembrane protein 101	protein-coding
10_siC_WDR5_peak_7754	chr19	55987411	55988756	+	705	NA	promoter-TSS (NM_033113)	promoter-TSS (NM_033113)	99	NM_033113	89887	Hs.525209	NM_033113	ENSG00000197483	ZNF628	ZEC|Zfp628	zinc finger protein 628	protein-coding
10_siC_WDR5_peak_14010	chr8	25316368	25316983	+	705	NA	promoter-TSS (NM_017634)	promoter-TSS (NM_017634)	-74	NM_152562	157313	Hs.33366	NM_152562	ENSG00000184661	CDCA2	PPP1R81|Repo-Man	cell division cycle associated 2	protein-coding
10_siC_WDR5_peak_8341	chr2	74699539	74700077	+	705	NA	promoter-TSS (NM_053050)	promoter-TSS (NM_053050)	-1	NM_053050	116540	Hs.534527	NM_053050	ENSG00000204822	MRPL53	L53MT	mitochondrial ribosomal protein L53	protein-coding
10_siC_WDR5_peak_5214	chr15	101834896	101835829	+	705	NA	promoter-TSS (NR_135506)	promoter-TSS (NR_135506)	91	NM_003090	6627	Hs.528763	NM_003090	ENSG00000131876	SNRPA1	Lea1|U2A'	small nuclear ribonucleoprotein polypeptide A'	protein-coding
10_siC_WDR5_peak_12318	chr6	31515094	31515604	+	705	NA	promoter-TSS (NM_130463)	promoter-TSS (NM_130463)	-36	NM_005007	4795	Hs.2764	NM_005007	ENSG00000204498	NFKBIL1	IKBL|NFKBIL	NFKB inhibitor like 1	protein-coding
10_siC_WDR5_peak_3071	chr12	26110977	26111513	+	704	NA	promoter-TSS (NR_038227)	promoter-TSS (NR_038227)	-370	NM_007211	11228	Hs.696433	NM_007211	ENSG00000123094	RASSF8	C12orf2|HOJ1	Ras association domain family member 8	protein-coding
10_siC_WDR5_peak_11099	chr4	119606321	119606927	+	704	NA	promoter-TSS (NM_020961)	promoter-TSS (NM_020961)	77	NM_020961	57721	Hs.596872	NM_020961	ENSG00000145388	METTL14	hMETTL14	methyltransferase like 14	protein-coding
10_siC_WDR5_peak_12333	chr6	31939548	31940434	+	704	NA	promoter-TSS (NM_005510).4	promoter-TSS (NM_005510).4	-76	NM_005510	1797	Hs.153299	NM_005510	ENSG00000204348	DXO	DOM3L|DOM3Z|NG6|RAI1	decapping exoribonuclease	protein-coding
10_siC_WDR5_peak_6528	chr17	66453576	66454087	+	704	NA	promoter-TSS (NR_135471)	promoter-TSS (NR_135471)	-166	NR_135470	55062	Hs.463964	NM_017983	ENSG00000070540	WIPI1	ATG18|ATG18A|WIPI49	WD repeat domain, phosphoinositide interacting 1	protein-coding
10_siC_WDR5_peak_4331	chr14	58893590	58894553	+	704	NA	promoter-TSS (NM_001244190)	promoter-TSS (NM_001244190)	-32	NM_001244191	9786	Hs.232532	NM_014749	ENSG00000100578	KIAA0586	JBTS23|SRTD14|Talpid3	KIAA0586	protein-coding
10_siC_WDR5_peak_7757	chr19	56096955	56097624	+	704	NA	Intergenic	Intergenic	-5075	NM_152600	163033	Hs.112529	NM_152600	ENSG00000218891	ZNF579	-	zinc finger protein 579	protein-coding
10_siC_WDR5_peak_4684	chr15	40330962	40331648	+	703	NA	promoter-TSS (NM_003134)	promoter-TSS (NM_003134)	77	NM_003134	6727	Hs.533732	NM_003134	ENSG00000140319	SRP14	ALURBP	signal recognition particle 14	protein-coding
10_siC_WDR5_peak_9805	chr22	40742022	40742889	+	703	NA	promoter-TSS (NM_001317923)	promoter-TSS (NM_001317923)	-49	NM_001363840	158	Hs.75527	NM_000026	ENSG00000239900	ADSL	AMPS|ASASE|ASL	adenylosuccinate lyase	protein-coding
10_siC_WDR5_peak_7989	chr2	26568306	26569688	+	702	NA	promoter-TSS (NR_137633)	promoter-TSS (NR_137633)	-14	NM_033505	85465	Hs.189073	NM_033505	ENSG00000138018	SELENOI	EPT1|SELI|SEPI	selenoprotein I	protein-coding
10_siC_WDR5_peak_7980	chr2	25194156	25195255	+	702	NA	promoter-TSS (NR_034113)	promoter-TSS (NR_034113)	119	NM_016544	51277	Hs.434993	NM_016544	ENSG00000115137	DNAJC27	RBJ|RabJS	DnaJ heat shock protein family (Hsp40) member C27	protein-coding
10_siC_WDR5_peak_10332	chr3	101395752	101396197	+	701	NA	promoter-TSS (NM_014415)	promoter-TSS (NM_014415)	2	NM_014415	27107	Hs.655286	NM_014415	ENSG00000066422	ZBTB11	MRT69|ZNF-U69274|ZNF913	zinc finger and BTB domain containing 11	protein-coding
10_siC_WDR5_peak_11406	chr5	37379172	37379660	+	701	NA	promoter-TSS (NM_001345998)	promoter-TSS (NM_001345998)	-4	NM_018034	55100	Hs.213690	NM_018034	ENSG00000082068	WDR70	-	WD repeat domain 70	protein-coding
10_siC_WDR5_peak_12394	chr6	36842285	36842887	+	701	NA	promoter-TSS (NM_016059)	promoter-TSS (NM_016059)	-7	NM_016059	51645	Hs.27693	NM_016059	ENSG00000137168	PPIL1	CGI-124|CYPL1|PPIase|hCyPX	peptidylprolyl isomerase like 1	protein-coding
10_siC_WDR5_peak_13691	chr7	128378803	128379874	+	701	NA	promoter-TSS (NM_001199671)	promoter-TSS (NM_001199671)	-75	NM_001219	813	Hs.7753	NM_001219	ENSG00000128595	CALU	-	calumenin	protein-coding
10_siC_WDR5_peak_14464	chr8	144328964	144329394	+	701	NA	promoter-TSS (NM_173832)	promoter-TSS (NM_173832)	70	NM_173832	286128	Hs.668016	NM_173832	ENSG00000181638	ZFP41	ZNF753|zfp-41	ZFP41 zinc finger protein	protein-coding
10_siC_WDR5_peak_4724	chr15	43784923	43785623	+	701	NA	promoter-TSS (NM_001141979)	promoter-TSS (NM_001141979)	81	NM_001355001	7158	Hs.440968	NM_005657	ENSG00000067369	TP53BP1	53BP1|TDRD30|p202|p53BP1	tumor protein p53 binding protein 1	protein-coding
10_siC_WDR5_peak_7531	chr19	41283808	41284355	+	700	NA	promoter-TSS (NR_037791)	promoter-TSS (NR_037791)	-43	NR_037791	100529264	Hs.631539	NR_037791		RAB4B-EGLN2	EGLN2|EIT-6|EIT6|HIF-PH1|HPH-1|HPH-3|PHD1|RERT-lncRNA	RAB4B-EGLN2 readthrough (NMD candidate)	ncRNA
[truncated: 13,765 more rows]

## Sheet: siWDR5_WDR5_p-7
PeakID (cmd=annotatePeaks.pl p-7narrowpeak/11_siW_WDR5_macspeaks.txt hg19)	Chr	Start	End	Strand	Peak Score	Focus Ratio/Region Size	Annotation	Detailed Annotation	Distance to TSS	Nearest PromoterID	Entrez ID	Nearest Unigene	Nearest Refseq	Nearest Ensembl	Gene Name	Gene Alias	Gene Description	Gene Type
[truncated: 7,404 more rows]
