# Supplementary material for: MYCN drives oncogenesis by cooperating with the histone methyltransferase G9a and the WDR5 adaptor to orchestrate global gene transcription
Source: PLoS Biol. 2024 Mar 28;22(3):e3002240. doi: 10.1371/journal.pbio.3002240 (PMC11003700; doi:10.1371/journal.pbio.3002240)
Supplement: S10 Table — (XLSX) [file pbio.3002240.s017.xlsx]

## Sheet: greatExportAll
Table S10. GREAT GO analysis of WDR5 and MYCN overlapped ChIP-seq peaks with >2.5-fold decrease of WDR5 signal intensity after the silencing of WDR5.
# Ontology	ID	Desc	BinomRank	BinomP	BinomBonfP	BinomFdrQ	RegionFoldEnrich	ExpRegions	ObsRegions	GenomeFrac	SetCov	HyperRank	HyperP	HyperBonfP	HyperFdrQ	GeneFoldEnrich	ExpGenes	ObsGenes	TotalGenes	GeneSetCov	TermCov	Regions	Genes
GO Biological Process	GO:0000184	nuclear-transcribed mRNA catabolic process, nonsense-mediated decay	1	6.63096e-46	8.55593e-42	8.55593e-42	17.8484	2.85739	51	0.00571478	0.102	2	1.90037e-41	2.45205e-37	1.22603e-37	12.102	4.13154	50	119	0.0776397	0.420168	unnamed,unnamed,unnamed,unnamed,unnamed,unnamed,unnamed,unnamed,unnamed,unnamed,unnamed,unnamed,unnamed,unnamed,unnamed,unnamed,unnamed,unnamed,unnamed,unnamed,unnamed,unnamed,unnamed,unnamed,unnamed,unnamed,unnamed,unnamed,unnamed,unnamed,unnamed,unnamed,unnamed,unnamed,unnamed,unnamed,unnamed,unnamed,unnamed,unnamed,unnamed,unnamed,unnamed,unnamed,unnamed,unnamed,unnamed,unnamed,unnamed,unnamed…	CTIF,EIF4G1,PPP2R2A,RNPS1,RPL10A,RPL11,RPL12,RPL13,RPL15,RPL17,RPL18,RPL19,RPL23,RPL23A,RPL24,RPL26,RPL29,RPL3,RPL31,RPL32,RPL34,RPL35,RPL35A,RPL36,RPL36A,RPL37,RPL37A,RPL39,RPL41,RPL5,RPL6,RPL7,RPL7A,RPL8,RPL9,RPS10,RPS14,RPS15,RPS15A,RPS17,RPS17L,RPS2,RPS24,RPS3,RPS3A,RPS4X,RPS4Y1,RPS6,RPS7,RPS8
GO Biological Process	GO:0006614	SRP-dependent cotranslational protein targeting to membrane	2	1.45123e-45	1.87252e-41	9.36259e-42	21.0394	2.23391	47	0.00446781	0.094	1	2.68278e-42	3.46159e-38	3.46159e-38	14.2465	3.22885	46	93	0.0714286	0.494624	unnamed,unnamed,unnamed,unnamed,unnamed,unnamed,unnamed,unnamed,unnamed,unnamed,unnamed,unnamed,unnamed,unnamed,unnamed,unnamed,unnamed,unnamed,unnamed,unnamed,unnamed,unnamed,unnamed,unnamed,unnamed,unnamed,unnamed,unnamed,unnamed,unnamed,unnamed,unnamed,unnamed,unnamed,unnamed,unnamed,unnamed,unnamed,unnamed,unnamed,unnamed,unnamed,unnamed,unnamed,unnamed,unnamed,unnamed	RPL10A,RPL11,RPL12,RPL13,RPL15,RPL17,RPL18,RPL19,RPL23,RPL23A,RPL24,RPL26,RPL29,RPL3,RPL31,RPL32,RPL34,RPL35,RPL35A,RPL36,RPL36A,RPL37,RPL37A,RPL39,RPL41,RPL5,RPL6,RPL7,RPL7A,RPL8,RPL9,RPS10,RPS14,RPS15,RPS15A,RPS17,RPS17L,RPS2,RPS24,RPS3,RPS3A,RPS4X,RPS4Y1,RPS6,RPS7,RPS8
GO Biological Process	GO:0006613	cotranslational protein targeting to membrane	3	2.55808e-44	3.30069e-40	1.10023e-40	19.7382	2.38117	47	0.00476235	0.094	4	1.07937e-40	1.39271e-36	3.48177e-37	13.3831	3.43717	46	99	0.0714286	0.464647	unnamed,unnamed,unnamed,unnamed,unnamed,unnamed,unnamed,unnamed,unnamed,unnamed,unnamed,unnamed,unnamed,unnamed,unnamed,unnamed,unnamed,unnamed,unnamed,unnamed,unnamed,unnamed,unnamed,unnamed,unnamed,unnamed,unnamed,unnamed,unnamed,unnamed,unnamed,unnamed,unnamed,unnamed,unnamed,unnamed,unnamed,unnamed,unnamed,unnamed,unnamed,unnamed,unnamed,unnamed,unnamed,unnamed,unnamed	RPL10A,RPL11,RPL12,RPL13,RPL15,RPL17,RPL18,RPL19,RPL23,RPL23A,RPL24,RPL26,RPL29,RPL3,RPL31,RPL32,RPL34,RPL35,RPL35A,RPL36,RPL36A,RPL37,RPL37A,RPL39,RPL41,RPL5,RPL6,RPL7,RPL7A,RPL8,RPL9,RPS10,RPS14,RPS15,RPS15A,RPS17,RPS17L,RPS2,RPS24,RPS3,RPS3A,RPS4X,RPS4Y1,RPS6,RPS7,RPS8
GO Biological Process	GO:0019083	viral transcription	4	1.74942e-43	2.25728e-39	5.6432e-40	16.567	3.01804	50	0.00603609	0.1	3	3.17157e-41	4.09227e-37	1.36409e-37	12.3802	3.95795	49	114	0.076087	0.429825	unnamed,unnamed,unnamed,unnamed,unnamed,unnamed,unnamed,unnamed,unnamed,unnamed,unnamed,unnamed,unnamed,unnamed,unnamed,unnamed,unnamed,unnamed,unnamed,unnamed,unnamed,unnamed,unnamed,unnamed,unnamed,unnamed,unnamed,unnamed,unnamed,unnamed,unnamed,unnamed,unnamed,unnamed,unnamed,unnamed,unnamed,unnamed,unnamed,unnamed,unnamed,unnamed,unnamed,unnamed,unnamed,unnamed,unnamed,unnamed,unnamed,unnamed	NUP155,NUP205,POM121C,RPL10A,RPL11,RPL12,RPL13,RPL15,RPL17,RPL18,RPL19,RPL23,RPL23A,RPL24,RPL26,RPL29,RPL3,RPL31,RPL32,RPL34,RPL35,RPL35A,RPL36,RPL36A,RPL37,RPL37A,RPL39,RPL41,RPL5,RPL6,RPL7,RPL7A,RPL8,RPL9,RPS10,RPS14,RPS15,RPS15A,RPS17,RPS17L,RPS2,RPS24,RPS3,RPS3A,RPS4X,RPS4Y1,RPS6,RPS7,RPS8
GO Biological Process	GO:0045047	protein targeting to ER	5	2.50681e-43	3.23454e-39	6.46907e-40	18.7583	2.50556	47	0.00501111	0.094	5	6.06991e-40	7.832e-36	1.5664e-36	12.9895	3.54132	46	102	0.0714286	0.45098	unnamed,unnamed,unnamed,unnamed,unnamed,unnamed,unnamed,unnamed,unnamed,unnamed,unnamed,unnamed,unnamed,unnamed,unnamed,unnamed,unnamed,unnamed,unnamed,unnamed,unnamed,unnamed,unnamed,unnamed,unnamed,unnamed,unnamed,unnamed,unnamed,unnamed,unnamed,unnamed,unnamed,unnamed,unnamed,unnamed,unnamed,unnamed,unnamed,unnamed,unnamed,unnamed,unnamed,unnamed,unnamed,unnamed,unnamed	RPL10A,RPL11,RPL12,RPL13,RPL15,RPL17,RPL18,RPL19,RPL23,RPL23A,RPL24,RPL26,RPL29,RPL3,RPL31,RPL32,RPL34,RPL35,RPL35A,RPL36,RPL36A,RPL37,RPL37A,RPL39,RPL41,RPL5,RPL6,RPL7,RPL7A,RPL8,RPL9,RPS10,RPS14,RPS15,RPS15A,RPS17,RPS17L,RPS2,RPS24,RPS3,RPS3A,RPS4X,RPS4Y1,RPS6,RPS7,RPS8
GO Biological Process	GO:0019080	viral gene expression	6	3.06157e-43	3.95034e-39	6.58391e-40	15.7196	3.24436	51	0.00648871	0.102	6	1.48829e-39	1.92034e-35	3.20057e-36	11.2511	4.44401	50	128	0.0776397	0.390625	unnamed,unnamed,unnamed,unnamed,unnamed,unnamed,unnamed,unnamed,unnamed,unnamed,unnamed,unnamed,unnamed,unnamed,unnamed,unnamed,unnamed,unnamed,unnamed,unnamed,unnamed,unnamed,unnamed,unnamed,unnamed,unnamed,unnamed,unnamed,unnamed,unnamed,unnamed,unnamed,unnamed,unnamed,unnamed,unnamed,unnamed,unnamed,unnamed,unnamed,unnamed,unnamed,unnamed,unnamed,unnamed,unnamed,unnamed,unnamed,unnamed,unnamed…	EIF3D,NUP155,NUP205,POM121C,RPL10A,RPL11,RPL12,RPL13,RPL15,RPL17,RPL18,RPL19,RPL23,RPL23A,RPL24,RPL26,RPL29,RPL3,RPL31,RPL32,RPL34,RPL35,RPL35A,RPL36,RPL36A,RPL37,RPL37A,RPL39,RPL41,RPL5,RPL6,RPL7,RPL7A,RPL8,RPL9,RPS10,RPS14,RPS15,RPS15A,RPS17,RPS17L,RPS2,RPS24,RPS3,RPS3A,RPS4X,RPS4Y1,RPS6,RPS7,RPS8
GO Biological Process	GO:0072599	establishment of protein localization to endoplasmic reticulum	7	8.17578e-41	1.05492e-36	1.50703e-37	16.4763	2.85258	47	0.00570515	0.094	7	5.43603e-39	7.01411e-35	1.00202e-35	12.4993	3.6802	46	106	0.0714286	0.433962	unnamed,unnamed,unnamed,unnamed,unnamed,unnamed,unnamed,unnamed,unnamed,unnamed,unnamed,unnamed,unnamed,unnamed,unnamed,unnamed,unnamed,unnamed,unnamed,unnamed,unnamed,unnamed,unnamed,unnamed,unnamed,unnamed,unnamed,unnamed,unnamed,unnamed,unnamed,unnamed,unnamed,unnamed,unnamed,unnamed,unnamed,unnamed,unnamed,unnamed,unnamed,unnamed,unnamed,unnamed,unnamed,unnamed,unnamed	RPL10A,RPL11,RPL12,RPL13,RPL15,RPL17,RPL18,RPL19,RPL23,RPL23A,RPL24,RPL26,RPL29,RPL3,RPL31,RPL32,RPL34,RPL35,RPL35A,RPL36,RPL36A,RPL37,RPL37A,RPL39,RPL41,RPL5,RPL6,RPL7,RPL7A,RPL8,RPL9,RPS10,RPS14,RPS15,RPS15A,RPS17,RPS17L,RPS2,RPS24,RPS3,RPS3A,RPS4X,RPS4Y1,RPS6,RPS7,RPS8
GO Biological Process	GO:0006413	translational initiation	8	4.73565e-39	6.11041e-35	7.63801e-36	12.8477	3.96959	51	0.00793918	0.102	9	1.33489e-36	1.72241e-32	1.91378e-33	10.001	4.99951	50	144	0.0776397	0.347222	unnamed,unnamed,unnamed,unnamed,unnamed,unnamed,unnamed,unnamed,unnamed,unnamed,unnamed,unnamed,unnamed,unnamed,unnamed,unnamed,unnamed,unnamed,unnamed,unnamed,unnamed,unnamed,unnamed,unnamed,unnamed,unnamed,unnamed,unnamed,unnamed,unnamed,unnamed,unnamed,unnamed,unnamed,unnamed,unnamed,unnamed,unnamed,unnamed,unnamed,unnamed,unnamed,unnamed,unnamed,unnamed,unnamed,unnamed,unnamed,unnamed,unnamed…	EIF3D,EIF4G1,EIF4G3,EIF4H,RPL10A,RPL11,RPL12,RPL13,RPL15,RPL17,RPL18,RPL19,RPL23,RPL23A,RPL24,RPL26,RPL29,RPL3,RPL31,RPL32,RPL34,RPL35,RPL35A,RPL36,RPL36A,RPL37,RPL37A,RPL39,RPL41,RPL5,RPL6,RPL7,RPL7A,RPL8,RPL9,RPS10,RPS14,RPS15,RPS15A,RPS17,RPS17L,RPS2,RPS24,RPS3,RPS3A,RPS4X,RPS4Y1,RPS6,RPS7,RPS8
GO Biological Process	GO:0044033	multi-organism metabolic process	9	5.3739e-39	6.93394e-35	7.70438e-36	12.363	4.20611	52	0.00841221	0.104	8	3.98919e-37	5.14725e-33	6.43406e-34	9.92529	5.13839	51	148	0.0791926	0.344595	unnamed,unnamed,unnamed,unnamed,unnamed,unnamed,unnamed,unnamed,unnamed,unnamed,unnamed,unnamed,unnamed,unnamed,unnamed,unnamed,unnamed,unnamed,unnamed,unnamed,unnamed,unnamed,unnamed,unnamed,unnamed,unnamed,unnamed,unnamed,unnamed,unnamed,unnamed,unnamed,unnamed,unnamed,unnamed,unnamed,unnamed,unnamed,unnamed,unnamed,unnamed,unnamed,unnamed,unnamed,unnamed,unnamed,unnamed,unnamed,unnamed,unnamed…	ATG16L2,EIF3D,NUP155,NUP205,POM121C,RPL10A,RPL11,RPL12,RPL13,RPL15,RPL17,RPL18,RPL19,RPL23,RPL23A,RPL24,RPL26,RPL29,RPL3,RPL31,RPL32,RPL34,RPL35,RPL35A,RPL36,RPL36A,RPL37,RPL37A,RPL39,RPL41,RPL5,RPL6,RPL7,RPL7A,RPL8,RPL9,RPS10,RPS14,RPS15,RPS15A,RPS17,RPS17L,RPS2,RPS24,RPS3,RPS3A,RPS4X,RPS4Y1,RPS6,RPS7,RPS8
GO Biological Process	GO:0070972	protein localization to endoplasmic reticulum	10	1.38709e-38	1.78976e-34	1.78976e-35	14.0826	3.40845	48	0.00681691	0.096	10	2.53299e-36	3.26831e-32	3.26831e-33	10.8299	4.33986	47	125	0.0729814	0.376	unnamed,unnamed,unnamed,unnamed,unnamed,unnamed,unnamed,unnamed,unnamed,unnamed,unnamed,unnamed,unnamed,unnamed,unnamed,unnamed,unnamed,unnamed,unnamed,unnamed,unnamed,unnamed,unnamed,unnamed,unnamed,unnamed,unnamed,unnamed,unnamed,unnamed,unnamed,unnamed,unnamed,unnamed,unnamed,unnamed,unnamed,unnamed,unnamed,unnamed,unnamed,unnamed,unnamed,unnamed,unnamed,unnamed,unnamed,unnamed	RPL10A,RPL11,RPL12,RPL13,RPL15,RPL17,RPL18,RPL19,RPL23,RPL23A,RPL24,RPL26,RPL29,RPL3,RPL31,RPL32,RPL34,RPL35,RPL35A,RPL36,RPL36A,RPL37,RPL37A,RPL39,RPL41,RPL5,RPL6,RPL7,RPL7A,RPL8,RPL9,RPS10,RPS14,RPS15,RPS15A,RPS17,RPS17L,RPS2,RPS24,RPS3,RPS3A,RPS4X,RPS4Y1,RPS6,RPS7,RPS8,UBAC2
GO Biological Process	GO:0006612	protein targeting to membrane	11	6.21513e-37	8.01938e-33	7.29034e-34	12.4543	3.93437	49	0.00786874	0.098	11	9.8161e-36	1.26657e-31	1.15143e-32	10.241	4.68705	48	135	0.0745342	0.355556	unnamed,unnamed,unnamed,unnamed,unnamed,unnamed,unnamed,unnamed,unnamed,unnamed,unnamed,unnamed,unnamed,unnamed,unnamed,unnamed,unnamed,unnamed,unnamed,unnamed,unnamed,unnamed,unnamed,unnamed,unnamed,unnamed,unnamed,unnamed,unnamed,unnamed,unnamed,unnamed,unnamed,unnamed,unnamed,unnamed,unnamed,unnamed,unnamed,unnamed,unnamed,unnamed,unnamed,unnamed,unnamed,unnamed,unnamed,unnamed,unnamed	EXOC4,NUP155,RPL10A,RPL11,RPL12,RPL13,RPL15,RPL17,RPL18,RPL19,RPL23,RPL23A,RPL24,RPL26,RPL29,RPL3,RPL31,RPL32,RPL34,RPL35,RPL35A,RPL36,RPL36A,RPL37,RPL37A,RPL39,RPL41,RPL5,RPL6,RPL7,RPL7A,RPL8,RPL9,RPS10,RPS14,RPS15,RPS15A,RPS17,RPS17L,RPS2,RPS24,RPS3,RPS3A,RPS4X,RPS4Y1,RPS6,RPS7,RPS8
GO Biological Process	GO:0000956	nuclear-transcribed mRNA catabolic process	12	4.23359e-33	5.4626e-29	4.55217e-30	9.29989	5.59147	52	0.0111829	0.104	13	2.65176e-30	3.42157e-26	2.63198e-27	7.45656	6.83961	51	197	0.0791926	0.258883	unnamed,unnamed,unnamed,unnamed,unnamed,unnamed,unnamed,unnamed,unnamed,unnamed,unnamed,unnamed,unnamed,unnamed,unnamed,unnamed,unnamed,unnamed,unnamed,unnamed,unnamed,unnamed,unnamed,unnamed,unnamed,unnamed,unnamed,unnamed,unnamed,unnamed,unnamed,unnamed,unnamed,unnamed,unnamed,unnamed,unnamed,unnamed,unnamed,unnamed,unnamed,unnamed,unnamed,unnamed,unnamed,unnamed,unnamed,unnamed,unnamed,unnamed…	CNOT6L,CTIF,EIF4G1,PPP2R2A,RNPS1,RPL10A,RPL11,RPL12,RPL13,RPL15,RPL17,RPL18,RPL19,RPL23,RPL23A,RPL24,RPL26,RPL29,RPL3,RPL31,RPL32,RPL34,RPL35,RPL35A,RPL36,RPL36A,RPL37,RPL37A,RPL39,RPL41,RPL5,RPL6,RPL7,RPL7A,RPL8,RPL9,RPS10,RPS14,RPS15,RPS15A,RPS17,RPS17L,RPS2,RPS24,RPS3,RPS3A,RPS4X,RPS4Y1,RPS6,RPS7,RPS8
GO Biological Process	GO:0006402	mRNA catabolic process	13	4.72859e-31	6.1013e-27	4.69331e-28	8.40807	6.18453	52	0.0123691	0.104	14	1.19881e-28	1.54682e-24	1.10487e-25	6.92897	7.3604	51	212	0.0791926	0.240566	unnamed,unnamed,unnamed,unnamed,unnamed,unnamed,unnamed,unnamed,unnamed,unnamed,unnamed,unnamed,unnamed,unnamed,unnamed,unnamed,unnamed,unnamed,unnamed,unnamed,unnamed,unnamed,unnamed,unnamed,unnamed,unnamed,unnamed,unnamed,unnamed,unnamed,unnamed,unnamed,unnamed,unnamed,unnamed,unnamed,unnamed,unnamed,unnamed,unnamed,unnamed,unnamed,unnamed,unnamed,unnamed,unnamed,unnamed,unnamed,unnamed,unnamed…	CNOT6L,CTIF,EIF4G1,PPP2R2A,RNPS1,RPL10A,RPL11,RPL12,RPL13,RPL15,RPL17,RPL18,RPL19,RPL23,RPL23A,RPL24,RPL26,RPL29,RPL3,RPL31,RPL32,RPL34,RPL35,RPL35A,RPL36,RPL36A,RPL37,RPL37A,RPL39,RPL41,RPL5,RPL6,RPL7,RPL7A,RPL8,RPL9,RPS10,RPS14,RPS15,RPS15A,RPS17,RPS17L,RPS2,RPS24,RPS3,RPS3A,RPS4X,RPS4Y1,RPS6,RPS7,RPS8
GO Biological Process	GO:0006364	rRNA processing	14	2.95252e-30	3.80963e-26	2.72117e-27	7.8612	6.74197	53	0.0134839	0.106	17	8.82951e-26	1.13927e-21	6.7016e-23	5.94343	8.74915	52	252	0.0807453	0.206349	unnamed,unnamed,unnamed,unnamed,unnamed,unnamed,unnamed,unnamed,unnamed,unnamed,unnamed,unnamed,unnamed,unnamed,unnamed,unnamed,unnamed,unnamed,unnamed,unnamed,unnamed,unnamed,unnamed,unnamed,unnamed,unnamed,unnamed,unnamed,unnamed,unnamed,unnamed,unnamed,unnamed,unnamed,unnamed,unnamed,unnamed,unnamed,unnamed,unnamed,unnamed,unnamed,unnamed,unnamed,unnamed,unnamed,unnamed,unnamed,unnamed,unnamed…	CSNK1E,DKC1,RIOK2,RPL10A,RPL11,RPL12,RPL13,RPL15,RPL17,RPL18,RPL19,RPL23,RPL23A,RPL24,RPL26,RPL29,RPL3,RPL31,RPL32,RPL34,RPL35,RPL35A,RPL36,RPL36A,RPL37,RPL37A,RPL39,RPL41,RPL5,RPL6,RPL7,RPL7A,RPL7L1,RPL8,RPL9,RPS10,RPS14,RPS15,RPS15A,RPS17,RPS17L,RPS2,RPS24,RPS3,RPS3A,RPS4X,RPS4Y1,RPS6,RPS7,RPS8,RRP1B,XRN2
GO Biological Process	GO:0090150	establishment of protein localization to membrane	15	6.46202e-30	8.33795e-26	5.55863e-27	7.52818	7.17305	54	0.0143461	0.108	12	3.40756e-31	4.39678e-27	3.66398e-28	7.2007	7.49927	54	216	0.0838509	0.25	unnamed,unnamed,unnamed,unnamed,unnamed,unnamed,unnamed,unnamed,unnamed,unnamed,unnamed,unnamed,unnamed,unnamed,unnamed,unnamed,unnamed,unnamed,unnamed,unnamed,unnamed,unnamed,unnamed,unnamed,unnamed,unnamed,unnamed,unnamed,unnamed,unnamed,unnamed,unnamed,unnamed,unnamed,unnamed,unnamed,unnamed,unnamed,unnamed,unnamed,unnamed,unnamed,unnamed,unnamed,unnamed,unnamed,unnamed,unnamed,unnamed,unnamed…	EXOC4,HSPA4,NUP155,PMAIP1,RAB34,RILPL1,RPL10A,RPL11,RPL12,RPL13,RPL15,RPL17,RPL18,RPL19,RPL23,RPL23A,RPL24,RPL26,RPL29,RPL3,RPL31,RPL32,RPL34,RPL35,RPL35A,RPL36,RPL36A,RPL37,RPL37A,RPL39,RPL41,RPL5,RPL6,RPL7,RPL7A,RPL8,RPL9,RPS10,RPS14,RPS15,RPS15A,RPS17,RPS17L,RPS2,RPS24,RPS3,RPS3A,RPS4X,RPS4Y1,RPS6,RPS7,RPS8,SPTBN1,WRB
GO Biological Process	GO:0016072	rRNA metabolic process	16	1.28625e-29	1.65965e-25	1.03728e-26	7.61847	6.95677	53	0.0139136	0.106	20	3.45512e-25	4.45814e-21	2.22907e-22	5.7828	8.99218	52	259	0.0807453	0.200772	unnamed,unnamed,unnamed,unnamed,unnamed,unnamed,unnamed,unnamed,unnamed,unnamed,unnamed,unnamed,unnamed,unnamed,unnamed,unnamed,unnamed,unnamed,unnamed,unnamed,unnamed,unnamed,unnamed,unnamed,unnamed,unnamed,unnamed,unnamed,unnamed,unnamed,unnamed,unnamed,unnamed,unnamed,unnamed,unnamed,unnamed,unnamed,unnamed,unnamed,unnamed,unnamed,unnamed,unnamed,unnamed,unnamed,unnamed,unnamed,unnamed,unnamed…	CSNK1E,DKC1,RIOK2,RPL10A,RPL11,RPL12,RPL13,RPL15,RPL17,RPL18,RPL19,RPL23,RPL23A,RPL24,RPL26,RPL29,RPL3,RPL31,RPL32,RPL34,RPL35,RPL35A,RPL36,RPL36A,RPL37,RPL37A,RPL39,RPL41,RPL5,RPL6,RPL7,RPL7A,RPL7L1,RPL8,RPL9,RPS10,RPS14,RPS15,RPS15A,RPS17,RPS17L,RPS2,RPS24,RPS3,RPS3A,RPS4X,RPS4Y1,RPS6,RPS7,RPS8,RRP1B,XRN2
GO Biological Process	GO:0006401	RNA catabolic process	17	1.19497e-28	1.54187e-24	9.06979e-26	7.2632	7.29706	53	0.0145941	0.106	16	7.55868e-27	9.75297e-23	6.0956e-24	6.24061	8.33253	52	240	0.0807453	0.216667	unnamed,unnamed,unnamed,unnamed,unnamed,unnamed,unnamed,unnamed,unnamed,unnamed,unnamed,unnamed,unnamed,unnamed,unnamed,unnamed,unnamed,unnamed,unnamed,unnamed,unnamed,unnamed,unnamed,unnamed,unnamed,unnamed,unnamed,unnamed,unnamed,unnamed,unnamed,unnamed,unnamed,unnamed,unnamed,unnamed,unnamed,unnamed,unnamed,unnamed,unnamed,unnamed,unnamed,unnamed,unnamed,unnamed,unnamed,unnamed,unnamed,unnamed…	CNOT6L,CTIF,EIF4G1,PPP2R2A,RNPS1,RPL10A,RPL11,RPL12,RPL13,RPL15,RPL17,RPL18,RPL19,RPL23,RPL23A,RPL24,RPL26,RPL29,RPL3,RPL31,RPL32,RPL34,RPL35,RPL35A,RPL36,RPL36A,RPL37,RPL37A,RPL39,RPL41,RPL5,RPL6,RPL7,RPL7A,RPL8,RPL9,RPS10,RPS14,RPS15,RPS15A,RPS17,RPS17L,RPS2,RPS24,RPS3,RPS3A,RPS4X,RPS4Y1,RPS6,RPS7,RPS8,XRN2
GO Biological Process	GO:0006412	translation	18	1.5314e-27	1.97596e-23	1.09776e-24	5.53322	11.3858	63	0.0227716	0.126	21	3.75936e-25	4.8507e-21	2.30986e-22	4.7876	12.9501	62	373	0.0962733	0.16622	unnamed,unnamed,unnamed,unnamed,unnamed,unnamed,unnamed,unnamed,unnamed,unnamed,unnamed,unnamed,unnamed,unnamed,unnamed,unnamed,unnamed,unnamed,unnamed,unnamed,unnamed,unnamed,unnamed,unnamed,unnamed,unnamed,unnamed,unnamed,unnamed,unnamed,unnamed,unnamed,unnamed,unnamed,unnamed,unnamed,unnamed,unnamed,unnamed,unnamed,unnamed,unnamed,unnamed,unnamed,unnamed,unnamed,unnamed,unnamed,unnamed,unnamed…	CDKAL1,EEF1G,EEF2,EIF3D,EIF4G1,EIF4G3,EIF4H,ENSG00000263809,GNB2L1,MRPL15,MRPL48,N6AMT1,RPL10A,RPL11,RPL12,RPL13,RPL15,RPL17,RPL17-C18orf32,RPL18,RPL19,RPL23,RPL23A,RPL24,RPL26,RPL29,RPL3,RPL31,RPL32,RPL34,RPL35,RPL35A,RPL36,RPL36A,RPL36A-HNRNPH2,RPL37,RPL37A,RPL39,RPL41,RPL5,RPL6,RPL7,RPL7A,RPL7L1,RPL8,RPL9,RPS10,RPS14,RPS15,RPS15A,RPS17,RPS17L,RPS2,RPS24,RPS3,RPS3A,RPS4X,RPS4Y1,RPS6,RPS7,RPS8,W…
GO Biological Process	GO:0043043	peptide biosynthetic process	19	1.44399e-26	1.86318e-22	9.8062e-24	5.11867	12.6986	65	0.0253972	0.13	19	1.98806e-25	2.5652e-21	1.3501e-22	4.69053	13.6445	64	393	0.0993789	0.16285	unnamed,unnamed,unnamed,unnamed,unnamed,unnamed,unnamed,unnamed,unnamed,unnamed,unnamed,unnamed,unnamed,unnamed,unnamed,unnamed,unnamed,unnamed,unnamed,unnamed,unnamed,unnamed,unnamed,unnamed,unnamed,unnamed,unnamed,unnamed,unnamed,unnamed,unnamed,unnamed,unnamed,unnamed,unnamed,unnamed,unnamed,unnamed,unnamed,unnamed,unnamed,unnamed,unnamed,unnamed,unnamed,unnamed,unnamed,unnamed,unnamed,unnamed…	AASDH,CDKAL1,EEF1G,EEF2,EIF3D,EIF4G1,EIF4G3,EIF4H,ENSG00000263809,GGT7,GNB2L1,MRPL15,MRPL48,N6AMT1,RPL10A,RPL11,RPL12,RPL13,RPL15,RPL17,RPL17-C18orf32,RPL18,RPL19,RPL23,RPL23A,RPL24,RPL26,RPL29,RPL3,RPL31,RPL32,RPL34,RPL35,RPL35A,RPL36,RPL36A,RPL36A-HNRNPH2,RPL37,RPL37A,RPL39,RPL41,RPL5,RPL6,RPL7,RPL7A,RPL7L1,RPL8,RPL9,RPS10,RPS14,RPS15,RPS15A,RPS17,RPS17L,RPS2,RPS24,RPS3,RPS3A,RPS4X,RPS4Y1,RPS6,…
GO Biological Process	GO:0019058	viral life cycle	20	1.92498e-26	2.4838e-22	1.2419e-23	5.69369	10.3623	59	0.0207247	0.118	15	4.88142e-28	6.2985e-24	4.199e-25	5.68349	10.3809	59	299	0.0916149	0.197324	unnamed,unnamed,unnamed,unnamed,unnamed,unnamed,unnamed,unnamed,unnamed,unnamed,unnamed,unnamed,unnamed,unnamed,unnamed,unnamed,unnamed,unnamed,unnamed,unnamed,unnamed,unnamed,unnamed,unnamed,unnamed,unnamed,unnamed,unnamed,unnamed,unnamed,unnamed,unnamed,unnamed,unnamed,unnamed,unnamed,unnamed,unnamed,unnamed,unnamed,unnamed,unnamed,unnamed,unnamed,unnamed,unnamed,unnamed,unnamed,unnamed,unnamed…	ATG16L2,CTBP2,DYNLT1,EIF3D,KPNA2,LRSAM1,NUP155,NUP205,POM121C,PVR,RPL10A,RPL11,RPL12,RPL13,RPL15,RPL17,RPL18,RPL19,RPL23,RPL23A,RPL24,RPL26,RPL29,RPL3,RPL31,RPL32,RPL34,RPL35,RPL35A,RPL36,RPL36A,RPL37,RPL37A,RPL39,RPL41,RPL5,RPL6,RPL7,RPL7A,RPL8,RPL9,RPS10,RPS14,RPS15,RPS15A,RPS17,RPS17L,RPS2,RPS24,RPS3,RPS3A,RPS4X,RPS4Y1,RPS6,RPS7,RPS8,SCARB1,SCARB2,THOC2
GO Biological Process	GO:0042254	ribosome biogenesis	21	3.42534e-26	4.41972e-22	2.10463e-23	5.99461	9.34173	56	0.0186835	0.112	23	7.27843e-24	9.39136e-20	4.0832e-21	5.02479	11.1448	56	321	0.0869565	0.174455	unnamed,unnamed,unnamed,unnamed,unnamed,unnamed,unnamed,unnamed,unnamed,unnamed,unnamed,unnamed,unnamed,unnamed,unnamed,unnamed,unnamed,unnamed,unnamed,unnamed,unnamed,unnamed,unnamed,unnamed,unnamed,unnamed,unnamed,unnamed,unnamed,unnamed,unnamed,unnamed,unnamed,unnamed,unnamed,unnamed,unnamed,unnamed,unnamed,unnamed,unnamed,unnamed,unnamed,unnamed,unnamed,unnamed,unnamed,unnamed,unnamed,unnamed…	CSNK1E,DDX31,DDX3X,DKC1,ENSG00000263809,NPM1,RIOK2,RPL10A,RPL11,RPL12,RPL13,RPL15,RPL17,RPL18,RPL19,RPL23,RPL23A,RPL24,RPL26,RPL29,RPL3,RPL31,RPL32,RPL34,RPL35,RPL35A,RPL36,RPL36A,RPL37,RPL37A,RPL39,RPL41,RPL5,RPL6,RPL7,RPL7A,RPL7L1,RPL8,RPL9,RPS10,RPS14,RPS15,RPS15A,RPS17,RPS17L,RPS2,RPS24,RPS3,RPS3A,RPS4X,RPS4Y1,RPS6,RPS7,RPS8,RRP1B,XRN2
GO Biological Process	GO:0034470	ncRNA processing	22	2.97627e-25	3.84028e-21	1.74558e-22	5.38782	10.9506	59	0.0219013	0.118	30	4.05126e-20	5.22734e-16	1.74245e-17	4.15635	13.714	57	395	0.0885093	0.144304	unnamed,unnamed,unnamed,unnamed,unnamed,unnamed,unnamed,unnamed,unnamed,unnamed,unnamed,unnamed,unnamed,unnamed,unnamed,unnamed,unnamed,unnamed,unnamed,unnamed,unnamed,unnamed,unnamed,unnamed,unnamed,unnamed,unnamed,unnamed,unnamed,unnamed,unnamed,unnamed,unnamed,unnamed,unnamed,unnamed,unnamed,unnamed,unnamed,unnamed,unnamed,unnamed,unnamed,unnamed,unnamed,unnamed,unnamed,unnamed,unnamed,unnamed…	CDKAL1,CSNK1E,CTU1,DKC1,ELP4,ELP6,RIOK2,RPL10A,RPL11,RPL12,RPL13,RPL15,RPL17,RPL18,RPL19,RPL23,RPL23A,RPL24,RPL26,RPL29,RPL3,RPL31,RPL32,RPL34,RPL35,RPL35A,RPL36,RPL36A,RPL37,RPL37A,RPL39,RPL41,RPL5,RPL6,RPL7,RPL7A,RPL7L1,RPL8,RPL9,RPS10,RPS14,RPS15,RPS15A,RPS17,RPS17L,RPS2,RPS24,RPS3,RPS3A,RPS4X,RPS4Y1,RPS6,RPS7,RPS8,RRP1B,USB1,XRN2
GO Biological Process	GO:0022613	ribonucleoprotein complex biogenesis	23	1.8812e-23	2.42731e-19	1.05535e-20	4.47161	14.5362	65	0.0290723	0.13	24	8.57254e-23	1.10612e-18	4.60881e-20	4.15118	15.6582	65	451	0.100932	0.144124	unnamed,unnamed,unnamed,unnamed,unnamed,unnamed,unnamed,unnamed,unnamed,unnamed,unnamed,unnamed,unnamed,unnamed,unnamed,unnamed,unnamed,unnamed,unnamed,unnamed,unnamed,unnamed,unnamed,unnamed,unnamed,unnamed,unnamed,unnamed,unnamed,unnamed,unnamed,unnamed,unnamed,unnamed,unnamed,unnamed,unnamed,unnamed,unnamed,unnamed,unnamed,unnamed,unnamed,unnamed,unnamed,unnamed,unnamed,unnamed,unnamed,unnamed…	BICD1,CSNK1E,DDX31,DDX3X,DKC1,DYNC1H1,EIF3D,EIF4H,ENSG00000263809,GRB7,NPM1,PRPF39,RIOK2,RPL10A,RPL11,RPL12,RPL13,RPL15,RPL17,RPL18,RPL19,RPL23,RPL23A,RPL24,RPL26,RPL29,RPL3,RPL31,RPL32,RPL34,RPL35,RPL35A,RPL36,RPL36A,RPL37,RPL37A,RPL39,RPL41,RPL5,RPL6,RPL7,RPL7A,RPL7L1,RPL8,RPL9,RPS10,RPS14,RPS15,RPS15A,RPS17,RPS17L,RPS2,RPS24,RPS3,RPS3A,RPS4X,RPS4Y1,RPS6,RPS7,RPS8,RRP1B,SNRPB,TGS1,USP39,XRN2
GO Biological Process	GO:0006518	peptide metabolic process	24	3.39721e-22	4.38342e-18	1.82642e-19	3.9952	17.2707	69	0.0345415	0.138	27	1.93354e-21	2.49484e-17	9.24016e-19	3.77378	18.0191	68	519	0.10559	0.131021	unnamed,unnamed,unnamed,unnamed,unnamed,unnamed,unnamed,unnamed,unnamed,unnamed,unnamed,unnamed,unnamed,unnamed,unnamed,unnamed,unnamed,unnamed,unnamed,unnamed,unnamed,unnamed,unnamed,unnamed,unnamed,unnamed,unnamed,unnamed,unnamed,unnamed,unnamed,unnamed,unnamed,unnamed,unnamed,unnamed,unnamed,unnamed,unnamed,unnamed,unnamed,unnamed,unnamed,unnamed,unnamed,unnamed,unnamed,unnamed,unnamed,unnamed…	AASDH,ADAMTS13,CDKAL1,CORIN,EEF1G,EEF2,EIF3D,EIF4G1,EIF4G3,EIF4H,ENSG00000263809,GGT7,GLO1,GNB2L1,GSTM1,MRPL15,MRPL48,N6AMT1,RPL10A,RPL11,RPL12,RPL13,RPL15,RPL17,RPL17-C18orf32,RPL18,RPL19,RPL23,RPL23A,RPL24,RPL26,RPL29,RPL3,RPL31,RPL32,RPL34,RPL35,RPL35A,RPL36,RPL36A,RPL36A-HNRNPH2,RPL37,RPL37A,RPL39,RPL41,RPL5,RPL6,RPL7,RPL7A,RPL7L1,RPL8,RPL9,RPS10,RPS14,RPS15,RPS15A,RPS17,RPS17L,RPS2,RPS24,RPS…
GO Biological Process	GO:0043604	amide biosynthetic process	25	9.79829e-22	1.26427e-17	5.05709e-19	4.08284	16.1652	66	0.0323304	0.132	26	3.67754e-22	4.74513e-18	1.82505e-19	4.04359	16.0748	65	463	0.100932	0.140389	unnamed,unnamed,unnamed,unnamed,unnamed,unnamed,unnamed,unnamed,unnamed,unnamed,unnamed,unnamed,unnamed,unnamed,unnamed,unnamed,unnamed,unnamed,unnamed,unnamed,unnamed,unnamed,unnamed,unnamed,unnamed,unnamed,unnamed,unnamed,unnamed,unnamed,unnamed,unnamed,unnamed,unnamed,unnamed,unnamed,unnamed,unnamed,unnamed,unnamed,unnamed,unnamed,unnamed,unnamed,unnamed,unnamed,unnamed,unnamed,unnamed,unnamed…	AASDH,CDKAL1,EEF1G,EEF2,EIF3D,EIF4G1,EIF4G3,EIF4H,ENSG00000263809,GGT7,GNB2L1,MRPL15,MRPL48,N6AMT1,RPL10A,RPL11,RPL12,RPL13,RPL15,RPL17,RPL17-C18orf32,RPL18,RPL19,RPL23,RPL23A,RPL24,RPL26,RPL29,RPL3,RPL31,RPL32,RPL34,RPL35,RPL35A,RPL36,RPL36A,RPL36A-HNRNPH2,RPL37,RPL37A,RPL39,RPL41,RPL5,RPL6,RPL7,RPL7A,RPL7L1,RPL8,RPL9,RPS10,RPS14,RPS15,RPS15A,RPS17,RPS17L,RPS2,RPS24,RPS3,RPS3A,RPS4X,RPS4Y1,RPS6,…
GO Biological Process	GO:0072594	establishment of protein localization to organelle	26	1.78913e-21	2.30852e-17	8.87891e-19	4.21826	14.9351	63	0.0298702	0.126	18	9.56711e-26	1.23444e-21	6.85802e-23	4.90597	12.6377	62	364	0.0962733	0.17033	unnamed,unnamed,unnamed,unnamed,unnamed,unnamed,unnamed,unnamed,unnamed,unnamed,unnamed,unnamed,unnamed,unnamed,unnamed,unnamed,unnamed,unnamed,unnamed,unnamed,unnamed,unnamed,unnamed,unnamed,unnamed,unnamed,unnamed,unnamed,unnamed,unnamed,unnamed,unnamed,unnamed,unnamed,unnamed,unnamed,unnamed,unnamed,unnamed,unnamed,unnamed,unnamed,unnamed,unnamed,unnamed,unnamed,unnamed,unnamed,unnamed,unnamed…	AP3B1,ARNTL,HSPA4,IPO9,KPNA2,MTX2,NUP155,PEX14,PMAIP1,POM121C,PPP3CA,RANBP6,RPL10A,RPL11,RPL12,RPL13,RPL15,RPL17,RPL18,RPL19,RPL23,RPL23A,RPL24,RPL26,RPL29,RPL3,RPL31,RPL32,RPL34,RPL35,RPL35A,RPL36,RPL36A,RPL37,RPL37A,RPL39,RPL41,RPL5,RPL6,RPL7,RPL7A,RPL8,RPL9,RPS10,RPS14,RPS15,RPS15A,RPS17,RPS17L,RPS2,RPS24,RPS3,RPS3A,RPS4X,RPS4Y1,RPS6,RPS7,RPS8,SCARB2,SPTBN1,TNFAIP3,TOMM20
GO Biological Process	GO:0034655	nucleobase-containing compound catabolic process	27	1.90442e-20	2.45727e-16	9.10101e-18	4.50755	12.4236	56	0.0248472	0.112	28	8.45703e-21	1.09121e-16	3.89718e-18	4.43741	12.3946	55	357	0.0854037	0.154062	unnamed,unnamed,unnamed,unnamed,unnamed,unnamed,unnamed,unnamed,unnamed,unnamed,unnamed,unnamed,unnamed,unnamed,unnamed,unnamed,unnamed,unnamed,unnamed,unnamed,unnamed,unnamed,unnamed,unnamed,unnamed,unnamed,unnamed,unnamed,unnamed,unnamed,unnamed,unnamed,unnamed,unnamed,unnamed,unnamed,unnamed,unnamed,unnamed,unnamed,unnamed,unnamed,unnamed,unnamed,unnamed,unnamed,unnamed,unnamed,unnamed,unnamed…	CNOT6L,CTIF,DFFA,DNASE1L1,EIF4G1,PNP,PPP2R2A,RNPS1,RPL10A,RPL11,RPL12,RPL13,RPL15,RPL17,RPL18,RPL19,RPL23,RPL23A,RPL24,RPL26,RPL29,RPL3,RPL31,RPL32,RPL34,RPL35,RPL35A,RPL36,RPL36A,RPL37,RPL37A,RPL39,RPL41,RPL5,RPL6,RPL7,RPL7A,RPL8,RPL9,RPS10,RPS14,RPS15,RPS15A,RPS17,RPS17L,RPS2,RPS24,RPS3,RPS3A,RPS4X,RPS4Y1,RPS6,RPS7,RPS8,XRN2
GO Biological Process	GO:0034660	ncRNA metabolic process	28	2.37225e-20	3.06091e-16	1.09318e-17	4.00346	15.7364	63	0.0314727	0.126	45	1.10471e-15	1.42541e-11	3.16757e-13	3.17716	19.1995	61	553	0.0947205	0.110307	unnamed,unnamed,unnamed,unnamed,unnamed,unnamed,unnamed,unnamed,unnamed,unnamed,unnamed,unnamed,unnamed,unnamed,unnamed,unnamed,unnamed,unnamed,unnamed,unnamed,unnamed,unnamed,unnamed,unnamed,unnamed,unnamed,unnamed,unnamed,unnamed,unnamed,unnamed,unnamed,unnamed,unnamed,unnamed,unnamed,unnamed,unnamed,unnamed,unnamed,unnamed,unnamed,unnamed,unnamed,unnamed,unnamed,unnamed,unnamed,unnamed,unnamed…	CDKAL1,CSNK1E,CTU1,DKC1,ELP4,ELP6,GTF3C4,POLR1E,POLR2K,RIOK2,RPL10A,RPL11,RPL12,RPL13,RPL15,RPL17,RPL18,RPL19,RPL23,RPL23A,RPL24,RPL26,RPL29,RPL3,RPL31,RPL32,RPL34,RPL35,RPL35A,RPL36,RPL36A,RPL37,RPL37A,RPL39,RPL41,RPL5,RPL6,RPL7,RPL7A,RPL7L1,RPL8,RPL9,RPS10,RPS14,RPS15,RPS15A,RPS17,RPS17L,RPS2,RPS24,RPS3,RPS3A,RPS4X,RPS4Y1,RPS6,RPS7,RPS8,RRP1B,USB1,WARS2,XRN2
GO Biological Process	GO:0006605	protein targeting	29	4.63679e-20	5.98285e-16	2.06305e-17	3.89276	16.4408	64	0.0328816	0.128	22	1.01527e-24	1.31001e-20	5.95458e-22	4.62902	13.6098	63	392	0.0978261	0.160714	unnamed,unnamed,unnamed,unnamed,unnamed,unnamed,unnamed,unnamed,unnamed,unnamed,unnamed,unnamed,unnamed,unnamed,unnamed,unnamed,unnamed,unnamed,unnamed,unnamed,unnamed,unnamed,unnamed,unnamed,unnamed,unnamed,unnamed,unnamed,unnamed,unnamed,unnamed,unnamed,unnamed,unnamed,unnamed,unnamed,unnamed,unnamed,unnamed,unnamed,unnamed,unnamed,unnamed,unnamed,unnamed,unnamed,unnamed,unnamed,unnamed,unnamed…	AKAP12,AP3B1,ARNTL,EXOC4,HSPA4,IPO9,KPNA2,MTX2,NUP155,PEX14,POM121C,PPP3CA,RANBP6,RPL10A,RPL11,RPL12,RPL13,RPL15,RPL17,RPL18,RPL19,RPL23,RPL23A,RPL24,RPL26,RPL29,RPL3,RPL31,RPL32,RPL34,RPL35,RPL35A,RPL36,RPL36A,RPL37,RPL37A,RPL39,RPL41,RPL5,RPL6,RPL7,RPL7A,RPL8,RPL9,RPS10,RPS14,RPS15,RPS15A,RPS17,RPS17L,RPS2,RPS24,RPS3,RPS3A,RPS4X,RPS4Y1,RPS6,RPS7,RPS8,SCARB2,SPTBN1,TOMM20,YWHAE
GO Biological Process	GO:1901361	organic cyclic compound catabolic process	30	1.31439e-18	1.69596e-14	5.65319e-16	3.8468	15.5974	60	0.0311947	0.12	34	3.72193e-19	4.80241e-15	1.41247e-16	3.85344	15.311	59	441	0.0916149	0.133787	unnamed,unnamed,unnamed,unnamed,unnamed,unnamed,unnamed,unnamed,unnamed,unnamed,unnamed,unnamed,unnamed,unnamed,unnamed,unnamed,unnamed,unnamed,unnamed,unnamed,unnamed,unnamed,unnamed,unnamed,unnamed,unnamed,unnamed,unnamed,unnamed,unnamed,unnamed,unnamed,unnamed,unnamed,unnamed,unnamed,unnamed,unnamed,unnamed,unnamed,unnamed,unnamed,unnamed,unnamed,unnamed,unnamed,unnamed,unnamed,unnamed,unnamed…	CEL,CNOT6L,CTIF,DFFA,DNASE1L1,EIF4G1,PNP,PPP2R2A,RNPS1,RPL10A,RPL11,RPL12,RPL13,RPL15,RPL17,RPL18,RPL19,RPL23,RPL23A,RPL24,RPL26,RPL29,RPL3,RPL31,RPL32,RPL34,RPL35,RPL35A,RPL36,RPL36A,RPL37,RPL37A,RPL39,RPL41,RPL5,RPL6,RPL7,RPL7A,RPL8,RPL9,RPS10,RPS14,RPS15,RPS15A,RPS17,RPS17L,RPS2,RPS24,RPS3,RPS3A,RPS4X,RPS4Y1,RPS6,RPS7,RPS8,SCARB1,TRERF1,XRN2,YWHAH
GO Biological Process	GO:0016032	viral process	31	3.41554e-18	4.40707e-14	1.42164e-15	3.17222	23.3275	74	0.0466551	0.148	31	4.64716e-20	5.99623e-16	1.93427e-17	3.36956	21.6646	73	624	0.113354	0.116987	unnamed,unnamed,unnamed,unnamed,unnamed,unnamed,unnamed,unnamed,unnamed,unnamed,unnamed,unnamed,unnamed,unnamed,unnamed,unnamed,unnamed,unnamed,unnamed,unnamed,unnamed,unnamed,unnamed,unnamed,unnamed,unnamed,unnamed,unnamed,unnamed,unnamed,unnamed,unnamed,unnamed,unnamed,unnamed,unnamed,unnamed,unnamed,unnamed,unnamed,unnamed,unnamed,unnamed,unnamed,unnamed,unnamed,unnamed,unnamed,unnamed,unnamed…	ANKRD17,ATG16L2,BICD1,CTBP2,CUL5,DDX3X,DYNLT1,EIF3D,EIF4G1,EIF4G3,EIF4H,FBLN1,GNB2L1,KPNA2,LRSAM1,MAGI3,NPM1,NUP155,NUP205,POM121C,PVR,RPL10A,RPL11,RPL12,RPL13,RPL15,RPL17,RPL18,RPL19,RPL23,RPL23A,RPL24,RPL26,RPL29,RPL3,RPL31,RPL32,RPL34,RPL35,RPL35A,RPL36,RPL36A,RPL37,RPL37A,RPL39,RPL41,RPL5,RPL6,RPL7,RPL7A,RPL8,RPL9,RPS10,RPS14,RPS15,RPS15A,RPS17,RPS17L,RPS2,RPS24,RPS3,RPS3A,RPS4X,RPS4Y1,RPS6,R…
GO Biological Process	GO:0046700	heterocycle catabolic process	32	4.22131e-18	5.44675e-14	1.70211e-15	3.98927	14.0376	56	0.0280753	0.112	37	2.27779e-18	2.93904e-14	7.94335e-16	3.94068	13.957	55	402	0.0854037	0.136816	unnamed,unnamed,unnamed,unnamed,unnamed,unnamed,unnamed,unnamed,unnamed,unnamed,unnamed,unnamed,unnamed,unnamed,unnamed,unnamed,unnamed,unnamed,unnamed,unnamed,unnamed,unnamed,unnamed,unnamed,unnamed,unnamed,unnamed,unnamed,unnamed,unnamed,unnamed,unnamed,unnamed,unnamed,unnamed,unnamed,unnamed,unnamed,unnamed,unnamed,unnamed,unnamed,unnamed,unnamed,unnamed,unnamed,unnamed,unnamed,unnamed,unnamed…	CNOT6L,CTIF,DFFA,DNASE1L1,EIF4G1,PNP,PPP2R2A,RNPS1,RPL10A,RPL11,RPL12,RPL13,RPL15,RPL17,RPL18,RPL19,RPL23,RPL23A,RPL24,RPL26,RPL29,RPL3,RPL31,RPL32,RPL34,RPL35,RPL35A,RPL36,RPL36A,RPL37,RPL37A,RPL39,RPL41,RPL5,RPL6,RPL7,RPL7A,RPL8,RPL9,RPS10,RPS14,RPS15,RPS15A,RPS17,RPS17L,RPS2,RPS24,RPS3,RPS3A,RPS4X,RPS4Y1,RPS6,RPS7,RPS8,XRN2
GO Biological Process	GO:0044270	cellular nitrogen compound catabolic process	33	4.81015e-18	6.20653e-14	1.88077e-15	3.9773	14.0799	56	0.0281598	0.112	38	2.86284e-18	3.69392e-14	9.72085e-16	3.92117	14.0264	55	404	0.0854037	0.136139	unnamed,unnamed,unnamed,unnamed,unnamed,unnamed,unnamed,unnamed,unnamed,unnamed,unnamed,unnamed,unnamed,unnamed,unnamed,unnamed,unnamed,unnamed,unnamed,unnamed,unnamed,unnamed,unnamed,unnamed,unnamed,unnamed,unnamed,unnamed,unnamed,unnamed,unnamed,unnamed,unnamed,unnamed,unnamed,unnamed,unnamed,unnamed,unnamed,unnamed,unnamed,unnamed,unnamed,unnamed,unnamed,unnamed,unnamed,unnamed,unnamed,unnamed…	CNOT6L,CTIF,DFFA,DNASE1L1,EIF4G1,PNP,PPP2R2A,RNPS1,RPL10A,RPL11,RPL12,RPL13,RPL15,RPL17,RPL18,RPL19,RPL23,RPL23A,RPL24,RPL26,RPL29,RPL3,RPL31,RPL32,RPL34,RPL35,RPL35A,RPL36,RPL36A,RPL37,RPL37A,RPL39,RPL41,RPL5,RPL6,RPL7,RPL7A,RPL8,RPL9,RPS10,RPS14,RPS15,RPS15A,RPS17,RPS17L,RPS2,RPS24,RPS3,RPS3A,RPS4X,RPS4Y1,RPS6,RPS7,RPS8,XRN2
GO Biological Process	GO:0044764	multi-organism cellular process	34	8.67074e-18	1.11879e-13	3.29055e-15	3.11732	23.7384	74	0.0474767	0.148	33	1.38951e-19	1.79288e-15	5.43298e-17	3.30598	22.0812	73	636	0.113354	0.11478	unnamed,unnamed,unnamed,unnamed,unnamed,unnamed,unnamed,unnamed,unnamed,unnamed,unnamed,unnamed,unnamed,unnamed,unnamed,unnamed,unnamed,unnamed,unnamed,unnamed,unnamed,unnamed,unnamed,unnamed,unnamed,unnamed,unnamed,unnamed,unnamed,unnamed,unnamed,unnamed,unnamed,unnamed,unnamed,unnamed,unnamed,unnamed,unnamed,unnamed,unnamed,unnamed,unnamed,unnamed,unnamed,unnamed,unnamed,unnamed,unnamed,unnamed…	ANKRD17,ATG16L2,BICD1,CTBP2,CUL5,DDX3X,DYNLT1,EIF3D,EIF4G1,EIF4G3,EIF4H,FBLN1,GNB2L1,KPNA2,LRSAM1,MAGI3,NPM1,NUP155,NUP205,POM121C,PVR,RPL10A,RPL11,RPL12,RPL13,RPL15,RPL17,RPL18,RPL19,RPL23,RPL23A,RPL24,RPL26,RPL29,RPL3,RPL31,RPL32,RPL34,RPL35,RPL35A,RPL36,RPL36A,RPL37,RPL37A,RPL39,RPL41,RPL5,RPL6,RPL7,RPL7A,RPL8,RPL9,RPS10,RPS14,RPS15,RPS15A,RPS17,RPS17L,RPS2,RPS24,RPS3,RPS3A,RPS4X,RPS4Y1,RPS6,R…
GO Biological Process	GO:0019439	aromatic compound catabolic process	35	4.05822e-17	5.23633e-13	1.49609e-14	3.78532	14.794	56	0.029588	0.112	39	9.79316e-18	1.26361e-13	3.24003e-15	3.81724	14.4083	55	415	0.0854037	0.13253	unnamed,unnamed,unnamed,unnamed,unnamed,unnamed,unnamed,unnamed,unnamed,unnamed,unnamed,unnamed,unnamed,unnamed,unnamed,unnamed,unnamed,unnamed,unnamed,unnamed,unnamed,unnamed,unnamed,unnamed,unnamed,unnamed,unnamed,unnamed,unnamed,unnamed,unnamed,unnamed,unnamed,unnamed,unnamed,unnamed,unnamed,unnamed,unnamed,unnamed,unnamed,unnamed,unnamed,unnamed,unnamed,unnamed,unnamed,unnamed,unnamed,unnamed…	CNOT6L,CTIF,DFFA,DNASE1L1,EIF4G1,PNP,PPP2R2A,RNPS1,RPL10A,RPL11,RPL12,RPL13,RPL15,RPL17,RPL18,RPL19,RPL23,RPL23A,RPL24,RPL26,RPL29,RPL3,RPL31,RPL32,RPL34,RPL35,RPL35A,RPL36,RPL36A,RPL37,RPL37A,RPL39,RPL41,RPL5,RPL6,RPL7,RPL7A,RPL8,RPL9,RPS10,RPS14,RPS15,RPS15A,RPS17,RPS17L,RPS2,RPS24,RPS3,RPS3A,RPS4X,RPS4Y1,RPS6,RPS7,RPS8,XRN2
GO Biological Process	GO:0006396	RNA processing	36	6.37116e-17	8.2207e-13	2.28353e-14	2.74729	30.5756	84	0.0611512	0.168	43	7.08002e-16	9.13536e-12	2.1245e-13	2.65117	30.5526	81	880	0.125776	0.0920455	unnamed,unnamed,unnamed,unnamed,unnamed,unnamed,unnamed,unnamed,unnamed,unnamed,unnamed,unnamed,unnamed,unnamed,unnamed,unnamed,unnamed,unnamed,unnamed,unnamed,unnamed,unnamed,unnamed,unnamed,unnamed,unnamed,unnamed,unnamed,unnamed,unnamed,unnamed,unnamed,unnamed,unnamed,unnamed,unnamed,unnamed,unnamed,unnamed,unnamed,unnamed,unnamed,unnamed,unnamed,unnamed,unnamed,unnamed,unnamed,unnamed,unnamed…	ACIN1,BICD1,CDKAL1,CNOT6L,CSNK1E,CTU1,DDX19B,DDX54,DHX35,DKC1,ELP4,ELP6,HNRNPA3,KDM1A,LARP6,PAPD7,POLR2K,PPP1R9B,PRPF39,PUM1,RBFOX1,RBM39,RIOK2,RNPS1,RPL10A,RPL11,RPL12,RPL13,RPL15,RPL17,RPL18,RPL19,RPL23,RPL23A,RPL24,RPL26,RPL29,RPL3,RPL31,RPL32,RPL34,RPL35,RPL35A,RPL36,RPL36A,RPL37,RPL37A,RPL39,RPL41,RPL5,RPL6,RPL7,RPL7A,RPL7L1,RPL8,RPL9,RPS10,RPS14,RPS15,RPS15A,RPS17,RPS17L,RPS2,RPS24,RPS3,RPS…
GO Biological Process	GO:0044403	symbiosis, encompassing mutualism through parasitism	37	8.07197e-17	1.04153e-12	2.81494e-14	2.93154	25.9249	76	0.0518498	0.152	35	9.97416e-19	1.28697e-14	3.67705e-16	3.13074	23.956	75	690	0.11646	0.108696	unnamed,unnamed,unnamed,unnamed,unnamed,unnamed,unnamed,unnamed,unnamed,unnamed,unnamed,unnamed,unnamed,unnamed,unnamed,unnamed,unnamed,unnamed,unnamed,unnamed,unnamed,unnamed,unnamed,unnamed,unnamed,unnamed,unnamed,unnamed,unnamed,unnamed,unnamed,unnamed,unnamed,unnamed,unnamed,unnamed,unnamed,unnamed,unnamed,unnamed,unnamed,unnamed,unnamed,unnamed,unnamed,unnamed,unnamed,unnamed,unnamed,unnamed…	ANKRD17,ATG16L2,BICD1,CHD1,CTBP2,CUL5,DDX3X,DYNLT1,EIF3D,EIF4G1,EIF4G3,EIF4H,FBLN1,GNB2L1,KPNA2,LRSAM1,MAGI3,NPM1,NUP155,NUP205,POM121C,PVR,RPL10A,RPL11,RPL12,RPL13,RPL15,RPL17,RPL18,RPL19,RPL23,RPL23A,RPL24,RPL26,RPL29,RPL3,RPL31,RPL32,RPL34,RPL35,RPL35A,RPL36,RPL36A,RPL37,RPL37A,RPL39,RPL41,RPL5,RPL6,RPL7,RPL7A,RPL8,RPL9,RPS10,RPS14,RPS15,RPS15A,RPS17,RPS17L,RPS2,RPS24,RPS3,RPS3A,RPS4X,RPS4Y1,R…
GO Biological Process	GO:0044419	interspecies interaction between organisms	38	9.11163e-17	1.17567e-12	3.09388e-14	2.92488	25.984	76	0.051968	0.152	36	1.17759e-18	1.51944e-14	4.22066e-16	3.12169	24.0254	75	692	0.11646	0.108382	unnamed,unnamed,unnamed,unnamed,unnamed,unnamed,unnamed,unnamed,unnamed,unnamed,unnamed,unnamed,unnamed,unnamed,unnamed,unnamed,unnamed,unnamed,unnamed,unnamed,unnamed,unnamed,unnamed,unnamed,unnamed,unnamed,unnamed,unnamed,unnamed,unnamed,unnamed,unnamed,unnamed,unnamed,unnamed,unnamed,unnamed,unnamed,unnamed,unnamed,unnamed,unnamed,unnamed,unnamed,unnamed,unnamed,unnamed,unnamed,unnamed,unnamed…	ANKRD17,ATG16L2,BICD1,CHD1,CTBP2,CUL5,DDX3X,DYNLT1,EIF3D,EIF4G1,EIF4G3,EIF4H,FBLN1,GNB2L1,KPNA2,LRSAM1,MAGI3,NPM1,NUP155,NUP205,POM121C,PVR,RPL10A,RPL11,RPL12,RPL13,RPL15,RPL17,RPL18,RPL19,RPL23,RPL23A,RPL24,RPL26,RPL29,RPL3,RPL31,RPL32,RPL34,RPL35,RPL35A,RPL36,RPL36A,RPL37,RPL37A,RPL39,RPL41,RPL5,RPL6,RPL7,RPL7A,RPL8,RPL9,RPS10,RPS14,RPS15,RPS15A,RPS17,RPS17L,RPS2,RPS24,RPS3,RPS3A,RPS4X,RPS4Y1,R…
GO Biological Process	GO:0016071	mRNA metabolic process	39	1.49216e-16	1.92533e-12	4.93674e-14	3.04283	23.3335	71	0.0466671	0.142	41	2.20727e-17	2.84804e-13	6.94644e-15	3.11141	22.4978	70	648	0.108696	0.108025	unnamed,unnamed,unnamed,unnamed,unnamed,unnamed,unnamed,unnamed,unnamed,unnamed,unnamed,unnamed,unnamed,unnamed,unnamed,unnamed,unnamed,unnamed,unnamed,unnamed,unnamed,unnamed,unnamed,unnamed,unnamed,unnamed,unnamed,unnamed,unnamed,unnamed,unnamed,unnamed,unnamed,unnamed,unnamed,unnamed,unnamed,unnamed,unnamed,unnamed,unnamed,unnamed,unnamed,unnamed,unnamed,unnamed,unnamed,unnamed,unnamed,unnamed…	ACIN1,CNOT6L,CTIF,DHX35,DKC1,EIF4G1,HNRNPA3,KDM1A,PAPD7,POLR2K,PPP2R2A,PRPF39,RBFOX1,RBM39,RNPS1,RPL10A,RPL11,RPL12,RPL13,RPL15,RPL17,RPL18,RPL19,RPL23,RPL23A,RPL24,RPL26,RPL29,RPL3,RPL31,RPL32,RPL34,RPL35,RPL35A,RPL36,RPL36A,RPL37,RPL37A,RPL39,RPL41,RPL5,RPL6,RPL7,RPL7A,RPL8,RPL9,RPS10,RPS14,RPS15,RPS15A,RPS17,RPS17L,RPS2,RPS24,RPS3,RPS3A,RPS4X,RPS4Y1,RPS6,RPS7,RPS8,SF3B3,SNRPB,SPEN,TGS1,THOC2,U…
GO Biological Process	GO:0033365	protein localization to organelle	40	1.89722e-16	2.44798e-12	6.11995e-14	2.93946	25.1747	74	0.0503494	0.148	25	3.62318e-22	4.67499e-18	1.87e-19	3.61869	20.4494	74	589	0.114907	0.125637	unnamed,unnamed,unnamed,unnamed,unnamed,unnamed,unnamed,unnamed,unnamed,unnamed,unnamed,unnamed,unnamed,unnamed,unnamed,unnamed,unnamed,unnamed,unnamed,unnamed,unnamed,unnamed,unnamed,unnamed,unnamed,unnamed,unnamed,unnamed,unnamed,unnamed,unnamed,unnamed,unnamed,unnamed,unnamed,unnamed,unnamed,unnamed,unnamed,unnamed,unnamed,unnamed,unnamed,unnamed,unnamed,unnamed,unnamed,unnamed,unnamed,unnamed…	AP3B1,ARNTL,BANP,BICD1,DDX3X,DNAJA1,HSPA4,IPO9,KPNA2,MTX2,NUP155,PAQR3,PAX6,PEX14,PMAIP1,POM121C,PPP3CA,RAB11FIP3,RANBP6,RPL10A,RPL11,RPL12,RPL13,RPL15,RPL17,RPL18,RPL19,RPL23,RPL23A,RPL24,RPL26,RPL29,RPL3,RPL31,RPL32,RPL34,RPL35,RPL35A,RPL36,RPL36A,RPL37,RPL37A,RPL39,RPL41,RPL5,RPL6,RPL7,RPL7A,RPL8,RPL9,RPS10,RPS14,RPS15,RPS15A,RPS17,RPS17L,RPS2,RPS24,RPS3,RPS3A,RPS4X,RPS4Y1,RPS6,RPS7,RPS8,SCARB…
GO Biological Process	GO:0002181	cytoplasmic translation	41	3.2775e-16	4.22896e-12	1.03145e-13	18.0461	0.942035	17	0.00188407	0.034	46	1.15034e-15	1.48428e-11	3.2267e-13	12.057	1.49291	18	43	0.0279503	0.418605	unnamed,unnamed,unnamed,unnamed,unnamed,unnamed,unnamed,unnamed,unnamed,unnamed,unnamed,unnamed,unnamed,unnamed,unnamed,unnamed,unnamed	EIF3D,EIF4G1,ENSG00000263809,RPL15,RPL26,RPL29,RPL31,RPL35A,RPL36,RPL36A,RPL6,RPL7,RPL7L1,RPL8,RPL9,RPS3,RPS3A,RPS7
GO Biological Process	GO:0043603	cellular amide metabolic process	42	9.70345e-16	1.25204e-11	2.98104e-13	2.96064	23.6435	70	0.047287	0.14	44	7.18842e-16	9.27522e-12	2.108e-13	2.93993	23.4699	69	676	0.107143	0.102071	unnamed,unnamed,unnamed,unnamed,unnamed,unnamed,unnamed,unnamed,unnamed,unnamed,unnamed,unnamed,unnamed,unnamed,unnamed,unnamed,unnamed,unnamed,unnamed,unnamed,unnamed,unnamed,unnamed,unnamed,unnamed,unnamed,unnamed,unnamed,unnamed,unnamed,unnamed,unnamed,unnamed,unnamed,unnamed,unnamed,unnamed,unnamed,unnamed,unnamed,unnamed,unnamed,unnamed,unnamed,unnamed,unnamed,unnamed,unnamed,unnamed,unnamed…	AASDH,ADAMTS13,CDKAL1,CORIN,EEF1G,EEF2,EIF3D,EIF4G1,EIF4G3,EIF4H,ENSG00000263809,GGT7,GLO1,GNB2L1,GSTM1,MRPL15,MRPL48,N6AMT1,RPL10A,RPL11,RPL12,RPL13,RPL15,RPL17,RPL17-C18orf32,RPL18,RPL19,RPL23,RPL23A,RPL24,RPL26,RPL29,RPL3,RPL31,RPL32,RPL34,RPL35,RPL35A,RPL36,RPL36A,RPL36A-HNRNPH2,RPL37,RPL37A,RPL39,RPL41,RPL5,RPL6,RPL7,RPL7A,RPL7L1,RPL8,RPL9,RPS10,RPS14,RPS15,RPS15A,RPS17,RPS17L,RPS2,RPS24,RPS…
GO Biological Process	GO:1902582	single-organism intracellular transport	43	5.77934e-15	7.45708e-11	1.73421e-12	2.80002	25.7141	72	0.0514283	0.144	32	8.21901e-20	1.0605e-15	3.31406e-17	3.37203	21.3521	72	615	0.111801	0.117073	unnamed,unnamed,unnamed,unnamed,unnamed,unnamed,unnamed,unnamed,unnamed,unnamed,unnamed,unnamed,unnamed,unnamed,unnamed,unnamed,unnamed,unnamed,unnamed,unnamed,unnamed,unnamed,unnamed,unnamed,unnamed,unnamed,unnamed,unnamed,unnamed,unnamed,unnamed,unnamed,unnamed,unnamed,unnamed,unnamed,unnamed,unnamed,unnamed,unnamed,unnamed,unnamed,unnamed,unnamed,unnamed,unnamed,unnamed,unnamed,unnamed,unnamed…	AP3B1,ARL3,ARNTL,BICD1,BTK,DYNC1H1,DYNC1I1,EXOC4,HSPA4,IPO9,KPNA2,NPM1,NUP155,NUP205,PEX14,POM121C,PPP3CA,RANBP6,RILPL1,RPL10A,RPL11,RPL12,RPL13,RPL15,RPL17,RPL18,RPL19,RPL23,RPL23A,RPL24,RPL26,RPL29,RPL3,RPL31,RPL32,RPL34,RPL35,RPL35A,RPL36,RPL36A,RPL37,RPL37A,RPL39,RPL41,RPL5,RPL6,RPL7,RPL7A,RPL8,RPL9,RPS10,RPS14,RPS15,RPS15A,RPS17,RPS17L,RPS2,RPS24,RPS3,RPS3A,RPS4X,RPS4Y1,RPS6,RPS7,RPS8,SPTBN1…
GO Biological Process	GO:0072657	protein localization to membrane	44	7.36745e-15	9.50622e-11	2.1605e-12	3.25357	17.8266	58	0.0356531	0.116	29	1.14474e-20	1.47706e-16	5.0933e-18	4.19739	13.8181	58	398	0.0900621	0.145729	unnamed,unnamed,unnamed,unnamed,unnamed,unnamed,unnamed,unnamed,unnamed,unnamed,unnamed,unnamed,unnamed,unnamed,unnamed,unnamed,unnamed,unnamed,unnamed,unnamed,unnamed,unnamed,unnamed,unnamed,unnamed,unnamed,unnamed,unnamed,unnamed,unnamed,unnamed,unnamed,unnamed,unnamed,unnamed,unnamed,unnamed,unnamed,unnamed,unnamed,unnamed,unnamed,unnamed,unnamed,unnamed,unnamed,unnamed,unnamed,unnamed,unnamed…	ANK1,EXOC4,HSPA4,NUP155,PMAIP1,RAB34,RILPL1,RPL10A,RPL11,RPL12,RPL13,RPL15,RPL17,RPL18,RPL19,RPL23,RPL23A,RPL24,RPL26,RPL29,RPL3,RPL31,RPL32,RPL34,RPL35,RPL35A,RPL36,RPL36A,RPL37,RPL37A,RPL39,RPL41,RPL5,RPL6,RPL7,RPL7A,RPL8,RPL9,RPS10,RPS14,RPS15,RPS15A,RPS17,RPS17L,RPS2,RPS24,RPS3,RPS3A,RPS4X,RPS4Y1,RPS6,RPS7,RPS8,SPTBN1,TIAM1,TSPAN14,WRB,ZFYVE27
GO Biological Process	GO:0006886	intracellular protein transport	45	4.09014e-14	5.27751e-10	1.17278e-11	2.66623	27.3795	73	0.054759	0.146	40	1.86128e-17	2.40162e-13	6.00404e-15	3.02969	24.0949	73	694	0.113354	0.105187	unnamed,unnamed,unnamed,unnamed,unnamed,unnamed,unnamed,unnamed,unnamed,unnamed,unnamed,unnamed,unnamed,unnamed,unnamed,unnamed,unnamed,unnamed,unnamed,unnamed,unnamed,unnamed,unnamed,unnamed,unnamed,unnamed,unnamed,unnamed,unnamed,unnamed,unnamed,unnamed,unnamed,unnamed,unnamed,unnamed,unnamed,unnamed,unnamed,unnamed,unnamed,unnamed,unnamed,unnamed,unnamed,unnamed,unnamed,unnamed,unnamed,unnamed…	AKAP12,AP3B1,ARFGAP3,ARL3,ARNTL,DYNLT1,EXOC4,HSPA4,IPO9,KPNA2,MTX2,NPM1,NUP155,PEX14,POM121C,PPP3CA,RANBP6,RHBDD1,RILPL1,RPL10A,RPL11,RPL12,RPL13,RPL15,RPL17,RPL18,RPL19,RPL23,RPL23A,RPL24,RPL26,RPL29,RPL3,RPL31,RPL32,RPL34,RPL35,RPL35A,RPL36,RPL36A,RPL37,RPL37A,RPL39,RPL41,RPL5,RPL6,RPL7,RPL7A,RPL8,RPL9,RPS10,RPS14,RPS15,RPS15A,RPS17,RPS17L,RPS2,RPS24,RPS3,RPS3A,RPS4X,RPS4Y1,RPS6,RPS7,RPS8,SCARB…
GO Biological Process	GO:0044265	cellular macromolecule catabolic process	46	3.84294e-12	4.95855e-08	1.07795e-09	2.38631	31.4292	75	0.0628585	0.15	48	6.25225e-14	8.06728e-10	1.68068e-11	2.55646	29.3374	75	845	0.11646	0.0887574	unnamed,unnamed,unnamed,unnamed,unnamed,unnamed,unnamed,unnamed,unnamed,unnamed,unnamed,unnamed,unnamed,unnamed,unnamed,unnamed,unnamed,unnamed,unnamed,unnamed,unnamed,unnamed,unnamed,unnamed,unnamed,unnamed,unnamed,unnamed,unnamed,unnamed,unnamed,unnamed,unnamed,unnamed,unnamed,unnamed,unnamed,unnamed,unnamed,unnamed,unnamed,unnamed,unnamed,unnamed,unnamed,unnamed,unnamed,unnamed,unnamed,unnamed…	ARNTL,BTBD6,C18orf25,CACUL1,CNOT6L,CTIF,CUL5,CUL9,DFFA,DNASE1L1,EIF4G1,FAF1,FBXL18,FBXO10,HACE1,KLHL8,LONP1,PMAIP1,PPP2R2A,PPP2R5C,RAB12,RLIM,RNPS1,RPL10A,RPL11,RPL12,RPL13,RPL15,RPL17,RPL18,RPL19,RPL23,RPL23A,RPL24,RPL26,RPL29,RPL3,RPL31,RPL32,RPL34,RPL35,RPL35A,RPL36,RPL36A,RPL37,RPL37A,RPL39,RPL41,RPL5,RPL6,RPL7,RPL7A,RPL8,RPL9,RPS10,RPS14,RPS15,RPS15A,RPS17,RPS17L,RPS2,RPS24,RPS3,RPS3A,RPS4X,…
GO Biological Process	GO:0009057	macromolecule catabolic process	47	1.40704e-10	1.8155e-06	3.86278e-08	2.13646	37.4451	80	0.0748903	0.16	49	1.57693e-13	2.03471e-09	4.15246e-11	2.3881	34.337	82	989	0.127329	0.082912	unnamed,unnamed,unnamed,unnamed,unnamed,unnamed,unnamed,unnamed,unnamed,unnamed,unnamed,unnamed,unnamed,unnamed,unnamed,unnamed,unnamed,unnamed,unnamed,unnamed,unnamed,unnamed,unnamed,unnamed,unnamed,unnamed,unnamed,unnamed,unnamed,unnamed,unnamed,unnamed,unnamed,unnamed,unnamed,unnamed,unnamed,unnamed,unnamed,unnamed,unnamed,unnamed,unnamed,unnamed,unnamed,unnamed,unnamed,unnamed,unnamed,unnamed…	ARNTL,BRSK2,BTBD6,C18orf25,CACUL1,CNOT6L,CSPG5,CTIF,CUL5,CUL9,DFFA,DNASE1L1,EIF4G1,FAF1,FBXL18,FBXO10,HACE1,KLHL8,LONP1,LRSAM1,PHKA2,PMAIP1,PPP2R2A,PPP2R5C,PYGL,RAB12,RHBDD1,RLIM,RNPS1,RPL10A,RPL11,RPL12,RPL13,RPL15,RPL17,RPL18,RPL19,RPL23,RPL23A,RPL24,RPL26,RPL29,RPL3,RPL31,RPL32,RPL34,RPL35,RPL35A,RPL36,RPL36A,RPL37,RPL37A,RPL39,RPL41,RPL5,RPL6,RPL7,RPL7A,RPL8,RPL9,RPS10,RPS14,RPS15,RPS15A,RPS1…
GO Biological Process	GO:0042255	ribosome assembly	48	2.11845e-09	2.73343e-05	5.69465e-07	8.56294	1.63495	14	0.0032699	0.028	51	2.49282e-08	0.000321649	6.30684e-06	6.40062	2.18729	14	63	0.0217391	0.222222	unnamed,unnamed,unnamed,unnamed,unnamed,unnamed,unnamed,unnamed,unnamed,unnamed,unnamed,unnamed,unnamed,unnamed	DDX3X,NPM1,RPL11,RPL12,RPL23A,RPL24,RPL3,RPL5,RPL6,RPS10,RPS14,RPS15,RPS17,RPS17L
GO Biological Process	GO:1902580	single-organism cellular localization	49	2.35525e-09	3.03898e-05	6.20199e-07	1.99744	40.5518	81	0.0811037	0.162	42	5.77671e-17	7.45369e-13	1.77469e-14	2.72592	30.4484	83	877	0.128882	0.0946408	unnamed,unnamed,unnamed,unnamed,unnamed,unnamed,unnamed,unnamed,unnamed,unnamed,unnamed,unnamed,unnamed,unnamed,unnamed,unnamed,unnamed,unnamed,unnamed,unnamed,unnamed,unnamed,unnamed,unnamed,unnamed,unnamed,unnamed,unnamed,unnamed,unnamed,unnamed,unnamed,unnamed,unnamed,unnamed,unnamed,unnamed,unnamed,unnamed,unnamed,unnamed,unnamed,unnamed,unnamed,unnamed,unnamed,unnamed,unnamed,unnamed,unnamed…	ANK1,AP3B1,ARL3,ARNTL,BICD1,BTK,CLASP1,DYNC1H1,DYNC1I1,DYNLT1,EXOC4,HSPA4,IPO9,KPNA2,NPM1,NUP155,NUP205,NUSAP1,PAX6,PEX14,PMAIP1,POM121C,PPP3CA,RAB34,RANBP6,RILPL1,RPL10A,RPL11,RPL12,RPL13,RPL15,RPL17,RPL18,RPL19,RPL23,RPL23A,RPL24,RPL26,RPL29,RPL3,RPL31,RPL32,RPL34,RPL35,RPL35A,RPL36,RPL36A,RPL37,RPL37A,RPL39,RPL41,RPL5,RPL6,RPL7,RPL7A,RPL8,RPL9,RPS10,RPS14,RPS15,RPS15A,RPS17,RPS17L,RPS2,RPS24,R…
GO Biological Process	GO:0042273	ribosomal large subunit biogenesis	50	2.72409e-09	3.51489e-05	7.02979e-07	7.60975	1.97115	15	0.00394231	0.03	50	2.00886e-09	2.59204e-05	5.18407e-07	6.49077	2.46504	16	71	0.0248447	0.225352	unnamed,unnamed,unnamed,unnamed,unnamed,unnamed,unnamed,unnamed,unnamed,unnamed,unnamed,unnamed,unnamed,unnamed,unnamed	ENSG00000263809,NPM1,RPL10A,RPL11,RPL12,RPL23A,RPL24,RPL26,RPL3,RPL35,RPL35A,RPL5,RPL6,RPL7,RPL7A,RPL7L1
GO Biological Process	GO:0044802	single-organism membrane organization	51	8.64173e-09	0.000111504	2.18636e-06	2.01752	36.6787	74	0.0733575	0.148	47	7.8523e-15	1.01318e-10	2.15571e-12	2.66036	28.1917	75	812	0.11646	0.0923645	unnamed,unnamed,unnamed,unnamed,unnamed,unnamed,unnamed,unnamed,unnamed,unnamed,unnamed,unnamed,unnamed,unnamed,unnamed,unnamed,unnamed,unnamed,unnamed,unnamed,unnamed,unnamed,unnamed,unnamed,unnamed,unnamed,unnamed,unnamed,unnamed,unnamed,unnamed,unnamed,unnamed,unnamed,unnamed,unnamed,unnamed,unnamed,unnamed,unnamed,unnamed,unnamed,unnamed,unnamed,unnamed,unnamed,unnamed,unnamed,unnamed,unnamed…	ANK1,ATP10D,C11orf83,DYNLT1,EXOC4,HSPA4,NUP155,NUP205,PMAIP1,POM121C,PPP2R2A,RAB34,RAB39A,RILPL1,RPL10A,RPL11,RPL12,RPL13,RPL15,RPL17,RPL18,RPL19,RPL23,RPL23A,RPL24,RPL26,RPL29,RPL3,RPL31,RPL32,RPL34,RPL35,RPL35A,RPL36,RPL36A,RPL37,RPL37A,RPL39,RPL41,RPL5,RPL6,RPL7,RPL7A,RPL8,RPL9,RPS10,RPS14,RPS15,RPS15A,RPS17,RPS17L,RPS2,RPS24,RPS3,RPS3A,RPS4X,RPS4Y1,RPS6,RPS7,RPS8,RTN4,SPTBN1,SYT15,SYT3,SYT4,S…
GO Biological Process	GO:0042274	ribosomal small subunit biogenesis	52	1.29478e-06	0.0167066	0.00032128	5.97654	2.00785	12	0.0040157	0.024	54	2.36982e-05	0.305778	0.00566255	4.59175	2.3956	11	69	0.0170807	0.15942	unnamed,unnamed,unnamed,unnamed,unnamed,unnamed,unnamed,unnamed,unnamed,unnamed,unnamed,unnamed	NPM1,RIOK2,RPS10,RPS14,RPS15,RPS17,RPS17L,RPS24,RPS6,RPS7,RPS8
GO Biological Process	GO:0022618	ribonucleoprotein complex assembly	53	1.78454e-06	0.0230259	0.00043445	3.18231	7.22745	23	0.0144549	0.046	52	5.01285e-07	0.00646809	0.000124386	3.31232	6.94377	23	200	0.0357143	0.115	unnamed,unnamed,unnamed,unnamed,unnamed,unnamed,unnamed,unnamed,unnamed,unnamed,unnamed,unnamed,unnamed,unnamed,unnamed,unnamed,unnamed,unnamed,unnamed,unnamed,unnamed,unnamed,unnamed	BICD1,DDX3X,DYNC1H1,EIF3D,EIF4H,GRB7,NPM1,PRPF39,RPL11,RPL12,RPL23A,RPL24,RPL3,RPL5,RPL6,RPS10,RPS14,RPS15,RPS17,RPS17L,SNRPB,TGS1,USP39
GO Biological Process	GO:0071826	ribonucleoprotein complex subunit organization	54	3.54694e-06	0.0457662	0.000847522	3.0507	7.53927	23	0.0150785	0.046	53	1.40046e-06	0.0180701	0.000340946	3.12483	7.3604	23	212	0.0357143	0.108491	unnamed,unnamed,unnamed,unnamed,unnamed,unnamed,unnamed,unnamed,unnamed,unnamed,unnamed,unnamed,unnamed,unnamed,unnamed,unnamed,unnamed,unnamed,unnamed,unnamed,unnamed,unnamed,unnamed	BICD1,DDX3X,DYNC1H1,EIF3D,EIF4H,GRB7,NPM1,PRPF39,RPL11,RPL12,RPL23A,RPL24,RPL3,RPL5,RPL6,RPS10,RPS14,RPS15,RPS17,RPS17L,SNRPB,TGS1,USP39
