# Supplementary material for: MYCN drives oncogenesis by cooperating with the histone methyltransferase G9a and the WDR5 adaptor to orchestrate global gene transcription
Source: PLoS Biol. 2024 Mar 28;22(3):e3002240. doi: 10.1371/journal.pbio.3002240 (PMC11003700; doi:10.1371/journal.pbio.3002240)
Supplement: S11 Table — (XLSX) [file pbio.3002240.s018.xlsx]

## Sheet: GOBP_AXON_DEVELOPMENT
Table S11. Gene sets regulated by MYCN derived from GSEA of MYCN regulated transcriptome.
GOBP_AXON_DEVELOPMENT
NAME	SYMBOL	RANK IN GENE LIST	RANK METRIC SCORE	RUNNING ES	CORE ENRICHMENT
row_0	NCAM1	3	80.0427	0.034081	Yes
row_1	NRP1	9	54.4131	0.0570969	Yes
row_2	NREP	13	50.8319	0.078684	Yes
row_3	RET	20	44.0766	0.0972273	Yes
row_4	PLXNC1	25	38.64	0.113548	Yes
row_5	ATP8A2	28	37.2394	0.129373	Yes
row_6	UNC5C	36	34.3749	0.143715	Yes
row_7	CHL1	37	34.2355	0.158359	Yes
row_8	GAP43	45	32.2467	0.171791	Yes
row_9	CTNNA2	46	31.9878	0.185472	Yes
row_10	CNR1	57	27.908	0.196894	Yes
row_11	TTL	63	26.8143	0.208106	Yes
row_12	MAP1B	66	26.5124	0.219342	Yes
row_13	INPP5F	71	25.7858	0.230165	Yes
row_14	CNTN1	78	24.9275	0.240518	Yes
row_15	DCC	85	24.4232	0.250656	Yes
row_16	KIF13B	139	19.7291	0.256366	Yes
row_17	STMN1	140	19.7127	0.264797	Yes
row_18	ISL1	141	19.6228	0.27319	Yes
row_19	MAP6	146	19.2749	0.281228	Yes
row_20	DRAXIN	158	18.436	0.288548	Yes
row_21	NCAM2	164	18.3083	0.296121	Yes
row_22	KALRN	168	18.175	0.30374	Yes
row_23	MAPT	199	16.8608	0.309407	Yes
row_24	TRIO	206	16.6398	0.316216	Yes
row_25	RUFY3	229	15.9347	0.321899	Yes
row_26	CNTN5	244	15.4924	0.327804	Yes
row_27	ANK3	249	15.412	0.33419	Yes
row_28	APP	267	14.9967	0.33973	Yes
row_29	ADARB1	271	14.9113	0.345953	Yes
row_30	CASP3	276	14.8471	0.352097	Yes
row_31	GATA3	281	14.7294	0.358191	Yes
row_32	RTN4	286	14.6482	0.364251	Yes
row_33	JUN	297	14.2541	0.369833	Yes
row_34	EIF4G2	305	14.059	0.375485	Yes
row_35	PAFAH1B1	316	13.8546	0.380896	Yes
row_36	PAK3	341	13.5668	0.385464	Yes
row_37	KIF5A	362	13.0638	0.390022	Yes
row_38	KIF5C	370	12.9109	0.395184	Yes
row_39	BCL2	420	12.1862	0.397873	Yes
row_40	KLF7	425	12.1486	0.402864	Yes
row_41	DPYSL2	441	11.908	0.407185	Yes
row_42	PTPRO	499	11.1676	0.409027	Yes
row_43	PSEN1	506	11.1187	0.413474	Yes
row_44	TUBB2B	514	11.0573	0.417843	Yes
row_45	NRXN1	528	10.9169	0.421843	Yes
row_46	MAP3K13	553	10.7055	0.425186	Yes
row_47	CDH2	557	10.6771	0.429599	Yes
row_48	ATL1	559	10.6482	0.434102	Yes
row_49	PALLD	576	10.5343	0.437784	Yes
row_50	NEO1	603	10.2801	0.440842	Yes
row_51	S100B	606	10.2492	0.445123	Yes
row_52	CNTN2	627	10.0743	0.448402	Yes
row_53	PLXNA2	643	9.97004	0.451895	Yes
row_54	PLPPR4	645	9.96386	0.456105	Yes
row_55	L1CAM	650	9.92449	0.460144	Yes
row_56	APLP2	670	9.77383	0.463346	Yes
row_57	PLXNA4	672	9.76285	0.46747	Yes
row_58	RNF165	706	9.51039	0.469839	Yes
row_59	SPG11	762	9.1462	0.47092	Yes
row_60	PTCH1	766	9.10656	0.474661	Yes
row_61	ETV1	777	9.02062	0.478004	Yes
row_62	LAMA5	818	8.75222	0.479688	Yes
row_63	SLC9A6	823	8.7196	0.483212	Yes
row_64	GSK3B	826	8.70375	0.486832	Yes
row_65	CDH11	828	8.69176	0.490498	Yes
row_66	ALS2	850	8.55189	0.493075	Yes
row_67	DOCK7	890	8.39269	0.494657	Yes
row_68	RAPH1	892	8.39186	0.498194	Yes
row_69	SVBP	944	8.11276	0.499039	Yes
row_70	USP9X	974	7.94055	0.500942	Yes
row_71	ADCY1	976	7.93529	0.504285	Yes
row_72	PHOX2B	993	7.81823	0.506805	Yes
row_73	BMPR2	998	7.80128	0.509936	Yes
row_74	CTNNA1	999	7.80004	0.513272	Yes
row_75	SPRY3	1035	7.65403	0.514744	Yes
row_76	NFIB	1041	7.63342	0.517752	Yes
row_77	STXBP1	1093	7.37845	0.518282	Yes
row_78	ACTB	1105	7.31575	0.520845	Yes
row_79	OPHN1	1136	7.21359	0.522386	Yes
row_80	EFNA5	1154	7.15001	0.524569	Yes
row_81	RND2	1186	7.04355	0.525986	Yes
row_82	BRSK1	1192	7.021	0.528732	Yes
row_83	EXT1	1205	6.97496	0.531097	Yes
row_84	SLIT3	1208	6.95824	0.533971	Yes
row_85	RELN	1209	6.95604	0.536946	Yes
row_86	PTPRM	1263	6.78663	0.53712	Yes
row_87	S100A6	1274	6.71701	0.539478	Yes
row_88	EFNB3	1297	6.66021	0.541195	Yes
row_89	NRCAM	1307	6.63449	0.543569	Yes
row_90	ARHGAP35	1311	6.61937	0.546246	Yes
row_91	NFASC	1377	6.41447	0.545643	Yes
row_92	MAP2	1440	6.28083	0.545138	Yes
row_93	SEMA6D	1489	6.15586	0.5453	Yes
row_94	MAP1A	1553	5.97142	0.544611	Yes
row_95	WNT3	1567	5.94299	0.546484	Yes
row_96	TCTN1	1579	5.9169	0.548448	Yes
row_97	CAMSAP2	1584	5.89893	0.550765	Yes
row_98	GDI1	1587	5.88049	0.553178	Yes
row_99	FKBP1B	1603	5.8244	0.554897	Yes
row_100	APLP1	1665	5.69382	0.554192	Yes
row_101	EFNA2	1682	5.64706	0.555783	Yes
row_102	PPP3CB	1695	5.62203	0.55757	Yes
row_103	TNR	1710	5.58795	0.55924	Yes
row_104	SIAH1	1754	5.48964	0.559374	Yes
row_105	DAG1	1796	5.39614	0.559572	Yes
row_106	SEMA4F	1801	5.38614	0.561669	Yes
row_107	FYN	1821	5.34353	0.562977	Yes
row_108	CDK5R2	1896	5.21396	0.561398	Yes
row_109	NTNG1	1898	5.20795	0.563574	Yes
row_110	JAK2	1955	5.11185	0.562877	Yes
row_111	SEMA6C	1964	5.0978	0.564646	Yes
row_112	ECE1	2003	5.02265	0.564838	Yes
row_113	KREMEN1	2061	4.91573	0.564006	Yes
row_114	FLOT1	2065	4.91149	0.565953	Yes
row_115	RAC1	2114	4.84099	0.565552	Yes
row_116	ROBO2	2123	4.81727	0.567201	Yes
row_117	SLITRK3	2126	4.81341	0.569157	Yes
row_118	NLGN3	2217	4.66247	0.566518	Yes
row_119	MYCBP2	2283	4.56945	0.565126	Yes
row_120	TIAM1	2342	4.49035	0.564061	Yes
row_121	EPHB2	2386	4.43086	0.563743	Yes
row_122	OLFM1	2392	4.40775	0.565371	Yes
row_123	EPHB6	2431	4.3536	0.565277	Yes
row_124	HDAC6	2493	4.28546	0.56397	Yes
row_125	SHTN1	2526	4.23766	0.564135	Yes
row_126	PTN	2527	4.23741	0.565947	Yes
row_127	SEMA4G	2544	4.22017	0.566929	Yes
row_128	DDR1	2562	4.20012	0.56785	Yes
row_129	ITGB1	2573	4.1883	0.569127	Yes
row_130	CRMP1	2655	4.10462	0.566712	Yes
row_131	ISLR2	2698	4.04683	0.566281	Yes
row_132	RAB3A	2711	4.03781	0.567391	Yes
row_133	CDK5R1	2724	4.01809	0.568491	Yes
row_134	MEGF8	2815	3.90784	0.56553	Yes
row_135	NDN	2868	3.84633	0.564498	Yes
row_136	DBN1	2869	3.84302	0.566142	Yes
row_137	APBB1	2874	3.83855	0.567578	Yes
row_138	TIAM2	2880	3.83148	0.568959	Yes
row_139	FLRT3	2890	3.82597	0.570132	Yes
row_140	FSTL4	2899	3.82072	0.571355	Yes
row_141	PLP1	2974	3.74714	0.569148	Yes
row_142	CNP	3023	3.70985	0.568264	Yes
row_143	CRABP2	3032	3.70335	0.569436	Yes
row_144	PAK2	3054	3.68521	0.569931	Yes
row_145	PICALM	3060	3.68272	0.571249	Yes
row_146	SEMA3F	3061	3.68193	0.572824	Yes
row_147	SLIT2	3083	3.66503	0.57331	Yes
row_148	DHFR	3101	3.64831	0.573996	Yes
row_149	PLXNA3	3147	3.60639	0.573222	Yes
row_150	PTPRF	3160	3.59513	0.574142	Yes
row_151	DCLK1	3166	3.587	0.575419	Yes
row_152	ADNP	3170	3.58378	0.576797	Yes
row_153	THY1	3183	3.57193	0.577707	Yes

## Sheet: GOBP_CELL_MORPHOGENESIS_INVOLVE
GOBP_CELL_MORPHOGENESIS_INVOLVED_IN_NEURON_DIFFERENTIATION
NAME	SYMBOL	RANK IN GENE LIST	RANK METRIC SCORE	RUNNING ES	CORE ENRICHMENT
row_0	NCAM1	3	80.0427	0.0314804	Yes
row_1	NRP1	9	54.4131	0.0527278	Yes
row_2	RET	20	44.0766	0.0696316	Yes
row_3	PLXNC1	25	38.64	0.0846966	Yes
row_4	ATP8A2	28	37.2394	0.0993115	Yes
row_5	UNC5C	36	34.3749	0.112536	Yes
row_6	CHL1	37	34.2355	0.126067	Yes
row_7	GAP43	45	32.2467	0.13845	Yes
row_8	CTNNA2	46	31.9878	0.151093	Yes
row_9	KIDINS220	58	27.2634	0.1613	Yes
row_10	TTL	63	26.8143	0.171691	Yes
row_11	MAP1B	66	26.5124	0.182066	Yes
row_12	CNTN1	78	24.9275	0.19135	Yes
row_13	DCC	85	24.4232	0.200693	Yes
row_14	CHRNA3	98	23.1218	0.209211	Yes
row_15	KIF13B	139	19.7291	0.214942	Yes
row_16	STMN1	140	19.7127	0.222733	Yes
row_17	ISL1	141	19.6228	0.230488	Yes
row_18	MAP6	146	19.2749	0.2379	Yes
row_19	DRAXIN	158	18.436	0.244618	Yes
row_20	KALRN	168	18.175	0.251336	Yes
row_21	MAPT	199	16.8608	0.25645	Yes
row_22	TRIO	206	16.6398	0.262717	Yes
row_23	YWHAH	222	16.2419	0.268361	Yes
row_24	RUFY3	229	15.9347	0.274349	Yes
row_25	NEDD4L	236	15.731	0.280256	Yes
row_26	CNTN5	244	15.4924	0.286018	Yes
row_27	ANK3	249	15.412	0.291902	Yes
row_28	CDC42	261	15.1086	0.297305	Yes
row_29	APP	267	14.9967	0.302974	Yes
row_30	ADARB1	271	14.9113	0.308712	Yes
row_31	GATA3	281	14.7294	0.314069	Yes
row_32	RTN4	286	14.6482	0.319652	Yes
row_33	EIF4G2	305	14.059	0.324278	Yes
row_34	PAFAH1B1	316	13.8546	0.329237	Yes
row_35	PAK3	341	13.5668	0.333359	Yes
row_36	KIF5A	362	13.0638	0.337489	Yes
row_37	KIF5C	370	12.9109	0.34223	Yes
row_38	DNM3	406	12.3997	0.345323	Yes
row_39	BCL2	420	12.1862	0.349467	Yes
row_40	KLF7	425	12.1486	0.354062	Yes
row_41	DPYSL2	441	11.908	0.357993	Yes
row_42	SRCIN1	445	11.8401	0.362518	Yes
row_43	RBFOX2	489	11.3636	0.364788	Yes
row_44	FARP1	490	11.3204	0.369262	Yes
row_45	PTPRO	499	11.1676	0.373262	Yes
row_46	PSEN1	506	11.1187	0.377347	Yes
row_47	TUBB2B	514	11.0573	0.381355	Yes
row_48	ZDHHC15	521	10.9856	0.385387	Yes
row_49	NRXN1	528	10.9169	0.389392	Yes
row_50	MAP3K13	553	10.7055	0.392383	Yes
row_51	CDH2	557	10.6771	0.396448	Yes
row_52	ATL1	559	10.6482	0.400604	Yes
row_53	RAPGEF2	561	10.6323	0.404755	Yes
row_54	PALLD	576	10.5343	0.408195	Yes
row_55	NEO1	603	10.2801	0.410915	Yes
row_56	S100B	606	10.2492	0.414862	Yes
row_57	CNTN2	627	10.0743	0.417811	Yes
row_58	PLXNA2	643	9.97004	0.420976	Yes
row_59	PLPPR4	645	9.96386	0.424862	Yes
row_60	L1CAM	650	9.92449	0.428578	Yes
row_61	APLP2	670	9.77383	0.431459	Yes
row_62	PLXNA4	672	9.76285	0.435266	Yes
row_63	SULT4A1	699	9.57731	0.437708	Yes
row_64	RNF165	706	9.51039	0.441157	Yes
row_65	SPG11	762	9.1462	0.44193	Yes
row_66	PTCH1	766	9.10656	0.445374	Yes
row_67	ETV1	777	9.02062	0.448423	Yes
row_68	LAMA5	818	8.75222	0.449815	Yes
row_69	SLC9A6	823	8.7196	0.453055	Yes
row_70	GSK3B	826	8.70375	0.456391	Yes
row_71	CDH11	828	8.69176	0.459775	Yes
row_72	ALS2	850	8.55189	0.46207	Yes
row_73	DOCK7	890	8.39269	0.463372	Yes
row_74	RAPH1	892	8.39186	0.466637	Yes
row_75	CUX1	965	7.99919	0.466078	Yes
row_76	USP9X	974	7.94055	0.468803	Yes
row_77	ADCY1	976	7.93529	0.471888	Yes
row_78	PHOX2B	993	7.81823	0.474151	Yes
row_79	BMPR2	998	7.80128	0.477028	Yes
row_80	LZTS3	1015	7.73888	0.47926	Yes
row_81	ABI2	1032	7.68146	0.481469	Yes
row_82	NFIB	1041	7.63342	0.484073	Yes
row_83	PARP6	1084	7.43325	0.48484	Yes
row_84	STXBP1	1093	7.37845	0.487343	Yes
row_85	ACTB	1105	7.31575	0.489666	Yes
row_86	OPHN1	1136	7.21359	0.490967	Yes
row_87	EFNA5	1154	7.15001	0.492915	Yes
row_88	RND2	1186	7.04355	0.494097	Yes
row_89	BRSK1	1192	7.021	0.496613	Yes
row_90	EXT1	1205	6.97496	0.49875	Yes
row_91	SLIT3	1208	6.95824	0.501397	Yes
row_92	RELN	1209	6.95604	0.504146	Yes
row_93	PTPRM	1263	6.78663	0.50409	Yes
row_94	S100A6	1274	6.71701	0.506228	Yes
row_95	EFNB3	1297	6.66021	0.507724	Yes
row_96	NRCAM	1307	6.63449	0.509881	Yes
row_97	ARHGAP35	1311	6.61937	0.512342	Yes
row_98	NFASC	1377	6.41447	0.511519	Yes
row_99	CTNND2	1405	6.34752	0.512633	Yes
row_100	MAP2	1440	6.28083	0.513358	Yes
row_101	SDC2	1462	6.20498	0.514725	Yes
row_102	SEMA6D	1489	6.15586	0.515815	Yes
row_103	PHACTR1	1552	5.97382	0.514973	Yes
row_104	MAP1A	1553	5.97142	0.517333	Yes
row_105	WNT3	1567	5.94299	0.51901	Yes
row_106	TCTN1	1579	5.9169	0.52078	Yes
row_107	HECW2	1583	5.90026	0.522957	Yes
row_108	GDI1	1587	5.88049	0.525126	Yes
row_109	ELAVL4	1608	5.8093	0.526389	Yes
row_110	APLP1	1665	5.69382	0.525746	Yes
row_111	EFNA2	1682	5.64706	0.527151	Yes
row_112	PPP3CB	1695	5.62203	0.528753	Yes
row_113	TNR	1710	5.58795	0.530238	Yes
row_114	ARMCX5-GPRASP2	1745	5.51997	0.530663	Yes
row_115	BHLHB9	1752	5.50297	0.532528	Yes
row_116	SIAH1	1754	5.48964	0.534646	Yes
row_117	DAG1	1796	5.39614	0.53466	Yes
row_118	SEMA4F	1801	5.38614	0.536582	Yes
row_119	FYN	1821	5.34353	0.537713	Yes
row_120	CDK5R2	1896	5.21396	0.53595	Yes
row_121	NTNG1	1898	5.20795	0.537956	Yes
row_122	SEMA6C	1964	5.0978	0.536613	Yes
row_123	PPFIA2	1977	5.07515	0.537999	Yes
row_124	ECE1	2003	5.02265	0.538692	Yes
row_125	FLOT1	2065	4.91149	0.537481	Yes
row_126	RAC1	2114	4.84099	0.536915	Yes
row_127	ROBO2	2123	4.81727	0.538405	Yes
row_128	SLITRK3	2126	4.81341	0.540204	Yes
row_129	NLGN3	2217	4.66247	0.537397	Yes
row_130	MYCBP2	2283	4.56945	0.535844	Yes
row_131	STAU2	2297	4.54125	0.536967	Yes
row_132	TIAM1	2342	4.49035	0.536469	Yes
row_133	LZTS1	2344	4.48798	0.538191	Yes
row_134	EPHB2	2386	4.43086	0.537824	Yes
row_135	OLFM1	2392	4.40775	0.539307	Yes
row_136	CUX2	2394	4.40121	0.540995	Yes
row_137	EPHB6	2431	4.3536	0.540856	Yes
row_138	HDAC6	2493	4.28546	0.539398	Yes
row_139	SHTN1	2526	4.23766	0.539419	Yes
row_140	PTN	2527	4.23741	0.541094	Yes
row_141	SEMA4G	2544	4.22017	0.541935	Yes
row_142	ITGB1	2573	4.1883	0.542144	Yes
row_143	HECW1	2627	4.14111	0.541042	Yes
row_144	CRMP1	2655	4.10462	0.541269	Yes
row_145	ISLR2	2698	4.04683	0.540699	Yes
row_146	RAB3A	2711	4.03781	0.541674	Yes
row_147	CDK5R1	2724	4.01809	0.542643	Yes
row_148	MEGF8	2815	3.90784	0.539537	Yes
row_149	NDN	2868	3.84633	0.53837	Yes
row_150	DBN1	2869	3.84302	0.539889	Yes
row_151	MEF2A	2873	3.83864	0.541251	Yes
row_152	APBB1	2874	3.83855	0.542768	Yes
row_153	TIAM2	2880	3.83148	0.544024	Yes
row_154	FLRT3	2890	3.82597	0.545072	Yes
row_155	FSTL4	2899	3.82072	0.546168	Yes
row_156	CNP	3023	3.70985	0.541279	Yes
row_157	CRABP2	3032	3.70335	0.54233	Yes
row_158	PAK2	3054	3.68521	0.542701	Yes
row_159	PICALM	3060	3.68272	0.543898	Yes
row_160	SEMA3F	3061	3.68193	0.545353	Yes
row_161	SLIT2	3083	3.66503	0.545717	Yes
row_162	KIF1A	3117	3.63712	0.545449	Yes
row_163	PLXNA3	3147	3.60639	0.545376	Yes
row_164	DCLK1	3166	3.587	0.545864	Yes
row_165	ADNP	3170	3.58378	0.547125	Yes
row_166	THY1	3183	3.57193	0.547917	Yes
row_167	NEDD4	3217	3.53645	0.54761	Yes
row_168	PAK1	3231	3.52612	0.548332	Yes

## Sheet: GOBP_CYTOPLASMIC_TRANSLATION
GOBP_CYTOPLASMIC_TRANSLATION
NAME	SYMBOL	RANK IN GENE LIST	RANK METRIC SCORE	RUNNING ES	CORE ENRICHMENT
row_63	RPL8	17361	-3.07319	-0.723295	Yes
row_64	DNAJC24	17375	-3.1002	-0.720047	Yes
row_65	DPH6	17393	-3.1224	-0.716974	Yes
row_66	DHX29	17401	-3.13198	-0.71338	Yes
row_67	RPL18	17524	-3.29986	-0.715418	Yes
row_68	RPS11	17596	-3.4109	-0.714725	Yes
row_69	RPL39	17654	-3.50577	-0.713201	Yes
row_70	RPL36	17838	-3.77975	-0.717733	Yes
row_71	EIF2D	17870	-3.83839	-0.714468	Yes
row_72	RPL10A	17876	-3.85077	-0.709867	Yes
row_73	EIF4G1	17880	-3.85786	-0.705156	Yes
row_74	EIF4A1	17887	-3.86663	-0.700585	Yes
row_75	RPS8	17909	-3.89958	-0.696735	Yes
row_76	RPL35	17940	-3.93785	-0.693294	Yes
row_77	EIF3I	18037	-4.11521	-0.692983	Yes
row_78	RPL4	18142	-4.30318	-0.692842	Yes
row_79	RPS23	18181	-4.38819	-0.68924	Yes
row_80	RPL3	18244	-4.50343	-0.686712	Yes
row_81	RPL26L1	18285	-4.58656	-0.682961	Yes
row_82	RPL41	18339	-4.76035	-0.679652	Yes
row_83	RPS15A	18355	-4.77573	-0.674392	Yes
row_84	RPL24	18364	-4.79314	-0.668755	Yes
row_85	RPL37A	18415	-4.88905	-0.665131	Yes
row_86	RPL13	18438	-4.96362	-0.659991	Yes
row_87	RPL23A	18503	-5.14814	-0.656751	Yes
row_88	RPS4X	18516	-5.16765	-0.650845	Yes
row_89	RPL29	18520	-5.17665	-0.644471	Yes
row_90	EIF2B3	18543	-5.25477	-0.638963	Yes
row_91	RPS24	18548	-5.267	-0.632525	Yes
row_92	RPL37	18622	-5.47736	-0.629328	Yes
row_93	EIF3D	18631	-5.50739	-0.622791	Yes
row_94	RPL38	18650	-5.59173	-0.616655	Yes
row_95	RPS3	18662	-5.6305	-0.610115	Yes
row_96	RPS27A	18666	-5.64394	-0.603151	Yes
row_97	EIF2S3	18721	-5.82842	-0.598546	Yes
row_98	RPS25	18729	-5.8503	-0.591525	Yes
row_99	RPS17	18761	-5.95864	-0.585587	Yes
row_100	ZC3H15	18768	-5.98849	-0.578341	Yes
row_101	RPL7A	18812	-6.21963	-0.572684	Yes
row_102	RPL27	18828	-6.26953	-0.565541	Yes
row_103	RPL35A	18840	-6.31496	-0.558138	Yes
row_104	RPS2	18842	-6.31838	-0.550222	Yes
row_105	SYNCRIP	18857	-6.36926	-0.542903	Yes
row_106	RPL6	18894	-6.50991	-0.536524	Yes
row_107	CSDE1	18901	-6.53735	-0.528586	Yes
row_108	RPS10	18905	-6.55562	-0.520473	Yes
row_109	YBX1	18919	-6.61981	-0.512787	Yes
row_110	RPS14	18980	-6.86674	-0.507177	Yes
row_111	IGF2BP1	18987	-6.89767	-0.498785	Yes
row_112	RPS7	18991	-6.90648	-0.49023	Yes
row_113	RPL7	19002	-6.97266	-0.481946	Yes
row_114	HNRNPU	19049	-7.18851	-0.47522	Yes
row_115	RPL14	19061	-7.28538	-0.466593	Yes
row_116	RPL11	19142	-7.82039	-0.460797	Yes
row_117	RPL31	19150	-7.90712	-0.451183	Yes
row_118	RPL32	19248	-8.51214	-0.445379	Yes
row_119	RPL22	19283	-8.86651	-0.435927	Yes
row_120	CNBP	19299	-8.97829	-0.425369	Yes
row_121	RPS6	19322	-9.17772	-0.414915	Yes
row_122	YBX3	19377	-9.7221	-0.405401	Yes
row_123	HNRNPD	19387	-9.80176	-0.393499	Yes
row_124	RPS18	19406	-10.0118	-0.381791	Yes
row_125	RPL12	19459	-10.7054	-0.370935	Yes
row_126	DPH2	19487	-11.0856	-0.358329	Yes
row_127	RPS3A	19498	-11.2405	-0.344665	Yes
row_128	RPL34	19501	-11.2623	-0.330566	Yes
row_129	RPL9	19524	-11.64	-0.317008	Yes
row_130	EIF2S2	19536	-11.843	-0.302634	Yes
row_131	DPH5	19543	-11.9203	-0.28791	Yes
row_132	RPL17	19557	-12.2266	-0.273154	Yes
row_133	RPL36A	19559	-12.2645	-0.257741	Yes
row_134	RPL23	19566	-12.4405	-0.24236	Yes
row_135	EIF4B	19579	-12.7281	-0.226922	Yes
row_136	RPL22L1	19582	-12.8051	-0.210878	Yes
row_137	RPL26	19637	-14.3729	-0.1955	Yes
row_138	ETF1	19666	-15.4126	-0.177489	Yes
row_139	GSPT1	19678	-15.7135	-0.158236	Yes
row_140	EIF3M	19735	-19.5752	-0.1364	Yes
row_141	RPL5	19764	-22.6145	-0.109309	Yes
row_142	PABPC1	19775	-24.0167	-0.0795356	Yes
row_143	EIF3A	19792	-26.7213	-0.046657	Yes
row_144	RPL15	19817	-38.3341	0.000457148	Yes

## Sheet: GOBP_NCRNA_PROCESSING
GOBP_NCRNA_PROCESSING
NAME	SYMBOL	RANK IN GENE LIST	RANK METRIC SCORE	RUNNING ES	CORE ENRICHMENT
row_191	PUS3	17164	-2.82153	-0.697515	Yes
row_192	MPHOSPH10	17167	-2.82244	-0.696101	Yes
row_193	PUS1	17178	-2.83801	-0.69509	Yes
row_194	DDX56	17189	-2.8419	-0.694076	Yes
row_195	EXOSC2	17200	-2.85388	-0.693056	Yes
row_196	FTSJ3	17207	-2.86725	-0.691823	Yes
row_197	BYSL	17208	-2.8697	-0.690281	Yes
row_198	TRMT61A	17256	-2.94247	-0.691115	Yes
row_199	TRMT10C	17258	-2.94396	-0.689584	Yes
row_200	MRM3	17260	-2.94636	-0.688052	Yes
row_201	DUS3L	17277	-2.96861	-0.687278	Yes
row_202	TRMT10A	17319	-3.01975	-0.687763	Yes
row_203	EXOSC9	17326	-3.02863	-0.686443	Yes
row_204	PES1	17359	-3.06726	-0.686439	Yes
row_205	TRIT1	17377	-3.10089	-0.685647	Yes
row_206	DHX37	17383	-3.10441	-0.684235	Yes
row_207	KTI12	17384	-3.10612	-0.682565	Yes
row_208	POP4	17461	-3.2114	-0.684746	Yes
row_209	NGDN	17528	-3.30651	-0.686361	Yes
row_210	METTL5	17541	-3.31832	-0.685194	Yes
row_211	CDK5RAP1	17562	-3.34985	-0.684422	Yes
row_212	IMP3	17575	-3.36828	-0.683228	Yes
row_213	THUMPD1	17585	-3.3798	-0.681874	Yes
row_214	RRP7A	17604	-3.42749	-0.680957	Yes
row_215	RRP8	17615	-3.43815	-0.679623	Yes
row_216	BMS1	17620	-3.44446	-0.677977	Yes
row_217	TRMT61B	17637	-3.4793	-0.676929	Yes
row_218	NSUN6	17641	-3.48237	-0.675211	Yes
row_219	BUD23	17643	-3.48303	-0.673391	Yes
row_220	NSUN4	17707	-3.57963	-0.674705	Yes
row_221	TRMT5	17723	-3.60847	-0.673536	Yes
row_222	PDCD11	17740	-3.62867	-0.672408	Yes
row_223	KRI1	17752	-3.64562	-0.671014	Yes
row_224	TRMT6	17800	-3.72088	-0.67143	Yes
row_225	WDR74	17810	-3.73873	-0.669883	Yes
row_226	RRP9	17862	-3.82288	-0.67045	Yes
row_227	PWP2	17866	-3.83393	-0.668543	Yes
row_228	RPL10A	17876	-3.85077	-0.666936	Yes
row_229	PRKDC	17889	-3.86761	-0.665474	Yes
row_230	RPS8	17909	-3.89958	-0.664354	Yes
row_231	UTP6	17927	-3.92102	-0.663121	Yes
row_232	RPL35	17940	-3.93785	-0.661621	Yes
row_233	OSGEP	17962	-3.97507	-0.660563	Yes
row_234	EXOSC5	17963	-3.97642	-0.658426	Yes
row_235	TSEN2	17997	-4.03769	-0.657952	Yes
row_236	TYW1	18042	-4.13193	-0.657993	Yes
row_237	METTL1	18069	-4.17416	-0.657086	Yes
row_238	PPAN	18080	-4.18744	-0.655349	Yes
row_239	MRPL1	18087	-4.19805	-0.653401	Yes
row_240	NAF1	18106	-4.2371	-0.652048	Yes
row_241	SSB	18111	-4.25489	-0.649967	Yes
row_242	NHP2	18129	-4.28812	-0.648536	Yes
row_243	RIOK2	18158	-4.34192	-0.647641	Yes
row_244	LAS1L	18163	-4.35015	-0.645508	Yes
row_245	THUMPD3	18168	-4.35881	-0.643371	Yes
row_246	KARS1	18196	-4.42465	-0.642381	Yes
row_247	METTL15	18212	-4.44746	-0.640761	Yes
row_248	INTS8	18234	-4.48712	-0.639429	Yes
row_249	ZNHIT6	18284	-4.58555	-0.639483	Yes
row_250	PRORP	18287	-4.58955	-0.637118	Yes
row_251	EXOSC3	18292	-4.60167	-0.63485	Yes
row_252	RRP15	18311	-4.67103	-0.633265	Yes
row_253	WDR46	18324	-4.70607	-0.631352	Yes
row_254	NOP2	18361	-4.78336	-0.630632	Yes
row_255	UTP14A	18374	-4.80321	-0.628667	Yes
row_256	UTP4	18384	-4.82215	-0.626537	Yes
row_257	EMG1	18387	-4.82508	-0.624046	Yes
row_258	RPUSD4	18401	-4.86388	-0.6221	Yes
row_259	RPF1	18404	-4.87039	-0.619585	Yes
row_260	THADA	18407	-4.87594	-0.617067	Yes
row_261	XRN2	18428	-4.93644	-0.615442	Yes
row_262	METTL8	18447	-4.98336	-0.613688	Yes
row_263	TSEN15	18473	-5.05735	-0.612255	Yes
row_264	TRNT1	18496	-5.12972	-0.610628	Yes
row_265	RPS24	18548	-5.267	-0.610419	Yes
row_266	ESF1	18586	-5.36645	-0.609436	Yes
row_267	DDX52	18591	-5.38574	-0.606747	Yes
row_268	POP5	18696	-5.73414	-0.609011	Yes
row_269	SHQ1	18699	-5.74086	-0.606028	Yes
row_270	RPS25	18729	-5.8503	-0.604374	Yes
row_271	HNRNPA2B1	18756	-5.94186	-0.602516	Yes
row_272	RPS17	18761	-5.95864	-0.599519	Yes
row_273	FBL	18795	-6.12473	-0.597923	Yes
row_274	TYW3	18796	-6.13116	-0.594627	Yes
row_275	RPL7A	18812	-6.21963	-0.592055	Yes
row_276	RPL27	18828	-6.26953	-0.589456	Yes
row_277	UTP11	18832	-6.27303	-0.586239	Yes
row_278	RPL35A	18840	-6.31496	-0.583204	Yes
row_279	TP53RK	18846	-6.32366	-0.580062	Yes
row_280	WDR4	18867	-6.41922	-0.577639	Yes
row_281	EBNA1BP2	18875	-6.44633	-0.574534	Yes
row_282	HELB	18896	-6.51828	-0.572059	Yes
row_283	MTREX	18903	-6.55245	-0.568845	Yes
row_284	THG1L	18918	-6.61744	-0.566008	Yes
row_285	POLR3K	18920	-6.62298	-0.562499	Yes
row_286	MDN1	18927	-6.66391	-0.559225	Yes
row_287	URB1	18950	-6.75654	-0.556724	Yes
row_288	NPM3	18962	-6.79615	-0.553637	Yes
row_289	RPS14	18980	-6.86674	-0.55082	Yes
row_290	FCF1	18984	-6.88658	-0.547272	Yes
row_291	RPS7	18991	-6.90648	-0.543868	Yes
row_292	RPP40	18995	-6.9341	-0.540295	Yes
row_293	RPL7	19002	-6.97266	-0.536856	Yes
row_294	DDX27	19007	-6.98361	-0.533307	Yes
row_295	TSR1	19011	-7.01278	-0.529692	Yes
row_296	NOL6	19020	-7.03507	-0.526322	Yes
row_297	SRFBP1	19029	-7.07699	-0.522929	Yes
row_298	MRTO4	19051	-7.2002	-0.520138	Yes
row_299	POP1	19052	-7.21395	-0.516261	Yes
row_300	BRIX1	19053	-7.21428	-0.512383	Yes
row_301	RPL14	19061	-7.28538	-0.508826	Yes
row_302	METTL2B	19087	-7.43465	-0.506115	Yes
row_303	TARBP1	19115	-7.6295	-0.503402	Yes
row_304	EXOSC8	19119	-7.64033	-0.499449	Yes
row_305	WDR36	19129	-7.71768	-0.495764	Yes
row_306	PA2G4	19132	-7.73768	-0.491707	Yes
row_307	RPL11	19142	-7.82039	-0.487966	Yes
row_308	THUMPD2	19163	-7.96734	-0.484712	Yes
row_309	USP36	19185	-8.0931	-0.481441	Yes
row_310	METTL16	19216	-8.30464	-0.478519	Yes
row_311	METTL2A	19218	-8.31542	-0.474101	Yes
row_312	NOB1	19244	-8.48432	-0.470825	Yes
row_313	RRP12	19282	-8.85846	-0.467966	Yes
row_314	RPS6	19322	-9.17772	-0.465037	Yes
row_315	RIOK1	19331	-9.27302	-0.460464	Yes
row_316	LIN28B	19335	-9.29184	-0.455624	Yes
row_317	NOP56	19337	-9.29777	-0.450677	Yes
row_318	UTP15	19343	-9.35031	-0.445908	Yes
row_319	RPF2	19351	-9.39676	-0.441217	Yes
row_320	NAT10	19354	-9.42726	-0.436253	Yes
row_321	ZCCHC8	19363	-9.51296	-0.43155	Yes
row_322	RCL1	19368	-9.59521	-0.426598	Yes
row_323	CHD7	19390	-9.82898	-0.422395	Yes
row_324	TRDMT1	19394	-9.88869	-0.417233	Yes
row_325	DKC1	19398	-9.90749	-0.412062	Yes
row_326	GRSF1	19419	-10.1794	-0.407619	Yes
row_327	DDX47	19420	-10.1981	-0.402137	Yes
row_328	EXOSC7	19425	-10.2644	-0.396825	Yes
row_329	ADAT2	19443	-10.4846	-0.392063	Yes
row_330	NIFK	19451	-10.6329	-0.386708	Yes
row_331	OSGEPL1	19462	-10.7263	-0.381456	Yes
row_332	DIMT1	19473	-10.9074	-0.376107	Yes
row_333	WDR75	19475	-10.9323	-0.370282	Yes
row_334	ZCCHC4	19486	-11.0526	-0.364855	Yes
row_335	ALKBH8	19515	-11.4877	-0.36012	Yes
row_336	GAR1	19518	-11.5314	-0.354024	Yes
row_337	UTP18	19520	-11.5714	-0.347856	Yes
row_338	AGO2	19528	-11.7076	-0.341922	Yes
row_339	DDX10	19535	-11.8288	-0.335872	Yes
row_340	INTS10	19556	-12.1693	-0.330359	Yes
row_341	NOP58	19561	-12.3036	-0.323951	Yes
row_342	NOL8	19571	-12.5343	-0.317677	Yes
row_343	UTP20	19600	-13.3279	-0.311952	Yes
row_344	MAK16	19609	-13.5477	-0.305081	Yes
row_345	QTRT2	19616	-13.7792	-0.297983	Yes
row_346	WDR3	19622	-13.9021	-0.290767	Yes
row_347	NOL11	19625	-13.9454	-0.283374	Yes
row_348	RPL7L1	19630	-14.1405	-0.275979	Yes
row_349	RPL26	19637	-14.3729	-0.268561	Yes
row_350	DDX18	19647	-14.7675	-0.261086	Yes
row_351	IMP4	19680	-15.8596	-0.254206	Yes
row_352	NOP14	19684	-16.2159	-0.245644	Yes
row_353	LYAR	19688	-16.3921	-0.236987	Yes
row_354	RSL1D1	19707	-17.3496	-0.228586	Yes
row_355	DDX21	19720	-18.0909	-0.219479	Yes
row_356	PWP1	19726	-18.5691	-0.209755	Yes
row_357	GTPBP4	19730	-18.9766	-0.199709	Yes
row_358	RRP1B	19740	-19.9646	-0.18944	Yes
row_359	DCAF13	19744	-20.1999	-0.178736	Yes
row_360	RRS1	19753	-20.9412	-0.167891	Yes
row_361	PUS7	19759	-21.483	-0.1566	Yes
row_362	WDR12	19760	-21.5358	-0.145024	Yes
row_363	SMAD3	19761	-22.0529	-0.133171	Yes
row_364	UTP25	19763	-22.5696	-0.12109	Yes
row_365	RPL5	19764	-22.6145	-0.108934	Yes
row_366	TFB2M	19766	-22.7132	-0.096777	Yes
row_367	UTP3	19768	-22.8226	-0.0845608	Yes
row_368	NOL10	19773	-23.8614	-0.0719404	Yes
row_369	HEATR1	19777	-24.2964	-0.0590347	Yes
row_370	WDR43	19790	-26.2306	-0.045552	Yes
row_371	NSUN2	19794	-27.3908	-0.0309831	Yes
row_372	NOLC1	19824	-60.6051	0.000102798	Yes

## Sheet: GOBP_RIBOSOME_BIOGENESIS
GOBP_RIBOSOME_BIOGENESIS
NAME	SYMBOL	RANK IN GENE LIST	RANK METRIC SCORE	RUNNING ES	CORE ENRICHMENT
row_124	MRPS7	17159	-2.81972	-0.75451	Yes
row_125	MPHOSPH10	17167	-2.82244	-0.753243	Yes
row_126	DDX56	17189	-2.8419	-0.752682	Yes
row_127	EXOSC2	17200	-2.85388	-0.751551	Yes
row_128	FTSJ3	17207	-2.86725	-0.750208	Yes
row_129	BYSL	17208	-2.8697	-0.748556	Yes
row_130	MRM3	17260	-2.94636	-0.749471	Yes
row_131	EXOSC9	17326	-3.02863	-0.751056	Yes
row_132	PES1	17359	-3.06726	-0.750928	Yes
row_133	DHX37	17383	-3.10441	-0.750319	Yes
row_134	DHX29	17401	-3.13198	-0.749386	Yes
row_135	POP4	17461	-3.2114	-0.750559	Yes
row_136	RAN	17481	-3.24402	-0.749664	Yes
row_137	NGDN	17528	-3.30651	-0.750116	Yes
row_138	METTL5	17541	-3.31832	-0.74882	Yes
row_139	DDX28	17567	-3.36009	-0.748165	Yes
row_140	IMP3	17575	-3.36828	-0.746585	Yes
row_141	RRP7A	17604	-3.42749	-0.746045	Yes
row_142	RRP8	17615	-3.43815	-0.744578	Yes
row_143	BMS1	17620	-3.44446	-0.742799	Yes
row_144	TRMT61B	17637	-3.4793	-0.741616	Yes
row_145	BUD23	17643	-3.48303	-0.739866	Yes
row_146	NSUN4	17707	-3.57963	-0.741031	Yes
row_147	PDCD11	17740	-3.62867	-0.740581	Yes
row_148	KRI1	17752	-3.64562	-0.739045	Yes
row_149	RRN3	17778	-3.68141	-0.738206	Yes
row_150	WDR74	17810	-3.73873	-0.737641	Yes
row_151	SURF6	17841	-3.78183	-0.737	Yes
row_152	RRP9	17862	-3.82288	-0.735823	Yes
row_153	PWP2	17866	-3.83393	-0.733769	Yes
row_154	RPL10A	17876	-3.85077	-0.732013	Yes
row_155	RSL24D1	17882	-3.86147	-0.730046	Yes
row_156	PRKDC	17889	-3.86761	-0.728127	Yes
row_157	RPS8	17909	-3.89958	-0.726855	Yes
row_158	UTP6	17927	-3.92102	-0.725468	Yes
row_159	RPL35	17940	-3.93785	-0.723815	Yes
row_160	EXOSC5	17963	-3.97642	-0.722652	Yes
row_161	XPO1	18040	-4.12386	-0.72417	Yes
row_162	PPAN	18080	-4.18744	-0.723756	Yes
row_163	MRPL1	18087	-4.19805	-0.721646	Yes
row_164	GLUL	18089	-4.20077	-0.719279	Yes
row_165	NAF1	18106	-4.2371	-0.717659	Yes
row_166	NHP2	18129	-4.28812	-0.716317	Yes
row_167	MALSU1	18156	-4.33846	-0.71515	Yes
row_168	RIOK2	18158	-4.34192	-0.712702	Yes
row_169	LAS1L	18163	-4.35015	-0.710402	Yes
row_170	RPS27L	18183	-4.39209	-0.708847	Yes
row_171	GNL2	18194	-4.41884	-0.706815	Yes
row_172	METTL15	18212	-4.44746	-0.705125	Yes
row_173	RPL3	18244	-4.50343	-0.704119	Yes
row_174	FASTKD2	18257	-4.52329	-0.70213	Yes
row_175	RIOX2	18259	-4.52457	-0.699576	Yes
row_176	ZNHIT6	18284	-4.58555	-0.698165	Yes
row_177	RPL26L1	18285	-4.58656	-0.695524	Yes
row_178	EXOSC3	18292	-4.60167	-0.693182	Yes
row_179	RRP15	18311	-4.67103	-0.691415	Yes
row_180	WDR46	18324	-4.70607	-0.68932	Yes
row_181	NOP2	18361	-4.78336	-0.688409	Yes
row_182	RPL24	18364	-4.79314	-0.685752	Yes
row_183	UTP14A	18374	-4.80321	-0.683448	Yes
row_184	UTP4	18384	-4.82215	-0.681132	Yes
row_185	EMG1	18387	-4.82508	-0.678457	Yes
row_186	RPUSD4	18401	-4.86388	-0.676322	Yes
row_187	RPF1	18404	-4.87039	-0.673621	Yes
row_188	XRN2	18428	-4.93644	-0.671957	Yes
row_189	PINX1	18498	-5.13338	-0.672534	Yes
row_190	RPL23A	18503	-5.14814	-0.669775	Yes
row_191	RPS24	18548	-5.267	-0.668996	Yes
row_192	MYBBP1A	18582	-5.35349	-0.667604	Yes
row_193	ESF1	18586	-5.36645	-0.664668	Yes
row_194	DDX52	18591	-5.38574	-0.661772	Yes
row_195	RPL38	18650	-5.59173	-0.661523	Yes
row_196	POP5	18696	-5.73414	-0.660526	Yes
row_197	SHQ1	18699	-5.74086	-0.657323	Yes
row_198	RPS25	18729	-5.8503	-0.65544	Yes
row_199	RPS17	18761	-5.95864	-0.653597	Yes
row_200	FBL	18795	-6.12473	-0.65176	Yes
row_201	RPL7A	18812	-6.21963	-0.648999	Yes
row_202	RPL27	18828	-6.26953	-0.646157	Yes
row_203	UTP11	18832	-6.27303	-0.642699	Yes
row_204	RPL35A	18840	-6.31496	-0.639422	Yes
row_205	MTERF3	18863	-6.40034	-0.636864	Yes
row_206	EBNA1BP2	18875	-6.44633	-0.633716	Yes
row_207	GTF3A	18878	-6.45697	-0.630101	Yes
row_208	RPL6	18894	-6.50991	-0.627121	Yes
row_209	HELB	18896	-6.51828	-0.62342	Yes
row_210	MTREX	18903	-6.55245	-0.619954	Yes
row_211	MDN1	18927	-6.66391	-0.617296	Yes
row_212	GNL3L	18929	-6.67089	-0.613506	Yes
row_213	URB1	18950	-6.75654	-0.610641	Yes
row_214	NPM3	18962	-6.79615	-0.607291	Yes
row_215	RPS14	18980	-6.86674	-0.604208	Yes
row_216	FCF1	18984	-6.88658	-0.600397	Yes
row_217	RPS7	18991	-6.90648	-0.596728	Yes
row_218	RPP40	18995	-6.9341	-0.59289	Yes
row_219	RPL7	19002	-6.97266	-0.589183	Yes
row_220	DDX27	19007	-6.98361	-0.585367	Yes
row_221	TSR1	19011	-7.01278	-0.581483	Yes
row_222	NOL6	19020	-7.03507	-0.577843	Yes
row_223	SRFBP1	19029	-7.07699	-0.574178	Yes
row_224	MRTO4	19051	-7.2002	-0.571108	Yes
row_225	BRIX1	19053	-7.21428	-0.567006	Yes
row_226	RPL14	19061	-7.28538	-0.56317	Yes
row_227	NLE1	19098	-7.53047	-0.560678	Yes
row_228	EXOSC8	19119	-7.64033	-0.557303	Yes
row_229	WDR36	19129	-7.71768	-0.553321	Yes
row_230	PA2G4	19132	-7.73768	-0.548968	Yes
row_231	RPL11	19142	-7.82039	-0.544927	Yes
row_232	USP36	19185	-8.0931	-0.542418	Yes
row_233	ABCE1	19198	-8.15344	-0.538339	Yes
row_234	METTL16	19216	-8.30464	-0.534428	Yes
row_235	NOB1	19244	-8.48432	-0.530926	Yes
row_236	RRP12	19282	-8.85846	-0.527721	Yes
row_237	RPS6	19322	-9.17772	-0.524434	Yes
row_238	RIOK1	19331	-9.27302	-0.519505	Yes
row_239	NOP56	19337	-9.29777	-0.514408	Yes
row_240	UTP15	19343	-9.35031	-0.509281	Yes
row_241	LSG1	19347	-9.38395	-0.504032	Yes
row_242	RPF2	19351	-9.39676	-0.498775	Yes
row_243	NAT10	19354	-9.42726	-0.49345	Yes
row_244	C1QBP	19361	-9.50705	-0.488284	Yes
row_245	RCL1	19368	-9.59521	-0.483067	Yes
row_246	CHD7	19390	-9.82898	-0.478484	Yes
row_247	DKC1	19398	-9.90749	-0.473138	Yes
row_248	URB2	19412	-10.1133	-0.467982	Yes
row_249	GPATCH4	19413	-10.1201	-0.462155	Yes
row_250	DDX47	19420	-10.1981	-0.456591	Yes
row_251	EXOSC7	19425	-10.2644	-0.450887	Yes
row_252	NIFK	19451	-10.6329	-0.446045	Yes
row_253	DIMT1	19473	-10.9074	-0.440841	Yes
row_254	WDR75	19475	-10.9323	-0.434598	Yes
row_255	ZCCHC4	19486	-11.0526	-0.428747	Yes
row_256	SDAD1	19488	-11.0908	-0.422413	Yes
row_257	LTV1	19493	-11.168	-0.416188	Yes
row_258	GAR1	19518	-11.5314	-0.410778	Yes
row_259	UTP18	19520	-11.5714	-0.404168	Yes
row_260	DDX10	19535	-11.8288	-0.398074	Yes
row_261	HEATR3	19550	-12.0064	-0.391879	Yes
row_262	NOP58	19561	-12.3036	-0.385308	Yes
row_263	NOL8	19571	-12.5343	-0.378552	Yes
row_264	UTP20	19600	-13.3279	-0.372313	Yes
row_265	MAK16	19609	-13.5477	-0.364923	Yes
row_266	WDR3	19622	-13.9021	-0.357534	Yes
row_267	NOL11	19625	-13.9454	-0.349607	Yes
row_268	RPL7L1	19630	-14.1405	-0.341671	Yes
row_269	RPL26	19637	-14.3729	-0.333704	Yes
row_270	DDX18	19647	-14.7675	-0.325663	Yes
row_271	NOP16	19668	-15.4505	-0.317792	Yes
row_272	IMP4	19680	-15.8596	-0.309224	Yes
row_273	NPM1	19683	-16.0404	-0.300092	Yes
row_274	NOP14	19684	-16.2159	-0.290756	Yes
row_275	EIF2A	19687	-16.3203	-0.281462	Yes
row_276	LYAR	19688	-16.3921	-0.272025	Yes
row_277	NOM1	19691	-16.5598	-0.262594	Yes
row_278	RSL1D1	19707	-17.3496	-0.253373	Yes
row_279	CUL4A	19715	-17.7029	-0.24354	Yes
row_280	DDX21	19720	-18.0909	-0.233329	Yes
row_281	PWP1	19726	-18.5691	-0.222895	Yes
row_282	GTPBP4	19730	-18.9766	-0.212123	Yes
row_283	RRP1B	19740	-19.9646	-0.20109	Yes
row_284	DDX31	19741	-20.0684	-0.189536	Yes
row_285	DCAF13	19744	-20.1999	-0.178009	Yes
row_286	RRS1	19753	-20.9412	-0.166362	Yes
row_287	WDR12	19760	-21.5358	-0.154271	Yes
row_288	UTP25	19763	-22.5696	-0.14138	Yes
row_289	RPL5	19764	-22.6145	-0.12836	Yes
row_290	TFB2M	19766	-22.7132	-0.115335	Yes
row_291	UTP3	19768	-22.8226	-0.102247	Yes
row_292	PAK1IP1	19770	-23.3926	-0.0888302	Yes
row_293	NIP7	19772	-23.8366	-0.0751582	Yes
row_294	NOL10	19773	-23.8614	-0.0614207	Yes
row_295	HEATR1	19777	-24.2964	-0.0475864	Yes
row_296	WDR43	19790	-26.2306	-0.0330994	Yes
row_297	NOLC1	19824	-60.6051	0.000102404	Yes

## Sheet: IMR32_GOCC_RIBOSOME
IMR32_GOCC_RIBOSOME
NAME	SYMBOL	RANK IN GENE LIST	RANK METRIC SCORE	RUNNING ES	CORE ENRICHMENT
row_109	RPL13A	17092	-2.74721	-0.659681	Yes
row_110	MRPL16	17123	-2.78268	-0.657859	Yes
row_111	RPS13	17141	-2.79886	-0.655355	Yes
row_112	MRPS7	17159	-2.81972	-0.652826	Yes
row_113	RPL37AP8	17173	-2.82599	-0.650085	Yes
row_114	MRPL17	17257	-2.94379	-0.65077	Yes
row_115	MRPL57	17278	-2.9698	-0.648213	Yes
row_116	MRPS34	17288	-2.98455	-0.645077	Yes
row_117	MRPS18B	17350	-3.05871	-0.644503	Yes
row_118	RPL8	17361	-3.07319	-0.641311	Yes
row_119	DHX29	17401	-3.13198	-0.639527	Yes
row_120	RPL18	17524	-3.29986	-0.641771	Yes
row_121	MRPL15	17574	-3.3663	-0.640214	Yes
row_122	MRPS30	17587	-3.38891	-0.636744	Yes
row_123	RPS11	17596	-3.4109	-0.633045	Yes
row_124	RPL39	17654	-3.50577	-0.631728	Yes
row_125	NSUN4	17707	-3.57963	-0.630067	Yes
row_126	MRPL47	17771	-3.67099	-0.628857	Yes
row_127	RPL36	17838	-3.77975	-0.627668	Yes
row_128	RPL10A	17876	-3.85077	-0.624917	Yes
row_129	RSL24D1	17882	-3.86147	-0.620521	Yes
row_130	RPS8	17909	-3.89958	-0.61715	Yes
row_131	RPL35	17940	-3.93785	-0.613937	Yes
row_132	MRPL45	18015	-4.08027	-0.612795	Yes
row_133	MRPL1	18087	-4.19805	-0.611357	Yes
row_134	CANX	18132	-4.28946	-0.608434	Yes
row_135	RPL4	18142	-4.30318	-0.603711	Yes
row_136	DAP3	18150	-4.32209	-0.598863	Yes
row_137	APEX1	18171	-4.36347	-0.594627	Yes
row_138	RPS23	18181	-4.38819	-0.589802	Yes
row_139	RPS27L	18183	-4.39209	-0.584564	Yes
row_140	RPL3	18244	-4.50343	-0.582198	Yes
row_141	LARP1	18245	-4.50362	-0.576775	Yes
row_142	MRPL11	18263	-4.53079	-0.572185	Yes
row_143	RPL26L1	18285	-4.58656	-0.567732	Yes
row_144	MRPS15	18305	-4.65464	-0.563095	Yes
row_145	RPL41	18339	-4.76035	-0.559044	Yes
row_146	RPS15A	18355	-4.77573	-0.554057	Yes
row_147	RPL24	18364	-4.79314	-0.548693	Yes
row_148	RPL37A	18415	-4.88905	-0.545354	Yes
row_149	RPL13	18438	-4.96362	-0.540497	Yes
row_150	MRPS10	18440	-4.96974	-0.534564	Yes
row_151	RACK1	18463	-5.03246	-0.529625	Yes
row_152	RPL23A	18503	-5.14814	-0.525412	Yes
row_153	RPS4X	18516	-5.16765	-0.519801	Yes
row_154	RPL29	18520	-5.17665	-0.51372	Yes
row_155	MRPS35	18521	-5.18036	-0.507482	Yes
row_156	RPS24	18548	-5.267	-0.502464	Yes
row_157	RPL37	18622	-5.47736	-0.499588	Yes
row_158	RPL38	18650	-5.59173	-0.49423	Yes
row_159	RPS3	18662	-5.6305	-0.48801	Yes
row_160	RPS27A	18666	-5.64394	-0.481367	Yes
row_161	MRPL35	18701	-5.74318	-0.476183	Yes
row_162	RPS25	18729	-5.8503	-0.470514	Yes
row_163	RPS17	18761	-5.95864	-0.464918	Yes
row_164	MRPL19	18790	-6.10564	-0.458993	Yes
row_165	RPL7A	18812	-6.21963	-0.452573	Yes
row_166	RPL27	18828	-6.26953	-0.445788	Yes
row_167	RPL35A	18840	-6.31496	-0.438743	Yes
row_168	RPS2	18842	-6.31838	-0.431186	Yes
row_169	RPS4Y1	18868	-6.42399	-0.424724	Yes
row_170	RPL6	18894	-6.50991	-0.418158	Yes
row_171	RPS10	18905	-6.55562	-0.410773	Yes
row_172	MRPL39	18945	-6.73676	-0.404648	Yes
row_173	RPS14	18980	-6.86674	-0.398112	Yes
row_174	RPS7	18991	-6.90648	-0.390304	Yes
row_175	RPL7	19002	-6.97266	-0.382417	Yes
row_176	MRPS22	19056	-7.2414	-0.376398	Yes
row_177	RPL14	19061	-7.28538	-0.367829	Yes
row_178	RPL11	19142	-7.82039	-0.362488	Yes
row_179	RPL31	19150	-7.90712	-0.353323	Yes
row_180	RPL32	19248	-8.51214	-0.348015	Yes
row_181	MRPL30	19280	-8.83028	-0.338961	Yes
row_182	RPL22	19283	-8.86651	-0.328386	Yes
row_183	MRPS27	19319	-9.13348	-0.319171	Yes
row_184	RPS6	19322	-9.17772	-0.308221	Yes
row_185	RPS18	19406	-10.0118	-0.300394	Yes
row_186	RPL12	19459	-10.7054	-0.290152	Yes
row_187	EIF3H	19460	-10.7059	-0.27726	Yes
row_188	RPS3A	19498	-11.2405	-0.265609	Yes
row_189	RPL34	19501	-11.2623	-0.252149	Yes
row_190	RPL9	19524	-11.64	-0.239253	Yes
row_191	MRPS9	19551	-12.0267	-0.226095	Yes
row_192	RPL17	19557	-12.2266	-0.211626	Yes
row_193	RPL36A	19559	-12.2645	-0.196908	Yes
row_194	RPL23	19566	-12.4405	-0.182232	Yes
row_195	RPL22L1	19582	-12.8051	-0.167577	Yes
row_196	RPL7L1	19630	-14.1405	-0.152943	Yes
row_197	BTF3	19632	-14.2223	-0.135867	Yes
row_198	PNPT1	19635	-14.3158	-0.11873	Yes
row_199	RPL26	19637	-14.3729	-0.101473	Yes
row_200	MRPL3	19648	-14.8238	-0.084131	Yes
row_201	EIF2A	19687	-16.3203	-0.0664141	Yes
row_202	RPL5	19764	-22.6145	-0.0430541	Yes
row_203	RPL15	19817	-38.3341	0.000458887	Yes

## Sheet: GOBP_NEURON_PROJECTION_GUIDANCE
GOBP_NEURON_PROJECTION_GUIDANCE
NAME	SYMBOL	RANK IN GENE LIST	RANK METRIC SCORE	RUNNING ES	CORE ENRICHMENT
row_0	NCAM1	3	80.0427	0.0711916	Yes
row_1	NRP1	9	54.4131	0.119437	Yes
row_2	RET	20	44.0766	0.158215	Yes
row_3	PLXNC1	25	38.64	0.192452	Yes
row_4	UNC5C	36	34.3749	0.222582	Yes
row_5	CHL1	37	34.2355	0.253097	Yes
row_6	GAP43	45	32.2467	0.281483	Yes
row_7	CNTN1	78	24.9275	0.302072	Yes
row_8	DCC	85	24.4232	0.323536	Yes
row_9	ISL1	141	19.6228	0.338226	Yes
row_10	DRAXIN	158	18.436	0.353844	Yes
row_11	KALRN	168	18.175	0.369585	Yes
row_12	TRIO	206	16.6398	0.382533	Yes
row_13	CNTN5	244	15.4924	0.394458	Yes
row_14	APP	267	14.9967	0.406704	Yes
row_15	GATA3	281	14.7294	0.419171	Yes
row_16	KIF5A	362	13.0638	0.426742	Yes
row_17	KIF5C	370	12.9109	0.437893	Yes
row_18	KLF7	425	12.1486	0.445972	Yes
row_19	DPYSL2	441	11.908	0.455822	Yes
row_20	PTPRO	499	11.1676	0.462874	Yes
row_21	TUBB2B	514	11.0573	0.472016	Yes
row_22	NRXN1	528	10.9169	0.481085	Yes
row_23	PALLD	576	10.5343	0.488081	Yes
row_24	NEO1	603	10.2801	0.49592	Yes
row_25	CNTN2	627	10.0743	0.503729	Yes
row_26	PLXNA2	643	9.97004	0.511852	Yes
row_27	L1CAM	650	9.92449	0.520392	Yes
row_28	PLXNA4	672	9.76285	0.528025	Yes
row_29	RNF165	706	9.51039	0.534821	Yes
row_30	PTCH1	766	9.10656	0.539934	Yes
row_31	ETV1	777	9.02062	0.547465	Yes
row_32	LAMA5	818	8.75222	0.55323	Yes
row_33	BMPR2	998	7.80128	0.551068	Yes
row_34	NFIB	1041	7.63342	0.555734	Yes
row_35	OPHN1	1136	7.21359	0.557377	Yes
row_36	EFNA5	1154	7.15001	0.562884	Yes
row_37	EXT1	1205	6.97496	0.566555	Yes
row_38	SLIT3	1208	6.95824	0.572656	Yes
row_39	RELN	1209	6.95604	0.578856	Yes
row_40	PTPRM	1263	6.78663	0.582206	Yes
row_41	EFNB3	1297	6.66021	0.586462	Yes
row_42	NRCAM	1307	6.63449	0.591918	Yes
row_43	ARHGAP35	1311	6.61937	0.597665	Yes
row_44	NFASC	1377	6.41447	0.600073	Yes
row_45	SEMA6D	1489	6.15586	0.599907	Yes
row_46	WNT3	1567	5.94299	0.601284	Yes
row_47	EFNA2	1682	5.64706	0.600512	Yes
row_48	TNR	1710	5.58795	0.604118	Yes
row_49	SIAH1	1754	5.48964	0.606822	Yes
row_50	DAG1	1796	5.39614	0.609544	Yes
row_51	SEMA4F	1801	5.38614	0.614141	Yes
row_52	FYN	1821	5.34353	0.617936	Yes
row_53	CDK5R2	1896	5.21396	0.618816	Yes
row_54	SEMA6C	1964	5.0978	0.619948	Yes
row_55	ECE1	2003	5.02265	0.62249	Yes
row_56	RAC1	2114	4.84099	0.621204	Yes
row_57	ROBO2	2123	4.81727	0.62509	Yes

## Sheet: GOCC_GLUTAMATERGIC_SYNAPSE
GOCC_GLUTAMATERGIC_SYNAPSE
NAME	SYMBOL	RANK IN GENE LIST	RANK METRIC SCORE	RUNNING ES	CORE ENRICHMENT
row_0	NRP1	9	54.4131	0.0439197	Yes
row_1	SLC4A8	42	32.9372	0.0691471	Yes
row_2	CNR1	57	27.908	0.0911932	Yes
row_3	NSG1	69	25.9119	0.111765	Yes
row_4	PCDH17	70	25.8296	0.132832	Yes
row_5	SHANK2	170	18.1038	0.142534	Yes
row_6	CLCN3	190	17.2186	0.155606	Yes
row_7	ATP2B4	193	17.1398	0.169484	Yes
row_8	CLSTN2	211	16.5739	0.182132	Yes
row_9	SYT1	270	14.9274	0.191341	Yes
row_10	ADGRL3	287	14.591	0.202423	Yes
row_11	NAPB	304	14.0667	0.213078	Yes
row_12	PAK3	341	13.5668	0.222302	Yes
row_13	APBA1	347	13.439	0.233007	Yes
row_14	SHISA6	386	12.7139	0.241434	Yes
row_15	NLGN4X	397	12.5059	0.251122	Yes
row_16	DNM3	406	12.3997	0.260826	Yes
row_17	NLGN4Y	426	12.1393	0.269756	Yes
row_18	CALB1	467	11.6065	0.277176	Yes
row_19	FARP1	490	11.3204	0.285284	Yes
row_20	NRG1	493	11.3039	0.294402	Yes
row_21	PTPRO	499	11.1676	0.303254	Yes
row_22	NTRK3	501	11.1523	0.312299	Yes
row_23	GSG1L	512	11.0903	0.320833	Yes
row_24	SPTBN1	519	10.9882	0.329488	Yes
row_25	STAU1	570	10.5795	0.33556	Yes
row_26	GABBR1	587	10.4695	0.343281	Yes
row_27	DYNLL2	591	10.4324	0.351636	Yes
row_28	PLPPR4	645	9.96386	0.357053	Yes
row_29	ARPC2	764	9.12581	0.358461	Yes
row_30	CTNND1	797	8.92466	0.364104	Yes
row_31	GSK3B	826	8.70375	0.369771	Yes
row_32	CADPS	827	8.69677	0.376864	Yes
row_33	CDH11	828	8.69176	0.383953	Yes
row_34	LRRC4	886	8.39801	0.387887	Yes
row_35	KCND2	942	8.11365	0.391692	Yes
row_36	ADCY1	976	7.93529	0.396477	Yes
row_37	RNF19A	1046	7.61979	0.399163	Yes
row_38	STXBP1	1093	7.37845	0.402828	Yes
row_39	ACTB	1105	7.31575	0.408233	Yes
row_40	OPHN1	1136	7.21359	0.412582	Yes
row_41	CACNG4	1146	7.16969	0.417969	Yes
row_42	SNAP25	1173	7.10301	0.422433	Yes
row_43	SYN2	1232	6.89125	0.425087	Yes
row_44	CRTC1	1286	6.69365	0.427836	Yes
row_45	EFNB3	1297	6.66021	0.432757	Yes
row_46	NRCAM	1307	6.63449	0.437708	Yes
row_47	FBXL20	1470	6.19704	0.434478	Yes
row_48	SLC1A2	1504	6.11071	0.437774	Yes
row_49	LRRTM2	1511	6.10068	0.442443	Yes
row_50	PACSIN2	1592	5.86399	0.443134	Yes
row_51	ELAVL4	1608	5.8093	0.447105	Yes
row_52	CLSTN3	1611	5.80493	0.451738	Yes
row_53	PPP3CB	1695	5.62203	0.452078	Yes
row_54	TNR	1710	5.58795	0.45592	Yes
row_55	SV2A	1730	5.55101	0.459476	Yes
row_56	DAG1	1796	5.39614	0.460553	Yes
row_57	CHRM1	1799	5.39284	0.464849	Yes
row_58	NTNG1	1898	5.20795	0.464085	Yes
row_59	ITGB3	1911	5.18643	0.467701	Yes
row_60	JAK2	1955	5.11185	0.469672	Yes
row_61	SH3GL2	1957	5.10935	0.473788	Yes
row_62	FLOT2	1972	5.08543	0.477219	Yes
row_63	ATP2B3	1985	5.05104	0.480725	Yes
row_64	NOS1AP	1987	5.04965	0.484793	Yes
row_65	FLOT1	2065	4.91149	0.484861	Yes
row_66	YWHAZ	2090	4.86756	0.487604	Yes
row_67	RAC1	2114	4.84099	0.490376	Yes
row_68	CACNG5	2125	4.81354	0.49379	Yes
row_69	FXYD6	2136	4.80177	0.497195	Yes
row_70	PLEKHA5	2168	4.72909	0.499467	Yes
row_71	NLGN3	2217	4.66247	0.500815	Yes
row_72	GRIK2	2281	4.57315	0.501323	Yes
row_73	CNIH2	2382	4.43979	0.49983	Yes
row_74	EPHB2	2386	4.43086	0.503291	Yes
row_75	ABHD6	2455	4.32918	0.503344	Yes
row_76	PRKAR1A	2556	4.20919	0.501663	Yes
row_77	ITGB1	2573	4.1883	0.504261	Yes
row_78	GRIK5	2575	4.18689	0.507625	Yes
row_79	SCN2A	2610	4.15931	0.509278	Yes
row_80	PLCB1	2614	4.15567	0.512514	Yes
row_81	SHISA7	2618	4.15283	0.515748	Yes
row_82	DLGAP2	2640	4.12241	0.518036	Yes
row_83	CPT1C	2647	4.11311	0.521084	Yes
row_84	CACNG2	2666	4.08475	0.523495	Yes
row_85	AP2B1	2683	4.06571	0.525993	Yes
row_86	PPP3CC	2713	4.03236	0.527799	Yes
row_87	ERC2	2720	4.02198	0.530772	Yes
row_88	PFN2	2795	3.93038	0.530193	Yes
row_89	SH3GL3	2836	3.87453	0.531308	Yes
row_90	SYN3	2838	3.87167	0.534415	Yes
row_91	DBN1	2869	3.84302	0.536015	Yes
row_92	FLRT3	2890	3.82597	0.538112	Yes
row_93	SYT4	2895	3.82323	0.541026	Yes
row_94	VPS35	3003	3.72387	0.538591	Yes
row_95	PAK2	3054	3.68521	0.53904	Yes
row_96	SEMA3F	3061	3.68193	0.541736	Yes
row_97	SRC	3065	3.68027	0.544584	Yes
row_98	CAMK1	3205	3.54694	0.540369	Yes
row_99	CBLN2	3264	3.49664	0.540255	Yes
row_100	GRIN3A	3283	3.47588	0.542169	Yes
row_101	CACNG7	3285	3.47285	0.54495	Yes

## Sheet: GOBP_POSITIVE_REGULATION_OF_SYN
GOBP_POSITIVE_REGULATION_OF_SYNAPTIC_TRANSMISSION
NAME	SYMBOL	RANK IN GENE LIST	RANK METRIC SCORE	RUNNING ES	CORE ENRICHMENT
row_0	SLC4A8	42	32.9372	0.0590635	Yes
row_1	TSHZ3	51	29.6972	0.113832	Yes
row_2	CNR1	57	27.908	0.165428	Yes
row_3	NSG1	69	25.9119	0.213012	Yes
row_4	SHANK2	170	18.1038	0.241575	Yes
row_5	CLSTN2	211	16.5739	0.270338	Yes
row_6	MECP2	252	15.3674	0.29686	Yes
row_7	APP	267	14.9967	0.324013	Yes
row_8	SYT1	270	14.9274	0.351645	Yes
row_9	SERPINE2	413	12.2986	0.367292	Yes
row_10	CALB1	467	11.6065	0.386167	Yes
row_11	NRXN1	528	10.9169	0.403406	Yes
row_12	STAU1	570	10.5795	0.420982	Yes
row_13	GSK3B	826	8.70375	0.424219	Yes
row_14	MAPK1	842	8.5978	0.439432	Yes
row_15	ADCY1	976	7.93529	0.447429	Yes
row_16	RIMS2	997	7.80568	0.460917	Yes
row_17	RIMS3	1068	7.52888	0.471355	Yes
row_18	STXBP1	1093	7.37845	0.483846	Yes
row_19	CACNG4	1146	7.16969	0.494529	Yes
row_20	SNAP25	1173	7.10301	0.506407	Yes
row_21	RELN	1209	6.95604	0.517555	Yes
row_22	CRTC1	1286	6.69365	0.526136	Yes
row_23	NF1	1507	6.10788	0.526326	Yes
row_24	LRRTM2	1511	6.10068	0.537508	Yes
row_25	CLSTN3	1611	5.80493	0.543272	Yes
row_26	TNR	1710	5.58795	0.548683	Yes
row_27	MPP2	1920	5.17274	0.547693	Yes
row_28	FLOT1	2065	4.91149	0.549514	Yes
row_29	CACNG5	2125	4.81354	0.555464	Yes
row_30	SLC24A1	2134	4.80321	0.563982	Yes
row_31	SLC24A2	2188	4.69558	0.570018	Yes
row_32	NLGN3	2217	4.66247	0.57726	Yes
row_33	GRIK2	2281	4.57315	0.582561	Yes
row_34	EPHB2	2386	4.43086	0.585519	Yes
row_35	PTN	2527	4.23741	0.58629	Yes
row_36	SHISA7	2618	4.15283	0.589441	Yes
row_37	CACNG2	2666	4.08475	0.594646	Yes
row_38	STX1B	2678	4.07029	0.60165	Yes
row_39	ROR2	2708	4.04094	0.607687	Yes
row_40	AKAP5	2736	3.99187	0.613734	Yes
row_41	NCSTN	2900	3.82019	0.612564	Yes
row_42	VAMP2	2997	3.72691	0.614619	Yes
row_43	SLC8A3	3035	3.70165	0.61962	Yes
row_44	CYP46A1	3126	3.62888	0.621797	Yes
row_45	CACNG7	3285	3.47285	0.620236	Yes
row_46	PTK2B	3578	3.23842	0.611442	Yes
row_47	PINK1	3642	3.18566	0.614165	Yes
row_48	NTRK1	3703	3.13722	0.61695	Yes
row_49	LRRTM1	3933	2.96889	0.610851	Yes
row_50	NLGN2	4182	2.77528	0.603429	Yes
row_51	STX1A	4209	2.75385	0.607227	Yes
row_52	STX3	4230	2.73743	0.611298	Yes
row_53	CDK5	4371	2.66295	0.609145	Yes
row_54	PTEN	4537	2.57393	0.605558	Yes
row_55	ABL1	4575	2.54676	0.608413	Yes
row_56	ZDHHC12	4576	2.54617	0.613143	Yes
row_57	STX4	4601	2.52116	0.61661	Yes
row_58	PRNP	4658	2.48867	0.618394	Yes
row_59	GRIN2D	4706	2.46137	0.620583	Yes
row_60	RIMS1	4830	2.38933	0.618783	Yes
row_61	RASGRF2	4846	2.3815	0.622447	Yes
row_62	LGI1	4941	2.32765	0.622004	Yes
row_63	SQSTM1	4992	2.30142	0.623744	Yes
