# Supplementary material for: MYCN drives oncogenesis by cooperating with the histone methyltransferase G9a and the WDR5 adaptor to orchestrate global gene transcription
Source: PLoS Biol. 2024 Mar 28;22(3):e3002240. doi: 10.1371/journal.pbio.3002240 (PMC11003700; doi:10.1371/journal.pbio.3002240)
Supplement: S12 Table — (XLSX) [file pbio.3002240.s019.xlsx]

## Sheet: Western
Table S12. List of antibodies used in western blot, co-IP, and ChIP-seq.
Antibody for western blot	company	Catalog Number	Western blot dilution
GAPDH	CST	#5174s	1: 4000
GAPDH	santa cruz	sc-47724	1: 4000
VINCULIN	CST	4650s	1: 2000
MYCN	santa cruz	sc-53993	1: 4000
G9a	Abcam	ab40542	1: 1000
WDR5	Bethyl	A302-430A	1: 1000
Goat anti-Rabbit IgG-HRP	santa cruz	sc-2004	1: 2000
Goat anti-Mouse IgG-HRP	santa cruz	sc-2005	1: 2000

## Sheet: co-IP
Co-IP antibody
MYCN antibody 1	Santa Cruz	sc-53993
MYCN antibody 2	Abcam	ab16898

## Sheet: ChIP
Antibody for ChIP-Seq	Company	Catalog Number	Amount
MYCN	Active motif	61185	4 µg
H3K4me3	CST	9751	4 µg
H3K27me3	millipore	07-449	4 µg
H3K27Ac	Active Motif	39133	5 µg
H3K4me1	Active motif	39297	10 µg
WDR5	Bethyl	A302-429A	4 µg
G9a	CST	3306, lot2	25 µg
